# Supplementary material for: Global hyperactivation of enhancers stabilizes human and mouse naive pluripotency through inhibition of CDK8/19 Mediator kinases
Source: Springer Nature journal article supplement (doi:10.1038/s41556-020-0573-1), 2020-09-28
Supplement: MOESM10 [file 41556_2020_573_MOESM10_ESM.xlsx]

## Sheet: Fig 4A
Fig 4A	Hypergeometric Test
Total population		13136
Differential in 2i		6705
Differential in CDK8/19i		6478
Overlap		4008
P = 1.54 x 10(-133)

## Sheet: Fig 4C
Fig 4C	Hypergeometric Test
Total population		1500
Differential in 2i		79
Differential in CDK8/19i		80
Overlap		57
P = 1.03 x 10(-65)

## Sheet: Fig 4D
Fig 4D	Overlap with 2C-markers
The gene list below for "2C-marker genes" was compared against the genes decreased in "Control vs CDK8/19i" RNAseq in Supplementary Table 2, Section#4. This list of 2C-marker genes (n = 112) (also used in Extended Data Fig 3i), is from a previous study (Macfarlan et al., 2012; Reference: 46). Data from Macfarlan T et al 2012 -Nature, Supplementary Table 4: Genes differentially expressed in MERVL:…
2C-Fluctuation Geneset #1	n=112
Macfarlan et al., 2012;	Ref (46)
3110040M04Rik
A430089I19Rik
A530040E14Rik
AA792892
Abcb5
Adh7
AI427809
Ankrd22
Apol7b
Apol7e
Arg2
Arhgef12
Arl4d
Arsk
Asb12
B020004J07Rik
BB287469
BC061212
BC080695
Bex6
C130073F10Rik
C87414
Calhm3
Ccno
Chit1
Chrm3
Cml2
Cpb2
Crct1
Ctf2
D5Ertd577e
Defb25
Dppa3
Drd3
Dub1
Dub1a
Dub2a
Dub3
Dux
Duxbl
E330014E10Rik
EG381936
EG381936
EG435337
Gal3st2
Gm10526
Gm10679
Gm10696
Gm11545
Gm12794
Gm13040
Gm13119
Gm15698
Gm16367
Gm16368
Gm3994
Gm428
Gm4312
Gm4340
Gm4858
Gm4971
Gm5039
Gm5698
Gm5891
Gm7682
Gm7792
Gm7957
Gm8994
Gpnmb
Guca1a
Krtap4-13
LOC100047081
LOC624931
LOC625240
LOC625360
LOC676461
Lonrf3
Neto2
Obox3
Obox6
Olfr329
Phf11
Pramel6
Pramel7
Prkch
Slc10a6
Slc25a31
Slc34a2
Sp110
Sp140
Speer8-ps1
Spz1
Stox1
Sycp1
Taf7l
Tcstv1
Tcstv3
Tdpoz1
Tdpoz2
Tdpoz3
Tdpoz4
Tdpoz5
Tmem92
Ubtfl1
Usp17l5
Zfp352
Zfp353
Zscan4a
Zscan4b
Zscan4c
Zscan4d
Zscan4e

## Sheet: Fig 4E
Fig 4E	A table of published mouse embryonic stem cells datasets used in this study for comparisons found in Figure 4E and Extended Data 4D,E
Source Data Fig 4E: A table of published mouse embryonic stem cells datasets used in this study for comparisons found in Figure 4E and Extended Data 4D,E									GSEA data values from Heatmap of Fig4e
									Up-regulated
									Down-regulated
	Reference in current study
		Dataset	Accession number	Processed data	PRIMED	NAÏVE					Marks et al (Ref: 23)				Buecker et al (Ref: 50)				BULUT et al (Ref: 51)				Fidalgo_2 et al (Ref: 49)				Fidalgo_3 et al (Ref:49)				Kolo_2i (Ref: 48)				Kolo_a2i (Ref: 48)				This Study 2i-naïve				This Study CDK8/19i
	50	Buecker et al 2014	GSE56138	Table S1	1xEpiLC	1xESC			NAME	SIZE	ES	NES	NOM p-val	FDR q-val	ES	NES	NOM p-val	FDR q-val	ES	NES	NOM p-val	FDR q-val	ES	NES	NOM p-val	FDR q-val	ES	NES	NOM p-val	FDR q-val	ES	NES	NOM p-val	FDR q-val	ES	NES	NOM p-val	FDR q-val	ES	NES	NOM p-val	FDR q-val	ES	NES	NOM p-val	FDR q-val
	23	Marks et al 2012	GSE23943	Table S2	3xSerum	3x2i			MORULAE		0.06	1.19	0.24	0.23	-0.04	-0.82	0.666	0.692	0.12	2.68	0.002	0.001	0.08	1.73	0.014	0.02	0.09	1.88	0.01	0.018	0.14	2.41	0	0	-0.08	-1.22	0.202	0.197	0.06	1.31	0.152	0.155	-0.04	-1.01	0.421	0.426
	51	Bulut et al 2016	GSE81285	Table S2	2xSerum	2x2i			ICM		0.18	3.48	0	0	0.19	3.88	0	0	0.32	6.38	0	0	0.25	4.92	0	0	0.2	3.94	0	0	0.31	4.88	0	0	0.24	3.57	0	0	0.22	4.39	0	0	0.14	2.66	0	0
	49	Fidalgo et al 2016	GSE81045	-	2xSerum/LIF	2x2i_48h			PreIMPL EPIBLAST		0.18	2.2	0	0.002	0.47	5.64	0	0	0.22	2.77	0	0.002	0.27	3.38	0	0	0.14	1.67	0.026	0.035	0.34	3.57	0	0	0.36	3.8	0	0	0.25	3.13	0	0	0.27	3.39	0	0
	49	Fidalgo et al 2016	GSE81045	-	2xSerum/LIF	2ix2i_16d			PostIMPL EPIBLAST		-0.38	-6.12	0	0	-0.33	-5.4	0	0	-0.45	-7.23	0	0	-0.31	-5.04	0	0	-0.43	-6.8	0	0	-0.52	-6.62	0	0	-0.45	-5.98	0	0	-0.35	-5.64	0	0	-0.27	-4.43	0	0
	48	Kolodziejczyk et al 2015	E-MTAB-2600	http://www.ebi.ac.uk/teichmann-srv/espresso/	250x Serum/LIF	295x 2i and 159x a2i			CNIO mESCs 2i UP		0.47	13.14	0	0	0.43	12.61	0	0	0.66	18.86	0	0	0.63	16.43	0	0	0.51	14.3	0	0	0.72	12.96	0	0	0.57	8.9	0	0	0.98	28.72	0	0	0.43	12.41	0	0
									CNIO mESCs 8i UP		0.15	4.71	0	0	0.29	10.12	0	0	0.33	10.98	0	0	0.28	8.02	0	0	0.21	6.52	0	0	0.52	8.17	0	0	0.41	5.65	0	0	0.31	10.5	0	0	0.43	12.41	0	0
									CNIO mESCs 2i DOWN		-0.51	-19.72	0	0	-0.33	-13.54	0	0	-0.56	-21.94	0	0	-0.51	-18.76	0	0	-0.54	-20.04	0	0	-0.64	-12.72	0	0	-0.53	-10.81	0	0	-0.94	-38.69	0	0	-0.41	-16.52	0	0
									CNIO mESCs 8i DOWN		-0.27	-8.92	0	0	-0.28	-9.62	0	0	-0.36	-12.29	0	0	-0.27	-8.61	0	0	-0.3	-9.54	0	0	-0.36	-7.2	0	0	-0.38	-7.03	0	0	-0.46	-16	0	0	-0.96	-33.5	0	0

## Sheet: Fig 4F
Fig 4F	Differentially Expressed Genes (DEG) in human PSCs and hypergeometric significance test of different inhibitor conditions							Source Data Figure 4F: Differentially Expressed Genes (DEG) at significance FDR<0.05 are listed. Data for Figure 4F Venn diagram are shown, selecting those genes differentially expressed with >2x fold-change and FDR<0.05. Data shown represents the control Primed condition versus, naïve (2ip = 2i/p38/JNKi), CDK8/19i + p38/JNKi (=8ip), or, CDK8/19i-only (=8i_ONLY) conditions (see: Methods for cultu…
Source Data Figure 4F: Differentially Expressed Genes (DEG) in human PSCs treated as indicated in the Venn diagram. BELOW: hypergeometric significance test for the overlaps in the Venn diagram. ON THE RIGHT: gene lists for the Venn diagram.
								Sorted Log2_FC high to low
								Significant diff ONLY	gene	locus	START	END	Primed	2ip	log2(fold_change)	q_value	significant	status			gene	locus	START	END	Primed	8ip	log2(fold_change)	q_value	significant	status			gene	locus	START	END	Primed	8iONLY	log2(fold_change)	q_value	significant	status
								FDR<0,05	AZU1	chr19	827830	832017	0.984169	0	#NAME?	0.000821971	yes	OK			CMTM5	chr14	23846016	23848981	1.35199	0	#NAME?	0.000821971	yes	OK			CMTM5	chr14	23846016	23848981	1.35199	0	#NAME?	0.000821971	yes	OK
									CMTM5	chr14	23846016	23848981	1.35199	0	#NAME?	0.000821971	yes	OK			KRTAP20-4	chr21	31992945	31993169	5.70576	0	#NAME?	0.000821971	yes	OK			TNNT3	chr11	1940798	1959936	5.84089	0	#NAME?	0.000821971	yes	OK
									DOC2GP	chr11	67380994	67383135	1.13439	0	#NAME?	0.000821971	yes	OK			FXYD3	chr19	35606731	35615228	0	3.02014	inf	0.000821971	yes	OK			FBLN7	chr2	112895961	112945791	2.07682	0	#NAME?	0.000821971	yes	OK
	Hypergeometric Test								FOXS1	chr20	30432102	30433420	1.43055	0	#NAME?	0.000821971	yes	OK			HAND1	chr5	153854440	153857824	0	4.59033	inf	0.000821971	yes	OK			MMRN1	chr4	90816051	90875780	1.07157	0	#NAME?	0.000821971	yes	OK
									TNNI2	chr11	1860232	1862910	1.17447	0	#NAME?	0.000821971	yes	OK			IFITM5	chr11	298202	299526	0	0.787289	inf	0.000821971	yes	OK			FXYD3	chr19	35606731	35615228	0	6.71667	inf	0.000821971	yes	OK
									FXYD3	chr19	35606731	35615228	0	3.16406	inf	0.000821971	yes	OK			LOC100288748	chr8	95649512	95651695	0	1.02673	inf	0.000821971	yes	OK			HAND1	chr5	153854440	153857824	0	12.6467	inf	0.000821971	yes	OK
	Total population		13159						HAND1	chr5	153854440	153857824	0	17.1412	inf	0.000821971	yes	OK			MAGEB2	chrX	30233674	30238206	0	0.956321	inf	0.000821971	yes	OK			IFITM5	chr11	298202	299526	0	1.48557	inf	0.000821971	yes	OK
	Differential in CDK8/19i		2892						IFITM5	chr11	298202	299526	0	1.12864	inf	0.000821971	yes	OK			OVOL2	chr20	18004780	18039614	0	1.51257	inf	0.000821971	yes	OK			LOC100288748	chr8	95649512	95651695	0	1.02128	inf	0.000821971	yes	OK
	Differential in CDK8/19i + p38iJNKi		2548						LOC100288748	chr8	95649512	95651695	0	0.839718	inf	0.000821971	yes	OK			PNLDC1	chr6	160221300	160241735	0	0.927118	inf	0.000821971	yes	OK			MAGEB2	chrX	30233674	30238206	0	0.925571	inf	0.000821971	yes	OK
	Differential in 2i + p38iJNKi		2632						MAGEB2	chrX	30233674	30238206	0	0.969314	inf	0.000821971	yes	OK			ZSCAN1	chr19	58545433	58565999	0	1.60876	inf	0.000821971	yes	OK			OVOL2	chr20	18004780	18039614	0	2.34354	inf	0.000821971	yes	OK
	Overlap (all 3 conditions)		1760						OVOL2	chr20	18004780	18039614	0	4.11443	inf	0.000821971	yes	OK			CDH1	chr16	68771194	68869571	0.190147	75.296	8.62932	0.000821971	yes	OK			PNLDC1	chr6	160221300	160241735	0	1.25843	inf	0.000821971	yes	OK
									PNLDC1	chr6	160221300	160241735	0	1.18725	inf	0.000821971	yes	OK			NLRP7	chr19	55434688	55459039	0.662984	251.782	8.56899	0.000821971	yes	OK			ZSCAN1	chr19	58545433	58565999	0	2.22729	inf	0.000821971	yes	OK
	For all Venn overlaps		P < 1.0 x 10(-327)						SNAR-D	chr19	50643458	50643577	0	60.0175	inf	0.000821971	yes	OK			LRRTM4	chr2	76806809	77779697	0.121903	43.2265	8.47004	0.000821971	yes	OK			CDH1	chr16	68771194	68869571	0.190147	106.594	9.1308	0.000821971	yes	OK
									ZSCAN1	chr19	58545433	58565999	0	1.15318	inf	0.000821971	yes	OK			NODAL	chr10	72189698	72202280	0.239097	84.5391	8.46588	0.000821971	yes	OK			DNMT3L	chr21	45663909	45698779	0.206703	109.055	9.04328	0.000821971	yes	OK
	Specific overlaps								DNMT3L	chr21	45663909	45698779	0.206703	144.713	9.45141	0.000821971	yes	OK			DNMT3L	chr21	45663909	45698779	0.206703	60.3199	8.18893	0.000821971	yes	OK			NODAL	chr10	72189698	72202280	0.239097	110.907	8.85753	0.000821971	yes	OK
									NLRP7	chr19	55434688	55459039	0.662984	291.297	8.7793	0.000821971	yes	OK			CST1,CST2,CST4	chr20	23666252	23807320	0.768182	169.691	7.78725	0.000821971	yes	OK			NLRP7	chr19	55434688	55459039	0.662984	273.896	8.69044	0.000821971	yes	OK
	[CDK8/19i] vs [CDK8/19i + p38iJNKi]		P = 6.4 x 10(-1556)						NODAL	chr10	72189698	72202280	0.239097	95.7804	8.64599	0.000821971	yes	OK			PVRL4	chr1	161015857	161059385	0.0950926	16.1412	7.4072	0.000821971	yes	OK			CST1,CST2,CST4	chr20	23666252	23807320	0.768182	245.672	8.32107	0.000821971	yes	OK
	[CDK8/19i] vs [2i + p38iJNKi]		P = 1.3 x 10(-952)						CDH1	chr16	68771194	68869571	0.190147	69.6993	8.51789	0.000821971	yes	OK			TDGF1	chr3	46616044	46639277	1.90378	322.402	7.40385	0.000821971	yes	OK			LRRTM4	chr2	76806809	77779697	0.121903	33.9248	8.12046	0.000821971	yes	OK
	[CDK8/19i + p38iJNKi] vs [2i + p38iJNKi]								LRRTM4	chr2	76806809	77779697	0.121903	32.6445	8.06496	0.000821971	yes	OK			ESRP1	chr8	95653325	95719696	0.115778	19.4151	7.38967	0.000821971	yes	OK			ALPI,ALPP,ALPPL2	chr2	232826292	233324742	0.648894	179.757	8.11385	0.000821971	yes	OK
									ESRP1	chr8	95653325	95719696	0.115778	19.9766	7.43081	0.000821971	yes	OK			TDGF1P3	chrX	109763539	109766249	0.416572	65.5362	7.29758	0.000821971	yes	OK			PKP3	chr11	394216	404909	0.215021	59.1299	8.10327	0.000821971	yes	OK
									FGF4	chr11	69585780	69590241	0.247199	38.2447	7.27345	0.000821971	yes	OK			PKP3	chr11	394216	404909	0.215021	31.008	7.17202	0.000821971	yes	OK			PVRL4	chr1	161015857	161059385	0.0950926	19.3122	7.66597	0.000821971	yes	OK
									PKP3	chr11	394216	404909	0.215021	27.3922	6.99314	0.000821971	yes	OK			ALPI,ALPP,ALPPL2	chr2	232826292	233324742	0.648894	85.8134	7.04708	0.000821971	yes	OK			C1orf49	chr1	178468633	178494274	0.0606395	9.67999	7.3186	0.000821971	yes	OK
									TDGF1P3	chrX	109763539	109766249	0.416572	49.469	6.89182	0.000821971	yes	OK			LAMB3,MIR4260	chr1	209788211	209826095	0.150206	16.295	6.76134	0.000821971	yes	OK			HPGD	chr4	175411228	175444049	0.18964	29.0907	7.26116	0.000821971	yes	OK
									TDGF1	chr3	46616044	46639277	1.90378	213.964	6.81236	0.000821971	yes	OK			C1orf49	chr1	178468633	178494274	0.0606395	5.9082	6.60632	0.000821971	yes	OK			TDGF1	chr3	46616044	46639277	1.90378	287.067	7.23638	0.000821971	yes	OK
									ACOXL	chr2	111490115	111876118	0.241124	23.8497	6.62805	0.000821971	yes	OK			HPGD	chr4	175411228	175444049	0.18964	18.2621	6.58945	0.000821971	yes	OK			ESRP1	chr8	95653325	95719696	0.115778	17.2567	7.21965	0.000821971	yes	OK
									HPGD	chr4	175411228	175444049	0.18964	17.1038	6.49491	0.000821971	yes	OK			NCF2	chr1	183524647	183570990	0.0681869	6.02438	6.46517	0.000821971	yes	OK			TDGF1P3	chrX	109763539	109766249	0.416572	58.6864	7.13832	0.000821971	yes	OK
									PCSK1	chr5	95726039	95768985	0.0684775	5.91645	6.43296	0.000821971	yes	OK			FGF4	chr11	69585780	69590241	0.247199	21.2424	6.42513	0.000821971	yes	OK			SLC34A2	chr4	25649640	25680441	0.81294	104.979	7.01273	0.000821971	yes	OK
									ALPI,ALPP,ALPPL2	chr2	232826292	233324742	0.648894	53.555	6.3669	0.000821971	yes	OK			C4orf51,ZNF827	chr4	146601355	146859607	0.179262	14.6909	6.35671	0.000821971	yes	OK			LAMB3,MIR4260	chr1	209788211	209826095	0.150206	18.8276	6.96976	0.000821971	yes	OK
									TFCP2L1	chr2	121974163	122042778	0.079959	6.24769	6.28792	0.000821971	yes	OK			GRB7	chr17	37894161	37903538	0.290719	23.5094	6.33747	0.000821971	yes	OK			LAMC2	chr1	183155173	183387634	0.268731	29.1991	6.76362	0.000821971	yes	OK
									ITGB1BP3	chr19	3933100	3956600	0.456917	32.5664	6.15531	0.000821971	yes	OK			SP5	chr2	171571856	171574517	0.452766	35.8838	6.30842	0.000821971	yes	OK			NCF2	chr1	183524647	183570990	0.0681869	7.36765	6.75557	0.000821971	yes	OK
									ATF5,MIR4751	chr19	50392913	50437205	1.32	92.7986	6.1355	0.000821971	yes	OK			CD9	chr12	6309001	6364331	4.84309	375.031	6.27494	0.000821971	yes	OK			CD9	chr12	6309001	6364331	4.84309	521.637	6.75097	0.000821971	yes	OK
									PVRL4	chr1	161015857	161059385	0.0950926	6.21942	6.0313	0.000821971	yes	OK			LAD1	chr1	201349965	201368669	0.216254	16.5319	6.25638	0.000821971	yes	OK			LAD1	chr1	201349965	201368669	0.216254	22.0467	6.67169	0.000821971	yes	OK
									SP5	chr2	171571856	171574517	0.452766	28.0536	5.95328	0.000821971	yes	OK			ITGB1BP3	chr19	3933100	3956600	0.456917	34.8626	6.25361	0.000821971	yes	OK			LOC283116	chr11	49050407	49059529	0.209358	20.0156	6.57901	0.000821971	yes	OK
									C6orf132	chr6	42068856	42110715	0.11356	6.89432	5.92389	0.000821971	yes	OK			LAMC2	chr1	183155173	183387634	0.268731	20.0395	6.22054	0.000821971	yes	OK			PRAMEF1,PRAMEF12,PRAMEF2	chr1	12833878	12987549	1.49592	140.796	6.55644	0.000821971	yes	OK
									CDA	chr1	20915443	20945402	0.539266	32.6387	5.91944	0.000821971	yes	OK			ACOXL	chr2	111490115	111876118	0.241124	16.7645	6.11949	0.000821971	yes	OK			DPPA3	chr12	7863957	7870156	0.983373	90.5072	6.52415	0.000821971	yes	OK
									LAD1	chr1	201349965	201368669	0.216254	12.9717	5.9065	0.000821971	yes	OK			ZSCAN10	chr16	3138834	3158329	1.50728	102.59	6.0888	0.000821971	yes	OK			CCNA1	chr13	37005966	37017019	1.18768	96.5644	6.34528	0.000821971	yes	OK
									POU5F1P3	chr12	8276227	8291203	0.982442	58.7377	5.90177	0.000821971	yes	OK			SCNN1A	chr12	6456008	6486523	0.28652	18.5381	6.01572	0.000821971	yes	OK			GRB7	chr17	37894161	37903538	0.290719	23.2883	6.32384	0.000821971	yes	OK
									KIAA0040	chr1	175126122	175162229	0.0583631	3.48277	5.89903	0.000821971	yes	OK			EPS8L2	chr11	706018	727756	0.933872	60.2738	6.01216	0.000821971	yes	OK			EPS8L2	chr11	706018	727756	0.933872	74.4041	6.31601	0.000821971	yes	OK
									C4orf51,ZNF827	chr4	146601355	146859607	0.179262	10.0528	5.80938	0.000821971	yes	OK			POU5F1P3	chr12	8276227	8291203	0.982442	63.1526	6.00633	0.000821971	yes	OK			KDM4DL	chr11	94752068	94762686	0.157002	12.3476	6.2973	0.000821971	yes	OK
									NCF2	chr1	183524647	183570990	0.0681869	3.79776	5.79951	0.000821971	yes	OK			DPPA3	chr12	7863957	7870156	0.983373	63.1328	6.00451	0.000821971	yes	OK			CDH3	chr16	68678150	68732957	1.0799	76.8413	6.15291	0.000821971	yes	OK
									GRB7	chr17	37894161	37903538	0.290719	15.9106	5.77421	0.000821971	yes	OK			APOA1	chr11	116706463	116708338	0.8123	51.5978	5.98915	0.000821971	yes	OK			ITGB1BP3	chr19	3933100	3956600	0.456917	32.3411	6.14529	0.000821971	yes	OK
									SCNN1A	chr12	6456008	6486523	0.28652	15.391	5.74731	0.000821971	yes	OK			CDH3	chr16	68678150	68732957	1.0799	68.1896	5.98058	0.000821971	yes	OK			MIR371A,MIR372,MIR373	chr19	54290226	54295253	0.394137	27.1259	6.10483	0.000821971	yes	OK
									HEY2	chr6	126070731	126082415	0.282127	14.9505	5.72771	0.000821971	yes	OK			KIAA0040	chr1	175126122	175162229	0.0583631	3.66356	5.97204	0.000821971	yes	OK			RFPL4B	chr6	112668531	112672498	0.597823	41.0834	6.10269	0.000821971	yes	OK
									CD9	chr12	6309001	6364331	4.84309	249.38	5.68627	0.000821971	yes	OK			TFCP2L1	chr2	121974163	122042778	0.079959	5.01416	5.9706	0.000821971	yes	OK			ACOXL	chr2	111490115	111876118	0.241124	16.5203	6.09832	0.000821971	yes	OK
									PLA2G2A	chr1	20301923	20306932	0.348853	17.2224	5.62552	0.000821971	yes	OK			CDA	chr1	20915443	20945402	0.539266	30.5001	5.82167	0.000821971	yes	OK			APOA1	chr11	116706463	116708338	0.8123	55.5783	6.09637	0.000821971	yes	OK
									GCNT1	chr9	79056581	79122332	0.0797994	3.82991	5.58479	0.000821971	yes	OK			SLC34A2	chr4	25649640	25680441	0.81294	44.9933	5.79042	0.000821971	yes	OK			ZSCAN10	chr16	3138834	3158329	1.50728	96.8899	6.00633	0.000821971	yes	OK
									IL6R	chr1	154377668	154441926	0.190575	9.03701	5.56742	0.000821971	yes	OK			VSNL1	chr2	17721378	17837746	0.322402	16.7431	5.69856	0.000821971	yes	OK			HFE2	chr1	145411536	145417610	0.175379	11.0378	5.97584	0.000821971	yes	OK
									ZSCAN10	chr16	3138834	3158329	1.50728	70.7688	5.5531	0.000821971	yes	OK			GDF3	chr12	7842380	7848360	3.04957	158.284	5.69776	0.000821971	yes	OK			AIRE	chr21	45705368	45718527	0.0813075	5.03742	5.95315	0.000821971	yes	OK
									C1orf49	chr1	178468633	178494274	0.0606395	2.74602	5.50094	0.000821971	yes	OK			LOC283116	chr11	49050407	49059529	0.209358	10.487	5.64649	0.000821971	yes	OK			IL6R	chr1	154377668	154441926	0.190575	11.746	5.94567	0.000821971	yes	OK
									SYK	chr9	93563985	93660842	0.0427637	1.86907	5.44979	0.000821971	yes	OK			PITX2	chr4	111538579	111563279	0.0705753	3.514	5.63781	0.000821971	yes	OK			KIAA0040	chr1	175126122	175162229	0.0583631	3.57951	5.93856	0.000821971	yes	OK
									CDH3	chr16	68678150	68732957	1.0799	47.0072	5.44391	0.000821971	yes	OK			HHLA1,OC90	chr8	133036436	133117512	0.931766	45.1017	5.59707	0.000821971	yes	OK			FGF4	chr11	69585780	69590241	0.247199	15.0581	5.92873	0.000821971	yes	OK
									LAMC2	chr1	183155173	183387634	0.268731	11.5126	5.42091	0.000821971	yes	OK			CCNA1	chr13	37005966	37017019	1.18768	54.9383	5.5316	0.000821971	yes	OK			PITX2	chr4	111538579	111563279	0.0705753	4.2743	5.92038	0.000821971	yes	OK
									KRT14,KRT17,KRT19	chr17	39679840	39780882	4.10506	175.04	5.41414	0.000821971	yes	OK			GCNT1	chr9	79056581	79122332	0.0797994	3.64603	5.5138	0.000821971	yes	OK			CDA	chr1	20915443	20945402	0.539266	32.4047	5.90906	0.000821971	yes	OK
									HHLA1,OC90	chr8	133036436	133117512	0.931766	37.2411	5.32078	0.000821971	yes	OK			MIXL1	chr1	226411230	226415084	0.584411	26.1073	5.48133	0.000821971	yes	OK			TFCP2L1	chr2	121974163	122042778	0.079959	4.79555	5.90629	0.000821971	yes	OK
									LAMB3,MIR4260	chr1	209788211	209826095	0.150206	5.38813	5.16477	0.000821971	yes	OK			ACTA1	chr1	229553682	229569843	5.03281	222.121	5.46384	0.000821971	yes	OK			TRIM43B	chr2	96142714	96150479	0.204577	12.1862	5.89646	0.000821971	yes	OK
									GYLTL1B	chr11	45943195	45950831	1.84098	66.0353	5.1647	0.000821971	yes	OK			AIRE	chr21	45705368	45718527	0.0813075	3.57787	5.45957	0.000821971	yes	OK			SCNN1A	chr12	6456008	6486523	0.28652	16.8174	5.87517	0.000821971	yes	OK
									USP43	chr17	9548680	9633066	0.273875	9.37715	5.09756	0.000821971	yes	OK			PRAMEF1,PRAMEF12,PRAMEF2	chr1	12833878	12987549	1.49592	65.3028	5.44804	0.000821971	yes	OK			OVOL1	chr11	65554504	65564690	0.141236	8.23937	5.86635	0.000821971	yes	OK
									AIRE	chr21	45705368	45718527	0.0813075	2.73717	5.07315	0.000821971	yes	OK			RASAL1	chr12	113536623	113574044	0.0735617	3.08691	5.39106	0.000821971	yes	OK			MIXL1	chr1	226411230	226415084	0.584411	33.447	5.83875	0.000821971	yes	OK
									COBL	chr7	51083906	51384515	0.0848903	2.76684	5.0265	0.000821971	yes	OK			RGL3	chr19	11504731	11530018	0.107508	4.48707	5.38326	0.000821971	yes	OK			C4orf51,ZNF827	chr4	146601355	146859607	0.179262	9.89105	5.78598	0.000821971	yes	OK
									ZYG11A	chr1	53308182	53360839	0.214814	6.49589	4.91837	0.000821971	yes	OK			IL6R	chr1	154377668	154441926	0.190575	7.88389	5.37048	0.000821971	yes	OK			PLA2G2A	chr1	20301923	20306932	0.348853	18.7709	5.74973	0.000821971	yes	OK
									EPS8L2	chr11	706018	727756	0.933872	27.3741	4.87344	0.000821971	yes	OK			KDM4DL	chr11	94752068	94762686	0.157002	6.47782	5.36665	0.000821971	yes	OK			VSNL1	chr2	17721378	17837746	0.322402	17.2719	5.74342	0.000821971	yes	OK
									UAP1L1	chr9	139971930	139979120	0.99896	28.7918	4.84909	0.000821971	yes	OK			COBL	chr7	51083906	51384515	0.0848903	3.38085	5.31564	0.000821971	yes	OK			RRAD	chr16	66955581	66959439	0.752613	39.7664	5.7235	0.000821971	yes	OK
									VSNL1	chr2	17721378	17837746	0.322402	8.69326	4.75297	0.000821971	yes	OK			HEY2	chr6	126070731	126082415	0.282127	10.8265	5.26208	0.000821971	yes	OK			GDF3	chr12	7842380	7848360	3.04957	159.659	5.71025	0.000821971	yes	OK
									RGL3	chr19	11504731	11530018	0.107508	2.89857	4.75283	0.000821971	yes	OK			OVOL1	chr11	65554504	65564690	0.141236	5.2245	5.20911	0.000821971	yes	OK			KRT14,KRT17,KRT19	chr17	39679840	39780882	4.10506	209.767	5.67524	0.000821971	yes	OK
									TFAP2C	chr20	55200166	55225629	1.76745	46.6828	4.72315	0.000821971	yes	OK			TFAP2C	chr20	55200166	55225629	1.76745	62.6911	5.14852	0.000821971	yes	OK			POU5F1P3	chr12	8276227	8291203	0.982442	50.1847	5.67473	0.000821971	yes	OK
									MATK	chr19	3777966	3801810	0.605356	15.5869	4.68641	0.000821971	yes	OK			WNT5B	chr12	1726221	1756400	0.680424	24.1083	5.14695	0.000821971	yes	OK			GCNT1	chr9	79056581	79122332	0.0797994	4.00952	5.65091	0.000821971	yes	OK
									CGNL1	chr15	57668702	57842925	0.111432	2.40117	4.4295	0.000821971	yes	OK			EPCAM	chr2	47596188	47614172	6.41418	212.729	5.05161	0.000821971	yes	OK			TRIM48	chr11	55029657	55039177	0.28079	13.4245	5.57923	0.000821971	yes	OK
									ELMO3	chr16	67233027	67237927	0.295809	6.36581	4.42761	0.000821971	yes	OK			HFE2	chr1	145411536	145417610	0.175379	5.77111	5.0403	0.000821971	yes	OK			RFPL2	chr22	32586421	32600718	0.276073	13.0371	5.56142	0.000821971	yes	OK
									SMARCA2	chr9	2015341	2193624	0.53437	11.2618	4.39745	0.000821971	yes	OK			STC2	chr5	172741725	172756506	0.401733	13.1916	5.03724	0.000821971	yes	OK			WNT5B	chr12	1726221	1756400	0.680424	29.7083	5.44829	0.000821971	yes	OK
									SUN3	chr7	48026635	48068716	0.315889	6.60676	4.38645	0.000821971	yes	OK			C6orf132	chr6	42068856	42110715	0.11356	3.72778	5.03679	0.000821971	yes	OK			MATK	chr19	3777966	3801810	0.605356	25.9851	5.42376	0.000821971	yes	OK
									MYOZ3	chr5	150040403	150058925	0.0853755	1.69333	4.3099	0.000821971	yes	OK			RFPL4B	chr6	112668531	112672498	0.597823	19.2997	5.01272	0.000821971	yes	OK			RASAL1	chr12	113536623	113574044	0.0735617	2.94887	5.32507	0.000821971	yes	OK
									FBP1	chr9	97365415	97402531	0.997046	19.4484	4.28585	0.000821971	yes	OK			GYLTL1B	chr11	45943195	45950831	1.84098	58.6624	4.99389	0.000821971	yes	OK			COBL	chr7	51083906	51384515	0.0848903	3.35442	5.30432	0.000821971	yes	OK
									PAPSS2	chr10	89419374	89507523	0.320668	6.23395	4.28099	0.000821971	yes	OK			SYK	chr9	93563985	93660842	0.0427637	1.33512	4.96444	0.000821971	yes	OK			RGL3	chr19	11504731	11530018	0.107508	4.09471	5.25125	0.000821971	yes	OK
									CHST9	chr18	24432007	24765302	0.230685	4.36458	4.24185	0.000821971	yes	OK			KRT14,KRT17,KRT19	chr17	39679840	39780882	4.10506	128.037	4.96301	0.000821971	yes	OK			ELMO3	chr16	67233027	67237927	0.295809	11.1141	5.23158	0.000821971	yes	OK
									SPINT1	chr15	41136245	41150378	4.70319	87.8486	4.22331	0.000821971	yes	OK			MATK	chr19	3777966	3801810	0.605356	18.8275	4.95891	0.000821971	yes	OK			HHLA1,OC90	chr8	133036436	133117512	0.931766	34.9173	5.22783	0.000821971	yes	OK
									MIXL1	chr1	226411230	226415084	0.584411	10.877	4.21816	0.000821971	yes	OK			TRIM43	chr2	96257765	96265469	0.189175	5.86161	4.9535	0.000821971	yes	OK			ATP12A	chr13	25254548	25286590	0.071305	2.60714	5.19232	0.000821971	yes	OK
									MIR4750,TBC1D17	chr19	50372250	50392050	19.8188	366.631	4.20939	0.000821971	yes	OK			LOC100507127	chr10	6816877	6884941	0.325953	9.7521	4.90297	0.000821971	yes	OK			PHLDA1	chr12	76419226	76425556	0.802191	29.3064	5.19113	0.000821971	yes	OK
									PDLIM1	chr10	96997329	97050781	5.52339	100.026	4.17867	0.000821971	yes	OK			ANXA3	chr4	79472741	79531605	1.15005	33.5829	4.86795	0.000821971	yes	OK			TFAP2C	chr20	55200166	55225629	1.76745	62.556	5.14541	0.000821971	yes	OK
									EPCAM	chr2	47596188	47614172	6.41418	116.005	4.17678	0.000821971	yes	OK			RRAD	chr16	66955581	66959439	0.752613	21.502	4.83642	0.000821971	yes	OK			UAP1L1	chr9	139971930	139979120	0.99896	35.1588	5.13731	0.000821971	yes	OK
									VRTN	chr14	74815165	74826711	0.700935	12.5702	4.16459	0.000821971	yes	OK			ELMO3	chr16	67233027	67237927	0.295809	8.36151	4.82103	0.000821971	yes	OK			CPT1A	chr11	68522087	68609399	0.406646	14.0552	5.11119	0.000821971	yes	OK
									PHLDA1	chr12	76419226	76425556	0.802191	14.176	4.14336	0.000821971	yes	OK			GBA3	chr4	22618406	22821283	0.639831	17.4519	4.76955	0.000821971	yes	OK			PDGFA	chr7	536664	559793	0.289221	9.85393	5.09045	0.000821971	yes	OK
									DDIT4L	chr4	101107026	101111655	0.130657	2.27915	4.12463	0.000821971	yes	OK			UAP1L1	chr9	139971930	139979120	0.99896	26.6045	4.7351	0.000821971	yes	OK			C6orf132	chr6	42068856	42110715	0.11356	3.81996	5.07204	0.000821971	yes	OK
									MIR1204,MIR1206,PVT1	chr8	128806536	129113541	11.3696	197.946	4.12186	0.000821971	yes	OK			MIR371A,MIR372,MIR373	chr19	54290226	54295253	0.394137	10.483	4.73321	0.000821971	yes	OK			GBA3	chr4	22618406	22821283	0.639831	21.3312	5.05913	0.000821971	yes	OK
									IL15	chr4	142557748	142655140	0.112234	1.82515	4.02343	0.000821971	yes	OK			ZYG11A	chr1	53308182	53360839	0.214814	5.68369	4.72567	0.000821971	yes	OK			GYLTL1B	chr11	45943195	45950831	1.84098	61.0437	5.0513	0.000821971	yes	OK
									SLC47A1	chr17	19437166	19482346	0.298333	4.75881	3.99561	0.000821971	yes	OK			VRTN	chr14	74815165	74826711	0.700935	17.8818	4.67307	0.000821971	yes	OK			ZYG11A	chr1	53308182	53360839	0.214814	6.89023	5.00339	0.000821971	yes	OK
									PRR15	chr7	29603425	29606983	1.26729	20.1824	3.99327	0.000821971	yes	OK			FBP1	chr9	97365415	97402531	0.997046	24.9317	4.64417	0.000821971	yes	OK			EPCAM	chr2	47596188	47614172	6.41418	201.749	4.97515	0.000821971	yes	OK
									TEC	chr4	48137799	48271814	0.0967918	1.50225	3.95609	0.000821971	yes	OK			SPINT1	chr15	41136245	41150378	4.70319	116.593	4.6317	0.000821971	yes	OK			SYK	chr9	93563985	93660842	0.0427637	1.28226	4.90615	0.000821971	yes	OK
									RASAL1	chr12	113536623	113574044	0.0735617	1.13349	3.94568	0.000821971	yes	OK			CPT1A	chr11	68522087	68609399	0.406646	10.065	4.62943	0.000821971	yes	OK			HEY2	chr6	126070731	126082415	0.282127	8.12343	4.84767	0.000821971	yes	OK
									LOC100507127	chr10	6816877	6884941	0.325953	4.87739	3.90337	0.000821971	yes	OK			ALDH1A3	chr15	101420008	101456905	0.467199	11.493	4.62057	0.000821971	yes	OK			SPINT1	chr15	41136245	41150378	4.70319	134.969	4.84285	0.000821971	yes	OK
									DACT1	chr14	59100785	59115038	0.576607	8.61654	3.90145	0.000821971	yes	OK			PDGFA	chr7	536664	559793	0.289221	7.09457	4.61647	0.000821971	yes	OK			TMEM154	chr4	153547211	153601317	0.143791	4.12371	4.84189	0.000821971	yes	OK
									MAL2	chr8	120220609	120257914	0.94057	13.9517	3.89077	0.000821971	yes	OK			ATP12A	chr13	25254548	25286590	0.071305	1.74261	4.6111	0.000821971	yes	OK			PCSK1	chr5	95726039	95768985	0.0684775	1.94179	4.82562	0.000821971	yes	OK
									GALNT6	chr12	51745652	51786350	0.558452	8.25537	3.88583	0.000821971	yes	OK			PHLDA1	chr12	76419226	76425556	0.802191	19.1317	4.57587	0.000821971	yes	OK			IFITM1	chr11	301041	320926	98.8135	2796.97	4.82301	0.000821971	yes	OK
									THBS2	chr6	169615832	169654137	2.54065	37.3183	3.87661	0.000821971	yes	OK			MRGPRF	chr11	68771766	68780850	0.433102	10.1537	4.55116	0.000821971	yes	OK			SUSD2	chr22	24577443	24585178	6.28612	177.583	4.82018	0.000821971	yes	OK
									PRKCH	chr14	61788514	62017698	0.11203	1.64341	3.87473	0.000821971	yes	OK			TMEM154	chr4	153547211	153601317	0.143791	3.30684	4.5234	0.000821971	yes	OK			KDR	chr4	55944425	55991762	0.333301	9.34169	4.80878	0.000821971	yes	OK
									IL28RA	chr1	24478069	24513765	0.126694	1.83279	3.85462	0.000821971	yes	OK			TRIM48	chr11	55029657	55039177	0.28079	6.44595	4.52083	0.000821971	yes	OK			SOX18	chr20	62679078	62680979	0.884945	24.6904	4.80222	0.000821971	yes	OK
									MARVELD3	chr16	71660069	71675868	0.760783	10.8595	3.83533	0.000821971	yes	OK			USP43	chr17	9548680	9633066	0.273875	6.22189	4.50577	0.000821971	yes	OK			MRGPRF	chr11	68771766	68780850	0.433102	11.8692	4.77638	0.000821971	yes	OK
									CRYBB1	chr22	26995243	27013991	0.994955	14.0581	3.82063	0.000821971	yes	OK			VENTX	chr10	135050295	135055659	2.8582	64.0231	4.48541	0.000821971	yes	OK			ANXA3	chr4	79472741	79531605	1.15005	30.8965	4.74767	0.000821971	yes	OK
									AP1M2	chr19	10680750	10697991	0.905848	12.6591	3.80477	0.000821971	yes	OK			IL28RA	chr1	24478069	24513765	0.126694	2.73131	4.43018	0.000821971	yes	OK			MIR1204,MIR1206,PVT1	chr8	128806536	129113541	11.3696	295.773	4.70124	0.000821971	yes	OK
									BIK	chr22	43506728	43540953	3.29887	45.8231	3.79603	0.000821971	yes	OK			IL15	chr4	142557748	142655140	0.112234	2.40815	4.42334	0.000821971	yes	OK			GRM4	chr6	33989622	34123399	0.648159	16.7308	4.69002	0.000821971	yes	OK
									CHODL	chr21	19273418	19639687	0.459099	6.35494	3.791	0.000821971	yes	OK			IFITM1	chr11	301041	320926	98.8135	2115.73	4.4203	0.000821971	yes	OK			TBX3	chr12	115108058	115121969	0.148546	3.77631	4.66799	0.000821971	yes	OK
									OVOL1	chr11	65554504	65564690	0.141236	1.95169	3.78855	0.000821971	yes	OK			MAL2	chr8	120220609	120257914	0.94057	20.0056	4.41072	0.000821971	yes	OK			SUN3	chr7	48026635	48068716	0.315889	7.76085	4.61873	0.000821971	yes	OK
									GDF3	chr12	7842380	7848360	3.04957	42.0492	3.7854	0.000821971	yes	OK			MYOZ3	chr5	150040403	150058925	0.0853755	1.78855	4.38882	0.000821971	yes	OK			ZBTB32	chr19	36203829	36208049	3.31953	81.39	4.6158	0.000821971	yes	OK
									DPPA3	chr12	7863957	7870156	0.983373	13.3388	3.76175	0.000821971	yes	OK			SUN3	chr7	48026635	48068716	0.315889	6.57329	4.37913	0.000821971	yes	OK			FBP1	chr9	97365415	97402531	0.997046	24.1947	4.60089	0.000821971	yes	OK
									VWDE	chr7	12370508	12443852	0.0850013	1.1471	3.75436	0.000821971	yes	OK			GRM4	chr6	33989622	34123399	0.648159	13.3167	4.36074	0.000821971	yes	OK			LOC100507127	chr10	6816877	6884941	0.325953	7.82168	4.58474	0.000821971	yes	OK
									DEPTOR	chr8	120885899	121063157	0.309494	4.16088	3.74891	0.000821971	yes	OK			NAPRT1	chr8	144656800	144660513	0.472772	9.52903	4.33311	0.000821971	yes	OK			MARVELD3	chr16	71660069	71675868	0.760783	18.2241	4.58222	0.000821971	yes	OK
									HIP1R	chr12	123320038	123347508	1.25748	16.6866	3.73008	0.000821971	yes	OK			THBS2	chr6	169615832	169654137	2.54065	50.9011	4.32443	0.000821971	yes	OK			WNT3	chr17	44839640	44896087	2.07698	48.9968	4.56013	0.000821971	yes	OK
									TMEM154	chr4	153547211	153601317	0.143791	1.88284	3.71086	0.000821971	yes	OK			CHODL	chr21	19273418	19639687	0.459099	9.17647	4.32106	0.000821971	yes	OK			VENTX	chr10	135050295	135055659	2.8582	65.8815	4.52669	0.000821971	yes	OK
									LMO7	chr13	76194569	76434006	0.136486	1.77092	3.69768	0.000821971	yes	OK			LRAT	chr4	155665162	155674270	0.397308	7.87503	4.30896	0.000821971	yes	OK			KCNK6	chr19	38810483	38822763	0.886141	20.3375	4.52046	0.000821971	yes	OK
									WNT5B	chr12	1726221	1756400	0.680424	8.81725	3.69582	0.000821971	yes	OK			KDR	chr4	55944425	55991762	0.333301	6.51871	4.28969	0.000821971	yes	OK			IL28RA	chr1	24478069	24513765	0.126694	2.84855	4.49081	0.000821971	yes	OK
									SUSD2	chr22	24577443	24585178	6.28612	81.3349	3.69363	0.000821971	yes	OK			RFPL2	chr22	32586421	32600718	0.276073	5.29655	4.26193	0.000821971	yes	OK			SGK1	chr6	134490383	134639196	1.54786	34.1486	4.46348	0.000821971	yes	OK
									CBLC	chr19	45281124	45305576	0.736437	9.46324	3.6837	0.000821971	yes	OK			MARVELD3	chr16	71660069	71675868	0.760783	14.314	4.2338	0.000821971	yes	OK			IL23A	chr12	56730716	56734197	1.74147	38.1852	4.45464	0.000821971	yes	OK
									ATP8A2	chr13	25946208	26599632	0.345206	4.40111	3.67234	0.000821971	yes	OK			SUSD2	chr22	24577443	24585178	6.28612	117.734	4.22722	0.000821971	yes	OK			STC2	chr5	172741725	172756506	0.401733	8.76915	4.44813	0.000821971	yes	OK
									PITX2	chr4	111538579	111563279	0.0705753	0.886734	3.65127	0.000821971	yes	OK			CBLC	chr19	45281124	45305576	0.736437	13.6387	4.211	0.000821971	yes	OK			CBLC	chr19	45281124	45305576	0.736437	15.3641	4.38286	0.000821971	yes	OK
									NAPRT1	chr8	144656800	144660513	0.472772	5.91891	3.64612	0.000821971	yes	OK			SLC27A6	chr5	128301093	128369335	0.194547	3.58115	4.20223	0.000821971	yes	OK			LRAT	chr4	155665162	155674270	0.397308	8.21517	4.36996	0.000821971	yes	OK
									DHRS3	chr1	12627938	12677820	0.565823	7.03868	3.63688	0.000821971	yes	OK			PPP1R1B	chr17	37783176	37792878	0.439434	8.04599	4.19455	0.000821971	yes	OK			EPHX3	chr19	15337729	15343858	1.2674	26.1557	4.36718	0.000821971	yes	OK
									STC2	chr5	172741725	172756506	0.401733	4.99464	3.63607	0.000821971	yes	OK			PDLIM1	chr10	96997329	97050781	5.52339	99.8002	4.17542	0.000821971	yes	OK			TEC	chr4	48137799	48271814	0.0967918	1.9891	4.36109	0.000821971	yes	OK
									EPHX3	chr19	15337729	15343858	1.2674	15.7044	3.63122	0.000821971	yes	OK			PCSK1	chr5	95726039	95768985	0.0684775	1.21842	4.15324	0.000821971	yes	OK			CHODL	chr21	19273418	19639687	0.459099	9.42193	4.35914	0.000821971	yes	OK
									SLC27A6	chr5	128301093	128369335	0.194547	2.37114	3.60739	0.000821971	yes	OK			VWDE	chr7	12370508	12443852	0.0850013	1.50426	4.14542	0.000821971	yes	OK			VRTN	chr14	74815165	74826711	0.700935	14.3025	4.35084	0.000821971	yes	OK
									PACSIN3	chr11	47198859	47208010	5.61314	67.2333	3.5823	0.000821971	yes	OK			PHLDA3	chr1	201428162	201438521	13.3101	232.171	4.12459	0.000821971	yes	OK			ALDH1A3	chr15	101420008	101456905	0.467199	9.28687	4.31308	0.000821971	yes	OK
									COMTD1	chr10	76993323	76995770	5.78683	68.4914	3.56508	0.000821971	yes	OK			IL23A	chr12	56730716	56734197	1.74147	30.3044	4.12115	0.000821971	yes	OK			IL15	chr4	142557748	142655140	0.112234	2.21712	4.3041	0.000821971	yes	OK
									FAM160A1	chr4	152330397	152584784	0.091311	1.07781	3.56117	0.000821971	yes	OK			PMAIP1	chr18	57567191	57574865	2.56431	44.0531	4.1026	0.000821971	yes	OK			OTX2	chr14	57267414	57277184	0.250972	4.89455	4.28558	0.000821971	yes	OK
									TRIM47	chr17	73870242	73874733	0.396699	4.65818	3.55365	0.000821971	yes	OK			CHST9	chr18	24432007	24765302	0.230685	3.9546	4.09953	0.000821971	yes	OK			PLXNB3	chrX	153029650	153044801	0.55727	10.7295	4.26706	0.000821971	yes	OK
									ALDH1L2	chr12	105413561	105478341	0.377632	4.38339	3.53699	0.000821971	yes	OK			AP1M2	chr19	10680750	10697991	0.905848	15.1594	4.0648	0.000821971	yes	OK			AP1M2	chr19	10680750	10697991	0.905848	17.1485	4.24267	0.000821971	yes	OK
									RRAD	chr16	66955581	66959439	0.752613	8.68548	3.52863	0.000821971	yes	OK			GALNT6	chr12	51745652	51786350	0.558452	9.24193	4.04869	0.000821971	yes	OK			SH2D3A	chr19	6752138	6767523	1.74513	32.9983	4.24098	0.000821971	yes	OK
									FAM84B	chr8	127564682	127570722	1.2109	13.4417	3.47256	0.000821971	yes	OK			CGNL1	chr15	57668702	57842925	0.111432	1.81462	4.02543	0.000821971	yes	OK			ADAMTS4	chr1	161159478	161168845	1.55707	28.231	4.18037	0.000821971	yes	OK
									SERPINB9	chr6	2887276	2903545	9.1183	100.854	3.46736	0.000821971	yes	OK			DHRS3	chr1	12627938	12677820	0.565823	8.97389	3.98731	0.000821971	yes	OK			ACP5	chr19	11685474	11689801	0.31647	5.64347	4.15644	0.000821971	yes	OK
									VENTX	chr10	135050295	135055659	2.8582	31.2814	3.45213	0.000821971	yes	OK			LMO2	chr11	33880122	33913836	0.346851	5.49278	3.98515	0.000821971	yes	OK			TRIM47	chr17	73870242	73874733	0.396699	7.05081	4.15167	0.000821971	yes	OK
									BCL11A	chr2	60678301	60780633	0.636182	6.91854	3.44296	0.000821971	yes	OK			PLA2G2A	chr1	20301923	20306932	0.348853	5.49862	3.97838	0.000821971	yes	OK			ARHGEF5	chr7	144052488	144077725	0.0753734	1.32705	4.13802	0.000821971	yes	OK
									SH2D3A	chr19	6752138	6767523	1.74513	18.937	3.4398	0.000821971	yes	OK			ALDH1L2	chr12	105413561	105478341	0.377632	5.90049	3.96578	0.000821971	yes	OK			GALNT6	chr12	51745652	51786350	0.558452	9.80694	4.1343	0.000821971	yes	OK
									CPT1A	chr11	68522087	68609399	0.406646	4.40897	3.4386	0.000821971	yes	OK			TRIM47	chr17	73870242	73874733	0.396699	6.19113	3.96409	0.000821971	yes	OK			PLK5	chr19	1524072	1535458	0.899657	15.7245	4.1275	0.000821971	yes	OK
									IFITM1	chr11	301041	320926	98.8135	1069.3	3.43582	0.000821971	yes	OK			TEC	chr4	48137799	48271814	0.0967918	1.49526	3.94937	0.000821971	yes	OK			PHLDA3	chr1	201428162	201438521	13.3101	232.162	4.12454	0.000821971	yes	OK
									PMAIP1	chr18	57567191	57574865	4.69994	50.7683	3.43321	0.000821971	yes	OK			TAC1	chr7	97361270	97369784	0.416075	6.40857	3.94509	0.000821971	yes	OK			GDF15	chr19	18496967	18499986	8.04881	139.466	4.11499	0.000821971	yes	OK
									SCGB3A2	chr5	147249340	147261814	13.9377	147.337	3.40206	0.000821971	yes	OK			CR2	chr1	207627644	207663240	0.409426	6.28758	3.94083	0.000821971	yes	OK			USP43	chr17	9548680	9633066	0.273875	4.7381	4.11272	0.000821971	yes	OK
									PSTPIP2	chr18	43563501	43652250	3.4104	35.9573	3.39827	0.000821971	yes	OK			KCNK6	chr19	38810483	38822763	0.886141	13.5334	3.93285	0.000821971	yes	OK			PDLIM1	chr10	96997329	97050781	5.52339	95.006	4.10439	0.000821971	yes	OK
									WNT3	chr17	44839640	44896087	2.07698	21.576	3.37687	0.000821971	yes	OK			SH2D3A	chr19	6752138	6767523	1.74513	26.1843	3.90729	0.000821971	yes	OK			NAPRT1	chr8	144656800	144660513	0.472772	8.06936	4.09324	0.000821971	yes	OK
									ALDH1A3	chr15	101420008	101456905	0.467199	4.79027	3.358	0.000821971	yes	OK			FAM84B	chr8	127564682	127570722	1.2109	17.8018	3.87786	0.000821971	yes	OK			ACTA1	chr1	229553682	229569843	5.03281	84.8112	4.07482	0.000821971	yes	OK
									NPY1R	chr4	164245116	164253947	0.204949	2.06537	3.33307	0.000821971	yes	OK			PAPSS2	chr10	89419374	89507523	0.320668	4.71295	3.87748	0.000821971	yes	OK			KCNK1	chr1	233749462	233808258	1.48694	24.7682	4.05807	0.000821971	yes	OK
									POU5F1B	chr8	128427856	128429441	0.482341	4.82655	3.32287	0.000821971	yes	OK			LMO7	chr13	76194569	76434006	0.136486	1.99072	3.86646	0.000821971	yes	OK			BIK	chr22	43506728	43540953	3.29887	54.9334	4.05764	0.000821971	yes	OK
									UNC13D	chr17	73823155	73840798	0.695108	6.8756	3.30617	0.000821971	yes	OK			EPHX3	chr19	15337729	15343858	1.2674	18.066	3.83333	0.000821971	yes	OK			NPPC	chr2	232786529	232791108	2.97912	48.837	4.03502	0.000821971	yes	OK
									KCNK6	chr19	38810483	38822763	0.886141	8.76325	3.30586	0.000821971	yes	OK			DDIT4L	chr4	101107026	101111655	0.130657	1.86133	3.83248	0.000821971	yes	OK			MMP9	chr20	44637546	44688789	1.99577	32.1718	4.01078	0.000821971	yes	OK
									OTX2	chr14	57267414	57277184	0.250972	2.46856	3.29807	0.000821971	yes	OK			SPP1	chr4	88896801	88904563	22.0302	313.165	3.82937	0.000821971	yes	OK			CRYBB1	chr22	26995243	27013991	0.994955	15.75	3.98457	0.000821971	yes	OK
									MUC4	chr3	195473637	195538844	0.252574	2.45997	3.28386	0.000821971	yes	OK			SGK1	chr6	134490383	134639196	1.54786	21.9538	3.82613	0.000821971	yes	OK			CA2	chr8	86376130	86393721	3.48565	52.3693	3.90922	0.000821971	yes	OK
									NIPAL1	chr4	48018790	48042150	0.246102	2.3748	3.27048	0.000821971	yes	OK			WNT3	chr17	44839640	44896087	2.07698	29.2377	3.81527	0.000821971	yes	OK			PROCR	chr20	33759773	33771344	8.60725	128.716	3.90249	0.000821971	yes	OK
									GPC4	chrX	132435063	132549205	0.98355	9.33933	3.24725	0.000821971	yes	OK			PLK5	chr19	1524072	1535458	0.899657	12.5246	3.79925	0.000821971	yes	OK			BHLHE40	chr3	5021096	5026865	0.339275	5.01494	3.8857	0.000821971	yes	OK
									CR2	chr1	207627644	207663240	0.409426	3.88398	3.24586	0.000821971	yes	OK			ATP8A2	chr13	25946208	26599632	0.345206	4.70752	3.76944	0.000821971	yes	OK			B3GNT7	chr2	232260334	232265875	0.292574	4.27325	3.86846	0.000821971	yes	OK
									OSTF1	chr9	77703382	77762444	1.44084	13.4282	3.22028	0.000821971	yes	OK			FAM160A1	chr4	152330397	152584784	0.091311	1.24384	3.76786	0.000821971	yes	OK			FAM160A1	chr4	152330397	152584784	0.091311	1.32989	3.86437	0.000821971	yes	OK
									CACNA2D1	chr7	81575661	82073118	0.500791	4.60421	3.20068	0.000821971	yes	OK			SOX18	chr20	62679078	62680979	0.884945	11.884	3.74729	0.000821971	yes	OK			ESPN	chr1	6484847	6521004	0.35812	5.12814	3.83992	0.000821971	yes	OK
									CA8	chr8	61099933	61193954	0.791725	7.13785	3.17242	0.000821971	yes	OK			ADAMTS19	chr5	128796006	129074498	0.540521	7.13692	3.72288	0.000821971	yes	OK			CGNL1	chr15	57668702	57842925	0.111432	1.54291	3.79142	0.000821971	yes	OK
									B3GNT7	chr2	232260334	232265875	0.292574	2.62783	3.167	0.000821971	yes	OK			SCGB3A2	chr5	147249340	147261814	13.9377	181.485	3.70278	0.000821971	yes	OK			SLC27A6	chr5	128301093	128369335	0.194547	2.6889	3.78882	0.000821971	yes	OK
									ZSCAN18	chr19	58595076	58629793	1.51673	13.5653	3.16089	0.000821971	yes	OK			MT1X	chr16	56716305	56719676	40.2879	497.138	3.62523	0.000821971	yes	OK			PRR15	chr7	29603425	29606983	1.26729	17.5034	3.78782	0.000821971	yes	OK
									SERPINB6	chr6	2948390	2972399	7.0207	62.3142	3.14987	0.000821971	yes	OK			ACP5	chr19	11685474	11689801	0.31647	3.89425	3.62121	0.000821971	yes	OK			SLC6A3	chr5	1392904	1445543	0.873715	11.9957	3.77921	0.000821971	yes	OK
									PHLDA3	chr1	201428162	201438521	13.3101	117.997	3.14815	0.000821971	yes	OK			PACSIN3	chr11	47198859	47208010	5.61314	68.4775	3.60875	0.000821971	yes	OK			MIR4750,TBC1D17	chr19	50372250	50392050	19.8188	266.089	3.74697	0.000821971	yes	OK
									CDH26	chr20	58533470	58588896	0.36319	3.21955	3.14806	0.000821971	yes	OK			PRR15	chr7	29603425	29606983	1.26729	15.4455	3.60736	0.000821971	yes	OK			AGPAT2	chr9	139567594	139581911	10.7133	143.348	3.74206	0.000821971	yes	OK
									FAM46B	chr1	27331510	27339333	24.8969	220.424	3.14624	0.000821971	yes	OK			HIP1R	chr12	123320038	123347508	1.25748	15.1921	3.59472	0.000821971	yes	OK			PPP1R1B	chr17	37783176	37792878	0.439434	5.71323	3.70059	0.000821971	yes	OK
									DBC1	chr9	121916109	122131739	0.454193	4.01841	3.14525	0.000821971	yes	OK			ADAMTS4	chr1	161159478	161168845	1.55707	18.742	3.58937	0.000821971	yes	OK			MT1X	chr16	56716305	56719676	40.2879	522.24	3.6963	0.000821971	yes	OK
									ANXA3	chr4	79472741	79531605	1.15005	10.1287	3.13867	0.000821971	yes	OK			ESPN	chr1	6484847	6521004	0.35812	4.26605	3.57439	0.000821971	yes	OK			DDIT4L	chr4	101107026	101111655	0.130657	1.69169	3.69461	0.000821971	yes	OK
									OSBPL10	chr3	31702316	32033228	0.459223	4.02532	3.13184	0.000821971	yes	OK			NPY1R	chr4	164245116	164253947	0.204949	2.43682	3.57166	0.000821971	yes	OK			ADAMTS19	chr5	128796006	129074498	0.540521	6.94253	3.68304	0.000821971	yes	OK
									DACT2	chr6	168707581	168720402	0.659189	5.77734	3.13164	0.000821971	yes	OK			TFPI	chr2	188328886	188419219	0.425934	5.05094	3.56785	0.000821971	yes	OK			CHST9	chr18	24432007	24765302	0.230685	2.92216	3.66304	0.000821971	yes	OK
									CHST4	chr16	71560022	71573232	0.50118	4.33756	3.11348	0.000821971	yes	OK			B3GNT7	chr2	232260334	232265875	0.292574	3.42962	3.55118	0.000821971	yes	OK			MAL2	chr8	120220609	120257914	0.94057	11.8086	3.65016	0.000821971	yes	OK
									MX1,MX2	chr21	42733949	42831142	4.81402	41.3594	3.1029	0.000821971	yes	OK			KCNK1	chr1	233749462	233808258	1.48694	17.3936	3.54814	0.000821971	yes	OK			FAM84B	chr8	127564682	127570722	1.2109	15.0887	3.63931	0.000821971	yes	OK
									PMAIP1	chr18	57567191	57574865	2.56431	22.0098	3.1015	0.000821971	yes	OK			ZBTB32	chr19	36203829	36208049	3.31953	38.6333	3.5408	0.000821971	yes	OK			CRISPLD2	chr16	84853586	84943116	1.20851	14.9942	3.63311	0.000821971	yes	OK
									RNF125	chr18	29598364	29668076	1.90063	16.3005	3.10036	0.000821971	yes	OK			PRKCH	chr14	61788514	62017698	0.11203	1.30127	3.53796	0.000821971	yes	OK			PAPSS2	chr10	89419374	89507523	0.320668	3.90418	3.60587	0.000821971	yes	OK
									BHMT	chr5	78407603	78428113	0.283547	2.43128	3.10006	0.000821971	yes	OK			POU5F1B	chr8	128427856	128429441	0.482341	5.57844	3.53174	0.000821971	yes	OK			HIP1R	chr12	123320038	123347508	1.25748	15.2833	3.60335	0.000821971	yes	OK
									EPPK1	chr8	144934021	144953038	8.06456	68.7823	3.09237	0.000821971	yes	OK			DBC1	chr9	121916109	122131739	0.454193	5.24338	3.52912	0.000821971	yes	OK			PACSIN3	chr11	47198859	47208010	5.61314	68.1932	3.60275	0.000821971	yes	OK
									INADL	chr1	62208148	62629591	0.602417	5.12394	3.08842	0.000821971	yes	OK			TBX3	chr12	115108058	115121969	0.148546	1.69874	3.51548	0.000821971	yes	OK			CR2	chr1	207627644	207663240	0.409426	4.96727	3.60078	0.000821971	yes	OK
									KLRG2	chr7	139135276	139168556	11.2767	95.625	3.08404	0.000821971	yes	OK			CRISPLD2	chr16	84853586	84943116	1.20851	13.5867	3.49089	0.000821971	yes	OK			GSTT2	chr22	24322313	24326106	0.699065	8.42399	3.591	0.000821971	yes	OK
									USP28	chr11	113668594	113746286	4.77135	40.2461	3.07638	0.000821971	yes	OK			FGF19	chr11	69513005	69519106	3.50375	39.101	3.48023	0.000821971	yes	OK			ATP8A2	chr13	25946208	26599632	0.345206	4.13652	3.58289	0.000821971	yes	OK
									VAV1	chr19	6772721	6857374	1.19182	9.98039	3.06593	0.000821971	yes	OK			DACT1	chr14	59100785	59115038	0.576607	6.37298	3.46631	0.000821971	yes	OK			SCGB3A2	chr5	147249340	147261814	13.9377	165.868	3.57297	0.000821971	yes	OK
									F2RL1	chr5	76114816	76132428	6.86372	56.2461	3.03469	0.000821971	yes	OK			BHLHE40	chr3	5021096	5026865	0.339275	3.72237	3.45569	0.000821971	yes	OK			MUC4	chr3	195473637	195538844	0.252574	2.99764	3.56905	0.000821971	yes	OK
									KDM4DL	chr11	94752068	94762686	0.157002	1.28241	3.03	0.000821971	yes	OK			CRYBB1	chr22	26995243	27013991	0.994955	10.8471	3.44654	0.000821971	yes	OK			DHRS3	chr1	12627938	12677820	0.565823	6.68513	3.56253	0.000821971	yes	OK
									GPR160	chr3	169755734	169803233	0.875165	7.06086	3.01222	0.000821971	yes	OK			BCL11A	chr2	60678301	60780633	0.636182	6.92764	3.44485	0.000821971	yes	OK			PRAP1	chr10	135160843	135166257	0.811352	9.57654	3.5611	0.000821971	yes	OK
									A4GALT	chr22	43069507	43116901	9.87431	79.2469	3.0046	0.000821971	yes	OK			SERPINB6	chr6	2948390	2972399	7.0207	73.4052	3.3862	0.000821971	yes	OK			PIM1	chr6	37137921	37146720	4.80567	56.7091	3.56077	0.000821971	yes	OK
									MBOAT1	chr6	20100934	20212670	0.210068	1.67843	2.99818	0.000821971	yes	OK			CDH26	chr20	58533470	58588896	0.36319	3.78406	3.38114	0.000821971	yes	OK			VWDE	chr7	12370508	12443852	0.0850013	0.996744	3.55166	0.000821971	yes	OK
									DPF1	chr19	38701648	38720335	0.680414	5.37304	2.98126	0.000821971	yes	OK			NPPC	chr2	232786529	232791108	2.97912	30.9333	3.3762	0.000821971	yes	OK			CRYBA4	chr22	27017927	27026657	2.93523	34.1114	3.53871	0.000821971	yes	OK
									TFPI	chr2	188328886	188419219	0.425934	3.33956	2.97096	0.000821971	yes	OK			OTX2	chr14	57267414	57277184	0.250972	2.60046	3.37317	0.000821971	yes	OK			NIPAL1	chr4	48018790	48042150	0.246102	2.84662	3.53192	0.000821971	yes	OK
									CCNA1	chr13	37005966	37017019	1.18768	9.31192	2.97093	0.000821971	yes	OK			DUSP5	chr10	112257624	112271302	2.22834	22.9342	3.36346	0.000821971	yes	OK			MX1,MX2	chr21	42733949	42831142	4.81402	55.598	3.52972	0.000821971	yes	OK
									MARVELD2	chr5	68710938	68740110	1.30117	10.1613	2.9652	0.000821971	yes	OK			MBOAT1	chr6	20100934	20212670	0.210068	2.1534	3.35768	0.000821971	yes	OK			SERPINB6	chr6	2948390	2972399	7.0207	80.9371	3.52711	0.000821971	yes	OK
									TUBB4A	chr19	6494329	6502330	63.7056	496.884	2.96342	0.000821971	yes	OK			PHF15	chr5	133861361	133918918	0.491097	5.01759	3.35292	0.000821971	yes	OK			HPN	chr19	35531409	35597208	1.83685	21.1006	3.52198	0.000821971	yes	OK
									UBASH3B	chr11	122526397	122685187	0.513618	3.99597	2.95978	0.000821971	yes	OK			PDE4C	chr19	18318770	18359010	0.182715	1.8621	3.34926	0.000821971	yes	OK			F2RL1	chr5	76114816	76132428	6.86372	78.6806	3.51895	0.000821971	yes	OK
									MARCH3	chr5	126203405	126366440	0.911552	7.08591	2.95856	0.000821971	yes	OK			PRDM14	chr8	70961296	70984078	7.50378	76.1271	3.34272	0.000821971	yes	OK			PDE4C	chr19	18318770	18359010	0.182715	2.08687	3.51367	0.000821971	yes	OK
									PDGFA	chr7	536664	559793	0.289221	2.18678	2.91856	0.000821971	yes	OK			MIR1204,MIR1206,PVT1	chr8	128806536	129113541	11.3696	114.1	3.32705	0.000821971	yes	OK			LMO7	chr13	76194569	76434006	0.136486	1.55481	3.50991	0.000821971	yes	OK
									CA2	chr8	86376130	86393721	3.48565	26.3253	2.91695	0.000821971	yes	OK			MX1,MX2	chr21	42733949	42831142	4.81402	48.3026	3.32679	0.000821971	yes	OK			DPPA2	chr3	109012633	109035364	2.28959	25.4778	3.47608	0.000821971	yes	OK
									FLVCR2	chr14	76040789	76114584	2.58888	19.2134	2.89171	0.000821971	yes	OK			VAV1	chr19	6772721	6857374	1.19182	11.9295	3.3233	0.000821971	yes	OK			EPPK1	chr8	144934021	144953038	8.06456	87.9598	3.44718	0.000821971	yes	OK
									SLC34A2	chr4	25649640	25680441	0.81294	5.97733	2.87828	0.000821971	yes	OK			PROCR	chr20	33759773	33771344	8.60725	85.8846	3.31878	0.000821971	yes	OK			DACT1	chr14	59100785	59115038	0.576607	6.16749	3.41902	0.000821971	yes	OK
									UGP2	chr2	64068097	64246569	35.8462	261.876	2.86899	0.000821971	yes	OK			RAB25	chr1	156030952	156040299	1.89735	18.6129	3.29425	0.000821971	yes	OK			ELF3	chr1	201979689	201986315	1.94078	20.697	3.41471	0.000821971	yes	OK
									FZD5	chr2	208626068	208635024	2.39566	17.459	2.86548	0.000821971	yes	OK			INPP5D	chr2	233925035	234116549	1.58578	15.5229	3.29113	0.000821971	yes	OK			AQP3	chr9	33441151	33447631	2.17027	23.0637	3.40968	0.000821971	yes	OK
									ZNF165	chr6	28046570	28057393	0.854792	6.20435	2.85963	0.000821971	yes	OK			PMAIP1	chr18	57567191	57574865	4.69994	45.7366	3.28263	0.000821971	yes	OK			COL9A3	chr20	61448311	61493176	34.6263	367.549	3.408	0.000821971	yes	OK
									DYSF	chr2	71680752	71913893	0.619405	4.48311	2.85554	0.000821971	yes	OK			MMP9	chr20	44637546	44688789	1.99577	19.2488	3.26975	0.000821971	yes	OK			VAV1	chr19	6772721	6857374	1.19182	12.5091	3.39174	0.000821971	yes	OK
									KLF5	chr13	73633141	73651676	1.63609	11.8132	2.85208	0.000821971	yes	OK			CHST8	chr19	34112860	34264416	5.51191	53.1536	3.26954	0.000821971	yes	OK			PHF15	chr5	133861361	133918918	0.491097	5.13289	3.38569	0.000821971	yes	OK
									ARSI,CAMK2A	chr5	149599053	149682525	0.651301	4.67128	2.84242	0.000821971	yes	OK			NIPAL1	chr4	48018790	48042150	0.246102	2.35593	3.25897	0.000821971	yes	OK			CNIH3	chr1	224804178	224928249	0.811875	8.47926	3.38461	0.000821971	yes	OK
									GPNMB	chr7	23286315	23314731	0.5602	3.98987	2.83233	0.000821971	yes	OK			CA2	chr8	86376130	86393721	3.48565	33.3308	3.25736	0.000821971	yes	OK			MAEL	chr1	166958518	166991447	0.298106	3.08834	3.37294	0.000821971	yes	OK
									C1orf88	chr1	111888950	111895639	0.421108	2.99741	2.83145	0.000821971	yes	OK			CHST4	chr16	71560022	71573232	0.50118	4.77903	3.25332	0.000821971	yes	OK			MBOAT1	chr6	20100934	20212670	0.210068	2.16995	3.36873	0.000821971	yes	OK
									LPAR3	chr1	85277284	85358896	0.588403	4.17034	2.82529	0.000821971	yes	OK			PIM1	chr6	37137921	37146720	4.80567	45.7602	3.25128	0.000821971	yes	OK			COMTD1	chr10	76993323	76995770	5.78683	59.5885	3.36419	0.000821971	yes	OK
									MSX2	chr5	174151574	174157902	0.19883	1.39557	2.81125	0.000821971	yes	OK			ACTG2	chr2	74120092	74146780	1.75416	16.6332	3.24521	0.000821971	yes	OK			PMAIP1	chr18	57567191	57574865	2.56431	26.3384	3.36053	0.000821971	yes	OK
									COL9A3	chr20	61448311	61493176	34.6263	242.805	2.80986	0.000821971	yes	OK			RPL39L	chr3	186838734	186899209	6.86126	65.008	3.24407	0.000821971	yes	OK			POU5F1B	chr8	128427856	128429441	0.482341	4.95354	3.36033	0.000821971	yes	OK
									RAB25	chr1	156030952	156040299	1.89735	13.2659	2.80567	0.000821971	yes	OK			EPPK1	chr8	144934021	144953038	8.06456	76.1328	3.23885	0.000821971	yes	OK			DUSP5	chr10	112257624	112271302	2.22834	22.8607	3.35883	0.000821971	yes	OK
									AGPAT2	chr9	139567594	139581911	10.7133	74.4464	2.7968	0.000821971	yes	OK			EML6	chr2	54951814	55199159	0.41956	3.91946	3.22371	0.000821971	yes	OK			UBASH3B	chr11	122526397	122685187	0.513618	5.25897	3.35601	0.000821971	yes	OK
									KCNK1	chr1	233749462	233808258	1.48694	10.1995	2.77808	0.000821971	yes	OK			COL9A3	chr20	61448311	61493176	34.6263	321.297	3.21397	0.000821971	yes	OK			CHST15	chr10	125767181	125853052	0.373554	3.72963	3.31964	0.000821971	yes	OK
									MDGA2	chr14	47308723	48144157	1.70474	11.6209	2.7691	0.000821971	yes	OK			FBLIM1	chr1	16084696	16131232	2.51636	23.2952	3.21063	0.000821971	yes	OK			LRRC8E	chr19	7953389	7966965	0.679194	6.77566	3.31847	0.000821971	yes	OK
									NEFH	chr22	29876180	29887281	5.88102	39.6663	2.75377	0.000821971	yes	OK			C19orf46	chr19	36494001	36499679	1.17611	10.851	3.20573	0.000821971	yes	OK			MMP14	chr14	23305792	23316803	0.221596	2.17653	3.29603	0.000821971	yes	OK
									VSIG10	chr12	118500542	118542339	3.47878	23.3346	2.74582	0.000821971	yes	OK			ZNF329	chr19	58637694	58662148	0.208505	1.91789	3.20136	0.000821971	yes	OK			ZSCAN18	chr19	58595076	58629793	1.51673	14.8947	3.29577	0.000821971	yes	OK
									GAS7	chr17	9813925	10101868	0.304658	2.03509	2.73983	0.000821971	yes	OK			F2RL1	chr5	76114816	76132428	6.86372	63.0302	3.19898	0.000821971	yes	OK			C19orf46	chr19	36494001	36499679	1.17611	11.5007	3.28963	0.000821971	yes	OK
									DMKN	chr19	35973819	36004561	14.8545	98.5347	2.72973	0.000821971	yes	OK			ZNF165	chr6	28046570	28057393	0.854792	7.76274	3.18292	0.000821971	yes	OK			NPY1R	chr4	164245116	164253947	0.204949	1.98349	3.27471	0.000821971	yes	OK
									CHORDC1	chr11	89933496	89956532	3.76999	24.9846	2.72841	0.000821971	yes	OK			AGPAT2	chr9	139567594	139581911	10.7133	96.7393	3.17471	0.000821971	yes	OK			KLRG2	chr7	139135276	139168556	11.2767	108.16	3.26174	0.000821971	yes	OK
									CYP2E1	chr10	135340866	135352628	1.47717	9.78711	2.72804	0.000821971	yes	OK			INADL	chr1	62208148	62629591	0.602417	5.39463	3.16269	0.000821971	yes	OK			TNFSF9	chr19	6531009	6552633	29.3598	280.806	3.25766	0.000821971	yes	OK
									C12orf35	chr12	32111452	32146761	7.29242	48.2662	2.72654	0.000821971	yes	OK			PLXNB3	chrX	153029650	153044801	0.55727	4.97838	3.15923	0.000821971	yes	OK			PYY	chr17	42030106	42081837	4.55463	43.533	3.25671	0.000821971	yes	OK
									HFE2	chr1	145411536	145417610	0.175379	1.15474	2.71903	0.000821971	yes	OK			ZFP42	chr4	188916899	188928158	9.28162	82.7631	3.15654	0.000821971	yes	OK			SOCS1	chr16	11348273	11350039	13.8608	132.285	3.25457	0.000821971	yes	OK
									ARHGAP33	chr19	36264776	36279726	2.81621	18.4457	2.71146	0.000821971	yes	OK			DPPA2	chr3	109012633	109035364	2.28959	20.3715	3.15339	0.000821971	yes	OK			ZNF165	chr6	28046570	28057393	0.854792	8.12663	3.24901	0.000821971	yes	OK
									RIPK4	chr21	43159528	43187249	1.50885	9.84454	2.70588	0.000821971	yes	OK			GDF15	chr19	18496967	18499986	8.04881	71.3009	3.14707	0.000821971	yes	OK			SERPINB9	chr6	2887276	2903545	9.1183	86.4245	3.2446	0.000821971	yes	OK
									ACOT11	chr1	55013806	55100417	0.700719	4.56573	2.70394	0.000821971	yes	OK			PRAP1	chr10	135160843	135166257	0.811352	7.16895	3.14336	0.000821971	yes	OK			SPP1	chr4	88896801	88904563	22.0302	208.77	3.24436	0.000821971	yes	OK
									RASGEF1A	chr10	43689982	43762367	2.24313	14.5862	2.70102	0.000821971	yes	OK			PITPNM2	chr12	123467981	123595038	0.799564	7.03233	3.13672	0.000821971	yes	OK			LGALS3	chr14	55595934	55612411	1.52705	14.4152	3.23877	0.000821971	yes	OK
									CHST15	chr10	125767181	125853052	0.373554	2.40435	2.68626	0.000821971	yes	OK			RASGEF1A	chr10	43689982	43762367	2.24313	19.6862	3.1336	0.000821971	yes	OK			RASGEF1A	chr10	43689982	43762367	2.24313	21.1572	3.23757	0.000821971	yes	OK
									PRDM14	chr8	70961296	70984078	7.50378	48.2829	2.68582	0.000821971	yes	OK			UNC13D	chr17	73823155	73840798	0.695108	6.03505	3.11806	0.000821971	yes	OK			C1orf88	chr1	111888950	111895639	0.421108	3.95347	3.23086	0.000821971	yes	OK
									CHST8	chr19	34112860	34264416	5.51191	34.9994	2.66671	0.000821971	yes	OK			ZSCAN18	chr19	58595076	58629793	1.51673	13.0183	3.1015	0.000821971	yes	OK			RNF125	chr18	29598364	29668076	1.90063	17.8191	3.22888	0.000821971	yes	OK
									EML6	chr2	54951814	55199159	0.41956	2.66134	2.6652	0.000821971	yes	OK			CHST15	chr10	125767181	125853052	0.373554	3.19554	3.09667	0.000821971	yes	OK			DSP,SNRNP48	chr6	7540531	7612220	3.83513	35.6863	3.21802	0.000821971	yes	OK
									PCDHB13	chr5	140593508	140596993	0.287855	1.82448	2.66407	0.000821971	yes	OK			MARVELD2	chr5	68710938	68740110	1.30117	11.1102	3.094	0.000821971	yes	OK			CDH26	chr20	58533470	58588896	0.36319	3.35107	3.20582	0.000821971	yes	OK
									LPAR1	chr9	113636053	113800365	0.344482	2.18069	2.66228	0.000821971	yes	OK			FAM46B	chr1	27331510	27339333	24.8969	211.523	3.08678	0.000821971	yes	OK			TFPI	chr2	188328886	188419219	0.425934	3.91343	3.19973	0.000821971	yes	OK
									ACOX1	chr17	73937586	74002080	1.08905	6.89145	2.66174	0.000821971	yes	OK			SMARCA2	chr9	2015341	2193624	0.53437	4.51237	3.07797	0.000821971	yes	OK			BHMT	chr5	78407603	78428113	0.283547	2.59576	3.1945	0.000821971	yes	OK
									PLXDC2	chr10	20105212	20570063	0.451538	2.84688	2.65646	0.000821971	yes	OK			PLXDC2	chr10	20105212	20570063	0.451538	3.78149	3.06604	0.000821971	yes	OK			BAMBI	chr10	28966423	28971868	6.31696	57.5584	3.18772	0.000821971	yes	OK
									MIR4442,TOP2B	chr3	25469753	25706430	31.2742	196.154	2.64894	0.000821971	yes	OK			OSBPL10	chr3	31702316	32033228	0.459223	3.82175	3.05696	0.000821971	yes	OK			MARVELD2	chr5	68710938	68740110	1.30117	11.8455	3.18646	0.000821971	yes	OK
									ESPN	chr1	6484847	6521004	0.35812	2.21988	2.63197	0.000821971	yes	OK			RNF125	chr18	29598364	29668076	1.90063	15.7361	3.04953	0.000821971	yes	OK			FGF19	chr11	69513005	69519106	3.50375	31.7384	3.17926	0.000821971	yes	OK
									DSP,SNRNP48	chr6	7540531	7612220	3.83513	23.6769	2.62614	0.000821971	yes	OK			TRIML2	chr4	189012353	189030758	3.93383	32.5329	3.04789	0.000821971	yes	OK			ZFP28	chr19	57050316	57068241	0.634366	5.70906	3.16986	0.000821971	yes	OK
									RHOV	chr15	41164411	41166487	1.52844	9.41196	2.62243	0.000821971	yes	OK			RHBDL1	chr16	725412	728270	1.54267	12.7046	3.04185	0.000821971	yes	OK			INPP5D	chr2	233925035	234116549	1.58578	14.265	3.16921	0.000821971	yes	OK
									C2CD4C	chr19	405442	409170	4.88591	29.9969	2.61811	0.000821971	yes	OK			BHMT	chr5	78407603	78428113	0.283547	2.31773	3.03105	0.000821971	yes	OK			CHST8	chr19	34112860	34264416	5.51191	48.9677	3.1512	0.000821971	yes	OK
									KRT8	chr12	53290968	53346695	76.6664	469.322	2.61391	0.000821971	yes	OK			HPN	chr19	35531409	35597208	1.83685	14.96	3.0258	0.000821971	yes	OK			C6orf223	chr6	43965012	43973694	2.84186	25.168	3.14669	0.000821971	yes	OK
									FOXO1	chr13	41129800	41240734	0.766327	4.68805	2.61295	0.000821971	yes	OK			DACT2	chr6	168707581	168720402	0.659189	5.30864	3.00958	0.000821971	yes	OK			CD7	chr17	80272745	80275480	0.870674	7.69266	3.14328	0.000821971	yes	OK
									AIM1	chr6	106959729	107018334	0.210037	1.27965	2.60704	0.000821971	yes	OK			OSTF1	chr9	77703382	77762444	1.44084	11.547	3.00253	0.000821971	yes	OK			SLC47A1	chr17	19437166	19482346	0.298333	2.59573	3.12115	0.000821971	yes	OK
									CNTNAP2	chr7	145813452	148118090	2.31907	14.1167	2.60579	0.000821971	yes	OK			MUC4	chr3	195473637	195538844	0.252574	2.01383	2.99517	0.000821971	yes	OK			DPF1	chr19	38701648	38720335	0.680414	5.90954	3.11856	0.000821971	yes	OK
									INTS4L1	chr7	64601602	64712875	1.68085	10.2078	2.60241	0.000821971	yes	OK			RBM47	chr4	40425233	40632664	2.31841	18.4823	2.99494	0.000821971	yes	OK			NEFH	chr22	29876180	29887281	5.88102	50.885	3.1131	0.000821971	yes	OK
									SPP1	chr4	88896801	88904563	22.0302	133.279	2.59689	0.000821971	yes	OK			DOCK3,MIR4787	chr3	50712354	51422395	7.05397	56.0214	2.98947	0.000821971	yes	OK			IFI30	chr19	18284578	18288927	22.7649	194.913	3.09794	0.000821971	yes	OK
									DUSP9	chrX	152907896	152916781	0.674202	4.04743	2.58576	0.000821971	yes	OK			MAEL	chr1	166958518	166991447	0.298106	2.34248	2.97414	0.000821971	yes	OK			PRDM14	chr8	70961296	70984078	7.50378	64.1482	3.09572	0.000821971	yes	OK
									MT1X	chr16	56716305	56719676	40.2879	241.789	2.58533	0.000821971	yes	OK			TGFB1I1	chr16	31483475	31489281	1.78116	13.9815	2.97262	0.000821971	yes	OK			BCL11A	chr2	60678301	60780633	0.636182	5.43855	3.09571	0.000821971	yes	OK
									EFCAB4A	chr11	827340	831993	2.9876	17.7402	2.56996	0.000821971	yes	OK			FZD5	chr2	208626068	208635024	2.39566	18.7256	2.96652	0.000821971	yes	OK			GADD45B	chr19	2476122	2478297	3.98056	34.0157	3.09516	0.000821971	yes	OK
									PPIC	chr5	122350049	122372425	3.93655	23.2871	2.56453	0.000821971	yes	OK			EFCAB4A	chr11	827340	831993	2.9876	23.3513	2.96644	0.000821971	yes	OK			RAB25	chr1	156030952	156040299	1.89735	16.1509	3.08956	0.000821971	yes	OK
									ZFP42	chr4	188916899	188928158	9.28162	54.8698	2.56356	0.000821971	yes	OK			TES	chr7	115850546	115898837	9.00476	70.3218	2.96521	0.000821971	yes	OK			PMAIP1	chr18	57567191	57574865	4.69994	40.0052	3.08947	0.000821971	yes	OK
									SGK1	chr6	134490383	134639196	1.54786	9.06606	2.5502	0.000821971	yes	OK			KLRG2	chr7	139135276	139168556	11.2767	87.924	2.96291	0.000821971	yes	OK			SPINT2	chr19	38755097	38785871	49.7151	417.147	3.0688	0.000821971	yes	OK
									SOCS1	chr16	11348273	11350039	13.8608	80.5341	2.53859	0.000821971	yes	OK			DPF1	chr19	38701648	38720335	0.680414	5.29998	2.9615	0.000821971	yes	OK			FZD5	chr2	208626068	208635024	2.39566	20.0152	3.06261	0.000821971	yes	OK
									RASSF7	chr11	560970	564698	9.86121	56.8067	2.52622	0.000821971	yes	OK			DSP,SNRNP48	chr6	7540531	7612220	3.83513	29.4713	2.94196	0.000821971	yes	OK			ZFP42	chr4	188916899	188928158	9.28162	76.1535	3.03646	0.000821971	yes	OK
									MRGPRF	chr11	68771766	68780850	0.433102	2.46956	2.51147	0.000821971	yes	OK			TNFRSF8	chr1	12123353	12204343	1.91055	14.6638	2.9402	0.000821971	yes	OK			DBC1	chr9	121916109	122131739	0.454193	3.72293	3.03506	0.000821971	yes	OK
									TBC1D23	chr3	99979685	100044248	18.1182	102.946	2.50638	0.000821971	yes	OK			UBASH3B	chr11	122526397	122685187	0.513618	3.90174	2.92535	0.000821971	yes	OK			PPP1R13B	chr14	104200087	104313927	0.405847	3.32316	3.03355	0.000821971	yes	OK
									TMEM51	chr1	15479027	15546976	2.89576	16.3554	2.49775	0.000821971	yes	OK			DYSF	chr2	71680752	71913893	0.619405	4.69036	2.92074	0.000821971	yes	OK			DHDH	chr19	49436914	49448227	1.28055	10.4578	3.02974	0.000821971	yes	OK
									PIM1	chr6	37137921	37146720	4.80567	27.0996	2.49546	0.000821971	yes	OK			MMP14	chr14	23305792	23316803	0.221596	1.65908	2.90438	0.000821971	yes	OK			FAM46B	chr1	27331510	27339333	24.8969	203.019	3.02757	0.000821971	yes	OK
									PHF15	chr5	133861361	133918918	0.491097	2.71881	2.46889	0.000821971	yes	OK			CYP2E1	chr10	135340866	135352628	1.47717	10.9845	2.89456	0.000821971	yes	OK			APOBEC3A,APOBEC3B,APOBEC3C,APOBEC3D,APOBEC3F,APOBEC3G	chr22	39353526	39483748	11.8918	96.1483	3.0153	0.000821971	yes	OK
									HPN	chr19	35531409	35597208	1.83685	10.1551	2.4669	0.000821971	yes	OK			VSIG10	chr12	118500542	118542339	3.47878	25.8447	2.89322	0.000821971	yes	OK			DACT2	chr6	168707581	168720402	0.659189	5.32638	3.01439	0.000821971	yes	OK
									ELOVL7	chr5	60047615	60140101	0.225197	1.23568	2.45605	0.000821971	yes	OK			DUSP9	chrX	152907896	152916781	0.674202	4.99768	2.89001	0.000821971	yes	OK			THBS2	chr6	169615832	169654137	2.54065	20.4868	3.01142	0.000821971	yes	OK
									C19orf46	chr19	36494001	36499679	1.17611	6.42204	2.44901	0.000821971	yes	OK			COMTD1	chr10	76993323	76995770	5.78683	42.8342	2.88792	0.000821971	yes	OK			SERPINE2	chr2	224839764	224904036	20.4001	164.075	3.00771	0.000821971	yes	OK
									PPP1R1B	chr17	37783176	37792878	0.439434	2.38964	2.44308	0.000821971	yes	OK			SLC16A10	chr6	111408704	111546640	4.99768	36.8299	2.88155	0.000821971	yes	OK			RIPK4	chr21	43159528	43187249	1.50885	12.0931	3.00266	0.000821971	yes	OK
									PDGFRA	chr4	55095263	55164412	0.34989	1.88453	2.42923	0.000821971	yes	OK			PPIC	chr5	122350049	122372425	3.93655	28.6711	2.86459	0.000821971	yes	OK			OSTF1	chr9	77703382	77762444	1.44084	11.4792	2.99404	0.000821971	yes	OK
									INPP5D	chr2	233925035	234116549	1.58578	8.43784	2.41168	0.000821971	yes	OK			TMEM63A	chr1	225997796	226070649	3.36783	24.4847	2.86199	0.000821971	yes	OK			PITPNM2	chr12	123467981	123595038	0.799564	6.36815	2.99359	0.000821971	yes	OK
									NPPC	chr2	232786529	232791108	2.97912	15.8517	2.41168	0.000821971	yes	OK			KRT8	chr12	53290968	53346695	76.6664	555.931	2.85824	0.000821971	yes	OK			DUSP9	chrX	152907896	152916781	0.674202	5.36528	2.9924	0.000821971	yes	OK
									RBM47	chr4	40425233	40632664	2.31841	12.3316	2.41115	0.000821971	yes	OK			NEFH	chr22	29876180	29887281	5.88102	42.6311	2.85777	0.000821971	yes	OK			LAMC3	chr9	133884503	133968447	2.49989	19.7238	2.98	0.000821971	yes	OK
									SLC16A10	chr6	111408704	111546640	4.99768	26.5466	2.4092	0.000821971	yes	OK			ZFP28	chr19	57050316	57068241	0.634366	4.57607	2.85072	0.000821971	yes	OK			TMCO4	chr1	20008705	20126410	0.330446	2.60627	2.9795	0.000821971	yes	OK
									PLSCR1,PLSCR2	chr3	146151074	146262628	8.28463	43.7282	2.40005	0.000821971	yes	OK			LPAR3	chr1	85277284	85358896	0.588403	4.22896	2.84543	0.000821971	yes	OK			TRIML2	chr4	189012353	189030758	3.93383	30.9284	2.97492	0.000821971	yes	OK
									PPP1R3B	chr8	8993763	9009152	2.16371	11.3902	2.39622	0.000821971	yes	OK			LGALS3	chr14	55595934	55612411	1.52705	10.941	2.84093	0.000821971	yes	OK			INADL	chr1	62208148	62629591	0.602417	4.72757	2.97226	0.000821971	yes	OK
									SPINT2	chr19	38755097	38785871	49.7151	260.953	2.39204	0.000821971	yes	OK			GPC4	chrX	132435063	132549205	0.98355	6.99065	2.82936	0.000821971	yes	OK			UNC13D	chr17	73823155	73840798	0.695108	5.43269	2.96636	0.000821971	yes	OK
									ZNF114	chr19	48766403	48791286	1.96994	10.2388	2.37782	0.000821971	yes	OK			RIPK4	chr21	43159528	43187249	1.50885	10.6917	2.82497	0.000821971	yes	OK			TMEM171	chr5	72416387	72427644	0.818209	6.37754	2.96246	0.000821971	yes	OK
									MFAP3L	chr4	170907746	170948319	0.870264	4.51198	2.37423	0.000821971	yes	OK			LRRC8E	chr19	7953389	7966965	0.679194	4.76328	2.81006	0.000821971	yes	OK			ZNF329	chr19	58637694	58662148	0.208505	1.61271	2.95133	0.000821971	yes	OK
									UPP1	chr7	48128354	48148330	11.4383	59.156	2.37065	0.000821971	yes	OK			CACNA2D1	chr7	81575661	82073118	0.500791	3.48559	2.79912	0.000821971	yes	OK			MSX2	chr5	174151574	174157902	0.19883	1.53673	2.95026	0.000821971	yes	OK
									RPL39L	chr3	186838734	186899209	6.86126	35.2742	2.36207	0.000821971	yes	OK			FBLN5	chr14	92335754	92414046	0.189488	1.31852	2.79874	0.000821971	yes	OK			PPP1R14A	chr19	38741876	38747231	21.222	162.583	2.93755	0.000821971	yes	OK
									MT1A,MT1DP,MT1E,MT1F,MT1H,MT1JP,MT2A	chr16	56642468	56705048	34.0481	174.983	2.36157	0.000821971	yes	OK			SLC6A3	chr5	1392904	1445543	0.873715	6.07393	2.7974	0.000821971	yes	OK			EML6	chr2	54951814	55199159	0.41956	3.20263	2.93231	0.000821971	yes	OK
									CNKSR1	chr1	26503980	26516379	1.17234	6.00043	2.35568	0.000821971	yes	OK			TAGLN2	chr1	159887841	159895365	100.592	696.464	2.79154	0.000821971	yes	OK			ACOT11	chr1	55013806	55100417	0.700719	5.30124	2.91942	0.000821971	yes	OK
									LBH	chr2	30454396	30482899	1.73106	8.84407	2.35306	0.000821971	yes	OK			SLC47A1	chr17	19437166	19482346	0.298333	2.06277	2.78959	0.000821971	yes	OK			FBLIM1	chr1	16084696	16131232	2.51636	18.8294	2.90358	0.000821971	yes	OK
									HERC5,HERC6	chr4	89299890	89427320	2.66851	13.6018	2.34969	0.000821971	yes	OK			C10orf82	chr10	118421723	118429754	0.896196	6.18832	2.78766	0.000821971	yes	OK			PRDM1	chr6	106534194	106557814	0.661037	4.90496	2.89144	0.000821971	yes	OK
									GCNT2	chr6	10521567	10630094	3.63548	18.5142	2.34842	0.000821971	yes	OK			MT1A,MT1DP,MT1E,MT1F,MT1H,MT1JP,MT2A	chr16	56642468	56705048	34.0481	233.589	2.77833	0.000821971	yes	OK			SLC16A10	chr6	111408704	111546640	4.99768	36.3682	2.86335	0.000821971	yes	OK
									PLEKHG6	chr12	6419601	6437744	0.828702	4.18797	2.33732	0.000821971	yes	OK			PPP1R13B	chr14	104200087	104313927	0.405847	2.76431	2.76791	0.000821971	yes	OK			RPL39L	chr3	186838734	186899209	6.86126	49.7815	2.85906	0.000821971	yes	OK
									MIR4724,RAB11FIP4	chr17	29718641	29865232	1.91082	9.65486	2.33707	0.000821971	yes	OK			C1orf88	chr1	111888950	111895639	0.421108	2.85693	2.7622	0.000821971	yes	OK			OSBPL10	chr3	31702316	32033228	0.459223	3.32921	2.85791	0.000821971	yes	OK
									EFHD1	chr2	233470766	233552053	2.17157	10.9362	2.3323	0.000821971	yes	OK			CD7	chr17	80272745	80275480	0.870674	5.88234	2.75619	0.000821971	yes	OK			VSIG10	chr12	118500542	118542339	3.47878	25.1735	2.85526	0.000821971	yes	OK
									DPPA2	chr3	109012633	109035364	2.28959	11.5126	2.33005	0.000821971	yes	OK			USP28	chr11	113668594	113746286	4.77135	31.6322	2.72893	0.000821971	yes	OK			NRG1	chr8	31497267	32622558	0.874906	6.32876	2.85472	0.000821971	yes	OK
									RET	chr10	43572516	43625797	1.09391	5.49411	2.32839	0.000821971	yes	OK			PPP1R14A	chr19	38741876	38747231	21.222	139.971	2.72149	0.000821971	yes	OK			CYP2E1	chr10	135340866	135352628	1.47717	10.6573	2.85093	0.000821971	yes	OK
									DUSP10	chr1	221874763	221915516	1.40241	7.03479	2.3266	0.000821971	yes	OK			SPINT2	chr19	38755097	38785871	49.7151	322.985	2.69971	0.000821971	yes	OK			FLVCR2	chr14	76040789	76114584	2.58888	18.6525	2.84897	0.000821971	yes	OK
									FOXH1	chr8	145691737	145701718	18.4023	92.0219	2.32209	0.000821971	yes	OK			LCP1	chr13	46700053	46756459	0.747051	4.78871	2.68036	0.000821971	yes	OK			TRIM29	chr11	119981993	120008863	0.282988	2.01738	2.83367	0.000821971	yes	OK
									SMPDL3B	chr1	28261503	28285806	2.11135	10.4952	2.3135	0.000821971	yes	OK			ARHGAP33	chr19	36264776	36279726	2.81621	17.7033	2.65219	0.000821971	yes	OK			A4GALT	chr22	43069507	43116901	9.87431	69.8449	2.8224	0.000821971	yes	OK
									TRMT61B	chr2	29033699	29093411	14.3293	70.0699	2.28982	0.000821971	yes	OK			PTPRCAP	chr11	67202980	67205153	1.42395	8.94747	2.65159	0.000821971	yes	OK			ESCO2	chr8	27632057	27666032	5.07591	35.6786	2.81332	0.000821971	yes	OK
									PRDM1	chr6	106534194	106557814	0.661037	3.20029	2.2754	0.000821971	yes	OK			PDGFRA	chr4	55095263	55164412	0.34989	2.19837	2.65146	0.000821971	yes	OK			ISG15	chr1	948846	949922	26.3417	184.868	2.81108	0.000821971	yes	OK
									PROCR	chr20	33759773	33771344	8.60725	41.6619	2.27511	0.000821971	yes	OK			ARSI,CAMK2A	chr5	149599053	149682525	0.651301	4.0282	2.62874	0.000821971	yes	OK			RHBDL1	chr16	725412	728270	1.54267	10.7706	2.8036	0.000821971	yes	OK
									MRM1	chr17	34958019	34976114	3.57359	17.2338	2.2698	0.000821971	yes	OK			MDGA2	chr14	47308723	48144157	1.70474	10.5257	2.62629	0.000821971	yes	OK			RAB20	chr13	111175412	111214071	1.57957	10.9019	2.78698	0.000821971	yes	OK
									PPM1H	chr12	63037761	63328918	1.63311	7.7592	2.24828	0.000821971	yes	OK			FHDC1	chr4	153864134	153900848	0.236482	1.45759	2.62379	0.000821971	yes	OK			CNKSR1	chr1	26503980	26516379	1.17234	8.06987	2.78316	0.000821971	yes	OK
									NQO2	chr6	3000066	3023018	29.7484	140.661	2.24134	0.000821971	yes	OK			CHST2	chr3	142838617	142842856	11.472	70.7084	2.62377	0.000821971	yes	OK			TAGLN2	chr1	159887841	159895365	100.592	692.072	2.78241	0.000821971	yes	OK
									AGL	chr1	100315386	100389623	6.00415	28.375	2.24059	0.000821971	yes	OK			APOBEC3A,APOBEC3B,APOBEC3C,APOBEC3D,APOBEC3F,APOBEC3G	chr22	39353526	39483748	11.8918	72.9956	2.61784	0.000821971	yes	OK			ARHGAP33	chr19	36264776	36279726	2.81621	19.2646	2.77413	0.000821971	yes	OK
									C4orf32	chr4	113066552	113111687	0.590872	2.78534	2.23694	0.000821971	yes	OK			LPAR1	chr9	113636053	113800365	0.344482	2.09774	2.60633	0.000821971	yes	OK			PTPRCAP	chr11	67202980	67205153	1.42395	9.70597	2.76898	0.000821971	yes	OK
									RHOF	chr12	122150657	122231870	7.66778	35.5055	2.21116	0.000821971	yes	OK			PTPRN	chr2	220154342	220174295	0.841372	5.11261	2.60325	0.000821971	yes	OK			ACOX1	chr17	73937586	74002080	1.08905	7.4035	2.76513	0.000821971	yes	OK
									KDR	chr4	55944425	55991762	0.333301	1.5315	2.20004	0.000821971	yes	OK			LAMC3	chr9	133884503	133968447	2.49989	15.1639	2.60071	0.000821971	yes	OK			TNFRSF8	chr1	12123353	12204343	1.91055	12.9774	2.76394	0.000821971	yes	OK
									PDE4C	chr19	18318770	18359010	0.182715	0.837426	2.19636	0.000821971	yes	OK			AQP3	chr9	33441151	33447631	2.17027	13.1555	2.59972	0.000821971	yes	OK			GPC4	chrX	132435063	132549205	0.98355	6.67996	2.76377	0.000821971	yes	OK
									PPP1R13B	chr14	104200087	104313927	0.405847	1.85934	2.19578	0.000821971	yes	OK			SOCS1	chr16	11348273	11350039	13.8608	83.9323	2.59822	0.000821971	yes	OK			CACNA2D1	chr7	81575661	82073118	0.500791	3.39564	2.7614	0.000821971	yes	OK
									CACNA2D3,ESRG	chr3	54156692	55108584	28.6968	131.248	2.19334	0.000821971	yes	OK			MCOLN3	chr1	85483764	85514223	0.179211	1.08434	2.59709	0.000821971	yes	OK			SERPINE1	chr7	100770378	100782547	3.71686	25.086	2.75472	0.000821971	yes	OK
									SIGIRR	chr11	405711	417397	8.65066	39.3826	2.18668	0.000821971	yes	OK			PLEKHG6	chr12	6419601	6437744	0.828702	5.01312	2.59678	0.000821971	yes	OK			EFCAB4A	chr11	827340	831993	2.9876	20.0363	2.74556	0.000821971	yes	OK
									RCAN3	chr1	24822822	24863868	2.94619	13.3835	2.18353	0.000821971	yes	OK			LIF	chr22	30636441	30642796	0.288903	1.74289	2.59282	0.000821971	yes	OK			PHOSPHO1	chr17	47300723	47308128	0.657939	4.39467	2.73973	0.000821971	yes	OK
									MRS2	chr6	24403083	24427130	27.9804	127.061	2.18303	0.000821971	yes	OK			ARRB1	chr11	74971165	75062951	1.31155	7.8146	2.5749	0.000821971	yes	OK			CEBPA	chr19	33790839	33793430	2.31535	15.4129	2.73483	0.000821971	yes	OK
									SPINK2	chr4	57675881	57687893	4.78974	21.5358	2.16872	0.000821971	yes	OK			ELF3	chr1	201979689	201986315	1.94078	11.5586	2.57425	0.000821971	yes	OK			LPAR1	chr9	113636053	113800365	0.344482	2.28858	2.73195	0.000821971	yes	OK
									CGN	chr1	151483861	151511170	7.30894	32.8563	2.16844	0.000821971	yes	OK			PCSK9	chr1	55505148	55530615	36.9522	219.901	2.57312	0.000821971	yes	OK			TAC1	chr7	97361270	97369784	0.416075	2.75694	2.72816	0.000821971	yes	OK
									CABLES1	chr18	20714527	20840434	0.418216	1.87892	2.16758	0.000821971	yes	OK			UGP2	chr2	64068097	64246569	35.8462	210.972	2.55716	0.000821971	yes	OK			HNF4A	chr20	42984440	43060030	0.529973	3.49333	2.72061	0.000821971	yes	OK
									PTPRU	chr1	29563027	29653325	11.2759	50.3172	2.15781	0.000821971	yes	OK			BAMBI	chr10	28966423	28971868	6.31696	37.13	2.55528	0.000821971	yes	OK			CHST2	chr3	142838617	142842856	11.472	75.5746	2.71979	0.000821971	yes	OK
									EPB41L4B	chr9	111934253	112083021	1.0898	4.83622	2.14982	0.000821971	yes	OK			CNIH3	chr1	224804178	224928249	0.811875	4.75857	2.5512	0.000821971	yes	OK			RHOV	chr15	41164411	41166487	1.52844	10.0389	2.71547	0.000821971	yes	OK
									TAGLN2	chr1	159887841	159895365	100.592	446.315	2.14955	0.000821971	yes	OK			CNKSR1	chr1	26503980	26516379	1.17234	6.86994	2.55091	0.000821971	yes	OK			TUBB4A	chr19	6494329	6502330	63.7056	415.048	2.70379	0.000821971	yes	OK
									SLC25A16	chr10	70239480	70287284	4.62467	20.4302	2.14328	0.000821971	yes	OK			GADD45B	chr19	2476122	2478297	3.98056	23.1868	2.54226	0.000821971	yes	OK			PMEPA1	chr20	56223447	56286921	1.6748	10.8928	2.70131	0.000821971	yes	OK
									PPP1R14A	chr19	38741876	38747231	21.222	93.4749	2.13902	0.000821971	yes	OK			WWTR1	chr3	149235021	149421060	1.25318	7.27929	2.5382	0.000821971	yes	OK			TES	chr7	115850546	115898837	9.00476	58.2262	2.69291	0.000821971	yes	OK
									HRASLS5	chr11	63014620	63330855	3.01515	13.2788	2.13882	0.000821971	yes	OK			SERPINB9	chr6	2887276	2903545	9.1183	52.9479	2.53774	0.000821971	yes	OK			LCP1	chr13	46700053	46756459	0.747051	4.77752	2.67698	0.000821971	yes	OK
									NRG1	chr8	31497267	32622558	0.874906	3.84214	2.13471	0.000821971	yes	OK			PRDM1	chr6	106534194	106557814	0.661037	3.83556	2.53664	0.000821971	yes	OK			SMARCA2	chr9	2015341	2193624	0.53437	3.40587	2.67211	0.000821971	yes	OK
									ARHGAP42,TMEM133	chr11	100557918	100864666	1.2132	5.28335	2.12264	0.000821971	yes	OK			C12orf35	chr12	32111452	32146761	7.29242	42.3083	2.53647	0.000821971	yes	OK			FBLN5	chr14	92335754	92414046	0.189488	1.20542	2.66935	0.000821971	yes	OK
									COL14A1	chr8	121137351	121384273	0.345644	1.50407	2.12151	0.000821971	yes	OK			PCNXL2	chr1	233117413	233431461	3.66341	21.2384	2.53542	0.000821971	yes	OK			SIGIRR	chr11	405711	417397	8.65066	54.4958	2.65526	0.000821971	yes	OK
									JDP2	chr14	75894508	75939404	0.555407	2.41184	2.11852	0.000821971	yes	OK			DMKN	chr19	35973819	36004561	14.8545	85.7667	2.52952	0.000821971	yes	OK			FOXH1	chr8	145691737	145701718	18.4023	115.07	2.64455	0.000821971	yes	OK
									HSPA4L	chr4	128703392	128755364	0.994052	4.29419	2.11099	0.000821971	yes	OK			SLC4A11	chr20	3207905	3221619	9.55001	54.7867	2.52025	0.000821971	yes	OK			ZNF296	chr19	45574757	45579688	14.3581	89.0736	2.63313	0.000821971	yes	OK
									UTF1	chr10	135042846	135045269	154.974	666.232	2.104	0.000821971	yes	OK			ELOVL7	chr5	60047615	60140101	0.225197	1.27243	2.49833	0.000821971	yes	OK			CGN	chr1	151483861	151511170	7.30894	45.1604	2.62732	0.000821971	yes	OK
									KIAA1161	chr9	34366687	34376894	0.739874	3.15202	2.09093	0.000821971	yes	OK			ISG15	chr1	948846	949922	26.3417	147.451	2.48481	0.000821971	yes	OK			DYSF	chr2	71680752	71913893	0.619405	3.82316	2.62581	0.000821971	yes	OK
									CCDC3	chr10	12938624	13043704	1.1254	4.77412	2.0848	0.000821971	yes	OK			SERPINE2	chr2	224839764	224904036	20.4001	112.24	2.45994	0.000821971	yes	OK			LPAR3	chr1	85277284	85358896	0.588403	3.63025	2.62519	0.000821971	yes	OK
									TES	chr7	115850546	115898837	9.00476	38.1074	2.08131	0.000821971	yes	OK			UPP1	chr7	48128354	48148330	11.4383	62.5176	2.45039	0.000821971	yes	OK			FN1	chr2	216225178	216312544	6.97303	42.8965	2.621	0.000821971	yes	OK
									PRSS16	chr6	27215501	27224399	0.688303	2.9127	2.08124	0.000821971	yes	OK			RHOV	chr15	41164411	41166487	1.52844	8.31605	2.44384	0.000821971	yes	OK			PLEKHG6	chr12	6419601	6437744	0.828702	5.09377	2.61981	0.000821971	yes	OK
									PMEPA1	chr20	56223447	56286921	1.6748	7.06658	2.07703	0.000821971	yes	OK			NQO1	chr16	69740145	69760533	6.62304	36.0093	2.44281	0.000821971	yes	OK			ACTN2	chr1	236849769	236927558	1.20854	7.39764	2.61379	0.000821971	yes	OK
									PCSK5	chr9	78505559	78977255	1.76401	7.40101	2.06886	0.000821971	yes	OK			LBH	chr2	30454396	30482899	1.73106	9.39865	2.4408	0.000821971	yes	OK			SLC4A11	chr20	3207905	3221619	9.55001	58.3102	2.61017	0.000821971	yes	OK
									ZNF850	chr19	37234289	37263716	0.866422	3.60897	2.05845	0.000821971	yes	OK			TUBB4A	chr19	6494329	6502330	63.7056	345.556	2.43943	0.000821971	yes	OK			C12orf35	chr12	32111452	32146761	7.29242	44.496	2.60921	0.000821971	yes	OK
									GRM4	chr6	33989622	34123399	0.648159	2.68302	2.04944	0.000821971	yes	OK			TNFSF9	chr19	6531009	6552633	8.46434	45.8508	2.43748	0.000821971	yes	OK			CBR1	chr21	37441939	37498938	46.1199	281.309	2.60869	0.000821971	yes	OK
									GRHL1	chr2	10091791	10142449	0.771811	3.18542	2.04516	0.000821971	yes	OK			DEPTOR	chr8	120885899	121063157	0.309494	1.67185	2.43346	0.000821971	yes	OK			ZNF114	chr19	48766403	48791286	1.96994	11.9995	2.60675	0.000821971	yes	OK
									SPTLC2	chr14	77972339	78083110	4.65946	19.0164	2.02901	0.000821971	yes	OK			MFAP3L	chr4	170907746	170948319	0.870264	4.70034	2.43324	0.000821971	yes	OK			ARRB1	chr11	74971165	75062951	1.31155	7.80815	2.57371	0.000821971	yes	OK
									BMP7	chr20	55743808	55841719	2.75076	11.1822	2.0233	0.000821971	yes	OK			FLVCR2	chr14	76040789	76114584	2.58888	13.8488	2.41937	0.000821971	yes	OK			PCNXL2	chr1	233117413	233431461	3.66341	21.8055	2.57343	0.000821971	yes	OK
									PHKA1	chrX	71798663	71934203	4.18434	16.9645	2.01945	0.000821971	yes	OK			PCP4L1	chr1	161228516	161255240	1.55728	8.32548	2.41851	0.000821971	yes	OK			MFAP3L	chr4	170907746	170948319	0.870264	5.14993	2.56503	0.000821971	yes	OK
									CAPG	chr2	85620717	85641197	24.3698	97.9185	2.00649	0.000821971	yes	OK			PMEPA1	chr20	56223447	56286921	1.6748	8.94643	2.41733	0.000821971	yes	OK			TMEM63A	chr1	225997796	226070649	3.36783	19.8093	2.55629	0.000821971	yes	OK
									NEFL	chr8	24803839	24814255	39.4826	158.092	2.00147	0.000821971	yes	OK			FOXH1	chr8	145691737	145701718	18.4023	97.4369	2.40458	0.000821971	yes	OK			PPIC	chr5	122350049	122372425	3.93655	23.148	2.55588	0.000821971	yes	OK
									JPH1	chr8	75146936	75233742	0.970769	3.85542	1.98969	0.000821971	yes	OK			GPR160	chr3	169755734	169803233	0.875165	4.63116	2.40375	0.000821971	yes	OK			SFN	chr1	27189583	27200868	18.8943	110.128	2.54316	0.000821971	yes	OK
									MLKL	chr16	74705752	74734789	0.850929	3.37371	1.98722	0.000821971	yes	OK			HRASLS5	chr11	63014620	63330855	3.01515	15.7937	2.38905	0.000821971	yes	OK			LIF	chr22	30636441	30642796	0.288903	1.67739	2.53756	0.000821971	yes	OK
									FAM63B	chr15	59063278	59154101	3.4876	13.7548	1.97963	0.000821971	yes	OK			ZNF850	chr19	37234289	37263716	0.866422	4.53835	2.38902	0.000821971	yes	OK			CA8	chr8	61099933	61193954	0.791725	4.59305	2.53638	0.000821971	yes	OK
									HSPH1	chr13	31709187	31736323	16.4739	64.6008	1.97137	0.000821971	yes	OK			AIM1	chr6	106959729	107018334	0.210037	1.09328	2.37995	0.000821971	yes	OK			ADAM8	chr10	135075919	135090407	1.51671	8.77391	2.53227	0.000821971	yes	OK
									FRAT2	chr10	99092136	99102961	91.8737	357.525	1.96032	0.000821971	yes	OK			JDP2	chr14	75894508	75939404	0.555407	2.8855	2.3772	0.000821971	yes	OK			TPTE	chr21	10906742	10990920	1.0554	6.09572	2.53001	0.000821971	yes	OK
									EDIL3	chr5	83236379	83680611	1.2107	4.69886	1.95646	0.000821971	yes	OK			C16orf74	chr16	85741021	85784689	3.23058	16.6856	2.36874	0.000821971	yes	OK			SETD1B	chr12	122241986	122270562	1.05748	6.05944	2.51855	0.000821971	yes	OK
									ARRB1	chr11	74971165	75062951	1.31155	5.08199	1.95413	0.000821971	yes	OK			TPTE	chr21	10906742	10990920	1.0554	5.45056	2.36862	0.000821971	yes	OK			DMKN	chr19	35973819	36004561	14.8545	84.9288	2.51536	0.000821971	yes	OK
									EZR	chr6	159186772	159240456	74.9795	289.919	1.95108	0.000821971	yes	OK			ACOT11	chr1	55013806	55100417	0.700719	3.60433	2.36282	0.000821971	yes	OK			MCOLN3	chr1	85483764	85514223	0.179211	1.02451	2.5152	0.000821971	yes	OK
									WNT11	chr11	75897367	75917574	1.0107	3.89412	1.94594	0.000821971	yes	OK			HERC5,HERC6	chr4	89299890	89427320	2.66851	13.6984	2.3599	0.000821971	yes	OK			UPP1	chr7	48128354	48148330	11.4383	64.7061	2.50003	0.000821971	yes	OK
									CCRN4L	chr4	139936902	139968217	1.16797	4.49895	1.94559	0.000821971	yes	OK			EDIL3	chr5	83236379	83680611	1.2107	6.15605	2.34616	0.000821971	yes	OK			UTF1	chr10	135042846	135045269	154.974	875.376	2.49788	0.000821971	yes	OK
									REST	chr4	57773908	57802013	9.68049	37.2056	1.94237	0.000821971	yes	OK			ITGB5	chr3	124480700	124606575	18.9956	96.5721	2.34594	0.000821971	yes	OK			PTPRN	chr2	220154342	220174295	0.841372	4.74698	2.49619	0.000821971	yes	OK
									RPRM	chr2	154333851	154335322	10.9873	41.7693	1.9266	0.000821971	yes	OK			ANKRD45	chr1	173577474	173653026	0.97679	4.95196	2.34188	0.000821971	yes	OK			ELOVL7	chr5	60047615	60140101	0.225197	1.26708	2.49225	0.000821971	yes	OK
									IFI30	chr19	18284578	18288927	22.7649	86.316	1.92281	0.000821971	yes	OK			EPB41L4B	chr9	111934253	112083021	1.0898	5.4963	2.3344	0.000821971	yes	OK			PCP4L1	chr1	161228516	161255240	1.55728	8.73494	2.48777	0.000821971	yes	OK
									GCH1	chr14	55308723	55369542	2.12993	8.05039	1.91825	0.000821971	yes	OK			CARD11	chr7	2932978	3083509	1.27066	6.38439	2.32897	0.000821971	yes	OK			ANXA1	chr9	75766780	75785307	3.96719	22.233	2.48652	0.000821971	yes	OK
									CD2AP	chr6	47444783	47594996	2.96868	11.1741	1.91227	0.000821971	yes	OK			CAPG	chr2	85620717	85641197	24.3698	122.262	2.32681	0.000821971	yes	OK			RBM47	chr4	40425233	40632664	2.31841	12.9789	2.48496	0.000821971	yes	OK
									PITPNC1	chr17	65373398	65689647	11.3209	42.5034	1.90859	0.000821971	yes	OK			IFI30	chr19	18284578	18288927	22.7649	114.057	2.32487	0.000821971	yes	OK			FAM43A	chr3	194406621	194409766	1.08007	6.00685	2.47548	0.000821971	yes	OK
									SOCS3	chr17	76352858	76356158	3.8113	14.2266	1.90024	0.000821971	yes	OK			A4GALT	chr22	43069507	43116901	9.87431	49.4346	2.32377	0.000821971	yes	OK			FHDC1	chr4	153864134	153900848	0.236482	1.30891	2.46857	0.000821971	yes	OK
									TNS3	chr7	47314665	47621742	3.53358	13.182	1.89937	0.000821971	yes	OK			HPSE	chr4	84213613	84256306	0.232674	1.16132	2.31938	0.000821971	yes	OK			CD109	chr6	74405507	74538041	1.68015	9.22535	2.45702	0.000821971	yes	OK
									HSPA8	chr11	122928127	122932901	166.275	618.911	1.89616	0.000821971	yes	OK			TRNP1	chr1	27320181	27328027	4.99485	24.9186	2.31871	0.000821971	yes	OK			LBH	chr2	30454396	30482899	1.73106	9.48663	2.45424	0.000821971	yes	OK
									NLRP2	chr19	55476651	55512601	60.0744	223.516	1.89555	0.000821971	yes	OK			DUSP10	chr1	221874763	221915516	1.40241	6.95881	2.31093	0.000821971	yes	OK			CCRN4L	chr4	139936902	139968217	1.16797	6.38501	2.45069	0.000821971	yes	OK
									IBTK	chr6	82879840	82957530	2.25845	8.39868	1.89483	0.000821971	yes	OK			EZR	chr6	159186772	159240456	74.9795	371.148	2.30743	0.000821971	yes	OK			GALNT8	chr12	4829640	4913114	0.49168	2.67232	2.4423	0.000821971	yes	OK
									ELF3	chr1	201979689	201986315	1.94078	7.18639	1.88863	0.000821971	yes	OK			SPINK2	chr4	57675881	57687893	4.78974	23.6016	2.30087	0.000821971	yes	OK			LYPD3	chr19	43964945	43969831	1.64006	8.88613	2.43781	0.000821971	yes	OK
									IL34	chr16	70613797	70694639	4.07204	15.0432	1.88529	0.000821971	yes	OK			PTH1R	chr3	46919235	46945289	2.86328	14.084	2.29832	0.000821971	yes	OK			SCAPER	chr15	76640444	77176217	2.59011	13.8017	2.41376	0.000821971	yes	OK
									PITPNM2	chr12	123467981	123595038	0.799564	2.94935	1.88311	0.000821971	yes	OK			SCAPER	chr15	76640444	77176217	2.59011	12.7085	2.29471	0.000821971	yes	OK			CDS1	chr4	85504056	85574439	1.18279	6.3012	2.41343	0.000821971	yes	OK
									SAPCD2	chr9	139956574	139965028	14.889	54.9121	1.88287	0.000821971	yes	OK			GAL	chr11	68451982	68465848	138.984	676.858	2.28394	0.000821971	yes	OK			SPINK2	chr4	57675881	57687893	4.78974	25.491	2.41197	0.000821971	yes	OK
									ITGB5	chr3	124480700	124606575	18.9956	69.7239	1.87599	0.000821971	yes	OK			UTF1	chr10	135042846	135045269	154.974	752.354	2.27939	0.000821971	yes	OK			AIM1	chr6	106959729	107018334	0.210037	1.1177	2.41181	0.000821971	yes	OK
									WDHD1	chr14	55405296	55516208	9.24528	33.8825	1.87375	0.000821971	yes	OK			SYT2	chr1	202559721	202679638	0.72266	3.50657	2.27867	0.000821971	yes	OK			SYT2	chr1	202559721	202679638	0.72266	3.83523	2.40792	0.000821971	yes	OK
									NNT	chr5	43579266	43706596	7.17541	26.2615	1.87182	0.000821971	yes	OK			PQLC3	chr2	11295531	11319076	9.10909	44.0402	2.27344	0.000821971	yes	OK			KLF5	chr13	73633141	73651676	1.63609	8.6232	2.39797	0.000821971	yes	OK
									RPL9	chr4	39455744	39460568	9.0553	32.8489	1.85901	0.000821971	yes	OK			VASH2	chr1	213123886	213189168	18.3482	88.653	2.27253	0.000821971	yes	OK			SLC25A16	chr10	70239480	70287284	4.62467	24.3336	2.39553	0.000821971	yes	OK
									ZNF296	chr19	45574757	45579688	14.3581	52.0841	1.85898	0.000821971	yes	OK			CDS1	chr4	85504056	85574439	1.18279	5.7014	2.26912	0.000821971	yes	OK			ANGPTL4	chr19	8429010	8439257	1.37786	7.21743	2.38906	0.000821971	yes	OK
									SLC6A3	chr5	1392904	1445543	0.873715	3.16893	1.85876	0.000821971	yes	OK			LRFN5	chr14	42056484	42373752	1.17067	5.63183	2.26627	0.000821971	yes	OK			RNASE1	chr14	21269514	21271036	5.61606	29.2992	2.38323	0.000821971	yes	OK
									TRNP1	chr1	27320181	27328027	4.99485	18.0758	1.85555	0.000821971	yes	OK			NMU	chr4	56422691	56502566	3.2372	15.5645	2.26544	0.000821971	yes	OK			FAM113B	chr12	47602202	47630446	1.30774	6.80802	2.38016	0.000821971	yes	OK
									TMEM38A	chr19	16771776	16800825	1.93623	6.9892	1.85188	0.000821971	yes	OK			RAB20	chr13	111175412	111214071	1.57957	7.55269	2.25746	0.000821971	yes	OK			EZR	chr6	159186772	159240456	74.9795	390.237	2.37978	0.000821971	yes	OK
									DNAJA4	chr15	78556486	78574669	1.01769	3.67041	1.85065	0.000821971	yes	OK			CEBPA	chr19	33790839	33793430	2.31535	11.0696	2.2573	0.000821971	yes	OK			MRS2	chr6	24403083	24427130	27.9804	145.328	2.37683	0.000821971	yes	OK
									IDH3A	chr15	78441718	78462961	8.68454	31.3093	1.85007	0.000821971	yes	OK			GCNT2	chr6	10521567	10630094	3.63548	17.2109	2.2431	0.000821971	yes	OK			PLXDC2	chr10	20105212	20570063	0.451538	2.33999	2.37358	0.000821971	yes	OK
									RAP1GAP2	chr17	2699731	2941035	1.66201	5.97838	1.84683	0.000821971	yes	OK			GCH1	chr14	55308723	55369542	2.12993	10.0815	2.24283	0.000821971	yes	OK			GAL	chr11	68451982	68465848	138.984	719.782	2.37264	0.000821971	yes	OK
									PKNOX1	chr21	44394485	44453688	1.63786	5.88392	1.84497	0.000821971	yes	OK			MRS2	chr6	24403083	24427130	27.9804	132.168	2.23989	0.000821971	yes	OK			ANKRD45	chr1	173577474	173653026	0.97679	5.05152	2.3706	0.000821971	yes	OK
									BCL3	chr19	45251977	45263301	6.37906	22.8477	1.84063	0.000821971	yes	OK			PCK2	chr14	24563482	24573432	22.6782	107.016	2.23846	0.000821971	yes	OK			PTPRU	chr1	29563027	29653325	11.2759	58.2849	2.36988	0.000821971	yes	OK
									WWTR1	chr3	149235021	149421060	1.25318	4.47253	1.83549	0.000821971	yes	OK			MLKL	chr16	74705752	74734789	0.850929	3.9908	2.22957	0.000821971	yes	OK			HIST3H2A	chr1	228645064	228645560	10.31	53.1413	2.36579	0.000821971	yes	OK
									AQP3	chr9	33441151	33447631	2.17027	7.68158	1.82352	0.000821971	yes	OK			PLAU	chr10	75669726	75682535	5.0508	23.5189	2.21924	0.000821971	yes	OK			CARD11	chr7	2932978	3083509	1.27066	6.54847	2.36558	0.000821971	yes	OK
									PCP4L1	chr1	161228516	161255240	1.55728	5.50734	1.82233	0.000821971	yes	OK			GAS7	chr17	9813925	10101868	0.304658	1.41261	2.2131	0.000821971	yes	OK			HRASLS5	chr11	63014620	63330855	3.01515	15.4787	2.35999	0.000821971	yes	OK
									FDXR	chr17	72858539	72869156	17.2019	60.8246	1.82209	0.000821971	yes	OK			CYP2S1	chr19	41699114	41713446	27.7893	128.299	2.20691	0.000821971	yes	OK			RASSF7	chr11	560970	564698	9.86121	50.5779	2.35867	0.000821971	yes	OK
									BEND4	chr4	42108243	42154895	0.783519	2.75736	1.81525	0.000821971	yes	OK			F11R	chr1	160948199	160991133	61.3199	282.948	2.20611	0.000821971	yes	OK			THBS1	chr15	39873279	39890032	0.787747	4.03263	2.35592	0.000821971	yes	OK
									LECT1	chr13	53277398	53314007	13.7571	48.3152	1.8123	0.000821971	yes	OK			SIGIRR	chr11	405711	417397	8.65066	39.4503	2.18915	0.000821971	yes	OK			BCL3	chr19	45251977	45263301	6.37906	32.4825	2.34824	0.000821971	yes	OK
									C6orf211	chr6	151773421	151791518	40.9168	143.43	1.80958	0.000821971	yes	OK			CHORDC1	chr11	89933496	89956532	3.76999	17.1762	2.18778	0.000821971	yes	OK			CD177	chr19	43857824	43868245	1.29019	6.5586	2.34581	0.000821971	yes	OK
									ZNF569	chr19	37901956	37958395	2.35473	8.24897	1.80865	0.000821971	yes	OK			CGN	chr1	151483861	151511170	7.30894	33.2079	2.18379	0.000821971	yes	OK			USP28	chr11	113668594	113746286	4.77135	24.2139	2.34337	0.000821971	yes	OK
									HUS1	chr7	48002740	48019222	12.4794	43.6895	1.80775	0.000821971	yes	OK			EFEMP1	chr2	56093096	56151298	1.8215	8.27545	2.18371	0.000821971	yes	OK			ITGB5	chr3	124480700	124606575	18.9956	96.0981	2.33884	0.000821971	yes	OK
									KRT18	chr12	53290968	53346695	144.303	505	1.80718	0.000821971	yes	OK			BCL3	chr19	45251977	45263301	6.37906	28.9538	2.18234	0.000821971	yes	OK			LRFN5	chr14	42056484	42373752	1.17067	5.91474	2.33698	0.000821971	yes	OK
									FAM102B	chr1	109102347	109182023	4.78577	16.6236	1.79641	0.000821971	yes	OK			ZNF114	chr19	48766403	48791286	1.96994	8.92949	2.18043	0.000821971	yes	OK			MT1A,MT1DP,MT1E,MT1F,MT1H,MT1JP,MT2A	chr16	56642468	56705048	34.0481	171.978	2.33658	0.000821971	yes	OK
									TAF13	chr1	109605050	109618685	3.25697	11.31	1.79599	0.000821971	yes	OK			KRT18	chr12	53290968	53346695	144.303	653.396	2.17886	0.000821971	yes	OK			PHLDA2	chr11	2949502	2957173	40.3392	203.247	2.33298	0.000821971	yes	OK
									TPD52	chr8	80947104	81083836	8.45602	29.2086	1.78835	0.000821971	yes	OK			SERPINE1	chr7	100770378	100782547	3.71686	16.7039	2.16803	0.000821971	yes	OK			HPSE	chr4	84213613	84256306	0.232674	1.17171	2.33223	0.000821971	yes	OK
									TERF1	chr8	73921045	73960097	3.52393	12.0686	1.776	0.000821971	yes	OK			FN1	chr2	216225178	216312544	6.97303	31.1752	2.16054	0.000821971	yes	OK			GCH1	chr14	55308723	55369542	2.12993	10.6945	2.32799	0.000821971	yes	OK
									LMCD1	chr3	8543510	8609845	1.91593	6.56127	1.77593	0.000821971	yes	OK			GADD45A	chr1	68150859	68154021	14.289	63.805	2.15877	0.000821971	yes	OK			TFIP11	chr22	26879849	26910551	23.2594	116.459	2.32394	0.000821971	yes	OK
									LPIN1	chr2	11886728	11967574	3.67172	12.5358	1.77153	0.000821971	yes	OK			LPIN1	chr2	11886728	11967574	3.67172	16.3659	2.15617	0.000821971	yes	OK			PIK3R5	chr17	8782144	8869029	0.979379	4.88579	2.31865	0.000821971	yes	OK
									PI4K2B	chr4	25235615	25280837	5.37647	18.3401	1.77027	0.000821971	yes	OK			IL34	chr16	70613797	70694639	4.07204	18.0807	2.15062	0.000821971	yes	OK			SERTAD1	chr19	40928406	40931932	9.67669	47.9891	2.31012	0.000821971	yes	OK
									ZNF253,ZNF486,ZNF90,ZNF93	chr19	19903230	20312307	11.8251	39.9265	1.75549	0.000821971	yes	OK			PIF1	chr15	65107828	65117838	11.2505	49.8942	2.14888	0.000821971	yes	OK			F11R	chr1	160948199	160991133	61.3199	302.719	2.30355	0.000821971	yes	OK
									XRCC6BP1	chr12	58335424	58351052	3.07508	10.3607	1.75243	0.000821971	yes	OK			MIR4469,RNF170	chr8	42704779	42751866	11.3904	50.4073	2.14582	0.000821971	yes	OK			CYP2S1	chr19	41699114	41713446	27.7893	136.181	2.29293	0.000821971	yes	OK
									CYP2S1	chr19	41699114	41713446	27.7893	93.2887	1.74717	0.000821971	yes	OK			ERVV-2	chr19	53547989	53554934	1.2062	5.30702	2.13744	0.000821971	yes	OK			PTCH2	chr1	45285515	45308616	0.439286	2.1522	2.29258	0.000821971	yes	OK
									HUNK	chr21	33245627	33376377	0.459896	1.54323	1.74658	0.000821971	yes	OK			FDXR	chr17	72858539	72869156	17.2019	75.2909	2.12991	0.000821971	yes	OK			LRFN5	chr14	42056484	42373752	1.44126	6.9887	2.27769	0.000821971	yes	OK
									REEP1	chr2	86441118	86565206	1.30641	4.37993	1.74531	0.000821971	yes	OK			CACNA2D3,ESRG	chr3	54156692	55108584	28.6968	124.926	2.12211	0.000821971	yes	OK			IFITM3	chr11	301041	320926	307	1487.21	2.2763	0.000821971	yes	OK
									PIF1	chr15	65107828	65117838	11.2505	37.6692	1.74339	0.000821971	yes	OK			PLEKHH3	chr17	40819931	40829048	8.68482	37.7016	2.11806	0.000821971	yes	OK			SPINK5	chr5	147443467	147610830	1.79242	8.66349	2.27304	0.000821971	yes	OK
									LAMC3	chr9	133884503	133968447	2.49989	8.34945	1.73982	0.000821971	yes	OK			GPNMB	chr7	23286315	23314731	0.5602	2.42505	2.114	0.000821971	yes	OK			EGLN3	chr14	34393420	34420284	1.67567	8.09603	2.27248	0.000821971	yes	OK
									CAPN1	chr11	64931619	64979541	31.5138	105.157	1.73848	0.000821971	yes	OK			CCRN4L	chr4	139936902	139968217	1.16797	5.05038	2.11239	0.000821971	yes	OK			UGP2	chr2	64068097	64246569	35.8462	172.829	2.26945	0.000821971	yes	OK
									KBTBD8	chr3	67048726	67061632	0.618554	2.04346	1.72404	0.000821971	yes	OK			PTPRU	chr1	29563027	29653325	11.2759	48.6081	2.10796	0.000821971	yes	OK			GAS7	chr17	9813925	10101868	0.304658	1.46848	2.26907	0.000821971	yes	OK
									EIF2C2	chr8	141541244	141645646	2.61803	8.6402	1.72258	0.000821971	yes	OK			FAM113B	chr12	47602202	47630446	1.30774	5.63391	2.10707	0.000821971	yes	OK			PCSK9	chr1	55505148	55530615	36.9522	177.375	2.26307	0.000821971	yes	OK
									AKAP12	chr6	151561133	151679694	11.4309	37.6885	1.72118	0.000821971	yes	OK			CCDC3	chr10	12938624	13043704	1.1254	4.84081	2.10482	0.000821971	yes	OK			DDT	chr22	24309025	24322019	82.7922	396.684	2.26043	0.000821971	yes	OK
									SLC25A19	chr17	73267379	73285530	10.4544	34.4371	1.71986	0.000821971	yes	OK			SMPDL3B	chr1	28261503	28285806	2.11135	9.07965	2.10447	0.000821971	yes	OK			TMEM51	chr1	15479027	15546976	2.89576	13.8724	2.26021	0.000821971	yes	OK
									MRPL18	chr6	160210940	160220036	68.2825	224.088	1.71448	0.000821971	yes	OK			LRFN5	chr14	42056484	42373752	1.44126	6.18792	2.10212	0.000821971	yes	OK			PLEKHH3	chr17	40819931	40829048	8.68482	41.5799	2.25932	0.000821971	yes	OK
									OAT	chr10	126070848	126107545	54.5001	178.415	1.7109	0.000821971	yes	OK			RET	chr10	43572516	43625797	1.09391	4.69136	2.10052	0.000821971	yes	OK			FDXR	chr17	72858539	72869156	17.2019	82.0349	2.25367	0.000821971	yes	OK
									ADAMTS4	chr1	161159478	161168845	1.55707	5.08943	1.70867	0.000821971	yes	OK			COL14A1	chr8	121137351	121384273	0.345644	1.47583	2.09417	0.000821971	yes	OK			PCDH9	chr13	66876965	67804468	0.605819	2.88671	2.25247	0.000821971	yes	OK
									TLE3	chr15	70325681	70390256	5.48466	17.9223	1.70828	0.000821971	yes	OK			RASSF7	chr11	560970	564698	9.86121	42.0422	2.092	0.000821971	yes	OK			TGFB1I1	chr16	31483475	31489281	1.78116	8.37542	2.23334	0.000821971	yes	OK
									ATAD3A,ATAD3B,ATAD3C	chr1	1385068	1470068	59.8279	195.394	1.7075	0.000821971	yes	OK			PLSCR1,PLSCR2	chr3	146151074	146262628	8.28463	35.2983	2.09109	0.000821971	yes	OK			C2CD4C	chr19	405442	409170	4.88591	22.9689	2.23298	0.000821971	yes	OK
									CHST2	chr3	142838617	142842856	11.472	37.4418	1.70654	0.000821971	yes	OK			SFN	chr1	27189583	27200868	18.8943	79.9706	2.08152	0.000821971	yes	OK			CAPG	chr2	85620717	85641197	24.3698	113.711	2.22221	0.000821971	yes	OK
									PFKP	chr10	3109711	3179129	37.2957	121.337	1.70194	0.000821971	yes	OK			SLC25A16	chr10	70239480	70287284	4.62467	19.4796	2.07454	0.000821971	yes	OK			ZNF850	chr19	37234289	37263716	0.866422	4.03927	2.22095	0.000821971	yes	OK
									PCSK9	chr1	55505148	55530615	36.9522	119.944	1.69863	0.000821971	yes	OK			KIAA1161	chr9	34366687	34376894	0.739874	3.10842	2.07083	0.000821971	yes	OK			WWTR1	chr3	149235021	149421060	1.25318	5.82684	2.21711	0.000821971	yes	OK
									DUSP5	chr10	112257624	112271302	2.22834	7.20069	1.69217	0.000821971	yes	OK			PIK3R5	chr17	8782144	8869029	0.979379	4.09928	2.06543	0.000821971	yes	OK			MLKL	chr16	74705752	74734789	0.850929	3.94602	2.21329	0.000821971	yes	OK
									FAM169A	chr5	74073251	74162615	1.26189	4.07731	1.69203	0.000821971	yes	OK			OSMR	chr5	38845959	38935743	0.291648	1.2189	2.06328	0.000821971	yes	OK			SUSD3	chr9	95820988	95847420	7.17462	33.2539	2.21255	0.000821971	yes	OK
									BUB1	chr2	111392922	111435684	23.9875	77.0139	1.68284	0.000821971	yes	OK			TNFSF9	chr19	6531009	6552633	29.3598	122.2	2.05733	0.000821971	yes	OK			RET	chr10	43572516	43625797	1.09391	5.03982	2.20388	0.000821971	yes	OK
									ITSN2	chr2	24425734	24583560	1.42432	4.56394	1.68	0.000821971	yes	OK			IBTK	chr6	82879840	82957530	2.25845	9.38499	2.05502	0.000821971	yes	OK			HERC5,HERC6	chr4	89299890	89427320	2.66851	12.2703	2.20106	0.000821971	yes	OK
									MORC4	chrX	106183875	106243474	1.43645	4.60196	1.67974	0.000821971	yes	OK			PLEKHF1	chr19	30156326	30166384	2.09328	8.69346	2.05416	0.000821971	yes	OK			HSPA2,PPP1R36	chr14	65007185	65056096	18.304	84.1227	2.20034	0.000821971	yes	OK
									CXCL12	chr10	44865604	44880545	1.37521	4.4056	1.67969	0.000821971	yes	OK			LYPD3	chr19	43964945	43969831	1.64006	6.80965	2.05383	0.000821971	yes	OK			SOCS3	chr17	76352858	76356158	3.8113	17.5158	2.2003	0.000821971	yes	OK
									PANK3	chr5	167973544	168006614	10.1614	32.3009	1.66847	0.000821971	yes	OK			FAM43A	chr3	194406621	194409766	1.08007	4.45508	2.04432	0.000821971	yes	OK			DUSP10	chr1	221874763	221915516	1.40241	6.43624	2.19831	0.000821971	yes	OK
									ECE2	chr3	183967444	184010819	12.2697	38.6243	1.65441	0.000821971	yes	OK			GALNT8	chr12	4829640	4913114	0.49168	2.02135	2.03953	0.000821971	yes	OK			LY6E	chr8	144099836	144112483	101.559	466.095	2.19831	0.000821971	yes	OK
									SLCO4C1	chr5	101569631	101632253	2.26143	7.11581	1.65379	0.000821971	yes	OK			NLRP2	chr19	55476651	55512601	60.0744	246.599	2.03734	0.000821971	yes	OK			S100A11	chr1	152004981	152009511	194.05	888.412	2.1948	0.000821971	yes	OK
									INA	chr10	105036919	105050108	9.00562	28.3312	1.65349	0.000821971	yes	OK			PTPRR	chr12	71031842	71314584	1.12404	4.61155	2.03656	0.000821971	yes	OK			BMP2	chr20	6748354	6760910	1.32077	6.04642	2.1947	0.000821971	yes	OK
									SLC1A3	chr5	36606456	36688436	2.22583	6.99435	1.65185	0.000821971	yes	OK			ATF3	chr1	212738675	212794169	3.78181	15.2672	2.01328	0.000821971	yes	OK			ELOVL3	chr10	103986142	103989344	1.10563	5.0542	2.19261	0.000821971	yes	OK
									ZBTB8B	chr1	32930657	32953459	0.488852	1.53306	1.64894	0.000821971	yes	OK			CHAC1	chr15	41245635	41248717	5.0737	20.442	2.01043	0.000821971	yes	OK			SLC6A6	chr3	14444014	14583588	9.90803	45.2826	2.19229	0.000821971	yes	OK
									RPL21	chr13	27825494	27830702	3.02966	9.48387	1.64632	0.000821971	yes	OK			DENND2C	chr1	115127195	115212732	0.377426	1.52052	2.0103	0.000821971	yes	OK			RHOF	chr12	122150657	122231870	7.66778	34.9585	2.18876	0.000821971	yes	OK
									TOMM7	chr7	22841951	22862511	154.114	481.089	1.6423	0.000821971	yes	OK			THBS1	chr15	39873279	39890032	0.787747	3.17236	2.00975	0.000821971	yes	OK			GADD45A	chr1	68150859	68154021	14.289	65.122	2.18824	0.000821971	yes	OK
									MAP7	chr6	136663418	136871957	0.692426	2.16111	1.64204	0.000821971	yes	OK			ADAMTSL4	chr1	150521897	150533497	1.92425	7.74414	2.00881	0.000821971	yes	OK			ACTG2	chr2	74120092	74146780	1.75416	7.97068	2.18392	0.000821971	yes	OK
									ATG3	chr3	112233474	112303253	40.9104	127.571	1.64076	0.000821971	yes	OK			MDM2	chr12	69201970	69244442	4.06546	16.3264	2.00571	0.000821971	yes	OK			MDM2	chr12	69201970	69244442	4.06546	18.451	2.18221	0.000821971	yes	OK
									OGDHL	chr10	50942684	50970425	4.50078	14.0272	1.63998	0.000821971	yes	OK			TUBB2B	chr6	3224494	3227968	40.721	163.458	2.00507	0.000821971	yes	OK			DENND2C	chr1	115127195	115212732	0.377426	1.71119	2.18074	0.000821971	yes	OK
									DCUN1D5	chr11	102921412	102962944	6.63969	20.611	1.63423	0.000821971	yes	OK			EGLN3	chr14	34393420	34420284	1.67567	6.68745	1.99672	0.000821971	yes	OK			ARRDC2	chr19	18111921	18124913	5.9332	26.7985	2.17527	0.000821971	yes	OK
									WARS	chr14	100800124	100842680	49.0001	151.682	1.6302	0.000821971	yes	OK			ULBP1,ULBP2	chr6	150263135	150294854	1.16011	4.62832	1.99622	0.000821971	yes	OK			PLAU	chr10	75669726	75682535	5.0508	22.7558	2.17165	0.000821971	yes	OK
									ACER2	chr9	19408908	19461777	1.43081	4.40941	1.62375	0.000821971	yes	OK			MRM1	chr17	34958019	34976114	3.57359	14.2313	1.99362	0.000821971	yes	OK			TRIM38	chr6	25963061	25985352	0.495298	2.2229	2.16607	0.000821971	yes	OK
									SPATA18	chr4	52917490	52963500	0.623764	1.91741	1.62009	0.000821971	yes	OK			TAF13	chr1	109605050	109618685	3.25697	12.9341	1.98958	0.000821971	yes	OK			MDGA2	chr14	47308723	48144157	1.70474	7.63925	2.16388	0.000821971	yes	OK
									MYO1E	chr15	59428167	59665082	8.86437	27.2382	1.61954	0.000821971	yes	OK			LOC100505761	chr10	104209423	104216054	3.36148	13.3282	1.98731	0.000821971	yes	OK			CRLF1	chr19	18704002	18717660	3.25882	14.5022	2.15385	0.000821971	yes	OK
									APOBEC3A,APOBEC3B,APOBEC3C,APOBEC3D,APOBEC3F,APOBEC3G	chr22	39353526	39483748	11.8918	36.5034	1.61807	0.000821971	yes	OK			HSPA4L	chr4	128703392	128755364	0.994052	3.91678	1.97828	0.000821971	yes	OK			PNP	chr14	20937537	20946165	19.7321	87.1259	2.14256	0.000821971	yes	OK
									AP1S3	chr2	224620046	224702319	0.810972	2.48832	1.61745	0.000821971	yes	OK			ZNF296	chr19	45574757	45579688	14.3581	56.4035	1.97392	0.000821971	yes	OK			IL34	chr16	70613797	70694639	4.07204	17.8966	2.13586	0.000821971	yes	OK
									ZNF274	chr19	58694395	58739077	5.00025	15.27	1.61063	0.000821971	yes	OK			DDT	chr22	24309025	24322019	82.7922	325.081	1.97323	0.000821971	yes	OK			TMEM92	chr17	48348766	48358846	0.853612	3.73465	2.12932	0.000821971	yes	OK
									SLC4A11	chr20	3207905	3221619	9.55001	29.1637	1.6106	0.000821971	yes	OK			TMEM38A	chr19	16771776	16800825	1.93623	7.57037	1.96712	0.000821971	yes	OK			CALHM2	chr10	105206425	105212162	1.59729	6.98591	2.12882	0.000821971	yes	OK
									WDSUB1	chr2	160092303	160143236	3.48934	10.6035	1.60352	0.000821971	yes	OK			CNTNAP2	chr7	145813452	148118090	2.31907	9.01218	1.95833	0.000821971	yes	OK			CHORDC1	chr11	89933496	89956532	3.76999	16.4123	2.12215	0.000821971	yes	OK
									LOC729020	chr10	105005643	105007773	0.820691	2.49292	1.60292	0.000821971	yes	OK			PYY	chr17	42030106	42081837	4.55463	17.6441	1.95378	0.000821971	yes	OK			TAF13	chr1	109605050	109618685	3.25697	14.1042	2.11452	0.000821971	yes	OK
									GRB14	chr2	165349197	165478360	1.53312	4.63699	1.59672	0.000821971	yes	OK			GAL3ST4	chr7	99756864	99766373	0.801719	3.10316	1.95257	0.000821971	yes	OK			EPB41L4B	chr9	111934253	112083021	1.0898	4.71219	2.11234	0.000821971	yes	OK
									ARHGEF16	chr1	3371119	3401693	13.5173	40.8432	1.59528	0.000821971	yes	OK			CD2AP	chr6	47444783	47594996	2.96868	11.4796	1.95118	0.000821971	yes	OK			PQLC3	chr2	11295531	11319076	9.10909	39.2637	2.10782	0.000821971	yes	OK
									CCND3	chr6	41902535	42016610	9.00383	27.1354	1.59157	0.000821971	yes	OK			FAM169A	chr5	74073251	74162615	1.26189	4.83328	1.93742	0.000821971	yes	OK			MYC	chr8	128748314	128753681	12.209	52.3689	2.10076	0.000821971	yes	OK
									LOC387647	chr10	29698500	29711372	1.30139	3.92019	1.59087	0.000821971	yes	OK			NQO2	chr6	3000066	3023018	29.7484	113.757	1.93507	0.000821971	yes	OK			CLDN6	chr16	3064712	3068188	143.154	613.796	2.10019	0.000821971	yes	OK
									PIM2	chrX	48769868	48776413	33.6736	101.362	1.58983	0.000821971	yes	OK			CXCL12	chr10	44865604	44880545	1.37521	5.24281	1.93069	0.000821971	yes	OK			SLC30A1	chr1	211744909	211753685	10.8279	46.3293	2.09717	0.000821971	yes	OK
									FKBP4	chr12	2904107	2914587	35.9136	107.837	1.58625	0.000821971	yes	OK			CABLES1	chr18	20714527	20840434	0.418216	1.59169	1.92824	0.000821971	yes	OK			MRM1	chr17	34958019	34976114	3.57359	15.2594	2.09425	0.000821971	yes	OK
									SLC6A6	chr3	14444014	14583588	9.90803	29.1631	1.55748	0.000821971	yes	OK			FOXO1	chr13	41129800	41240734	0.766327	2.9135	1.92672	0.000821971	yes	OK			F3	chr1	94994542	95007413	16.983	72.4042	2.09198	0.000821971	yes	OK
									RBM15	chr1	110881944	110890119	6.33472	18.6256	1.55594	0.000821971	yes	OK			SLC7A5	chr16	87848435	87903100	62.5329	237.183	1.92331	0.000821971	yes	OK			GCNT2	chr6	10521567	10630094	3.63548	15.3383	2.07692	0.000821971	yes	OK
									SURF6	chr9	136194072	136203142	24.0216	70.5742	1.55481	0.000821971	yes	OK			S100A11	chr1	152004981	152009511	194.05	732.541	1.91648	0.000821971	yes	OK			KIAA1161	chr9	34366687	34376894	0.739874	3.12107	2.07669	0.000821971	yes	OK
									TARS	chr5	33440862	33468927	51.4169	150.921	1.55348	0.000821971	yes	OK			CABYR	chr18	21718954	21741617	10.4715	39.4914	1.91507	0.000821971	yes	OK			ATF3	chr1	212738675	212794169	3.78181	15.7715	2.06017	0.000821971	yes	OK
									DANCR	chr4	53578620	53580305	71.2171	208.96	1.55293	0.000821971	yes	OK			TBC1D23	chr3	99979685	100044248	18.1182	68.0912	1.91003	0.000821971	yes	OK			CABYR	chr18	21718954	21741617	10.4715	43.6459	2.05938	0.000821971	yes	OK
									IGSF1	chrX	130407480	130423403	3.00457	8.78204	1.5474	0.000821971	yes	OK			MIR622	chr13	90883435	90883531	903.909	3372.1	1.8994	0.000821971	yes	OK			ZBTB42	chr14	105266932	105271048	0.654651	2.70018	2.04426	0.000821971	yes	OK
									ATP5G3	chr2	176040985	176046490	74.7807	218.563	1.54731	0.000821971	yes	OK			MAFB	chr20	39314516	39317876	1.96909	7.34036	1.89832	0.000821971	yes	OK			C9orf3	chr9	97488950	97849697	2.97956	12.2227	2.03639	0.000821971	yes	OK
									DMRTA1	chr9	22446839	22452472	1.27454	3.72222	1.54618	0.000821971	yes	OK			SPATA18	chr4	52917490	52963500	0.623764	2.32338	1.89715	0.000821971	yes	OK			TMEM38A	chr19	16771776	16800825	1.93623	7.91473	2.03129	0.000821971	yes	OK
									SMPDL3A	chr6	123109970	123130932	1.51254	4.39824	1.53995	0.000821971	yes	OK			C9orf91	chr9	117373705	117408703	0.720487	2.68021	1.8953	0.000821971	yes	OK			CILP2	chr19	19649073	19657470	6.03402	24.6628	2.03115	0.000821971	yes	OK
									CDC20	chr1	43824513	43833745	66.9547	194.245	1.53662	0.000821971	yes	OK			ZNF253,ZNF486,ZNF90,ZNF93	chr19	19903230	20312307	11.8251	43.5127	1.87958	0.000821971	yes	OK			EPHA4	chr2	222282746	222437010	0.856397	3.49956	2.03082	0.000821971	yes	OK
									DSG2	chr18	29078026	29136874	7.88052	22.8343	1.53484	0.000821971	yes	OK			TANC1	chr2	159825145	160089170	1.16195	4.26391	1.87563	0.000821971	yes	OK			SERINC5	chr5	79407049	79551898	5.66829	23.0279	2.0224	0.000821971	yes	OK
									SERINC5	chr5	79407049	79551898	5.66829	16.3739	1.53041	0.000821971	yes	OK			C9orf3	chr9	97488950	97849697	2.97956	10.9284	1.8749	0.000821971	yes	OK			COL1A1	chr17	48261456	48287426	7.65224	30.9638	2.01663	0.000821971	yes	OK
									GCSH	chr16	81115551	81129980	2.40634	6.93819	1.52772	0.000821971	yes	OK			SUCLA2	chr13	48480942	48589377	28.0976	102.849	1.87201	0.000821971	yes	OK			PLK2	chr5	57749809	57755966	5.99012	24.1934	2.01396	0.000821971	yes	OK
									ELL2	chr5	95220801	95297775	0.945666	2.72362	1.52612	0.000821971	yes	OK			SLCO4A1	chr20	61273792	61303647	9.20916	33.6296	1.86859	0.000821971	yes	OK			PIF1	chr15	65107828	65117838	11.2505	45.316	2.01003	0.000821971	yes	OK
									KITLG	chr12	88886565	88974250	0.690331	1.98263	1.52205	0.000821971	yes	OK			SOCS3	chr17	76352858	76356158	3.8113	13.9099	1.86776	0.000821971	yes	OK			NQO1	chr16	69740145	69760533	6.62304	26.6756	2.00995	0.000821971	yes	OK
									C9orf3	chr9	97488950	97849697	2.97956	8.54946	1.52073	0.000821971	yes	OK			SH2D3C	chr9	130500595	130541048	0.91595	3.33215	1.86311	0.000821971	yes	OK			ADORA2B	chr17	15848230	15879409	4.06877	16.3839	2.00962	0.000821971	yes	OK
									RHBDF2	chr17	74466918	74497509	6.19127	17.7598	1.52031	0.000821971	yes	OK			PPM1H	chr12	63037761	63328918	1.63311	5.91345	1.85637	0.000821971	yes	OK			TRNP1	chr1	27320181	27328027	4.99485	20.0945	2.00829	0.000821971	yes	OK
									ARRDC2	chr19	18111921	18124913	5.9332	17.0055	1.51912	0.000821971	yes	OK			CD109	chr6	74405507	74538041	1.68015	6.05302	1.84907	0.000821971	yes	OK			CDKN1A	chr6	36644236	36655500	22.8459	91.7548	2.00585	0.000821971	yes	OK
									IQGAP1	chr15	90931472	91045475	9.56313	27.3785	1.51749	0.000821971	yes	OK			HUNK	chr21	33245627	33376377	0.459896	1.65642	1.84869	0.000821971	yes	OK			CCDC3	chr10	12938624	13043704	1.1254	4.51208	2.00336	0.000821971	yes	OK
									AEN	chr15	89164526	89198879	41.3407	118.353	1.51747	0.000821971	yes	OK			C2CD4C	chr19	405442	409170	4.88591	17.517	1.84205	0.000821971	yes	OK			ADM	chr11	10326641	10328923	4.23593	16.9528	2.00077	0.000821971	yes	OK
									UQCRHL	chr1	16133656	16134194	77.7098	222.444	1.51728	0.000821971	yes	OK			PIM2	chrX	48769868	48776413	33.6736	119.819	1.83116	0.000821971	yes	OK			MAN1C1	chr1	25943244	26112410	3.7035	14.7761	1.99631	0.000821971	yes	OK
									PERP	chr6	138409641	138428660	9.95713	28.5021	1.51726	0.000821971	yes	OK			RBPMS2	chr15	65032094	65067770	23.2838	82.6348	1.82742	0.000821971	yes	OK			KRT18	chr12	53290968	53346695	144.303	574.197	1.99245	0.000821971	yes	OK
									DDT	chr22	24309025	24322019	82.7922	236.707	1.51553	0.000821971	yes	OK			FBN3	chr19	8130286	8212447	0.821326	2.90018	1.82012	0.000821971	yes	OK			OTUD1	chr10	23728197	23731310	2.87965	11.4082	1.9861	0.000821971	yes	OK
									AXIN2	chr17	63524681	63557740	2.6058	7.44989	1.51549	0.000821971	yes	OK			CRLF1	chr19	18704002	18717660	3.25882	11.4742	1.81597	0.000821971	yes	OK			CNTNAP2	chr7	145813452	148118090	2.31907	9.0718	1.96784	0.000821971	yes	OK
									MDM2	chr12	69201970	69244442	4.06546	11.6162	1.51464	0.000821971	yes	OK			PHKA1	chrX	71798663	71934203	4.18434	14.7146	1.81418	0.000821971	yes	OK			LPIN1	chr2	11886728	11967574	3.67172	14.3576	1.96729	0.000821971	yes	OK
									CAV2	chr7	116139654	116148595	0.737199	2.10172	1.51144	0.000821971	yes	OK			ZNF737	chr19	20720001	20748626	0.663506	2.33279	1.81387	0.000821971	yes	OK			PTPRR	chr12	71031842	71314584	1.12404	4.37879	1.96184	0.000821971	yes	OK
									EFEMP1	chr2	56093096	56151298	1.8215	5.19135	1.51098	0.000821971	yes	OK			WARS	chr14	100800124	100842680	49.0001	172.111	1.81248	0.000821971	yes	OK			SLC4A3	chr2	220492291	220506702	2.22011	8.64345	1.96098	0.000821971	yes	OK
									SLC7A5	chr16	87848435	87903100	62.5329	177.576	1.50575	0.000821971	yes	OK			KLF5	chr13	73633141	73651676	1.63609	5.73509	1.80957	0.000821971	yes	OK			NQO2	chr6	3000066	3023018	29.7484	115.255	1.95394	0.000821971	yes	OK
									TET1	chr10	70320071	70454298	11.4135	32.3841	1.50454	0.000821971	yes	OK			MAN1C1	chr1	25943244	26112410	3.7035	12.9555	1.80661	0.000821971	yes	OK			TLE3	chr15	70325681	70390256	5.48466	21.1943	1.9502	0.000821971	yes	OK
									FAM83G	chr17	18855477	18950336	3.62081	10.2648	1.50332	0.000821971	yes	OK			DSG2	chr18	29078026	29136874	7.88052	27.4138	1.79854	0.000821971	yes	OK			SIX2	chr2	45232323	45236542	1.99673	7.69508	1.9463	0.000821971	yes	OK
									ZNF347	chr19	53641871	53662322	0.626098	1.77241	1.50125	0.000821971	yes	OK			LY6E	chr8	144099836	144112483	101.559	352.855	1.79676	0.000821971	yes	OK			HUS1	chr7	48002740	48019222	12.4794	48.0291	1.94436	0.000821971	yes	OK
									GAN	chr16	81348570	81413803	1.36438	3.86049	1.50054	0.000821971	yes	OK			HUS1	chr7	48002740	48019222	12.4794	43.3411	1.79619	0.000821971	yes	OK			SPTLC2	chr14	77972339	78083110	4.65946	17.792	1.93299	0.000821971	yes	OK
									VWA1	chr1	1370902	1378262	20.1757	57.0771	1.50029	0.000821971	yes	OK			SERINC5	chr5	79407049	79551898	5.66829	19.6759	1.79544	0.000821971	yes	OK			HSPA4L	chr4	128703392	128755364	0.994052	3.79203	1.93158	0.000821971	yes	OK
									TUBB2B	chr6	3224494	3227968	40.721	115.031	1.49817	0.000821971	yes	OK			SESN1	chr6	109307639	109415708	9.96429	34.5694	1.79466	0.000821971	yes	OK			PLSCR1,PLSCR2	chr3	146151074	146262628	8.28463	31.5224	1.92787	0.000821971	yes	OK
									GADD45B	chr19	2476122	2478297	3.98056	11.2379	1.49733	0.000821971	yes	OK			RCAN3	chr1	24822822	24863868	2.94619	10.1964	1.79114	0.000821971	yes	OK			SMOX	chr20	4129449	4168395	20.3474	77.2422	1.92454	0.000821971	yes	OK
									RPS26	chr12	56435685	56438007	8.01004	22.6052	1.49677	0.000821971	yes	OK			TMEM51	chr1	15479027	15546976	2.89576	9.96298	1.78264	0.000821971	yes	OK			MAFB	chr20	39314516	39317876	1.96909	7.45815	1.92129	0.000821971	yes	OK
									NCOA7	chr6	126102107	126253176	0.545731	1.54007	1.49673	0.000821971	yes	OK			PERP	chr6	138409641	138428660	9.95713	34.2104	1.78063	0.000821971	yes	OK			TUBB2B	chr6	3224494	3227968	40.721	153.924	1.91837	0.000821971	yes	OK
									PFKFB2	chr1	207226619	207254397	2.96259	8.35347	1.49552	0.000821971	yes	OK			CAV2	chr7	116139654	116148595	0.737199	2.53072	1.77942	0.000821971	yes	OK			EDIL3	chr5	83236379	83680611	1.2107	4.56458	1.91464	0.000821971	yes	OK
									CAPN6	chrX	110488326	110513774	1.20151	3.38402	1.49389	0.000821971	yes	OK			SERTAD1	chr19	40928406	40931932	9.67669	33.0566	1.77235	0.000821971	yes	OK			ECE2	chr3	183967444	184010819	12.2697	45.8947	1.90323	0.000821971	yes	OK
									LY6E	chr8	144099836	144112483	101.559	285.846	1.49292	0.000821971	yes	OK			SPTLC2	chr14	77972339	78083110	4.65946	15.8791	1.76889	0.000821971	yes	OK			CERS4	chr19	8274216	8328267	11.8559	44.2258	1.89928	0.000821971	yes	OK
									HSPA2,PPP1R36	chr14	65007185	65056096	18.304	51.3306	1.48766	0.000821971	yes	OK			GRB14	chr2	165349197	165478360	1.53312	5.19616	1.76098	0.000821971	yes	OK			LOC100505761	chr10	104209423	104216054	3.36148	12.5311	1.89834	0.000821971	yes	OK
									NPM3	chr10	103541046	103543170	8.96987	25.1315	1.48634	0.000821971	yes	OK			TNRC18	chr7	5346422	5463177	0.548571	1.84984	1.75365	0.000821971	yes	OK			ERVV-2	chr19	53547989	53554934	1.2062	4.49048	1.89641	0.000821971	yes	OK
									DHX34	chr19	47852537	47886331	11.063	30.9259	1.48307	0.000821971	yes	OK			HSPA2,PPP1R36	chr14	65007185	65056096	18.304	61.6697	1.7524	0.000821971	yes	OK			SLC7A5	chr16	87848435	87903100	62.5329	231.033	1.88541	0.000821971	yes	OK
									OIP5-AS1	chr15	41576162	41624819	19.6446	54.8208	1.48059	0.000821971	yes	OK			PCDH9	chr13	66876965	67804468	0.605819	2.03266	1.74641	0.000821971	yes	OK			CD2AP	chr6	47444783	47594996	2.96868	10.8925	1.87544	0.000821971	yes	OK
									RAD51	chr15	40987326	41026883	19.3707	54.032	1.47994	0.000821971	yes	OK			ADAM8	chr10	135075919	135090407	1.51671	5.03424	1.73083	0.000821971	yes	OK			ALOX12	chr17	6888441	6915653	1.68599	6.18482	1.87514	0.000821971	yes	OK
									CLDN6	chr16	3064712	3068188	143.154	396.819	1.47091	0.000821971	yes	OK			ECE2	chr3	183967444	184010819	12.2697	40.6662	1.72873	0.000821971	yes	OK			KREMEN2	chr16	3014216	3018464	34.3556	125.999	1.87479	0.000821971	yes	OK
									CENPA	chr2	27008881	27031455	26.6635	73.8294	1.46933	0.000821971	yes	OK			ERBB3	chr12	56473808	56497291	4.4365	14.6952	1.72786	0.000821971	yes	OK			WDR47	chr1	109512778	109584850	4.98497	18.1161	1.86161	0.000821971	yes	OK
									MYBL2	chr20	42295708	42345122	109.139	301.104	1.4641	0.000821971	yes	OK			IGSF1	chrX	130407480	130423403	3.00457	9.94725	1.72714	0.000821971	yes	OK			RBM15	chr1	110881944	110890119	6.33472	22.981	1.85909	0.000821971	yes	OK
									C2orf27A	chr2	132396724	132524977	5.7833	15.9505	1.46364	0.000821971	yes	OK			JPH1	chr8	75146936	75233742	0.970769	3.21346	1.72693	0.000821971	yes	OK			ECM1	chr1	150480486	150486267	11.9213	43.1055	1.85433	0.000821971	yes	OK
									KDM4A	chr1	44115796	44173012	11.2017	30.7479	1.45677	0.000821971	yes	OK			TFIP11	chr22	26879849	26910551	23.2594	76.9167	1.72548	0.000821971	yes	OK			CLDN23	chr8	8559665	8561617	4.84714	17.5218	1.85395	0.000821971	yes	OK
									GAS2L1	chr22	29702996	29708777	10.4543	28.6575	1.45481	0.000821971	yes	OK			BUB1	chr2	111392922	111435684	23.9875	79.2478	1.72409	0.000821971	yes	OK			SLCO4A1	chr20	61273792	61303647	9.20916	33.2783	1.85344	0.000821971	yes	OK
									HIST1H1E	chr6	26156558	26157343	10.7896	29.4951	1.45083	0.000821971	yes	OK			PPP1R3B	chr8	8993763	9009152	2.16371	7.14689	1.72381	0.000821971	yes	OK			PHKA1	chrX	71798663	71934203	4.18434	15.0096	1.84282	0.000821971	yes	OK
									LIAS	chr4	39460664	39479273	4.51234	12.3346	1.45077	0.000821971	yes	OK			LMCD1	chr3	8543510	8609845	1.91593	6.27738	1.71212	0.000821971	yes	OK			VWA1	chr1	1370902	1378262	20.1757	72.0503	1.83638	0.000821971	yes	OK
									ATP5G1	chr17	46970090	46982518	176.926	483.394	1.45005	0.000821971	yes	OK			PSTPIP2	chr18	43563501	43652250	3.4104	11.1398	1.70771	0.000821971	yes	OK			SEMA6B	chr19	4542599	4581793	0.915693	3.26235	1.83297	0.000821971	yes	OK
									SH2D4A	chr8	19171080	19253799	1.01665	2.75518	1.43833	0.000821971	yes	OK			CERS4	chr19	8274216	8328267	11.8559	38.6853	1.70618	0.000821971	yes	OK			TNK2	chr3	195590232	195635880	0.987833	3.5122	1.83004	0.000821971	yes	OK
									BAK1	chr6	33540230	33548097	12.0275	32.5695	1.43718	0.000821971	yes	OK			SH2D4A	chr8	19171080	19253799	1.01665	3.31437	1.70491	0.000821971	yes	OK			EFEMP1	chr2	56093096	56151298	1.8215	6.45595	1.8255	0.000821971	yes	OK
									FGF2	chr4	123747862	123844159	2.61274	7.05116	1.4323	0.000821971	yes	OK			AFAP1L1	chr5	148651400	148721407	1.10425	3.59258	1.70196	0.000821971	yes	OK			NLRP2	chr19	55476651	55512601	60.0744	211.85	1.81822	0.000821971	yes	OK
									FAM195A	chr16	691822	698679	17.6795	47.5649	1.42782	0.000821971	yes	OK			SLC6A6	chr3	14444014	14583588	9.90803	32.2314	1.7018	0.000821971	yes	OK			ULBP1,ULBP2	chr6	150263135	150294854	1.16011	4.0608	1.8075	0.000821971	yes	OK
									CLPX	chr15	65442525	65477563	11.4655	30.7072	1.42127	0.000821971	yes	OK			FAM72A	chr1	206138910	206155074	0.730625	2.37671	1.70177	0.000821971	yes	OK			ABCD1	chrX	152990304	153010216	3.1924	11.1392	1.80293	0.000821971	yes	OK
									ARHGAP8,PRR5,PRR5-ARHGAP8	chr22	45064426	45258722	21.3925	57.1713	1.41819	0.000821971	yes	OK			ALOX12	chr17	6888441	6915653	1.68599	5.46763	1.69732	0.000821971	yes	OK			MAP7	chr6	136663418	136871957	0.692426	2.41499	1.80228	0.000821971	yes	OK
									LLGL2	chr17	73521782	73571290	17.6718	46.9892	1.41088	0.000821971	yes	OK			CCND3	chr6	41902535	42016610	9.00383	29.1133	1.69307	0.000821971	yes	OK			CASP8	chr2	202098165	202152434	4.17523	14.5385	1.79995	0.000821971	yes	OK
									CASP8	chr2	202098165	202152434	4.17523	11.0409	1.40293	0.000821971	yes	OK			TLE1	chr9	84198481	84304502	15.8355	51.1513	1.69161	0.000821971	yes	OK			TANC1	chr2	159825145	160089170	1.16195	4.03508	1.79606	0.000821971	yes	OK
									RANGAP1	chr22	41641518	41682216	31.5869	83.3414	1.39971	0.000821971	yes	OK			ADORA2B	chr17	15848230	15879409	4.06877	13.0799	1.68469	0.000821971	yes	OK			NTS	chr12	86268072	86276770	5.85196	20.3196	1.79588	0.000821971	yes	OK
									DAZAP1	chr19	1407544	1435686	17.6173	46.2232	1.39163	0.000821971	yes	OK			OGDHL	chr10	50942684	50970425	4.50078	14.383	1.67612	0.000821971	yes	OK			HUNK	chr21	33245627	33376377	0.459896	1.59471	1.79391	0.000821971	yes	OK
									TMPO	chr12	98906750	98981457	27.1379	71.0827	1.38919	0.000821971	yes	OK			MATN3	chr2	20191812	20212455	1.88125	6.00374	1.67417	0.000821971	yes	OK			TNFRSF12A	chr16	3070312	3072383	68.5195	237.547	1.79363	0.000821971	yes	OK
									DNAJB6	chr7	157129709	157210200	20.1626	52.5467	1.38192	0.000821971	yes	OK			FAM78B	chr1	166029401	166136119	3.25375	10.3725	1.6726	0.000821971	yes	OK			NMU	chr4	56422691	56502566	3.2372	11.2226	1.79359	0.000821971	yes	OK
									ZNF677	chr19	53738637	53758114	1.55267	4.02441	1.37403	0.000821971	yes	OK			NUDT15	chr13	48611702	48621282	38.54	122.773	1.67156	0.000821971	yes	OK			FAM169A	chr5	74073251	74162615	1.26189	4.37331	1.79314	0.000821971	yes	OK
									CBS	chr21	44470440	44496472	112.112	289.742	1.36982	0.000821971	yes	OK			MARC1,MARC2	chr1	220921584	220988245	16.3926	52.212	1.67133	0.000821971	yes	OK			IBTK	chr6	82879840	82957530	2.25845	7.81694	1.79127	0.000821971	yes	OK
									TMEM2	chr9	74298276	74383800	1.29004	3.33235	1.36913	0.000821971	yes	OK			CD44	chr11	35160416	35253972	1.25601	3.99615	1.66976	0.000821971	yes	OK			CCNE1	chr19	30302772	30315220	17.3188	59.6554	1.78432	0.000821971	yes	OK
									NLN	chr5	64920557	65125247	7.78061	20.0578	1.36621	0.000821971	yes	OK			CORO2A	chr9	100883251	100955431	4.00846	12.7475	1.6691	0.000821971	yes	OK			CFLAR	chr2	201980775	202037411	9.06405	31.18	1.78239	0.000821971	yes	OK
									AURKA	chr20	54944443	54967351	32.1066	82.4378	1.36044	0.000821971	yes	OK			RAP1GAP2	chr17	2699731	2941035	1.66201	5.2762	1.66657	0.000821971	yes	OK			YPEL2	chr17	57409052	57479095	0.967129	3.32327	1.78082	0.000821971	yes	OK
									RCHY1	chr4	76394292	76439640	12.5877	32.225	1.35617	0.000821971	yes	OK			ALOX5	chr10	45869623	45941569	4.92173	15.6201	1.66617	0.000821971	yes	OK			CACNA2D3,ESRG	chr3	54156692	55108584	28.6968	98.2984	1.77628	0.000821971	yes	OK
									DNAJC15	chr13	43597183	43684011	24.5619	62.8564	1.35564	0.000821971	yes	OK			CLDN6	chr16	3064712	3068188	143.154	454.252	1.66592	0.000821971	yes	OK			DHX34	chr19	47852537	47886331	11.063	37.7016	1.76888	0.000821971	yes	OK
									HSP90AA1	chr14	102547074	102690011	65.2619	166.977	1.35534	0.000821971	yes	OK			INA	chr10	105036919	105050108	9.00562	28.553	1.66475	0.000821971	yes	OK			SLC5A5	chr19	17982781	18006012	1.69161	5.75965	1.76759	0.000821971	yes	OK
									ARHGEF10	chr8	1772148	1906810	3.58983	9.14441	1.34898	0.000821971	yes	OK			DMRTA1	chr9	22446839	22452472	1.27454	4.03754	1.66349	0.000821971	yes	OK			SDF2L1	chr22	21996541	21998588	87.6063	297.105	1.76187	0.000821971	yes	OK
									PCYT2	chr17	79858836	79869340	16.7769	42.5005	1.341	0.000821971	yes	OK			XRCC6BP1	chr12	58335424	58351052	3.07508	9.71834	1.66009	0.000821971	yes	OK			SH3D21	chr1	36771993	36787171	1.91903	6.49714	1.75943	0.000821971	yes	OK
									CERS4	chr19	8274216	8328267	11.8559	29.9848	1.33863	0.000821971	yes	OK			PTRF	chr17	40554466	40575338	9.81005	30.9105	1.65576	0.000821971	yes	OK			FOXO1	chr13	41129800	41240734	0.766327	2.59176	1.7579	0.000821971	yes	OK
									TLE1	chr9	84198481	84304502	15.8355	40.0102	1.33721	0.000821971	yes	OK			CAPN1	chr11	64931619	64979541	31.5138	98.9997	1.65144	0.000821971	yes	OK			CCND3	chr6	41902535	42016610	9.00383	30.3112	1.75124	0.000821971	yes	OK
									OCLN	chr5	68788118	68853931	1.76373	4.45194	1.33581	0.000821971	yes	OK			HSPH1	chr13	31709187	31736323	16.4739	51.5562	1.64597	0.000821971	yes	OK			JPH1	chr8	75146936	75233742	0.970769	3.2669	1.75072	0.000821971	yes	OK
									PQLC3	chr2	11295531	11319076	9.10909	22.9378	1.33235	0.000821971	yes	OK			ARRDC2	chr19	18111921	18124913	5.9332	18.5357	1.64342	0.000821971	yes	OK			NPW	chr16	2069520	2070757	32.9021	110.603	1.74914	0.000821971	yes	OK
									F11R	chr1	160948199	160991133	61.3199	154.108	1.32951	0.000821971	yes	OK			TLE3	chr15	70325681	70390256	5.48466	17.0941	1.64003	0.000821971	yes	OK			PERP	chr6	138409641	138428660	9.95713	33.2271	1.73856	0.000821971	yes	OK
									SUCLA2	chr13	48480942	48589377	28.0976	70.5102	1.32739	0.000821971	yes	OK			C6orf211	chr6	151773421	151791518	40.9168	127.295	1.63741	0.000821971	yes	OK			EIF2C2	chr8	141541244	141645646	2.61803	8.70188	1.73284	0.000821971	yes	OK
									LDLRAP1	chr1	25870075	25916679	8.27287	20.6358	1.31869	0.000821971	yes	OK			PFKFB2	chr1	207226619	207254397	2.96259	9.15999	1.62849	0.000821971	yes	OK			SPATA18	chr4	52917490	52963500	0.623764	2.06782	1.72904	0.000821971	yes	OK
									SERBP1	chr1	67873371	67896416	21.3673	53.2941	1.31857	0.000821971	yes	OK			IDH3A	chr15	78441718	78462961	8.68454	26.8136	1.62645	0.000821971	yes	OK			CRELD2	chr22	50312282	50321190	47.5345	156.861	1.72244	0.000821971	yes	OK
									C6orf106	chr6	34555065	34664625	4.50105	11.1977	1.31486	0.000821971	yes	OK			MRPL18	chr6	160210940	160220036	68.2825	210.55	1.62458	0.000821971	yes	OK			ERRFI1	chr1	8071778	8086393	2.78198	9.16962	1.72075	0.000821971	yes	OK
									FADS3	chr11	61640994	61659112	38.227	95.0538	1.31415	0.000821971	yes	OK			SLC30A1	chr1	211744909	211753685	10.8279	33.3764	1.62408	0.000821971	yes	OK			RBPMS2	chr15	65032094	65067770	23.2838	76.5427	1.71694	0.000821971	yes	OK
									ARHGEF26	chr3	153742189	153975658	1.27048	3.14675	1.30849	0.000821971	yes	OK			MAP7	chr6	136663418	136871957	0.692426	2.13381	1.6237	0.000821971	yes	OK			ALOX5	chr10	45869623	45941569	4.92173	16.151	1.71439	0.000821971	yes	OK
									DCTN5	chr16	23614459	23685068	7.08	17.5083	1.30622	0.000821971	yes	OK			AP1S3	chr2	224620046	224702319	0.810972	2.49548	1.62159	0.000821971	yes	OK			LMCD1	chr3	8543510	8609845	1.91593	6.22092	1.69908	0.000821971	yes	OK
									BAMBI	chr10	28966423	28971868	6.31696	15.6145	1.30558	0.000821971	yes	OK			MYC	chr8	128748314	128753681	12.209	37.2062	1.6076	0.000821971	yes	OK			SNAI1	chr20	48599512	48605420	7.25903	23.5559	1.69824	0.000821971	yes	OK
									RCC1,SNHG3	chr1	28832454	28866038	46.7144	115.434	1.30513	0.000821971	yes	OK			SUSD3	chr9	95820988	95847420	7.17462	21.8361	1.60574	0.000821971	yes	OK			TBC1D23	chr3	99979685	100044248	18.1182	58.7765	1.6978	0.000821971	yes	OK
									DENR	chr12	123237307	123257737	41.3295	101.985	1.30311	0.000821971	yes	OK			CDC20	chr1	43824513	43833745	66.9547	203.028	1.60042	0.000821971	yes	OK			RAP1GAP2	chr17	2699731	2941035	1.66201	5.38725	1.69662	0.000821971	yes	OK
									HSPB1	chr7	75931871	75950360	51.6667	127.402	1.30208	0.000821971	yes	OK			OAT	chr10	126070848	126107545	54.5001	164.879	1.59708	0.000821971	yes	OK			SLC3A2	chr11	62623406	62656457	182.928	588.659	1.68616	0.000821971	yes	OK
									GPRC5B	chr16	19870292	19896151	25.3739	62.514	1.30083	0.000821971	yes	OK			EIF2C2	chr8	141541244	141645646	2.61803	7.90258	1.59384	0.000821971	yes	OK			MATN3	chr2	20191812	20212455	1.88125	6.02033	1.67815	0.000821971	yes	OK
									MIR3134,PTBP3	chr9	114758831	115112545	4.72915	11.6281	1.29796	0.000821971	yes	OK			CCNE1	chr19	30302772	30315220	17.3188	52.172	1.59094	0.000821971	yes	OK			PTRF	chr17	40554466	40575338	9.81005	31.3767	1.67736	0.000821971	yes	OK
									HSPA9	chr5	137889487	137911318	90.1029	221.383	1.2969	0.000821971	yes	OK			PLK2	chr5	57749809	57755966	5.99012	18.0175	1.58874	0.000821971	yes	OK			HSPH1	chr13	31709187	31736323	16.4739	52.5955	1.67476	0.000821971	yes	OK
									C6orf228	chr6	11094265	11138969	1.24342	3.04509	1.29217	0.000821971	yes	OK			SLC3A2	chr11	62623406	62656457	182.928	548.98	1.58548	0.000821971	yes	OK			CAV2	chr7	116139654	116148595	0.737199	2.34529	1.66964	0.000821971	yes	OK
									PDE4DIP	chr1	144851423	145076186	4.64694	11.3757	1.2916	0.000821971	yes	OK			PNP	chr14	20937537	20946165	19.7321	59.1268	1.58327	0.000821971	yes	OK			ATP8B2	chr1	154298008	154335872	13.2235	41.9468	1.66546	0.000821971	yes	OK
									PGM2	chr4	37828281	37864559	7.30911	17.8914	1.2915	0.000821971	yes	OK			ELL2	chr5	95220801	95297775	0.945666	2.8288	1.58079	0.000821971	yes	OK			CD70	chr19	6585081	6591232	43.9024	138.885	1.66152	0.000821971	yes	OK
									NSMAF	chr8	59495687	59572404	10.9764	26.8146	1.28861	0.000821971	yes	OK			ASNS	chr7	97481428	97501854	21.4111	64.0359	1.58052	0.000821971	yes	OK			KCNG1	chr20	49620149	49639703	12.0649	38.0847	1.6584	0.000821971	yes	OK
									OTUD6B	chr8	92082423	92099324	6.11417	14.8888	1.284	0.000821971	yes	OK			SAPCD2	chr9	139956574	139965028	14.889	44.525	1.58036	0.000821971	yes	OK			PFKP	chr10	3109711	3179129	37.2957	117.627	1.65714	0.000821971	yes	OK
									DSC2	chr18	28645752	28682401	3.77435	9.19014	1.28386	0.000821971	yes	OK			KDM6A	chrX	44732422	44971902	3.56868	10.6508	1.5775	0.000821971	yes	OK			FUT4	chr11	94277016	94283064	0.774659	2.43863	1.65443	0.000821971	yes	OK
									LINC00116	chr2	110969105	110980517	7.05763	17.1539	1.28128	0.000821971	yes	OK			RBM15	chr1	110881944	110890119	6.33472	18.8675	1.57455	0.000821971	yes	OK			SUCLA2	chr13	48480942	48589377	28.0976	88.211	1.65051	0.000821971	yes	OK
									PPARGC1B	chr5	149109814	149234585	4.86501	11.8206	1.28079	0.000821971	yes	OK			AURKA	chr20	54944443	54967351	32.1066	95.4221	1.57145	0.000821971	yes	OK			KIRREL2	chr19	36316273	36358048	2.72919	8.56743	1.65039	0.000821971	yes	OK
									PLEKHH3	chr17	40819931	40829048	8.68482	21.0888	1.27991	0.000821971	yes	OK			RNASE1	chr14	21269514	21271036	5.61606	16.6783	1.57034	0.000821971	yes	OK			HSPA8	chr11	122928127	122932901	166.275	521.758	1.6498	0.000821971	yes	OK
									SHCBP1	chr16	46614467	46655311	4.85498	11.7876	1.27974	0.000821971	yes	OK			RNF19B	chr1	33401952	33430528	6.9259	20.3321	1.55368	0.000821971	yes	OK			KITLG	chr12	88886565	88974250	0.690331	2.16252	1.64735	0.000821971	yes	OK
									ALDH3A2	chr17	19552063	19580908	14.5996	35.2938	1.27348	0.000821971	yes	OK			SLC45A3	chr1	205626980	205649630	1.21453	3.56473	1.5534	0.000821971	yes	OK			C6orf211	chr6	151773421	151791518	40.9168	128.105	1.64656	0.000821971	yes	OK
									JMJD6	chr17	74708913	74722881	11.5617	27.8471	1.26817	0.000821971	yes	OK			RASSF3	chr12	65004292	65091347	0.514312	1.50837	1.55227	0.000821971	yes	OK			CORO2A	chr9	100883251	100955431	4.00846	12.5218	1.64332	0.000821971	yes	OK
									MCM10	chr10	13203553	13255298	17.7427	42.6435	1.2651	0.000821971	yes	OK			CALHM2	chr10	105206425	105212162	1.59729	4.67037	1.54791	0.000821971	yes	OK			RPL23A,SNORD42A,SNORD4A	chr17	27046999	27053949	159.63	498.654	1.64331	0.000821971	yes	OK
									IQGAP2	chr5	75699049	76004045	5.18499	12.4582	1.26468	0.000821971	yes	OK			CDKN1A	chr6	36644236	36655500	22.8459	66.791	1.54772	0.000821971	yes	OK			DSG2	chr18	29078026	29136874	7.88052	24.5174	1.63744	0.000821971	yes	OK
									AHSA1	chr14	77924372	77935817	65.9129	158.125	1.26243	0.000821971	yes	OK			WDHD1	chr14	55405296	55516208	9.24528	27.0033	1.54635	0.000821971	yes	OK			CD44	chr11	35160416	35253972	1.25601	3.90207	1.63539	0.000821971	yes	OK
									SEPHS2	chr16	30454951	30457224	46.8084	112.054	1.25936	0.000821971	yes	OK			ACER2	chr9	19408908	19461777	1.43081	4.16573	1.54173	0.000821971	yes	OK			DNASE2	chr19	12986024	12992335	6.90067	21.422	1.63428	0.000821971	yes	OK
									EIF3K	chr19	39109721	39127595	137.145	328.245	1.25907	0.000821971	yes	OK			KITLG	chr12	88886565	88974250	0.690331	2.0092	1.54126	0.000821971	yes	OK			TOR3A	chr1	179051111	179065267	38.519	119.392	1.63206	0.000821971	yes	OK
									CCND1	chr11	69455872	69469334	28.2205	67.5097	1.25835	0.000821971	yes	OK			PTPN6	chr12	7055727	7070480	3.46184	10.0609	1.53916	0.000821971	yes	OK			CDC20	chr1	43824513	43833745	66.9547	207.421	1.6313	0.000821971	yes	OK
									DDX21	chr10	70715827	70745097	21.6915	51.8858	1.25821	0.000821971	yes	OK			CILP2	chr19	19649073	19657470	6.03402	17.5333	1.53891	0.000821971	yes	OK			TSPAN9	chr12	3186520	3395730	1.378	4.24703	1.62388	0.000821971	yes	OK
									TIMM21	chr18	71815745	71826204	28.3169	67.51	1.25344	0.000821971	yes	OK			HSPA8	chr11	122928127	122932901	166.275	480.443	1.53079	0.000821971	yes	OK			MYSM1	chr1	59120407	59165747	2.55808	7.88122	1.62336	0.000821971	yes	OK
									MTO1	chr6	74171453	74212239	6.39874	15.1808	1.24639	0.000821971	yes	OK			TOMM7	chr7	22841951	22862511	154.114	444.783	1.5291	0.000821971	yes	OK			ALPL	chr1	21835857	21904905	76.3348	235.137	1.62309	0.000821971	yes	OK
									PAK1IP1	chr6	10695116	10710424	30.7035	72.696	1.24347	0.000821971	yes	OK			TOR3A	chr1	179051111	179065267	38.519	111.143	1.52877	0.000821971	yes	OK			IDH3A	chr15	78441718	78462961	8.68454	26.7484	1.62293	0.000821971	yes	OK
									SHPK,TRPV1	chr17	3468685	3539616	22.7318	53.7416	1.24133	0.000821971	yes	OK			FAM83G	chr17	18855477	18950336	3.62081	10.4187	1.52479	0.000821971	yes	OK			PIM2	chrX	48769868	48776413	33.6736	103.606	1.62142	0.000821971	yes	OK
									DSEL	chr18	65173818	65566856	0.669951	1.58081	1.23853	0.000821971	yes	OK			MORC4	chrX	106183875	106243474	1.43645	4.12506	1.5219	0.000821971	yes	OK			TPST2	chr22	26917933	26986089	39.67	121.325	1.61276	0.000821971	yes	OK
									CCNB1	chr5	68462836	68474070	74.8732	176.585	1.23784	0.000821971	yes	OK			SLCO4C1	chr5	101569631	101632253	2.26143	6.45229	1.51257	0.000821971	yes	OK			PFKFB2	chr1	207226619	207254397	2.96259	9.04844	1.61081	0.000821971	yes	OK
									TAX1BP1	chr7	27778991	28280996	26.6176	62.5678	1.23304	0.000821971	yes	OK			SMPDL3A	chr6	123109970	123130932	1.51254	4.30054	1.50754	0.000821971	yes	OK			ZNF253,ZNF486,ZNF90,ZNF93	chr19	19903230	20312307	11.8251	36.0982	1.61007	0.000821971	yes	OK
									DLGAP5	chr14	55613161	55658396	29.4023	69.1124	1.23301	0.000821971	yes	OK			RND3	chr2	151324656	151344209	3.33922	9.44632	1.50024	0.000821971	yes	OK			OAT	chr10	126070848	126107545	54.5001	165.727	1.60448	0.000821971	yes	OK
									RRM2	chr2	10260692	10271614	30.4066	71.4339	1.23222	0.000821971	yes	OK			MYBL2	chr20	42295708	42345122	109.139	308.584	1.4995	0.000821971	yes	OK			WARS	chr14	100800124	100842680	49.0001	148.674	1.6013	0.000821971	yes	OK
									KIAA0922	chr4	154387497	154558237	4.95995	11.6498	1.2319	0.000821971	yes	OK			ALPL	chr1	21835857	21904905	76.3348	215.149	1.49493	0.000821971	yes	OK			SURF6	chr9	136194072	136203142	24.0216	72.5532	1.5947	0.000821971	yes	OK
									MYO5B	chr18	47349155	47721469	2.49997	5.84365	1.22496	0.000821971	yes	OK			C8orf42	chr8	356807	495781	7.36298	20.7278	1.49321	0.000821971	yes	OK			AEN	chr15	89164526	89198879	41.3407	124.757	1.59348	0.000821971	yes	OK
									NUDT15	chr13	48611702	48621282	38.54	90.0356	1.22414	0.000821971	yes	OK			TNS3	chr7	47314665	47621742	3.53358	9.93647	1.4916	0.000821971	yes	OK			RHBDF2	chr17	74466918	74497509	6.19127	18.6812	1.59328	0.000821971	yes	OK
									RPS15	chr19	1438314	1441934	226.46	528.101	1.22156	0.000821971	yes	OK			FUT4	chr11	94277016	94283064	0.774659	2.16931	1.4856	0.000821971	yes	OK			CORO1A,LOC606724	chr16	30194730	30200575	10.0735	30.3709	1.59213	0.000821971	yes	OK
									FBXO22	chr15	76196199	76227699	11.0512	25.752	1.22048	0.000821971	yes	OK			PI4K2B	chr4	25235615	25280837	5.37647	15.0492	1.48496	0.000821971	yes	OK			SAPCD2	chr9	139956574	139965028	14.889	44.8102	1.58957	0.000821971	yes	OK
									GAL	chr11	68451982	68465848	138.984	323.36	1.21823	0.000821971	yes	OK			IQGAP1	chr15	90931472	91045475	9.56313	26.7285	1.48282	0.000821971	yes	OK			EPS8L1	chr19	55587220	55599354	13.639	41.0098	1.58823	0.000821971	yes	OK
									SAP30L	chr5	153825514	153840613	2.13393	4.95654	1.21582	0.000821971	yes	OK			LAPTM4A	chr2	20232410	20251789	118.947	331.523	1.47879	0.000821971	yes	OK			CD55	chr1	207494816	207551052	28.0654	83.9146	1.58013	0.000821971	yes	OK
									NIPA2	chr15	23004520	23034427	28.6138	66.3114	1.21255	0.000821971	yes	OK			YARS	chr1	33207371	33324527	36.5333	101.689	1.47689	0.000821971	yes	OK			PPAP2C	chr19	281041	291435	15.317	45.7123	1.57745	0.000821971	yes	OK
									ZNF146	chr19	36672926	36729774	28.2862	65.4791	1.21094	0.000821971	yes	OK			HMMR	chr5	162887516	162918953	14.8282	41.2274	1.47526	0.000821971	yes	OK			TFB2M	chr1	246703841	246831884	28.8872	85.886	1.57199	0.000821971	yes	OK
									HSP90AB2P	chr4	13335036	13339925	3.28317	7.59259	1.2095	0.000821971	yes	OK			PFKP	chr10	3109711	3179129	37.2957	103.28	1.46949	0.000821971	yes	OK			ZNF274	chr19	58694395	58739077	5.00025	14.8498	1.57037	0.000821971	yes	OK
									TOP1MT	chr8	144391250	144417050	19.6164	44.8556	1.19323	0.000821971	yes	OK			NEFL	chr8	24803839	24814255	39.4826	109.323	1.4693	0.000821971	yes	OK			NUDT15	chr13	48611702	48621282	38.54	114.45	1.57029	0.000821971	yes	OK
									MRPL15	chr8	55047767	55079591	30.1171	68.733	1.19042	0.000821971	yes	OK			CORO1A,LOC606724	chr16	30194730	30200575	10.0735	27.7859	1.46379	0.000821971	yes	OK			ATL3	chr11	63391557	63439156	5.23725	15.474	1.56296	0.000821971	yes	OK
									ARF6	chr14	50359735	50363772	17.8877	40.8063	1.18982	0.000821971	yes	OK			NPM3	chr10	103541046	103543170	8.96987	24.7378	1.46356	0.000821971	yes	OK			LMNA	chr1	156052627	156109878	274.218	809.974	1.56255	0.000821971	yes	OK
									TRIP6	chr7	100464949	100471076	35.2914	80.4703	1.18914	0.000821971	yes	OK			POLR3G	chr5	89770592	89810375	8.79561	24.208	1.46063	0.000821971	yes	OK			ACER2	chr9	19408908	19461777	1.43081	4.18	1.54667	0.000821971	yes	OK
									SELT	chr3	150321052	150348403	12.2738	27.9476	1.18714	0.000821971	yes	OK			ARHGAP8,PRR5,PRR5-ARHGAP8	chr22	45064426	45258722	21.3925	58.7457	1.45738	0.000821971	yes	OK			AXIN2	chr17	63524681	63557740	2.6058	7.58847	1.54209	0.000821971	yes	OK
									MPV17L2	chr19	18303990	18314874	34.7901	79.1794	1.18645	0.000821971	yes	OK			FAM63B	chr15	59063278	59154101	3.4876	9.5726	1.45668	0.000821971	yes	OK			BMP7	chr20	55743808	55841719	2.75076	7.98057	1.53666	0.000821971	yes	OK
									TIMM44	chr19	7991602	8008708	30.6843	69.7272	1.18422	0.000821971	yes	OK			AEN	chr15	89164526	89198879	41.3407	113.372	1.45543	0.000821971	yes	OK			TLE1	chr9	84198481	84304502	15.8355	45.8238	1.53294	0.000821971	yes	OK
									TUBA1C	chr12	49658864	49667113	147.247	332.967	1.17714	0.000821971	yes	OK			CBR1	chr21	37441939	37498938	46.1199	125.716	1.4467	0.000821971	yes	OK			XRCC6BP1	chr12	58335424	58351052	3.07508	8.8896	1.5315	0.000821971	yes	OK
									MRPL4	chr19	10362639	10370737	78.0684	176.488	1.17676	0.000821971	yes	OK			ERRFI1	chr1	8071778	8086393	2.78198	7.56411	1.44306	0.000821971	yes	OK			RNF19B	chr1	33401952	33430528	6.9259	19.8809	1.52131	0.000821971	yes	OK
									FAM126B	chr2	201838440	201936392	1.00038	2.26025	1.17593	0.000821971	yes	OK			CASP8	chr2	202098165	202152434	4.17523	11.338	1.44124	0.000821971	yes	OK			PLK3	chr1	45265792	45272957	13.8046	39.6169	1.52097	0.000821971	yes	OK
									LARP1B	chr4	128982000	129132571	4.33752	9.78541	1.17376	0.000821971	yes	OK			KIAA0922	chr4	154387497	154558237	4.95995	13.4684	1.44118	0.000821971	yes	OK			ELL2	chr5	95220801	95297775	0.945666	2.7052	1.51633	0.000821971	yes	OK
									YARS	chr1	33207371	33324527	36.5333	82.3765	1.17302	0.000821971	yes	OK			DNASE2	chr19	12986024	12992335	6.90067	18.6677	1.43574	0.000821971	yes	OK			MRPL18	chr6	160210940	160220036	68.2825	194.861	1.51286	0.000821971	yes	OK
									C6orf192	chr6	133090506	133119760	7.36049	16.5726	1.17093	0.000821971	yes	OK			ITSN2	chr2	24425734	24583560	1.42432	3.84661	1.43331	0.000821971	yes	OK			ITSN2	chr2	24425734	24583560	1.42432	4.05721	1.51021	0.000821971	yes	OK
									NF2	chr22	29999544	30094589	12.9034	29.0183	1.16921	0.000821971	yes	OK			SLC25A19	chr17	73267379	73285530	10.4544	28.2329	1.43327	0.000821971	yes	OK			FAU	chr11	64888024	64902033	296.564	840.817	1.50345	0.000821971	yes	OK
									CCNE1	chr19	30302772	30315220	17.3188	38.9471	1.16918	0.000821971	yes	OK			C6orf192	chr6	133090506	133119760	7.36049	19.8095	1.42832	0.000821971	yes	OK			TFRC	chr3	195776087	195809032	13.9524	39.5466	1.50304	0.000821971	yes	OK
									TPST2	chr22	26917933	26986089	39.67	89.2077	1.16912	0.000821971	yes	OK			OTUD1	chr10	23728197	23731310	2.87965	7.734	1.42532	0.000821971	yes	OK			GAN	chr16	81348570	81413803	1.36438	3.85227	1.49747	0.000821971	yes	OK
									FBXO45	chr3	196295538	196315930	4.73747	10.6115	1.16344	0.000821971	yes	OK			FKBP4	chr12	2904107	2914587	35.9136	96.4371	1.42506	0.000821971	yes	OK			HSPB1	chr7	75931871	75950360	51.6667	145.438	1.49309	0.000821971	yes	OK
									LYSMD3	chr5	89811444	89825401	3.92102	8.77451	1.16209	0.000821971	yes	OK			MMP24	chr20	33814443	33865764	6.58371	17.6474	1.42248	0.000821971	yes	OK			RND3	chr2	151324656	151344209	3.33922	9.34836	1.4852	0.000821971	yes	OK
									RPE	chr2	210867351	211036051	9.6938	21.6467	1.15901	0.000821971	yes	OK			BMP7	chr20	55743808	55841719	2.75076	7.37143	1.42212	0.000821971	yes	OK			AURKA	chr20	54944443	54967351	32.1066	89.8731	1.48502	0.000821971	yes	OK
									CENPE	chr4	104026962	104119566	3.36255	7.50378	1.15806	0.000821971	yes	OK			KDM4A	chr1	44115796	44173012	11.2017	29.9548	1.41907	0.000821971	yes	OK			TOMM7	chr7	22841951	22862511	154.114	431.36	1.48489	0.000821971	yes	OK
									POLR2L	chr11	839720	842529	123.596	275.451	1.15616	0.000821971	yes	OK			PKNOX1	chr21	44394485	44453688	1.63786	4.37302	1.41682	0.000821971	yes	OK			FRAT2	chr10	99092136	99102961	91.8737	256.912	1.48355	0.000821971	yes	OK
									NDUFAF4	chr6	97337186	97345767	15.9567	35.5259	1.15471	0.000821971	yes	OK			BNIP3	chr10	133747957	133795488	18.5984	49.5394	1.4134	0.000821971	yes	OK			SH2D4A	chr8	19171080	19253799	1.01665	2.84006	1.4821	0.000821971	yes	OK
									NOL11	chr17	65713938	65740568	27.9645	61.9767	1.14813	0.000821971	yes	OK			REST	chr4	57773908	57802013	9.68049	25.7808	1.41315	0.000821971	yes	OK			DNAJB1	chr19	14625581	14629201	33.378	93.1534	1.48071	0.000821971	yes	OK
									SNAP23	chr15	42787503	42825419	24.6429	54.2827	1.13932	0.000821971	yes	OK			BBS9	chr7	33169151	33645680	5.75936	15.337	1.41304	0.000821971	yes	OK			KIAA0922	chr4	154387497	154558237	4.95995	13.8063	1.47693	0.000821971	yes	OK
									ACAA2	chr18	47308532	47340298	28.9328	63.6158	1.13668	0.000821971	yes	OK			TRMT61B	chr2	29033699	29093411	14.3293	37.9822	1.40635	0.000821971	yes	OK			FAM83D	chr20	37554954	37581703	38.934	107.865	1.47012	0.000821971	yes	OK
									BAG2	chr6	57037103	57050496	11.4935	25.2565	1.13583	0.000821971	yes	OK			AKAP12	chr6	151561133	151679694	11.4309	30.2875	1.40578	0.000821971	yes	OK			MYBL2	chr20	42295708	42345122	109.139	301.587	1.46641	0.000821971	yes	OK
									TACC3	chr4	1723216	1746905	44.1138	96.8962	1.13521	0.000821971	yes	OK			MYO1E	chr15	59428167	59665082	8.86437	23.477	1.40516	0.000821971	yes	OK			SLC35E4	chr22	31031792	31043862	5.28097	14.5841	1.46552	0.000821971	yes	OK
									GNPTAB	chr12	102139121	102224720	5.86257	12.8713	1.13456	0.000821971	yes	OK			S100A10	chr1	151955385	151966714	533.065	1406.93	1.40017	0.000821971	yes	OK			PCSK5	chr9	78505559	78977255	1.76401	4.8672	1.46423	0.000821971	yes	OK
									GTF2E2	chr8	30436030	30515738	19.6383	43.0429	1.1321	0.000821971	yes	OK			LIAS	chr4	39460664	39479273	4.51234	11.8935	1.39822	0.000821971	yes	OK			LAPTM4A	chr2	20232410	20251789	118.947	327.739	1.46223	0.000821971	yes	OK
									HMGB3	chrX	150143651	150162540	25.3892	55.6194	1.13138	0.000821971	yes	OK			ACSL1	chr4	185676748	185747215	4.44357	11.6588	1.39163	0.000821971	yes	OK			ATAD3A,ATAD3B,ATAD3C	chr1	1385068	1470068	59.8279	164.607	1.46013	0.000821971	yes	OK
									STXBP2	chr19	7701990	7712759	15.649	34.2619	1.13053	0.000821971	yes	OK			SURF6	chr9	136194072	136203142	24.0216	62.8995	1.38871	0.000821971	yes	OK			REST	chr4	57773908	57802013	9.68049	26.6259	1.45968	0.000821971	yes	OK
									SLC25A39	chr17	42396865	42402217	162.109	354.718	1.12971	0.000821971	yes	OK			LARP1B	chr4	128982000	129132571	4.33752	11.352	1.388	0.000821971	yes	OK			FAM195A	chr16	691822	698679	17.6795	48.6027	1.45896	0.000821971	yes	OK
									MRPL2	chr6	43021766	43027242	37.0054	80.9523	1.12934	0.000821971	yes	OK			CKS1B,MIR4258	chr1	154947069	154951725	44.6065	116.105	1.3801	0.000821971	yes	OK			PCMT1	chr6	150070830	150132606	92.8922	255.115	1.45752	0.000821971	yes	OK
									PHB	chr17	47481411	47492247	102.96	224.896	1.12717	0.000821971	yes	OK			TERF1	chr8	73921045	73960097	3.52393	9.08443	1.36621	0.000821971	yes	OK			UHMK1	chr1	162466963	162499463	3.51496	9.64995	1.45701	0.000821971	yes	OK
									HKR1	chr19	37743053	37855392	11.8154	25.7768	1.12541	0.000821971	yes	OK			CBS	chr21	44470440	44496472	112.112	288.352	1.36288	0.000821971	yes	OK			OGDHL	chr10	50942684	50970425	4.50078	12.3363	1.45467	0.000821971	yes	OK
									NARS	chr18	55258447	55289177	57.5051	124.911	1.11914	0.000821971	yes	OK			DHX34	chr19	47852537	47886331	11.063	28.3674	1.35849	0.000821971	yes	OK			SESN1	chr6	109307639	109415708	9.96429	27.1569	1.44648	0.000821971	yes	OK
									MAD2L2	chr1	11724149	11781140	109.038	236.748	1.11852	0.000821971	yes	OK			HSPB1	chr7	75931871	75950360	51.6667	132.427	1.35789	0.000821971	yes	OK			PPP1R3B	chr8	8993763	9009152	2.16371	5.87873	1.442	0.000821971	yes	OK
									CCNC	chr6	99968743	100016825	42.8974	93.1312	1.11838	0.000821971	yes	OK			CEBPB	chr20	48807119	48809227	20.3813	52.1423	1.35521	0.000821971	yes	OK			FADS3	chr11	61640994	61659112	38.227	103.804	1.4412	0.000821971	yes	OK
									CHCHD4	chr3	14153534	14166414	17.6912	38.3891	1.11766	0.000821971	yes	OK			FAM83D	chr20	37554954	37581703	38.934	99.2727	1.35037	0.000821971	yes	OK			TMEM52	chr1	1848942	1850740	16.5086	44.7233	1.43781	0.000821971	yes	OK
									MRPS11	chr15	89010650	89023364	21.9999	47.7376	1.11763	0.000821971	yes	OK			ATL3	chr11	63391557	63439156	5.23725	13.257	1.33987	0.000821971	yes	OK			PYGB	chr20	25228705	25371618	79.9427	216.179	1.43519	0.000821971	yes	OK
									RBP1	chr3	139236275	139258671	45.3856	98.4102	1.11657	0.000821971	yes	OK			LEMD3	chr12	65563350	65642158	5.00155	12.6573	1.33953	0.000821971	yes	OK			PKNOX1	chr21	44394485	44453688	1.63786	4.42306	1.43323	0.000821971	yes	OK
									AARS2	chr6	44266461	44281095	12.4588	26.9858	1.11503	0.000821971	yes	OK			TET1	chr10	70320071	70454298	11.4135	28.8794	1.33929	0.000821971	yes	OK			BUB1	chr2	111392922	111435684	23.9875	64.7626	1.43288	0.000821971	yes	OK
									ATP5D	chr19	1241748	1244824	205.267	444.28	1.11397	0.000821971	yes	OK			CLPX	chr15	65442525	65477563	11.4655	28.9931	1.3384	0.000821971	yes	OK			CLPX	chr15	65442525	65477563	11.4655	30.9147	1.43099	0.000821971	yes	OK
									MRPS30	chr5	44808932	44820986	30.7974	66.5652	1.11196	0.000821971	yes	OK			ITM2A	chrX	78615877	78623049	4.33526	10.8916	1.32903	0.000821971	yes	OK			TNS3	chr7	47314665	47621742	3.53358	9.52126	1.43002	0.000821971	yes	OK
									WDR43	chr2	29117500	29174475	12.3143	26.6136	1.11183	0.000821971	yes	OK			MTHFD2	chr2	74425666	74570534	32.3821	81.0748	1.32406	0.000821971	yes	OK			AMOTL2	chr3	134074189	134093696	8.49719	22.8838	1.42927	0.000821971	yes	OK
									GJA1	chr6	121756744	121770959	24.3377	52.5515	1.11054	0.000821971	yes	OK			AMOTL2	chr3	134074189	134093696	8.49719	21.2734	1.32399	0.000821971	yes	OK			AKAP12	chr6	151561133	151679694	11.4309	30.3267	1.40765	0.000821971	yes	OK
									FASTKD1	chr2	170385872	170430497	13.9449	30.1004	1.11005	0.000821971	yes	OK			TRIAP1	chr12	120881579	120884215	40.5368	101.46	1.32361	0.000821971	yes	OK			FAM63B	chr15	59063278	59154101	3.4876	9.23757	1.40528	0.000821971	yes	OK
									TMOD3	chr15	52121824	52208235	11.2609	24.2879	1.10892	0.000821971	yes	OK			KIAA1217,PRINS	chr10	23983674	24836776	6.42492	16.0593	1.32166	0.000821971	yes	OK			POP1	chr8	99129520	99172110	4.7326	12.5035	1.40163	0.000821971	yes	OK
									AMD1	chr6	111195923	111218369	37.7522	81.2026	1.10497	0.000821971	yes	OK			ATP8B2	chr1	154298008	154335872	13.2235	33.0101	1.31981	0.000821971	yes	OK			TRIP6	chr7	100464949	100471076	35.2914	92.7553	1.39411	0.000821971	yes	OK
									RBM19	chr12	114254542	114404176	9.28171	19.9642	1.10495	0.000821971	yes	OK			PIDD	chr11	799113	809503	14.375	35.7807	1.31562	0.000821971	yes	OK			KDM6A	chrX	44732422	44971902	3.56868	9.36927	1.39255	0.000821971	yes	OK
									ESCO1	chr18	19109058	19180786	5.67874	12.2092	1.10433	0.000821971	yes	OK			LPGAT1	chr1	211916798	212004114	1.95816	4.86403	1.31265	0.000821971	yes	OK			S100A10	chr1	151955385	151966714	533.065	1398.31	1.3913	0.000821971	yes	OK
									TOR3A	chr1	179051111	179065267	38.519	82.6411	1.10129	0.000821971	yes	OK			TMEM165	chr4	56262047	56296069	37.9706	94.2655	1.31185	0.000821971	yes	OK			ARHGAP8,PRR5,PRR5-ARHGAP8	chr22	45064426	45258722	21.3925	55.976	1.3877	0.000821971	yes	OK
									PLK1	chr16	23690122	23724821	74.5282	159.729	1.09977	0.000821971	yes	OK			TFRC	chr3	195776087	195809032	13.9524	34.5915	1.3099	0.000821971	yes	OK			MERTK	chr2	112656190	112787035	3.6033	9.41942	1.38632	0.000821971	yes	OK
									SIRT1	chr10	69644426	69678147	9.99347	21.4019	1.09868	0.000821971	yes	OK			DLGAP5	chr14	55613161	55658396	29.4023	72.8194	1.30839	0.000821971	yes	OK			PXN	chr12	120639093	120703608	25.4083	66.083	1.37898	0.000821971	yes	OK
									SDHB	chr1	17345224	17380665	70.1787	150.228	1.09805	0.000821971	yes	OK			XPO1	chr2	61705068	61765418	22.2763	54.9568	1.30279	0.000821971	yes	OK			FKBP4	chr12	2904107	2914587	35.9136	93.0377	1.37329	0.000821971	yes	OK
									TRIAP1	chr12	120881579	120884215	40.5368	86.7547	1.09771	0.000821971	yes	OK			GARS	chr7	30634180	30673648	56.6839	139.745	1.30179	0.000821971	yes	OK			MARC1,MARC2	chr1	220921584	220988245	16.3926	42.4301	1.37204	0.000821971	yes	OK
									TRAK2	chr2	202241929	202316319	3.21461	6.879	1.09756	0.000821971	yes	OK			KCNG1	chr20	49620149	49639703	12.0649	29.7061	1.29995	0.000821971	yes	OK			OLFML3	chr1	114522029	114524875	43.8639	113.421	1.37057	0.000821971	yes	OK
									HMMR	chr5	162887516	162918953	14.8282	31.5635	1.08991	0.000821971	yes	OK			UHMK1	chr1	162466963	162499463	3.51496	8.62733	1.29541	0.000821971	yes	OK			MYO1E	chr15	59428167	59665082	8.86437	22.8327	1.36501	0.000821971	yes	OK
									TXNRD1	chr12	104609558	104744167	37.4742	79.7144	1.08894	0.000821971	yes	OK			RBP1	chr3	139236275	139258671	45.3856	111.376	1.29513	0.000821971	yes	OK			OBFC2A	chr2	192542797	192553248	1.4311	3.68354	1.36397	0.000821971	yes	OK
									TK1	chr17	76170159	76183285	49.4817	105.224	1.08849	0.000821971	yes	OK			PXN	chr12	120639093	120703608	25.4083	62.2763	1.29338	0.000821971	yes	OK			TRIAP1	chr12	120881579	120884215	40.5368	103.847	1.35716	0.000821971	yes	OK
									TMEM165	chr4	56262047	56296069	37.9706	80.684	1.0874	0.000821971	yes	OK			DAZAP1	chr19	1407544	1435686	17.6173	43.1336	1.29182	0.000821971	yes	OK			BBS9	chr7	33169151	33645680	5.75936	14.7415	1.3559	0.000821971	yes	OK
									CYCS	chr7	25158269	25164980	19.9347	42.2268	1.08288	0.000821971	yes	OK			NARS	chr18	55258447	55289177	57.5051	140.724	1.2911	0.000821971	yes	OK			JMJD6	chr17	74708913	74722881	11.5617	29.5218	1.35243	0.000821971	yes	OK
									UTP20	chr12	101673875	101784537	3.90752	8.27682	1.08283	0.000821971	yes	OK			FADS3	chr11	61640994	61659112	38.227	93.2979	1.28725	0.000821971	yes	OK			LPAR2	chr19	19672515	19739441	19.2684	49.1941	1.35225	0.000821971	yes	OK
									XPO1	chr2	61705068	61765418	22.2763	47.1375	1.08137	0.000821971	yes	OK			NLN	chr5	64920557	65125247	7.78061	18.869	1.27807	0.000821971	yes	OK			KRR1	chr12	75874512	75905418	16.6972	42.6005	1.35126	0.000821971	yes	OK
									IMPA2	chr18	11981426	12030885	32.6823	69.1242	1.08068	0.000821971	yes	OK			PSAT1	chr9	80911977	80945009	69.063	167.473	1.27794	0.000821971	yes	OK			RGS2	chr1	192778168	192781407	36.752	93.5543	1.34798	0.000821971	yes	OK
									VASP	chr19	46010620	46030334	37.607	79.2779	1.07592	0.000821971	yes	OK			PHGDH	chr1	120254418	120286849	70.4622	170.758	1.27703	0.000821971	yes	OK			LLGL2	chr17	73521782	73571290	17.6718	44.9385	1.3465	0.000821971	yes	OK
									C9orf82	chr9	26840539	26892826	12.4667	26.2728	1.07549	0.000821971	yes	OK			PTPN14	chr1	214522038	214725109	2.06369	4.98728	1.27303	0.000821971	yes	OK			IQGAP1	chr15	90931472	91045475	9.56313	24.3146	1.34627	0.000821971	yes	OK
									DNAJB1	chr19	14625581	14629201	33.378	70.2961	1.07455	0.000821971	yes	OK			ANXA4	chr2	69968916	70053596	4.68245	11.292	1.26996	0.000821971	yes	OK			PRPF3	chr1	150293926	150335107	22.0657	56.033	1.34447	0.000821971	yes	OK
									SHMT1	chr17	18218593	18266862	20.5907	43.3283	1.07332	0.000821971	yes	OK			RPS27L	chr15	63445538	63449741	66.685	160.734	1.26924	0.000821971	yes	OK			ATP5G1	chr17	46970090	46982518	176.926	447.252	1.33794	0.000821971	yes	OK
									TWF2	chr3	52262625	52273183	27.7554	58.3378	1.07166	0.000821971	yes	OK			TARS	chr5	33440862	33468927	51.4169	123.795	1.26764	0.000821971	yes	OK			EPHB4	chr7	100399379	100425207	37.1352	93.7234	1.33562	0.000821971	yes	OK
									CDC6	chr17	38444133	38460852	18.2808	38.4144	1.07132	0.000821971	yes	OK			VWA1	chr1	1370902	1378262	20.1757	48.5746	1.26758	0.000821971	yes	OK			DSC2	chr18	28645752	28682401	3.77435	9.49653	1.33117	0.000821971	yes	OK
									PLS3	chrX	114795176	114885179	33.3056	69.9063	1.06966	0.000821971	yes	OK			DDX21	chr10	70715827	70745097	21.6915	52.1913	1.26668	0.000821971	yes	OK			MPV17L2	chr19	18303990	18314874	34.7901	87.5088	1.33075	0.000821971	yes	OK
									ZIK1	chr19	58095051	58105259	6.59533	13.7899	1.06409	0.000821971	yes	OK			TRIP6	chr7	100464949	100471076	35.2914	84.5472	1.26044	0.000821971	yes	OK			DANCR	chr4	53578620	53580305	71.2171	178.532	1.32589	0.000821971	yes	OK
									LARS2	chr3	45430074	45590328	13.8958	28.8579	1.05432	0.000821971	yes	OK			TPD52	chr8	80947104	81083836	8.45602	20.2521	1.26002	0.000821971	yes	OK			MRPL32	chr7	42971938	42977462	49.3979	123.371	1.32048	0.000821971	yes	OK
									NME1,NME1-NME2,NME2	chr17	49230863	49337745	583.368	1209.27	1.05165	0.000821971	yes	OK			ZNF677	chr19	53738637	53758114	1.55267	3.71483	1.25855	0.000821971	yes	OK			DDX21	chr10	70715827	70745097	21.6915	54.168	1.32031	0.000821971	yes	OK
									RIF1	chr2	152266396	152333924	9.79531	20.2761	1.04962	0.000821971	yes	OK			DSC2	chr18	28645752	28682401	3.77435	9.00617	1.25469	0.000821971	yes	OK			METTL13	chr1	171750760	171781111	32.8697	81.9443	1.31788	0.000821971	yes	OK
									PSMD12	chr17	65325927	65362721	32.2567	66.522	1.04423	0.000821971	yes	OK			PPP2R5A	chr1	212458714	212535276	7.69448	18.2863	1.24886	0.000821971	yes	OK			UTP20	chr12	101673875	101784537	3.90752	9.72739	1.3158	0.000821971	yes	OK
									CLINT1	chr5	157212750	157286183	21.3623	44.0428	1.04384	0.000821971	yes	OK			CCNB1	chr5	68462836	68474070	74.8732	177.725	1.24713	0.000821971	yes	OK			ZNF677	chr19	53738637	53758114	1.55267	3.85827	1.3132	0.000821971	yes	OK
									TALDO1	chr11	747431	765024	162.933	335.607	1.0425	0.000821971	yes	OK			EPHB4	chr7	100399379	100425207	37.1352	88.145	1.24709	0.000821971	yes	OK			GJA1	chr6	121756744	121770959	24.3377	60.4398	1.31231	0.000821971	yes	OK
									PLEKHB2	chr2	131862419	131907496	33.1649	68.2758	1.04172	0.000821971	yes	OK			DNMT3B	chr20	31350188	31397610	155.92	369.699	1.24555	0.000821971	yes	OK			PPP1R15A	chr19	49375648	49379524	25.8897	64.1357	1.30875	0.000821971	yes	OK
									DPYSL3	chr5	146770367	146889619	17.9644	36.9471	1.04033	0.000821971	yes	OK			FRAT2	chr10	99092136	99102961	91.8737	217.803	1.2453	0.000821971	yes	OK			LARP1B	chr4	128982000	129132571	4.33752	10.7404	1.30811	0.000821971	yes	OK
									NDUFAB1	chr16	23592334	23607639	340.933	701.105	1.04014	0.000821971	yes	OK			PCMT1	chr6	150070830	150132606	92.8922	219.909	1.24328	0.000821971	yes	OK			LEMD3	chr12	65563350	65642158	5.00155	12.3591	1.30512	0.000821971	yes	OK
									YWHAH	chr22	32329506	32361456	112.579	231.455	1.03979	0.000821971	yes	OK			GJA1	chr6	121756744	121770959	24.3377	57.5479	1.24157	0.000821971	yes	OK			C12orf5	chr12	4430358	4469206	3.58264	8.84615	1.30403	0.000821971	yes	OK
									CCNF	chr16	2479394	2508859	23.3009	47.8742	1.03886	0.000821971	yes	OK			F3	chr1	94994542	95007413	16.983	40.0404	1.23736	0.000821971	yes	OK			RFK	chr9	79000432	79009444	8.67158	21.3911	1.30265	0.000821971	yes	OK
									LEMD3	chr12	65563350	65642158	5.00155	10.2728	1.03838	0.000821971	yes	OK			TPST2	chr22	26917933	26986089	39.67	93.0165	1.22944	0.000821971	yes	OK			NIPA2	chr15	23004520	23034427	28.6138	70.3844	1.29855	0.000821971	yes	OK
									FBXW2	chr9	123519253	123555740	2.86487	5.87911	1.03713	0.000821971	yes	OK			PCYT2	chr17	79858836	79869340	16.7769	39.2567	1.22646	0.000821971	yes	OK			PI4K2B	chr4	25235615	25280837	5.37647	13.2108	1.29699	0.000821971	yes	OK
									CCT4	chr2	62095261	62115806	110.414	226.355	1.03567	0.000821971	yes	OK			CRELD2	chr22	50312282	50321190	47.5345	110.88	1.22195	0.000821971	yes	OK			TMEM165	chr4	56262047	56296069	37.9706	93.2427	1.29611	0.000821971	yes	OK
									USP32	chr17	58254439	58469586	4.23728	8.62755	1.02581	0.000821971	yes	OK			LDLRAP1	chr1	25870075	25916679	8.27287	19.281	1.22072	0.000821971	yes	OK			PTPN14	chr1	214522038	214725109	2.06369	5.05442	1.29232	0.000821971	yes	OK
									RNF14	chr5	141346401	141369856	4.91986	10.0121	1.02505	0.000821971	yes	OK			TUBA1C	chr12	49658864	49667113	147.247	342.019	1.21584	0.000821971	yes	OK			TIMM44	chr19	7991602	8008708	30.6843	75.1166	1.29163	0.000821971	yes	OK
									ALPL	chr1	21835857	21904905	76.3348	155.326	1.02489	0.000821971	yes	OK			XBP1	chr22	29189642	29196608	65.9814	153.016	1.21355	0.000821971	yes	OK			RDH10	chr8	74206836	74237520	2.81014	6.8694	1.28954	0.000821971	yes	OK
									PA2G4P4	chr3	156465131	156534851	9.24489	18.7739	1.022	0.000821971	yes	OK			C1orf31	chr1	234492405	234519980	85.7915	198.82	1.21255	0.000821971	yes	OK			XBP1	chr22	29189642	29196608	65.9814	161.16	1.28836	0.000821971	yes	OK
									PIK3CB	chr3	138371539	138553725	3.16493	6.42322	1.02113	0.000821971	yes	OK			NIPA2	chr15	23004520	23034427	28.6138	66.2993	1.21228	0.000821971	yes	OK			LSR	chr19	35739558	35758867	113.293	276.055	1.2849	0.000821971	yes	OK
									SEPHS1	chr10	13359424	13390331	23.7878	48.2146	1.01925	0.000821971	yes	OK			LPAR2	chr19	19672515	19739441	19.2684	44.6351	1.21194	0.000821971	yes	OK			PIDD	chr11	799113	809503	14.375	35.0016	1.28386	0.000821971	yes	OK
									MAP2K3	chr17	21187967	21218623	20.9856	42.5087	1.01836	0.000821971	yes	OK			SEPHS1	chr10	13359424	13390331	23.7878	55.0652	1.21092	0.000821971	yes	OK			ZIK1	chr19	58095051	58105259	6.59533	15.8078	1.26112	0.000821971	yes	OK
									GRPEL2	chr5	148724976	148734147	8.3382	16.8819	1.01767	0.000821971	yes	OK			RANGAP1	chr22	41641518	41682216	31.5869	73.0951	1.21045	0.000821971	yes	OK			CAPN1	chr11	64931619	64979541	31.5138	75.2993	1.25665	0.000821971	yes	OK
									MIR4426,RPS27A	chr2	55399686	55463264	67.8614	137.333	1.01702	0.000821971	yes	OK			HSPA9	chr5	137889487	137911318	90.1029	208.457	1.2101	0.000821971	yes	OK			WDR44	chrX	117480035	117583968	4.31882	10.2905	1.2526	0.000821971	yes	OK
									KIAA0020	chr9	2804111	2844151	32.4738	65.7085	1.0168	0.000821971	yes	OK			WDR44	chrX	117480035	117583968	4.31882	9.97691	1.20796	0.000821971	yes	OK			VASP	chr19	46010620	46030334	37.607	89.4154	1.24952	0.000821971	yes	OK
									STIP1	chr11	63953538	63972061	110.896	223.064	1.00825	0.000821971	yes	OK			GSTO1	chr10	106013929	106027387	35.6282	82.2974	1.20783	0.000821971	yes	OK			NEFL	chr8	24803839	24814255	39.4826	93.7366	1.24739	0.000821971	yes	OK
									ANKRD28	chr3	15708740	15901481	5.76408	11.5414	1.00166	0.000821971	yes	OK			N4BP3	chr5	177540506	177554095	6.61675	15.2747	1.20695	0.000821971	yes	OK			NOTCH1	chr9	139388892	139440462	7.81256	18.5181	1.24507	0.000821971	yes	OK
									UBE2G1	chr17	4172428	4269969	24.3638	48.6171	0.996721	0.000821971	yes	OK			ZIK1	chr19	58095051	58105259	6.59533	15.2253	1.20695	0.000821971	yes	OK			DNAJC15	chr13	43597183	43684011	24.5619	58.1185	1.24257	0.000821971	yes	OK
									KLF6	chr10	3818187	3827473	6.39722	12.6582	0.984561	0.000821971	yes	OK			RRM2B	chr8	103216728	103251346	8.81578	20.3026	1.2035	0.000821971	yes	OK			RRP9	chr3	51967445	51975922	49.3894	116.422	1.23709	0.000821971	yes	OK
									NDUFA4	chr7	10971578	10979953	63.6629	125.716	0.981637	0.000821971	yes	OK			RNPEP	chr1	201951765	201975275	41.3621	95.2049	1.20273	0.000821971	yes	OK			DHX37	chr12	125431369	125473667	10.3146	24.1669	1.22835	0.000821971	yes	OK
									UTP6	chr17	30187922	30228759	29.8341	58.9043	0.981411	0.000821971	yes	OK			HKR1	chr19	37743053	37855392	11.8154	27.122	1.1988	0.000821971	yes	OK			SLCO4C1	chr5	101569631	101632253	2.26143	5.29672	1.22786	0.000821971	yes	OK
									NCAPD3	chr11	134021705	134094426	10.8368	21.3746	0.979952	0.000821971	yes	OK			TIMM21	chr18	71815745	71826204	28.3169	64.9987	1.19875	0.000821971	yes	OK			POLRMT	chr19	589892	633581	31.1699	72.9445	1.22664	0.000821971	yes	OK
									PGM2L1	chr11	74041354	74109502	3.60024	7.09555	0.97882	0.000821971	yes	OK			CD70	chr19	6585081	6591232	43.9024	100.675	1.19734	0.000821971	yes	OK			IRF7	chr11	612545	615999	14.433	33.7424	1.22519	0.000821971	yes	OK
									PWP1	chr12	108079518	108107238	43.7389	85.0907	0.960085	0.000821971	yes	OK			SMOX	chr20	4129449	4168395	20.3474	46.5681	1.19449	0.000821971	yes	OK			NIPA1	chr15	23043278	23086843	1.77197	4.14219	1.22504	0.000821971	yes	OK
									DNAJA3	chr16	4475805	4506775	38.8212	75.4113	0.957935	0.000821971	yes	OK			ATP5G1	chr17	46970090	46982518	176.926	404.894	1.1944	0.000821971	yes	OK			LPGAT1	chr1	211916798	212004114	1.95816	4.57055	1.22287	0.000821971	yes	OK
									ABT1	chr6	26597170	26601056	23.7756	46.1189	0.955879	0.000821971	yes	OK			KRR1	chr12	75874512	75905418	16.6972	38.2018	1.19403	0.000821971	yes	OK			ANXA4	chr2	69968916	70053596	4.68245	10.9116	1.22053	0.000821971	yes	OK
									MRPS23	chr17	55912141	55927461	43.9469	84.8217	0.94867	0.000821971	yes	OK			ACAA2	chr18	47308532	47340298	28.9328	65.9169	1.18794	0.000821971	yes	OK			EIF4A3	chr17	78108086	78120985	119.543	278.258	1.21889	0.000821971	yes	OK
									MRPL3	chr3	131179199	131221860	52.0087	99.4387	0.935055	0.000821971	yes	OK			NFXL1	chr4	47849186	47916633	5.84458	13.2727	1.18329	0.000821971	yes	OK			MYADM	chr19	54369610	54379799	58.4877	135.749	1.21473	0.000821971	yes	OK
									PSMA5	chr1	109941652	109969108	19.4678	36.7105	0.915107	0.000821971	yes	OK			TIMM44	chr19	7991602	8008708	30.6843	69.4007	1.17745	0.000821971	yes	OK			RELL1	chr4	37455551	37687999	5.7403	13.3214	1.21455	0.000821971	yes	OK
									AKAP1	chr17	55162552	55198710	28.0738	52.758	0.910165	0.000821971	yes	OK			FHL2	chr2	105977079	106055230	12.9484	29.2127	1.17382	0.000821971	yes	OK			LAMC1	chr1	182992426	183114837	73.8841	171.083	1.21136	0.000821971	yes	OK
									HELZ	chr17	65066553	65242042	2.26678	4.24065	0.903644	0.000821971	yes	OK			WDR47	chr1	109512778	109584850	4.98497	11.217	1.17003	0.000821971	yes	OK			TET1	chr10	70320071	70454298	11.4135	26.3571	1.20745	0.000821971	yes	OK
									ADI1	chr2	3501007	3523590	36.0519	66.9822	0.893703	0.000821971	yes	OK			ZNF426	chr19	9637536	9649326	5.08794	11.4441	1.16946	0.000821971	yes	OK			C1orf31	chr1	234492405	234519980	85.7915	197.85	1.2055	0.000821971	yes	OK
									COTL1	chr16	84599198	84651692	156.539	86.2617	-0.859726	0.000821971	yes	OK			IDH1	chr2	209100947	209119864	110.965	249.268	1.16759	0.000821971	yes	OK			MRPL2	chr6	43021766	43027242	37.0054	85.3235	1.20521	0.000821971	yes	OK
									GLG1	chr16	74481323	74641042	79.1569	42.4996	-0.897263	0.000821971	yes	OK			KREMEN2	chr16	3014216	3018464	34.3556	77.1728	1.16755	0.000821971	yes	OK			TUBA1C	chr12	49658864	49667113	147.247	339.171	1.20377	0.000821971	yes	OK
									DERA	chr12	16064185	16190315	48.9392	25.354	-0.948777	0.000821971	yes	OK			TXN	chr9	113006091	113019082	200.788	450.568	1.16607	0.000821971	yes	OK			MTMR11,SF3B4	chr1	149895124	149911728	96.2814	221.752	1.20362	0.000821971	yes	OK
									KIRREL	chr1	157963062	158070076	20.98	10.6795	-0.974175	0.000821971	yes	OK			DANCR	chr4	53578620	53580305	71.2171	159.43	1.16262	0.000821971	yes	OK			RRM2	chr2	10260692	10271614	30.4066	69.7667	1.19816	0.000821971	yes	OK
									CHMP7	chr8	23101149	23119518	27.9325	14.1583	-0.980294	0.000821971	yes	OK			VASP	chr19	46010620	46030334	37.607	84.185	1.16256	0.000821971	yes	OK			ZNF622	chr5	16451627	16465894	24.0379	55.0914	1.19652	0.000821971	yes	OK
									VPS39	chr15	42450898	42500502	19.3969	9.68476	-1.00204	0.000821971	yes	OK			C12orf5	chr12	4430358	4469206	3.58264	8.00639	1.16013	0.000821971	yes	OK			MEF2D	chr1	156433518	156470625	5.98096	13.6965	1.19536	0.000821971	yes	OK
									RGS12	chr4	3294802	3441640	11.5972	5.75172	-1.01171	0.000821971	yes	OK			METTL13	chr1	171750760	171781111	32.8697	73.4319	1.15965	0.000821971	yes	OK			PCYT2	chr17	79858836	79869340	16.7769	38.2503	1.18899	0.000821971	yes	OK
									KANK2	chr19	11274942	11308243	11.5719	5.70314	-1.0208	0.000821971	yes	OK			PGM1	chr1	64058946	64125916	20.8632	46.5714	1.15848	0.000821971	yes	OK			S100A16	chr1	153579359	153585514	45.814	104.43	1.18867	0.000821971	yes	OK
									TPP1	chr11	6633996	6640692	32.1779	15.7869	-1.02734	0.000821971	yes	OK			RAB11FIP1	chr8	37716464	37757015	3.01904	6.72306	1.15503	0.000821971	yes	OK			PCK2	chr14	24563482	24573432	22.6782	51.6365	1.18709	0.000821971	yes	OK
									ZER1	chr9	131486740	131534198	18.1897	8.89134	-1.03265	0.000821971	yes	OK			AARS2	chr6	44266461	44281095	12.4588	27.6177	1.14843	0.000821971	yes	OK			MRPS30	chr5	44808932	44820986	30.7974	70.0336	1.18524	0.000821971	yes	OK
									CCND2	chr12	4382901	4414522	53.496	26.0996	-1.0354	0.000821971	yes	OK			ATAD3A,ATAD3B,ATAD3C	chr1	1385068	1470068	59.8279	132.57	1.14786	0.000821971	yes	OK			KIAA0020	chr9	2804111	2844151	32.4738	73.7195	1.18277	0.000821971	yes	OK
									USP11	chrX	47092313	47107728	109.183	52.7091	-1.05063	0.000821971	yes	OK			MPV17L2	chr19	18303990	18314874	34.7901	77.0392	1.14692	0.000821971	yes	OK			XPO1	chr2	61705068	61765418	22.2763	50.515	1.1812	0.000821971	yes	OK
									EXT2	chr11	44117098	44268787	53.4073	25.7773	-1.05094	0.000821971	yes	OK			KIF23	chr15	69706593	69740814	19.6023	43.2573	1.14192	0.000821971	yes	OK			DOHH	chr19	3490818	3500938	38.0004	85.9668	1.17777	0.000821971	yes	OK
									H2AFY	chr5	134669726	134735577	133.831	64.3314	-1.05682	0.000821971	yes	OK			CHCHD4	chr3	14153534	14166414	17.6912	38.8319	1.13421	0.000821971	yes	OK			NFKBIA	chr14	35870715	35873960	26.9927	61.0334	1.17703	0.000821971	yes	OK
									LRRN1	chr3	3841090	3890383	107.308	51.43	-1.06108	0.000821971	yes	OK			TRIB3	chr20	361307	378205	13.5371	29.6773	1.13244	0.000821971	yes	OK			BAK1	chr6	33540230	33548097	12.0275	27.1544	1.17485	0.000821971	yes	OK
									TNIP1	chr5	150409501	150467221	18.2195	8.73215	-1.06108	0.000821971	yes	OK			RELL1	chr4	37455551	37687999	5.7403	12.5748	1.13134	0.000821971	yes	OK			PTP4A1	chr6	64260277	64306999	29.2976	66.0853	1.17355	0.000821971	yes	OK
									ULK3	chr15	75128389	75135581	41.56	19.9098	-1.06172	0.000821971	yes	OK			CARS	chr11	3022151	3078681	25.4892	55.8293	1.13114	0.000821971	yes	OK			RCC1,SNHG3	chr1	28832454	28866038	46.7144	105.356	1.17334	0.000821971	yes	OK
									PRNP	chr20	4666796	4682241	59.8281	28.5852	-1.06555	0.000821971	yes	OK			PRPF3	chr1	150293926	150335107	22.0657	48.3134	1.13062	0.000821971	yes	OK			CHCHD2	chr7	56168779	56174210	131.816	297.192	1.17287	0.000821971	yes	OK
									EIF2AK2	chr2	37331651	37384225	9.65666	4.60924	-1.067	0.000821971	yes	OK			PGM2	chr4	37828281	37864559	7.30911	15.9977	1.13009	0.000821971	yes	OK			AARS2	chr6	44266461	44281095	12.4588	28.0024	1.16839	0.000821971	yes	OK
									PIK3R3	chr1	46505811	46598708	19.3711	9.24381	-1.06735	0.000821971	yes	OK			KCNS3	chr2	18059944	18114225	4.22954	9.24929	1.12884	0.000821971	yes	OK			RPS27L	chr15	63445538	63449741	66.685	148.787	1.15782	0.000821971	yes	OK
									PIGT	chr20	44044706	44066799	95.217	45.337	-1.07053	0.000821971	yes	OK			RCHY1	chr4	76394292	76439640	12.5877	27.4883	1.12681	0.000821971	yes	OK			PSMC4	chr19	40477011	40488765	109.661	244.628	1.15754	0.000821971	yes	OK
									CASC4	chr15	44580908	44707960	20.8965	9.91999	-1.07485	0.000821971	yes	OK			CCNC	chr6	99968743	100016825	42.8974	93.5121	1.12426	0.000821971	yes	OK			SDC4	chr20	43953928	43977064	20.4034	45.4657	1.15597	0.000821971	yes	OK
									FBLN1	chr22	45898592	45997040	302.713	143.252	-1.07939	0.000821971	yes	OK			SDF2L1	chr22	21996541	21998588	87.6063	190.093	1.1176	0.000821971	yes	OK			PIK3CB	chr3	138371539	138553725	3.16493	7.0465	1.15474	0.000821971	yes	OK
									CCDC50	chr3	190984943	191116459	5.66947	2.68176	-1.08003	0.000821971	yes	OK			STXBP2	chr19	7701990	7712759	15.649	33.9025	1.11532	0.000821971	yes	OK			ITM2B	chr13	48807273	48836232	152.62	338.492	1.14917	0.000821971	yes	OK
									UCP2	chr11	73685715	73693889	167.21	78.952	-1.08261	0.000821971	yes	OK			ESCO1	chr18	19109058	19180786	5.67874	12.2888	1.1137	0.000821971	yes	OK			TIMM17A	chr1	201924618	201944911	63.9322	141.728	1.14851	0.000821971	yes	OK
									CDK5RAP3	chr17	46048413	46059260	60.8813	28.7421	-1.08283	0.000821971	yes	OK			UTP20	chr12	101673875	101784537	3.90752	8.43651	1.1104	0.000821971	yes	OK			HSPA9	chr5	137889487	137911318	90.1029	198.867	1.14216	0.000821971	yes	OK
									DEGS1	chr1	224370909	224392251	122.955	57.9845	-1.08439	0.000821971	yes	OK			CYCS	chr7	25158269	25164980	19.9347	42.9893	1.1087	0.000821971	yes	OK			AHCTF1	chr1	246998272	247095333	5.61167	12.3716	1.14053	0.000821971	yes	OK
									KLHL13	chrX	117031775	117251303	8.06314	3.79549	-1.08705	0.000821971	yes	OK			MRPL32	chr7	42971938	42977462	49.3979	106.299	1.1056	0.000821971	yes	OK			HMMR	chr5	162887516	162918953	14.8282	32.675	1.13984	0.000821971	yes	OK
									POMGNT1	chr1	46654351	46686928	44.3376	20.8275	-1.09004	0.000821971	yes	OK			UBE2C	chr20	44441139	44446962	356.226	764.729	1.10216	0.000821971	yes	OK			B3GNT2	chr2	62423261	62451866	14.3543	31.5668	1.13693	0.000821971	yes	OK
									CNOT2	chr12	70634007	70748836	43.4639	20.2769	-1.09998	0.000821971	yes	OK			PIK3CB	chr3	138371539	138553725	3.16493	6.78647	1.10049	0.000821971	yes	OK			TIMM21	chr18	71815745	71826204	28.3169	62.2017	1.13529	0.000821971	yes	OK
									PLCG1	chr20	39765351	39804421	47.0414	21.8954	-1.1033	0.000821971	yes	OK			TIMM17A	chr1	201924618	201944911	63.9322	137.032	1.0999	0.000821971	yes	OK			GARS	chr7	30634180	30673648	56.6839	124.372	1.13366	0.000821971	yes	OK
									GLUL	chr1	182350838	182361341	184.558	85.8096	-1.10487	0.000821971	yes	OK			PAK1IP1	chr6	10695116	10710424	30.7035	65.6465	1.09632	0.000821971	yes	OK			UBE2C	chr20	44441139	44446962	356.226	780.731	1.13203	0.000821971	yes	OK
									CCNI	chr4	77968249	77997471	131.861	61.235	-1.10659	0.000821971	yes	OK			GTF2E2	chr8	30436030	30515738	19.6383	41.7175	1.08698	0.000821971	yes	OK			LGALS1	chr22	38071612	38075809	181.713	397.793	1.13035	0.000821971	yes	OK
									TRIM71	chr3	32858124	32957887	115.18	53.33	-1.11088	0.000821971	yes	OK			BAX	chr19	49458067	49465115	107.272	227.85	1.08682	0.000821971	yes	OK			CBS	chr21	44470440	44496472	112.112	244.831	1.12684	0.000821971	yes	OK
									GRINA	chr8	145064225	145067593	51.2223	23.6836	-1.11289	0.000821971	yes	OK			ANKRD28	chr3	15708740	15901481	5.76408	12.1957	1.08121	0.000821971	yes	OK			PAK1IP1	chr6	10695116	10710424	30.7035	67.0116	1.12601	0.000821971	yes	OK
									EXOC4	chr7	132937822	133750513	22.0353	10.1768	-1.11453	0.000821971	yes	OK			ZNF398	chr7	148823507	148880118	6.87365	14.5248	1.07937	0.000821971	yes	OK			HEATR1	chr1	236681513	236767924	23.8779	52.1069	1.1258	0.000821971	yes	OK
									ARL6IP5	chr3	69134089	69171746	46.8576	21.626	-1.11552	0.000821971	yes	OK			DNAJB1	chr19	14625581	14629201	33.378	70.5056	1.07884	0.000821971	yes	OK			WDR43	chr2	29117500	29174475	12.3143	26.7615	1.11982	0.000821971	yes	OK
									PIK3AP1	chr10	98352556	98480279	33.8855	15.6337	-1.11601	0.000821971	yes	OK			DNAJB6	chr7	157129709	157210200	20.1626	42.5616	1.07787	0.000821971	yes	OK			CCNB1	chr5	68462836	68474070	74.8732	162.662	1.11935	0.000821971	yes	OK
									PTCH1	chr9	98205263	98279247	2.9338	1.35276	-1.11686	0.000821971	yes	OK			LARS2	chr3	45430074	45590328	13.8958	29.2847	1.0755	0.000821971	yes	OK			LOC147804,ZNF525,ZNF761,ZNF765,ZNF813,ZNF845	chr19	53837001	53998042	13.635	29.603	1.11843	0.000821971	yes	OK
									SMYD3	chr1	245912555	246670644	59.1988	27.2769	-1.11789	0.000821971	yes	OK			ZNF146	chr19	36672926	36729774	28.2862	59.4918	1.07259	0.000821971	yes	OK			MRPL4	chr19	10362639	10370737	78.0684	167.938	1.10512	0.000821971	yes	OK
									ZNF532	chr18	56530060	56653719	10.9712	5.05102	-1.11907	0.000821971	yes	OK			USP32	chr17	58254439	58469586	4.23728	8.90561	1.07157	0.000821971	yes	OK			PIK3R4	chr3	130397777	130465696	11.6672	25.0811	1.10415	0.000821971	yes	OK
									NIPSNAP1	chr22	29950797	29977326	163.541	75.2405	-1.12007	0.000821971	yes	OK			GOLGA4	chr3	37283147	37408370	6.84927	14.3829	1.07033	0.000821971	yes	OK			SELT	chr3	150321052	150348403	12.2738	26.2961	1.09927	0.000821971	yes	OK
									PLEKHO1	chr1	150121759	150132366	73.5785	33.8228	-1.12129	0.000821971	yes	OK			SDHB	chr1	17345224	17380665	70.1787	147.172	1.06839	0.000821971	yes	OK			RANGAP1	chr22	41641518	41682216	31.5869	67.1949	1.08902	0.000821971	yes	OK
									GPHN	chr14	66974124	67648525	11.3675	5.20121	-1.128	0.000821971	yes	OK			PTP4A1	chr6	64260277	64306999	29.2976	61.3231	1.06565	0.000821971	yes	OK			LSG1	chr3	194361516	194393206	14.5748	31.0007	1.08882	0.000821971	yes	OK
									ESD	chr13	47345390	47371367	116.186	53.058	-1.1308	0.000821971	yes	OK			KIAA0020	chr9	2804111	2844151	32.4738	67.9518	1.06524	0.000821971	yes	OK			KDM4A	chr1	44115796	44173012	11.2017	23.7471	1.08403	0.000821971	yes	OK
									FADS1	chr11	61567094	61584562	134.283	61.1583	-1.13466	0.000821971	yes	OK			MRPL2	chr6	43021766	43027242	37.0054	77.2923	1.06259	0.000821971	yes	OK			NARS	chr18	55258447	55289177	57.5051	121.65	1.08098	0.000821971	yes	OK
									C20orf3	chr20	24943558	24973425	235.775	107.314	-1.13557	0.000821971	yes	OK			HES6	chr2	239146811	239148761	120.771	252.114	1.06181	0.000821971	yes	OK			MRPS23	chr17	55912141	55927461	43.9469	92.9588	1.08083	0.000821971	yes	OK
									TMEM123	chr11	102188180	102323775	66.7265	30.371	-1.13557	0.000821971	yes	OK			TACC3	chr4	1723216	1746905	44.1138	91.7355	1.05625	0.000821971	yes	OK			ANKRD28	chr3	15708740	15901481	5.76408	12.1773	1.07903	0.000821971	yes	OK
									SMAD3	chr15	67358052	67487616	10.8719	4.9364	-1.13907	0.000821971	yes	OK			CD46,CR1,CR1L	chr1	207669472	207968905	39.572	82.1378	1.05357	0.000821971	yes	OK			TUBB4B	chr9	140135596	140143355	292.125	613.687	1.07092	0.000821971	yes	OK
									C10orf58	chr10	82167584	82193072	95.2122	43.06	-1.1448	0.000821971	yes	OK			NSMAF	chr8	59495687	59572404	10.9764	22.781	1.05342	0.000821971	yes	OK			ESCO1	chr18	19109058	19180786	5.67874	11.9294	1.07088	0.000821971	yes	OK
									PCDHGA1,PCDHGA10,PCDHGA11,PCDHGA12,PCDHGA2,PCDHGA3,PCDHGA4,PCDHGA5,PCDHGA6,PCDHGA7,PCDHGA8,PCDHGA9,PCDHGB1,PCDHGB2,PCDHGB3,PCDHGB4,PCDHGB5,PCDHGB6,PCDHGB7,PCDHGC3,PCDHGC4,PCDHGC5	chr5	140710251	140892548	64.453	29.1319	-1.14565	0.000821971	yes	OK			PDHX	chr11	34903842	35017675	17.7987	36.9063	1.05209	0.000821971	yes	OK			CCDC51	chr3	48473574	48481529	29.2423	61.3004	1.06784	0.000821971	yes	OK
									GGH	chr8	63927638	63951610	97.9909	44.1676	-1.14966	0.000821971	yes	OK			UQCRHL	chr1	16133656	16134194	77.7098	160.21	1.0438	0.000821971	yes	OK			EIF3K	chr19	39109721	39127595	137.145	287.116	1.06593	0.000821971	yes	OK
									PON2	chr7	95031876	95064384	40.5833	18.2922	-1.14966	0.000821971	yes	OK			USP48	chr1	22004791	22109704	11.9456	24.6261	1.04371	0.000821971	yes	OK			CYCS	chr7	25158269	25164980	19.9347	41.4265	1.05527	0.000821971	yes	OK
									HP1BP3	chr1	21068881	21114033	57.4902	25.8923	-1.15079	0.000821971	yes	OK			PLK1	chr16	23690122	23724821	74.5282	153.621	1.04352	0.000821971	yes	OK			NOC2L	chr1	861120	895719	61.2877	127.315	1.05473	0.000821971	yes	OK
									SEMA6C	chr1	151104148	151119140	12.3396	5.54973	-1.1528	0.000821971	yes	OK			TSPAN13	chr7	16793350	16824428	16.2503	33.4833	1.04298	0.000821971	yes	OK			NDUFAB1	chr16	23592334	23607639	340.933	706.748	1.05171	0.000821971	yes	OK
									CREG1	chr1	167510250	167523056	40.7506	18.3074	-1.15439	0.000821971	yes	OK			HMGB3	chrX	150143651	150162540	25.3892	52.0984	1.03703	0.000821971	yes	OK			UQCRHL	chr1	16133656	16134194	77.7098	160.992	1.05082	0.000821971	yes	OK
									PKIA	chr8	79428335	79517502	8.40082	3.77031	-1.15585	0.000821971	yes	OK			RDH11	chr14	68143518	68162510	40.2806	82.5088	1.03446	0.000821971	yes	OK			CCNC	chr6	99968743	100016825	42.8974	86.8327	1.01735	0.000821971	yes	OK
									DNAJC1	chr10	22045476	22292650	12.1049	5.42937	-1.15673	0.000821971	yes	OK			MRPS23	chr17	55912141	55927461	43.9469	89.9503	1.03337	0.000821971	yes	OK			COX6A1	chr12	120875784	120878575	234.091	471.815	1.01115	0.000821971	yes	OK
									DNAJB9	chr7	108210188	108215294	11.3157	5.0734	-1.1573	0.000821971	yes	OK			RAD51	chr15	40987326	41026883	19.3707	39.5703	1.03054	0.000821971	yes	OK			SEC61G	chr7	54819923	54826939	272.506	544.767	0.999352	0.000821971	yes	OK
									FURIN	chr15	91411884	91426689	40.3107	18.0339	-1.16045	0.000821971	yes	OK			MAD2L2	chr1	11724149	11781140	109.038	222.591	1.02957	0.000821971	yes	OK			COMMD7	chr20	31289474	31331815	65.7918	33.9005	-0.956604	0.000821971	yes	OK
									KIAA0913	chr10	75545305	75561557	11.5911	5.18401	-1.16088	0.000821971	yes	OK			MIR4426,RPS27A	chr2	55399686	55463264	67.8614	138.101	1.02506	0.000821971	yes	OK			CDS2	chr20	5107406	5178533	17.4692	8.91968	-0.969752	0.000821971	yes	OK
									FJX1	chr11	35639734	35642545	66.5263	29.67	-1.16492	0.000821971	yes	OK			REXO2	chr11	114310107	114321000	35.9847	73.1616	1.0237	0.000821971	yes	OK			FBXL5	chr4	15606006	15657035	27.6605	13.9014	-0.992594	0.000821971	yes	OK
									DCHS1	chr11	6642474	6677074	11.2285	5.0067	-1.16523	0.000821971	yes	OK			MRPS30	chr5	44808932	44820986	30.7974	62.5616	1.02247	0.000821971	yes	OK			DTD1	chr20	18568555	18744644	120.619	60.4564	-0.996487	0.000821971	yes	OK
									ANXA5	chr4	122588189	122618284	440.242	196.207	-1.16592	0.000821971	yes	OK			ARFGEF2	chr20	47538267	47653232	5.28094	10.7057	1.01951	0.000821971	yes	OK			LIPA	chr10	90973156	91011660	40.8715	20.1063	-1.02345	0.000821971	yes	OK
									SUFU	chr10	104263718	104393214	11.2423	4.97607	-1.17586	0.000821971	yes	OK			EIF3K	chr19	39109721	39127595	137.145	277.684	1.01774	0.000821971	yes	OK			TRIM44	chr11	35684293	35832644	29.6632	14.5637	-1.02629	0.000821971	yes	OK
									QPRT,SPN	chr16	29674299	29710022	202.335	89.3462	-1.17927	0.000821971	yes	OK			HAX1	chr1	154244954	154248421	84.6681	170.673	1.01134	0.000821971	yes	OK			NOTCH3	chr19	15270355	15311849	57.3045	28.0902	-1.02858	0.000821971	yes	OK
									LEPRE1	chr1	43212005	43232755	119.37	52.5906	-1.18256	0.000821971	yes	OK			HJURP	chr2	234732187	234763212	21.9953	44.2873	1.0097	0.000821971	yes	OK			CDYL	chr6	4706392	4955784	24.7907	12.0836	-1.03675	0.000821971	yes	OK
									SLC39A6	chr18	33688428	33709357	38.4933	16.9528	-1.18309	0.000821971	yes	OK			DNAJC15	chr13	43597183	43684011	24.5619	49.4498	1.00954	0.000821971	yes	OK			2009-09-01	chr17	75277491	75496679	159.579	77.1144	-1.0492	0.000821971	yes	OK
									BTBD3	chr20	11871476	11907245	32.6174	14.3492	-1.18468	0.000821971	yes	OK			PGM2L1	chr11	74041354	74109502	3.60024	7.24213	1.00832	0.000821971	yes	OK			DLGAP4	chr20	34995443	35157041	78.6709	37.9783	-1.05066	0.000821971	yes	OK
									ATRN	chr20	3451664	3631770	13.423	5.89183	-1.18793	0.000821971	yes	OK			DPPA4	chr3	109044869	109056428	94.1287	188.464	1.00158	0.000821971	yes	OK			FZD7	chr2	202899309	202903160	72.1738	34.8114	-1.05191	0.000821971	yes	OK
									SEPN1	chr1	26126666	26144820	32.8572	14.3914	-1.191	0.000821971	yes	OK			MEF2D	chr1	156433518	156470625	5.98096	11.9524	0.998851	0.000821971	yes	OK			BTG1,LOC256021	chr12	92378751	92539673	15.001	7.22521	-1.05395	0.000821971	yes	OK
									C6orf72	chr6	149887357	149912967	24.1466	10.5408	-1.19584	0.000821971	yes	OK			DCUN1D5	chr11	102921412	102962944	6.63969	13.2677	0.998735	0.000821971	yes	OK			POMGNT1	chr1	46654351	46686928	44.3376	21.2795	-1.05907	0.000821971	yes	OK
									KCTD17	chr22	37447778	37459432	30.091	13.1314	-1.19631	0.000821971	yes	OK			PSMC4	chr19	40477011	40488765	109.661	218.901	0.997231	0.000821971	yes	OK			GPC3	chrX	132669748	133119840	26.7257	12.8047	-1.06155	0.000821971	yes	OK
									GLCCI1	chr7	8008373	8128709	5.88547	2.55716	-1.20262	0.000821971	yes	OK			UTP6	chr17	30187922	30228759	29.8341	59.0473	0.984909	0.000821971	yes	OK			HDGF	chr1	156711898	156722240	139.048	66.3279	-1.0679	0.000821971	yes	OK
									NADKD1	chr5	36192693	36242258	10.581	4.59654	-1.20286	0.000821971	yes	OK			TRIM28	chr19	59055835	59062082	218.964	432.921	0.98341	0.000821971	yes	OK			FKBP5,LOC285847	chr6	35541213	35704724	23.083	10.9401	-1.0772	0.000821971	yes	OK
									GAA	chr17	78075354	78093681	72.0793	31.2812	-1.20429	0.000821971	yes	OK			RGS2	chr1	192778168	192781407	36.752	72.6453	0.983044	0.000821971	yes	OK			CMPK1	chr1	47799468	47844511	27.2639	12.9077	-1.07876	0.000821971	yes	OK
									EFNA3	chr1	155051347	155060171	21.3291	9.25231	-1.20494	0.000821971	yes	OK			TARS2	chr1	150459909	150480173	38.8054	76.6254	0.981565	0.000821971	yes	OK			KIAA1430	chr4	186080791	186125292	14.166	6.70455	-1.07922	0.000821971	yes	OK
									KCTD7	chr7	66093867	66108216	4.35863	1.88834	-1.20676	0.000821971	yes	OK			WDR12	chr2	203741633	203776949	21.4602	42.3131	0.97944	0.000821971	yes	OK			CNOT2	chr12	70634007	70748836	43.4639	20.5465	-1.08093	0.000821971	yes	OK
									DDIT4	chr10	74033676	74037862	68.671	29.7243	-1.20806	0.000821971	yes	OK			PLS3	chrX	114795176	114885179	33.3056	65.6562	0.979164	0.000821971	yes	OK			SOX12	chr20	306198	310867	24.3388	11.5037	-1.08116	0.000821971	yes	OK
									DENND2A	chr7	140216387	140340571	19.306	8.34541	-1.20999	0.000821971	yes	OK			NUSAP1	chr15	41624891	41673324	47.828	94.1193	0.976635	0.000821971	yes	OK			DBNL	chr7	44084238	44101876	50.1717	23.7001	-1.08198	0.000821971	yes	OK
									HDAC6	chrX	48660247	48683387	45.796	19.7864	-1.21071	0.000821971	yes	OK			RCC1,SNHG3	chr1	28832454	28866038	46.7144	90.9291	0.960875	0.000821971	yes	OK			SREBF2	chr22	42228917	42303312	107.017	50.3883	-1.08668	0.000821971	yes	OK
									UBE2E3	chr2	181845111	181928352	49.8613	21.4933	-1.21404	0.000821971	yes	OK			UBE2G1	chr17	4172428	4269969	24.3638	47.3602	0.958932	0.000821971	yes	OK			COL6A2	chr21	47518032	47552763	112.261	52.6927	-1.09119	0.000821971	yes	OK
									KIF1A	chr2	241653180	241760776	10.8393	4.67049	-1.21462	0.000821971	yes	OK			NCAPD3	chr11	134021705	134094426	10.8368	20.923	0.949144	0.000821971	yes	OK			FBLN1	chr22	45898592	45997040	302.713	142.011	-1.09195	0.000821971	yes	OK
									C8orf83	chr8	93895730	93978372	5.04091	2.16823	-1.21717	0.000821971	yes	OK			CD164	chr6	109687716	109703762	26.1147	50.3597	0.947411	0.000821971	yes	OK			FAM213B	chr1	2517898	2564481	54.8673	25.703	-1.09401	0.000821971	yes	OK
									DNMBP	chr10	101635332	101769676	10.7794	4.6358	-1.21738	0.000821971	yes	OK			ACTN1	chr14	69340838	69446083	69.9072	133.942	0.938096	0.000821971	yes	OK			TBC1D20	chr20	416122	443187	18.2615	8.53936	-1.09661	0.000821971	yes	OK
									IDH2	chr15	90626301	90645747	110.987	47.6506	-1.21983	0.000821971	yes	OK			ADIPOR1	chr1	202909830	202927700	80.0249	151.789	0.923543	0.000821971	yes	OK			CAPN2	chr1	223889294	223963720	42.922	20.0387	-1.09893	0.000821971	yes	OK
									SLC16A9	chr10	61410486	61470035	16.6709	7.15358	-1.2206	0.000821971	yes	OK			NDUFAB1	chr16	23592334	23607639	340.933	644.868	0.919514	0.000821971	yes	OK			UCP2	chr11	73685715	73693889	167.21	78.0595	-1.09902	0.000821971	yes	OK
									ITM2C	chr2	231729620	231743969	325.364	139.534	-1.22144	0.000821971	yes	OK			ATP5G3	chr2	176040985	176046490	74.7807	141.19	0.916901	0.000821971	yes	OK			ESD	chr13	47345390	47371367	116.186	54.095	-1.10287	0.000821971	yes	OK
									IFT81	chr12	110562139	110656600	16.0544	6.87802	-1.22291	0.000821971	yes	OK			AFG3L2	chr18	12328884	12377331	39.6111	74.1484	0.904511	0.000821971	yes	OK			TPGS2	chr18	34366601	34805288	68.115	31.5585	-1.10995	0.000821971	yes	OK
									DOCK1	chr10	128589938	129250784	11.8228	5.04244	-1.22938	0.000821971	yes	OK			ATXN7L3B	chr12	74931550	74935232	29.3157	15.6864	-0.902162	0.000821971	yes	OK			SHKBP1	chr19	41082756	41097306	71.9311	33.2528	-1.11314	0.000821971	yes	OK
									CENPV	chr17	16243315	16256972	256.962	109.451	-1.23127	0.000821971	yes	OK			PREPL	chr2	44502596	44589001	10.1082	5.3353	-0.921881	0.000821971	yes	OK			C6orf89	chr6	36853639	36896741	10.945	5.05466	-1.11459	0.000821971	yes	OK
									MAP7D1	chr1	36621744	36646526	54.0708	23.0143	-1.23232	0.000821971	yes	OK			CCND2	chr12	4382901	4414522	53.496	27.7275	-0.948115	0.000821971	yes	OK			IP6K1	chr3	49761724	49823973	23.2664	10.6844	-1.12274	0.000821971	yes	OK
									GNAI2,GNAT1	chr3	50229042	50296836	358.348	152.457	-1.23296	0.000821971	yes	OK			USP47	chr11	11862969	11980872	11.4371	5.90262	-0.954299	0.000821971	yes	OK			ABHD10	chr3	111697827	111712217	35.5584	16.3129	-1.12418	0.000821971	yes	OK
									COMMD7	chr20	31289474	31331815	65.7918	27.9402	-1.23556	0.000821971	yes	OK			DAP	chr5	10679341	10761387	48.258	24.8417	-0.958004	0.000821971	yes	OK			GIT1	chr17	27900486	27916610	58.9372	27.0095	-1.12571	0.000821971	yes	OK
									BCL7C	chr16	30899115	30905399	70.2955	29.8332	-1.23651	0.000821971	yes	OK			FARP1	chr13	98795390	99102068	18.3171	9.40684	-0.961411	0.000821971	yes	OK			FNDC3A	chr13	49549179	49783916	10.9762	5.02419	-1.12742	0.000821971	yes	OK
									INPPL1	chr11	71935015	71955220	37.7463	15.9966	-1.23857	0.000821971	yes	OK			DCTD	chr4	183811183	183838630	55.8285	28.5511	-0.967454	0.000821971	yes	OK			PREPL	chr2	44502596	44589001	10.1082	4.6231	-1.12859	0.000821971	yes	OK
									TMEM98	chr17	31254927	31268847	75.3391	31.9182	-1.23902	0.000821971	yes	OK			HDGF	chr1	156711898	156722240	139.048	70.9993	-0.969711	0.000821971	yes	OK			DCTD	chr4	183811183	183838630	55.8285	25.5102	-1.12993	0.000821971	yes	OK
									YPEL5	chr2	30369749	30383486	20.9828	8.88792	-1.23929	0.000821971	yes	OK			WDR72	chr15	53805937	54051859	20.9388	10.6145	-0.980145	0.000821971	yes	OK			GNS	chr12	65107221	65153226	25.6162	11.693	-1.13142	0.000821971	yes	OK
									SLC39A13	chr11	47430045	47438107	44.5352	18.8449	-1.24077	0.000821971	yes	OK			TNNT1	chr19	55644086	55660606	147.395	74.6703	-0.98108	0.000821971	yes	OK			AUTS2	chr7	69063667	70258040	16.2972	7.43828	-1.13158	0.000821971	yes	OK
									LIPA	chr10	90973156	91011660	40.8715	17.2737	-1.24252	0.000821971	yes	OK			C6orf89	chr6	36853639	36896741	10.945	5.44364	-1.00763	0.000821971	yes	OK			WASF1	chr6	110420882	110501207	36.1151	16.452	-1.13434	0.000821971	yes	OK
									PTPRA,VPS16	chr20	2812169	3019591	129.797	54.8538	-1.24259	0.000821971	yes	OK			PTK7	chr6	43044028	43129457	83.3628	41.2295	-1.01573	0.000821971	yes	OK			ELMO2	chr20	44994657	45035271	37.2593	16.9544	-1.13594	0.000821971	yes	OK
									TTC8	chr14	89290977	89344335	11.4644	4.84476	-1.24266	0.000821971	yes	OK			ABL1	chr9	133589267	133763062	33.0656	16.3032	-1.02018	0.000821971	yes	OK			BBS4	chr15	72978519	73030880	17.902	8.14277	-1.13653	0.000821971	yes	OK
									BTBD2	chr19	1985392	2028818	61.8817	26.1151	-1.24463	0.000821971	yes	OK			GABARAP	chr17	7143625	7145753	342.324	168.006	-1.02685	0.000821971	yes	OK			ATXN7L3B	chr12	74931550	74935232	29.3157	13.331	-1.13689	0.000821971	yes	OK
									TCF7L2	chr10	114710008	114927439	21.5017	9.06672	-1.2458	0.000821971	yes	OK			CRYZL1	chr21	34961553	35014160	29.9597	14.6879	-1.0284	0.000821971	yes	OK			TP53INP1	chr8	95938199	95961615	9.27746	4.20688	-1.14098	0.000821971	yes	OK
									CDC42EP4	chr17	71279586	71308143	35.7448	15.0508	-1.24789	0.000821971	yes	OK			APBB1	chr11	6416352	6440644	56.2547	27.5737	-1.02868	0.000821971	yes	OK			APBB1	chr11	6416352	6440644	56.2547	25.4487	-1.14438	0.000821971	yes	OK
									FAM65A	chr16	67562716	67580691	9.89214	4.1627	-1.24876	0.000821971	yes	OK			IDH2	chr15	90626301	90645747	110.987	54.3049	-1.03124	0.000821971	yes	OK			ITGA5	chr12	54789043	54813061	23.0903	10.4391	-1.14529	0.000821971	yes	OK
									PARP4	chr13	24995067	25086948	12.6326	5.31562	-1.24884	0.000821971	yes	OK			TBC1D20	chr20	416122	443187	18.2615	8.8924	-1.03817	0.000821971	yes	OK			EXOC7	chr17	74075262	74099868	50.6651	22.8977	-1.14579	0.000821971	yes	OK
									WASF3	chr13	27131839	27263082	10.313	4.33728	-1.2496	0.000821971	yes	OK			PIP5K1C	chr19	3630178	3700477	24.2521	11.7665	-1.04342	0.000821971	yes	OK			ITGAV	chr2	187454789	187545628	6.3305	2.85398	-1.14934	0.000821971	yes	OK
									SH3BGRL3	chr1	26606212	26608091	265.944	111.633	-1.25237	0.000821971	yes	OK			JAG1	chr20	10618308	10654694	46.8436	22.7102	-1.04451	0.000821971	yes	OK			SOX2	chr3	181328150	181460279	126.371	56.8485	-1.15247	0.000821971	yes	OK
									ACTR1B	chr2	98272401	98280561	13.6332	5.71501	-1.2543	0.000821971	yes	OK			RBMXL2	chr11	7110164	7113520	29.1415	14.1112	-1.04623	0.000821971	yes	OK			DCAF12	chr9	34086380	34126771	20.0889	9.03604	-1.15264	0.000821971	yes	OK
									LRP1	chr12	57522281	57607175	5.59913	2.34445	-1.25595	0.000821971	yes	OK			AP1M1	chr19	16308664	16346186	79.4677	38.2414	-1.05523	0.000821971	yes	OK			EMP2	chr16	10622278	10674539	9.21922	4.14282	-1.15403	0.000821971	yes	OK
									TMEM108	chr3	132757170	133116661	8.49423	3.55492	-1.25666	0.000821971	yes	OK			TAF9B	chrX	77385244	77395179	16.3757	7.83406	-1.06372	0.000821971	yes	OK			CECR1	chr22	17648928	17690779	17.0342	7.65054	-1.1548	0.000821971	yes	OK
									ROR2	chr9	94484877	94712444	15.1265	6.32206	-1.25862	0.000821971	yes	OK			CHMP7	chr8	23101149	23119518	27.9325	13.3624	-1.06376	0.000821971	yes	OK			NISCH	chr3	52489523	52527091	50.7311	22.7771	-1.15529	0.000821971	yes	OK
									CROCC	chr1	17248444	17299474	14.0164	5.85606	-1.25911	0.000821971	yes	OK			ATP6V0E2	chr7	149564782	149577787	51.8929	24.7547	-1.06784	0.000821971	yes	OK			DAP	chr5	10679341	10761387	48.258	21.6218	-1.15828	0.000821971	yes	OK
									JAG1	chr20	10618308	10654694	46.8436	19.5305	-1.26212	0.000821971	yes	OK			CBX2	chr17	77751943	77762183	48.1082	22.877	-1.07239	0.000821971	yes	OK			RAB5B	chr12	56367696	56390467	23.223	10.376	-1.1623	0.000821971	yes	OK
									NENF	chr1	212606228	212619721	91.2786	37.9977	-1.26436	0.000821971	yes	OK			CD276	chr15	73976583	74006928	111.085	52.6755	-1.07646	0.000821971	yes	OK			PLEKHO1	chr1	150121759	150132366	73.5785	32.7591	-1.16739	0.000821971	yes	OK
									MAGEH1	chrX	55478537	55479999	29.8628	12.4111	-1.26672	0.000821971	yes	OK			MOAP1	chr14	93648540	93651249	22.222	10.5327	-1.07711	0.000821971	yes	OK			KIAA1324L	chr7	86506222	86689014	6.28833	2.79787	-1.16835	0.000821971	yes	OK
									DNAJB5	chr9	34989637	34998430	17.4326	7.24387	-1.26696	0.000821971	yes	OK			MAGED2,TRO	chrX	54834170	54957875	259.348	122.408	-1.0832	0.000821971	yes	OK			HERPUD2	chr7	35672269	35734772	16.5582	7.34723	-1.17227	0.000821971	yes	OK
									CPD	chr17	28705941	28796675	17.5955	7.31056	-1.26715	0.000821971	yes	OK			F2R	chr5	76011867	76031595	22.4332	10.581	-1.08416	0.000821971	yes	OK			HDHD2	chr18	44633666	44676871	23.7511	10.5356	-1.17272	0.000821971	yes	OK
									TSPAN14	chr10	82214037	82282393	29.5495	12.2322	-1.27245	0.000821971	yes	OK			PKN1	chr19	14544165	14582679	79.2908	37.338	-1.08651	0.000821971	yes	OK			IFT57	chr3	107879658	107941417	10.9575	4.8514	-1.17545	0.000821971	yes	OK
									CALB1	chr8	91070721	91108145	98.351	40.6146	-1.27594	0.000821971	yes	OK			FJX1	chr11	35639734	35642545	66.5263	31.3097	-1.08732	0.000821971	yes	OK			PLXNA3	chrX	153686622	153701985	6.84348	3.02739	-1.17665	0.000821971	yes	OK
									BTBD9	chr6	38136226	38607924	1.82671	0.754127	-1.27637	0.000821971	yes	OK			FZD6	chr8	104280948	104345096	13.9328	6.50569	-1.09871	0.000821971	yes	OK			PTMS	chr12	6875540	6880118	726.112	320.398	-1.18033	0.000821971	yes	OK
									WDR13	chrX	48455879	48463746	35.53	14.6579	-1.27736	0.000821971	yes	OK			AK1,ST6GALNAC6	chr9	130628758	130661871	26.9242	12.553	-1.10087	0.000821971	yes	OK			HIBADH	chr7	27565056	27702620	34.828	15.3474	-1.18225	0.000821971	yes	OK
									NRCAM	chr7	107788070	108096841	4.18828	1.72735	-1.2778	0.000821971	yes	OK			ODZ3	chr4	183060095	183727358	18.5531	8.6339	-1.10357	0.000821971	yes	OK			ARL2BP	chr16	57279008	57287563	35.3394	15.5376	-1.18552	0.000821971	yes	OK
									SLC2A1	chr1	43391045	43449029	202.129	83.0956	-1.28243	0.000821971	yes	OK			DEAF1	chr11	644125	704363	72.4472	33.6344	-1.10699	0.000821971	yes	OK			PTPRA,VPS16	chr20	2812169	3019591	129.797	56.9464	-1.18858	0.000821971	yes	OK
									AES	chr19	3052906	3062964	45.2907	18.6028	-1.28369	0.000821971	yes	OK			FUCA2	chr6	143815030	143833398	42.9571	19.9194	-1.10872	0.000821971	yes	OK			IFT52	chr20	42219578	42275878	60.9858	26.7301	-1.19001	0.000821971	yes	OK
									CACHD1	chr1	64936475	65158741	52.324	21.489	-1.28388	0.000821971	yes	OK			ULK3	chr15	75128389	75135581	41.56	19.2268	-1.11208	0.000821971	yes	OK			DOCK1	chr10	128589938	129250784	11.8228	5.18175	-1.19007	0.000821971	yes	OK
									EMP2	chr16	10622278	10674539	9.21922	3.78606	-1.28395	0.000821971	yes	OK			NAT14	chr19	55996556	55998937	56.306	26.0308	-1.11307	0.000821971	yes	OK			LEPREL2	chr12	6937571	6949047	43.9544	19.2498	-1.19116	0.000821971	yes	OK
									DCTD	chr4	183811183	183838630	55.8285	22.9016	-1.28555	0.000821971	yes	OK			PLP1	chrX	103004033	103047551	47.5546	21.9574	-1.11488	0.000821971	yes	OK			VIM	chr10	17270257	17279592	167.008	72.9218	-1.1955	0.000821971	yes	OK
									SGCE	chr7	94214506	94285521	36.4221	14.9301	-1.2866	0.000821971	yes	OK			FBXL14	chr12	1675158	1704001	20.4702	9.44879	-1.11533	0.000821971	yes	OK			USP47	chr11	11862969	11980872	11.4371	4.99325	-1.19568	0.000821971	yes	OK
									CTSH	chr15	79214064	79237420	41.7178	17.0972	-1.2869	0.000821971	yes	OK			CTNNBIP1	chr1	9908331	9970316	20.8224	9.59513	-1.11776	0.000821971	yes	OK			IRAK1	chrX	153275951	153285348	76.6093	33.3842	-1.19835	0.000821971	yes	OK
									CITED2	chr6	139693396	139695785	9.3789	3.842	-1.28756	0.000821971	yes	OK			ZFAND3	chr6	37787263	38122399	14.0145	6.43931	-1.12194	0.000821971	yes	OK			MFGE8	chr15	89420518	89456672	56.747	24.7229	-1.1987	0.000821971	yes	OK
									ALKBH2	chr12	109525991	109531473	55.895	22.8487	-1.2906	0.000821971	yes	OK			IGFBP4	chr17	38599675	38613982	73.8406	33.9114	-1.12264	0.000821971	yes	OK			EIF2AK2	chr2	37331651	37384225	9.65666	4.20531	-1.19931	0.000821971	yes	OK
									MEX3B	chr15	82334127	82338361	5.12062	2.09233	-1.29121	0.000821971	yes	OK			FUT8	chr14	65877309	66210851	11.666	5.31966	-1.1329	0.000821971	yes	OK			GGT7	chr20	33432521	33460661	47.3765	20.6132	-1.20061	0.000821971	yes	OK
									IER2	chr19	13261281	13265722	352.683	143.91	-1.2932	0.000821971	yes	OK			SCCPDH	chr1	246887377	246931440	53.4694	24.3193	-1.13662	0.000821971	yes	OK			DHX40	chr17	57642885	57685751	13.9684	6.04471	-1.20842	0.000821971	yes	OK
									DYNC1I1	chr7	95401817	95727736	5.2901	2.15855	-1.29323	0.000821971	yes	OK			PLCB1	chr20	8113295	8865549	9.32429	4.23778	-1.13769	0.000821971	yes	OK			PALLD	chr4	169418216	169849627	8.40437	3.6356	-1.20895	0.000821971	yes	OK
									PCDH1	chr5	141232672	141257944	15.4278	6.28079	-1.29652	0.000821971	yes	OK			KIAA0319L	chr1	35899089	36023037	39.8404	18.0905	-1.139	0.000821971	yes	OK			NFKBIE	chr6	44225902	44233525	17.3378	7.4818	-1.21247	0.000821971	yes	OK
									BID	chr22	18214364	18257431	12.5839	5.11742	-1.29809	0.000821971	yes	OK			GAA	chr17	78075354	78093681	72.0793	32.6822	-1.14108	0.000821971	yes	OK			CASC4	chr15	44580908	44707960	20.8965	9.00823	-1.21395	0.000821971	yes	OK
									ZNF800	chr7	127010102	127032767	5.17962	2.10134	-1.30153	0.000821971	yes	OK			SDC2	chr8	97505881	97624037	17.8781	8.06615	-1.14824	0.000821971	yes	OK			SRC	chr20	35973087	36033872	27.0714	11.6661	-1.21445	0.000821971	yes	OK
									HDGF	chr1	156711898	156722240	139.048	56.3668	-1.30267	0.000821971	yes	OK			PHKB	chr16	47495209	47735434	18.3868	8.27531	-1.15179	0.000821971	yes	OK			SGCE	chr7	94214506	94285521	36.4221	15.6282	-1.22066	0.000821971	yes	OK
									FUCA2	chr6	143815030	143833398	42.9571	17.4066	-1.30327	0.000821971	yes	OK			IP6K1	chr3	49761724	49823973	23.2664	10.4702	-1.15195	0.000821971	yes	OK			LRP3	chr19	33685598	33716756	30.0931	12.8565	-1.22694	0.000821971	yes	OK
									FAM127C	chrX	134153224	134156652	22.9771	9.2863	-1.30702	0.000821971	yes	OK			NAA40	chr11	63706441	63725049	19.2041	8.63732	-1.15276	0.000821971	yes	OK			HMG20A	chr15	77712980	77778037	20.9836	8.95794	-1.22802	0.000821971	yes	OK
									WDR60	chr7	158649268	158738883	6.06285	2.4488	-1.30792	0.000821971	yes	OK			ATP2B4	chr1	203595852	203713210	8.38669	3.76929	-1.15381	0.000821971	yes	OK			SLC39A13	chr11	47430045	47438107	44.5352	19.003	-1.22872	0.000821971	yes	OK
									KLHL26	chr19	18747837	18782521	8.48045	3.42206	-1.30928	0.000821971	yes	OK			PPM1F	chr22	22273791	22307250	12.1579	5.46248	-1.15427	0.000821971	yes	OK			LANCL1	chr2	211295971	211342186	12.9181	5.50623	-1.23026	0.000821971	yes	OK
									HMGCL	chr1	24128359	24152668	38.7891	15.6521	-1.3093	0.000821971	yes	OK			KIF21A	chr12	39687028	39837233	6.77121	3.0421	-1.15435	0.000821971	yes	OK			ATP2B4	chr1	203595852	203713210	8.38669	3.57143	-1.2316	0.000821971	yes	OK
									B3GALNT1	chr3	160801669	160823160	5.42134	2.18616	-1.31025	0.000821971	yes	OK			QKI	chr6	163835630	163999628	20.9934	9.3972	-1.15964	0.000821971	yes	OK			SH3GLB2	chr9	131769987	131790579	49.0294	20.8429	-1.23409	0.000821971	yes	OK
									FILIP1	chr6	76005530	76203496	9.93623	4.0021	-1.31194	0.000821971	yes	OK			ANXA5	chr4	122588189	122618284	440.242	196.563	-1.16331	0.000821971	yes	OK			ABL1	chr9	133589267	133763062	33.0656	14.0196	-1.23788	0.000821971	yes	OK
									PTK7	chr6	43044028	43129457	83.3628	33.4317	-1.31819	0.000821971	yes	OK			PTMS	chr12	6875540	6880118	726.112	324.199	-1.16331	0.000821971	yes	OK			GABARAP	chr17	7143625	7145753	342.324	144.994	-1.23937	0.000821971	yes	OK
									SLC30A8	chr8	117962511	118188953	3.51531	1.40815	-1.31986	0.000821971	yes	OK			TMEM216	chr11	61159831	61166335	35.2847	15.722	-1.16626	0.000821971	yes	OK			TSPYL4	chr6	116571070	116575261	10.0143	4.24016	-1.23987	0.000821971	yes	OK
									CYR61	chr1	86046443	86049648	28.4774	11.3751	-1.32394	0.000821971	yes	OK			PLD3	chr19	40826966	40884397	364.195	162.064	-1.16815	0.000821971	yes	OK			AP1M1	chr19	16308664	16346186	79.4677	33.4598	-1.24794	0.000821971	yes	OK
									PGAP3	chr17	37827373	37844310	16.2108	6.47308	-1.32443	0.000821971	yes	OK			QPRT,SPN	chr16	29674299	29710022	202.335	89.8668	-1.17089	0.000821971	yes	OK			CFL2	chr14	35179534	35184029	15.1279	6.34895	-1.25263	0.000821971	yes	OK
									PCBD1	chr10	72643265	72648541	33.7888	13.4724	-1.32653	0.000821971	yes	OK			HABP4	chr9	99212413	99253645	30.7897	13.6224	-1.17647	0.000821971	yes	OK			ZCCHC3	chr20	277703	298449	35.8141	15.0134	-1.25428	0.000821971	yes	OK
									PTPRS	chr19	5205457	5340823	26.4655	10.5405	-1.32817	0.000821971	yes	OK			PDLIM7	chr5	176910324	176924606	277.741	122.828	-1.1771	0.000821971	yes	OK			TCEA2	chr20	62688438	62703701	73.8762	30.9082	-1.25712	0.000821971	yes	OK
									XPA	chr9	100437190	100459691	16.6315	6.59895	-1.33361	0.000821971	yes	OK			RHBDD2	chr7	75508316	75536405	77.8108	34.4099	-1.17714	0.000821971	yes	OK			UBE2R2	chr9	33817181	33920401	23.699	9.88819	-1.26105	0.000821971	yes	OK
									ZMYND11	chr10	180404	300590	12.6006	4.99154	-1.33593	0.000821971	yes	OK			NFKBIE	chr6	44225902	44233525	17.3378	7.6281	-1.18453	0.000821971	yes	OK			SLC1A6	chr19	15060848	15090626	18.0394	7.5223	-1.26191	0.000821971	yes	OK
									MAGED1	chrX	51546154	51645450	177.103	70.1295	-1.3365	0.000821971	yes	OK			RPS6KA3	chrX	20168028	20285075	3.6614	1.60242	-1.19214	0.000821971	yes	OK			TPP1	chr11	6633996	6640692	32.1779	13.4111	-1.26264	0.000821971	yes	OK
									IRAK1	chrX	153275951	153285348	76.6093	30.2467	-1.34074	0.000821971	yes	OK			FBLN2	chr3	13590624	13679922	62.0133	27.113	-1.19359	0.000821971	yes	OK			PTBP2	chr1	97187174	97280605	11.4978	4.78828	-1.26377	0.000821971	yes	OK
									CTGF	chr6	132269313	132272518	31.8851	12.5688	-1.34304	0.000821971	yes	OK			RAB8B	chr15	63481727	63559976	10.9601	4.78886	-1.1945	0.000821971	yes	OK			CCNY	chr10	35535952	35871596	22.8519	9.51239	-1.26443	0.000821971	yes	OK
									RFTN2	chr2	198435475	198540660	6.14121	2.419	-1.34411	0.000821971	yes	OK			NCOA6	chr20	33302577	33413462	10.2944	4.48234	-1.19954	0.000821971	yes	OK			FHL1	chrX	135228860	135293598	13.8654	5.76503	-1.26609	0.000821971	yes	OK
									ADAM15	chr1	155006281	155042127	63.3058	24.861	-1.34845	0.000821971	yes	OK			CDK5RAP3	chr17	46048413	46059260	60.8813	26.486	-1.20077	0.000821971	yes	OK			PIK3AP1	chr10	98352556	98480279	33.8855	14.0746	-1.26758	0.000821971	yes	OK
									PDLIM7	chr5	176910324	176924606	277.741	108.796	-1.35212	0.000821971	yes	OK			CPD	chr17	28705941	28796675	17.5955	7.62501	-1.20639	0.000821971	yes	OK			SLC25A24	chr1	108677356	108926368	20.6618	8.56398	-1.27061	0.000821971	yes	OK
									CLU	chr8	27454433	27472328	159.723	62.5112	-1.35338	0.000821971	yes	OK			SLC35F1	chr6	118228688	118638839	6.46237	2.79775	-1.20779	0.000821971	yes	OK			CD276	chr15	73976583	74006928	111.085	46.0412	-1.27067	0.000821971	yes	OK
									PROS1	chr3	93591880	93692934	10.83	4.23818	-1.35351	0.000821971	yes	OK			CMTM3	chr16	66636579	66647801	73.5338	31.722	-1.21292	0.000821971	yes	OK			MAGED2,TRO	chrX	54834170	54957875	259.348	107.477	-1.27086	0.000821971	yes	OK
									PDE6B	chr4	619362	664681	6.6118	2.58192	-1.3566	0.000821971	yes	OK			STRA6	chr15	74471800	74502046	21.8661	9.38614	-1.22009	0.000821971	yes	OK			TNIP1	chr5	150409501	150467221	18.2195	7.54684	-1.27154	0.000821971	yes	OK
									SLC43A3	chr11	57174425	57195053	17.6952	6.88466	-1.3619	0.000821971	yes	OK			CCNI	chr4	77968249	77997471	131.861	56.5803	-1.22065	0.000821971	yes	OK			SLC16A9	chr10	61410486	61470035	16.6709	6.90297	-1.27205	0.000821971	yes	OK
									ZFAND3	chr6	37787263	38122399	14.0145	5.44643	-1.36353	0.000821971	yes	OK			COMMD8	chr4	47452807	47465676	24.6003	10.5222	-1.22524	0.000821971	yes	OK			MAGED1	chrX	51546154	51645450	177.103	73.166	-1.27535	0.000821971	yes	OK
									IGSF9	chr1	159896739	159915729	47.2403	18.2841	-1.36943	0.000821971	yes	OK			CITED4	chr1	41326727	41328018	96.0367	41.0661	-1.22564	0.000821971	yes	OK			BCAT1	chr12	24952193	25102393	40.0038	16.5003	-1.27764	0.000821971	yes	OK
									APLP1	chr19	36359400	36370700	95.2511	36.8137	-1.37149	0.000821971	yes	OK			C10orf58	chr10	82167584	82193072	95.2122	40.7121	-1.22569	0.000821971	yes	OK			DHRS13,FLOT2	chr17	27206265	27230089	98.4749	40.6128	-1.27782	0.000821971	yes	OK
									FLNC	chr7	128470456	128499328	7.59791	2.93613	-1.37168	0.000821971	yes	OK			LIPG	chr18	47088426	47119278	6.5929	2.8059	-1.23245	0.000821971	yes	OK			TSC22D1	chr13	45006278	45154568	55.296	22.7984	-1.27824	0.000821971	yes	OK
									FAM189B	chr1	155216974	155225329	54.2001	20.9096	-1.37413	0.000821971	yes	OK			CCDC23	chr1	43272292	43311611	64.9971	27.6329	-1.23399	0.000821971	yes	OK			FNBP1	chr9	132649465	132805492	21.6691	8.92588	-1.27957	0.000821971	yes	OK
									MDK	chr11	46402617	46405556	1867.76	720.294	-1.37465	0.000821971	yes	OK			INPPL1	chr11	71935015	71955220	37.7463	16.036	-1.23502	0.000821971	yes	OK			ZNF33B	chr10	43084516	43134090	4.17785	1.72064	-1.27982	0.000821971	yes	OK
									COL5A2	chr2	189896640	190044605	7.98509	3.07888	-1.3749	0.000821971	yes	OK			TMSB4X	chrX	12993225	12995346	991.759	418.501	-1.24476	0.000821971	yes	OK			KCTD20	chr6	36358328	36458920	18.2634	7.51992	-1.28017	0.000821971	yes	OK
									FAM171A2	chr17	42430580	42441235	126.196	48.6525	-1.37508	0.000821971	yes	OK			C4orf48	chr4	2043719	2045697	241.831	101.998	-1.24547	0.000821971	yes	OK			FZD10	chr12	130647003	130650285	18.1547	7.47089	-1.281	0.000821971	yes	OK
									ALDH6A1	chr14	74486058	74551196	20.2678	7.79794	-1.37803	0.000821971	yes	OK			TSPAN3	chr15	77336359	77363570	85.3538	35.9978	-1.24555	0.000821971	yes	OK			HMGCL	chr1	24128359	24152668	38.7891	15.9379	-1.28319	0.000821971	yes	OK
									POLR3GL	chr1	145456078	145475647	21.1865	8.14519	-1.37913	0.000821971	yes	OK			CUEDC1	chr17	55938946	55980750	10.7714	4.53195	-1.24901	0.000821971	yes	OK			NIPSNAP3A,NIPSNAP3B	chr9	107509871	107536291	17.2895	7.0987	-1.28427	0.000821971	yes	OK
									SC5DL	chr11	121163387	121184119	35.0059	13.3952	-1.38588	0.000821971	yes	OK			MEX3A	chr1	156041713	156052394	12.6023	5.29697	-1.25044	0.000821971	yes	OK			CHMP7	chr8	23101149	23119518	27.9325	11.4616	-1.28514	0.000821971	yes	OK
									PRR24	chr19	47777658	47778980	47.8455	18.2708	-1.38884	0.000821971	yes	OK			KIAA0355	chr19	34745455	34846471	5.85029	2.45345	-1.2537	0.000821971	yes	OK			C9orf30,C9orf30-TMEFF1,TMEFF1	chr9	103189494	103340266	98.1615	40.2465	-1.28629	0.000821971	yes	OK
									PKIG	chr20	43160435	43247678	57.8129	22.0323	-1.39177	0.000821971	yes	OK			CENPV	chr17	16243315	16256972	256.962	107.556	-1.25647	0.000821971	yes	OK			LOC550643	chrX	56755630	56845315	117.2	48.023	-1.28718	0.000821971	yes	OK
									LOXL2	chr8	23154393	23261722	49.0157	18.669	-1.3926	0.000821971	yes	OK			PHF6	chrX	133507309	133562822	38.2767	16.0013	-1.25828	0.000821971	yes	OK			PROS1	chr3	93591880	93692934	10.83	4.42922	-1.2899	0.000821971	yes	OK
									GGT7	chr20	33432521	33460661	47.3765	18.0147	-1.395	0.000821971	yes	OK			SPOP	chr17	47676245	47755525	16.9046	7.06608	-1.25843	0.000821971	yes	OK			NCOA2	chr8	71021995	71316020	2.97062	1.21324	-1.2919	0.000821971	yes	OK
									ADAM23	chr2	207308234	207485864	17.2848	6.5704	-1.39545	0.000821971	yes	OK			MIR2964A,URM1	chr9	131133575	131155608	138.18	57.5559	-1.26351	0.000821971	yes	OK			CD24	chrY	21094427	21239302	272.906	111.352	-1.29328	0.000821971	yes	OK
									WNT10B	chr12	49359120	49365641	5.8081	2.20102	-1.39989	0.000821971	yes	OK			IFT80	chr3	159974773	160117320	6.84875	2.85139	-1.26418	0.000821971	yes	OK			ENPP4	chr6	46097700	46114436	4.09039	1.66832	-1.29385	0.000821971	yes	OK
									SPAG16	chr2	214149115	215275225	15.3326	5.80655	-1.40085	0.000821971	yes	OK			RAB36	chr22	23487512	23506531	4.0125	1.6696	-1.265	0.000821971	yes	OK			RBMXL2	chr11	7110164	7113520	29.1415	11.8699	-1.29577	0.000821971	yes	OK
									DDHD2	chr8	38089008	38120320	17.1156	6.47222	-1.40298	0.000821971	yes	OK			PROS1	chr3	93591880	93692934	10.83	4.50268	-1.26617	0.000821971	yes	OK			MIR2964A,URM1	chr9	131133575	131155608	138.18	56.2349	-1.29701	0.000821971	yes	OK
									TSC22D3	chrX	106956451	107019017	18.8453	7.12578	-1.40309	0.000821971	yes	OK			RELB	chr19	45504706	45541489	24.5023	10.1809	-1.26705	0.000821971	yes	OK			PHYH	chr10	13319594	13342130	24.8293	10.0644	-1.30279	0.000821971	yes	OK
									PPP1R3F	chrX	49126284	49157940	23.9046	9.03725	-1.40333	0.000821971	yes	OK			KLHL8	chr4	88081606	88141701	7.71409	3.20359	-1.26781	0.000821971	yes	OK			DPYSL2	chr8	26371708	26515693	98.7512	39.9802	-1.30451	0.000821971	yes	OK
									RNU86,RPL3,SNORD83A,SNORD83B	chr22	39708886	39716343	1162.43	439.028	-1.40475	0.000821971	yes	OK			DNMBP	chr10	101635332	101769676	10.7794	4.47604	-1.26798	0.000821971	yes	OK			FARP1	chr13	98795390	99102068	18.3171	7.41279	-1.3051	0.000821971	yes	OK
									WDTC1	chr1	27561006	27635110	4.21492	1.58747	-1.40878	0.000821971	yes	OK			SLC39A13	chr11	47430045	47438107	44.5352	18.4761	-1.26929	0.000821971	yes	OK			FAM195B	chr17	79780227	79791167	156.558	63.3013	-1.30639	0.000821971	yes	OK
									HIPK2	chr7	139246315	139477693	2.05389	0.773361	-1.40915	0.000821971	yes	OK			DERA	chr12	16064185	16190315	48.9392	20.3023	-1.26935	0.000821971	yes	OK			TRAF3	chr14	103243815	103377837	2.37242	0.957559	-1.30893	0.000821971	yes	OK
									BEND5	chr1	48988352	50489626	11.4869	4.32312	-1.40984	0.000821971	yes	OK			ZNF629	chr16	30789609	30798523	7.16291	2.96731	-1.27139	0.000821971	yes	OK			HSF2	chr6	122720695	122754441	21.86	8.82137	-1.30922	0.000821971	yes	OK
									CDC42EP3	chr2	37858132	37899747	16.2134	6.10049	-1.41019	0.000821971	yes	OK			KCTD7	chr7	66093867	66108216	4.35863	1.80424	-1.27249	0.000821971	yes	OK			PP7080,SLC9A3	chr5	470459	524549	21.132	8.51549	-1.31127	0.000821971	yes	OK
									SPATA7	chr14	88851987	88904804	5.89175	2.21512	-1.41131	0.000821971	yes	OK			ITGA5	chr12	54789043	54813061	23.0903	9.53576	-1.27587	0.000821971	yes	OK			CBX2	chr17	77751943	77762183	48.1082	19.3838	-1.31143	0.000821971	yes	OK
									MXRA7	chr17	74671808	74707056	21.0674	7.91396	-1.41254	0.000821971	yes	OK			HEG1	chr3	124684533	124774866	3.27433	1.34443	-1.2842	0.000821971	yes	OK			ROR2	chr9	94484877	94712444	15.1265	6.08017	-1.3149	0.000821971	yes	OK
									PCYOX1L	chr5	148737569	148749221	23.3513	8.75814	-1.41481	0.000821971	yes	OK			GALC	chr14	88399357	88460009	8.86614	3.63746	-1.28537	0.000821971	yes	OK			ANXA5	chr4	122588189	122618284	440.242	176.808	-1.31612	0.000821971	yes	OK
									PTMS	chr12	6875540	6880118	726.112	271.792	-1.41769	0.000821971	yes	OK			LAMB2	chr3	49158544	49170599	61.4135	25.1322	-1.28902	0.000821971	yes	OK			EXOC4	chr7	132937822	133750513	22.0353	8.84523	-1.31685	0.000821971	yes	OK
									ABCA3	chr16	2325818	2390768	31.6183	11.8281	-1.41854	0.000821971	yes	OK			RGS12	chr4	3294802	3441640	11.5972	4.74203	-1.2902	0.000821971	yes	OK			KIF1A	chr2	241653180	241760776	10.8393	4.34072	-1.32026	0.000821971	yes	OK
									KDM5D	chrY	21867230	21906825	8.1419	3.04496	-1.41894	0.000821971	yes	OK			EFNA3	chr1	155051347	155060171	21.3291	8.72089	-1.29028	0.000821971	yes	OK			TXNDC16	chr14	52897307	53019301	4.54657	1.81853	-1.322	0.000821971	yes	OK
									LYRM1	chr16	20868935	20936329	31.2712	11.6749	-1.42142	0.000821971	yes	OK			ARHGAP18	chr6	129898239	130031370	2.83438	1.15861	-1.29064	0.000821971	yes	OK			SLC39A8	chr4	103172197	103266655	9.92245	3.96574	-1.32311	0.000821971	yes	OK
									RBMXL2	chr11	7110164	7113520	29.1415	10.8597	-1.42409	0.000821971	yes	OK			PTPRS	chr19	5205457	5340823	26.4655	10.7972	-1.29346	0.000821971	yes	OK			MLL5	chr7	104618910	104755960	8.54826	3.4118	-1.3251	0.000821971	yes	OK
									ROBO3	chr11	124735304	124751370	14.5462	5.41656	-1.4252	0.000821971	yes	OK			GLCCI1	chr7	8008373	8128709	5.88547	2.39521	-1.29701	0.000821971	yes	OK			COMMD8	chr4	47452807	47465676	24.6003	9.81772	-1.32522	0.000821971	yes	OK
									CD276	chr15	73976583	74006928	111.085	41.3492	-1.42573	0.000821971	yes	OK			RPRML	chr17	45055394	45056789	79.8812	32.459	-1.29924	0.000821971	yes	OK			CRYZL1	chr21	34961553	35014160	29.9597	11.9425	-1.32692	0.000821971	yes	OK
									C17orf96	chr17	36827958	36831187	6.01761	2.23976	-1.42585	0.000821971	yes	OK			GOLM1	chr9	88555999	88715116	153.878	62.5137	-1.29955	0.000821971	yes	OK			BCKDHB	chr6	80816343	81056126	41.4417	16.5176	-1.32708	0.000821971	yes	OK
									SGSH	chr17	78152280	78194199	20.586	7.6497	-1.42819	0.000821971	yes	OK			HP1BP3	chr1	21068881	21114033	57.4902	23.3453	-1.30018	0.000821971	yes	OK			BID	chr22	18214364	18257431	12.5839	5.01376	-1.32761	0.000821971	yes	OK
									TTC3	chr21	38445534	38575458	12.3495	4.58678	-1.4289	0.000821971	yes	OK			ADAM15	chr1	155006281	155042127	63.3058	25.7029	-1.3004	0.000821971	yes	OK			GPR98	chr5	89854616	90460105	1.04805	0.417028	-1.3295	0.000821971	yes	OK
									TMSB15A	chrX	101768609	101771699	178.585	66.3272	-1.42894	0.000821971	yes	OK			NADKD1	chr5	36192693	36242258	10.581	4.29007	-1.30241	0.000821971	yes	OK			MMAB	chr12	109991520	110011358	16.6289	6.60862	-1.33128	0.000821971	yes	OK
									PTGES	chr9	132500614	132515344	6.72551	2.49624	-1.42988	0.000821971	yes	OK			FAM127A	chrX	134166310	134168293	189.24	76.7241	-1.30246	0.000821971	yes	OK			SYNGR1	chr22	39745953	39781593	26.9715	10.7128	-1.33209	0.000821971	yes	OK
									PLXNA3	chrX	153686622	153701985	6.84348	2.53432	-1.43313	0.000821971	yes	OK			NEO1	chr15	73344267	73597547	7.29396	2.95669	-1.30272	0.000821971	yes	OK			PDIK1L	chr1	26437655	26452039	2.5301	0.998385	-1.34153	0.000821971	yes	OK
									KCND1	chrX	48818638	48828251	3.62363	1.34065	-1.4345	0.000821971	yes	OK			HDAC6	chrX	48660247	48683387	45.796	18.537	-1.30482	0.000821971	yes	OK			FZD9	chr7	72848108	72850450	21.5038	8.48222	-1.34208	0.000821971	yes	OK
									MACROD1	chr11	63766027	63933620	55.0249	20.3423	-1.4356	0.000821971	yes	OK			LRIG1	chr3	66119284	66551463	89.8093	36.3433	-1.30518	0.000821971	yes	OK			KLHL8	chr4	88081606	88141701	7.71409	3.03453	-1.34602	0.000821971	yes	OK
									PODXL2	chr3	127348038	127391652	88.5257	32.7244	-1.43573	0.000821971	yes	OK			IRAK1	chrX	153275951	153285348	76.6093	30.9881	-1.30581	0.000821971	yes	OK			C7orf46	chr7	23719488	23742317	11.9173	4.68793	-1.34604	0.000821971	yes	OK
									VANGL2	chr1	160370363	160398531	22.9614	8.48146	-1.43683	0.000821971	yes	OK			ZNF428	chr19	44111375	44125446	56.9397	22.9977	-1.30794	0.000821971	yes	OK			FBXL14	chr12	1675158	1704001	20.4702	8.03914	-1.34842	0.000821971	yes	OK
									SHF	chr15	45459411	45493373	12.4918	4.60715	-1.43904	0.000821971	yes	OK			CCNG2	chr4	78078356	78091213	4.88949	1.97046	-1.31115	0.000821971	yes	OK			RELB	chr19	45504706	45541489	24.5023	9.61665	-1.34931	0.000821971	yes	OK
									LZTS2	chr10	102756863	102790914	59.4881	21.9184	-1.44046	0.000821971	yes	OK			C5orf30	chr5	102594441	102614361	15.459	6.22743	-1.31173	0.000821971	yes	OK			SDC2	chr8	97505881	97624037	17.8781	7.01552	-1.34957	0.000821971	yes	OK
									TNFRSF10A,TNFRSF10B,TNFRSF10D	chr8	22844929	23082680	70.1021	25.7967	-1.44227	0.000821971	yes	OK			SIAH2	chr3	150458898	150481263	15.909	6.40863	-1.31175	0.000821971	yes	OK			QPRT,SPN	chr16	29674299	29710022	202.335	79.1489	-1.35411	0.000821971	yes	OK
									MFGE8	chr15	89420518	89456672	56.747	20.8511	-1.44443	0.000821971	yes	OK			GHDC	chr17	40341042	40346550	19.8008	7.96818	-1.31323	0.000821971	yes	OK			ULK3	chr15	75128389	75135581	41.56	16.2362	-1.35599	0.000821971	yes	OK
									ZNF385A	chr12	54762915	54785083	8.65008	3.17468	-1.4461	0.000821971	yes	OK			BMI1,COMMD3,COMMD3-BMI1	chr10	22605311	22620469	33.6698	13.5204	-1.31632	0.000821971	yes	OK			LHFPL2	chr5	77781037	77944648	5.2306	2.04278	-1.35645	0.000821971	yes	OK
									CRAT	chr9	131857070	131873070	12.2842	4.50792	-1.44627	0.000821971	yes	OK			SRC	chr20	35973087	36033872	27.0714	10.8544	-1.31849	0.000821971	yes	OK			GSTM1,GSTM2,GSTM4,GSTM5	chr1	110198697	110260890	32.2896	12.6057	-1.35699	0.000821971	yes	OK
									HTR7	chr10	92500575	92617671	9.12065	3.34499	-1.44713	0.000821971	yes	OK			UBE2E3	chr2	181845111	181928352	49.8613	19.9606	-1.32077	0.000821971	yes	OK			ACPL2	chr3	140950681	141013611	9.62355	3.75448	-1.35796	0.000821971	yes	OK
									SPTBN2	chr11	66448779	66495648	5.84589	2.13692	-1.45189	0.000821971	yes	OK			GRASP	chr12	52400747	52409724	20.5567	8.22778	-1.32104	0.000821971	yes	OK			LMF1	chr16	903634	1031523	12.2392	4.77429	-1.35815	0.000821971	yes	OK
									GALNT2	chr1	230202955	230417875	77.5349	28.2626	-1.45595	0.000821971	yes	OK			CBY1	chr22	38974124	39070012	39.1321	15.6358	-1.3235	0.000821971	yes	OK			CCNG2	chr4	78078356	78091213	4.88949	1.90621	-1.35898	0.000821971	yes	OK
									COL1A2	chr7	94023872	94060544	36.5412	13.2763	-1.46067	0.000821971	yes	OK			PODXL2	chr3	127348038	127391652	88.5257	35.3646	-1.32379	0.000821971	yes	OK			ODZ3	chr4	183060095	183727358	18.5531	7.22193	-1.3612	0.000821971	yes	OK
									FAM188B,INMT,INMT-FAM188B	chr7	30791750	30932002	3.8668	1.40348	-1.46213	0.000821971	yes	OK			RAB40B	chr17	80614813	80656598	15.8428	6.32797	-1.32401	0.000821971	yes	OK			CHD7	chr8	61591292	61780586	13.6296	5.29695	-1.36351	0.000821971	yes	OK
									NKAIN1	chr1	31652133	31712779	24.559	8.91379	-1.46214	0.000821971	yes	OK			MAGED1	chrX	51546154	51645450	177.103	70.5981	-1.32689	0.000821971	yes	OK			FIZ1	chr19	56102736	56110893	15.162	5.88861	-1.36446	0.000821971	yes	OK
									TET3	chr2	74273449	74335302	1.62965	0.591416	-1.46232	0.000821971	yes	OK			DCTN3	chr9	34613539	34620496	54.1121	21.4006	-1.3383	0.000821971	yes	OK			PSME1	chr14	24605364	24610831	109.553	42.5478	-1.36447	0.000821971	yes	OK
									SCMH1	chr1	41480261	41707815	14.7395	5.33768	-1.4654	0.000821971	yes	OK			PARVA	chr11	12399025	12556903	3.00388	1.18782	-1.33851	0.000821971	yes	OK			FAM213A	chr10	81805988	81852614	24.7062	9.59057	-1.36518	0.000821971	yes	OK
									SOX21	chr13	95361820	95369086	19.5419	7.05781	-1.46928	0.000821971	yes	OK			PCBD1	chr10	72643265	72648541	33.7888	13.3364	-1.34117	0.000821971	yes	OK			IDH2	chr15	90626301	90645747	110.987	42.9994	-1.368	0.000821971	yes	OK
									MARVELD1	chr10	99473464	99477942	26.014	9.39194	-1.46979	0.000821971	yes	OK			HCG11	chr6	26521933	26527612	3.783	1.49234	-1.34195	0.000821971	yes	OK			SH3BGRL3	chr1	26606212	26608091	265.944	103.023	-1.36816	0.000821971	yes	OK
									PLD3	chr19	40826966	40884397	364.195	131.232	-1.47259	0.000821971	yes	OK			HSF2	chr6	122720695	122754441	21.86	8.61578	-1.34324	0.000821971	yes	OK			WHSC1	chr4	1872961	1983989	26.2017	10.141	-1.36946	0.000821971	yes	OK
									KIAA0319L	chr1	35899089	36023037	39.8404	14.3463	-1.47355	0.000821971	yes	OK			SMO	chr7	128828447	128853482	13.0329	5.12483	-1.34658	0.000821971	yes	OK			FRMD4B	chr3	69219145	69435430	2.97568	1.1515	-1.3697	0.000821971	yes	OK
									SPATA20	chr17	48624561	48633213	14.6417	5.26889	-1.47451	0.000821971	yes	OK			APPL2	chr12	105567074	105630008	15.1954	5.9732	-1.34706	0.000821971	yes	OK			GSTA4	chr6	52828961	52860178	76.4908	29.5754	-1.37089	0.000821971	yes	OK
									GPSM1	chr9	139221931	139254057	17.2056	6.18541	-1.47594	0.000821971	yes	OK			SH3BGRL3	chr1	26606212	26608091	265.944	104.535	-1.34714	0.000821971	yes	OK			NAA40	chr11	63706441	63725049	19.2041	7.42065	-1.3718	0.000821971	yes	OK
									TCF12	chr15	57210805	57582124	65.6786	23.6059	-1.47628	0.000821971	yes	OK			PHF21A	chr11	45950869	46142985	3.81345	1.49825	-1.34782	0.000821971	yes	OK			H2AFY	chr5	134669726	134735577	133.831	51.6684	-1.37306	0.000821971	yes	OK
									LGALS1	chr22	38071612	38075809	181.713	65.276	-1.47704	0.000821971	yes	OK			PACS1	chr11	65837485	66012312	11.7396	4.60001	-1.35167	0.000821971	yes	OK			TBC1D1	chr4	37892704	38140796	12.6203	4.83646	-1.38372	0.000821971	yes	OK
									MOAP1	chr14	93648540	93651249	22.222	7.98047	-1.47744	0.000821971	yes	OK			FIG4	chr6	110012423	110146634	11.4969	4.49533	-1.35474	0.000821971	yes	OK			PCDHGA1,PCDHGA10,PCDHGA11,PCDHGA12,PCDHGA2,PCDHGA3,PCDHGA4,PCDHGA5,PCDHGA6,PCDHGA7,PCDHGA8,PCDHGA9,PCDHGB1,PCDHGB2,PCDHGB3,PCDHGB4,PCDHGB5,PCDHGB6,PCDHGB7,PCDHGC3,PCDHGC4,PCDHGC5	chr5	140710251	140892548	64.453	24.6962	-1.38396	0.000821971	yes	OK
									PI15	chr8	75706303	75767264	4.52536	1.62494	-1.47764	0.000821971	yes	OK			WDR13	chrX	48455879	48463746	35.53	13.8401	-1.36018	0.000821971	yes	OK			TBL2	chr7	72983013	72993013	21.2226	8.12954	-1.38436	0.000821971	yes	OK
									DYNC2LI1	chr2	44001177	44039449	17.5411	6.28922	-1.47978	0.000821971	yes	OK			ENPP4	chr6	46097700	46114436	4.09039	1.59205	-1.36135	0.000821971	yes	OK			TTC8	chr14	89290977	89344335	11.4644	4.39026	-1.38478	0.000821971	yes	OK
									NLRX1	chr11	119039439	119054725	9.23998	3.30301	-1.48411	0.000821971	yes	OK			NES	chr1	156638552	156647189	145.457	56.5808	-1.36221	0.000821971	yes	OK			TSPAN3	chr15	77336359	77363570	85.3538	32.665	-1.38571	0.000821971	yes	OK
									C9orf125	chr9	104234611	104249475	19.0427	6.78952	-1.48785	0.000821971	yes	OK			TBL2	chr7	72983013	72993013	21.2226	8.24932	-1.36326	0.000821971	yes	OK			CST3	chr20	23595967	23618574	647.803	247.784	-1.38648	0.000821971	yes	OK
									DBNDD2,SYS1,SYS1-DBNDD2	chr20	43990576	44039306	46.9073	16.7034	-1.48967	0.000821971	yes	OK			PDLIM4	chr5	131593350	131609147	20.6366	8.02084	-1.36338	0.000821971	yes	OK			PLCB1	chr20	8113295	8865549	9.32429	3.56399	-1.3875	0.000821971	yes	OK
									RRAGB	chrX	55744109	55788512	14.1146	5.02309	-1.49054	0.000821971	yes	OK			USP11	chrX	47092313	47107728	109.183	42.3862	-1.36508	0.000821971	yes	OK			MMP2	chr16	55513080	55540586	43.7427	16.7061	-1.38867	0.000821971	yes	OK
									TSPAN3	chr15	77336359	77363570	85.3538	30.3571	-1.49142	0.000821971	yes	OK			WASF3	chr13	27131839	27263082	10.313	3.99722	-1.3674	0.000821971	yes	OK			CDK5RAP3	chr17	46048413	46059260	60.8813	23.2117	-1.39115	0.000821971	yes	OK
									SPRY2	chr13	80895229	80915086	32.3697	11.5094	-1.49183	0.000821971	yes	OK			GNAI2,GNAT1	chr3	50229042	50296836	358.348	138.88	-1.36753	0.000821971	yes	OK			CYP2U1	chr4	108852716	108874689	6.15526	2.34395	-1.39288	0.000821971	yes	OK
									TCL1B	chr14	96152753	96180533	28.3398	10.072	-1.49249	0.000821971	yes	OK			BTBD9	chr6	38136226	38607924	1.82671	0.707751	-1.36793	0.000821971	yes	OK			ZC4H2	chrX	64135681	64254624	12.4086	4.71889	-1.39482	0.000821971	yes	OK
									TLE4	chr9	82186874	82341730	27.3118	9.69295	-1.49452	0.000821971	yes	OK			ARL6IP5	chr3	69134089	69171746	46.8576	18.142	-1.36895	0.000821971	yes	OK			FAM65A	chr16	67562716	67580691	9.89214	3.7594	-1.39578	0.000821971	yes	OK
									SYT11	chr1	155829259	155854990	13.4728	4.78003	-1.49496	0.000821971	yes	OK			ZER1	chr9	131486740	131534198	18.1897	7.03966	-1.36955	0.000821971	yes	OK			HABP4	chr9	99212413	99253645	30.7897	11.6867	-1.39758	0.000821971	yes	OK
									FBXO17	chr19	39432041	39466380	26.47	9.39106	-1.495	0.000821971	yes	OK			ZNF800	chr7	127010102	127032767	5.17962	2.00105	-1.37209	0.000821971	yes	OK			FUCA2	chr6	143815030	143833398	42.9571	16.3024	-1.39781	0.000821971	yes	OK
									HABP4	chr9	99212413	99253645	30.7897	10.9091	-1.49692	0.000821971	yes	OK			KIRREL	chr1	157963062	158070076	20.98	8.10241	-1.37259	0.000821971	yes	OK			RFXAP	chr13	37393338	37403740	7.62045	2.89159	-1.39801	0.000821971	yes	OK
									CCNG2	chr4	78078356	78091213	4.88949	1.72857	-1.5001	0.000821971	yes	OK			NRCAM	chr7	107788070	108096841	4.18828	1.61073	-1.37864	0.000821971	yes	OK			QKI	chr6	163835630	163999628	20.9934	7.95559	-1.3999	0.000821971	yes	OK
									PKDCC	chr2	42275160	42285668	9.92756	3.50115	-1.50361	0.000821971	yes	OK			HAPLN4	chr19	19366451	19373596	6.24061	2.39956	-1.37891	0.000821971	yes	OK			RAB8B	chr15	63481727	63559976	10.9601	4.14746	-1.40196	0.000821971	yes	OK
									COL5A1	chr9	137533651	137736688	8.35217	2.94527	-1.50375	0.000821971	yes	OK			KLHDC8B	chr3	49208909	49231097	28.2672	10.841	-1.38263	0.000821971	yes	OK			TMEM216	chr11	61159831	61166335	35.2847	13.3451	-1.40273	0.000821971	yes	OK
									FAM213A	chr10	81805988	81852614	24.7062	8.70844	-1.50439	0.000821971	yes	OK			RND2	chr17	41177257	41184070	35.5889	13.6404	-1.38354	0.000821971	yes	OK			GALC	chr14	88399357	88460009	8.86614	3.3526	-1.40303	0.000821971	yes	OK
									RHBDD2	chr7	75508316	75536405	77.8108	27.4127	-1.50512	0.000821971	yes	OK			DNAJC1	chr10	22045476	22292650	12.1049	4.63656	-1.38446	0.000821971	yes	OK			ZNF800	chr7	127010102	127032767	5.17962	1.9508	-1.40878	0.000821971	yes	OK
									GAL3ST3	chr11	65808235	65816651	8.77725	3.08722	-1.50746	0.000821971	yes	OK			MAGEL2	chr15	23888695	23892993	4.04762	1.54969	-1.3851	0.000821971	yes	OK			CTPS2	chrX	16606115	16731059	10.5474	3.96818	-1.41034	0.000821971	yes	OK
									XPR1	chr1	180601145	180859415	11.6121	4.07222	-1.51174	0.000821971	yes	OK			PLAG1	chr8	57073467	57123859	1.22985	0.470594	-1.38592	0.000821971	yes	OK			MPDZ	chr9	13105638	13279662	9.98294	3.7552	-1.41057	0.000821971	yes	OK
									PLA2G6	chr22	38507468	38577836	7.27945	2.54987	-1.51341	0.000821971	yes	OK			RFTN2	chr2	198435475	198540660	6.14121	2.34834	-1.38688	0.000821971	yes	OK			MAP7D1	chr1	36621744	36646526	54.0708	20.3246	-1.41162	0.000821971	yes	OK
									ABAT	chr16	8768443	8878432	3.85975	1.35161	-1.51383	0.000821971	yes	OK			SOX2	chr3	181328150	181460279	126.371	48.3065	-1.38738	0.000821971	yes	OK			USP44	chr12	95910201	95945263	14.3823	5.38935	-1.41611	0.000821971	yes	OK
									FLJ33630	chr5	127276377	127418961	8.46638	2.96037	-1.51597	0.000821971	yes	OK			LEPREL2	chr12	6937571	6949047	43.9544	16.7793	-1.38933	0.000821971	yes	OK			C15orf17	chr15	75192186	75199462	18.2764	6.84466	-1.41693	0.000821971	yes	OK
									DHRS12	chr13	52342113	52379816	8.58004	2.99844	-1.51677	0.000821971	yes	OK			RAB6B	chr3	133543079	133614691	2.06849	0.788455	-1.39148	0.000821971	yes	OK			GNAI2,GNAT1	chr3	50229042	50296836	358.348	133.882	-1.4204	0.000821971	yes	OK
									APPL2	chr12	105567074	105630008	15.1954	5.31014	-1.51681	0.000821971	yes	OK			EVI5L	chr19	7895159	7929862	7.3924	2.8158	-1.3925	0.000821971	yes	OK			FZD6	chr8	104280948	104345096	13.9328	5.20032	-1.42181	0.000821971	yes	OK
									ZNF608	chr5	123972609	124084502	9.91553	3.46126	-1.51839	0.000821971	yes	OK			CNTRL	chr9	123837267	123939886	3.79003	1.44285	-1.39328	0.000821971	yes	OK			LFNG,MIR4648	chr7	2552162	2568810	18.1227	6.76044	-1.42261	0.000821971	yes	OK
									RASL10B	chr17	34058678	34070540	16.1872	5.64999	-1.51853	0.000821971	yes	OK			C5orf54	chr5	159820067	159827060	4.83683	1.83995	-1.39439	0.000821971	yes	OK			BMI1,COMMD3,COMMD3-BMI1	chr10	22605311	22620469	33.6698	12.5557	-1.42312	0.000821971	yes	OK
									CNN1	chr19	11649578	11661199	21.3518	7.43476	-1.522	0.000821971	yes	OK			PPP2R3A	chr3	135684514	135866752	6.13007	2.32691	-1.39749	0.000821971	yes	OK			MOV10	chr1	113217047	113243457	14.2227	5.29684	-1.425	0.000821971	yes	OK
									TEAD3	chr6	35441373	35464861	13.8001	4.80095	-1.52328	0.000821971	yes	OK			ROR2	chr9	94484877	94712444	15.1265	5.74179	-1.39751	0.000821971	yes	OK			RALB	chr2	121010413	121052296	11.9667	4.4507	-1.42692	0.000821971	yes	OK
									SPSB4	chr3	140770742	140867453	11.9794	4.15177	-1.52876	0.000821971	yes	OK			STK40	chr1	36805224	36863546	38.0883	14.4551	-1.39776	0.000821971	yes	OK			BTBD2	chr19	1985392	2028818	61.8817	22.9976	-1.42803	0.000821971	yes	OK
									SLC27A1	chr19	17581299	17616977	5.84386	2.02356	-1.53003	0.000821971	yes	OK			PPP1R3F	chrX	49126284	49157940	23.9046	9.07063	-1.39801	0.000821971	yes	OK			TAF9B	chrX	77385244	77395179	16.3757	6.08335	-1.42862	0.000821971	yes	OK
									TMSB4X	chrX	12993225	12995346	991.759	342.479	-1.53397	0.000821971	yes	OK			FZD10	chr12	130647003	130650285	18.1547	6.88003	-1.39986	0.000821971	yes	OK			PPM1F	chr22	22273791	22307250	12.1579	4.51621	-1.42871	0.000821971	yes	OK
									TMEM106C	chr12	48357329	48362661	58.6553	20.241	-1.53498	0.000821971	yes	OK			FAM115A	chr7	143548460	143599278	3.19543	1.21031	-1.40063	0.000821971	yes	OK			ZNF641	chr12	48733792	48745029	2.39012	0.886174	-1.43142	0.000821971	yes	OK
									TOM1L2	chr17	17746821	17875784	3.91914	1.34866	-1.53901	0.000821971	yes	OK			FZD3	chr8	28351721	28431789	13.4557	5.09137	-1.4021	0.000821971	yes	OK			CMTM3	chr16	66636579	66647801	73.5338	27.1795	-1.43589	0.000821971	yes	OK
									ADAM33	chr20	3648607	3662738	5.4272	1.85939	-1.54538	0.000821971	yes	OK			UBL3	chr13	30338544	30424820	7.73918	2.92292	-1.40477	0.000821971	yes	OK			WDR72	chr15	53805937	54051859	20.9388	7.73632	-1.43646	0.000821971	yes	OK
									GNAZ	chr22	23401592	23484241	8.16518	2.79677	-1.54572	0.000821971	yes	OK			PBXIP1	chr1	154916558	154928567	38.2281	14.4214	-1.40642	0.000821971	yes	OK			LZTS2	chr10	102756863	102790914	59.4881	21.9602	-1.43771	0.000821971	yes	OK
									DPYSL5	chr2	27070968	27173220	31.18	10.6642	-1.54785	0.000821971	yes	OK			PJA1	chrX	68380580	68385365	46.039	17.3659	-1.4066	0.000821971	yes	OK			ZMYND11	chr10	180404	300590	12.6006	4.65104	-1.43787	0.000821971	yes	OK
									SDK1	chr7	3341079	4308631	1.87201	0.640196	-1.548	0.000821971	yes	OK			LDOC1L	chr22	44888449	44894005	9.24409	3.46351	-1.4163	0.000821971	yes	OK			KIAA0355	chr19	34745455	34846471	5.85029	2.15836	-1.43857	0.000821971	yes	OK
									HSF2	chr6	122720695	122754441	21.86	7.4753	-1.54809	0.000821971	yes	OK			GPC2	chr7	99767223	99775007	39.8887	14.9349	-1.41729	0.000821971	yes	OK			MAP1B	chr5	71403117	71505397	48.0424	17.7108	-1.43968	0.000821971	yes	OK
									CXXC5	chr5	139027880	139063469	55.9522	19.0453	-1.55476	0.000821971	yes	OK			COL6A2	chr21	47518032	47552763	112.261	41.9524	-1.42004	0.000821971	yes	OK			HIST2H2BE	chr1	149856009	149858232	8.15809	3.00535	-1.4407	0.000821971	yes	OK
									IL11RA	chr9	34652181	34662689	24.2471	8.24469	-1.55628	0.000821971	yes	OK			PP7080,SLC9A3	chr5	470459	524549	21.132	7.88562	-1.42214	0.000821971	yes	OK			PLD3	chr19	40826966	40884397	364.195	134.062	-1.44181	0.000821971	yes	OK
									ESRRG	chr1	216676587	217311097	2.95718	1.00551	-1.5563	0.000821971	yes	OK			HSPG2	chr1	22138757	22263750	4.81391	1.79555	-1.42278	0.000821971	yes	OK			CPD	chr17	28705941	28796675	17.5955	6.46552	-1.44437	0.000821971	yes	OK
									MEX3A	chr1	156041713	156052394	12.6023	4.28247	-1.55717	0.000821971	yes	OK			DDHD2	chr8	38089008	38120320	17.1156	6.37249	-1.42539	0.000821971	yes	OK			PBXIP1	chr1	154916558	154928567	38.2281	14.047	-1.44437	0.000821971	yes	OK
									PGBD5	chr1	230457310	230562038	15.0083	5.09559	-1.55844	0.000821971	yes	OK			ADAM33	chr20	3648607	3662738	5.4272	2.01865	-1.42682	0.000821971	yes	OK			NIPSNAP1	chr22	29950797	29977326	163.541	60.0755	-1.4448	0.000821971	yes	OK
									MN1	chr22	28140997	28197486	4.54011	1.53916	-1.56059	0.000821971	yes	OK			CTHRC1	chr8	104383742	104395234	37.3252	13.8813	-1.42701	0.000821971	yes	OK			DEAF1	chr11	644125	704363	72.4472	26.5874	-1.44618	0.000821971	yes	OK
									PDIK1L	chr1	26437655	26452039	2.5301	0.857736	-1.56059	0.000821971	yes	OK			NUP210	chr3	13357732	13461809	29.9735	11.1398	-1.42796	0.000821971	yes	OK			LTBP4	chr19	41099071	41144931	50.4157	18.4914	-1.44702	0.000821971	yes	OK
									BBS1	chr11	66278118	66301175	18.8228	6.37847	-1.5612	0.000821971	yes	OK			PDIK1L	chr1	26437655	26452039	2.5301	0.940242	-1.42809	0.000821971	yes	OK			PLA2G3	chr22	31530775	31536469	16.0609	5.88971	-1.44728	0.000821971	yes	OK
									TOX2	chr20	42543491	42698255	5.04459	1.70274	-1.56688	0.000821971	yes	OK			TRERF1	chr6	42192668	42419783	3.11441	1.15681	-1.4288	0.000821971	yes	OK			ZNF428	chr19	44111375	44125446	56.9397	20.8769	-1.44753	0.000821971	yes	OK
									ZDBF2	chr2	207139376	207179152	3.42544	1.15605	-1.56709	0.000821971	yes	OK			PTCH1	chr9	98205263	98279247	2.9338	1.08786	-1.43127	0.000821971	yes	OK			C5orf30	chr5	102594441	102614361	15.459	5.66766	-1.44762	0.000821971	yes	OK
									NPTX2	chr7	98246596	98272473	38.8553	13.1125	-1.56717	0.000821971	yes	OK			ZNF532	chr18	56530060	56653719	10.9712	4.06725	-1.43159	0.000821971	yes	OK			SLC16A2	chrX	73641084	73753752	4.93347	1.80629	-1.44957	0.000821971	yes	OK
									YAP1	chr11	101980524	102104240	10.9802	3.69187	-1.57248	0.000821971	yes	OK			ZNF512	chr2	27805892	27845965	21.1975	7.8537	-1.43245	0.000821971	yes	OK			REPIN1,ZNF775	chr7	150065800	150095723	117.535	42.9755	-1.4515	0.000821971	yes	OK
									DPP7	chr9	140004991	140009195	27.0042	9.06777	-1.57436	0.000821971	yes	OK			CKAP4	chr12	106631656	106641713	109.776	40.6303	-1.43394	0.000821971	yes	OK			MEX3B	chr15	82334127	82338361	5.12062	1.86792	-1.45488	0.000821971	yes	OK
									SNAP91	chr6	84262604	84419127	1.50293	0.504533	-1.57476	0.000821971	yes	OK			CACHD1	chr1	64936475	65158741	52.324	19.332	-1.43648	0.000821971	yes	OK			PDLIM7	chr5	176910324	176924606	277.741	101.301	-1.45508	0.000821971	yes	OK
									CSRP1	chr1	201440132	201476387	41.452	13.8987	-1.57649	0.000821971	yes	OK			MDK	chr11	46402617	46405556	1867.76	690.011	-1.43662	0.000821971	yes	OK			PTPRS	chr19	5205457	5340823	26.4655	9.62499	-1.45926	0.000821971	yes	OK
									SMO	chr7	128828447	128853482	13.0329	4.35905	-1.58007	0.000821971	yes	OK			C22orf32	chr22	42475694	42480288	24.1014	8.90005	-1.43723	0.000821971	yes	OK			SPAG16	chr2	214149115	215275225	15.3326	5.56939	-1.46101	0.000821971	yes	OK
									ZNF423	chr16	49524448	49890055	26.8951	8.99443	-1.58024	0.000821971	yes	OK			ZNF385A	chr12	54762915	54785083	8.65008	3.19265	-1.43796	0.000821971	yes	OK			FYTTD1	chr3	197398156	197511485	30.2738	10.9961	-1.46108	0.000821971	yes	OK
									LAMB2	chr3	49158544	49170599	61.4135	20.5373	-1.58031	0.000821971	yes	OK			CXCL5	chr4	74861358	74864416	3.25563	1.20058	-1.4392	0.000821971	yes	OK			CROCC	chr1	17248444	17299474	14.0164	5.08743	-1.4621	0.000821971	yes	OK
									PPAPDC3	chr9	134165080	134184649	7.66612	2.56176	-1.58136	0.000821971	yes	OK			HS6ST2	chrX	131760037	132095423	5.13501	1.89142	-1.4409	0.000821971	yes	OK			PTCH1	chr9	98205263	98279247	2.9338	1.06457	-1.46249	0.000821971	yes	OK
									SLC9A5	chr16	67282854	67306094	3.91957	1.30859	-1.58268	0.000821971	yes	OK			PPAPDC3	chr9	134165080	134184649	7.66612	2.82161	-1.44198	0.000821971	yes	OK			PLCB2	chr15	40580078	40600174	5.00953	1.8154	-1.46439	0.000821971	yes	OK
									C12orf76	chr12	110478896	110505500	12.5044	4.16955	-1.58448	0.000821971	yes	OK			TUSC3	chr8	15396987	15624974	84.2655	30.9707	-1.44404	0.000821971	yes	OK			FAM161A	chr2	62051982	62081278	5.14084	1.86114	-1.46582	0.000821971	yes	OK
									PDLIM4	chr5	131593350	131609147	20.6366	6.87042	-1.58674	0.000821971	yes	OK			EFNB3	chr17	7608519	7614693	7.03863	2.57931	-1.44831	0.000821971	yes	OK			RGS12	chr4	3294802	3441640	11.5972	4.18521	-1.47041	0.000821971	yes	OK
									TTC17	chr11	43380434	43527791	36.4363	12.1286	-1.58696	0.000821971	yes	OK			IFT81	chr12	110562139	110656600	16.0544	5.85817	-1.45445	0.000821971	yes	OK			MEX3A	chr1	156041713	156052394	12.6023	4.54632	-1.47091	0.000821971	yes	OK
									GALC	chr14	88399357	88460009	8.86614	2.93474	-1.59508	0.000821971	yes	OK			MRVI1	chr11	10562782	10715535	2.89653	1.0555	-1.45639	0.000821971	yes	OK			ARL6IP5	chr3	69134089	69171746	46.8576	16.8493	-1.4756	0.000821971	yes	OK
									GOLM1	chr9	88555999	88715116	153.878	50.8538	-1.59736	0.000821971	yes	OK			EMP2	chr16	10622278	10674539	9.21922	3.35086	-1.46011	0.000821971	yes	OK			LRRC49	chr15	71184927	71342436	3.13986	1.1261	-1.47936	0.000821971	yes	OK
									ZMYM6NB	chr1	35447126	35450948	21.7818	7.18761	-1.59954	0.000821971	yes	OK			ARHGAP23	chr17	36584719	36668628	19.9872	7.26363	-1.46031	0.000821971	yes	OK			MOAP1	chr14	93648540	93651249	22.222	7.94154	-1.4845	0.000821971	yes	OK
									CAPN2	chr1	223889294	223963720	42.922	14.1271	-1.60325	0.000821971	yes	OK			SLC38A5	chrX	48316924	48328644	27.2823	9.89629	-1.46301	0.000821971	yes	OK			KIAA0319L	chr1	35899089	36023037	39.8404	14.236	-1.48469	0.000821971	yes	OK
									ABHD14A,ABHD14A-ACY1,ACY1	chr3	52002525	52023218	49.4542	16.2601	-1.60476	0.000821971	yes	OK			BTBD2	chr19	1985392	2028818	61.8817	22.4424	-1.46329	0.000821971	yes	OK			TMSB4X	chrX	12993225	12995346	991.759	354.135	-1.48569	0.000821971	yes	OK
									HIST1H2BK	chr6	27105897	27114637	26.0135	8.54519	-1.60607	0.000821971	yes	OK			LFNG,MIR4648	chr7	2552162	2568810	18.1227	6.55831	-1.4664	0.000821971	yes	OK			XPA	chr9	100437190	100459691	16.6315	5.9315	-1.48745	0.000821971	yes	OK
									C14orf159	chr14	91337166	91691806	27.7706	9.1105	-1.60796	0.000821971	yes	OK			SEMA4F	chr2	74881392	74909190	5.64834	2.04279	-1.46728	0.000821971	yes	OK			LZTFL1	chr3	45865445	45883621	3.93639	1.4026	-1.48877	0.000821971	yes	OK
									VASH1	chr14	77227856	77249363	15.3952	5.04735	-1.60888	0.000821971	yes	OK			KCTD17	chr22	37447778	37459432	30.091	10.8318	-1.47406	0.000821971	yes	OK			CCND2	chr12	4382901	4414522	53.496	19.0598	-1.4889	0.000821971	yes	OK
									RAB32	chr6	146864827	146876089	12.9007	4.22253	-1.61127	0.000821971	yes	OK			TK2	chr16	66541905	66584315	2.82307	1.01601	-1.47435	0.000821971	yes	OK			F2R	chr5	76011867	76031595	22.4332	7.9757	-1.49195	0.000821971	yes	OK
									SLC29A4	chr7	5322560	5343731	28.0315	9.17232	-1.61169	0.000821971	yes	OK			LOC283481	chr13	102373204	103054124	21.2526	7.63088	-1.47772	0.000821971	yes	OK			TSPAN15	chr10	71211225	71267423	38.23	13.5811	-1.4931	0.000821971	yes	OK
									EFS	chr14	23825610	23834842	8.69893	2.84476	-1.61253	0.000821971	yes	OK			LRRC61	chr7	149944300	150035247	76.6958	27.5326	-1.47801	0.000821971	yes	OK			NEO1	chr15	73344267	73597547	7.29396	2.58659	-1.49565	0.000821971	yes	OK
									NELL2	chr12	44902057	45307711	36.4618	11.9186	-1.61317	0.000821971	yes	OK			EPHX2	chr8	27348518	27402466	21.338	7.65791	-1.4784	0.000821971	yes	OK			CBY1	chr22	38974124	39070012	39.1321	13.8545	-1.498	0.000821971	yes	OK
									TCTEX1D2,TM4SF19,TM4SF19-TCTEX1D2	chr3	196018086	196065291	43.6997	14.2484	-1.61682	0.000821971	yes	OK			SMAD3	chr15	67358052	67487616	10.8719	3.89252	-1.48182	0.000821971	yes	OK			KLHDC10	chr7	129710348	129775560	1.27437	0.450967	-1.49869	0.000821971	yes	OK
									TRERF1	chr6	42192668	42419783	3.11441	1.01516	-1.61724	0.000821971	yes	OK			ANKMY2	chr7	16639398	16685442	13.9018	4.97311	-1.48305	0.000821971	yes	OK			C10orf58	chr10	82167584	82193072	95.2122	33.6695	-1.4997	0.000821971	yes	OK
									BTG2	chr1	203274663	203284573	34.1963	11.1267	-1.61982	0.000821971	yes	OK			RRAGD	chr6	90074334	90121995	6.65373	2.36949	-1.48959	0.000821971	yes	OK			MRVI1	chr11	10562782	10715535	2.89653	1.02398	-1.50013	0.000821971	yes	OK
									FAM50B	chr6	3849631	3851551	12.1046	3.93814	-1.61996	0.000821971	yes	OK			KLHL13	chrX	117031775	117251303	8.06314	2.86616	-1.49222	0.000821971	yes	OK			LAMA1	chr18	6941736	7117813	20.0749	7.08819	-1.50191	0.000821971	yes	OK
									GPC1	chr2	241374826	241407518	76.4779	24.8007	-1.62466	0.000821971	yes	OK			MAP7D1	chr1	36621744	36646526	54.0708	19.1841	-1.49494	0.000821971	yes	OK			HECTD2	chr10	93066718	93371217	4.02948	1.42067	-1.50402	0.000821971	yes	OK
									SCARF2	chr22	20778872	20792146	18.3054	5.92772	-1.62672	0.000821971	yes	OK			TMEM106C	chr12	48357329	48362661	58.6553	20.7686	-1.49786	0.000821971	yes	OK			GAP43	chr3	115342150	115440334	9.18157	3.23664	-1.50424	0.000821971	yes	OK
									FLJ90757	chr17	79002932	79008519	3.82859	1.2367	-1.63031	0.000821971	yes	OK			XPA	chr9	100437190	100459691	16.6315	5.87483	-1.5013	0.000821971	yes	OK			EVI5L	chr19	7895159	7929862	7.3924	2.60402	-1.5053	0.000821971	yes	OK
									ZNF362	chr1	33721951	33766320	16.6752	5.37793	-1.63258	0.000821971	yes	OK			HES1	chr3	193853930	193856401	14.9312	5.27384	-1.5014	0.000821971	yes	OK			PHF21A	chr11	45950869	46142985	3.81345	1.34225	-1.50645	0.000821971	yes	OK
									MOV10	chr1	113217047	113243457	14.2227	4.58204	-1.63414	0.000821971	yes	OK			GPR153	chr1	6307405	6321170	30.3851	10.7253	-1.50235	0.000821971	yes	OK			WDR13	chrX	48455879	48463746	35.53	12.4786	-1.50958	0.000821971	yes	OK
									EXOC6	chr10	94594469	94819251	5.26143	1.69286	-1.636	0.000821971	yes	OK			PARP4	chr13	24995067	25086948	12.6326	4.45417	-1.50392	0.000821971	yes	OK			2008-09-01	chr5	132083136	132113561	7.09477	2.49038	-1.51039	0.000821971	yes	OK
									TCEAL2	chrX	101380659	101382684	10.8892	3.49471	-1.63965	0.000821971	yes	OK			LTBP4	chr19	41099071	41144931	50.4157	17.6882	-1.51109	0.000821971	yes	OK			C8orf83	chr8	93895730	93978372	5.04091	1.76809	-1.5115	0.000821971	yes	OK
									FAM115A	chr7	143548460	143599278	3.19543	1.02333	-1.64274	0.000821971	yes	OK			KCTD21	chr11	77882297	77899664	3.24998	1.13968	-1.51181	0.000821971	yes	OK			INPPL1	chr11	71935015	71955220	37.7463	13.2251	-1.51306	0.000821971	yes	OK
									PP7080,SLC9A3	chr5	470459	524549	21.132	6.75684	-1.64501	0.000821971	yes	OK			STMN2	chr8	80523048	80578495	173.349	60.6548	-1.51498	0.000821971	yes	OK			GYG2	chrX	2746862	2801000	13.567	4.74474	-1.5157	0.000821971	yes	OK
									PLCB1	chr20	8113295	8865549	9.32429	2.97914	-1.6461	0.000821971	yes	OK			SH3BGRL	chrX	80369199	80554325	33.4297	11.6539	-1.52032	0.000821971	yes	OK			AGAP3	chr7	150783556	150841525	58.8833	20.583	-1.51641	0.000821971	yes	OK
									RELB	chr19	45504706	45541489	24.5023	7.81697	-1.64824	0.000821971	yes	OK			CDH2	chr18	25521085	25758017	88.2013	30.6381	-1.52547	0.000821971	yes	OK			GPX7	chr1	53068042	53074723	18.7904	6.56324	-1.51752	0.000821971	yes	OK
									TBL2	chr7	72983013	72993013	21.2226	6.75822	-1.65089	0.000821971	yes	OK			MMP16	chr8	89049459	89339717	0.976378	0.338243	-1.52938	0.000821971	yes	OK			MFAP2	chr1	17300948	17308081	136.814	47.7558	-1.51846	0.000821971	yes	OK
									SIAH2	chr3	150458898	150481263	15.909	5.06542	-1.65109	0.000821971	yes	OK			TOM1L2	chr17	17746821	17875784	3.91914	1.35618	-1.53099	0.000821971	yes	OK			SPOP	chr17	47676245	47755525	16.9046	5.89906	-1.51886	0.000821971	yes	OK
									CSF1	chr1	110453232	110473616	1.76866	0.561823	-1.65447	0.000821971	yes	OK			NAP1L5	chr4	89513646	89629686	14.0204	4.8515	-1.53102	0.000821971	yes	OK			KCTD7	chr7	66093867	66108216	4.35863	1.52006	-1.51975	0.000821971	yes	OK
									ZNF219	chr14	21538368	21572863	51.3746	16.3021	-1.65599	0.000821971	yes	OK			SLC1A6	chr19	15060848	15090626	18.0394	6.23994	-1.53155	0.000821971	yes	OK			ANKMY2	chr7	16639398	16685442	13.9018	4.8475	-1.51996	0.000821971	yes	OK
									PRELID2	chr5	145138581	145214899	7.13902	2.264	-1.65685	0.000821971	yes	OK			ARRDC4	chr15	98503932	98517068	12.4394	4.30163	-1.53196	0.000821971	yes	OK			UBE2E3	chr2	181845111	181928352	49.8613	17.3739	-1.521	0.000821971	yes	OK
									SSFA2	chr2	182756471	182795466	3.95336	1.25029	-1.66082	0.000821971	yes	OK			GNG7	chr19	2511217	2702746	4.5204	1.56224	-1.53284	0.000821971	yes	OK			FAM127A	chrX	134166310	134168293	189.24	65.9355	-1.52109	0.000821971	yes	OK
									MSRB2	chr10	23384426	23411305	14.3342	4.52328	-1.66402	0.000821971	yes	OK			BIN1	chr2	127805598	127864914	39.9252	13.792	-1.53347	0.000821971	yes	OK			WASF3	chr13	27131839	27263082	10.313	3.59321	-1.52112	0.000821971	yes	OK
									TTLL1	chr22	43435321	43485434	14.6356	4.61717	-1.6644	0.000821971	yes	OK			IFI16,PYHIN1	chr1	158901336	159024946	166.649	57.5558	-1.53378	0.000821971	yes	OK			SFRP2	chr4	154701741	154710228	172.623	60.1385	-1.52126	0.000821971	yes	OK
									DAZAP2	chr12	51632507	51665239	72.4734	22.837	-1.66608	0.000821971	yes	OK			OLFML2B	chr1	161952930	161993644	8.92847	3.07956	-1.53569	0.000821971	yes	OK			OAF	chr11	120081746	120100650	19.2697	6.67562	-1.52936	0.000821971	yes	OK
									HLA-A	chr6_ssto_hap7	1225498	1243012	7.66223	2.40777	-1.67007	0.000821971	yes	OK			NFATC4	chr14	24836144	24848810	8.90041	3.06982	-1.53572	0.000821971	yes	OK			RND2	chr17	41177257	41184070	35.5889	12.3082	-1.53181	0.000821971	yes	OK
									DUSP1	chr5	172194444	172198203	35.5312	11.1565	-1.6712	0.000821971	yes	OK			KCNQ2	chr20	62037541	62103993	147.344	50.7827	-1.53678	0.000821971	yes	OK			IFT80	chr3	159974773	160117320	6.84875	2.36754	-1.53245	0.000821971	yes	OK
									RAPGEFL1	chr17	38334241	38351906	2.31903	0.726439	-1.67461	0.000821971	yes	OK			CROCC	chr1	17248444	17299474	14.0164	4.7948	-1.54757	0.000821971	yes	OK			ZER1	chr9	131486740	131534198	18.1897	6.28483	-1.53318	0.000821971	yes	OK
									C2CD2	chr21	43305218	43374068	3.84214	1.20306	-1.6752	0.000821971	yes	OK			LHPP	chr10	126150340	126302710	14.6803	5.01944	-1.54828	0.000821971	yes	OK			ZNF629	chr16	30789609	30798523	7.16291	2.47382	-1.53381	0.000821971	yes	OK
									HTRA3	chr4	8271488	8308838	7.02355	2.19242	-1.67968	0.000821971	yes	OK			ZNF423	chr16	49524448	49890055	26.8951	9.19564	-1.54832	0.000821971	yes	OK			NUDT7	chr16	77756388	77776229	14.7471	5.08656	-1.53567	0.000821971	yes	OK
									SCCPDH	chr1	246887377	246931440	53.4694	16.6869	-1.67999	0.000821971	yes	OK			SPTBN2	chr11	66448779	66495648	5.84589	1.9973	-1.54937	0.000821971	yes	OK			CTNNBIP1	chr1	9908331	9970316	20.8224	7.17067	-1.53795	0.000821971	yes	OK
									KCTD18	chr2	201353679	201374792	5.2007	1.62206	-1.68088	0.000821971	yes	OK			MSRB2	chr10	23384426	23411305	14.3342	4.89176	-1.55103	0.000821971	yes	OK			SLC35F1	chr6	118228688	118638839	6.46237	2.2224	-1.53994	0.000821971	yes	OK
									FLJ31485	chr12	130636077	130646845	2.80159	0.87202	-1.68381	0.000821971	yes	OK			HIP1	chr7	75162617	75368283	11.6654	3.97718	-1.55241	0.000821971	yes	OK			HP1BP3	chr1	21068881	21114033	57.4902	19.686	-1.54615	0.000821971	yes	OK
									TUSC3	chr8	15396987	15624974	84.2655	26.1969	-1.68554	0.000821971	yes	OK			WDR60	chr7	158649268	158738883	6.06285	2.06608	-1.5531	0.000821971	yes	OK			ZNF385A	chr12	54762915	54785083	8.65008	2.96021	-1.54701	0.000821971	yes	OK
									PNMAL1	chr19	46969747	46974820	19.6848	6.11262	-1.68722	0.000821971	yes	OK			B2M	chr15	45003684	45010357	656.75	223.445	-1.55542	0.000821971	yes	OK			DAGLA	chr11	61447904	61514474	3.99248	1.36624	-1.54707	0.000821971	yes	OK
									ZDHHC14	chr6	157802556	158094977	5.80281	1.80064	-1.68824	0.000821971	yes	OK			AGAP3	chr7	150783556	150841525	58.8833	20.0257	-1.556	0.000821971	yes	OK			ARHGAP23	chr17	36584719	36668628	19.9872	6.83957	-1.5471	0.000821971	yes	OK
									GRASP	chr12	52400747	52409724	20.5567	6.36822	-1.69065	0.000821971	yes	OK			PLCB2	chr15	40580078	40600174	5.00953	1.70169	-1.55771	0.000821971	yes	OK			CCDC23	chr1	43272292	43311611	64.9971	22.2367	-1.54743	0.000821971	yes	OK
									MRVI1	chr11	10562782	10715535	2.89653	0.895461	-1.69362	0.000821971	yes	OK			ALDH6A1	chr14	74486058	74551196	20.2678	6.88327	-1.55803	0.000821971	yes	OK			PLD6	chr17	17104242	17109646	10.6093	3.62881	-1.54776	0.000821971	yes	OK
									KCNQ2	chr20	62037541	62103993	147.344	45.511	-1.6949	0.000821971	yes	OK			RASL10B	chr17	34058678	34070540	16.1872	5.49419	-1.55887	0.000821971	yes	OK			FLJ90757	chr17	79002932	79008519	3.82859	1.30662	-1.55098	0.000821971	yes	OK
									LTBP4	chr19	41099071	41144931	50.4157	15.5228	-1.69949	0.000821971	yes	OK			FLJ90757	chr17	79002932	79008519	3.82859	1.29929	-1.55909	0.000821971	yes	OK			DOPEY2	chr21	37536838	37666572	1.71132	0.583608	-1.55204	0.000821971	yes	OK
									RRAS	chr19	50138545	50143400	59.6078	18.3377	-1.70069	0.000821971	yes	OK			ARHGEF10L	chr1	17866264	18024370	11.3141	3.82759	-1.56361	0.000821971	yes	OK			RPS6KA3	chrX	20168028	20285075	3.6614	1.24809	-1.55267	0.000821971	yes	OK
									USP30	chr12	109489845	109525831	6.29166	1.92383	-1.70946	0.000821971	yes	OK			DAZAP2	chr12	51632507	51665239	72.4734	24.4711	-1.56637	0.000821971	yes	OK			LOC339535	chr1	238643683	238649317	7.14247	2.43082	-1.55498	0.000821971	yes	OK
									COL6A1	chr21	47401662	47425034	101.3	30.9721	-1.70959	0.000821971	yes	OK			FAM127C	chrX	134153224	134156652	22.9771	7.75679	-1.56666	0.000821971	yes	OK			KCTD17	chr22	37447778	37459432	30.091	10.2364	-1.55562	0.000821971	yes	OK
									RBM46	chr4	155702422	155749969	6.32705	1.93414	-1.70984	0.000821971	yes	OK			MARCKS	chr6	114178526	114184811	56.6474	19.0691	-1.57077	0.000821971	yes	OK			PREX2	chr8	68864089	69147285	4.22222	1.43584	-1.5561	0.000821971	yes	OK
									CDH2	chr18	25521085	25758017	88.2013	26.8879	-1.71384	0.000821971	yes	OK			LZTS2	chr10	102756863	102790914	59.4881	20.0199	-1.57117	0.000821971	yes	OK			TUSC3	chr8	15396987	15624974	84.2655	28.6519	-1.55631	0.000821971	yes	OK
									PHYH	chr10	13319594	13342130	24.8293	7.55319	-1.71689	0.000821971	yes	OK			DMXL2	chr15	51739920	51914967	7.25973	2.44294	-1.5713	0.000821971	yes	OK			GAL3ST3	chr11	65808235	65816651	8.77725	2.98429	-1.55638	0.000821971	yes	OK
									LOC100505783	chr20	42839599	42854667	8.52391	2.58826	-1.71953	0.000821971	yes	OK			MMP2	chr16	55513080	55540586	43.7427	14.7177	-1.57149	0.000821971	yes	OK			KIAA0101	chr15	64656409	64673702	48.2633	16.4027	-1.557	0.000821971	yes	OK
									LOC645212	chr15	44826702	44829121	7.17667	2.1783	-1.72011	0.000821971	yes	OK			HIPK2	chr7	139246315	139477693	2.05389	0.689434	-1.57488	0.000821971	yes	OK			CBLB	chr3	105376979	105587887	7.14154	2.4267	-1.55724	0.000821971	yes	OK
									ALCAM	chr3	105085556	105295757	4.06321	1.23241	-1.72114	0.000821971	yes	OK			CAMK2D	chr4	114372187	114683083	6.53035	2.18509	-1.57947	0.000821971	yes	OK			FZD1	chr7	90893782	90898132	4.54172	1.54213	-1.55832	0.000821971	yes	OK
									SARDH	chr9	136528659	136605077	7.02843	2.13137	-1.72142	0.000821971	yes	OK			CLCN4	chrX	10124984	10205699	2.22239	0.743465	-1.57978	0.000821971	yes	OK			CD248	chr11	66081957	66084515	19.2958	6.54866	-1.55901	0.000821971	yes	OK
									C3orf33	chr3	155480400	155524072	6.99321	2.12013	-1.72181	0.000821971	yes	OK			SLC35D2	chr9	99082966	99145992	16.5547	5.53167	-1.58146	0.000821971	yes	OK			EZH1	chr17	40852247	40897071	5.29759	1.7977	-1.55918	0.000821971	yes	OK
									FZD7	chr2	202899309	202903160	72.1738	21.8553	-1.72349	0.000821971	yes	OK			LOC440173	chr9	89623365	89657041	9.13453	3.05025	-1.5824	0.000821971	yes	OK			RAB6B	chr3	133543079	133614691	2.06849	0.697094	-1.56915	0.000821971	yes	OK
									NRP2	chr2	206547223	206662857	3.20922	0.971766	-1.72354	0.000821971	yes	OK			CERS1	chr19	18979360	19006953	22.9923	7.66909	-1.58403	0.000821971	yes	OK			PRICKLE1	chr12	42852024	42983572	4.07645	1.37308	-1.56989	0.000821971	yes	OK
									BBS5,KBTBD10	chr2	170336005	170382772	2.22812	0.672253	-1.72875	0.000821971	yes	OK			IFIT5	chr10	91172424	91180759	3.98766	1.329	-1.5852	0.000821971	yes	OK			PARVA	chr11	12399025	12556903	3.00388	1.01044	-1.57185	0.000821971	yes	OK
									UBE2J1	chr6	90035447	90062844	13.5122	4.07332	-1.72998	0.000821971	yes	OK			GPR143	chrX	9693444	9734005	11.3629	3.77482	-1.58985	0.000821971	yes	OK			DYNC2LI1	chr2	44001177	44039449	17.5411	5.8912	-1.5741	0.000821971	yes	OK
									EPHX2	chr8	27348518	27402466	21.338	6.42455	-1.73176	0.000821971	yes	OK			NELL2	chr12	44902057	45307711	36.4618	12.0905	-1.59251	0.000821971	yes	OK			KCTD18	chr2	201353679	201374792	5.2007	1.74211	-1.57787	0.000821971	yes	OK
									NES	chr1	156638552	156647189	145.457	43.7907	-1.7319	0.000821971	yes	OK			TMEM121	chr14	105992952	105996539	15.2695	5.04076	-1.59894	0.000821971	yes	OK			UBL3	chr13	30338544	30424820	7.73918	2.5882	-1.58023	0.000821971	yes	OK
									HSF2BP	chr21	44949002	45079374	2.93764	0.882157	-1.73555	0.000821971	yes	OK			CPNE2	chr16	57126454	57182214	35.2008	11.602	-1.60124	0.000821971	yes	OK			ADAM33	chr20	3648607	3662738	5.4272	1.81204	-1.5826	0.000821971	yes	OK
									CYP4V2	chr4	187112673	187134617	7.66636	2.30042	-1.73664	0.000821971	yes	OK			CXorf57	chrX	105855159	105922673	7.25867	2.39046	-1.60242	0.000821971	yes	OK			HS6ST2	chrX	131760037	132095423	5.13501	1.71267	-1.58412	0.000821971	yes	OK
									POU3F1	chr1	38509522	38512450	9.68202	2.90043	-1.73904	0.000821971	yes	OK			PRELID2	chr5	145138581	145214899	7.13902	2.3464	-1.60528	0.000821971	yes	OK			KIF21A	chr12	39687028	39837233	6.77121	2.25495	-1.58632	0.000821971	yes	OK
									C1orf198	chr1	230972863	231010697	44.4511	13.2567	-1.74549	0.000821971	yes	OK			GPC1	chr2	241374826	241407518	76.4779	25.1315	-1.60555	0.000821971	yes	OK			DDHD2	chr8	38089008	38120320	17.1156	5.6977	-1.58686	0.000821971	yes	OK
									KDM5B-AS1	chr1	202780073	202797923	21.6973	6.46881	-1.74594	0.000821971	yes	OK			FZD9	chr7	72848108	72850450	21.5038	7.05739	-1.60738	0.000821971	yes	OK			PACS1	chr11	65837485	66012312	11.7396	3.88949	-1.59373	0.000821971	yes	OK
									C1QTNF4	chr11	47611215	47615961	12.9838	3.8574	-1.75101	0.000821971	yes	OK			YAP1	chr11	101980524	102104240	10.9802	3.58687	-1.6141	0.000821971	yes	OK			NFATC4	chr14	24836144	24848810	8.90041	2.9483	-1.59399	0.000821971	yes	OK
									KHDRBS2	chr6	62389864	62996122	2.78823	0.82791	-1.7518	0.000821971	yes	OK			MSI1	chr12	120779087	120806958	12.5999	4.11299	-1.61515	0.000821971	yes	OK			DNMBP	chr10	101635332	101769676	10.7794	3.56714	-1.59544	0.000821971	yes	OK
									PRKACB	chr1	84543744	84704181	10.7953	3.20336	-1.75274	0.000821971	yes	OK			ARMCX3	chrX	100878119	100882831	16.263	5.28587	-1.62138	0.000821971	yes	OK			CTBS	chr1	85018803	85040163	2.251	0.742993	-1.59915	0.000821971	yes	OK
									FZD9	chr7	72848108	72850450	21.5038	6.37872	-1.75325	0.000821971	yes	OK			TMSB15A	chrX	101768609	101771699	178.585	58.0197	-1.622	0.000821971	yes	OK			SCCPDH	chr1	246887377	246931440	53.4694	17.6481	-1.5992	0.000821971	yes	OK
									BCAT2	chr19	49298316	49314657	83.8017	24.8391	-1.75437	0.000821971	yes	OK			TLE4	chr9	82186874	82341730	27.3118	8.86514	-1.62331	0.000821971	yes	OK			IFT81	chr12	110562139	110656600	16.0544	5.2987	-1.59926	0.000821971	yes	OK
									CHST3	chr10	73724119	73773322	1.25895	0.372462	-1.75706	0.000821971	yes	OK			SARDH	chr9	136528659	136605077	7.02843	2.28004	-1.62414	0.000821971	yes	OK			CNTRL	chr9	123837267	123939886	3.79003	1.24912	-1.6013	0.000821971	yes	OK
									PLEKHG3	chr14	65171159	65211220	10.1492	3.00245	-1.75716	0.000821971	yes	OK			ATG16L2	chr11	72525450	72540680	17.8092	5.77728	-1.62416	0.000821971	yes	OK			PEAK1	chr15	77400497	77712446	1.08855	0.357329	-1.60708	0.000821971	yes	OK
									CNKSR3	chr6	154726381	154831753	14.6426	4.32437	-1.75961	0.000821971	yes	OK			CTTNBP2	chr7	117350705	117513561	1.14499	0.371376	-1.62439	0.000821971	yes	OK			MAGEL2	chr15	23888695	23892993	4.04762	1.32858	-1.60718	0.000821971	yes	OK
									ANK2	chr4	113739238	114304897	17.6288	5.19322	-1.76323	0.000821971	yes	OK			SYT11	chr1	155829259	155854990	13.4728	4.36001	-1.62765	0.000821971	yes	OK			ZNF532	chr18	56530060	56653719	10.9712	3.59898	-1.60806	0.000821971	yes	OK
									LFNG,MIR4648	chr7	2552162	2568810	18.1227	5.33845	-1.76331	0.000821971	yes	OK			PKIA	chr8	79428335	79517502	8.40082	2.70658	-1.63406	0.000821971	yes	OK			SPATA7	chr14	88851987	88904804	5.89175	1.93041	-1.60979	0.000821971	yes	OK
									RASL12	chr15	65337707	65360388	4.76753	1.40422	-1.76347	0.000821971	yes	OK			TET3	chr2	74273449	74335302	1.62965	0.52463	-1.63519	0.000821971	yes	OK			PHKB	chr16	47495209	47735434	18.3868	6.01366	-1.61236	0.000821971	yes	OK
									HYMAI,PLAGL1	chr6	144261434	144385735	4.38059	1.28122	-1.77361	0.000821971	yes	OK			CEP112	chr17	63631657	64188212	2.98535	0.960758	-1.63566	0.000821971	yes	OK			FAM188B,INMT,INMT-FAM188B	chr7	30791750	30932002	3.8668	1.26392	-1.61324	0.000821971	yes	OK
									C2orf72	chr2	231902280	231914427	2.06503	0.602667	-1.77673	0.000821971	yes	OK			GABRG2	chr5	161461997	161582545	9.47304	3.04377	-1.63797	0.000821971	yes	OK			MEGF6	chr1	3404505	3528059	8.54597	2.79241	-1.61373	0.000821971	yes	OK
									BNIP3L	chr8	26240145	26270644	37.5281	10.9513	-1.77687	0.000821971	yes	OK			RNF144A	chr2	7052406	7184309	5.63227	1.80887	-1.63862	0.000821971	yes	OK			PKN1	chr19	14544165	14582679	79.2908	25.8883	-1.61486	0.000821971	yes	OK
									HES3	chr1	6304174	6306676	34.5854	10.0402	-1.78437	0.000821971	yes	OK			CTSO	chr4	156845269	156875048	2.74496	0.880461	-1.64045	0.000821971	yes	OK			GPC1	chr2	241374826	241407518	76.4779	24.9636	-1.61522	0.000821971	yes	OK
									HIP1	chr7	75162617	75368283	11.6654	3.38257	-1.78604	0.000821971	yes	OK			PNMAL1	chr19	46969747	46974820	19.6848	6.30465	-1.64259	0.000821971	yes	OK			TMEM231	chr16	75572014	75590170	7.49972	2.4445	-1.6173	0.000821971	yes	OK
									ATP8A1	chr4	42410391	42659122	1.52322	0.44098	-1.78834	0.000821971	yes	OK			DYRK3	chr1	206808880	206823695	11.1258	3.55639	-1.64542	0.000821971	yes	OK			LEPREL1	chr3	189674516	189840226	34.6061	11.276	-1.61777	0.000821971	yes	OK
									USP3	chr15	63796709	63894620	16.7241	4.8321	-1.79121	0.000821971	yes	OK			SCMH1	chr1	41480261	41707815	14.7395	4.71105	-1.64556	0.000821971	yes	OK			FZD3	chr8	28351721	28431789	13.4557	4.37488	-1.62091	0.000821971	yes	OK
									FAM111A	chr11	58910317	58922511	2.0983	0.605518	-1.79298	0.000821971	yes	OK			RTN1	chr14	60062693	60337557	14.9816	4.77913	-1.64837	0.000821971	yes	OK			ANKRD13B	chr17	27920220	27949834	11.4733	3.72236	-1.62399	0.000821971	yes	OK
									NLGN4X	chrX	5808082	6146706	1.88815	0.544394	-1.79425	0.000821971	yes	OK			PLXNA3	chrX	153686622	153701985	6.84348	2.18301	-1.64841	0.000821971	yes	OK			TCF7L1	chr2	85360582	85537511	24.8988	8.06635	-1.62609	0.000821971	yes	OK
									NUDT7	chr16	77756388	77776229	14.7471	4.25185	-1.79427	0.000821971	yes	OK			MGAT5B	chr17	74864797	74946471	3.72181	1.18426	-1.65202	0.000821971	yes	OK			SLAIN1	chr13	78271853	78338480	18.2956	5.92466	-1.6267	0.000821971	yes	OK
									NAB1	chr2	191513669	191557495	4.69018	1.35097	-1.79565	0.000821971	yes	OK			C1orf198	chr1	230972863	231010697	44.4511	14.141	-1.65234	0.000821971	yes	OK			CENPV	chr17	16243315	16256972	256.962	82.8218	-1.63347	0.000821971	yes	OK
									CRELD1	chr3	9975523	9987142	26.2547	7.54759	-1.79849	0.000821971	yes	OK			MACROD1	chr11	63766027	63933620	55.0249	17.4435	-1.6574	0.000821971	yes	OK			ATP6V0E2	chr7	149564782	149577787	51.8929	16.7202	-1.63394	0.000821971	yes	OK
									RABL2A	chr2	114384816	114400975	2.51941	0.721983	-1.80305	0.000821971	yes	OK			ZDBF2	chr2	207139376	207179152	3.42544	1.08575	-1.6576	0.000821971	yes	OK			PHF6	chrX	133507309	133562822	38.2767	12.3284	-1.63448	0.000821971	yes	OK
									SDC3	chr1	31342310	31381480	25.2628	7.23744	-1.80347	0.000821971	yes	OK			ARSA	chr22	51061181	51066601	3.13723	0.994001	-1.65817	0.000821971	yes	OK			GLCCI1	chr7	8008373	8128709	5.88547	1.89509	-1.63489	0.000821971	yes	OK
									CCDC136	chr7	128431463	128462187	6.14481	1.73993	-1.82034	0.000821971	yes	OK			CAST	chr5	95997740	96149848	12.2075	3.85746	-1.66204	0.000821971	yes	OK			WDR60	chr7	158649268	158738883	6.06285	1.94997	-1.63654	0.000821971	yes	OK
									INPP1	chr2	191208195	191236391	6.25854	1.76999	-1.82208	0.000821971	yes	OK			ABCA3	chr16	2325818	2390768	31.6183	9.9536	-1.66747	0.000821971	yes	OK			PODXL	chr7	130794854	131241391	117.128	37.4412	-1.64538	0.000821971	yes	OK
									RAB36	chr22	23487512	23506531	4.0125	1.1343	-1.82269	0.000821971	yes	OK			GLT25D2	chr1	183904962	184006863	4.57178	1.43059	-1.67615	0.000821971	yes	OK			ADAM23	chr2	207308234	207485864	17.2848	5.52353	-1.64585	0.000821971	yes	OK
									DENND1A	chr9	126141085	126692417	12.9276	3.65446	-1.82273	0.000821971	yes	OK			C14orf39	chr14	60902673	60952784	4.49344	1.40042	-1.68196	0.000821971	yes	OK			SLC29A4	chr7	5322560	5343731	28.0315	8.94533	-1.64784	0.000821971	yes	OK
									HPS1,MIR4685	chr10	100175954	100206705	83.553	23.5724	-1.82559	0.000821971	yes	OK			SUFU	chr10	104263718	104393214	11.2423	3.48635	-1.68915	0.000821971	yes	OK			CTSO	chr4	156845269	156875048	2.74496	0.874722	-1.64989	0.000821971	yes	OK
									RTN1	chr14	60062693	60337557	14.9816	4.22281	-1.82691	0.000821971	yes	OK			CCNJL	chr5	159678664	159739624	10.2994	3.19376	-1.68923	0.000821971	yes	OK			HCG11	chr6	26521933	26527612	3.783	1.20424	-1.65141	0.000821971	yes	OK
									SRC	chr20	35973087	36033872	27.0714	7.62176	-1.82857	0.000821971	yes	OK			KRCC1	chr2	88326723	88355248	12.7497	3.94975	-1.69064	0.000821971	yes	OK			DAZAP2	chr12	51632507	51665239	72.4734	22.9914	-1.65636	0.000821971	yes	OK
									CTHRC1	chr8	104383742	104395234	37.3252	10.4946	-1.83051	0.000821971	yes	OK			OSBPL7	chr17	45884732	45899147	3.87105	1.1933	-1.69777	0.000821971	yes	OK			HEG1	chr3	124684533	124774866	3.27433	1.0383	-1.65698	0.000821971	yes	OK
									HLA-A	chr6_mann_hap4	1202631	1206062	5.64012	1.58568	-1.83063	0.000821971	yes	OK			CECR6	chr22	17597188	17602257	1.47405	0.454112	-1.69866	0.000821971	yes	OK			ZNF512	chr2	27805892	27845965	21.1975	6.71809	-1.65777	0.000821971	yes	OK
									COL4A6	chrX	107398836	107682704	2.5599	0.719452	-1.83111	0.000821971	yes	OK			PEAK1	chr15	77400497	77712446	1.08855	0.335323	-1.69878	0.000821971	yes	OK			BTBD9	chr6	38136226	38607924	1.82671	0.578424	-1.65905	0.000821971	yes	OK
									GPR161	chr1	168053996	168106425	9.24858	2.59757	-1.83207	0.000821971	yes	OK			PLD6	chr17	17104242	17109646	10.6093	3.2652	-1.70008	0.000821971	yes	OK			IFIT5	chr10	91172424	91180759	3.98766	1.2604	-1.66166	0.000821971	yes	OK
									FAM214A	chr15	52873517	52970820	1.93878	0.544178	-1.833	0.000821971	yes	OK			GTSF1	chr12	54849735	54867386	24.6899	7.59709	-1.7004	0.000821971	yes	OK			MDK	chr11	46402617	46405556	1867.76	590.232	-1.66195	0.000821971	yes	OK
									TMEM132A	chr11	60691912	60719257	114.221	32.0075	-1.83534	0.000821971	yes	OK			IGFBP2	chr2	217498114	217532457	1180.73	362.603	-1.70322	0.000821971	yes	OK			PDE9A	chr21	44073740	44195686	20.741	6.55329	-1.66219	0.000821971	yes	OK
									CLSTN3	chr12	7282966	7311539	14.1567	3.96691	-1.8354	0.000821971	yes	OK			GPX7	chr1	53068042	53074723	18.7904	5.76136	-1.70552	0.000821971	yes	OK			STK40	chr1	36805224	36863546	38.0883	12.0255	-1.66325	0.000821971	yes	OK
									TRIL	chr7	28992973	28998029	1.36311	0.38195	-1.83544	0.000821971	yes	OK			TRIM45	chr1	117653673	117664411	9.34982	2.85955	-1.70915	0.000821971	yes	OK			MBLAC2	chr5	89754019	89770585	3.88205	1.22517	-1.66384	0.000821971	yes	OK
									B2M	chr15	45003684	45010357	656.75	183.748	-1.83761	0.000821971	yes	OK			MBLAC2	chr5	89754019	89770585	3.88205	1.18353	-1.71373	0.000821971	yes	OK			BVES	chr6	105544698	105585049	1.88483	0.594734	-1.66412	0.000821971	yes	OK
									GATM	chr15	45653319	45672321	22.4219	6.27055	-1.83824	0.000821971	yes	OK			SLC30A8	chr8	117962511	118188953	3.51531	1.06959	-1.7166	0.000821971	yes	OK			HDAC6	chrX	48660247	48683387	45.796	14.4172	-1.66743	0.000821971	yes	OK
									C21orf119	chr21	33765441	33766266	18.4702	5.16008	-1.83973	0.000821971	yes	OK			BCORL1	chrX	129139162	129192058	2.76457	0.840093	-1.71844	0.000821971	yes	OK			CCNI	chr4	77968249	77997471	131.861	41.4861	-1.66832	0.000821971	yes	OK
									MMP11	chr22	24115035	24126503	17.654	4.93105	-1.84003	0.000821971	yes	OK			TSPAN15	chr10	71211225	71267423	38.23	11.613	-1.71896	0.000821971	yes	OK			LRIG1	chr3	66119284	66551463	89.8093	28.2246	-1.66991	0.000821971	yes	OK
									SERPING1	chr11	57365026	57382326	168.078	46.6518	-1.84913	0.000821971	yes	OK			SDC3	chr1	31342310	31381480	25.2628	7.6674	-1.72021	0.000821971	yes	OK			MTHFD2L	chr4	75023805	75168814	6.15492	1.92994	-1.67318	0.000821971	yes	OK
									OCIAD2	chr4	48887395	48908815	43.2364	11.9863	-1.85086	0.000821971	yes	OK			EYA1	chr8	72109667	72274467	0.949656	0.288067	-1.721	0.000821971	yes	OK			DERA	chr12	16064185	16190315	48.9392	15.345	-1.67322	0.000821971	yes	OK
									RND1	chr12	49250915	49259653	19.5921	5.4247	-1.85266	0.000821971	yes	OK			E2F2	chr1	23832919	23857712	2.60462	0.789537	-1.722	0.000821971	yes	OK			TSPAN14	chr10	82214037	82282393	29.5495	9.26301	-1.67358	0.000821971	yes	OK
									TNNT1	chr19	55644086	55660606	147.395	40.7304	-1.85551	0.000821971	yes	OK			LINC00087	chrX	134228413	134232733	6.45569	1.95679	-1.72208	0.000821971	yes	OK			C22orf32	chr22	42475694	42480288	24.1014	7.54301	-1.6759	0.000821971	yes	OK
									ALDH5A1	chr6	24495051	24537435	3.0284	0.836549	-1.85603	0.000821971	yes	OK			TCF7L2	chr10	114710008	114927439	21.5017	6.51485	-1.72265	0.000821971	yes	OK			CXCL5	chr4	74861358	74864416	3.25563	1.01865	-1.67627	0.000821971	yes	OK
									LEPREL2	chr12	6937571	6949047	43.9544	12.1316	-1.85724	0.000821971	yes	OK			NKAIN1	chr1	31652133	31712779	24.559	7.43962	-1.72295	0.000821971	yes	OK			TCEAL2	chrX	101380659	101382684	10.8892	3.39923	-1.67961	0.000821971	yes	OK
									CUEDC1	chr17	55938946	55980750	10.7714	2.97163	-1.85789	0.000821971	yes	OK			FBXL19,ORAI3,SETD1A	chr16	30935426	30996024	28.8386	8.73124	-1.72374	0.000821971	yes	OK			CTHRC1	chr8	104383742	104395234	37.3252	11.65	-1.67983	0.000821971	yes	OK
									ARHGAP28	chr18	6729713	6915712	4.34853	1.19914	-1.85853	0.000821971	yes	OK			SCRN2	chr17	45908992	45918699	47.599	14.3016	-1.73476	0.000821971	yes	OK			RAB36	chr22	23487512	23506531	4.0125	1.25225	-1.67998	0.000821971	yes	OK
									TMEM17	chr2	62727355	62733604	2.97522	0.820052	-1.85921	0.000821971	yes	OK			PLEKHG3	chr14	65171159	65211220	10.1492	3.04723	-1.7358	0.000821971	yes	OK			NAP1L5	chr4	89513646	89629686	14.0204	4.37367	-1.68061	0.000821971	yes	OK
									EPHB3	chr3	184279586	184300196	8.56936	2.36116	-1.85969	0.000821971	yes	OK			RGMA	chr15	93586569	93632443	24.4901	7.33784	-1.73877	0.000821971	yes	OK			ZDBF2	chr2	207139376	207179152	3.42544	1.06418	-1.68654	0.000821971	yes	OK
									DMD	chrX	31137338	33357726	25.1758	6.93473	-1.86013	0.000821971	yes	OK			TMEM45A	chr3	100211462	100296289	6.75373	2.02274	-1.73937	0.000821971	yes	OK			GPM6B	chrX	13788901	13956962	52.5775	16.3272	-1.68717	0.000821971	yes	OK
									GRIP1	chr12	66741117	67072925	4.01437	1.10387	-1.86261	0.000821971	yes	OK			LRRN1	chr3	3841090	3890383	107.308	32.1375	-1.73943	0.000821971	yes	OK			THBS3	chr1	155164860	155177772	27.2867	8.46245	-1.68905	0.000821971	yes	OK
									GNG2	chr14	52327021	52436518	19.5099	5.36365	-1.86292	0.000821971	yes	OK			USP3	chr15	63796709	63894620	16.7241	4.99176	-1.74431	0.000821971	yes	OK			USP11	chrX	47092313	47107728	109.183	33.7017	-1.69586	0.000821971	yes	OK
									LIPG	chr18	47088426	47119278	6.5929	1.80878	-1.8659	0.000821971	yes	OK			RFX3	chr9	3223224	3525983	3.09921	0.923554	-1.74663	0.000821971	yes	OK			GABRG2	chr5	161461997	161582545	9.47304	2.92271	-1.69652	0.000821971	yes	OK
									ACBD7	chr10	15117473	15130775	2.23006	0.611256	-1.86724	0.000821971	yes	OK			DPYSL4	chr10	134000413	134019280	3.79095	1.12897	-1.74755	0.000821971	yes	OK			ABAT	chr16	8768443	8878432	3.85975	1.18983	-1.69775	0.000821971	yes	OK
									TMEM155	chr4	122680084	122687963	4.54023	1.23294	-1.88067	0.000821971	yes	OK			DENND1A	chr9	126141085	126692417	12.9276	3.84941	-1.74775	0.000821971	yes	OK			EPHB2	chr1	23037330	23241823	16.2746	5.0032	-1.7017	0.000821971	yes	OK
									DYRK1B	chr19	40315989	40324841	18.8713	5.11144	-1.88439	0.000821971	yes	OK			ABCA2	chr9	139901684	139940676	6.64907	1.97464	-1.75157	0.000821971	yes	OK			FIG4	chr6	110012423	110146634	11.4969	3.52814	-1.70426	0.000821971	yes	OK
									GABRG2	chr5	161461997	161582545	9.47304	2.55813	-1.88874	0.000821971	yes	OK			CYB561D1	chr1	110036657	110043063	3.26915	0.970073	-1.75275	0.000821971	yes	OK			LOC400643	chr18	6925472	6929868	3.31604	1.01483	-1.70823	0.000821971	yes	OK
									ZSWIM5	chr1	45482073	45672250	5.79807	1.55894	-1.89501	0.000821971	yes	OK			TSPAN14	chr10	82214037	82282393	29.5495	8.75355	-1.75519	0.000821971	yes	OK			ZFHX3	chr16	72699149	73092534	0.970088	0.296735	-1.70894	0.000821971	yes	OK
									LOC100270804	chr20	18768614	18776709	3.87883	1.04153	-1.89692	0.000821971	yes	OK			SNAP91	chr6	84262604	84419127	1.50293	0.444975	-1.75598	0.000821971	yes	OK			YAP1	chr11	101980524	102104240	10.9802	3.35018	-1.71259	0.000821971	yes	OK
									DNER	chr2	230222344	230579286	2.59299	0.695677	-1.89813	0.000821971	yes	OK			SEC16B	chr1	177897922	177953397	3.56887	1.05616	-1.75663	0.000821971	yes	OK			PODXL2	chr3	127348038	127391652	88.5257	27.0059	-1.71282	0.000821971	yes	OK
									IGSF11	chr3	118619478	118864898	1.48847	0.398252	-1.90208	0.000821971	yes	OK			CCDC136	chr7	128431463	128462187	6.14481	1.81559	-1.75893	0.000821971	yes	OK			NADKD1	chr5	36192693	36242258	10.581	3.22699	-1.71322	0.000821971	yes	OK
									TMEM231	chr16	75572014	75590170	7.49972	2.00528	-1.90303	0.000821971	yes	OK			RAPGEFL1	chr17	38334241	38351906	2.31903	0.680104	-1.76969	0.000821971	yes	OK			PJA1	chrX	68380580	68385365	46.039	14.0219	-1.71518	0.000821971	yes	OK
									TRIM45	chr1	117653673	117664411	9.34982	2.49544	-1.90564	0.000821971	yes	OK			TMEM170B	chr6	11538510	11583757	2.51852	0.736085	-1.77463	0.000821971	yes	OK			HSPG2	chr1	22138757	22263750	4.81391	1.46476	-1.71655	0.000821971	yes	OK
									PLLP	chr16	57289953	57318584	28.2273	7.5295	-1.90646	0.000821971	yes	OK			FAM188B,INMT,INMT-FAM188B	chr7	30791750	30932002	3.8668	1.12914	-1.77591	0.000821971	yes	OK			CKAP4	chr12	106631656	106641713	109.776	33.3271	-1.7198	0.000821971	yes	OK
									S100A16	chr1	153579359	153585514	45.814	12.2085	-1.90791	0.000821971	yes	OK			ALDH5A1	chr6	24495051	24537435	3.0284	0.882921	-1.7782	0.000821971	yes	OK			LRRC61	chr7	149944300	150035247	76.6958	23.239	-1.7226	0.000821971	yes	OK
									CCNJL	chr5	159678664	159739624	10.2994	2.74383	-1.9083	0.000821971	yes	OK			CDH10	chr5	24487208	24645085	2.96228	0.862841	-1.77954	0.000821971	yes	OK			NES	chr1	156638552	156647189	145.457	44.0596	-1.72306	0.000821971	yes	OK
									DYRK3	chr1	206808880	206823695	11.1258	2.96368	-1.90844	0.000821971	yes	OK			POU6F2	chr7	39017608	39505557	7.00896	2.03858	-1.78164	0.000821971	yes	OK			LOC283481	chr13	102373204	103054124	21.2526	6.43499	-1.72363	0.000821971	yes	OK
									LINC00087	chrX	134228413	134232733	6.45569	1.71866	-1.90928	0.000821971	yes	OK			CHGB	chr20	5891973	5906005	10.5026	3.0512	-1.7833	0.000821971	yes	OK			DYRK3	chr1	206808880	206823695	11.1258	3.36292	-1.72611	0.000821971	yes	OK
									ELAVL4	chr1	50513685	50667540	3.59504	0.952253	-1.91659	0.000821971	yes	OK			FAM214A	chr15	52873517	52970820	1.93878	0.562908	-1.78417	0.000821971	yes	OK			BBS1	chr11	66278118	66301175	18.8228	5.67396	-1.73005	0.000821971	yes	OK
									RASSF4	chr10	45455218	45491732	32.8139	8.69173	-1.91659	0.000821971	yes	OK			CST3	chr20	23595967	23618574	647.803	187.716	-1.787	0.000821971	yes	OK			ARRDC4	chr15	98503932	98517068	12.4394	3.74537	-1.73174	0.000821971	yes	OK
									SEMA3B	chr3	50305039	50314848	9.70741	2.56671	-1.91917	0.000821971	yes	OK			EPHB2	chr1	23037330	23241823	16.2746	4.71545	-1.78715	0.000821971	yes	OK			SARDH	chr9	136528659	136605077	7.02843	2.10899	-1.73665	0.000821971	yes	OK
									LHFP	chr13	39917028	40177356	12.263	3.2403	-1.92011	0.000821971	yes	OK			CDC42EP4	chr17	71279586	71308143	35.7448	10.3445	-1.78887	0.000821971	yes	OK			GOLM1	chr9	88555999	88715116	153.878	46.0548	-1.74037	0.000821971	yes	OK
									HES4	chr1	926839	936345	294.093	77.486	-1.92427	0.000821971	yes	OK			HES4	chr1	926839	936345	294.093	85.0764	-1.78944	0.000821971	yes	OK			PCBD1	chr10	72643265	72648541	33.7888	10.1087	-1.74094	0.000821971	yes	OK
									ZNF333	chr19	14800869	14832070	10.4056	2.73484	-1.92783	0.000821971	yes	OK			FAM50B	chr6	3849631	3851551	12.1046	3.49842	-1.79078	0.000821971	yes	OK			PPP2R3A	chr3	135684514	135866752	6.13007	1.83296	-1.74173	0.000821971	yes	OK
									METRN	chr16	765127	769733	183.172	48.0756	-1.92982	0.000821971	yes	OK			RIN1	chr11	66099541	66104000	7.88065	2.27734	-1.79097	0.000821971	yes	OK			B2M	chr15	45003684	45010357	656.75	196.214	-1.74291	0.000821971	yes	OK
									DAGLA	chr11	61447904	61514474	3.99248	1.04751	-1.93032	0.000821971	yes	OK			BTBD3	chr20	11871476	11907245	32.6174	9.39321	-1.79595	0.000821971	yes	OK			TOM1L2	chr17	17746821	17875784	3.91914	1.16874	-1.74558	0.000821971	yes	OK
									GPC2	chr7	99767223	99775007	39.8887	10.4628	-1.93072	0.000821971	yes	OK			DBP	chr19	49133773	49140639	16.1134	4.63524	-1.79754	0.000821971	yes	OK			C17orf28	chr17	72946838	72968900	4.64652	1.3817	-1.74971	0.000821971	yes	OK
									ADRA2B	chr2	96778622	96781888	3.12965	0.819207	-1.9337	0.000821971	yes	OK			AMPH	chr7	38423296	38671167	5.85418	1.68204	-1.79926	0.000821971	yes	OK			GPR153	chr1	6307405	6321170	30.3851	9.01398	-1.75313	0.000821971	yes	OK
									EPHB2	chr1	23037330	23241823	16.2746	4.25408	-1.9357	0.000821971	yes	OK			HHAT	chr1	210501595	210849638	3.62254	1.03739	-1.80405	0.000821971	yes	OK			IL11RA	chr9	34652181	34662689	24.2471	7.1922	-1.75331	0.000821971	yes	OK
									KRCC1	chr2	88326723	88355248	12.7497	3.30942	-1.94582	0.000821971	yes	OK			LGR4	chr11	27387190	27510025	59.688	17.0244	-1.80984	0.000821971	yes	OK			JAK3	chr19	17935592	17958841	3.01361	0.890797	-1.75832	0.000821971	yes	OK
									ZEB2,ZEB2-AS1	chr2	145141941	145278466	7.62382	1.97846	-1.94613	0.000821971	yes	OK			PPP1R3C	chr10	93388196	93392858	1.79975	0.512211	-1.81299	0.000821971	yes	OK			USP30	chr12	109489845	109525831	6.29166	1.85866	-1.75918	0.000821971	yes	OK
									ZNF572	chr8	125985538	125991630	1.21921	0.316266	-1.94673	0.000821971	yes	OK			GPR1	chr2	207040041	207082771	3.08031	0.876634	-1.81303	0.000821971	yes	OK			ID2	chr2	8822109	8824589	59.3182	17.4176	-1.76793	0.000821971	yes	OK
									SCRN2	chr17	45908992	45918699	47.599	12.3425	-1.9473	0.000821971	yes	OK			TTC3	chr21	38445534	38575458	12.3495	3.51419	-1.81319	0.000821971	yes	OK			SVIP	chr11	22841962	22851382	9.5615	2.80741	-1.768	0.000821971	yes	OK
									SLC35D2	chr9	99082966	99145992	16.5547	4.29054	-1.94802	0.000821971	yes	OK			SERPING1	chr11	57365026	57382326	168.078	47.7517	-1.81551	0.000821971	yes	OK			CAMK2D	chr4	114372187	114683083	6.53035	1.91268	-1.77157	0.000821971	yes	OK
									PCDH19	chrX	99546641	99665271	0.804776	0.208532	-1.94832	0.000821971	yes	OK			MAOA	chrX	43515408	43606068	4.27823	1.2133	-1.81808	0.000821971	yes	OK			IFI16,PYHIN1	chr1	158901336	159024946	166.649	48.7259	-1.77405	0.000821971	yes	OK
									CTBS	chr1	85018803	85040163	2.251	0.583145	-1.94864	0.000821971	yes	OK			CAP2	chr6	17393735	17558023	18.3785	5.1996	-1.82155	0.000821971	yes	OK			SEMA4F	chr2	74881392	74909190	5.64834	1.65127	-1.77425	0.000821971	yes	OK
									CRABP2	chr1	156669359	156682111	714.88	185.094	-1.94945	0.000821971	yes	OK			IDUA	chr4	972862	998394	8.92557	2.51258	-1.82878	0.000821971	yes	OK			LDHD	chr16	75145393	75150670	7.30582	2.13326	-1.77599	0.000821971	yes	OK
									CERS1	chr19	18979360	19006953	22.9923	5.94863	-1.95052	0.000821971	yes	OK			SSFA2	chr2	182756471	182795466	3.95336	1.11067	-1.83165	0.000821971	yes	OK			SIAH2	chr3	150458898	150481263	15.909	4.64307	-1.77669	0.000821971	yes	OK
									MAOA	chrX	43515408	43606068	4.27823	1.10527	-1.95261	0.000821971	yes	OK			SYNGR1	chr22	39745953	39781593	26.9715	7.57439	-1.83223	0.000821971	yes	OK			SLC35D2	chr9	99082966	99145992	16.5547	4.82289	-1.77927	0.000821971	yes	OK
									TMEM121	chr14	105992952	105996539	15.2695	3.93508	-1.95619	0.000821971	yes	OK			FAM176B	chr1	36787228	36790506	44.1051	12.368	-1.83433	0.000821971	yes	OK			C2CD2	chr21	43305218	43374068	3.84214	1.11674	-1.78262	0.000821971	yes	OK
									CKAP4	chr12	106631656	106641713	109.776	28.2726	-1.95709	0.000821971	yes	OK			SEC31B	chr10	102246402	102279595	1.86807	0.523294	-1.83585	0.000821971	yes	OK			RGMA	chr15	93586569	93632443	24.4901	7.11754	-1.78275	0.000821971	yes	OK
									IRF2BPL	chr14	77472975	77495238	22.7592	5.84183	-1.96196	0.000821971	yes	OK			DUSP2	chr2	96808907	96811179	8.78402	2.45154	-1.84119	0.000821971	yes	OK			LOC440173	chr9	89623365	89657041	9.13453	2.651	-1.78479	0.000821971	yes	OK
									CRNDE	chr16	54952664	54963079	21.8477	5.6056	-1.96254	0.000821971	yes	OK			WDTC1	chr1	27561006	27635110	4.21492	1.17541	-1.84234	0.000821971	yes	OK			CRTC3	chr15	91073197	91188577	2.16654	0.626305	-1.79045	0.000821971	yes	OK
									TBL1X	chrX	9431334	9687780	9.49363	2.42713	-1.96771	0.000821971	yes	OK			FBXO17	chr19	39432041	39466380	26.47	7.37291	-1.84405	0.000821971	yes	OK			NREP	chr5	110831728	111312628	101.601	29.2818	-1.79484	0.000821971	yes	OK
									TMEM55A	chr8	92006104	92053203	13.0326	3.33113	-1.96804	0.000821971	yes	OK			IL11RA	chr9	34652181	34662689	24.2471	6.75206	-1.84441	0.000821971	yes	OK			LOC100506013	chr4	165798155	165818676	10.6892	3.08058	-1.79487	0.000821971	yes	OK
									C11orf9	chr11	61520120	61555989	7.25416	1.85146	-1.97014	0.000821971	yes	OK			RIMS3	chr1	41086351	41131335	3.26324	0.907984	-1.84556	0.000821971	yes	OK			CACHD1	chr1	64936475	65158741	52.324	15.0763	-1.79519	0.000821971	yes	OK
									NUP210	chr3	13357732	13461809	29.9735	7.63292	-1.97338	0.000821971	yes	OK			FOXP4,MIR4641	chr6	41514163	41570122	11.4032	3.17002	-1.84687	0.000821971	yes	OK			TK2	chr16	66541905	66584315	2.82307	0.807596	-1.80556	0.000821971	yes	OK
									FAM131B	chr7	143050492	143059840	2.70734	0.689311	-1.97365	0.000821971	yes	OK			SLC27A2	chr15	50474392	50528589	2.60739	0.721495	-1.85355	0.000821971	yes	OK			AOC3	chr17	41003200	41024448	1.99321	0.569809	-1.80654	0.000821971	yes	OK
									S1PR2	chr19	10323030	10341948	5.34762	1.36112	-1.9741	0.000821971	yes	OK			C14orf159	chr14	91337166	91691806	27.7706	7.67678	-1.85499	0.000821971	yes	OK			PARP4	chr13	24995067	25086948	12.6326	3.60447	-1.80929	0.000821971	yes	OK
									CD3G	chr11	118215058	118225879	4.14869	1.05388	-1.97695	0.000821971	yes	OK			OAF	chr11	120081746	120100650	19.2697	5.32569	-1.85529	0.000821971	yes	OK			SNX32	chr11	65601409	65621172	11.1345	3.17034	-1.81233	0.000821971	yes	OK
									ARRDC4	chr15	98503932	98517068	12.4394	3.15657	-1.97848	0.000821971	yes	OK			SERPINF1	chr17	1665258	1680922	34.0826	9.40062	-1.85821	0.000821971	yes	OK			DFNA5	chr7	24737973	24797639	5.3397	1.51986	-1.81282	0.000821971	yes	OK
									NFATC4	chr14	24836144	24848810	8.90041	2.25837	-1.97859	0.000821971	yes	OK			ZNF362	chr1	33721951	33766320	16.6752	4.5985	-1.85847	0.000821971	yes	OK			APPL2	chr12	105567074	105630008	15.1954	4.32209	-1.81383	0.000821971	yes	OK
									NYNRIN	chr14	24867991	24888494	10.2401	2.59497	-1.98044	0.000821971	yes	OK			SAMD10	chr20	62605465	62610995	4.17308	1.15007	-1.85939	0.000821971	yes	OK			FAM127C	chrX	134153224	134156652	22.9771	6.53515	-1.8139	0.000821971	yes	OK
									EML1	chr14	100259744	100408395	18.1947	4.60531	-1.98215	0.000821971	yes	OK			RGS3	chr9	116207010	116360018	15.5616	4.28551	-1.86045	0.000821971	yes	OK			SUFU	chr10	104263718	104393214	11.2423	3.18623	-1.81902	0.000821971	yes	OK
									GALNTL1	chr14	69726680	69821190	2.10506	0.532569	-1.98282	0.000821971	yes	OK			ZNF219	chr14	21538368	21572863	51.3746	14.1169	-1.86363	0.000821971	yes	OK			CX3CL1	chr16	57406413	57418956	4.85913	1.37392	-1.8224	0.000821971	yes	OK
									CDH11	chr16	64980624	65155919	2.78545	0.703366	-1.98556	0.000821971	yes	OK			RRAS	chr19	50138545	50143400	59.6078	16.3764	-1.86388	0.000821971	yes	OK			SNCAIP	chr5	121647819	121799794	4.67229	1.31982	-1.82379	0.000821971	yes	OK
									AMPH	chr7	38423296	38671167	5.85418	1.47592	-1.98785	0.000821971	yes	OK			LEPREL4	chr17	39958200	39979469	35.3108	9.68928	-1.86565	0.000821971	yes	OK			C1QTNF6	chr22	37576205	37584330	8.68749	2.45383	-1.8239	0.000821971	yes	OK
									SLC27A2	chr15	50474392	50528589	2.60739	0.65711	-1.9884	0.000821971	yes	OK			FAM171A2	chr17	42430580	42441235	126.196	34.5915	-1.86718	0.000821971	yes	OK			SMAD3	chr15	67358052	67487616	10.8719	3.06454	-1.82686	0.000821971	yes	OK
									OPTN	chr10	13142081	13180301	18.391	4.63161	-1.98941	0.000821971	yes	OK			H6PD	chr1	9294862	9331394	4.0418	1.10726	-1.86801	0.000821971	yes	OK			TNS1	chr2	218664511	218808796	0.856565	0.24094	-1.82989	0.000821971	yes	OK
									GSN	chr9	124030379	124132545	173.865	43.761	-1.99025	0.000821971	yes	OK			CACNG4	chr17	64960979	65029518	3.88239	1.0634	-1.86827	0.000821971	yes	OK			CDH10	chr5	24487208	24645085	2.96228	0.832478	-1.83122	0.000821971	yes	OK
									ARHGAP5-AS1	chr14	32544624	32545905	3.08112	0.772956	-1.995	0.000821971	yes	OK			DYRK1B	chr19	40315989	40324841	18.8713	5.15747	-1.87146	0.000821971	yes	OK			ARMCX3	chrX	100878119	100882831	16.263	4.55627	-1.83567	0.000821971	yes	OK
									STMN2	chr8	80523048	80578495	173.349	43.3677	-1.99898	0.000821971	yes	OK			SLC29A4	chr7	5322560	5343731	28.0315	7.65069	-1.87339	0.000821971	yes	OK			NYNRIN	chr14	24867991	24888494	10.2401	2.86491	-1.83767	0.000821971	yes	OK
									CHGB	chr20	5891973	5906005	10.5026	2.62254	-2.00171	0.000821971	yes	OK			RCAN2	chr6	46188466	46459804	3.607	0.983823	-1.87433	0.000821971	yes	OK			PABPC5	chrX	90689596	90693583	1.4701	0.411287	-1.8377	0.000821971	yes	OK
									ARHGEF17	chr11	73019300	73080425	10.391	2.59378	-2.0022	0.000821971	yes	OK			HIST2H2BE	chr1	149856009	149858232	8.15809	2.22482	-1.87454	0.000821971	yes	OK			DMXL2	chr15	51739920	51914967	7.25973	2.0276	-1.84014	0.000821971	yes	OK
									ZEB1-AS1	chr10	31605456	31608024	2.68781	0.670544	-2.00303	0.000821971	yes	OK			ACBD4	chr17	43209966	43221543	8.67362	2.35868	-1.87865	0.000821971	yes	OK			FAM26E	chr6	116817650	116880031	2.72907	0.762202	-1.84017	0.000821971	yes	OK
									CDK14	chr7	90225674	90839904	4.09097	1.01512	-2.0108	0.000821971	yes	OK			ING4	chr12	6759499	6772308	23.4862	6.35961	-1.8848	0.000821971	yes	OK			NEXN	chr1	78354179	78409578	2.55168	0.711953	-1.8416	0.000821971	yes	OK
									L3MBTL1	chr20	42136319	42179671	10.0168	2.47783	-2.01527	0.000821971	yes	OK			SCUBE1	chr22	43599228	43739394	3.33299	0.901958	-1.88569	0.000821971	yes	OK			PCYT1B	chrX	24576203	24690979	3.24934	0.901545	-1.84967	0.000821971	yes	OK
									MED12	chrX	70338405	70362442	9.67469	2.3906	-2.01684	0.000821971	yes	OK			TCF12	chr15	57210805	57582124	65.6786	17.7408	-1.88835	0.000821971	yes	OK			ALDH6A1	chr14	74486058	74551196	20.2678	5.61579	-1.85163	0.000821971	yes	OK
									MIAT	chr22	27053445	27072456	24.299	6.00331	-2.01707	0.000821971	yes	OK			FAM26E	chr6	116817650	116880031	2.72907	0.736639	-1.88938	0.000821971	yes	OK			FBXL19,ORAI3,SETD1A	chr16	30935426	30996024	28.8386	7.98561	-1.85253	0.000821971	yes	OK
									DGAT2	chr11	75479777	75512581	8.73658	2.1571	-2.01798	0.000821971	yes	OK			DUSP6	chr12	89741836	89746296	41.7242	11.2063	-1.89658	0.000821971	yes	OK			CHGB	chr20	5891973	5906005	10.5026	2.89962	-1.85681	0.000821971	yes	OK
									CAMK2D	chr4	114372187	114683083	6.53035	1.61113	-2.01908	0.000821971	yes	OK			ZNRF2P1	chr7	32767561	32794974	3.99092	1.07147	-1.89713	0.000821971	yes	OK			PRELID2	chr5	145138581	145214899	7.13902	1.96964	-1.8578	0.000821971	yes	OK
									CTNND2	chr5	10971951	11904502	5.75356	1.41857	-2.02002	0.000821971	yes	OK			PCDHB14	chr5	140603077	140605860	4.06581	1.08922	-1.90024	0.000821971	yes	OK			ECEL1	chr2	233344536	233352532	6.84524	1.88274	-1.86226	0.000821971	yes	OK
									NGEF	chr2	233743395	233877951	23.0405	5.67841	-2.02061	0.000821971	yes	OK			CLSTN3	chr12	7282966	7311539	14.1567	3.78417	-1.90344	0.000821971	yes	OK			GLT25D2	chr1	183904962	184006863	4.57178	1.2572	-1.86255	0.000821971	yes	OK
									C3orf70	chr3	184795837	184870802	1.02214	0.251639	-2.02217	0.000821971	yes	OK			COL9A2	chr1	40766162	40782939	14.9089	3.97455	-1.90731	0.000821971	yes	OK			TRERF1	chr6	42192668	42419783	3.11441	0.856366	-1.86266	0.000821971	yes	OK
									PBXIP1	chr1	154916558	154928567	38.2281	9.37386	-2.02792	0.000821971	yes	OK			MFAP2	chr1	17300948	17308081	136.814	36.4368	-1.90874	0.000821971	yes	OK			SDC3	chr1	31342310	31381480	25.2628	6.9353	-1.86499	0.000821971	yes	OK
									SIRPA	chr20	1874812	1920540	2.5704	0.629288	-2.0302	0.000821971	yes	OK			TMEM132A	chr11	60691912	60719257	114.221	30.3664	-1.91128	0.000821971	yes	OK			STRA6	chr15	74471800	74502046	21.8661	5.99746	-1.86627	0.000821971	yes	OK
									C16orf45	chr16	15528324	15682116	24.3206	5.94476	-2.03249	0.000821971	yes	OK			CD40	chr20	44746905	44758454	14.7519	3.90985	-1.91571	0.000821971	yes	OK			ACSS1	chr20	24986865	25038818	7.02171	1.92041	-1.87041	0.000821971	yes	OK
									GBX2	chr2	237073573	237172988	59.6209	14.4983	-2.03994	0.000821971	yes	OK			MORN4	chr10	99374307	99393913	14.6717	3.88259	-1.91795	0.000821971	yes	OK			OSBPL7	chr17	45884732	45899147	3.87105	1.05392	-1.87696	0.000821971	yes	OK
									IGDCC3	chr15	65619462	65670398	144.082	35.0226	-2.04053	0.000821971	yes	OK			BEND5	chr1	48988352	50489626	11.4869	3.03604	-1.91972	0.000821971	yes	OK			CPNE2	chr16	57126454	57182214	35.2008	9.57592	-1.87813	0.000821971	yes	OK
									ITPKB	chr1	226819390	226926876	0.916835	0.22229	-2.04422	0.000821971	yes	OK			ACBD7	chr10	15117473	15130775	2.23006	0.588423	-1.92216	0.000821971	yes	OK			LDOC1L	chr22	44888449	44894005	9.24409	2.51288	-1.87919	0.000821971	yes	OK
									FGGY	chr1	59762624	60228402	3.15633	0.764624	-2.04542	0.000821971	yes	OK			DAGLA	chr11	61447904	61514474	3.99248	1.05311	-1.92263	0.000821971	yes	OK			VAT1L	chr16	77822482	78014001	1.41601	0.384716	-1.87997	0.000821971	yes	OK
									NCAM1	chr11	112831252	113149158	3.05996	0.74124	-2.0455	0.000821971	yes	OK			LEPREL1	chr3	189674516	189840226	34.6061	9.1152	-1.92468	0.000821971	yes	OK			MAOA	chrX	43515408	43606068	4.27823	1.15887	-1.8843	0.000821971	yes	OK
									ETV5	chr3	185764105	185826901	16.1581	3.91278	-2.04599	0.000821971	yes	OK			MIAT	chr22	27053445	27072456	24.299	6.3928	-1.92638	0.000821971	yes	OK			FMOD	chr1	203309751	203320289	2.17739	0.587934	-1.88887	0.000821971	yes	OK
									ECEL1	chr2	233344536	233352532	6.84524	1.65245	-2.0505	0.000821971	yes	OK			CRTC3	chr15	91073197	91188577	2.16654	0.568442	-1.93031	0.000821971	yes	OK			TMEM132A	chr11	60691912	60719257	114.221	30.8153	-1.89011	0.000821971	yes	OK
									EPHA2	chr1	16450830	16482582	27.5512	6.63929	-2.05301	0.000821971	yes	OK			SOX11	chr2	5832798	5848284	2.92068	0.764774	-1.9332	0.000821971	yes	OK			FAM101A,ZNF664,ZNF664-FAM101A	chr12	124457761	124800570	6.9905	1.87624	-1.89755	0.000821971	yes	OK
									BIN1	chr2	127805598	127864914	39.9252	9.60296	-2.05575	0.000821971	yes	OK			HCFC2	chr12	104458235	104500304	0.86276	0.225859	-1.93354	0.000821971	yes	OK			KCNQ2	chr20	62037541	62103993	147.344	39.5071	-1.89901	0.000821971	yes	OK
									NEO1	chr15	73344267	73597547	7.29396	1.75152	-2.05809	0.000821971	yes	OK			CDC42EP5	chr19	54976209	54984422	68.3722	17.8739	-1.93556	0.000821971	yes	OK			COL9A2	chr1	40766162	40782939	14.9089	3.9899	-1.90175	0.000821971	yes	OK
									CELSR2	chr1	109792221	109825790	16.2372	3.89285	-2.0604	0.000821971	yes	OK			ANXA9	chr1	150954498	150968114	3.9499	1.03227	-1.936	0.000821971	yes	OK			FAM131B	chr7	143050492	143059840	2.70734	0.724506	-1.90181	0.000821971	yes	OK
									ARMCX4	chrX	100673250	100790975	2.65882	0.637141	-2.0611	0.000821971	yes	OK			SLC2A10	chr20	45338278	45364985	8.80522	2.2983	-1.9378	0.000821971	yes	OK			SLC30A8	chr8	117962511	118188953	3.51531	0.940515	-1.90213	0.000821971	yes	OK
									RCAN2	chr6	46188466	46459804	3.607	0.863718	-2.06217	0.000821971	yes	OK			FNDC5	chr1	33327868	33338082	2.50218	0.651884	-1.9405	0.000821971	yes	OK			MSI1	chr12	120779087	120806958	12.5999	3.3695	-1.90281	0.000821971	yes	OK
									WSCD1	chr17	5973933	6027747	6.82858	1.63461	-2.06264	0.000821971	yes	OK			SLC27A1	chr19	17581299	17616977	5.84386	1.51848	-1.94429	0.000821971	yes	OK			C1orf21	chr1	184356149	184598155	2.09848	0.560581	-1.90435	0.000821971	yes	OK
									SPRY4	chr5	141689938	141704620	20.926	4.98773	-2.06884	0.000821971	yes	OK			WLS	chr1	68167148	68698284	18.7729	4.87367	-1.94557	0.000821971	yes	OK			S100A6	chr1	153507075	153508717	748.063	199.53	-1.90656	0.000821971	yes	OK
									SLITRK5	chr13	88324869	88331870	7.10105	1.68961	-2.07134	0.000821971	yes	OK			ELAVL4	chr1	50513685	50667540	3.59504	0.931809	-1.9479	0.000821971	yes	OK			DPP10	chr2	115199898	116602326	1.18484	0.315841	-1.90742	0.000821971	yes	OK
									TGM2	chr20	36756863	36793700	4.95602	1.17806	-2.07277	0.000821971	yes	OK			CYBRD1	chr2	172378865	172414643	1.51291	0.391545	-1.95008	0.000821971	yes	OK			DLK1	chr14	101193201	101201529	24.2427	6.45954	-1.90805	0.000821971	yes	OK
									NKAIN4	chr20	61872134	61892967	21.925	5.18688	-2.07964	0.000821971	yes	OK			ANTXR2	chr4	80822770	81018781	9.2856	2.38539	-1.96077	0.000821971	yes	OK			TLE4	chr9	82186874	82341730	27.3118	7.27722	-1.90806	0.000821971	yes	OK
									PEX11G	chr19	7541680	7553905	8.50289	2.0108	-2.08018	0.000821971	yes	OK			LOC100131564	chr1	93770943	93811368	9.88715	2.53758	-1.9621	0.000821971	yes	OK			HIP1	chr7	75162617	75368283	11.6654	3.10485	-1.90964	0.000821971	yes	OK
									HAPLN4	chr19	19366451	19373596	6.24061	1.47191	-2.084	0.000821971	yes	OK			LOC727982	chr2	4675806	4703812	2.10593	0.539819	-1.96391	0.000821971	yes	OK			IGSF11	chr3	118619478	118864898	1.48847	0.396138	-1.90976	0.000821971	yes	OK
									RNF130	chr5	179382242	179499114	194.422	45.7813	-2.08636	0.000821971	yes	OK			GRIP1	chr12	66741117	67072925	4.01437	1.02577	-1.96847	0.000821971	yes	OK			CDC42EP4	chr17	71279586	71308143	35.7448	9.51279	-1.90979	0.000821971	yes	OK
									PLCB2	chr15	40580078	40600174	5.00953	1.17931	-2.08673	0.000821971	yes	OK			C16orf45	chr16	15528324	15682116	24.3206	6.20202	-1.97137	0.000821971	yes	OK			BIN1	chr2	127805598	127864914	39.9252	10.6123	-1.91156	0.000821971	yes	OK
									NRIP1	chr21	16333480	16437314	8.51957	2.00536	-2.08692	0.000821971	yes	OK			USP30	chr12	109489845	109525831	6.29166	1.60369	-1.97204	0.000821971	yes	OK			TTC3	chr21	38445534	38575458	12.3495	3.27553	-1.91466	0.000821971	yes	OK
									ING4	chr12	6759499	6772308	23.4862	5.50989	-2.09171	0.000821971	yes	OK			PARP10	chr8	145051319	145060635	2.25666	0.574697	-1.97332	0.000821971	yes	OK			ZNF423	chr16	49524448	49890055	26.8951	7.0996	-1.92153	0.000821971	yes	OK
									NPTXR	chr22	39214455	39240017	3.13822	0.734196	-2.09571	0.000821971	yes	OK			DNER	chr2	230222344	230579286	2.59299	0.659843	-1.97443	0.000821971	yes	OK			H6PD	chr1	9294862	9331394	4.0418	1.06611	-1.92264	0.000821971	yes	OK
									SDC2	chr8	97505881	97624037	17.8781	4.18059	-2.09641	0.000821971	yes	OK			DENND2A	chr7	140216387	140340571	19.306	4.91028	-1.97517	0.000821971	yes	OK			TMEM106C	chr12	48357329	48362661	58.6553	15.4658	-1.92318	0.000821971	yes	OK
									FIGNL2	chr12	52211624	52242412	3.32219	0.774712	-2.1004	0.000821971	yes	OK			LRRC27	chr10	134145613	134195010	6.24963	1.58458	-1.97967	0.000821971	yes	OK			EPHX2	chr8	27348518	27402466	21.338	5.61905	-1.92503	0.000821971	yes	OK
									HTRA1	chr10	124221040	124274424	4.34408	1.01284	-2.10064	0.000821971	yes	OK			NKAIN4	chr20	61872134	61892967	21.925	5.54353	-1.9837	0.000821971	yes	OK			E2F2	chr1	23832919	23857712	2.60462	0.684877	-1.92716	0.000821971	yes	OK
									EPHB6	chr7	142552791	142568847	4.45029	1.03591	-2.10299	0.000821971	yes	OK			CNKSR3	chr6	154726381	154831753	14.6426	3.6962	-1.98605	0.000821971	yes	OK			LEPREL4	chr17	39958200	39979469	35.3108	9.26407	-1.93039	0.000821971	yes	OK
									CPNE2	chr16	57126454	57182214	35.2008	8.16032	-2.10891	0.000821971	yes	OK			COL4A6	chrX	107398836	107682704	2.5599	0.645719	-1.98711	0.000821971	yes	OK			KLHL13	chrX	117031775	117251303	8.06314	2.10495	-1.93756	0.000821971	yes	OK
									ARHGEF10L	chr1	17866264	18024370	11.3141	2.62003	-2.11046	0.000821971	yes	OK			CRNDE	chr16	54952664	54963079	21.8477	5.49836	-1.99041	0.000821971	yes	OK			ATG16L2	chr11	72525450	72540680	17.8092	4.63759	-1.94118	0.000821971	yes	OK
									LOC729683	chr17	61777697	61780045	4.13955	0.957325	-2.11239	0.000821971	yes	OK			VASH1	chr14	77227856	77249363	15.3952	3.87389	-1.99062	0.000821971	yes	OK			METRN	chr16	765127	769733	183.172	47.6904	-1.94143	0.000821971	yes	OK
									LRRC27	chr10	134145613	134195010	6.24963	1.44115	-2.11655	0.000821971	yes	OK			ABAT	chr16	8768443	8878432	3.85975	0.968729	-1.99434	0.000821971	yes	OK			MACROD1	chr11	63766027	63933620	55.0249	14.3098	-1.94308	0.000821971	yes	OK
									SLC5A12	chr11	26688565	26988963	3.25544	0.749764	-2.11834	0.000821971	yes	OK			C1QTNF6	chr22	37576205	37584330	8.68749	2.17751	-1.99626	0.000821971	yes	OK			ACTC1	chr15	35080296	35087927	6.94118	1.80508	-1.94312	0.000821971	yes	OK
									LINGO1	chr15	77905354	77983244	74.0441	17.0356	-2.11983	0.000821971	yes	OK			ST3GAL3	chr1	44173217	44396860	12.6566	3.16493	-1.99964	0.000821971	yes	OK			AXL	chr19	41725107	41767671	4.45229	1.15556	-1.94596	0.000821971	yes	OK
									ITGA5	chr12	54789043	54813061	23.0903	5.31068	-2.12032	0.000821971	yes	OK			PAM	chr5	102090972	102366808	20.7384	5.18516	-1.99984	0.000821971	yes	OK			PLEKHG3	chr14	65171159	65211220	10.1492	2.62958	-1.94846	0.000821971	yes	OK
									C17orf100	chr17	6555058	6556617	5.33848	1.219	-2.13073	0.000821971	yes	OK			THBS3	chr1	155164860	155177772	27.2867	6.81685	-2.00102	0.000821971	yes	OK			PCDH11X	chrX	91034259	91878228	3.4301	0.886761	-1.95163	0.000821971	yes	OK
									APOL2	chr22	36622254	36636000	5.04933	1.15165	-2.13239	0.000821971	yes	OK			TET2	chr4	106067031	106200960	1.23226	0.307618	-2.00209	0.000821971	yes	OK			RIN1	chr11	66099541	66104000	7.88065	2.03692	-1.95193	0.000821971	yes	OK
									NPR2	chr9	35792314	35812259	3.0285	0.689412	-2.13516	0.000821971	yes	OK			L3MBTL1	chr20	42136319	42179671	10.0168	2.49079	-2.00774	0.000821971	yes	OK			MSRB2	chr10	23384426	23411305	14.3342	3.70043	-1.95369	0.000821971	yes	OK
									ASCL1	chr12	103351451	103354294	1.98246	0.450423	-2.13794	0.000821971	yes	OK			NUDT19	chr19	33182866	33204702	4.5081	1.11916	-2.0101	0.000821971	yes	OK			KLHL3	chr5	136953188	137071779	1.27474	0.328432	-1.95654	0.000821971	yes	OK
									CES3	chr16	66995131	67009052	1.775	0.400837	-2.14674	0.000821971	yes	OK			MFAP5	chr12	8798530	8815433	3.19047	0.791455	-2.01119	0.000821971	yes	OK			FBXO17	chr19	39432041	39466380	26.47	6.7985	-1.96107	0.000821971	yes	OK
									STRA6	chr15	74471800	74502046	21.8661	4.93119	-2.14869	0.000821971	yes	OK			C20orf112	chr20	31030861	31172875	14.7353	3.64493	-2.01531	0.000821971	yes	OK			IL21R	chr16	27413482	27464714	3.7218	0.949759	-1.97037	0.000821971	yes	OK
									HHAT	chr1	210501595	210849638	3.62254	0.807504	-2.16546	0.000821971	yes	OK			SNX32	chr11	65601409	65621172	11.1345	2.74844	-2.01835	0.000821971	yes	OK			SCMH1	chr1	41480261	41707815	14.7395	3.74762	-1.97564	0.000821971	yes	OK
									ST3GAL3	chr1	44173217	44396860	12.6566	2.81855	-2.16686	0.000821971	yes	OK			ACTN3	chr11	66314390	66330806	37.989	9.36725	-2.01988	0.000821971	yes	OK			USP3	chr15	63796709	63894620	16.7241	4.25137	-1.97593	0.000821971	yes	OK
									PRKCE	chr2	45879042	46415129	1.14901	0.255609	-2.16838	0.000821971	yes	OK			ARMCX4	chrX	100673250	100790975	2.65882	0.652977	-2.02568	0.000821971	yes	OK			TET2	chr4	106067031	106200960	1.23226	0.312945	-1.97732	0.000821971	yes	OK
									CSPG4	chr15	75966662	76005189	3.69282	0.819345	-2.17218	0.000821971	yes	OK			HYMAI,PLAGL1	chr6	144261434	144385735	4.38059	1.07412	-2.02798	0.000821971	yes	OK			NUDT19	chr19	33182866	33204702	4.5081	1.14475	-1.97749	0.000821971	yes	OK
									PTPRM	chr18	7567313	8410777	4.5022	0.998796	-2.17237	0.000821971	yes	OK			MED12	chrX	70338405	70362442	9.67469	2.36711	-2.03109	0.000821971	yes	OK			TCF7L2	chr10	114710008	114927439	21.5017	5.45373	-1.97914	0.000821971	yes	OK
									GARNL3	chr9	130026755	130155928	1.82181	0.404154	-2.1724	0.000821971	yes	OK			GSTM3	chr1	110276553	110283660	9.99606	2.44051	-2.03418	0.000821971	yes	OK			SCRN2	chr17	45908992	45918699	47.599	12.0673	-1.97982	0.000821971	yes	OK
									SERPINF1	chr17	1665258	1680922	34.0826	7.56027	-2.17252	0.000821971	yes	OK			GNAZ	chr22	23401592	23484241	8.16518	1.99246	-2.03493	0.000821971	yes	OK			HOXB2	chr17	46619903	46651810	60.3035	15.2825	-1.98037	0.000821971	yes	OK
									LOC440173	chr9	89623365	89657041	9.13453	2.01687	-2.17921	0.000821971	yes	OK			DPP10	chr2	115199898	116602326	1.18484	0.289107	-2.03502	0.000821971	yes	OK			TAC3	chr12	57403780	57410344	67.1092	16.9822	-1.98249	0.000821971	yes	OK
									MYL9	chr20	35169886	35189589	99.0429	21.8191	-2.18246	0.000821971	yes	OK			TNS1	chr2	218664511	218808796	0.856565	0.208792	-2.0365	0.000821971	yes	OK			AIG1	chr6	143381846	143661527	16.2476	4.10946	-1.9832	0.000821971	yes	OK
									MIR564,TMEM42	chr3	44903379	44907157	41.8363	9.20535	-2.18421	0.000821971	yes	OK			ADAMTS7	chr15	79051541	79103794	15.201	3.7038	-2.03708	0.000821971	yes	OK			SMO	chr7	128828447	128853482	13.0329	3.28298	-1.98908	0.000821971	yes	OK
									IGFBP2	chr2	217498114	217532457	1180.73	259.585	-2.1854	0.000821971	yes	OK			TNFRSF19	chr13	24144508	24250244	2.74121	0.666868	-2.03934	0.000821971	yes	OK			EXD3	chr9	140201347	140317714	9.78946	2.44675	-2.00036	0.000821971	yes	OK
									KIAA1407	chr3	113682983	113775460	1.06452	0.233623	-2.18795	0.000821971	yes	OK			C5orf4	chr5	154198051	154230213	3.56162	0.864505	-2.04259	0.000821971	yes	OK			FLJ39080	chr8	75512100	75688184	1.56576	0.390873	-2.00209	0.000821971	yes	OK
									TGFB1	chr19	41836811	41859831	21.4752	4.70287	-2.19106	0.000821971	yes	OK			NYNRIN	chr14	24867991	24888494	10.2401	2.48413	-2.04342	0.000821971	yes	OK			KRCC1	chr2	88326723	88355248	12.7497	3.17658	-2.00492	0.000821971	yes	OK
									TMEM45A	chr3	100211462	100296289	6.75373	1.47679	-2.19322	0.000821971	yes	OK			COL5A2	chr2	189896640	190044605	7.98509	1.93259	-2.04677	0.000821971	yes	OK			PPAPDC3	chr9	134165080	134184649	7.66612	1.90578	-2.00811	0.000821971	yes	OK
									KIAA1045	chr9	34958191	34982541	0.85842	0.187632	-2.19378	0.000821971	yes	OK			MN1	chr22	28140997	28197486	4.54011	1.09626	-2.05014	0.000821971	yes	OK			TNFAIP3	chr6	138188580	138204452	10.1253	2.50754	-2.01362	0.000821971	yes	OK
									MEGF6	chr1	3404505	3528059	8.54597	1.86507	-2.19602	0.000821971	yes	OK			CAHM	chr6	163834096	163834982	11.4063	2.73628	-2.05954	0.000821971	yes	OK			ZDHHC14	chr6	157802556	158094977	5.80281	1.43043	-2.02031	0.000821971	yes	OK
									FEZ1	chr11	125307120	125366206	81.787	17.8375	-2.19695	0.000821971	yes	OK			AXL	chr19	41725107	41767671	4.45229	1.06566	-2.0628	0.000821971	yes	OK			RAPGEFL1	chr17	38334241	38351906	2.31903	0.571324	-2.02114	0.000821971	yes	OK
									BCL6B	chr17	6926368	6932961	3.44832	0.746293	-2.20808	0.000821971	yes	OK			MXRA7	chr17	74671808	74707056	21.0674	5.01978	-2.06932	0.000821971	yes	OK			CNKSR3	chr6	154726381	154831753	14.6426	3.60347	-2.02271	0.000821971	yes	OK
									NRXN2	chr11	64373645	64490660	1.38551	0.298513	-2.21455	0.000821971	yes	OK			UBE2L6	chr11	57319127	57335803	97.4945	23.142	-2.07481	0.000821971	yes	OK			PI15	chr8	75706303	75767264	4.52536	1.11283	-2.02379	0.000821971	yes	OK
									PAM	chr5	102090972	102366808	20.7384	4.46032	-2.21708	0.000821971	yes	OK			OPTN	chr10	13142081	13180301	18.391	4.36495	-2.07496	0.000821971	yes	OK			FGF13	chrX	137713733	138287185	74.5249	18.3251	-2.0239	0.000821971	yes	OK
									HS6ST2	chrX	131760037	132095423	5.13501	1.09935	-2.22372	0.000821971	yes	OK			KCNE1L	chrX	108866928	108868393	6.06559	1.43896	-2.07562	0.000821971	yes	OK			DENND1A	chr9	126141085	126692417	12.9276	3.16709	-2.02923	0.000821971	yes	OK
									RNF165	chr18	43914186	44040783	2.63957	0.564768	-2.22458	0.000821971	yes	OK			STC1	chr8	23699433	23712320	1.70335	0.402647	-2.08079	0.000821971	yes	OK			TCF12	chr15	57210805	57582124	65.6786	16.0636	-2.03163	0.000821971	yes	OK
									CAP2	chr6	17393735	17558023	18.3785	3.9282	-2.22608	0.000821971	yes	OK			GARNL3	chr9	130026755	130155928	1.82181	0.430331	-2.08186	0.000821971	yes	OK			RGS3	chr9	116207010	116360018	15.5616	3.80529	-2.03191	0.000821971	yes	OK
									CCDC159	chr19	11457180	11465620	5.86115	1.25102	-2.22808	0.000821971	yes	OK			MST1R	chr3	49924435	49941306	3.66445	0.863119	-2.08596	0.000821971	yes	OK			RASL10B	chr17	34058678	34070540	16.1872	3.95654	-2.03254	0.000821971	yes	OK
									OSBPL7	chr17	45884732	45899147	3.87105	0.822207	-2.23515	0.000821971	yes	OK			FIGN	chr2	164463699	164592513	2.6473	0.621206	-2.09138	0.000821971	yes	OK			C1orf198	chr1	230972863	231010697	44.4511	10.8428	-2.03548	0.000821971	yes	OK
									CERCAM	chr9	131181826	131201758	76.2886	16.1795	-2.2373	0.000821971	yes	OK			ENPEP	chr4	111397228	111484493	1.7336	0.405244	-2.09691	0.000821971	yes	OK			RCBTB2	chr13	49063098	49107316	7.6213	1.85343	-2.03984	0.000821971	yes	OK
									GLB1L2	chr11	134201767	134246218	5.44763	1.15269	-2.24063	0.000821971	yes	OK			LOC100506013	chr4	165798155	165818676	10.6892	2.4878	-2.10321	0.000821971	yes	OK			CACNG4	chr17	64960979	65029518	3.88239	0.942927	-2.04173	0.000821971	yes	OK
									HOMEZ	chr14	23742843	23755309	11.7125	2.47091	-2.24494	0.000821971	yes	OK			TMEM55A	chr8	92006104	92053203	13.0326	3.0087	-2.11491	0.000821971	yes	OK			FAM176B	chr1	36787228	36790506	44.1051	10.7017	-2.0431	0.000821971	yes	OK
									SLC1A6	chr19	15060848	15090626	18.0394	3.80392	-2.2456	0.000821971	yes	OK			ATP8A1	chr4	42410391	42659122	1.52322	0.351641	-2.11495	0.000821971	yes	OK			SPTBN2	chr11	66448779	66495648	5.84589	1.41751	-2.04407	0.000821971	yes	OK
									TK2	chr16	66541905	66584315	2.82307	0.594424	-2.2477	0.000821971	yes	OK			TMEM8B	chr9	35829221	35855330	11.4201	2.63395	-2.11627	0.000821971	yes	OK			SLC27A1	chr19	17581299	17616977	5.84386	1.41602	-2.04508	0.000821971	yes	OK
									VSTM2B	chr19	30017490	30055460	4.7726	1.00283	-2.2507	0.000821971	yes	OK			ID2	chr2	8822109	8824589	59.3182	13.6494	-2.11964	0.000821971	yes	OK			MAP3K8	chr10	30722726	30750764	6.73482	1.63112	-2.04578	0.000821971	yes	OK
									H6PD	chr1	9294862	9331394	4.0418	0.846758	-2.25498	0.000821971	yes	OK			ESRRG	chr1	216676587	217311097	2.95718	0.680146	-2.12031	0.000821971	yes	OK			GPC2	chr7	99767223	99775007	39.8887	9.61536	-2.05257	0.000821971	yes	OK
									COL7A1,MIR711	chr3	48601451	48632669	8.9859	1.88181	-2.25554	0.000821971	yes	OK			TNFAIP3	chr6	138188580	138204452	10.1253	2.32582	-2.12216	0.000821971	yes	OK			FAM171A2	chr17	42430580	42441235	126.196	30.3585	-2.05549	0.000821971	yes	OK
									ACBD4	chr17	43209966	43221543	8.67362	1.80277	-2.26642	0.000821971	yes	OK			FAM47E,FAM47E-STBD1,STBD1	chr4	77135192	77232315	9.54361	2.18624	-2.12608	0.000821971	yes	OK			NOS3	chr7	150688143	150721586	31.1136	7.46483	-2.05936	0.000821971	yes	OK
									TCL6	chr14	96086875	96139789	7.63546	1.57914	-2.27357	0.000821971	yes	OK			SEMA6D	chr15	47476402	48066420	0.997448	0.22848	-2.12617	0.000821971	yes	OK			LOC100506844	chr12	58307983	58329947	18.7225	4.47847	-2.0637	0.000821971	yes	OK
									EFNA5	chr5	106712589	107006596	5.10262	1.05371	-2.27577	0.000821971	yes	OK			LTBP2	chr14	74964885	75079034	1.58	0.359673	-2.13517	0.000821971	yes	OK			LGR4	chr11	27387190	27510025	59.688	14.2768	-2.06377	0.000821971	yes	OK
									DTX1	chr12	113495661	113535833	2.9744	0.613408	-2.27768	0.000821971	yes	OK			XKR5	chr8	6666040	6699975	1.72678	0.391488	-2.14104	0.000821971	yes	OK			PHTF1	chr1	114239823	114302155	30.5835	7.3094	-2.06493	0.000821971	yes	OK
									CDC42EP5	chr19	54976209	54984422	68.3722	14.0905	-2.27868	0.000821971	yes	OK			UBE2J1	chr6	90035447	90062844	13.5122	3.0566	-2.14426	0.000821971	yes	OK			RNF144A	chr2	7052406	7184309	5.63227	1.34516	-2.06593	0.000821971	yes	OK
									EMP1	chr12	13349601	13369708	4.53692	0.931698	-2.28378	0.000821971	yes	OK			S100A6	chr1	153507075	153508717	748.063	168.949	-2.14657	0.000821971	yes	OK			DUSP6	chr12	89741836	89746296	41.7242	9.94078	-2.06945	0.000821971	yes	OK
									SERP2	chr13	44947977	44971850	13.2221	2.71066	-2.28623	0.000821971	yes	OK			PRAF2	chrX	48928817	48931662	85.9022	19.4006	-2.14659	0.000821971	yes	OK			FAM115A	chr7	143548460	143599278	3.19543	0.76114	-2.06978	0.000821971	yes	OK
									EMP3	chr19	48828628	48867376	107.918	22.0866	-2.28869	0.000821971	yes	OK			CES3	chr16	66995131	67009052	1.775	0.399451	-2.15173	0.000821971	yes	OK			GARNL3	chr9	130026755	130155928	1.82181	0.433681	-2.07067	0.000821971	yes	OK
									OAF	chr11	120081746	120100650	19.2697	3.94374	-2.2887	0.000821971	yes	OK			PIK3R3	chr1	46505811	46598708	19.3711	4.3449	-2.15651	0.000821971	yes	OK			FOXP4,MIR4641	chr6	41514163	41570122	11.4032	2.71214	-2.07193	0.000821971	yes	OK
									FNDC5	chr1	33327868	33338082	2.50218	0.51181	-2.2895	0.000821971	yes	OK			NOVA1	chr14	26915088	27066960	4.57461	1.0219	-2.16239	0.000821971	yes	OK			OLFML2B	chr1	161952930	161993644	8.92847	2.12145	-2.07336	0.000821971	yes	OK
									EPHB1	chr3	134514098	134979307	8.04145	1.64361	-2.29059	0.000821971	yes	OK			TBL1X	chrX	9431334	9687780	9.49363	2.11994	-2.16293	0.000821971	yes	OK			ABCA3	chr16	2325818	2390768	31.6183	7.49776	-2.07623	0.000821971	yes	OK
									H2AFY2	chr10	71812356	71892690	60.6669	12.395	-2.29115	0.000821971	yes	OK			GLB1L2	chr11	134201767	134246218	5.44763	1.21586	-2.16365	0.000821971	yes	OK			2004-09-01	chr17	56597610	56618179	4.35998	1.03381	-2.07635	0.000821971	yes	OK
									TGFBI	chr5	135364583	135399507	4.31942	0.880198	-2.29494	0.000821971	yes	OK			CD248	chr11	66081957	66084515	19.2958	4.29407	-2.16787	0.000821971	yes	OK			CLCN4	chrX	10124984	10205699	2.22239	0.52691	-2.07649	0.000821971	yes	OK
									FXYD2,FXYD6,FXYD6-FXYD2	chr11	117690789	117748201	59.2524	12.0655	-2.29598	0.000821971	yes	OK			AGPAT3	chr21	45285115	45407475	4.12296	0.915854	-2.17049	0.000821971	yes	OK			HHAT	chr1	210501595	210849638	3.62254	0.855675	-2.08187	0.000821971	yes	OK
									SAMD10	chr20	62605465	62610995	4.17308	0.848373	-2.29834	0.000821971	yes	OK			ZNF853	chr7	6655245	6663921	6.72597	1.49404	-2.17052	0.000821971	yes	OK			CECR6	chr22	17597188	17602257	1.47405	0.34817	-2.08192	0.000821971	yes	OK
									DLK1	chr14	101193201	101201529	24.2427	4.92604	-2.29905	0.000821971	yes	OK			SELENBP1	chr1	151336748	151345164	96.3785	21.2061	-2.18423	0.000821971	yes	OK			RRAS	chr19	50138545	50143400	59.6078	14.0778	-2.08208	0.000821971	yes	OK
									COL9A2	chr1	40766162	40782939	14.9089	3.02264	-2.30229	0.000821971	yes	OK			RNF130	chr5	179382242	179499114	194.422	42.7579	-2.18493	0.000821971	yes	OK			FAM125B	chr9	129089122	129269320	4.64859	1.09246	-2.08921	0.000821971	yes	OK
									MORN4	chr10	99374307	99393913	14.6717	2.96291	-2.30795	0.000821971	yes	OK			CPQ	chr8	97657498	98155722	4.58592	1.0083	-2.18529	0.000821971	yes	OK			LOC727982	chr2	4675806	4703812	2.10593	0.491027	-2.10058	0.000821971	yes	OK
									PCBP4	chr3	51989329	52001482	109.833	22.1749	-2.3083	0.000821971	yes	OK			BNIP3L	chr8	26240145	26270644	37.5281	8.24998	-2.18551	0.000821971	yes	OK			TYRO3	chr15	41851154	41871674	38.6051	8.9934	-2.10185	0.000821971	yes	OK
									TSPY26P	chr20	30774284	30778163	10.3608	2.09145	-2.30856	0.000821971	yes	OK			SPOCK1	chr5	136310986	136835018	17.7725	3.89751	-2.18902	0.000821971	yes	OK			MED12	chrX	70338405	70362442	9.67469	2.25351	-2.10204	0.000821971	yes	OK
									LOC339524	chr1	87595447	87634886	1.89358	0.382142	-2.30894	0.000821971	yes	OK			TYRO3	chr15	41851154	41871674	38.6051	8.44628	-2.1924	0.000821971	yes	OK			MST1R	chr3	49924435	49941306	3.66445	0.850026	-2.10802	0.000821971	yes	OK
									FAM86HP	chr3	129800673	129830276	3.07611	0.61649	-2.31896	0.000821971	yes	OK			LOXL1	chr15	74208485	74244478	50.782	11.1096	-2.19252	0.000821971	yes	OK			TET3	chr2	74273449	74335302	1.62965	0.37769	-2.10929	0.000821971	yes	OK
									HSPG2	chr1	22138757	22263750	4.81391	0.960084	-2.32598	0.000821971	yes	OK			DLK1	chr14	101193201	101201529	24.2427	5.29746	-2.19418	0.000821971	yes	OK			SEC31B	chr10	102246402	102279595	1.86807	0.432508	-2.11075	0.000821971	yes	OK
									RHPN1	chr8	144451024	144466390	14.7582	2.9429	-2.3262	0.000821971	yes	OK			EPHB6	chr7	142552791	142568847	4.45029	0.971067	-2.19626	0.000821971	yes	OK			C17orf100	chr17	6555058	6556617	5.33848	1.2357	-2.1111	0.000821971	yes	OK
									TNFAIP3	chr6	138188580	138204452	10.1253	2.01338	-2.33028	0.000821971	yes	OK			TSPAN7	chrX	38420730	38548172	16.9206	3.69106	-2.19667	0.000821971	yes	OK			ING4	chr12	6759499	6772308	23.4862	5.43332	-2.11191	0.000821971	yes	OK
									C7orf60	chr7	112459201	112579932	3.71725	0.738232	-2.33209	0.000821971	yes	OK			SLC8A2	chr19	47931278	47975307	1.46697	0.319207	-2.20027	0.000821971	yes	OK			GPR56	chr16	57653909	57698944	3.26046	0.750026	-2.12006	0.000821971	yes	OK
									GLT25D2	chr1	183904962	184006863	4.57178	0.906268	-2.33475	0.000821971	yes	OK			ARHGAP28	chr18	6729713	6915712	4.34853	0.945598	-2.20123	0.000821971	yes	OK			PNMAL1	chr19	46969747	46974820	19.6848	4.51601	-2.12396	0.000821971	yes	OK
									ZDHHC1	chr16	67428321	67450403	15.6833	3.10051	-2.33865	0.000821971	yes	OK			CCNB3	chrX	50027539	50094911	1.34376	0.291611	-2.20416	0.000821971	yes	OK			TCL6	chr14	96086875	96139789	7.63546	1.74472	-2.12972	0.000821971	yes	OK
									STAT5A	chr17	40439564	40463960	2.12084	0.417175	-2.34591	0.000821971	yes	OK			ZFHX3	chr16	72699149	73092534	0.970088	0.210107	-2.20699	0.000821971	yes	OK			PCDHB14	chr5	140603077	140605860	4.06581	0.928832	-2.13005	0.000821971	yes	OK
									CTSO	chr4	156845269	156875048	2.74496	0.539757	-2.3464	0.000821971	yes	OK			ATP1B2	chr17	7554253	7561089	22.0843	4.77993	-2.20796	0.000821971	yes	OK			SP8	chr7	20821071	20826508	2.28487	0.521601	-2.13109	0.000821971	yes	OK
									DLL1	chr6	170591293	170599697	22.658	4.45388	-2.34688	0.000821971	yes	OK			COL4A5	chrX	107683073	107940775	11.3899	2.45506	-2.21393	0.000821971	yes	OK			FAM50B	chr6	3849631	3851551	12.1046	2.75888	-2.1334	0.000821971	yes	OK
									MMP2	chr16	55513080	55540586	43.7427	8.58057	-2.3499	0.000821971	yes	OK			WSCD1	chr17	5973933	6027747	6.82858	1.47091	-2.21488	0.000821971	yes	OK			CLSTN3	chr12	7282966	7311539	14.1567	3.22599	-2.13367	0.000821971	yes	OK
									EMID1	chr22	29601829	29655587	42.4489	8.32531	-2.35015	0.000821971	yes	OK			EPHB1	chr3	134514098	134979307	8.04145	1.73153	-2.21541	0.000821971	yes	OK			HPS1,MIR4685	chr10	100175954	100206705	83.553	18.9843	-2.13789	0.000821971	yes	OK
									NHSL2	chrX	71130756	71363424	7.12586	1.39647	-2.35128	0.000821971	yes	OK			NOS3	chr7	150688143	150721586	31.1136	6.66568	-2.22272	0.000821971	yes	OK			GAB2	chr11	77926335	78128868	1.38599	0.31447	-2.13992	0.000821971	yes	OK
									TMEM35	chrX	100333835	100351355	4.96474	0.9721	-2.35254	0.000821971	yes	OK			EFS	chr14	23825610	23834842	8.69893	1.86329	-2.22298	0.000821971	yes	OK			CERCAM	chr9	131181826	131201758	76.2886	17.2775	-2.14257	0.000821971	yes	OK
									ID3	chr1	23884353	23886285	82.1084	16.0716	-2.35302	0.000821971	yes	OK			ALS2CR8	chr2	203776977	203851060	1.78077	0.381311	-2.22346	0.000821971	yes	OK			ADAM32	chr8	38965049	39142436	1.19123	0.269512	-2.14403	0.000821971	yes	OK
									FKBP10	chr17	39958200	39979469	28.7055	5.61319	-2.35443	0.000821971	yes	OK			JAM2	chr21	27011588	27087857	3.18283	0.679506	-2.22775	0.000821971	yes	OK			NRCAM	chr7	107788070	108096841	4.18828	0.946414	-2.14582	0.000821971	yes	OK
									ADAMTS7	chr15	79051541	79103794	15.201	2.96643	-2.35736	0.000821971	yes	OK			SOBP	chr6	107811316	107982513	1.17615	0.250916	-2.22879	0.000821971	yes	OK			CACNA1A	chr19	13317127	13617274	5.50998	1.2448	-2.14613	0.000821971	yes	OK
									TSPAN2	chr1	115590446	115632121	3.90702	0.762396	-2.35746	0.000821971	yes	OK			CDH6	chr5	31193761	31329253	4.02624	0.858145	-2.23014	0.000821971	yes	OK			MXRA7	chr17	74671808	74707056	21.0674	4.74878	-2.14939	0.000821971	yes	OK
									RNF157	chr17	74132414	74236564	9.91465	1.92825	-2.36227	0.000821971	yes	OK			EXD3	chr9	140201347	140317714	9.78946	2.07655	-2.23704	0.000821971	yes	OK			COL4A6	chrX	107398836	107682704	2.5599	0.57509	-2.15423	0.000821971	yes	OK
									LOC727982	chr2	4675806	4703812	2.10593	0.408192	-2.36714	0.000821971	yes	OK			PTPRN2	chr7	157331749	158380482	5.34953	1.13222	-2.24026	0.000821971	yes	OK			TRIM45	chr1	117653673	117664411	9.34982	2.09916	-2.15512	0.000821971	yes	OK
									TMEM8B	chr9	35829221	35855330	11.4201	2.21137	-2.36856	0.000821971	yes	OK			CDK14	chr7	90225674	90839904	4.09097	0.864884	-2.24186	0.000821971	yes	OK			RIMS3	chr1	41086351	41131335	3.26324	0.731099	-2.15817	0.000821971	yes	OK
									ATG16L2	chr11	72525450	72540680	17.8092	3.44616	-2.36956	0.000821971	yes	OK			NRIP1	chr21	16333480	16437314	8.51957	1.79838	-2.24409	0.000821971	yes	OK			STMN2	chr8	80523048	80578495	173.349	38.7648	-2.16086	0.000821971	yes	OK
									IGLON5	chr19	51815101	51834102	2.29654	0.443388	-2.37282	0.000821971	yes	OK			MSRB3	chr12	65672422	65860687	3.58511	0.75337	-2.25058	0.000821971	yes	OK			CDH6	chr5	31193761	31329253	4.02624	0.894118	-2.1709	0.000821971	yes	OK
									ZNF25	chr10	38238794	38265453	1.25242	0.241442	-2.37497	0.000821971	yes	OK			LOC729970	chr1	95392841	95428826	9.99409	2.09752	-2.25239	0.000821971	yes	OK			SH3BGRL	chrX	80369199	80554325	33.4297	7.39276	-2.17694	0.000821971	yes	OK
									SCUBE1	chr22	43599228	43739394	3.33299	0.641697	-2.37685	0.000821971	yes	OK			GADD45G	chr9	92219926	92221693	79.9634	16.7692	-2.25352	0.000821971	yes	OK			GSTM3	chr1	110276553	110283660	9.99606	2.20987	-2.1774	0.000821971	yes	OK
									IGFBP4	chr17	38599675	38613982	73.8406	14.2037	-2.37815	0.000821971	yes	OK			PRSS46,PRSS50	chr3	46753605	46790136	5.37645	1.1269	-2.25429	0.000821971	yes	OK			ELAVL4	chr1	50513685	50667540	3.59504	0.794568	-2.17776	0.000821971	yes	OK
									LOC100131564	chr1	93770943	93811368	9.88715	1.89413	-2.38402	0.000821971	yes	OK			LPHN3	chr4	62066066	62938326	11.6157	2.43352	-2.25497	0.000821971	yes	OK			BTBD3	chr20	11871476	11907245	32.6174	7.1942	-2.18074	0.000821971	yes	OK
									CST3	chr20	23595967	23618574	647.803	123.924	-2.3861	0.000821971	yes	OK			SPSB4	chr3	140770742	140867453	11.9794	2.50909	-2.25532	0.000821971	yes	OK			NKAIN4	chr20	61872134	61892967	21.925	4.82801	-2.18308	0.000821971	yes	OK
									COL2A1	chr12	48366745	48398285	33.3805	6.38499	-2.38625	0.000821971	yes	OK			C6orf174,KIAA0408	chr6	127759550	127840500	6.04255	1.26543	-2.25553	0.000821971	yes	OK			PREX1	chr20	47240786	47444539	66.4044	14.6203	-2.18331	0.000821971	yes	OK
									CALCOCO1	chr12	54104896	54121307	30.9687	5.92175	-2.38671	0.000821971	yes	OK			RPH3AL	chr17	62179	202633	4.97326	1.04112	-2.25605	0.000821971	yes	OK			C20orf112	chr20	31030861	31172875	14.7353	3.24294	-2.1839	0.000821971	yes	OK
									C8orf51	chr8	144448792	144450805	2.42588	0.461097	-2.39536	0.000821971	yes	OK			BCAT2	chr19	49298316	49314657	83.8017	17.5357	-2.25668	0.000821971	yes	OK			H2AFY2	chr10	71812356	71892690	60.6669	13.3224	-2.18706	0.000821971	yes	OK
									PPP1R1A	chr12	54943176	54982443	21.4213	4.0611	-2.39911	0.000821971	yes	OK			CACNA1A	chr19	13317127	13617274	5.50998	1.13614	-2.27791	0.000821971	yes	OK			C17orf57	chr17	45399632	45518677	0.854225	0.187467	-2.18798	0.000821971	yes	OK
									RGS3	chr9	116207010	116360018	15.5616	2.94517	-2.40156	0.000821971	yes	OK			GNG12	chr1	68167148	68698284	10.0746	2.07715	-2.27805	0.000821971	yes	OK			CXorf57	chrX	105855159	105922673	7.25867	1.59032	-2.19039	0.000821971	yes	OK
									ADA	chr20	43247753	43280376	114.057	21.5192	-2.40606	0.000821971	yes	OK			NAB1	chr2	191513669	191557495	4.69018	0.964967	-2.28109	0.000821971	yes	OK			PDGFRB	chr5	149493401	149535422	2.03439	0.443636	-2.19715	0.000821971	yes	OK
									FBN1	chr15	48700502	48937985	3.24139	0.611474	-2.40625	0.000821971	yes	OK			PREX1	chr20	47240786	47444539	66.4044	13.6536	-2.282	0.000821971	yes	OK			KIAA1407	chr3	113682983	113775460	1.06452	0.231371	-2.20192	0.000821971	yes	OK
									GSTM3	chr1	110276553	110283660	9.99606	1.88356	-2.40789	0.000821971	yes	OK			CPAMD8	chr19	17003761	17137625	2.51541	0.515603	-2.28646	0.000821971	yes	OK			CEP112	chr17	63631657	64188212	2.98535	0.647118	-2.2058	0.000821971	yes	OK
									ENPEP	chr4	111397228	111484493	1.7336	0.325455	-2.41324	0.000821971	yes	OK			C12orf53	chr12	6802955	6810009	8.99945	1.8349	-2.29413	0.000821971	yes	OK			PAK3	chrX	110187512	110464173	2.13646	0.463047	-2.20599	0.000821971	yes	OK
									KCNE1L	chrX	108866928	108868393	6.06559	1.13752	-2.41475	0.000821971	yes	OK			ADCY6,MIR4701	chr12	49159948	49182820	8.28289	1.68055	-2.3012	0.000821971	yes	OK			C14orf39	chr14	60902673	60952784	4.49344	0.971857	-2.20901	0.000821971	yes	OK
									PCDHB14	chr5	140603077	140605860	4.06581	0.762117	-2.41546	0.000821971	yes	OK			RNF157	chr17	74132414	74236564	9.91465	2.00532	-2.30573	0.000821971	yes	OK			AMPH	chr7	38423296	38671167	5.85418	1.26075	-2.21519	0.000821971	yes	OK
									FBLN2	chr3	13590624	13679922	62.0133	11.6008	-2.41835	0.000821971	yes	OK			NUCB2	chr11	17298285	17353382	36.0068	7.28037	-2.30618	0.000821971	yes	OK			PELI2	chr14	56584999	56768031	5.25352	1.13131	-2.21529	0.000821971	yes	OK
									COL4A5	chrX	107683073	107940775	11.3899	2.1303	-2.41863	0.000821971	yes	OK			TCTN1	chr12	111051831	111127617	18.6273	3.76	-2.30862	0.000821971	yes	OK			GRIP1	chr12	66741117	67072925	4.01437	0.86396	-2.21614	0.000821971	yes	OK
									SALL2	chr14	21945334	22005337	36.8065	6.87636	-2.42024	0.000821971	yes	OK			HFM1	chr1	91726319	91870426	5.57048	1.12315	-2.31025	0.000821971	yes	OK			TMEM45A	chr3	100211462	100296289	6.75373	1.45149	-2.21815	0.000821971	yes	OK
									FGFR1	chr8	38268402	38326352	307.907	57.445	-2.42224	0.000821971	yes	OK			ARMC4	chr10	28101096	28287977	1.38109	0.276454	-2.3207	0.000821971	yes	OK			FNDC5	chr1	33327868	33338082	2.50218	0.535617	-2.22391	0.000821971	yes	OK
									FBXO4	chr5	41925355	41941732	10.2199	1.90003	-2.42729	0.000821971	yes	OK			CTNND2	chr5	10971951	11904502	5.75356	1.15089	-2.32171	0.000821971	yes	OK			COL5A2	chr2	189896640	190044605	7.98509	1.70252	-2.22963	0.000821971	yes	OK
									SYP	chrX	49044264	49056661	3.33626	0.617793	-2.43304	0.000821971	yes	OK			METRN	chr16	765127	769733	183.172	36.5996	-2.32329	0.000821971	yes	OK			SELENBP1	chr1	151336748	151345164	96.3785	20.5103	-2.23236	0.000821971	yes	OK
									LEPREL4	chr17	39958200	39979469	35.3108	6.52882	-2.43521	0.000821971	yes	OK			SLC5A12	chr11	26688565	26988963	3.25544	0.647474	-2.32996	0.000821971	yes	OK			SEMA3C	chr7	80371853	80548667	0.774053	0.16451	-2.23426	0.000821971	yes	OK
									SELENBP1	chr1	151336748	151345164	96.3785	17.8	-2.43684	0.000821971	yes	OK			ZFP2	chr5	178322915	178360409	3.20101	0.634861	-2.33402	0.000821971	yes	OK			CD82	chr11	44587140	44641858	39.2775	8.34173	-2.23528	0.000821971	yes	OK
									GPX7	chr1	53068042	53074723	18.7904	3.46826	-2.43772	0.000821971	yes	OK			SIRPA	chr20	1874812	1920540	2.5704	0.50732	-2.34103	0.000821971	yes	OK			CAST	chr5	95997740	96149848	12.2075	2.58182	-2.24131	0.000821971	yes	OK
									RASSF2	chr20	4760667	4804291	10.9399	2.0144	-2.44117	0.000821971	yes	OK			HOXB2	chr17	46619903	46651810	60.3035	11.8942	-2.34198	0.000821971	yes	OK			LINC00087	chrX	134228413	134232733	6.45569	1.36122	-2.24567	0.000821971	yes	OK
									THY1	chr11	119252487	119369944	156.636	28.8124	-2.44266	0.000821971	yes	OK			FBN1	chr15	48700502	48937985	3.24139	0.63926	-2.34214	0.000821971	yes	OK			JAKMIP2	chr5	146939556	147162292	12.5931	2.65003	-2.24855	0.000821971	yes	OK
									TEX14	chr17	56634037	56769416	1.85422	0.340917	-2.44332	0.000821971	yes	OK			COL11A1	chr1	103342022	103574080	5.59601	1.10147	-2.34497	0.000821971	yes	OK			OPTN	chr10	13142081	13180301	18.391	3.8475	-2.257	0.000821971	yes	OK
									TMEM145	chr19	42817476	42829214	3.39004	0.621116	-2.44837	0.000821971	yes	OK			GLRB	chr4	157997276	158093242	1.88689	0.370624	-2.34798	0.000821971	yes	OK			MN1	chr22	28140997	28197486	4.54011	0.94685	-2.26152	0.000821971	yes	OK
									MAP2	chr2	210288770	210598882	11.8031	2.15929	-2.45054	0.000821971	yes	OK			CERCAM	chr9	131181826	131201758	76.2886	14.9128	-2.35492	0.000821971	yes	OK			S100A4	chr1	153516087	153518282	2516.04	524.374	-2.26249	0.000821971	yes	OK
									PTPRN2	chr7	157331749	158380482	5.34953	0.978457	-2.45083	0.000821971	yes	OK			PRKCE	chr2	45879042	46415129	1.14901	0.223922	-2.35932	0.000821971	yes	OK			FAM214A	chr15	52873517	52970820	1.93878	0.404013	-2.26267	0.000821971	yes	OK
									CORO2B	chr15	68871307	69020144	2.68055	0.488925	-2.45484	0.000821971	yes	OK			PTGDS	chr9	139871955	139876194	11.915	2.32202	-2.35933	0.000821971	yes	OK			CDH2	chr18	25521085	25758017	88.2013	18.3507	-2.26496	0.000821971	yes	OK
									THNSL2	chr2	88469813	88486287	13.0848	2.38587	-2.45531	0.000821971	yes	OK			COL9A1	chr6	70925742	71012786	4.9815	0.963885	-2.36965	0.000821971	yes	OK			WDTC1	chr1	27561006	27635110	4.21492	0.875875	-2.26671	0.000821971	yes	OK
									C14orf39	chr14	60902673	60952784	4.49344	0.815815	-2.46151	0.000821971	yes	OK			CCDC36	chr3	49235860	49295537	1.40904	0.271466	-2.37587	0.000821971	yes	OK			CYBRD1	chr2	172378865	172414643	1.51291	0.31399	-2.26853	0.000821971	yes	OK
									CAHM	chr6	163834096	163834982	11.4063	2.06442	-2.46602	0.000821971	yes	OK			FXYD2,FXYD6,FXYD6-FXYD2	chr11	117690789	117748201	59.2524	11.3732	-2.38123	0.000821971	yes	OK			GADD45G	chr9	92219926	92221693	79.9634	16.5851	-2.26945	0.000821971	yes	OK
									FBXL19,ORAI3,SETD1A	chr16	30935426	30996024	28.8386	5.2005	-2.47128	0.000821971	yes	OK			CX3CL1	chr16	57406413	57418956	4.85913	0.93127	-2.38343	0.000821971	yes	OK			CES3	chr16	66995131	67009052	1.775	0.368014	-2.26999	0.000821971	yes	OK
									COL6A2	chr21	47518032	47552763	112.261	20.2282	-2.47243	0.000821971	yes	OK			VGF	chr7	100805787	100823557	50.4046	9.63779	-2.38678	0.000821971	yes	OK			IDUA	chr4	972862	998394	8.92557	1.84951	-2.2708	0.000821971	yes	OK
									ID2	chr2	8822109	8824589	59.3182	10.6876	-2.47254	0.000821971	yes	OK			NAALAD2	chr11	89867817	89925779	7.03874	1.34005	-2.39303	0.000821971	yes	OK			ZNF219	chr14	21538368	21572863	51.3746	10.6407	-2.27146	0.000821971	yes	OK
									JAK3	chr19	17935592	17958841	3.01361	0.539862	-2.48083	0.000821971	yes	OK			CELSR2	chr1	109792221	109825790	16.2372	3.08012	-2.39824	0.000821971	yes	OK			MARCKS	chr6	114178526	114184811	56.6474	11.7189	-2.27317	0.000821971	yes	OK
									PREX1	chr20	47240786	47444539	66.4044	11.8695	-2.48402	0.000821971	yes	OK			H2AFY2	chr10	71812356	71892690	60.6669	11.416	-2.40985	0.000821971	yes	OK			C5orf54	chr5	159820067	159827060	4.83683	0.999319	-2.27505	0.000821971	yes	OK
									PCDH11X	chrX	91034259	91878228	3.4301	0.612756	-2.48487	0.000821971	yes	OK			TXNIP	chr1	145438461	145442628	267.819	50.3572	-2.41099	0.000821971	yes	OK			ZADH2	chr18	72909277	72921281	0.824389	0.170067	-2.27723	0.000821971	yes	OK
									PTGDS	chr9	139871955	139876194	11.915	2.12801	-2.48521	0.000821971	yes	OK			HS3ST3B1	chr17	14204318	14252718	3.7513	0.704014	-2.41371	0.000821971	yes	OK			ACBD4	chr17	43209966	43221543	8.67362	1.78022	-2.28458	0.000821971	yes	OK
									DICER1-AS1	chr14	95624024	95646270	10.2372	1.82598	-2.48708	0.000821971	yes	OK			TMEM95	chr17	7255207	7275519	6.47917	1.21386	-2.41621	0.000821971	yes	OK			CECR7	chr22	17517459	17551564	12.5136	2.56368	-2.28721	0.000821971	yes	OK
									CXCL5	chr4	74861358	74864416	3.25563	0.58039	-2.48784	0.000821971	yes	OK			FBXO4	chr5	41925355	41941732	10.2199	1.91226	-2.41803	0.000821971	yes	OK			FOS	chr14	75745480	75748937	186.47	38.199	-2.28734	0.000821971	yes	OK
									AOC3	chr17	41003200	41024448	1.99321	0.355274	-2.48809	0.000821971	yes	OK			C4orf34	chr4	39551937	39640672	41.1695	7.68845	-2.42081	0.000821971	yes	OK			PRKCG	chr19	54385459	54446969	21.2554	4.33931	-2.29229	0.000821971	yes	OK
									PTGS1	chr9	125133228	125157981	2.49652	0.4445	-2.48966	0.000821971	yes	OK			GNG2	chr14	52327021	52436518	19.5099	3.60537	-2.43599	0.000821971	yes	OK			DLL1	chr6	170591293	170599697	22.658	4.58791	-2.30411	0.000821971	yes	OK
									MIR3605,PHC2	chr1	33774372	33841194	79.6389	14.1006	-2.49772	0.000821971	yes	OK			LILRB1,LILRB4	chr19	55128628	55179957	4.18243	0.765103	-2.45062	0.000821971	yes	OK			NUCB2	chr11	17298285	17353382	36.0068	7.26534	-2.30917	0.000821971	yes	OK
									COL11A1	chr1	103342022	103574080	5.59601	0.988822	-2.50062	0.000821971	yes	OK			NID1	chr1	236139131	236228481	107.282	19.6118	-2.45161	0.000821971	yes	OK			CPQ	chr8	97657498	98155722	4.58592	0.920231	-2.31714	0.000821971	yes	OK
									SFRP2	chr4	154701741	154710228	172.623	30.4696	-2.50218	0.000821971	yes	OK			AKD1	chr6	109814058	110012415	1.784	0.324599	-2.45838	0.000821971	yes	OK			VASH1	chr14	77227856	77249363	15.3952	3.08907	-2.31724	0.000821971	yes	OK
									NPFFR2	chr4	72897520	73013918	1.39444	0.246125	-2.50222	0.000821971	yes	OK			CD99L2	chrX	149934806	150067289	29.2157	5.29659	-2.46361	0.000821971	yes	OK			GJA5	chr1	147228331	147245484	2.64388	0.528524	-2.32261	0.000821971	yes	OK
									CES1	chr16	55836763	55867075	4.38645	0.770249	-2.50966	0.000821971	yes	OK			HOMER3	chr19	19039930	19052041	60.9964	11.0138	-2.46941	0.000821971	yes	OK			ACBD7	chr10	15117473	15130775	2.23006	0.444153	-2.32796	0.000821971	yes	OK
									MAPRE3	chr2	27193502	27250087	17.2564	3.01224	-2.51823	0.000821971	yes	OK			ANK2	chr4	113739238	114304897	17.6288	3.18307	-2.46945	0.000821971	yes	OK			SIRPA	chr20	1874812	1920540	2.5704	0.509497	-2.33485	0.000821971	yes	OK
									EPHA3	chr3	89156673	89531439	22.3475	3.88289	-2.52491	0.000821971	yes	OK			ELOVL2	chr6	10980992	11079377	1.30762	0.236026	-2.46993	0.000821971	yes	OK			MIR1909,REXO1	chr19	1815151	1848452	49.7462	9.84494	-2.33713	0.000821971	yes	OK
									KLK10	chr19	51515999	51523431	0.922967	0.159686	-2.53104	0.000821971	yes	OK			PRKACB	chr1	84543744	84704181	10.7953	1.94402	-2.47328	0.000821971	yes	OK			CELSR2	chr1	109792221	109825790	16.2372	3.21242	-2.33757	0.000821971	yes	OK
									GAS1	chr9	89559276	89562104	14.9863	2.58513	-2.53533	0.000821971	yes	OK			LINGO1	chr15	77905354	77983244	74.0441	13.2875	-2.47831	0.000821971	yes	OK			MIR564,TMEM42	chr3	44903379	44907157	41.8363	8.27191	-2.33846	0.000821971	yes	OK
									IMMP2L	chr7	110302976	111202573	9.8904	1.70462	-2.53658	0.000821971	yes	OK			PRKCG	chr19	54385459	54446969	21.2554	3.78863	-2.48808	0.000821971	yes	OK			PRAF2	chrX	48928817	48931662	85.9022	16.9799	-2.33887	0.000821971	yes	OK
									FAM176B	chr1	36787228	36790506	44.1051	7.58526	-2.53968	0.000821971	yes	OK			KHDRBS2	chr6	62389864	62996122	2.78823	0.496765	-2.48871	0.000821971	yes	OK			SEC16B	chr1	177897922	177953397	3.56887	0.703405	-2.34304	0.000821971	yes	OK
									C12orf68	chr12	48577365	48579709	3.65075	0.627205	-2.54118	0.000821971	yes	OK			TAC3	chr12	57403780	57410344	67.1092	11.9518	-2.48929	0.000821971	yes	OK			CCNB3	chrX	50027539	50094911	1.34376	0.264772	-2.34346	0.000821971	yes	OK
									OLFML2B	chr1	161952930	161993644	8.92847	1.53241	-2.54261	0.000821971	yes	OK			PLEKHG4	chr16	67311309	67360661	25.5375	4.53832	-2.49239	0.000821971	yes	OK			FAM47E,FAM47E-STBD1,STBD1	chr4	77135192	77232315	9.54361	1.8781	-2.34526	0.000821971	yes	OK
									C9orf167	chr9	140172279	140177093	4.29128	0.736248	-2.54314	0.000821971	yes	OK			ZDHHC1	chr16	67428321	67450403	15.6833	2.78585	-2.49304	0.000821971	yes	OK			PAM	chr5	102090972	102366808	20.7384	4.07568	-2.34719	0.000821971	yes	OK
									ZNF467	chr7	149461452	149470295	3.44245	0.590338	-2.54382	0.000821971	yes	OK			ASCL1	chr12	103351451	103354294	1.98246	0.351629	-2.49517	0.000821971	yes	OK			ZFP36L1	chr14	69254371	69262960	71.9894	14.1128	-2.35078	0.000821971	yes	OK
									ZFP36L1	chr14	69254371	69262960	71.9894	12.2475	-2.5553	0.000821971	yes	OK			TMEM59L	chr19	18723681	18731849	16.8065	2.96274	-2.50402	0.000821971	yes	OK			LINGO2	chr9	27948527	28719303	1.94704	0.38151	-2.35149	0.000821971	yes	OK
									CADM1	chr11	115044344	115375241	25.8962	4.39609	-2.55845	0.000821971	yes	OK			NDNF	chr4	121956781	121993673	1.72573	0.303825	-2.50589	0.000821971	yes	OK			SLC2A10	chr20	45338278	45364985	8.80522	1.71126	-2.3633	0.000821971	yes	OK
									NAB2	chr12	57482676	57505196	17.4453	2.95887	-2.55972	0.000821971	yes	OK			ZFP36L1	chr14	69254371	69262960	71.9894	12.6741	-2.5059	0.000821971	yes	OK			L3MBTL1	chr20	42136319	42179671	10.0168	1.94261	-2.36635	0.000821971	yes	OK
									SYNGR1	chr22	39745953	39781593	26.9715	4.56959	-2.5613	0.000821971	yes	OK			CTF1	chr16	30907927	30914881	6.07528	1.06333	-2.51436	0.000821971	yes	OK			CBX8	chr17	77768175	77770915	8.39245	1.62757	-2.36637	0.000821971	yes	OK
									ZNF436	chr1	23685940	23698330	2.99537	0.507094	-2.56241	0.000821971	yes	OK			SALL2	chr14	21945334	22005337	36.8065	6.40852	-2.5219	0.000821971	yes	OK			ZNF362	chr1	33721951	33766320	16.6752	3.23093	-2.36768	0.000821971	yes	OK
									PLXNC1	chr12	94542498	94701451	3.5935	0.60757	-2.56427	0.000821971	yes	OK			S100A4	chr1	153516087	153518282	2516.04	437.661	-2.52327	0.000821971	yes	OK			PKI55	chr2	217081611	217084915	1.08221	0.209616	-2.36816	0.000821971	yes	OK
									PRAF2	chrX	48928817	48931662	85.9022	14.5177	-2.56488	0.000821971	yes	OK			HLA-B	chr6_qbl_hap6	2615164	2618505	11.6963	2.03335	-2.52412	0.000821971	yes	OK			TTC28	chr22	28315363	29075853	7.90046	1.5298	-2.3686	0.000821971	yes	OK
									COL9A1	chr6	70925742	71012786	4.9815	0.841617	-2.56534	0.000821971	yes	OK			FAM65B	chr6	24804512	24911195	1.99835	0.345546	-2.53186	0.000821971	yes	OK			RGS6	chr14	72398816	73033238	1.75835	0.33878	-2.3758	0.000821971	yes	OK
									JAM2	chr21	27011588	27087857	3.18283	0.537583	-2.56575	0.000821971	yes	OK			WFIKKN1	chr16	681011	684116	89.936	15.5463	-2.53232	0.000821971	yes	OK			ARHGAP28	chr18	6729713	6915712	4.34853	0.83429	-2.38191	0.000821971	yes	OK
									HIST2H2BE	chr1	149856009	149858232	8.15809	1.3743	-2.56954	0.000821971	yes	OK			DMD	chrX	31137338	33357726	25.1758	4.32704	-2.54059	0.000821971	yes	OK			IGFBP2	chr2	217498114	217532457	1180.73	226.373	-2.38291	0.000821971	yes	OK
									PRKCG	chr19	54385459	54446969	21.2554	3.57403	-2.5722	0.000821971	yes	OK			FMOD	chr1	203309751	203320289	2.17739	0.374092	-2.54113	0.000821971	yes	OK			NAALAD2	chr11	89867817	89925779	7.03874	1.3482	-2.38429	0.000821971	yes	OK
									CCDC92	chr12	124247041	124457257	15.8976	2.67181	-2.57292	0.000821971	yes	OK			CCDC159	chr19	11457180	11465620	5.86115	1.00189	-2.54845	0.000821971	yes	OK			NELL2	chr12	44902057	45307711	36.4618	6.96896	-2.38737	0.000821971	yes	OK
									ZNF521	chr18	22641887	22932214	7.58177	1.27397	-2.5732	0.000821971	yes	OK			CPXM1	chr20	2774600	2781311	308.668	52.2874	-2.56152	0.000821971	yes	OK			CAP2	chr6	17393735	17558023	18.3785	3.51005	-2.38846	0.000821971	yes	OK
									TTYH1	chr19	54926604	54948169	1121.87	188.347	-2.57444	0.000821971	yes	OK			EML1	chr14	100259744	100408395	18.1947	3.06431	-2.56989	0.000821971	yes	OK			HOMER3	chr19	19039930	19052041	60.9964	11.6423	-2.38935	0.000821971	yes	OK
									LOC100506433	chr14	48151653	48264217	31.9534	5.35689	-2.5765	0.000821971	yes	OK			S1PR1	chr1	101702304	101707076	2.24026	0.37641	-2.57329	0.000821971	yes	OK			FOSB	chr19	45971252	45978437	2.82882	0.536907	-2.39745	0.000821971	yes	OK
									CD99L2	chrX	149934806	150067289	29.2157	4.8834	-2.58079	0.000821971	yes	OK			IGDCC3	chr15	65619462	65670398	144.082	24.2047	-2.57353	0.000821971	yes	OK			C12orf53	chr12	6802955	6810009	8.99945	1.70487	-2.40018	0.000821971	yes	OK
									LPHN3	chr4	62066066	62938326	11.6157	1.93711	-2.5841	0.000821971	yes	OK			ZNF25	chr10	38238794	38265453	1.25242	0.209458	-2.57998	0.000821971	yes	OK			SOX11	chr2	5832798	5848284	2.92068	0.551763	-2.40418	0.000821971	yes	OK
									MEIS3	chr19	47906380	47922787	36.5751	6.07896	-2.58897	0.000821971	yes	OK			GRIK5	chr19	42502472	42574287	3.43524	0.573282	-2.5831	0.000821971	yes	OK			TMEM55A	chr8	92006104	92053203	13.0326	2.45985	-2.40548	0.000821971	yes	OK
									HEY1	chr8	80676244	80680098	4.63681	0.767148	-2.59556	0.000821971	yes	OK			PMEL	chr12	56278763	56360496	264.062	44.0445	-2.58384	0.000821971	yes	OK			RFX3	chr9	3223224	3525983	3.09921	0.58399	-2.40789	0.000821971	yes	OK
									SP110	chr2	231033644	231090444	4.92034	0.810278	-2.60227	0.000821971	yes	OK			PTPRZ1	chr7	121512976	121702096	64.1388	10.649	-2.59048	0.000821971	yes	OK			TXNIP	chr1	145438461	145442628	267.819	50.3019	-2.41257	0.000821971	yes	OK
									FST	chr5	52776076	52783020	137.593	22.5779	-2.60742	0.000821971	yes	OK			FLJ31485	chr12	130636077	130646845	2.80159	0.464839	-2.59144	0.000821971	yes	OK			C14orf159	chr14	91337166	91691806	27.7706	5.19548	-2.41823	0.000821971	yes	OK
									TYRO3	chr15	41851154	41871674	38.6051	6.33337	-2.60775	0.000821971	yes	OK			SLITRK5	chr13	88324869	88331870	7.10105	1.17736	-2.59248	0.000821971	yes	OK			NID1	chr1	236139131	236228481	107.282	20.0484	-2.41985	0.000821971	yes	OK
									SEMA3A	chr7	83586191	83824416	15.9165	2.60531	-2.61099	0.000821971	yes	OK			CYTL1	chr4	5015871	5021197	9.76841	1.61954	-2.59254	0.000821971	yes	OK			VGF	chr7	100805787	100823557	50.4046	9.41507	-2.42051	0.000821971	yes	OK
									LOC283481	chr13	102373204	103054124	21.2526	3.46533	-2.61657	0.000821971	yes	OK			AOC3	chr17	41003200	41024448	1.99321	0.329961	-2.59473	0.000821971	yes	OK			NME5	chr5	137450860	137475132	4.48296	0.837196	-2.42082	0.000821971	yes	OK
									DPYSL4	chr10	134000413	134019280	3.79095	0.617261	-2.61861	0.000821971	yes	OK			THNSL2	chr2	88469813	88486287	13.0848	2.15992	-2.59885	0.000821971	yes	OK			TCTN1	chr12	111051831	111127617	18.6273	3.47146	-2.42381	0.000821971	yes	OK
									PARP10	chr8	145051319	145060635	2.25666	0.363896	-2.63259	0.000821971	yes	OK			CCDC144NL	chr17	20766707	20833420	22.8008	3.76111	-2.59986	0.000821971	yes	OK			ZNF333	chr19	14800869	14832070	10.4056	1.93608	-2.42615	0.000821971	yes	OK
									NID1	chr1	236139131	236228481	107.282	17.2886	-2.63351	0.000821971	yes	OK			GFRA2	chr8	21549529	21646346	2.21613	0.36452	-2.60397	0.000821971	yes	OK			LTBP2	chr14	74964885	75079034	1.58	0.293643	-2.42779	0.000821971	yes	OK
									NUDT19	chr19	33182866	33204702	4.5081	0.725645	-2.63518	0.000821971	yes	OK			TMEM35	chrX	100333835	100351355	4.96474	0.816467	-2.60425	0.000821971	yes	OK			NLGN4X	chrX	5808082	6146706	1.88815	0.350628	-2.42896	0.000821971	yes	OK
									PRPH	chr12	49688908	49695444	11.4992	1.84714	-2.63816	0.000821971	yes	OK			PPP1R1A	chr12	54943176	54982443	21.4213	3.50613	-2.6111	0.000821971	yes	OK			ST3GAL3	chr1	44173217	44396860	12.6566	2.34459	-2.43247	0.000821971	yes	OK
									PRKCB	chr16	23847299	24231932	7.08702	1.13527	-2.64215	0.000821971	yes	OK			HRC	chr19	49654455	49658681	1.99371	0.325793	-2.61343	0.000821971	yes	OK			RPH3AL	chr17	62179	202633	4.97326	0.9212	-2.43261	0.000821971	yes	OK
									IL32	chr16	3115312	3131894	31.0816	4.97128	-2.64437	0.000821971	yes	OK			ARHGEF17	chr11	73019300	73080425	10.391	1.68646	-2.62326	0.000821971	yes	OK			PKIA	chr8	79428335	79517502	8.40082	1.55309	-2.43539	0.000821971	yes	OK
									TMEM95	chr17	7255207	7275519	6.47917	1.02577	-2.6591	0.000821971	yes	OK			CD3G	chr11	118215058	118225879	4.14869	0.673157	-2.62364	0.000821971	yes	OK			ADA	chr20	43247753	43280376	114.057	21.0842	-2.43552	0.000821971	yes	OK
									CXXC4	chr4	105389445	105416083	5.68359	0.89979	-2.65914	0.000821971	yes	OK			CA11	chr19	49141271	49185502	10.7637	1.74618	-2.6239	0.000821971	yes	OK			HIPK2	chr7	139246315	139477693	2.05389	0.379339	-2.4368	0.000821971	yes	OK
									ANXA9	chr1	150954498	150968114	3.9499	0.624352	-2.66139	0.000821971	yes	OK			ADAM32	chr8	38965049	39142436	1.19123	0.193055	-2.62537	0.000821971	yes	OK			CA11	chr19	49141271	49185502	10.7637	1.98565	-2.43849	0.000821971	yes	OK
									GPM6A	chr4	176554087	176923648	2.11725	0.334405	-2.66252	0.000821971	yes	OK			EXOC6	chr10	94594469	94819251	5.26143	0.845257	-2.63799	0.000821971	yes	OK			GLB1L2	chr11	134201767	134246218	5.44763	1.00377	-2.44019	0.000821971	yes	OK
									OSCP1	chr1	36883506	36916086	6.00907	0.944913	-2.66889	0.000821971	yes	OK			WDR31	chr9	116077917	116102620	2.2065	0.354442	-2.63814	0.000821971	yes	OK			ALDH5A1	chr6	24495051	24537435	3.0284	0.556578	-2.4439	0.000821971	yes	OK
									ACTC1	chr15	35080296	35087927	6.94118	1.0897	-2.67126	0.000821971	yes	OK			LOC100507032	chr3	129612713	129627755	1.27416	0.204003	-2.64288	0.000821971	yes	OK			EXOC6	chr10	94594469	94819251	5.26143	0.966359	-2.44482	0.000821971	yes	OK
									ADCY6,MIR4701	chr12	49159948	49182820	8.28289	1.29847	-2.67332	0.000821971	yes	OK			PNCK	chrX	152935187	152952155	18.7435	2.98546	-2.65036	0.000821971	yes	OK			HDAC9	chr7	18126571	19036992	4.85374	0.890216	-2.44687	0.000821971	yes	OK
									SOX5	chr12	23683907	24715380	0.988528	0.154891	-2.67403	0.000821971	yes	OK			FIGNL2	chr12	52211624	52242412	3.32219	0.528968	-2.65088	0.000821971	yes	OK			ZNRF2P1	chr7	32767561	32794974	3.99092	0.728221	-2.45427	0.000821971	yes	OK
									FAM70A	chrX	119392504	119445391	1.5061	0.233904	-2.68683	0.000821971	yes	OK			NCAM2	chr21	22370632	22912517	6.41386	1.01552	-2.65897	0.000821971	yes	OK			DYRK1B	chr19	40315989	40324841	18.8713	3.43741	-2.4568	0.000821971	yes	OK
									MFAP2	chr1	17300948	17308081	136.814	21.2341	-2.68775	0.000821971	yes	OK			RASSF4	chr10	45455218	45491732	32.8139	5.18937	-2.66067	0.000821971	yes	OK			ADAMTS7	chr15	79051541	79103794	15.201	2.75749	-2.46274	0.000821971	yes	OK
									PTCHD4	chr6	47845763	48036425	1.25376	0.192837	-2.70081	0.000821971	yes	OK			RASSF2	chr20	4760667	4804291	10.9399	1.72609	-2.66402	0.000821971	yes	OK			SYT11	chr1	155829259	155854990	13.4728	2.4377	-2.46646	0.000821971	yes	OK
									THBS3	chr1	155164860	155177772	27.2867	4.1969	-2.70081	0.000821971	yes	OK			SP110	chr2	231033644	231090444	4.92034	0.775096	-2.66631	0.000821971	yes	OK			NUP210	chr3	13357732	13461809	29.9735	5.37898	-2.47828	0.000821971	yes	OK
									TMEM132B	chr12	125670949	126144501	7.80543	1.19139	-2.71183	0.000821971	yes	OK			DLL1	chr6	170591293	170599697	22.658	3.55516	-2.67203	0.000821971	yes	OK			GPR1	chr2	207040041	207082771	3.08031	0.55208	-2.48012	0.000821971	yes	OK
									EFNB1	chrX	68048839	68062006	85.3512	13.0112	-2.71366	0.000821971	yes	OK			NHSL2	chrX	71130756	71363424	7.12586	1.11797	-2.67218	0.000821971	yes	OK			TSPY26P	chr20	30774284	30778163	10.3608	1.85586	-2.48098	0.000821971	yes	OK
									PTPN5	chr11	18749474	18813389	6.25306	0.952261	-2.71513	0.000821971	yes	OK			EMID1	chr22	29601829	29655587	42.4489	6.65696	-2.67279	0.000821971	yes	OK			C6orf225	chr6	112374725	112423993	6.94786	1.24375	-2.48187	0.000821971	yes	OK
									MSRB3	chr12	65672422	65860687	3.58511	0.545866	-2.7154	0.000821971	yes	OK			RHPN1	chr8	144451024	144466390	14.7582	2.30582	-2.67816	0.000821971	yes	OK			ACTN3	chr11	66314390	66330806	37.989	6.7491	-2.49281	0.000821971	yes	OK
									TAC3	chr12	57403780	57410344	67.1092	10.1965	-2.71844	0.000821971	yes	OK			SYP	chrX	49044264	49056661	3.33626	0.520349	-2.68068	0.000821971	yes	OK			ACCS	chr11	44087728	44105730	5.46753	0.970891	-2.49351	0.000821971	yes	OK
									AGPAT3	chr21	45285115	45407475	4.12296	0.62391	-2.72427	0.000821971	yes	OK			CALCOCO1	chr12	54104896	54121307	30.9687	4.81966	-2.68381	0.000821971	yes	OK			FAM116B	chr22	50750391	50765489	4.50061	0.798661	-2.49447	0.000821971	yes	OK
									RPH3AL	chr17	62179	202633	4.97326	0.751528	-2.72629	0.000821971	yes	OK			MIR1909,REXO1	chr19	1815151	1848452	49.7462	7.73909	-2.68435	0.000821971	yes	OK			CCNJL	chr5	159678664	159739624	10.2994	1.82765	-2.4945	0.000821971	yes	OK
									ZFP2	chr5	178322915	178360409	3.20101	0.483291	-2.72757	0.000821971	yes	OK			IGF2,INS,INS-IGF2	chr11	2150341	2182439	1.39089	0.216233	-2.68535	0.000821971	yes	OK			ATP1B2	chr17	7554253	7561089	22.0843	3.90666	-2.49901	0.000821971	yes	OK
									HIF3A	chr19	46800302	46846724	17.073	2.56023	-2.73738	0.000821971	yes	OK			FAM116B	chr22	50750391	50765489	4.50061	0.696055	-2.69285	0.000821971	yes	OK			LOC729970	chr1	95392841	95428826	9.99409	1.76622	-2.50041	0.000821971	yes	OK
									VAX2	chr2	71127719	71160575	5.08085	0.758518	-2.74382	0.000821971	yes	OK			NME5	chr5	137450860	137475132	4.48296	0.692142	-2.69531	0.000821971	yes	OK			CADM3	chr1	159141376	159172932	1.93867	0.34114	-2.50663	0.000821971	yes	OK
									FRZB	chr2	183698004	183731498	1.46353	0.218044	-2.74676	0.000821971	yes	OK			SEMA3C	chr7	80371853	80548667	0.774053	0.118711	-2.70497	0.000821971	yes	OK			LOXL1	chr15	74208485	74244478	50.782	8.93588	-2.50664	0.000821971	yes	OK
									LOC728392	chr17	5402746	5404319	64.6817	9.60387	-2.75167	0.000821971	yes	OK			GJA5	chr1	147228331	147245484	2.64388	0.404003	-2.71022	0.000821971	yes	OK			TMEM35	chrX	100333835	100351355	4.96474	0.871987	-2.50934	0.000821971	yes	OK
									LOXL1	chr15	74208485	74244478	50.782	7.50436	-2.75852	0.000821971	yes	OK			CECR7	chr22	17517459	17551564	12.5136	1.89996	-2.71946	0.000821971	yes	OK			NKAIN1	chr1	31652133	31712779	24.559	4.30882	-2.51088	0.000821971	yes	OK
									BAI2	chr1	32192717	32229648	2.62066	0.386834	-2.76015	0.000821971	yes	OK			C17orf108	chr17	26205339	26220409	9.37787	1.41465	-2.72882	0.000821971	yes	OK			PTPRN2	chr7	157331749	158380482	5.34953	0.937967	-2.5118	0.000821971	yes	OK
									USHBP1	chr19	17360848	17375544	3.86428	0.569145	-2.76333	0.000821971	yes	OK			LOC349160	chr7	136468709	136849088	4.00695	0.599811	-2.73992	0.000821971	yes	OK			LPHN3	chr4	62066066	62938326	11.6157	2.0332	-2.51426	0.000821971	yes	OK
									NFASC	chr1	204797781	204991950	5.23543	0.767844	-2.76942	0.000821971	yes	OK			SLC22A17	chr14	23815331	23822080	31.1623	4.6569	-2.74236	0.000821971	yes	OK			ZEB1-AS1	chr10	31605456	31608024	2.68781	0.469773	-2.5164	0.000821971	yes	OK
									PTP4A3	chr8	142402155	142442554	113.876	16.6743	-2.77177	0.000821971	yes	OK			GPR56	chr16	57653909	57698944	3.26046	0.486605	-2.74426	0.000821971	yes	OK			THNSL2	chr2	88469813	88486287	13.0848	2.27956	-2.52107	0.000821971	yes	OK
									RBM24	chr6	17281808	17294099	6.05121	0.885075	-2.77335	0.000821971	yes	OK			C7orf60	chr7	112459201	112579932	3.71725	0.554739	-2.74435	0.000821971	yes	OK			EMP1	chr12	13349601	13369708	4.53692	0.789987	-2.52181	0.000821971	yes	OK
									FAM116B	chr22	50750391	50765489	4.50061	0.657291	-2.77552	0.000821971	yes	OK			CPS1	chr2	211342405	211543831	7.48559	1.11349	-2.74902	0.000821971	yes	OK			ADCY6,MIR4701	chr12	49159948	49182820	8.28289	1.43812	-2.52595	0.000821971	yes	OK
									PYGO1	chr15	55836381	55881050	1.67481	0.244181	-2.77797	0.000821971	yes	OK			FOS	chr14	75745480	75748937	186.47	27.5376	-2.75947	0.000821971	yes	OK			TMSB15A	chrX	101768609	101771699	178.585	30.9674	-2.52779	0.000821971	yes	OK
									ATP1B2	chr17	7554253	7561089	22.0843	3.21883	-2.77841	0.000821971	yes	OK			GAS1	chr9	89559276	89562104	14.9863	2.18106	-2.78054	0.000821971	yes	OK			ARMCX4	chrX	100673250	100790975	2.65882	0.460846	-2.52843	0.000821971	yes	OK
									CLGN	chr4	141308431	141348815	18.1742	2.63075	-2.78835	0.000821971	yes	OK			CADM3	chr1	159141376	159172932	1.93867	0.281889	-2.78187	0.000821971	yes	OK			RRAGD	chr6	90074334	90121995	6.65373	1.15135	-2.53083	0.000821971	yes	OK
									CRB2	chr9	126118447	126141032	7.45731	1.07574	-2.79333	0.000821971	yes	OK			SEMA5B	chr3	122628039	122747452	5.98736	0.86358	-2.79352	0.000821971	yes	OK			PMEL	chr12	56278763	56360496	264.062	45.5333	-2.53588	0.000821971	yes	OK
									C20orf112	chr20	31030861	31172875	14.7353	2.12171	-2.79597	0.000821971	yes	OK			SCD5	chr4	83550689	83720010	3.96938	0.569541	-2.80104	0.000821971	yes	OK			EFS	chr14	23825610	23834842	8.69893	1.49246	-2.54315	0.000821971	yes	OK
									ZEB1	chr10	31608100	31818742	4.9864	0.717314	-2.79732	0.000821971	yes	OK			PCBP4	chr3	51989329	52001482	109.833	15.7559	-2.80134	0.000821971	yes	OK			FIGN	chr2	164463699	164592513	2.6473	0.45417	-2.54322	0.000821971	yes	OK
									CD40	chr20	44746905	44758454	14.7519	2.12	-2.79876	0.000821971	yes	OK			TTLL7	chr1	84335056	84464833	1.56493	0.223635	-2.80688	0.000821971	yes	OK			DPYSL4	chr10	134000413	134019280	3.79095	0.647819	-2.5489	0.000821971	yes	OK
									NUCB2	chr11	17298285	17353382	36.0068	5.13847	-2.80886	0.000821971	yes	OK			CD82	chr11	44587140	44641858	39.2775	5.56633	-2.81891	0.000821971	yes	OK			MASP1	chr3	186933872	187009810	0.841782	0.142626	-2.56121	0.000821971	yes	OK
									GPR143	chrX	9693444	9734005	11.3629	1.61607	-2.81377	0.000821971	yes	OK			PDGFRB	chr5	149493401	149535422	2.03439	0.288158	-2.81966	0.000821971	yes	OK			ALS2CR8	chr2	203776977	203851060	1.78077	0.301348	-2.563	0.000821971	yes	OK
									GTF2A1L,STON1,STON1-GTF2A1L	chr2	48757063	49003656	2.00346	0.284421	-2.8164	0.000821971	yes	OK			AKR1C1,AKR1C3,AKR1C4	chr10	5005453	5260910	5.54577	0.782501	-2.82522	0.000821971	yes	OK			VSTM4	chr10	50222332	50323559	1.05089	0.176858	-2.57094	0.000821971	yes	OK
									TMEM169	chr2	216946588	216967566	8.10523	1.15055	-2.81653	0.000821971	yes	OK			RNF165	chr18	43914186	44040783	2.63957	0.371985	-2.82699	0.000821971	yes	OK			CDK14	chr7	90225674	90839904	4.09097	0.684102	-2.58016	0.000821971	yes	OK
									PLA2G3	chr22	31530775	31536469	16.0609	2.26916	-2.82332	0.000821971	yes	OK			ADA	chr20	43247753	43280376	114.057	16.0553	-2.82864	0.000821971	yes	OK			ZNF436	chr1	23685940	23698330	2.99537	0.500534	-2.58119	0.000821971	yes	OK
									C12orf53	chr12	6802955	6810009	8.99945	1.27103	-2.82383	0.000821971	yes	OK			C11orf70	chr11	101918168	101955291	9.54692	1.34316	-2.82941	0.000821971	yes	OK			OTOF	chr2	26680070	26781566	0.896399	0.14946	-2.58438	0.000821971	yes	OK
									CPXM1	chr20	2774600	2781311	308.668	43.4558	-2.82843	0.000821971	yes	OK			CLGN	chr4	141308431	141348815	18.1742	2.54667	-2.83521	0.000821971	yes	OK			RNF130	chr5	179382242	179499114	194.422	32.3652	-2.58667	0.000821971	yes	OK
									LINGO2	chr9	27948527	28719303	1.94704	0.273452	-2.83192	0.000821971	yes	OK			LHFP	chr13	39917028	40177356	12.263	1.70662	-2.84509	0.000821971	yes	OK			LRRN1	chr3	3841090	3890383	107.308	17.863	-2.58671	0.000821971	yes	OK
									CNRIP1	chr2	68511302	68547183	3.31093	0.464228	-2.83433	0.000821971	yes	OK			RGS22	chr8	100973275	101118344	2.3968	0.33334	-2.84604	0.000821971	yes	OK			BNIP3L	chr8	26240145	26270644	37.5281	6.23752	-2.58893	0.000821971	yes	OK
									TCTN1	chr12	111051831	111127617	18.6273	2.60474	-2.83821	0.000821971	yes	OK			HIF3A	chr19	46800302	46846724	17.073	2.37345	-2.84666	0.000821971	yes	OK			CPS1	chr2	211342405	211543831	7.48559	1.24311	-2.59016	0.000821971	yes	OK
									UBE2L6	chr11	57319127	57335803	97.4945	13.5822	-2.8436	0.000821971	yes	OK			ACCN2	chr12	50451376	50477395	5.77921	0.798816	-2.85494	0.000821971	yes	OK			SPOCK1	chr5	136310986	136835018	17.7725	2.94885	-2.59142	0.000821971	yes	OK
									TAGLN3	chr3	111717585	111732735	51.6143	7.18597	-2.84452	0.000821971	yes	OK			CLIP4	chr2	29338307	29406679	0.918339	0.126883	-2.85553	0.000821971	yes	OK			MORN4	chr10	99374307	99393913	14.6717	2.42843	-2.59495	0.000821971	yes	OK
									IDUA	chr4	972862	998394	8.92557	1.24251	-2.84469	0.000821971	yes	OK			LOC375190	chr2	24346349	24414567	14.8996	2.05809	-2.8559	0.000821971	yes	OK			HEY1	chr8	80676244	80680098	4.63681	0.766812	-2.59619	0.000821971	yes	OK
									TSPAN7	chrX	38420730	38548172	16.9206	2.34895	-2.84869	0.000821971	yes	OK			FGFR1	chr8	38268402	38326352	307.907	42.5004	-2.85695	0.000821971	yes	OK			DENND2A	chr7	140216387	140340571	19.306	3.19089	-2.59702	0.000821971	yes	OK
									CCDC36	chr3	49235860	49295537	1.40904	0.194681	-2.85553	0.000821971	yes	OK			LOC100506433	chr14	48151653	48264217	31.9534	4.38627	-2.86491	0.000821971	yes	OK			GNAZ	chr22	23401592	23484241	8.16518	1.34587	-2.60095	0.000821971	yes	OK
									WDR17	chr4	176986984	177103979	1.8513	0.255749	-2.85574	0.000821971	yes	OK			ZEB1	chr10	31608100	31818742	4.9864	0.677458	-2.87979	0.000821971	yes	OK			SATB1	chr3	18389132	18480265	1.09029	0.17964	-2.60153	0.000821971	yes	OK
									LOC729970	chr1	95392841	95428826	9.99409	1.38056	-2.85582	0.000821971	yes	OK			CPE	chr4	166300096	166419482	34.152	4.6384	-2.88027	0.000821971	yes	OK			COL4A5	chrX	107683073	107940775	11.3899	1.87352	-2.60394	0.000821971	yes	OK
									ARHGAP23	chr17	36584719	36668628	19.9872	2.74579	-2.86378	0.000821971	yes	OK			IFI27L2	chr14	94594117	94595957	123.451	16.7398	-2.88259	0.000821971	yes	OK			TMEM59L	chr19	18723681	18731849	16.8065	2.75713	-2.60778	0.000821971	yes	OK
									CYBRD1	chr2	172378865	172414643	1.51291	0.207644	-2.86514	0.000821971	yes	OK			EBF4	chr20	2673523	2740754	8.93083	1.20709	-2.88726	0.000821971	yes	OK			GFRA2	chr8	21549529	21646346	2.21613	0.363334	-2.60868	0.000821971	yes	OK
									GJA5	chr1	147228331	147245484	2.64388	0.362393	-2.86703	0.000821971	yes	OK			CLYBL	chr13	100258918	100552045	39.3335	5.31462	-2.88772	0.000821971	yes	OK			SNAP91	chr6	84262604	84419127	1.50293	0.246234	-2.60967	0.000821971	yes	OK
									GLDN	chr15	51633712	51700209	1.13111	0.155001	-2.86739	0.000821971	yes	OK			CHRNB2	chr1	154540256	154552353	2.03569	0.273451	-2.89616	0.000821971	yes	OK			DICER1-AS1	chr14	95624024	95646270	10.2372	1.67578	-2.61092	0.000821971	yes	OK
									C4orf34	chr4	39551937	39640672	41.1695	5.63186	-2.86989	0.000821971	yes	OK			PLXNC1	chr12	94542498	94701451	3.5935	0.482163	-2.8978	0.000821971	yes	OK			EPHB6	chr7	142552791	142568847	4.45029	0.728416	-2.61107	0.000821971	yes	OK
									NME5	chr5	137450860	137475132	4.48296	0.612552	-2.87155	0.000821971	yes	OK			FILIP1	chr6	76005530	76203496	9.93623	1.32858	-2.90281	0.000821971	yes	OK			LINGO1	chr15	77905354	77983244	74.0441	12.1191	-2.6111	0.000821971	yes	OK
									CLIP4	chr2	29338307	29406679	0.918339	0.124995	-2.87716	0.000821971	yes	OK			MAP1LC3C	chr1	242158791	242162385	4.20281	0.559908	-2.9081	0.000821971	yes	OK			SOBP	chr6	107811316	107982513	1.17615	0.192216	-2.61327	0.000821971	yes	OK
									NAALAD2	chr11	89867817	89925779	7.03874	0.957729	-2.87763	0.000821971	yes	OK			SEMA3A	chr7	83586191	83824416	15.9165	2.12037	-2.90813	0.000821971	yes	OK			PIK3R3	chr1	46505811	46598708	19.3711	3.15971	-2.61604	0.000821971	yes	OK
									HLA-B	chr6_qbl_hap6	2615164	2618505	11.6963	1.58981	-2.87913	0.000821971	yes	OK			EFNA5	chr5	106712589	107006596	5.10262	0.676613	-2.91484	0.000821971	yes	OK			MIAT	chr22	27053445	27072456	24.299	3.94984	-2.62103	0.000821971	yes	OK
									CPQ	chr8	97657498	98155722	4.58592	0.620051	-2.88675	0.000821971	yes	OK			HEY1	chr8	80676244	80680098	4.63681	0.610792	-2.92438	0.000821971	yes	OK			UBE2L6	chr11	57319127	57335803	97.4945	15.8338	-2.62232	0.000821971	yes	OK
									ARNT2	chr15	80696691	80890277	4.96322	0.671027	-2.88683	0.000821971	yes	OK			GTF2A1L,STON1,STON1-GTF2A1L	chr2	48757063	49003656	2.00346	0.263099	-2.92882	0.000821971	yes	OK			ESRRG	chr1	216676587	217311097	2.95718	0.478918	-2.62637	0.000821971	yes	OK
									FAM47E,FAM47E-STBD1,STBD1	chr4	77135192	77232315	9.54361	1.28299	-2.89502	0.000821971	yes	OK			ZNF436	chr1	23685940	23698330	2.99537	0.391624	-2.93519	0.000821971	yes	OK			ARHGEF17	chr11	73019300	73080425	10.391	1.68273	-2.62645	0.000821971	yes	OK
									CHRNB2	chr1	154540256	154552353	2.03569	0.272396	-2.90174	0.000821971	yes	OK			APOL2	chr22	36622254	36636000	5.04933	0.657418	-2.94121	0.000821971	yes	OK			FIGNL2	chr12	52211624	52242412	3.32219	0.537909	-2.6267	0.000821971	yes	OK
									LOC349160	chr7	136468709	136849088	4.00695	0.536071	-2.90201	0.000821971	yes	OK			RAMP2	chr17	40905931	40915102	82.2273	10.6734	-2.94559	0.000821971	yes	OK			HLA-B	chr6_qbl_hap6	2615164	2618505	11.6963	1.89178	-2.62824	0.000821971	yes	OK
									TMEM163	chr2	135213329	135476571	2.58661	0.345395	-2.90474	0.000821971	yes	OK			CXCR7	chr2	237478379	237490994	60.5086	7.81637	-2.95257	0.000821971	yes	OK			DMD	chrX	31137338	33357726	25.1758	4.05517	-2.6342	0.000821971	yes	OK
									CPNE5	chr6	36708554	36807220	1.28258	0.170928	-2.90759	0.000821971	yes	OK			ANKRD6	chr6	90142896	90348558	2.99783	0.385612	-2.9587	0.000821971	yes	OK			TMEM132B	chr12	125670949	126144501	7.80543	1.2517	-2.64058	0.000821971	yes	OK
									IFI27L2	chr14	94594117	94595957	123.451	16.3991	-2.91226	0.000821971	yes	OK			COL16A1	chr1	32117847	32169768	3.07856	0.395013	-2.96228	0.000821971	yes	OK			IGDCC3	chr15	65619462	65670398	144.082	23.0973	-2.64109	0.000821971	yes	OK
									SLC22A17	chr14	23815331	23822080	31.1623	4.12517	-2.91728	0.000821971	yes	OK			THPO	chr3	184089772	184095932	7.81516	0.999789	-2.96658	0.000821971	yes	OK			LOC100131564	chr1	93770943	93811368	9.88715	1.58357	-2.64237	0.000821971	yes	OK
									KLHDC8A	chr1	205305647	205326039	7.09526	0.93861	-2.91826	0.000821971	yes	OK			ZSWIM5	chr1	45482073	45672250	5.79807	0.741205	-2.96763	0.000821971	yes	OK			BCAT2	chr19	49298316	49314657	83.8017	13.3984	-2.64491	0.000821971	yes	OK
									CPS1	chr2	211342405	211543831	7.48559	0.990003	-2.91861	0.000821971	yes	OK			VSTM4	chr10	50222332	50323559	1.05089	0.134252	-2.96859	0.000821971	yes	OK			HEYL	chr1	40082036	40105348	5.2465	0.837617	-2.64699	0.000821971	yes	OK
									CD82	chr11	44587140	44641858	39.2775	5.18696	-2.92074	0.000821971	yes	OK			CCDC92	chr12	124247041	124457257	15.8976	2.02538	-2.97254	0.000821971	yes	OK			USHBP1	chr19	17360848	17375544	3.86428	0.615991	-2.64922	0.000821971	yes	OK
									LEPREL1	chr3	189674516	189840226	34.6061	4.5535	-2.92598	0.000821971	yes	OK			GLDN	chr15	51633712	51700209	1.13111	0.143314	-2.98049	0.000821971	yes	OK			SERPINF1	chr17	1665258	1680922	34.0826	5.43099	-2.64975	0.000821971	yes	OK
									TXNIP	chr1	145438461	145442628	267.819	35.1585	-2.92931	0.000821971	yes	OK			C12orf68	chr12	48577365	48579709	3.65075	0.460483	-2.98697	0.000821971	yes	OK			GRIK5	chr19	42502472	42574287	3.43524	0.545989	-2.65347	0.000821971	yes	OK
									PCDH18	chr4	138440037	138453685	63.7632	8.2675	-2.9472	0.000821971	yes	OK			KLHL4	chrX	86772714	86925050	1.58436	0.197032	-3.0074	0.000821971	yes	OK			WDR31	chr9	116077917	116102620	2.2065	0.348139	-2.66403	0.000821971	yes	OK
									SPOCK1	chr5	136310986	136835018	17.7725	2.3026	-2.94831	0.000821971	yes	OK			ARNT2	chr15	80696691	80890277	4.96322	0.615398	-3.01168	0.000821971	yes	OK			SERPING1	chr11	57365026	57382326	168.078	26.4222	-2.66931	0.000821971	yes	OK
									BMF	chr15	40380091	40401075	4.61118	0.596133	-2.95143	0.000821971	yes	OK			FRZB	chr2	183698004	183731498	1.46353	0.178975	-3.03162	0.000821971	yes	OK			OPTC	chr1	203463270	203478077	11.8734	1.86193	-2.67287	0.000821971	yes	OK
									ZNF853	chr7	6655245	6663921	6.72597	0.867874	-2.95418	0.000821971	yes	OK			LRRC17	chr7	102453307	102715288	2.60501	0.318103	-3.03372	0.000821971	yes	OK			ANK2	chr4	113739238	114304897	17.6288	2.75641	-2.67708	0.000821971	yes	OK
									CXCL6	chr4	74702272	74704477	1.90915	0.24598	-2.95632	0.000821971	yes	OK			C9orf4	chr9	111898690	111929571	3.23703	0.3936	-3.03987	0.000821971	yes	OK			NRIP1	chr21	16333480	16437314	8.51957	1.3268	-2.68283	0.000821971	yes	OK
									ZBTB16	chr11	113930430	114121397	10.2516	1.31833	-2.95906	0.000821971	yes	OK			CADM4	chr19	44126521	44143991	12.6431	1.53209	-3.04478	0.000821971	yes	OK			SAMD10	chr20	62605465	62610995	4.17308	0.649519	-2.68367	0.000821971	yes	OK
									MST1R	chr3	49924435	49941306	3.66445	0.468901	-2.96624	0.000821971	yes	OK			PRAME	chr22	22890122	22901696	3.63225	0.438073	-3.05162	0.000821971	yes	OK			C16orf45	chr16	15528324	15682116	24.3206	3.77484	-2.68769	0.000821971	yes	OK
									MFNG	chr22	37865100	37882478	6.93327	0.882501	-2.97387	0.000821971	yes	OK			GPM6A	chr4	176554087	176923648	2.11725	0.254587	-3.05596	0.000821971	yes	OK			FBXO4	chr5	41925355	41941732	10.2199	1.58609	-2.68784	0.000821971	yes	OK
									SLC2A10	chr20	45338278	45364985	8.80522	1.11669	-2.97914	0.000821971	yes	OK			BMF	chr15	40380091	40401075	4.61118	0.54684	-3.07595	0.000821971	yes	OK			FBN1	chr15	48700502	48937985	3.24139	0.502941	-2.68815	0.000821971	yes	OK
									AKR1C1,AKR1C3,AKR1C4	chr10	5005453	5260910	5.54577	0.701718	-2.98242	0.000821971	yes	OK			TIE1	chr1	43766565	43788781	4.86564	0.569341	-3.09527	0.000821971	yes	OK			CPAMD8	chr19	17003761	17137625	2.51541	0.390283	-2.6882	0.000821971	yes	OK
									CDH10	chr5	24487208	24645085	2.96228	0.372091	-2.99298	0.000821971	yes	OK			PRKD1	chr14	29896116	30396899	3.24145	0.376004	-3.10782	0.000821971	yes	OK			SYP	chrX	49044264	49056661	3.33626	0.5173	-2.68916	0.000821971	yes	OK
									ACSS1	chr20	24986865	25038818	7.02171	0.881795	-2.99331	0.000821971	yes	OK			FST	chr5	52776076	52783020	137.593	15.8827	-3.11488	0.000821971	yes	OK			CCDC144NL	chr17	20766707	20833420	22.8008	3.53277	-2.69022	0.000821971	yes	OK
									TBC1D9	chr4	141541935	141677471	1.80266	0.226019	-2.99562	0.000821971	yes	OK			PRKCB	chr16	23847299	24231932	7.08702	0.815831	-3.11884	0.000821971	yes	OK			ZNF25	chr10	38238794	38265453	1.25242	0.192373	-2.70274	0.000821971	yes	OK
									HEYL	chr1	40082036	40105348	5.2465	0.657312	-2.9967	0.000821971	yes	OK			PGAM2	chr7	44101956	44105186	64.5237	7.4088	-3.12252	0.000821971	yes	OK			LOC100507032	chr3	129612713	129627755	1.27416	0.195223	-2.70635	0.000821971	yes	OK
									PMEL	chr12	56278763	56360496	264.062	32.986	-3.00095	0.000821971	yes	OK			MIR17,MIR17HG,MIR18A,MIR19A,MIR19B1,MIR20A,MIR92A1	chr13	92000073	92006922	26.8703	3.08219	-3.12398	0.000821971	yes	OK			GAS1	chr9	89559276	89562104	14.9863	2.29307	-2.70829	0.000821971	yes	OK
									MASP1	chr3	186933872	187009810	0.841782	0.104417	-3.0111	0.000821971	yes	OK			ACCS	chr11	44087728	44105730	5.46753	0.621223	-3.1377	0.000821971	yes	OK			CTTNBP2	chr7	117350705	117513561	1.14499	0.174774	-2.71178	0.000821971	yes	OK
									XKR5	chr8	6666040	6699975	1.72678	0.213852	-3.0134	0.000821971	yes	OK			ACRBP	chr12	6747241	6756580	5.95987	0.674824	-3.1427	0.000821971	yes	OK			BEND5	chr1	48988352	50489626	11.4869	1.75048	-2.71417	0.000821971	yes	OK
									BTBD19	chr1	45274153	45279825	4.9038	0.606203	-3.01603	0.000821971	yes	OK			MRC2	chr17	60704761	60770962	42.4566	4.64756	-3.19144	0.000821971	yes	OK			ZFP2	chr5	178322915	178360409	3.20101	0.484738	-2.72325	0.000821971	yes	OK
									NCALD	chr8	102698769	103137135	3.83743	0.473024	-3.02016	0.000821971	yes	OK			DCLK2	chr4	150999425	151178608	0.923919	0.100224	-3.20454	0.000821971	yes	OK			NDNF	chr4	121956781	121993673	1.72573	0.260772	-2.72634	0.000821971	yes	OK
									ADSSL1	chr14	105190533	105213647	4.61865	0.569164	-3.02056	0.000821971	yes	OK			NGEF	chr2	233743395	233877951	23.0405	2.4831	-3.21395	0.000821971	yes	OK			ELOVL2	chr6	10980992	11079377	1.30762	0.197271	-2.7287	0.000821971	yes	OK
									MBNL2	chr13	97874573	98046374	1.65112	0.202577	-3.0269	0.000821971	yes	OK			C3orf70	chr3	184795837	184870802	1.02214	0.109077	-3.22817	0.000821971	yes	OK			CALCOCO1	chr12	54104896	54121307	30.9687	4.65602	-2.73364	0.000821971	yes	OK
									SCD5	chr4	83550689	83720010	3.96938	0.486491	-3.02843	0.000821971	yes	OK			NRG3	chr10	83635069	84746935	2.07772	0.221421	-3.23013	0.000821971	yes	OK			ANXA9	chr1	150954498	150968114	3.9499	0.592092	-2.73792	0.000821971	yes	OK
									MRC2	chr17	60704761	60770962	42.4566	5.14108	-3.04584	0.000821971	yes	OK			LOXL4	chr10	100007442	100028007	2.93684	0.312768	-3.2311	0.000821971	yes	OK			TMEM8B	chr9	35829221	35855330	11.4201	1.70754	-2.74158	0.000821971	yes	OK
									VSTM4	chr10	50222332	50323559	1.05089	0.127017	-3.04852	0.000821971	yes	OK			HEYL	chr1	40082036	40105348	5.2465	0.556154	-3.2378	0.000821971	yes	OK			STC1	chr8	23699433	23712320	1.70335	0.254561	-2.74229	0.000821971	yes	OK
									ADAM32	chr8	38965049	39142436	1.19123	0.143276	-3.05559	0.000821971	yes	OK			EMILIN1	chr2	27301434	27309265	21.9378	2.32492	-3.23816	0.000821971	yes	OK			DNAJC12	chr10	69556426	69597937	6.62285	0.989086	-2.74329	0.000821971	yes	OK
									NGFR	chr17	47572654	47592382	38.6419	4.58214	-3.07607	0.000821971	yes	OK			FOSB	chr19	45971252	45978437	2.82882	0.299421	-3.23995	0.000821971	yes	OK			MAP1LC3C	chr1	242158791	242162385	4.20281	0.625103	-2.74919	0.000821971	yes	OK
									MUM1L1	chrX	105412297	105452949	4.91196	0.582337	-3.07637	0.000821971	yes	OK			CD4	chr12	6898637	6929976	4.55722	0.477698	-3.25398	0.000821971	yes	OK			ARHGEF10L	chr1	17866264	18024370	11.3141	1.6816	-2.75022	0.000821971	yes	OK
									SULT1C4	chr2	108994400	109005433	5.6553	0.669958	-3.07746	0.000821971	yes	OK			TM4SF1	chr3	149086804	149095568	9.03239	0.936004	-3.27052	0.000821971	yes	OK			TM4SF1	chr3	149086804	149095568	9.03239	1.33958	-2.75333	0.000821971	yes	OK
									SFRP1	chr8	41119475	41166991	232.509	27.2951	-3.09057	0.000821971	yes	OK			CADM1	chr11	115044344	115375241	25.8962	2.65286	-3.28712	0.000821971	yes	OK			KLHL4	chrX	86772714	86925050	1.58436	0.234387	-2.75694	0.000821971	yes	OK
									GTSF1	chr12	54849735	54867386	24.6899	2.89288	-3.09334	0.000821971	yes	OK			TBC1D9	chr4	141541935	141677471	1.80266	0.182734	-3.30231	0.000821971	yes	OK			TBL1X	chrX	9431334	9687780	9.49363	1.3995	-2.76204	0.000821971	yes	OK
									SEMA5B	chr3	122628039	122747452	5.98736	0.700483	-3.0955	0.000821971	yes	OK			SSBP2	chr5	80256162	81047072	39.6891	4.02263	-3.30253	0.000821971	yes	OK			MSRB3	chr12	65672422	65860687	3.58511	0.525144	-2.77123	0.000821971	yes	OK
									ANPEP	chr15	90328125	90358072	2.29622	0.267363	-3.10239	0.000821971	yes	OK			TOX3	chr16	52471814	52581714	27.9048	2.82718	-3.30308	0.000821971	yes	OK			TMEM155	chr4	122680084	122687963	4.54023	0.663761	-2.77403	0.000821971	yes	OK
									ALS2CR8	chr2	203776977	203851060	1.78077	0.206956	-3.1051	0.000821971	yes	OK			ZBTB20	chr3	114056946	114866127	1.70662	0.171663	-3.31349	0.000821971	yes	OK			UBE2J1	chr6	90035447	90062844	13.5122	1.96997	-2.77801	0.000821971	yes	OK
									RIN1	chr11	66099541	66104000	7.88065	0.914956	-3.10654	0.000821971	yes	OK			PLA2G4C	chr19	48551099	48614109	1.02044	0.102382	-3.31716	0.000821971	yes	OK			TIE1	chr1	43766565	43788781	4.86564	0.703802	-2.78939	0.000821971	yes	OK
									C2orf55	chr2	99410308	99552684	1.43886	0.165917	-3.11639	0.000821971	yes	OK			LOC728392	chr17	5402746	5404319	64.6817	6.35079	-3.34835	0.000821971	yes	OK			NAB1	chr2	191513669	191557495	4.69018	0.676077	-2.79438	0.000821971	yes	OK
									HOMER3	chr19	19039930	19052041	60.9964	6.97736	-3.12797	0.000821971	yes	OK			BAHCC1	chr17	79373254	79433358	9.56574	0.928837	-3.36438	0.000821971	yes	OK			TMEM170B	chr6	11538510	11583757	2.51852	0.361197	-2.80172	0.000821971	yes	OK
									CADM3	chr1	159141376	159172932	1.93867	0.221272	-3.13117	0.000821971	yes	OK			NLGN3	chrX	70364680	70391051	12.1554	1.17649	-3.36904	0.000821971	yes	OK			AGPAT3	chr21	45285115	45407475	4.12296	0.590311	-2.80413	0.000821971	yes	OK
									PLEKHB1	chr11	73357222	73373864	32.9502	3.67987	-3.16256	0.000821971	yes	OK			PTPRO	chr12	15475190	15751265	1.0631	0.102696	-3.37182	0.000821971	yes	OK			PCBP4	chr3	51989329	52001482	109.833	15.608	-2.81495	0.000821971	yes	OK
									GFRA2	chr8	21549529	21646346	2.21613	0.247061	-3.16511	0.000821971	yes	OK			CORO2B	chr15	68871307	69020144	2.68055	0.258392	-3.3749	0.000821971	yes	OK			SLC5A12	chr11	26688565	26988963	3.25544	0.462472	-2.81541	0.000821971	yes	OK
									CRABP1	chr15	78632665	78640572	790.233	87.9225	-3.16797	0.000821971	yes	OK			MAPRE3	chr2	27193502	27250087	17.2564	1.66338	-3.37494	0.000821971	yes	OK			ANKRD6	chr6	90142896	90348558	2.99783	0.423901	-2.82212	0.000821971	yes	OK
									ASPG	chr14	104552022	104579046	3.06789	0.340266	-3.17251	0.000821971	yes	OK			NCAM1	chr11	112831252	113149158	3.05996	0.294091	-3.37918	0.000821971	yes	OK			C3orf70	chr3	184795837	184870802	1.02214	0.144262	-2.82483	0.000821971	yes	OK
									PTPRO	chr12	15475190	15751265	1.0631	0.117594	-3.17639	0.000821971	yes	OK			CACNG6	chr19	54495541	54515920	4.21546	0.40442	-3.38176	0.000821971	yes	OK			RHPN1	chr8	144451024	144466390	14.7582	2.07755	-2.82856	0.000821971	yes	OK
									COL22A1	chr8	139600477	139926236	0.953988	0.104942	-3.18438	0.000821971	yes	OK			LOC441204	chr7	26443107	26535986	2.18006	0.208604	-3.38553	0.000821971	yes	OK			RTN1	chr14	60062693	60337557	14.9816	2.09268	-2.83977	0.000821971	yes	OK
									NLGN3	chrX	70364680	70391051	12.1554	1.32852	-3.1937	0.000821971	yes	OK			MUM1L1	chrX	105412297	105452949	4.91196	0.467771	-3.39243	0.000821971	yes	OK			CCDC136	chr7	128431463	128462187	6.14481	0.857875	-2.84053	0.000821971	yes	OK
									ACCN2	chr12	50451376	50477395	5.77921	0.626627	-3.20519	0.000821971	yes	OK			BLCAP	chr20	36145818	36171617	1417.67	134.411	-3.3988	0.000821971	yes	OK			BAHCC1	chr17	79373254	79433358	9.56574	1.33336	-2.84281	0.000821971	yes	OK
									CPE	chr4	166300096	166419482	34.152	3.65761	-3.223	0.000821971	yes	OK			TTYH1	chr19	54926604	54948169	1121.87	106.36	-3.39888	0.000821971	yes	OK			CYTL1	chr4	5015871	5021197	9.76841	1.35267	-2.85232	0.000821971	yes	OK
									DUSP2	chr2	96808907	96811179	8.78402	0.940307	-3.22368	0.000821971	yes	OK			ZNF521	chr18	22641887	22932214	7.58177	0.71562	-3.40527	0.000821971	yes	OK			PRAME	chr22	22890122	22901696	3.63225	0.499776	-2.86151	0.000821971	yes	OK
									EGFEM1P	chr3	167967309	168548374	1.45695	0.155424	-3.22866	0.000821971	yes	OK			TMEM169	chr2	216946588	216967566	8.10523	0.764388	-3.40648	0.000821971	yes	OK			ACCN2	chr12	50451376	50477395	5.77921	0.788172	-2.87429	0.000821971	yes	OK
									LTBP2	chr14	74964885	75079034	1.58	0.167619	-3.23666	0.000821971	yes	OK			ASTN1	chr1	176830202	177134024	4.40467	0.407495	-3.43418	0.000821971	yes	OK			RASSF4	chr10	45455218	45491732	32.8139	4.42886	-2.8893	0.000821971	yes	OK
									CXCR7	chr2	237478379	237490994	60.5086	6.37079	-3.2476	0.000821971	yes	OK			ELTD1	chr1	79355448	79472495	0.670556	0.0619031	-3.43727	0.000821971	yes	OK			SCD5	chr4	83550689	83720010	3.96938	0.533389	-2.89566	0.000821971	yes	OK
									LGALS3BP	chr17	76967334	76976061	65.2527	6.78676	-3.26524	0.000821971	yes	OK			FEZ1	chr11	125307120	125366206	81.787	7.52085	-3.4429	0.000821971	yes	OK			FLJ31485	chr12	130636077	130646845	2.80159	0.372138	-2.91234	0.000821971	yes	OK
									NDNF	chr4	121956781	121993673	1.72573	0.178183	-3.27577	0.000821971	yes	OK			LOC400043	chr12	54519854	54526626	9.16891	0.828979	-3.46734	0.000821971	yes	OK			FGFR1	chr8	38268402	38326352	307.907	40.8733	-2.91326	0.000821971	yes	OK
									CADM4	chr19	44126521	44143991	12.6431	1.30009	-3.28167	0.000821971	yes	OK			SULT1C4	chr2	108994400	109005433	5.6553	0.507404	-3.4784	0.000821971	yes	OK			EML1	chr14	100259744	100408395	18.1947	2.41521	-2.9133	0.000821971	yes	OK
									IGF2,INS,INS-IGF2	chr11	2150341	2182439	1.39089	0.141695	-3.29514	0.000821971	yes	OK			OPTC	chr1	203463270	203478077	11.8734	1.05741	-3.48913	0.000821971	yes	OK			CRNDE	chr16	54952664	54963079	21.8477	2.89866	-2.91403	0.000821971	yes	OK
									CPAMD8	chr19	17003761	17137625	2.51541	0.251434	-3.32254	0.000821971	yes	OK			CRABP1	chr15	78632665	78640572	790.233	70.2961	-3.49076	0.000821971	yes	OK			CXCL6	chr4	74702272	74704477	1.90915	0.252704	-2.91741	0.000821971	yes	OK
									SNX32	chr11	65601409	65621172	11.1345	1.10902	-3.32768	0.000821971	yes	OK			NECAB2	chr16	84002236	84036382	9.08637	0.799338	-3.50683	0.000821971	yes	OK			ENPEP	chr4	111397228	111484493	1.7336	0.227995	-2.9267	0.000821971	yes	OK
									PLEKHG4	chr16	67311309	67360661	25.5375	2.54159	-3.32881	0.000821971	yes	OK			CXXC4	chr4	105389445	105416083	5.68359	0.497255	-3.51475	0.000821971	yes	OK			HFM1	chr1	91726319	91870426	5.57048	0.730029	-2.93178	0.000821971	yes	OK
									ARC	chr8	143692406	143695833	78.6396	7.82012	-3.32999	0.000821971	yes	OK			DIO3	chr14	102027687	102029789	10.4626	0.909474	-3.52406	0.000821971	yes	OK			PLEKHG4	chr16	67311309	67360661	25.5375	3.34677	-2.93178	0.000821971	yes	OK
									GPR162	chr12	6930962	6936586	13.947	1.37737	-3.33997	0.000821971	yes	OK			NNAT	chr20	36145818	36171617	1306.87	112.045	-3.54396	0.000821971	yes	OK			EMILIN1	chr2	27301434	27309265	21.9378	2.87279	-2.93289	0.000821971	yes	OK
									PTN	chr7	136911805	137028546	96.8677	9.55647	-3.34147	0.000821971	yes	OK			CNRIP1	chr2	68511302	68547183	3.31093	0.282745	-3.54966	0.000821971	yes	OK			COL16A1	chr1	32117847	32169768	3.07856	0.395612	-2.9601	0.000821971	yes	OK
									PGAM2	chr7	44101956	44105186	64.5237	6.33914	-3.34747	0.000821971	yes	OK			NCALD	chr8	102698769	103137135	3.83743	0.312553	-3.61797	0.000821971	yes	OK			C17orf108	chr17	26205339	26220409	9.37787	1.20357	-2.96194	0.000821971	yes	OK
									NOS3	chr7	150688143	150721586	31.1136	3.05468	-3.34845	0.000821971	yes	OK			KLHDC8A	chr1	205305647	205326039	7.09526	0.576223	-3.62216	0.000821971	yes	OK			WFIKKN1	chr16	681011	684116	89.936	11.5188	-2.96491	0.000821971	yes	OK
									PNCK	chrX	152935187	152952155	18.7435	1.83984	-3.34874	0.000821971	yes	OK			IFI6	chr1	27992571	27998724	72.7643	5.77887	-3.65437	0.000821971	yes	OK			AKD1	chr6	109814058	110012415	1.784	0.228207	-2.9667	0.000821971	yes	OK
									PKNOX2	chr11	125034558	125303285	4.72216	0.462528	-3.35183	0.000821971	yes	OK			MOB3C	chr1	47073386	47082563	5.44076	0.422007	-3.68847	0.000821971	yes	OK			JAM2	chr21	27011588	27087857	3.18283	0.404837	-2.9749	0.000821971	yes	OK
									LOC375190	chr2	24346349	24414567	14.8996	1.45767	-3.35354	0.000821971	yes	OK			RBM24	chr6	17281808	17294099	6.05121	0.466393	-3.69761	0.000821971	yes	OK			ZBTB20	chr3	114056946	114866127	1.70662	0.217029	-2.97518	0.000821971	yes	OK
									WFIKKN1	chr16	681011	684116	89.936	8.70978	-3.36819	0.000821971	yes	OK			SDK2	chr17	71330515	71642357	15.5276	1.1856	-3.71114	0.000821971	yes	OK			CCDC92	chr12	124247041	124457257	15.8976	2.02011	-2.9763	0.000821971	yes	OK
									CLYBL	chr13	100258918	100552045	39.3335	3.7892	-3.37579	0.000821971	yes	OK			DAPK2	chr15	64199234	64338521	2.13119	0.162128	-3.71646	0.000821971	yes	OK			COL9A1	chr6	70925742	71012786	4.9815	0.632978	-2.97635	0.000821971	yes	OK
									PRTG	chr15	55903736	56035314	37.1437	3.55766	-3.38412	0.000821971	yes	OK			FGFBP3	chr10	93654586	93669426	339.29	25.5388	-3.73175	0.000821971	yes	OK			ZNF853	chr7	6655245	6663921	6.72597	0.852225	-2.98044	0.000821971	yes	OK
									HES1	chr3	193853930	193856401	14.9312	1.40653	-3.40811	0.000821971	yes	OK			COL2A1	chr12	48366745	48398285	33.3805	2.44294	-3.77231	0.000821971	yes	OK			RCAN2	chr6	46188466	46459804	3.607	0.456549	-2.98196	0.000821971	yes	OK
									MIR17,MIR17HG,MIR18A,MIR19A,MIR19B1,MIR20A,MIR92A1	chr13	92000073	92006922	26.8703	2.51447	-3.41769	0.000821971	yes	OK			SFRP1	chr8	41119475	41166991	232.509	16.7684	-3.79346	0.000821971	yes	OK			GNG2	chr14	52327021	52436518	19.5099	2.45684	-2.98933	0.000821971	yes	OK
									AXL	chr19	41725107	41767671	4.45229	0.416517	-3.4181	0.000821971	yes	OK			IGDCC4	chr15	65673712	65715410	13.5224	0.963816	-3.81045	0.000821971	yes	OK			LOC100506433	chr14	48151653	48264217	31.9534	4.02076	-2.99043	0.000821971	yes	OK
									ACCS	chr11	44087728	44105730	5.46753	0.505853	-3.4341	0.000821971	yes	OK			MXRA8	chr1	1288063	1293915	241.611	17.0961	-3.82095	0.000821971	yes	OK			FGL1	chr8	17721531	17767877	6.71557	0.844847	-2.99075	0.000821971	yes	OK
									IFI6	chr1	27992571	27998724	72.7643	6.70336	-3.44027	0.000821971	yes	OK			EGR2	chr10	64571753	64578927	3.53285	0.248062	-3.83206	0.000821971	yes	OK			FST	chr5	52776076	52783020	137.593	17.1247	-3.00625	0.000821971	yes	OK
									ABCC6	chr16	16243421	16317328	4.11633	0.378778	-3.44193	0.000821971	yes	OK			MIR3605,PHC2	chr1	33774372	33841194	79.6389	5.58172	-3.83469	0.000821971	yes	OK			LHFP	chr13	39917028	40177356	12.263	1.526	-3.00648	0.000821971	yes	OK
									S100A4	chr1	153516087	153518282	2516.04	231.357	-3.44296	0.000821971	yes	OK			EFNB1	chrX	68048839	68062006	85.3512	5.97305	-3.83687	0.000821971	yes	OK			RNF157	chr17	74132414	74236564	9.91465	1.23128	-3.00941	0.000821971	yes	OK
									ASB9	chrX	15262042	15288589	2.05593	0.188172	-3.44967	0.000821971	yes	OK			SERPINA5	chr14	95047714	95059457	11.0633	0.773013	-3.83914	0.000821971	yes	OK			C4orf34	chr4	39551937	39640672	41.1695	5.11113	-3.00986	0.000821971	yes	OK
									PTPRZ1	chr7	121512976	121702096	64.1388	5.86858	-3.45011	0.000821971	yes	OK			HSD17B14	chr19	49316271	49340044	16.4895	1.14927	-3.84276	0.000821971	yes	OK			ZDHHC1	chr16	67428321	67450403	15.6833	1.91906	-3.03076	0.000821971	yes	OK
									ECM1	chr1	150480486	150486267	11.9213	1.07432	-3.47204	0.000821971	yes	OK			MFNG	chr22	37865100	37882478	6.93327	0.476351	-3.86344	0.000821971	yes	OK			PRKCE	chr2	45879042	46415129	1.14901	0.140286	-3.03395	0.000821971	yes	OK
									MFAP5	chr12	8798530	8815433	3.19047	0.2848	-3.48575	0.000821971	yes	OK			PLEKHB1	chr11	73357222	73373864	32.9502	2.23908	-3.87931	0.000821971	yes	OK			AEBP1,MIR4649	chr7	44143949	44163150	132.119	16.1249	-3.03447	0.000821971	yes	OK
									LOC100131289	chr6	27729522	27730966	7.13682	0.636894	-3.48616	0.000821971	yes	OK			HTR1D	chr1	23516695	23533674	2.42106	0.163418	-3.889	0.000821971	yes	OK			HIF3A	chr19	46800302	46846724	17.073	2.07165	-3.04287	0.000821971	yes	OK
									MXRA8	chr1	1288063	1293915	241.611	21.5591	-3.48632	0.000821971	yes	OK			SDSL	chr12	113860215	113876149	6.81502	0.459353	-3.89104	0.000821971	yes	OK			WDR17	chr4	176986984	177103979	1.8513	0.224156	-3.04597	0.000821971	yes	OK
									NCAM2	chr21	22370632	22912517	6.41386	0.572184	-3.48664	0.000821971	yes	OK			TINAGL1	chr1	32042085	32053287	37.5841	2.52873	-3.89364	0.000821971	yes	OK			OR2L13	chr1	248100492	248264224	1.87917	0.226377	-3.0533	0.000821971	yes	OK
									IGDCC4	chr15	65673712	65715410	13.5224	1.20273	-3.49097	0.000821971	yes	OK			F10	chr13	113777112	113803892	32.4534	2.15172	-3.91481	0.000821971	yes	OK			SPSB4	chr3	140770742	140867453	11.9794	1.42345	-3.07309	0.000821971	yes	OK
									NKAIN2	chr6	124125068	125146786	0.937429	0.0832805	-3.49266	0.000821971	yes	OK			PCDH18	chr4	138440037	138453685	63.7632	4.04307	-3.9792	0.000821971	yes	OK			ATP8A1	chr4	42410391	42659122	1.52322	0.180845	-3.0743	0.000821971	yes	OK
									GREB1L	chr18	18822202	19105734	34.4167	3.04062	-3.50067	0.000821971	yes	OK			LGALS3BP	chr17	76967334	76976061	65.2527	4.11696	-3.98639	0.000821971	yes	OK			TSPAN7	chrX	38420730	38548172	16.9206	2.00507	-3.07705	0.000821971	yes	OK
									LRRN2	chr1	204586234	204654789	22.1148	1.942	-3.5094	0.000821971	yes	OK			SOX21	chr13	95361820	95369086	19.5419	1.23012	-3.9897	0.000821971	yes	OK			FXYD2,FXYD6,FXYD6-FXYD2	chr11	117690789	117748201	59.2524	6.99641	-3.08219	0.000821971	yes	OK
									CA11	chr19	49141271	49185502	10.7637	0.938533	-3.51962	0.000821971	yes	OK			C10orf118,MIR2110	chr10	115881028	115934364	58.6217	3.67454	-3.9958	0.000821971	yes	OK			KHDRBS2	chr6	62389864	62996122	2.78823	0.329054	-3.08295	0.000821971	yes	OK
									THPO	chr3	184089772	184095932	7.81516	0.673056	-3.53748	0.000821971	yes	OK			SOX5	chr12	23683907	24715380	0.988528	0.0602232	-4.03689	0.000821971	yes	OK			C5orf4	chr5	154198051	154230213	3.56162	0.419398	-3.08615	0.000821971	yes	OK
									ZBTB20	chr3	114056946	114866127	1.70662	0.146536	-3.54182	0.000821971	yes	OK			HES3	chr1	6304174	6306676	34.5854	2.08786	-4.05007	0.000821971	yes	OK			CLIP4	chr2	29338307	29406679	0.918339	0.107257	-3.09795	0.000821971	yes	OK
									CHRD	chr3	184097860	184107617	7.7484	0.663343	-3.54607	0.000821971	yes	OK			MIR4687,STIM1	chr11	3876932	4114440	69.4135	4.09351	-4.08381	0.000821971	yes	OK			XKR5	chr8	6666040	6699975	1.72678	0.201331	-3.10044	0.000821971	yes	OK
									IGFBP6	chr12	53491435	53496128	39.8871	3.34042	-3.57782	0.000821971	yes	OK			GDPD2	chrX	69642880	69653368	12.1693	0.700838	-4.11803	0.000821971	yes	OK			NGEF	chr2	233743395	233877951	23.0405	2.68618	-3.10054	0.000821971	yes	OK
									C17orf108	chr17	26205339	26220409	9.37787	0.784638	-3.57916	0.000821971	yes	OK			LAMP5	chr20	9495004	9511171	4.75111	0.269498	-4.13992	0.000821971	yes	OK			PLXNC1	chr12	94542498	94701451	3.5935	0.418772	-3.10115	0.000821971	yes	OK
									C1QTNF6	chr22	37576205	37584330	8.68749	0.724956	-3.58297	0.000821971	yes	OK			TSPAN19	chr12	85408093	85430055	3.06998	0.168186	-4.1901	0.000821971	yes	OK			PPP1R1A	chr12	54943176	54982443	21.4213	2.48269	-3.10907	0.000821971	yes	OK
									CX3CL1	chr16	57406413	57418956	4.85913	0.403182	-3.5912	0.000821971	yes	OK			TPPP3	chr16	67423711	67427421	53.2638	2.90614	-4.19598	0.000821971	yes	OK			COL11A1	chr1	103342022	103574080	5.59601	0.643986	-3.1193	0.000821971	yes	OK
									ACTA2,FAS-AS1	chr10	90694830	90775542	11.5737	0.960167	-3.59142	0.000821971	yes	OK			CNTFR	chr9	34551429	34590138	45.6475	2.48308	-4.20034	0.000821971	yes	OK			CPXM1	chr20	2774600	2781311	308.668	35.485	-3.12077	0.000821971	yes	OK
									CD248	chr11	66081957	66084515	19.2958	1.59236	-3.59905	0.000821971	yes	OK			TFAP2B	chr6	50786438	50815326	1.74518	0.0922536	-4.24163	0.000821971	yes	OK			SEMA3A	chr7	83586191	83824416	15.9165	1.82824	-3.122	0.000821971	yes	OK
									EBF4	chr20	2673523	2740754	8.93083	0.729806	-3.61321	0.000821971	yes	OK			GPR162	chr12	6930962	6936586	13.947	0.710407	-4.29517	0.000821971	yes	OK			DIO3	chr14	102027687	102029789	10.4626	1.19476	-3.13044	0.000821971	yes	OK
									FZD2	chr17	42634811	42638630	73.6729	5.98813	-3.62096	0.000821971	yes	OK			PKNOX2	chr11	125034558	125303285	4.72216	0.234054	-4.33454	0.000821971	yes	OK			SLC22A17	chr14	23815331	23822080	31.1623	3.53594	-3.13964	0.000821971	yes	OK
									C5orf4	chr5	154198051	154230213	3.56162	0.289372	-3.62154	0.000821971	yes	OK			LY6H	chr8	144239330	144242053	13.1457	0.64954	-4.33903	0.000821971	yes	OK			SLC27A2	chr15	50474392	50528589	2.60739	0.295443	-3.14166	0.000821971	yes	OK
									LOC339535	chr1	238643683	238649317	7.14247	0.577055	-3.62964	0.000821971	yes	OK			EGFEM1P	chr3	167967309	168548374	1.45695	0.0719311	-4.34019	0.000821971	yes	OK			EFNA5	chr5	106712589	107006596	5.10262	0.572047	-3.15703	0.000821971	yes	OK
									TFAP2B	chr6	50786438	50815326	1.74518	0.139011	-3.65011	0.000821971	yes	OK			C3orf15	chr3	119421868	119485949	1.00095	0.0454764	-4.46011	0.000821971	yes	OK			MXRA8	chr1	1288063	1293915	241.611	26.9194	-3.16597	0.000821971	yes	OK
									C3orf15	chr3	119421868	119485949	1.00095	0.079341	-3.65716	0.000821971	yes	OK			ATP1A2	chr1	160085519	160113374	17.5802	0.798588	-4.46035	0.000821971	yes	OK			EMID1	chr22	29601829	29655587	42.4489	4.70817	-3.17249	0.000821971	yes	OK
									ACRBP	chr12	6747241	6756580	5.95987	0.46203	-3.68922	0.000821971	yes	OK			BST2	chr19	17513754	17516384	119.865	5.40425	-4.47117	0.000821971	yes	OK			EBF4	chr20	2673523	2740754	8.93083	0.989811	-3.17357	0.000821971	yes	OK
									BLCAP	chr20	36145818	36171617	1417.67	109.129	-3.69942	0.000821971	yes	OK			DPYSL5	chr2	27070968	27173220	31.18	1.37727	-4.50074	0.000821971	yes	OK			NCAM2	chr21	22370632	22912517	6.41386	0.710102	-3.1751	0.000821971	yes	OK
									FAM65B	chr6	24804512	24911195	1.99835	0.151354	-3.72281	0.000821971	yes	OK			EMP1	chr12	13349601	13369708	4.53692	0.196056	-4.53238	0.000821971	yes	OK			PGAM2	chr7	44101956	44105186	64.5237	7.10634	-3.18265	0.000821971	yes	OK
									DAPK2	chr15	64199234	64338521	2.13119	0.160716	-3.72907	0.000821971	yes	OK			EGR1	chr5	137800933	137815373	57.2681	2.44692	-4.54869	0.000821971	yes	OK			SALL2	chr14	21945334	22005337	36.8065	4.04645	-3.18523	0.000821971	yes	OK
									NNAT	chr20	36145818	36171617	1306.87	97.6135	-3.74289	0.000821971	yes	OK			CHRD	chr3	184097860	184107617	7.7484	0.331067	-4.5487	0.000821971	yes	OK			ACRBP	chr12	6747241	6756580	5.95987	0.649068	-3.19884	0.000821971	yes	OK
									CECR7	chr22	17517459	17551564	12.5136	0.926798	-3.7551	0.000821971	yes	OK			PTN	chr7	136911805	137028546	96.8677	4.00872	-4.5948	0.000821971	yes	OK			LOC400043	chr12	54519854	54526626	9.16891	0.998263	-3.19926	0.000821971	yes	OK
									ASTN1	chr1	176830202	177134024	4.40467	0.318761	-3.78849	0.000821971	yes	OK			MAP2	chr2	210288770	210598882	11.8031	0.473868	-4.63854	0.000821971	yes	OK			PRKACB	chr1	84543744	84704181	10.7953	1.17008	-3.20572	0.000821971	yes	OK
									GPR20	chr8	142366586	142377365	7.61824	0.540452	-3.81722	0.000821971	yes	OK			EPHA3	chr3	89156673	89531439	22.3475	0.881141	-4.6646	0.000821971	yes	OK			PNCK	chrX	152935187	152952155	18.7435	2.0245	-3.21076	0.000821971	yes	OK
									MOB3C	chr1	47073386	47082563	5.44076	0.38359	-3.82617	0.000821971	yes	OK			ZIC2	chr13	100634025	100639019	24.5685	0.957552	-4.68132	0.000821971	yes	OK			TBC1D9	chr4	141541935	141677471	1.80266	0.194162	-3.2148	0.000821971	yes	OK
									TPPP3	chr16	67423711	67427421	53.2638	3.72447	-3.83805	0.000821971	yes	OK			TAGLN3	chr3	111717585	111732735	51.6143	1.96358	-4.71622	0.000821971	yes	OK			C7orf60	chr7	112459201	112579932	3.71725	0.39806	-3.22318	0.000821971	yes	OK
									ADAMTS10	chr19	8645125	8675588	1.85449	0.128892	-3.84678	0.000821971	yes	OK			SULF1	chr8	70378858	70573147	4.72678	0.17956	-4.71832	0.000821971	yes	OK			RAB33A	chrX	129305772	129318844	6.79196	0.725435	-3.22691	0.000821971	yes	OK
									LOC441204	chr7	26443107	26535986	2.18006	0.150302	-3.85843	0.000821971	yes	OK			CDH5	chr16	66400524	66438689	2.67118	0.0995028	-4.74659	0.000821971	yes	OK			THPO	chr3	184089772	184095932	7.81516	0.826506	-3.24118	0.000821971	yes	OK
									CAMK2N1	chr1	20808883	20812728	12.0106	0.825547	-3.86281	0.000821971	yes	OK			LIX1	chr5	96427573	96478520	1.94422	0.0724096	-4.74687	0.000821971	yes	OK			CXCR7	chr2	237478379	237490994	60.5086	6.38587	-3.24418	0.000821971	yes	OK
									LAMP5	chr20	9495004	9511171	4.75111	0.320196	-3.89124	0.000821971	yes	OK			IRX3	chr16	54317211	54320378	11.3543	0.418745	-4.76102	0.000821971	yes	OK			LOXL4	chr10	100007442	100028007	2.93684	0.307123	-3.25738	0.000821971	yes	OK
									TNC	chr9	117781853	117880536	1.16867	0.077986	-3.90551	0.000821971	yes	OK			CAMK2N1	chr1	20808883	20812728	12.0106	0.438336	-4.77613	0.000821971	yes	OK			CTNND2	chr5	10971951	11904502	5.75356	0.600589	-3.26001	0.000821971	yes	OK
									TP53I11	chr11	44748492	44972608	73.3419	4.84781	-3.91923	0.000821971	yes	OK			BCHE	chr3	165490644	165555253	43.4373	1.57613	-4.78448	0.000821971	yes	OK			PTPRZ1	chr7	121512976	121702096	64.1388	6.63902	-3.27215	0.000821971	yes	OK
									WDR31	chr9	116077917	116102620	2.2065	0.144705	-3.93058	0.000821971	yes	OK			CTCFL	chr20	56072221	56100288	28.4588	1.02629	-4.79337	0.000821971	yes	OK			CHRNB2	chr1	154540256	154552353	2.03569	0.210073	-3.27655	0.000821971	yes	OK
									HSD17B14	chr19	49316271	49340044	16.4895	1.05264	-3.96946	0.000821971	yes	OK			WSCD2	chr12	108523510	108644313	1.94682	0.0684869	-4.82915	0.000821971	yes	OK			GTF2A1L,STON1,STON1-GTF2A1L	chr2	48757063	49003656	2.00346	0.204308	-3.29368	0.000821971	yes	OK
									IL21R	chr16	27413482	27464714	3.7218	0.23546	-3.98245	0.000821971	yes	OK			FZD2	chr17	42634811	42638630	73.6729	2.53703	-4.85992	0.000821971	yes	OK			APOL2	chr22	36622254	36636000	5.04933	0.514511	-3.29482	0.000821971	yes	OK
									FHOD3	chr18	33877700	34360341	18.5298	1.17081	-3.98427	0.000821971	yes	OK			ZEB2,ZEB2-AS1	chr2	145141941	145278466	7.62382	0.258416	-4.88275	0.000821971	yes	OK			LOC349160	chr7	136468709	136849088	4.00695	0.408034	-3.29574	0.000821971	yes	OK
									BAHCC1	chr17	79373254	79433358	9.56574	0.586162	-4.0285	0.000821971	yes	OK			CCNYL1,MIR4775	chr2	208576263	208625349	106.471	3.58154	-4.89374	0.000821971	yes	OK			NRG3	chr10	83635069	84746935	2.07772	0.210532	-3.30289	0.000821971	yes	OK
									NECAB2	chr16	84002236	84036382	9.08637	0.55575	-4.03119	0.000821971	yes	OK			VSTM2L	chr20	36531498	36573747	8.71809	0.276116	-4.98066	0.000821971	yes	OK			NHSL2	chrX	71130756	71363424	7.12586	0.718157	-3.31069	0.000821971	yes	OK
									CACNG6	chr19	54495541	54515920	4.21546	0.25565	-4.04345	0.000821971	yes	OK			TMEM119	chr12	108983621	108991894	6.03792	0.182333	-5.0494	0.000821971	yes	OK			FILIP1	chr6	76005530	76203496	9.93623	0.992615	-3.32339	0.000821971	yes	OK
									EMILIN1	chr2	27301434	27309265	21.9378	1.3006	-4.07617	0.000821971	yes	OK			VIPR2	chr7	158820857	158937649	6.05551	0.176777	-5.09824	0.000821971	yes	OK			BMF	chr15	40380091	40401075	4.61118	0.458145	-3.33126	0.000821971	yes	OK
									FOSB	chr19	45971252	45978437	2.82882	0.167223	-4.08035	0.000821971	yes	OK			HEPH	chrX	65382432	65487276	18.1189	0.516267	-5.13324	0.000821971	yes	OK			WSCD1	chr17	5973933	6027747	6.82858	0.67392	-3.34094	0.000821971	yes	OK
									LIX1	chr5	96427573	96478520	1.94422	0.11482	-4.08174	0.000821971	yes	OK			ZIC5	chr13	100615274	100624178	18.0703	0.500775	-5.17331	0.000821971	yes	OK			CADM1	chr11	115044344	115375241	25.8962	2.5325	-3.35411	0.000821971	yes	OK
									LILRB1,LILRB4	chr19	55128628	55179957	4.18243	0.24654	-4.08445	0.000821971	yes	OK			BTBD17	chr17	72352554	72357958	36.0873	0.993468	-5.18288	0.000821971	yes	OK			ARMC4	chr10	28101096	28287977	1.38109	0.133234	-3.37378	0.000821971	yes	OK
									ATP6V1B1	chr2	71162997	71192561	9.18555	0.539761	-4.08897	0.000821971	yes	OK			P2RX3	chr11	57105824	57140128	13.3211	0.361347	-5.20419	0.000821971	yes	OK			CD3G	chr11	118215058	118225879	4.14869	0.399403	-3.37674	0.000821971	yes	OK
									CNTFR	chr9	34551429	34590138	45.6475	2.68079	-4.0898	0.000821971	yes	OK			FHOD3	chr18	33877700	34360341	18.5298	0.439069	-5.39926	0.000821971	yes	OK			MAPRE3	chr2	27193502	27250087	17.2564	1.64905	-3.38743	0.000821971	yes	OK
									VSTM2L	chr20	36531498	36573747	8.71809	0.504582	-4.11085	0.000821971	yes	OK			PRTG	chr15	55903736	56035314	37.1437	0.835995	-5.47348	0.000821971	yes	OK			RASSF2	chr20	4760667	4804291	10.9399	1.04535	-3.38753	0.000821971	yes	OK
									SERPINA5	chr14	95047714	95059457	11.0633	0.635836	-4.12098	0.000821971	yes	OK			CRB2	chr9	126118447	126141032	7.45731	0.163458	-5.51167	0.000821971	yes	OK			SLITRK5	chr13	88324869	88331870	7.10105	0.67719	-3.3904	0.000821971	yes	OK
									FGFBP3	chr10	93654586	93669426	339.29	19.4184	-4.12702	0.000821971	yes	OK			GREB1L	chr18	18822202	19105734	34.4167	0.728883	-5.56128	0.000821971	yes	OK			CPE	chr4	166300096	166419482	34.152	3.25664	-3.39052	0.000821971	yes	OK
									GDPD2	chrX	69642880	69653368	12.1693	0.693208	-4.13382	0.000821971	yes	OK			ZBTB16	chr11	113930430	114121397	10.2516	0.206448	-5.63393	0.000821971	yes	OK			TTLL7	chr1	84335056	84464833	1.56493	0.148572	-3.39686	0.000821971	yes	OK
									SLC38A5	chrX	48316924	48328644	27.2823	1.55275	-4.13507	0.000821971	yes	OK			IGFBP5	chr2	217536827	217560326	23.1756	0.384054	-5.91515	0.000821971	yes	OK			S1PR1	chr1	101702304	101707076	2.24026	0.212495	-3.39817	0.000821971	yes	OK
									OPTC	chr1	203463270	203478077	11.8734	0.66753	-4.15276	0.000821971	yes	OK			MAF	chr16	79619797	79634682	19.0874	0.306226	-5.96188	0.000821971	yes	OK			GLRB	chr4	157997276	158093242	1.88689	0.178319	-3.40347	0.000821971	yes	OK
									LOXL4	chr10	100007442	100028007	2.93684	0.162785	-4.17322	0.000821971	yes	OK			MAPK10	chr4	86934637	87374283	27.6856	0.352401	-6.29578	0.000821971	yes	OK			CNTFR	chr9	34551429	34590138	45.6475	4.31119	-3.40438	0.000821971	yes	OK
									GRIK5	chr19	42502472	42574287	3.43524	0.18974	-4.17832	0.000821971	yes	OK			CCDC160	chrX	133371076	133381029	22.6772	0.264447	-6.42212	0.000821971	yes	OK			IFI27L2	chr14	94594117	94595957	123.451	11.5987	-3.41191	0.000821971	yes	OK
									TINAGL1	chr1	32042085	32053287	37.5841	2.07161	-4.1813	0.000821971	yes	OK			EP300,MIR1281	chr22	41487737	41576124	907.12	9.96694	-6.508	0.000821971	yes	OK			BLCAP	chr20	36145818	36171617	1417.67	132.482	-3.41965	0.000821971	yes	OK
									VGF	chr7	100805787	100823557	50.4046	2.71656	-4.2137	0.000821971	yes	OK			MIR92B	chr1	155164860	155177772	72.8179	0.570779	-6.99522	0.000821971	yes	OK			CADM4	chr19	44126521	44143991	12.6431	1.18025	-3.42119	0.000821971	yes	OK
									C10orf118,MIR2110	chr10	115881028	115934364	58.6217	3.11776	-4.23285	0.000821971	yes	OK			HES5	chr1	2460183	2461684	225.834	1.35468	-7.38117	0.000821971	yes	OK			CD99L2	chrX	149934806	150067289	29.2157	2.7158	-3.4273	0.000821971	yes	OK
									ACTN3	chr11	66314390	66330806	37.989	1.90144	-4.32042	0.000821971	yes	OK			MIR155,MIR155HG	chr21	26934456	26947480	227.647	0.364657	-9.28604	0.000821971	yes	OK			AKR1C1,AKR1C3,AKR1C4	chr10	5005453	5260910	5.54577	0.514235	-3.43089	0.000821971	yes	OK
									BTBD17	chr17	72352554	72357958	36.0873	1.80572	-4.32085	0.000821971	yes	OK			LSAMP	chr3	115509759	116164385	0.237739	13.4636	5.82354	0.0015311	yes	OK			NNAT	chr20	36145818	36171617	1306.87	120.447	-3.43964	0.000821971	yes	OK
									IRX3	chr16	54317211	54320378	11.3543	0.566192	-4.3258	0.000821971	yes	OK			SPIB	chr19	50922194	50934309	0.0588632	2.0803	5.14328	0.0015311	yes	OK			TTYH1	chr19	54926604	54948169	1121.87	101.452	-3.46704	0.000821971	yes	OK
									CACNA1A	chr19	13317127	13617274	5.50998	0.274618	-4.32655	0.000821971	yes	OK			LEUTX	chr19	40267233	40277452	0.43807	15.247	5.12122	0.0015311	yes	OK			IFI6	chr1	27992571	27998724	72.7643	6.57742	-3.46764	0.000821971	yes	OK
									C9orf4	chr9	111898690	111929571	3.23703	0.157961	-4.35703	0.000821971	yes	OK			MAPK13	chr6	36098261	36108076	0.187062	5.97557	4.99749	0.0015311	yes	OK			SERPINA5	chr14	95047714	95059457	11.0633	0.995658	-3.47398	0.000821971	yes	OK
									CD4	chr12	6898637	6929976	4.55722	0.215857	-4.40001	0.000821971	yes	OK			TRIM43B	chr2	96142714	96150479	0.204577	5.8473	4.83705	0.0015311	yes	OK			F10	chr13	113777112	113803892	32.4534	2.87751	-3.49548	0.000821971	yes	OK
									CLDN11	chr3	170136652	170152479	6.17486	0.289305	-4.41574	0.000821971	yes	OK			CASQ1	chr1	160160284	160171676	0.178399	2.30581	3.69209	0.0015311	yes	OK			LOC728392	chr17	5402746	5404319	64.6817	5.67497	-3.51067	0.000821971	yes	OK
									S100A6	chr1	153507075	153508717	748.063	34.1238	-4.45431	0.000821971	yes	OK			AP1M2	chr19	10680750	10697991	3.35231	34.8238	3.37685	0.0015311	yes	OK			SP110	chr2	231033644	231090444	4.92034	0.42899	-3.51974	0.000821971	yes	OK
									AEBP1,MIR4649	chr7	44143949	44163150	132.119	5.93799	-4.47572	0.000821971	yes	OK			MPZL2	chr11	118124130	118135251	0.150579	1.20828	3.00436	0.0015311	yes	OK			CLYBL	chr13	100258918	100552045	39.3335	3.42114	-3.52321	0.000821971	yes	OK
									SDK2	chr17	71330515	71642357	15.5276	0.689508	-4.49312	0.000821971	yes	OK			NKX2-5	chr5	172659106	172662315	0.733809	5.4235	2.88575	0.0015311	yes	OK			CACNG6	chr19	54495541	54515920	4.21546	0.364297	-3.5325	0.000821971	yes	OK
									SULF1	chr8	70378858	70573147	4.72678	0.204249	-4.53246	0.000821971	yes	OK			MSX2	chr5	174151574	174157902	0.19883	1.25562	2.6588	0.0015311	yes	OK			NLGN3	chrX	70364680	70391051	12.1554	1.03759	-3.55029	0.000821971	yes	OK
									MAF	chr16	79619797	79634682	19.0874	0.793132	-4.58892	0.000821971	yes	OK			DHDH	chr19	49436914	49448227	1.28055	7.66971	2.58241	0.0015311	yes	OK			CORO2B	chr15	68871307	69020144	2.68055	0.226034	-3.56792	0.000821971	yes	OK
									ZIC5	chr13	100615274	100624178	18.0703	0.742986	-4.60414	0.000821971	yes	OK			TMEM171	chr5	72416387	72427644	0.818209	4.88526	2.57789	0.0015311	yes	OK			ZSWIM5	chr1	45482073	45672250	5.79807	0.488092	-3.57035	0.000821971	yes	OK
									VIPR2	chr7	158820857	158937649	6.05551	0.245459	-4.62469	0.000821971	yes	OK			ACOX1	chr17	73937586	74002080	1.08905	6.07622	2.4801	0.0015311	yes	OK			EFNB1	chrX	68048839	68062006	85.3512	7.10212	-3.58709	0.000821971	yes	OK
									FOS	chr14	75745480	75748937	186.47	7.4368	-4.64812	0.000821971	yes	OK			CA8	chr8	61099933	61193954	0.791725	4.2303	2.41769	0.0015311	yes	OK			C12orf68	chr12	48577365	48579709	3.65075	0.302851	-3.59151	0.000821971	yes	OK
									DIO3	chr14	102027687	102029789	10.4626	0.410383	-4.67212	0.000821971	yes	OK			SNCB	chr5	176047209	176057557	1.20302	5.97664	2.31268	0.0015311	yes	OK			LIX1	chr5	96427573	96478520	1.94422	0.160297	-3.60037	0.000821971	yes	OK
									CYTL1	chr4	5015871	5021197	9.76841	0.368626	-4.72789	0.000821971	yes	OK			NRG1	chr8	31497267	32622558	0.874906	4.16055	2.24957	0.0015311	yes	OK			SFRP1	chr8	41119475	41166991	232.509	18.6675	-3.63868	0.000821971	yes	OK
									BCHE	chr3	165490644	165555253	43.4373	1.637	-4.72981	0.000821971	yes	OK			SETD1B	chr12	122241986	122270562	1.05748	4.38989	2.05355	0.0015311	yes	OK			CD4	chr12	6898637	6929976	4.55722	0.362196	-3.65331	0.000821971	yes	OK
									P2RX3	chr11	57105824	57140128	13.3211	0.469886	-4.82527	0.000821971	yes	OK			C21orf88	chr21	40969074	40984749	0.855988	3.26329	1.93067	0.0015311	yes	OK			RAMP2	chr17	40905931	40915102	82.2273	6.44998	-3.67225	0.000821971	yes	OK
									CDH5	chr16	66400524	66438689	2.67118	0.0935446	-4.83568	0.000821971	yes	OK			COX7A1	chr19	36641823	36643771	3.15261	11.2825	1.83947	0.0015311	yes	OK			ZEB1	chr10	31608100	31818742	4.9864	0.381759	-3.70726	0.000821971	yes	OK
									COL16A1	chr1	32117847	32169768	3.07856	0.105657	-4.8648	0.000821971	yes	OK			RNF128	chrX	105937067	106040246	0.315588	1.12936	1.83939	0.0015311	yes	OK			CLGN	chr4	141308431	141348815	18.1742	1.38665	-3.71222	0.000821971	yes	OK
									F10	chr13	113777112	113803892	32.4534	1.10192	-4.88028	0.000821971	yes	OK			SLC22A5	chr5	131630144	131731306	0.621202	2.11057	1.7645	0.0015311	yes	OK			EPHA3	chr3	89156673	89531439	22.3475	1.70205	-3.71476	0.000821971	yes	OK
									DUSP6	chr12	89741836	89746296	41.7242	1.41348	-4.88356	0.000821971	yes	OK			SEMA6B	chr19	4542599	4581793	0.915693	2.97955	1.70216	0.0015311	yes	OK			NCALD	chr8	102698769	103137135	3.83743	0.290557	-3.72325	0.000821971	yes	OK
									PDGFRB	chr5	149493401	149535422	2.03439	0.0647347	-4.97391	0.000821971	yes	OK			DNAJA4	chr15	78556486	78574669	1.01769	3.23713	1.66942	0.0015311	yes	OK			CDH5	chr16	66400524	66438689	2.67118	0.201991	-3.72511	0.000821971	yes	OK
									EGR2	chr10	64571753	64578927	3.53285	0.110454	-4.99932	0.000821971	yes	OK			PCSK5	chr9	78505559	78977255	1.76401	4.76436	1.43342	0.0015311	yes	OK			MRC2	chr17	60704761	60770962	42.4566	3.18606	-3.73614	0.000821971	yes	OK
									HEPH	chrX	65382432	65487276	18.1189	0.558717	-5.01924	0.000821971	yes	OK			VLDLR	chr9	2535654	2654485	1.04317	2.77245	1.41019	0.0015311	yes	OK			IQSEC3	chr12	176048	287625	1.02449	0.076432	-3.74459	0.000821971	yes	OK
									ZIC2	chr13	100634025	100639019	24.5685	0.750523	-5.03277	0.000821971	yes	OK			ZNF274	chr19	58694395	58739077	5.00025	13.2453	1.40541	0.0015311	yes	OK			GLDN	chr15	51633712	51700209	1.13111	0.0842891	-3.74625	0.000821971	yes	OK
									LY6H	chr8	144239330	144242053	13.1457	0.392921	-5.06421	0.000821971	yes	OK			LMNA	chr1	156052627	156109878	274.218	714.055	1.38071	0.0015311	yes	OK			RNF165	chr18	43914186	44040783	2.63957	0.193795	-3.7677	0.000821971	yes	OK
									RAMP2	chr17	40905931	40915102	82.2273	2.05152	-5.32485	0.000821971	yes	OK			FAM195A	chr16	691822	698679	17.6795	45.3541	1.35916	0.0015311	yes	OK			NOVA1	chr14	26915088	27066960	4.57461	0.331695	-3.78572	0.000821971	yes	OK
									ATP1A2	chr1	160085519	160113374	17.5802	0.434663	-5.33791	0.000821971	yes	OK			DARS2,LOC100506046	chr1	173768602	173837202	31.6	80.7554	1.35363	0.0015311	yes	OK			MBNL2	chr13	97874573	98046374	1.65112	0.118799	-3.79686	0.000821971	yes	OK
									CCDC160	chrX	133371076	133381029	22.6772	0.546661	-5.37445	0.000821971	yes	OK			TNFRSF12A	chr16	3070312	3072383	68.5195	161.977	1.24121	0.0015311	yes	OK			SOX5	chr12	23683907	24715380	0.988528	0.0709588	-3.80023	0.000821971	yes	OK
									BST2	chr19	17513754	17516384	119.865	2.85026	-5.39417	0.000821971	yes	OK			CLDN23	chr8	8559665	8561617	4.84714	11.3448	1.22683	0.0015311	yes	OK			C9orf4	chr9	111898690	111929571	3.23703	0.231577	-3.80511	0.000821971	yes	OK
									HES5	chr1	2460183	2461684	225.834	5.21776	-5.43569	0.000821971	yes	OK			AXIN2	chr17	63524681	63557740	2.6058	6.02794	1.20994	0.0015311	yes	OK			TFAP2B	chr6	50786438	50815326	1.74518	0.123735	-3.81805	0.000821971	yes	OK
									TIE1	chr1	43766565	43788781	4.86564	0.110935	-5.45484	0.000821971	yes	OK			COL1A1	chr17	48261456	48287426	7.65224	17.3242	1.17884	0.0015311	yes	OK			ASTN1	chr1	176830202	177134024	4.40467	0.311014	-3.82398	0.000821971	yes	OK
									TMEM119	chr12	108983621	108991894	6.03792	0.123896	-5.60685	0.000821971	yes	OK			RRM2	chr2	10260692	10271614	30.4066	66.741	1.13419	0.0015311	yes	OK			CNRIP1	chr2	68511302	68547183	3.31093	0.233257	-3.82725	0.000821971	yes	OK
									CTCFL	chr20	56072221	56100288	28.4588	0.500113	-5.83047	0.000821971	yes	OK			PDCD2L	chr19	34895302	34917072	13.7805	30.2309	1.13339	0.0015311	yes	OK			TINAGL1	chr1	32042085	32053287	37.5841	2.64611	-3.82818	0.000821971	yes	OK
									TMEM59L	chr19	18723681	18731849	16.8065	0.254284	-6.04644	0.000821971	yes	OK			BAK1	chr6	33540230	33548097	12.0275	25.4518	1.08143	0.0015311	yes	OK			ARNT2	chr15	80696691	80890277	4.96322	0.347747	-3.83516	0.000821971	yes	OK
									SLITRK6	chr13	86366921	86373483	5.40158	0.0763643	-6.14434	0.000821971	yes	OK			PDE4DIP	chr1	144851423	145076186	4.64694	9.80551	1.07731	0.0015311	yes	OK			MIR3605,PHC2	chr1	33774372	33841194	79.6389	5.52649	-3.84904	0.000821971	yes	OK
									IGFBP5	chr2	217536827	217560326	23.1756	0.324768	-6.15705	0.000821971	yes	OK			LOC147804,ZNF525,ZNF761,ZNF765,ZNF813,ZNF845	chr19	53837001	53998042	13.635	28.543	1.06582	0.0015311	yes	OK			HSD17B14	chr19	49316271	49340044	16.4895	1.13551	-3.86013	0.000821971	yes	OK
									MAPK10	chr4	86934637	87374283	27.6856	0.358667	-6.27035	0.000821971	yes	OK			C1orf106	chr1	200860068	200884864	6.2634	12.9213	1.04473	0.0015311	yes	OK			LOC441204	chr7	26443107	26535986	2.18006	0.147597	-3.88464	0.000821971	yes	OK
									EP300,MIR1281	chr22	41487737	41576124	907.12	10.6011	-6.41901	0.000821971	yes	OK			NFKBIA	chr14	35870715	35873960	26.9927	54.643	1.01747	0.0015311	yes	OK			SEMA5B	chr3	122628039	122747452	5.98736	0.398137	-3.91058	0.000821971	yes	OK
									EGR1	chr5	137800933	137815373	57.2681	0.562258	-6.67035	0.000821971	yes	OK			PSPH	chr7	56077898	56119268	14.5506	29.3375	1.01166	0.0015311	yes	OK			ZNF521	chr18	22641887	22932214	7.58177	0.495188	-3.93649	0.000821971	yes	OK
									SLC6A12,SLC6A13	chr12	299242	372039	5.27798	0.0492965	-6.74236	0.000821971	yes	OK			SESN2	chr1	28585962	28609002	15.9523	31.9074	1.00013	0.0015311	yes	OK			LOC375190	chr2	24346349	24414567	14.8996	0.961309	-3.95413	0.000821971	yes	OK
									MIR92B	chr1	155164860	155177772	72.8179	0.522693	-7.12218	0.000821971	yes	OK			DHX37	chr12	125431369	125473667	10.3146	20.5631	0.995374	0.0015311	yes	OK			CXXC4	chr4	105389445	105416083	5.68359	0.362222	-3.97186	0.000821971	yes	OK
									MIR1287,PYROXD2	chr10	100143321	100175295	29.0277	0.123658	-7.87494	0.000821971	yes	OK			SFT2D1	chr6	166733207	166755991	73.0813	145.395	0.992407	0.0015311	yes	OK			MFNG	chr22	37865100	37882478	6.93327	0.436726	-3.98874	0.000821971	yes	OK
									CD53	chr1	111413820	111442558	0.156224	4.66223	4.89933	0.0015311	yes	OK			MTMR11,SF3B4	chr1	149895124	149911728	96.2814	191.496	0.991988	0.0015311	yes	OK			TMEM119	chr12	108983621	108991894	6.03792	0.379986	-3.99003	0.000821971	yes	OK
									KLF2	chr19	16435650	16438339	0.446365	7.13679	3.99898	0.0015311	yes	OK			NEK2	chr1	211831598	211848994	16.513	32.5055	0.977081	0.0015311	yes	OK			RBM24	chr6	17281808	17294099	6.05121	0.380759	-3.99028	0.000821971	yes	OK
									FAAH2	chrX	57313109	57515629	0.142125	1.94127	3.77177	0.0015311	yes	OK			DENR	chr12	123237307	123257737	41.3295	81.0277	0.971242	0.0015311	yes	OK			MUM1L1	chrX	105412297	105452949	4.91196	0.308421	-3.99333	0.000821971	yes	OK
									ADAMTS19	chr5	128796006	129074498	0.540521	4.22837	2.96768	0.0015311	yes	OK			TUBB6	chr18	12308256	12326568	73.8056	142.921	0.953421	0.0015311	yes	OK			EGR2	chr10	64571753	64578927	3.53285	0.221304	-3.99673	0.000821971	yes	OK
[truncated: 1,935 more rows]

## Sheet: Fig 4G
Fig 4G	Human RNAseq Barchart
	Log2_Fold change in FPKM versus Primed cells
		Treatment
	Gene	2i/p38i/JNKi	8i/p38i/JNKi	8iONLY
	NODAL	8.64599	8.46588	8.85753
	DMNT3L	9.45141	8.18893	9.04328
[truncated: 17 more rows]

[truncated: 4 more sheets: Fig 4H, Fig 4J, Fig 4K, Fig 4L]
