# Supplementary material for: Global hyperactivation of enhancers stabilizes human and mouse naive pluripotency through inhibition of CDK8/19 Mediator kinases
Source: Springer Nature journal article supplement (doi:10.1038/s41556-020-0573-1), 2020-09-28
Supplement: MOESM13 [file 41556_2020_573_MOESM13_ESM.xlsx]

## Sheet: Fig 6A
Fig 6A	Pol II Fold change at TSS
	Summary for plot below, calculations are on right							Calculation of Log2 fold change in Total RNA Pol II abundance at promoters in 2i or CDK8/19i versus control Serum/LIF conditions, for the plot in Figure 6A																					Calculation of Log2 fold change in Serine 5-Phosphorylated RNA Pol II abundance at promoters in 2i or CDK8/19i versus control Serum/LIF conditions, for the plot in Figure 6A
	Comparison of Total or Ser5P Pol II in (Drug vs Ctrl)
	Total Pol II 2i/Ctrl	Total Pol II CDK8/19i/Ctrl	Ser5P Pol II 2i/Ctrl	Ser5P Pol II CDK8/19i/Ctrl				Merged list gives 12693 TSS	After De-duplication, n=12,072 high confidence genes	Gene	Ctrl_Prom_TotPolII	2i_Prom_TotPolII	8i_Prom_TotPolII		Linear FC	[2i/Ctrl]_Prom_TotPolII	[8i/Ctrl]_Prom_TotPolII		Log2FC	[2i/Ctrl]_Prom_TotPolII	[8i/Ctrl]_Prom_TotPolII			Log2FC Total Pol II: 2i/Ctrl	Log2FC Total Pol II: 8i/Ctrl				Data where Total Pol II >3000 n=4470	Gene	Ctrl Total promoter	2i Total promoter	8i Total promoter	Ctrl Ser5P promoter	2i Ser5P promoter	8i Ser5P promoter	Ratio: Total Pol II: 2i/Ctrl	Ratio: Total Pol II: 8i/Ctrl	Log2FC Total Pol II: 2i/Ctrl	Log2FC Total Pol II: 8i/Ctrl	Ratio: Ser5P Pol II: 2i/Ctrl	Ratio: Ser5P Pol II: 8i/Ctrl	Log2FC Ser5P Pol II: 2i/Ctrl	Log2FC Ser5P Pol II: 8i/Ctrl		Log2FC Ser5P Pol II: 2i/Ctrl	Log2FC Ser5P Pol II: 8i/Ctrl
	-0.08975	2.79594e-05	0.167266	0.03539					1	0610007C21Rik	14881.5	26446.8	36041.7			1.77716	2.42191			0.829571	1.27614			0.767166	0.961013	Mean				Gm10106	97522.4	91640.5	97524.2	111405	125099	114171	0.939687	1.00002	-0.0897472	2.79594e-05	1.12293	1.02483	0.167266	0.0353897		0.500438	0.261281
	0.166509	0.338502	0.068083	0.473744					2	0610007N19Rik	3994.18	7124.92	6988.41			1.78383	1.74965			0.834974	0.807065			0.417056	0.403436	Std Dev				mt-Nd2	66264.7	74371.5	83787.9	78852	82662.4	109502	1.12234	1.26444	0.166509	0.338502	1.04832	1.38871	0.0680826	0.473744		0.40235	0.406131
	0.192784	0.220779	0.067378	0.400967					3	0610007P08Rik	20035.3	33799.4	32485.2			1.68699	1.6214			0.754452	0.697236									mt-Cytb	66616.9	76140.9	77632.8	80866.2	84732.5	106775	1.14297	1.16536	0.192784	0.220779	1.04781	1.32039	0.0673785	0.400967
	-0.12046	-0.112426	0.226617	0.08001					4	0610007P14Rik	9281.09	16294.1	17370.1			1.75563	1.87156			0.811986	0.90424									Gm10718	94228.2	86680.1	87164	100990	118168	106749	0.919896	0.925031	-0.120458	-0.112426	1.17009	1.05703	0.226617	0.0800095
	-0.12543	-0.0676812	0.173469	0.010809					5	0610007P22Rik	9074.94	19927.5	21038.3			2.19588	2.31828			1.1348	1.21306									Gm10800	100142	91803.7	95552.7	105637	119134	106432	0.916734	0.95417	-0.125426	-0.0676812	1.12777	1.00752	0.173469	0.0108094
	0.197238	0.401148	0.108364	0.430947					6	0610009B22Rik	11643.2	26880.6	30131.4			2.30869	2.58788			1.20707	1.37177									mt-Nd1	64834.5	74332.8	85617.7	78027.5	84114	105190	1.1465	1.32056	0.197238	0.401148	1.078	1.34812	0.108364	0.430947
	-0.08746	-0.0547472	0.213686	0.038871					7	0610009D07Rik	10273.2	16019.3	19440.4			1.55933	1.89234			0.640923	0.920174									Gm11168	95465.1	89849.6	91910.3	101892	118159	104675	0.941177	0.962763	-0.0874615	-0.0547472	1.15965	1.02731	0.213686	0.0388708
	0.255431	0.39978	0.148814	0.473628					8	0610009E02Rik	4256.16	11952.2	16760.2			2.80821	3.93786			1.48965	1.97741									mt-Rnr1	64160.2	76587.6	84647	74828.1	82958.7	103906	1.19369	1.31931	0.255431	0.39978	1.10866	1.3886	0.148814	0.473628
	-0.10831	-0.0931935	0.129153	0.023985					9	0610009L18Rik	8370.59	13068.8	22747.8			1.56128	2.71758			0.642725	1.44232									Gm10721	88151.1	81775.6	82636.8	101420	110918	103120	0.927675	0.937445	-0.108308	-0.0931935	1.09365	1.01676	0.129153	0.023985
	-0.05766	-0.111448	0.122991	-0.00351					10	0610009O20Rik	18575.1	32931.8	32068.5			1.7729	1.72643			0.826115	0.787791									Gm10717	91041.5	87474.6	84273.3	102631	111764	102381	0.960822	0.925658	-0.057659	-0.111448	1.08899	0.997568	0.122991	-0.00351293
	-0.20533	-0.0782998	0.17228	0.101474					11	0610010F05Rik	18124.1	33138	51822.5			1.82839	2.85931			0.870575	1.51567									Gm10715	87554.1	75939.1	82928.9	95231.4	107310	102171	0.867339	0.947173	-0.205332	-0.0782998	1.12684	1.07287	0.17228	0.101474
	0.346439	0.454663	0.037489	0.518345					12	0610010K14Rik	23608.6	31115.2	45718.9			1.31796	1.93654			0.398306	0.953479									mt-Nd6	52259.3	66443.4	71619.4	69833.5	71671.9	100023	1.27142	1.37046	0.346439	0.454663	1.02633	1.43231	0.0374889	0.518345
	0.14755	0.266542	0.006121	0.308895					13	0610011F06Rik	15663.2	29968.5	32395			1.91331	2.06822			0.936068	1.04839									mt-Nd5	61523.2	68148.4	74007.6	80020.1	80360.4	99125.6	1.10769	1.20292	0.14755	0.266542	1.00425	1.23876	0.00612051	0.308895
	0.167401	0.273331	-0.08188	0.451938					14	0610011L14Rik	7584.64	14520.4	11047.5			1.91445	1.45656			0.93693	0.542561									mt-Rnr2	57026.6	64042.7	68922	71370.9	67432.9	97626.7	1.12303	1.20859	0.167401	0.273331	0.944823	1.36788	-0.0818835	0.451938
	-0.24112	-0.0489904	0.219645	0.101904					15	0610012G03Rik	11832.2	25905.7	23387.8			2.18942	1.97662			1.13055	0.983035									Gm17535	85149	72043.8	82306.1	90112.3	104931	96707.5	0.846091	0.966613	-0.241116	-0.0489904	1.16445	1.07319	0.219645	0.101904
	0.302771	0.398533	0.092229	0.346837					16	0610012H03Rik	3951.23	6669.68	8869.74			1.688	2.2448			0.755316	1.16659									mt-Co1	61256.9	75561.1	80746.9	75150.1	80111.2	95573.6	1.23351	1.31817	0.302771	0.398533	1.06602	1.27177	0.0922291	0.346837
	-0.09905	-0.158788	0.211303	0.064823					17	0610030E20Rik	9744.93	19957.5	21510.7			2.04799	2.20738			1.03421	1.14233									Gm10722	85922.1	80220.9	76967.1	89863.2	104038	93993.1	0.933647	0.895778	-0.0990508	-0.158788	1.15773	1.04596	0.211303	0.064823
	-0.12837	-0.0918648	0.218275	0.061679					18	0610031J06Rik	8469.37	17032.8	18641.5			2.01111	2.20105			1.00799	1.13819									Gm10801	84517.6	77321.9	79303.7	89038.7	103582	92927.9	0.914862	0.938309	-0.128375	-0.0918648	1.16334	1.04368	0.218275	0.0616791
	-0.03533	-0.0835778	0.190992	0.016218					19	0610037L13Rik	19683.1	30264.8	36759			1.5376	1.86754			0.620682	0.901137									Gm16869	82640.8	80641.8	77989.3	91400.7	104338	92433.9	0.97581	0.943714	-0.0353274	-0.0835778	1.14155	1.0113	0.190992	0.0162178
	0.370096	0.553663	0.029193	0.468142					20	0610037P05Rik	15049	20326.9	22795			1.35071	1.51472			0.433717	0.599049									mt-Co3	45404.8	58682.9	66645.5	65131	66462.3	90097.4	1.29244	1.46781	0.370096	0.553663	1.02044	1.38333	0.0291925	0.468142
	0.309662	0.321004	0.076182	0.425178					21	0610038P03Rik	11153.6	16216.8	11588.6			1.45395	1.039			0.539978	0.0551992									mt-Atp6	48230.8	59778.1	60249.8	65977	69554.6	88589.9	1.23942	1.2492	0.309662	0.321004	1.05422	1.34274	0.0761821	0.425178
	0.216924	0.557716	0.107525	0.493531					22	0610039K10Rik	20516.3	34271.8	49017.7			1.67046	2.3892			0.740248	1.25653									Gm10925	43905.9	51029.7	64626.7	61661	66432.2	86811.7	1.16225	1.47194	0.216924	0.557716	1.07738	1.40789	0.107525	0.493531
	-0.01616	0.00225719	0.186594	0.035502					23	0610040B10Rik	6961.89	16156.7	16519.6			2.32073	2.37287			1.21458	1.24663									Gm10716	70692.6	69905	70803.3	81596.2	92862.6	83629.1	0.988858	1.00157	-0.0161646	0.00225719	1.13807	1.02491	0.186594	0.0355017
	-0.08168	-0.0778873	0.21208	0.076973					24	0610040F04Rik	7610.41	13966.4	20827.8			1.83517	2.73675			0.875914	1.45246									Gm11167	69163.7	65356.9	65528.7	77761.2	90075.2	82022.7	0.94496	0.947444	-0.0816755	-0.0778873	1.15836	1.0548	0.21208	0.0769727
	0.233324	0.335531	0.087207	0.497233					25	0910001L09Rik	15177.9	30879	33490.3			2.03447	2.20652			1.02465	1.14177									mt-Nd4	41732.7	49058.5	52660.1	56232.7	59736.6	79372.7	1.17554	1.26184	0.233324	0.335531	1.06231	1.4115	0.0872065	0.497233
	0.444108	0.629815	-0.05721	0.486001					26	1010001B22Rik	10251.7	16478.8	17395.9			1.60742	1.69687			0.684745	0.762879									mt-Co2	36669.1	49887.3	56740.6	55249.2	53101.1	77379.8	1.36047	1.54737	0.444108	0.629815	0.961119	1.40056	-0.0572123	0.486001
	-0.22487	-0.092917	0.157447	0.036673					27	1110001A16Rik	13756.3	30896.1	36222.1			2.24596	2.63313			1.16734	1.39678									Gm10720	66337.7	56763.2	62199.9	73750.1	82254.4	75648.9	0.85567	0.937625	-0.224874	-0.092917	1.11531	1.02575	0.157447	0.0366729
	-0.10529	0.0282821	0.139566	0.017338					28	1110001J03Rik	8469.37	15615.6	21227.2			1.84377	2.50636			0.882658	1.32559									Gm10719	63481.7	59013.6	64738.4	74634.8	82215.7	75537.2	0.929617	1.0198	-0.105292	0.0282821	1.10157	1.01209	0.139566	0.0173385
	0.198352	0.295623	0.142372	0.493283					29	1110002B05Rik	20744	35787.8	37033.9			1.72522	1.78529			0.786778	0.836155									mt-Nd3	39039.9	44793.8	47918.1	47690.9	52637.3	67131.8	1.14739	1.22741	0.198352	0.295623	1.10372	1.40764	0.142372	0.493283
	-0.18882	0.0613447	-0.0382	0.230126					30	1110002L01Rik	12287.5	23844.2	20690.3			1.94053	1.68386			0.956453	0.751771									AY036118	70976.1	62269	74059.1	51148	49811.3	59993.4	0.877323	1.04344	-0.188819	0.0613447	0.973867	1.17294	-0.0382036	0.230126
	-0.13222	0.27816	-0.19121	-0.03654					31	1110002N22Rik	16668.2	23032.5	31372.7			1.38183	1.88219			0.466577	0.912414									Sfi1	63820.9	58232	77392.3	53325.3	46706.2	51991.7	0.912427	1.21265	-0.132218	0.27816	0.875872	0.974991	-0.191208	-0.0365394
	-0.39493	-0.48699	-0.10495	-0.11321					32	1110003E01Rik	23930.7	42710.9	42763.8			1.78477	1.78698			0.835741	0.837526									Gm12735	50507	38411.9	36037.4	49657.8	46173.6	45909.9	0.760526	0.713512	-0.394931	-0.48699	0.929836	0.924526	-0.104951	-0.113215
	0.165985	0.405574	0.791218	0.669902					33	1110004E09Rik	12364.8	23762.6	22614.6			1.9218	1.82896			0.942459	0.871021									Hist1h4i	68669.8	77042.8	90961.1	24294.2	42042	38651.2	1.12193	1.32462	0.165985	0.405574	1.73053	1.59096	0.791218	0.669902
	0.266496	0.365971	-0.05557	0.344428					34	1110004F10Rik	13107.8	25794	27837.7			1.96784	2.12375			0.976615	1.08662									Gm13340	23303.7	28031.6	30032.6	30070.4	28934.2	38178.8	1.20288	1.28875	0.266496	0.365971	0.962216	1.26965	-0.0555669	0.344428
	0.251278	0.385777	0.718055	0.630408					35	1110005A03Rik	14795.6	27765.3	43038.7			1.87659	2.90887			0.908111	1.54046									Hist1h4h	62721.5	74654.9	81949.6	21331	35088.7	33020.4	1.19026	1.30656	0.251278	0.385777	1.64496	1.548	0.718055	0.630408
	0.096409	0.31861	0.756477	0.657125					36	1110007C09Rik	10887.4	22083.4	24427.2			2.02835	2.24363			1.02031	1.16584									Hist1h3i	58581.3	62629.8	73058.4	20536.5	34693.5	32384.7	1.06911	1.24713	0.0964086	0.31861	1.68936	1.57694	0.756477	0.657125
	0.461595	0.512498	0.250172	0.517435					37	1110008F13Rik	15220.8	25884.2	31699.1			1.70058	2.08262			0.766027	1.0584									Gm13341	16127	22207.9	23005.5	22576.4	26851.2	32316	1.37706	1.42652	0.461595	0.512498	1.18935	1.43141	0.250172	0.517435
	0.29667	0.364548	0.572272	0.523327					38	1110008J03Rik	10479.4	17127.3	22271			1.63439	2.12523			0.708749	1.08762									Hist1h4m	61506	75548.2	79187.7	22391.7	33293.4	32182.9	1.22831	1.28748	0.29667	0.364548	1.48686	1.43727	0.572272	0.523327
	0.430429	0.568569	0.701128	0.503064					39	1110008L16Rik	5699.22	12583.5	12765.6			2.20793	2.23988			1.1427	1.16342									Hist1h1c	55231.3	74431.6	81910.9	22417.5	36445.8	31770.5	1.34763	1.48305	0.430429	0.568569	1.62578	1.41722	0.701128	0.503064
	-0.62732	-0.138356	-0.38572	-0.09807					40	1110008P14Rik	6197.42	17007	16343.5			2.74421	2.63715			1.45639	1.39898									Gm11399	32606.2	21108.5	29624.5	32814.6	25116.1	30658.1	0.647376	0.908554	-0.627324	-0.138356	0.765395	0.934283	-0.385725	-0.0980677
	0.216552	0.40509	0.996137	0.576092					41	1110012J17Rik	17256.6	28740.2	33769.5			1.66547	1.95691			0.735925	0.968574									Hist1h4d	64164.5	74556.2	84964.9	20386.2	40663.3	30391.8	1.16195	1.32417	0.216552	0.40509	1.99465	1.49081	0.996137	0.576092
	0.326344	0.481817	0.846402	0.405824					42	1110012L19Rik	6480.87	14498.9	14844.5			2.23719	2.29051			1.16169	1.19567									Hist1h4k	60041.5	75282	83848.1	22842.7	41071.3	30263	1.25383	1.3965	0.326344	0.481817	1.79801	1.32485	0.846402	0.405824
	0.456603	0.498392	1.02318	0.717583					43	1110014N23Rik	3663.48	5282.49	4346.82			1.44193	1.18653			0.528003	0.246746									Hist1h3h	55308.6	75900.4	78131.1	18372	37339.2	30211.4	1.37231	1.41264	0.456603	0.498392	2.03239	1.64442	1.02318	0.717583
	0.274424	0.471698	1.02255	0.752997					44	1110018G07Rik	9461.48	17866	18327.9			1.88829	1.93711			0.917078	0.953907									Hist2h2aa2	56180.5	67950.9	77907.7	17796.6	36153.8	29992.4	1.20951	1.38674	0.274424	0.471698	2.0315	1.68529	1.02255	0.752997
	0.236707	0.543026	0.770504	0.450691					45	1110018J18Rik	20739.7	31690.7	42901.2			1.52802	2.06856			0.611665	1.04863									Hist1h1d	56957.8	67113.4	82989	21863.5	37296.2	29880.7	1.1783	1.45703	0.236707	0.543026	1.70587	1.36669	0.770504	0.450691
	0.296112	0.627406	1.11345	0.951251					46	1110019D14Rik	11553	25785.4	19900			2.23192	1.72249			1.15828	0.784495									Hist1h3d	50438.3	61929.7	77916.3	15262.8	33022.9	29511.3	1.22783	1.54478	0.296112	0.627406	2.16362	1.93355	1.11345	0.951251
	-0.0128	-0.00255169	0.034803	0.156083					47	1110020G09Rik	15311	30853.2	29328.1			2.0151	1.91549			1.01085	0.937716									Fau-ps2	22912.8	22710.4	22872.3	26454.4	27100.3	29477	0.991166	0.998233	-0.0128013	-0.00255169	1.02442	1.11426	0.0348033	0.156083
	0.411087	0.839201	0.615057	0.880919					48	1110021J02Rik	7966.88	14597.7	15029.2			1.8323	1.88646			0.873656	0.915679									Hist1h1e	44365.4	58992.1	79372.4	15941.3	24416	29356.7	1.32969	1.78906	0.411087	0.839201	1.53162	1.84155	0.615057	0.880919
	0.428675	0.552384	0.985304	0.640897					49	1110021L09Rik	4346.35	9478.42	6941.17			2.18078	1.59701			1.12484	0.675375									Hist1h4a	53221.3	71635.8	78049.5	18526.6	36677.8	28888.6	1.346	1.46651	0.428675	0.552384	1.97973	1.5593	0.985304	0.640897
	0.547899	0.66845	0.459134	0.516588					50	1110028C15Rik	27233.4	44866.8	49232.4			1.64749	1.8078			0.720271	0.854231									2410006H16Rik	48247.9	70536.3	76683.6	20175.8	27735.9	28862.8	1.46195	1.58936	0.547899	0.66845	1.37472	1.43057	0.459134	0.516588
	0.196653	0.370702	0.895639	0.481283					51	1110031I02Rik	17415.5	39644.5	49498.8			2.27639	2.84223			1.18675	1.50702									Hist1h3e	60071.6	68844.2	77671.5	20321.8	37807.3	28368.9	1.14604	1.29298	0.196653	0.370702	1.86043	1.39598	0.895639	0.481283
	0.290404	0.393412	0.776715	0.210567					52	1110032A03Rik	6145.88	10878.5	12653.9			1.77005	2.05892			0.823788	1.04189									Hist1h4n	63417.2	77558.2	83298.3	24070.9	41238.8	27853.5	1.22298	1.3135	0.290404	0.393412	1.71322	1.15714	0.776715	0.210567
	0.200421	0.5099	0.605492	0.341092					53	1110032F04Rik	3925.46	6115.67	7989.21			1.55795	2.03523			0.639649	1.02519									Hist4h4	64280.5	73860.4	91532.3	21975.2	33435.2	27836.3	1.14903	1.42395	0.200421	0.5099	1.5215	1.26672	0.605492	0.341092
	0.300658	0.427286	0.952397	0.710504					54	1110034A24Rik	4118.73	6235.92	7035.66			1.51404	1.70821			0.598403	0.772486									Hist2h3c2	56378	69441.2	75811.6	16903.3	32709.3	27660.2	1.23171	1.3447	0.300658	0.427286	1.93508	1.63638	0.952397	0.710504
	0.216314	0.398224	0.861908	0.680085					55	1110034B05Rik	5583.26	9873.54	5442.11			1.76842	0.974719			0.82246	-0.0369416									Hist2h3c1	55188.4	64115.7	72731.9	17255.5	31360.8	27647.3	1.16176	1.31788	0.216314	0.398224	1.81744	1.60223	0.861908	0.680085
	0.216314	0.398224	0.861908	0.680085					56	1110034G24Rik	4067.19	7545.8	7959.15			1.85529	1.95692			0.891641	0.968582									Hist2h3c1	55188.4	64115.7	72731.9	17255.5	31360.8	27647.3	1.16176	1.31788	0.216314	0.398224	1.81744	1.60223	0.861908	0.680085
	0.515982	0.695617	1.01258	0.730968					57	1110035H17Rik	15890.8	34164.4	37557.9			2.14995	2.3635			1.1043	1.24092									Hist2h2aa1	45464.9	65013.3	73633.9	16297.8	32881.1	27050.3	1.42997	1.61958	0.515982	0.695617	2.01752	1.65975	1.01258	0.730968
	0.383481	0.880847	1.07013	1.06011					58	1110035M17Rik	7524.51	22740.5	24594.8			3.02219	3.26862			1.59559	1.70868									Hist1h2ao	39744.2	51845.7	73187.2	12604.5	26464.7	26281.5	1.30449	1.84146	0.383481	0.880847	2.09963	2.08509	1.07013	1.06011
	0.476376	0.603002	0.977276	0.529143					59	1110036E04Rik	5351.34	15259.1	14217.4			2.85145	2.65679			1.5117	1.40968									Rdm1	43038.3	59876.8	65369.8	18200.3	35831.7	26264.3	1.39124	1.51887	0.476376	0.603002	1.96874	1.44307	0.977276	0.529143
	0.311083	0.506575	0.947728	0.518479					60	1110037F02Rik	7442.91	13906.3	15020.6			1.86839	2.01811			0.901797	1.013									Hist1h4f	57765.2	71665.8	82065.5	18071.4	34856.8	25886.3	1.24064	1.42067	0.311083	0.506575	1.92883	1.43244	0.947728	0.518479
	0.072426	-0.180638	-0.14073	-0.24475					61	1110038B12Rik	37334.8	61264	60352.9			1.64094	1.61653			0.714518	0.692902									Gm11400	26181.2	27529.1	23100	29924.3	27143.2	25254.9	1.05148	0.882312	0.0724262	-0.180638	0.907062	0.84396	-0.140726	-0.244754
	0.185882	0.686861	0.59701	0.635331					62	1110038D17Rik	15242.3	21155.7	18340.8			1.38796	1.20328			0.472969	0.266978									Hist1h3b	48119.1	54736.1	77461	16173.2	24463.3	25121.8	1.13751	1.60978	0.185882	0.686861	1.51258	1.55329	0.59701	0.635331
	0.201816	0.440823	0.858546	0.502243					63	1110038F14Rik	6815.87	11033.1	15725			1.61874	2.30712			0.69487	1.20609									Hist1h3g	54509.8	62694.2	73990.4	17715	32121	25091.7	1.15015	1.35738	0.201816	0.440823	1.81321	1.41641	0.858546	0.502243
	0.207575	0.233741	0.680245	0.257599					64	1110046J04Rik	9233.85	12802.5	16592.7			1.38648	1.79694			0.471425	0.84554									Grcc10	67347	77768.6	79192	20841.4	33396.5	24915.6	1.15475	1.17588	0.207575	0.233741	1.60241	1.19549	0.680245	0.257599
	0.420689	0.567281	0.65403	0.39886					65	1110049F12Rik	27254.9	50376.9	51551.9			1.84836	1.89147			0.886248	0.919511									Hist1h4b	48935.1	65502.9	72508.6	18767.1	29531.2	24743.8	1.33857	1.48173	0.420689	0.567281	1.57356	1.31847	0.65403	0.39886
	0.328185	0.65602	0.973939	0.467576					66	1110051M20Rik	4522.44	3586.08	4316.75			0.792952	0.954518			-0.334694	-0.0671558									Hist2h3b	46182.1	57978.6	72770.6	17689.2	34745.1	24460.4	1.25543	1.57573	0.328185	0.65602	1.9642	1.38278	0.973939	0.467576
	0.37351	0.762917	0.813208	0.946321					67	1110054M08Rik	4646.99	8177.13	7692.84			1.75966	1.65545			0.815298	0.72722									Hist1h2ac	34994.2	45335	59382.2	12424.1	21830.6	23940.7	1.2955	1.69692	0.37351	0.762917	1.75711	1.92695	0.813208	0.946321
	0.281	0.717144	1.32453	0.951855					68	1110057K04Rik	6618.31	16453	22593.2			2.48599	3.41373			1.31382	1.77135									Hist1h2br	44412.7	53963	73011.1	12321	30858.3	23833.3	1.21504	1.64392	0.281	0.717144	2.50452	1.93436	1.32453	0.951855
	1.13826	0.279379	0.354416	-0.26707					69	1110058L19Rik	14061.2	22495.7	22558.8			1.59984	1.60433			0.677927	0.681968									Igkc	15667.5	34486.5	19015.2	28292.4	36171	23511.2	2.20115	1.21367	1.13826	0.279379	1.27847	0.831005	0.354416	-0.267071
	0.378764	0.240022	0.675584	-0.02565					70	1110059E24Rik	5454.41	11552.8	10549.2			2.11806	1.93407			1.08274	0.951639									2610005L07Rik	53066.7	68998.8	62672.4	23718.7	37884.6	23300.7	1.30023	1.18101	0.378764	0.240022	1.59724	0.982375	0.675584	-0.0256547
	0.179739	0.554648	1.14304	0.930636					71	1110059G10Rik	12175.8	16719.3	23684.2			1.37316	1.94518			0.457498	0.959905									Hist1h2ap	49321.7	55865.6	72444.1	12183.6	26907	23223.4	1.13268	1.46881	0.179739	0.554648	2.20846	1.90612	1.14304	0.930636
	0.396247	0.714555	1.20953	0.839879					72	1110065P20Rik	16401.9	23839.9	30767.1			1.45349	1.87582			0.539517	0.907524									Hist1h2bk	42063.4	55358.8	69025.1	12905.1	29844.7	23098.8	1.31608	1.64098	0.396247	0.714555	2.31263	1.7899	1.20953	0.839879
	0.39572	0.687476	0.545672	0.665183					73	1110067D22Rik	8847.32	19072.8	24800.9			2.15577	2.80321			1.10821	1.48708									Malat1	41569.5	54688.8	66946.2	14352.4	20950.1	22759.5	1.3156	1.61046	0.39572	0.687476	1.4597	1.58577	0.545672	0.665183
	-0.08739	0.513712	0.751666	0.587868					74	1190002H23Rik	10337.6	18355.6	30891.6			1.77561	2.98827			0.828315	1.57931									Hist1h2ai	48174.9	45343.6	68780.2	15108.2	25438.2	22708	0.941227	1.42772	-0.0873852	0.513712	1.68374	1.50302	0.751666	0.587868
	0.612967	0.694639	1.15421	0.694552					75	1190002N15Rik	9946.79	14627.8	16867.5			1.4706	1.69578			0.556408	0.761948									Hist2h4	46830.7	71622.9	75794.4	13789.8	30690.8	22317.1	1.5294	1.61848	0.612967	0.694639	2.22562	1.61838	1.15421	0.694552
	0.271846	0.797585	0.978236	0.82741					76	1190003J15Rik	4904.68	4715.59	9982.22			0.961447	2.03524			-0.0567207	1.0252									Hist1h2bn	37588.2	45382.2	65335.4	12424.1	24476.2	22046.5	1.20735	1.73819	0.271846	0.797585	1.97006	1.7745	0.978236	0.82741
	0.37502	0.657789	0.846896	0.388266					77	1190005F20Rik	14559.4	24570	32532.4			1.68757	2.23446			0.754947	1.15993									Hist1h3c	44309.6	57463.2	69905.6	16710	30055.1	21870.4	1.29686	1.57766	0.37502	0.657789	1.79863	1.30882	0.846896	0.388266
	0.439392	0.608074	0.798291	0.371684					78	1190005I06Rik	10054.2	14726.6	15050.6			1.46472	1.49696			0.550628	0.582033									Hist1h4c	50696	68745.4	77272	16581.2	28835.4	21453.8	1.35603	1.52422	0.439392	0.608074	1.73904	1.29386	0.798291	0.371684
	0.234224	0.661071	1.26158	0.578487					79	1190007F08Rik	3225.41	10148.4	10849.9			3.14639	3.36387			1.6537	1.75012									Hist1h2bq	46504.2	54701.7	73535.1	14318	34328.5	21380.8	1.17627	1.58126	0.234224	0.661071	2.39758	1.49328	1.26158	0.578487
	0.185599	0.405807	1.00422	0.581802					80	1190007I07Rik	11308.2	19416.4	20656			1.71701	1.82663			0.779899	0.869184									Hist1h4j	51825.5	58940.6	68660	14262.2	28607.8	21346.4	1.13729	1.32483	0.185599	0.405807	2.00585	1.49672	1.00421	0.581802
	-0.0933	-0.190532	0.018368	-0.03796					81	1200011I18Rik	8821.55	12201.3	17846.9			1.38312	2.0231			0.467927	1.01657									Speer7-ps1	18523.5	17363.5	16231.9	21897.9	22178.4	21329.3	0.937376	0.876283	-0.0933004	-0.190532	1.01281	0.974034	0.018368	-0.037956
	0.382861	0.766496	0.83841	0.30933					82	1200011M11Rik	12072.7	22946.6	28112.6			1.9007	2.3286			0.926532	1.21947									Hist1h2bg	41131.4	53632.3	69970.1	17053.6	30493.2	21131.7	1.30393	1.70113	0.382861	0.766496	1.78808	1.23913	0.83841	0.30933
	0.159221	0.539807	0.553994	0.46225					83	1200014J11Rik	17136.3	30827.4	43498.3			1.79895	2.53837			0.847158	1.3439									Hist1h2an	44820.7	50050.6	65159.3	15322.9	22496.3	21110.2	1.11668	1.45378	0.159221	0.539807	1.46814	1.37769	0.553994	0.46225
	0.230708	0.452347	0.768504	0.27483					84	1200016B10Rik	17767.7	30535.4	33013.5			1.71859	1.85807			0.781229	0.893803									Hist1h3a	53586.4	62878.8	73320.4	17345.6	29548.3	20985.7	1.17341	1.36826	0.230708	0.452347	1.7035	1.20985	0.768504	0.27483
	0.435855	0.521445	0.513402	0.097114					85	1300001I01Rik	11089.2	20125	25995			1.81483	2.34417			0.859833	1.22908									Txnip	46388.3	62750	66585.4	19587.4	27959.3	20951.3	1.35271	1.43539	0.435855	0.521445	1.42741	1.06963	0.513402	0.0971139
	0.416352	0.8266	1.42892	0.832602					86	1300002E11Rik	11325.4	24952.3	28696.7			2.20321	2.53383			1.1396	1.34132									Hist1h2bc	40165.1	53602.3	71232.9	11513.7	31000	20504.6	1.33455	1.7735	0.416352	0.8266	2.69245	1.78089	1.42892	0.832602
	0.101071	0.504783	0.580012	0.639794					87	1300010F03Rik	12686.9	16354.2	23632.6			1.28907	1.86276			0.366328	0.897442									Hist1h2ag	45198.6	48478.7	64132.8	13124.1	19618.7	20448.8	1.07257	1.41891	0.101071	0.504783	1.49486	1.55811	0.580012	0.639794
	0.223198	0.448497	0.829996	0.594787					88	1300017J02Rik	28689.4	41091.8	43631.4			1.4323	1.52082			0.518334	0.604851									Hist1h2ah	46298.1	54044.6	63179.2	13437.6	23887.8	20294.2	1.16732	1.36462	0.223198	0.448497	1.77768	1.51025	0.829996	0.594787
	0.165033	0.664808	0.952942	0.75466					89	1300018I17Rik	15418.4	24935.1	25883.3			1.61723	1.67873			0.693526	0.747372									Hist1h2bl	38619	43299.3	61224.9	12020.4	23269.3	20281.3	1.12119	1.58536	0.165033	0.664808	1.93582	1.68723	0.952942	0.75466
	0.65192	0.747303	0.766975	0.445494					90	1300018J18Rik	9495.83	13300.7	24294.1			1.40069	2.55839			0.486138	1.35524									Srsf2	41595.3	65356.9	69824	14880.6	25322.2	20264.1	1.57126	1.67865	0.65192	0.747303	1.7017	1.36178	0.766975	0.445494
	0.65192	0.747303	0.766975	0.445494					91	1500001M20Rik	16681.1	37840.7	34276.3			2.26848	2.0548			1.18173	1.039									Srsf2	41595.3	65356.9	69824	14880.6	25322.2	20264.1	1.57126	1.67865	0.65192	0.747303	1.7017	1.36178	0.766975	0.445494
	0.387183	0.486564	0.893829	0.32479					92	1500002C15Rik	5441.53	3697.75	5459.3			0.679542	1.00327			-0.557365	0.00470363									H2afx	52229.2	68307.4	73178.6	16117.4	29947.8	20186.8	1.30784	1.4011	0.387183	0.486564	1.8581	1.25248	0.893829	0.32479
	0.553038	0.582939	0.488907	0.313426					93	1500002F19Rik	13060.5	29779.5	36612.9			2.28012	2.80333			1.18911	1.48714									Rps12	36999.8	54285.1	55421.9	16186.1	22715.3	20113.8	1.46717	1.4979	0.553038	0.582939	1.40338	1.24265	0.488907	0.313426
	0.175211	0.687878	0.59285	0.627726					94	1500002O20Rik	16895.8	35049.1	36260.7			2.07443	2.14614			1.05271	1.10174									Hist1h1b	45589.4	51476.4	73440.6	12948	19528.5	20006.4	1.12913	1.61091	0.175211	0.687878	1.50822	1.54513	0.59285	0.627726
	0.515719	0.619636	1.26521	0.626476					95	1500003O03Rik	4762.95	12630.7	15909.7			2.65187	3.3403			1.40701	1.73998									Hist2h2bb	47711.1	68212.9	73307.5	12656	30420.2	19538.2	1.42971	1.53649	0.515719	0.619636	2.40362	1.54379	1.26521	0.626476
	0.468744	0.515734	0.629975	0.287713					96	1500009L16Rik	6206.01	8112.71	19242.8			1.30723	3.10068			0.386518	1.63258									Rpl3	44331.1	61349.9	63381.1	15752.4	24377.4	19229	1.3839	1.42972	0.468744	0.515734	1.54754	1.2207	0.629975	0.287713
	0.580589	0.789665	0.682871	0.281939					97	1500010J02Rik	20275.8	42285.7	52647.2			2.08552	2.59655			1.06041	1.3766									Eif1	41475	62024.2	71696.8	15610.6	25060.3	18979.9	1.49546	1.72867	0.580589	0.789665	1.60533	1.21583	0.682871	0.281939
	0.643413	0.973792	1.18473	0.858858					98	1500011B03Rik	17024.6	31793.7	43451			1.86751	2.55224			0.901118	1.35177									Hist1h2bj	35814.5	55942.9	70339.4	10332.7	23488.4	18739.3	1.56202	1.964	0.643413	0.973792	2.27322	1.8136	1.18473	0.858858
	0.193715	0.509815	0.732054	0.639277					99	1500011H22Rik	8190.21	16762.2	15901.1			2.04662	1.94148			1.03324	0.957155									Hist1h2ak	47629.5	54474.1	67818.1	11904.5	19773.3	18541.8	1.14371	1.42387	0.193715	0.509815	1.661	1.55755	0.732054	0.639277
	0.33824	0.0493027	0.33443	-0.16198					100	1500011K16Rik	13348.3	26631.5	19105.4			1.99513	1.4313			0.996479	0.517326									6820431F20Rik	45980.3	58128.9	47578.8	20682.5	26078.1	18485.9	1.26421	1.03476	0.33824	0.0493027	1.26088	0.893796	0.33443	-0.161983
	0.23137	0.648075	0.896288	0.566028					101	1500012F01Rik	33396.5	55861.3	55190			1.67267	1.65257			0.742153	0.724711									Hist1h2ad	42879.4	50338.3	67195.3	12402.6	23084.7	18361.4	1.17395	1.56708	0.23137	0.648075	1.86127	1.48044	0.896288	0.566028
	0.340806	0.358938	0.411357	0.015509					102	1500026H17Rik	3414.38	4870.2	6816.6			1.42638	1.99644			0.512357	0.997429									Hist1h1a	48235.1	61087.9	61860.6	18084.3	24051	18279.8	1.26646	1.28248	0.340806	0.358938	1.32994	1.01081	0.411357	0.0155094
	0.215458	0.587234	0.741685	0.601859					103	1500031L02Rik	12961.8	22577.3	28945.9			1.74184	2.23318			0.800612	1.1591									Hist2h2ac	46813.5	54353.8	70330.9	12033.3	20121.2	18262.6	1.16107	1.50236	0.215458	0.587234	1.67213	1.51767	0.741685	0.601859
	0.329308	0.516953	1.25811	0.822795					104	1500032L24Rik	7103.62	12544.9	10613.6			1.76598	1.49412			0.820469	0.579292									Polr2a	59839.7	75183.2	85626.3	10208.1	24416	18056.4	1.25641	1.43093	0.329308	0.516953	2.39183	1.76883	1.25811	0.822795
	0.51062	0.270372	0.812761	0.20454					105	1600002H07Rik	13842.2	25175.6	25337.8			1.81876	1.83048			0.862953	0.872221									Klf2	48621.6	69269.4	58643.4	15464.6	27164.7	17820.2	1.42466	1.20612	0.51062	0.270372	1.75657	1.15232	0.812761	0.20454
	0.505806	0.576606	0.643406	0.317619					106	1600002K03Rik	19365.3	35723.4	35208.4			1.84471	1.81812			0.883394	0.862444									Gm3448	40641.8	57708	60610.6	14116.1	22049.6	17592.6	1.41992	1.49134	0.505806	0.576606	1.56201	1.24627	0.643406	0.317619
	0.475757	0.703028	1.01486	0.723804					107	1600012F09Rik	13490	23882.9	24800.9			1.77041	1.83847			0.824085	0.878502									Hist1h2ae	36596.1	50892.3	59575.5	10641.9	21504.2	17575.4	1.39065	1.62792	0.475757	0.703028	2.02071	1.65153	1.01486	0.723804
	0.349585	0.694734	0.321807	0.603312					108	1600012H06Rik	15762	33266.8	35852.7			2.11058	2.27463			1.07764	1.18563									Hist1h2bp	32842.4	41847.7	53158.3	11518	14396.2	17498.1	1.27419	1.61859	0.349585	0.694734	1.2499	1.5192	0.321807	0.603312
	0.823765	0.966577	0.862078	0.765532					109	1600014C10Rik	3719.31	4423.55	4170.71			1.18935	1.12137			0.25017	0.165258									Gt(ROSA)26Sor	35750	63278.2	69862.7	10285.4	18695.3	17485.2	1.77002	1.9542	0.823765	0.966577	1.81765	1.7	0.862078	0.765532
	0.726871	0.886209	0.543265	0.431643					110	1600020E01Rik	11578.8	19961.8	21772.8			1.72399	1.88039			0.785754	0.911035									Npm1	37579.6	62196	69458.9	12935.1	18850	17446.5	1.65505	1.84831	0.726871	0.886209	1.45727	1.34877	0.543265	0.431643
	0.513996	0.671815	0.192268	0.401355					111	1600021P15Rik	5858.13	9572.91	5661.17			1.63412	0.966378			0.708517	-0.04934									Hnrnpab	42252.4	60336.4	67311.3	13141.3	15014.7	17356.3	1.428	1.59308	0.513996	0.671815	1.14256	1.32075	0.192268	0.401355
	-0.13472	0.0975661	0.160649	0.253959					112	1600029D21Rik	3564.7	7142.1	8208.27			2.00356	2.30265			1.00257	1.2033									Gm10807	15371.1	14000.8	16446.6	14446.8	16148.5	17227.5	0.910847	1.06997	-0.13472	0.0975661	1.11779	1.19247	0.160649	0.253959
	0.181385	0.630387	0.964032	0.793627					113	1700001G11Rik	20082.5	39605.8	43665.8			1.97215	2.17431			0.97977	1.12056									Hist1h2bf	35256.1	39979.4	54575.8	9916.09	19343.9	17188.8	1.13397	1.54798	0.181385	0.630387	1.95075	1.73343	0.964032	0.793627
	-0.00997	0.65459	0.950601	0.49987					114	1700001G17Rik	15332.5	30483.8	26708			1.98819	1.74192			0.991453	0.800682									Hist1h2af	41294.6	41010.2	65004.7	12097.7	23381	17107.2	0.993111	1.57417	-0.00997246	0.65459	1.93268	1.41409	0.950601	0.49987
	0.540947	0.649071	0.422785	0.27159					115	1700001L05Rik	11437.1	27061	29349.6			2.36607	2.56618			1.24249	1.35962									Prdx1	42102.1	61255.4	66022.7	14129	18940.2	17055.7	1.45493	1.56816	0.540947	0.649071	1.34051	1.20714	0.422785	0.27159
	0.257447	0.582313	1.00701	0.597838					116	1700001P01Rik	8074.25	9774.76	13701.9			1.21061	1.69699			0.275733	0.762979									Hist1h2al	33168.8	39648.8	49662	11170.1	22449	16905.3	1.19536	1.49725	0.257447	0.582313	2.00974	1.51345	1.00701	0.597838
	0.024691	0.751708	0.906053	0.909481					117	1700003D09Rik	12991.8	23801.3	22047.7			1.83202	1.69704			0.873437	0.763022									Hist1h2bh	32795.2	33361.3	55220.1	8881.11	16642.4	16682	1.01726	1.68379	0.0246913	0.751708	1.87391	1.87837	0.906053	0.909481
	0.258395	0.323138	0.800335	0.412602					118	1700003G18Rik	10539.5	26382.4	30243			2.5032	2.8695			1.32377	1.5208									Tcte3	45821.4	54809.1	57324.8	12471.3	21718.9	16600.4	1.19615	1.25105	0.258395	0.323138	1.7415	1.33108	0.800335	0.412602
	0.543062	0.896821	0.822338	0.547921					119	1700006E09Rik	3977	6854.36	14612.5			1.7235	3.67426			0.785341	1.87745									Hist1h2bb	32434.4	47259	60391.6	11354.8	20078.3	16600.4	1.45706	1.86196	0.543062	0.896821	1.76827	1.46198	0.822338	0.547921
	0.355847	0.0109383	0.046969	-0.57399					120	1700007I08Rik	4870.32	6240.21	8367.2			1.28127	1.718			0.357578	0.780728									Gm17279	17746.2	22710.4	17881.2	24577.7	25391	16510.2	1.27974	1.00761	0.355847	0.0109383	1.03309	0.671757	0.0469685	-0.573989
	0.286828	0.217814	0.667223	0.156196					121	1700007K13Rik	5720.69	8890.05	9685.85			1.55402	1.69313			0.636002	0.759689									Neat1	46074.8	56209.2	53583.6	14777.5	23466.9	16467.2	1.21996	1.16297	0.286828	0.217814	1.58801	1.11435	0.667223	0.156196
	0.410727	0.689887	1.12969	0.867242					122	1700007L15Rik	18154.2	34808.6	35818.3			1.91739	1.97301			0.939143	0.980396									Sox2	35921.8	47752.9	57947.6	9001.35	19696	16420	1.32936	1.61316	0.410727	0.689887	2.18812	1.82417	1.12969	0.867242
	0.913404	1.23806	0.641711	0.870935					123	1700009P17Rik	12369.1	16740.8	19315.9			1.35344	1.56163			0.43663	0.643049									Sqstm1	27250.6	51326.1	64278.8	8971.29	13996.8	16407.1	1.88348	2.3588	0.913404	1.23806	1.56018	1.82885	0.641711	0.870935
	0.714518	0.692902	0.954645	0.469137					124	1700010K24Rik	7348.43	11518.4	18134.7			1.56747	2.46783			0.648434	1.30324									1110038B12Rik	37334.8	61264	60352.9	11840	22947.2	16389.9	1.64094	1.61653	0.714518	0.692902	1.9381	1.38428	0.954645	0.469137
	0.249603	0.652895	0.748956	0.515996					125	1700011J10Rik	14031.2	22822.1	22842.3			1.62653	1.62797			0.701797	0.703072									Hist1h2ab	35625.5	42354.4	56014.7	11410.6	19176.4	16316.9	1.18888	1.57232	0.249603	0.652895	1.68058	1.42998	0.748956	0.515996
	0.84422	0.86963	1.4727	1.2674					126	1700012A16Rik	8516.62	14675	14329			1.7231	1.68248			0.78501	0.750589									Mat2a	32421.5	58206.2	59240.4	6763.9	18772.7	16282.6	1.79529	1.82719	0.84422	0.86963	2.77542	2.40727	1.47271	1.2674
	0.33703	0.768917	0.602537	0.960823					127	1700016H13Rik	8293.29	11509.8	14900.3			1.38785	1.79667			0.472849	0.845326									Obfc2a	33959.1	42895.6	57866	8219.75	12480.7	15999.1	1.26315	1.70399	0.33703	0.768917	1.51838	1.94642	0.602537	0.960823
	0.47417	0.516779	0.595614	0.75729					128	1700017B05Rik	19043.2	33863.8	40216.7			1.77826	2.11186			0.830467	1.07852									Nop56	38958.3	54117.6	55739.8	9160.25	13842.2	15483.7	1.38912	1.43076	0.47417	0.516779	1.51112	1.69031	0.595614	0.75729
	0.493629	0.593996	0.64393	0.261264					129	1700017J07Rik	8666.94	9671.69	11670.3			1.11593	1.34653			0.158245	0.429242									Gm3435	35251.8	49634	53209.9	12750.5	19923.7	15281.8	1.40798	1.50942	0.493629	0.593996	1.56258	1.19853	0.64393	0.261264
	0.999442	0.986917	1.08691	1.16069					130	1700018A14Rik	5145.19	4591.04	12636.7			0.892297	2.45602			-0.164403	1.29632									Drg1	29621.3	59219.8	58707.8	6751.02	14340.4	15092.8	1.99923	1.98194	0.999442	0.986917	2.12418	2.23564	1.08691	1.16069
	0.814958	0.642728	1.25698	0.751509					131	1700018B08Rik	4659.87	18312.6	11970.9			3.92986	2.56894			1.97448	1.36117									Nanog	28779.5	50630.3	44932.9	8924.05	21328.1	15024.1	1.75925	1.56128	0.814958	0.642728	2.38995	1.68355	1.25698	0.751509
	0.460964	0.623164	0.194021	0.549091					132	1700018M17Rik	18738.3	34280.4	35457.5			1.82943	1.89225			0.871394	0.920102									Tob1	40929.6	56338	63041.8	10268.2	11746.3	15024.1	1.37646	1.54025	0.460964	0.623164	1.14395	1.46316	0.194021	0.549091
	0.402832	0.642127	0.859232	0.532255					133	1700019A02Rik	4741.48	4492.27	11812			0.94744	2.49121			-0.0778928	1.31685									Eif4a1	43970.3	58133.2	68621.3	10341.2	18759.8	14955.4	1.3221	1.56063	0.402832	0.642127	1.81407	1.44619	0.859232	0.532255
	0.523253	0.61852	0.078563	-0.05909					134	1700019E19Rik	3839.56	8267.32	9329.34			2.15319	2.42979			1.10648	1.28083									Gm10382	27504	39528.5	42226.9	15365.9	16225.8	14749.2	1.43719	1.5353	0.523253	0.61852	1.05597	0.95987	0.0785629	-0.0590889
	0.800774	1.02283	0.647106	0.930832					135	1700019N12Rik	4140.2	6811.41	5601.04			1.64519	1.35284			0.718253	0.435994									Skp1a	27242	47456.5	55353.2	7687.23	12038.4	14654.7	1.74204	2.03191	0.800774	1.02283	1.56602	1.90637	0.647106	0.930832
	0.561876	0.490677	0.928263	0.178287					136	1700020I14Rik	11046.3	24771.9	29959.5			2.24256	2.71219			1.16515	1.43946									Ptma	36939.7	54529.9	51904.1	12909.4	24566.4	14607.5	1.47619	1.4051	0.561876	0.490677	1.90298	1.13154	0.928263	0.178287
	0.677212	1.0099	0.549823	0.15189					137	1700020O03Rik	12957.5	27988.6	31059.1			2.16004	2.39701			1.11106	1.26123									Gnb2l1	28195.5	45085.9	56779.2	12935.1	18935.8	14371.3	1.59905	2.01377	0.677212	1.0099	1.46391	1.11102	0.549823	0.15189
	0.877641	1.04788	0.743585	0.642123					138	1700021C14Rik	19940.8	32218.9	33997.1			1.61573	1.7049			0.692183	0.769687									Rps6	26494.7	48680.5	54777.7	9095.83	15229.4	14195.2	1.83737	2.06749	0.877641	1.04788	1.67433	1.56062	0.743585	0.642123
	0.691155	0.83541	0.836276	0.596124					139	1700021F05Rik	17140.6	34100	32364.9			1.98943	1.8882			0.992354	0.917012									Map2k2	40375.6	65189.4	72044.7	9362.1	16715.4	14152.2	1.61458	1.78436	0.691155	0.83541	1.78544	1.51165	0.836276	0.596124
	0.326167	-0.235357	0.40601	-0.40158					140	1700021J08Rik	3414.38	3362.76	4591.65			0.984882	1.3448			-0.0219778	0.427389									Gm10060	17080.5	21413.4	14509.4	18569.6	24605	14057.7	1.25368	0.849475	0.326167	-0.235357	1.32502	0.757029	0.40601	-0.401579
	0.326167	-0.235357	0.40601	-0.40158					141	1700021K19Rik	8989.05	24698.9	20617.3			2.74766	2.2936			1.45821	1.19762									Gm10060	17080.5	21413.4	14509.4	18569.6	24605	14057.7	1.25368	0.849475	0.326167	-0.235357	1.32502	0.757029	0.40601	-0.401579
	0.450242	0.431329	0.633916	0.357823					142	1700022K14Rik	8413.54	18355.6	19315.9			2.18167	2.29581			1.12543	1.199									Snhg12	37038.5	50604.6	49945.5	10929.6	16960.2	14006.2	1.36627	1.34848	0.450242	0.431329	1.55177	1.28149	0.633916	0.357823
	0.470716	0.773645	-0.05637	0.183793					143	1700022N22Rik	10251.7	20773.5	21149.9			2.02634	2.06306			1.01888	1.04479									Hspa5	31523.9	43685.8	53892.8	12308.1	11836.5	13980.4	1.3858	1.70958	0.470716	0.773645	0.961681	1.13587	-0.0563689	0.183793
	0.291553	0.236305	0.041987	-0.27604					144	1700023H06Rik	14830	17994.8	27318			1.21341	1.84208			0.279065	0.881332									Ier2	51099.7	62543.9	60194	16907.6	17406.9	13963.2	1.22396	1.17797	0.291553	0.236305	1.02953	0.825855	0.0419874	-0.276039
	0.323294	0.509539	0.563381	0.161135					145	1700023L04Rik	3994.18	12776.8	11519.9			3.19884	2.88418			1.67755	1.52816									Rpl10a	40671.9	50888	57900.3	12479.9	18442	13954.6	1.25118	1.4236	0.323294	0.509539	1.47773	1.11817	0.563381	0.161135
	0.527801	0.498718	0.770595	0.188382					146	1700024N20Rik	9740.64	19476.5	13212.3			1.99951	1.35641			0.999647	0.43979									Snhg3	40783.6	58798.9	57625.4	12235.1	20872.8	13941.8	1.44173	1.41296	0.527801	0.498718	1.70597	1.13949	0.770595	0.188382
	0.541572	0.511418	0.696313	0.316447					147	1700025E21Rik	10045.6	15224.8	17872.6			1.51557	1.77916			0.599859	0.831193									Rpl18a	33173.2	48285.4	47286.7	11195.9	18141.3	13941.8	1.45556	1.42545	0.541572	0.511418	1.62036	1.24526	0.696313	0.316447
	0.464857	0.460146	0.549364	-0.12473					148	1700025G04Rik	7412.85	21280.3	21648.2			2.87073	2.92036			1.52142	1.54615									Rps20	41286.1	56982.2	56796.4	15172.6	22204.2	13916	1.38018	1.37568	0.464857	0.460146	1.46344	0.917178	0.549364	-0.124726
	0.482892	0.388765	0.844653	0.34064					149	1700025K23Rik	5467.3	13665.8	13951.1			2.49955	2.55173			1.32167	1.35147									Rpl13	40401.3	56462.6	52896.3	10826.5	19442.6	13709.8	1.39754	1.30927	0.482892	0.388765	1.79583	1.26632	0.844653	0.34064
	0.847426	0.971058	0.946564	0.484691					150	1700026J14Rik	4771.54	5531.59	6391.37			1.15929	1.33948			0.213239	0.42167									Rpl32	25704.5	46249.7	50387.9	9727.13	18746.9	13611	1.79929	1.96028	0.847426	0.971058	1.92728	1.39929	0.946564	0.484691
	0.382243	1.09266	1.20289	1.41125					151	1700028E10Rik	10792.9	15662.8	18061.6			1.45122	1.67348			0.537265	0.74285									Hist3h2a	28311.4	36900.2	60378.7	5093.32	11724.9	13546.6	1.30337	2.13266	0.382243	1.09266	2.30201	2.65968	1.20289	1.41125
	0.382243	1.09266	1.20289	1.41125					152	1700028I16Rik	7941.11	11913.5	18104.6			1.50023	2.27986			0.585187	1.18894									Trim17	28311.4	36900.2	60378.7	5093.32	11724.9	13546.6	1.30337	2.13266	0.382243	1.09266	2.30201	2.65968	1.20289	1.41125
	0.235611	0.518733	0.639115	0.748013					153	1700028N14Rik	4415.07	11355.2	16880.4			2.57192	3.82337			1.36285	1.93484									Rps5	28586.3	33657.6	40955.5	8060.85	12553.8	13538	1.17741	1.4327	0.235611	0.518733	1.55737	1.67948	0.639115	0.748013
	0.439779	0.442326	0.320604	0.143189					154	1700029F09Rik	19300.9	38764.1	41608.3			2.00841	2.15577			1.00605	1.1082									Snhg9	38739.2	52545.8	52638.6	12239.4	15285.3	13516.5	1.3564	1.35879	0.439779	0.442326	1.24885	1.10434	0.320604	0.143189
	0.334113	0.520723	0.81869	0.177931					155	1700029G01Rik	9392.76	12935.7	15604.7			1.3772	1.66136			0.461734	0.732363									Hsp90ab1	43321.8	54611.5	62152.6	11921.6	21027.4	13486.5	1.2606	1.43467	0.334113	0.520723	1.7638	1.13126	0.81869	0.177931
	0.268729	0.436812	0.106162	-0.12167					156	1700029I01Rik	7112.21	4711.3	3913			0.662424	0.550181			-0.594173	-0.862023									Ddx3x	45868.6	55260	62088.2	14635.8	15753.4	13452.1	1.20475	1.35361	0.268729	0.436812	1.07636	0.919125	0.106162	-0.121667
	0.433333	0.522512	0.646377	0.314058					157	1700029J07Rik	7009.14	10157	11038.9			1.44911	1.57492			0.535164	0.655282									Srsf3	36441.5	49208.8	52346.5	10813.6	16925.9	13443.5	1.35035	1.43645	0.433333	0.522512	1.56523	1.2432	0.646377	0.314058
	0.466248	0.746031	0.476626	0.38553					158	1700029P11Rik	7086.44	8129.89	6850.97			1.14725	0.966772			0.198175	-0.0487528									Hjurp	38958.3	53821.3	65339.7	10281.1	14306	13430.6	1.38151	1.67717	0.466248	0.746031	1.39149	1.30634	0.476626	0.38553
	0.344836	0.626244	0.576612	0.062445					159	1700030C10Rik	15749.1	32038.5	30238.7			2.03431	1.92003			1.02454	0.94113									RP24-201C14.6	36437.2	46275.5	56242.3	12754.8	19021.8	13319	1.27001	1.54354	0.344836	0.626244	1.49134	1.04423	0.576612	0.0624445
	0.541264	0.951609	0.482159	1.01327					160	1700030C12Rik	14177.2	27146.9	38021.8			1.91483	2.6819			0.937215	1.42326									Nufip2	32318.5	47031.4	62504.9	6592.12	9208.09	13306.1	1.45525	1.93403	0.541264	0.951609	1.39683	2.01848	0.482159	1.01327
	0.354853	0.438391	0.833744	0.091353					161	1700030J22Rik	5475.89	19334.8	13921			3.53089	2.54223			1.82003	1.3461									Snhg5	39808.6	50909.5	53944.4	12441.3	22174.2	13254.5	1.27886	1.35509	0.354853	0.438391	1.7823	1.06537	0.833744	0.0913528
	0.742153	0.724711	0.767771	0.419291					162	1700030K09Rik	8868.79	15701.5	11318			1.77042	1.27617			0.82409	0.351816									1500012F01Rik	33396.5	55861.3	55190	9860.26	16788.5	13185.8	1.67267	1.65257	0.742153	0.724711	1.70264	1.33727	0.767771	0.419291
	0.830596	0.910749	0.42277	-0.01499					163	1700031A10Rik	7137.98	10169.9	15308.4			1.42475	2.14463			0.510713	1.10073									Rpl12	28517.6	50716.2	53613.6	13145.6	17621.6	13009.7	1.77842	1.88002	0.830596	0.910749	1.3405	0.989666	0.42277	-0.0149868
	0.818695	0.992072	0.242341	0.122797					164	1700034F02Rik	10264.6	26532.7	28305.9			2.58487	2.75762			1.37009	1.46342									Rpl23	28444.6	50170.8	56577.4	11908.8	14087	12966.8	1.76381	1.98904	0.818695	0.992072	1.18291	1.08884	0.242341	0.122797
	0.366333	0.757291	-0.5426	0.561069					165	1700034H14Rik	7185.22	14541.9	12774.1			2.02386	1.77784			1.01711	0.830123									Phf10	21718.9	27997.2	36711.7	8739.39	5999.86	12893.8	1.28907	1.69031	0.366333	0.757291	0.686531	1.47536	-0.542604	0.561069
	0.617108	0.622774	0.559491	0.78867					166	1700037C18Rik	5170.96	4131.51	5910.3			0.798983	1.14298			-0.323763	0.192799									Rbm14	33130.2	50815	51015	7416.67	10930.3	12812.2	1.5338	1.53983	0.617108	0.622774	1.47375	1.72748	0.559491	0.78867
	0.341393	0.412364	0.158396	0.121225					167	1700037H04Rik	15736.2	32704.2	37386.1			2.07828	2.3758			1.05539	1.24841									Srsf7	41659.7	52782	55443.4	11775.6	13142.1	12807.9	1.26698	1.33086	0.341393	0.412364	1.11605	1.08766	0.158396	0.121225
	0.342067	0.754096	0.716092	-0.00998					168	1700039M10Rik	16625.2	28929.2	32081.4			1.74008	1.92968			0.79915	0.948364									RP24-201C14.5	39770	50411.3	67075	12857.9	21121.9	12769.2	1.26757	1.68657	0.342067	0.754096	1.64273	0.993106	0.716092	-0.00998015
	0.539122	0.685072	0.808677	0.684689					169	1700040I03Rik	13468.5	34383.4	36213.5			2.55287	2.68875			1.35212	1.42693									9030025P20Rik	29913.4	43466.8	48094.2	7914.84	13863.7	12722	1.45309	1.60778	0.539122	0.685072	1.7516	1.60736	0.808677	0.684689
	0.577031	0.547587	0.415131	0.801934					170	1700045H11Rik	6944.71	12252.8	11137.6			1.76434	1.60376			0.819126	0.681459									Hspa8	23080.3	34430.7	33735.1	7292.13	9723.47	12713.4	1.49178	1.46164	0.577031	0.547587	1.33342	1.74344	0.415131	0.801934
	0.995232	1.00305	0.404052	0.268496					171	1700047I17Rik2	13902.3	16951.2	29018.9			1.21931	2.08734			0.286064	1.06167									Gpr19	28848.3	57506.2	57818.7	10525.9	13928.1	12679	1.9934	2.00423	0.995232	1.00305	1.32322	1.20455	0.404052	0.268496
	0.539869	0.474957	0.790409	0.056562					172	1700047K16Rik	10170.1	18733.5	25140.2			1.84202	2.47197			0.881285	1.30566									Rcc1	37291.9	54216.4	51831.1	12175	21057.5	12661.8	1.45384	1.38988	0.539869	0.474957	1.72957	1.03998	0.790409	0.0565618
	0.443108	0.673826	0.316406	0.180648					173	1700049G17Rik	4724.3	6798.53	11601.5			1.43906	2.45572			0.525122	1.29614									Rabggtb	33838.8	46004.9	53983	11054.1	13764.9	12528.7	1.35953	1.5953	0.443108	0.673826	1.24522	1.13339	0.316406	0.180648
	0.494024	0.550153	0.973102	0.39911					174	1700049J03Rik	15113.5	24505.6	26785.3			1.62144	1.77228			0.697279	0.825611									Caprin2	43347.6	61049.3	63471.3	9383.57	18420.5	12374.1	1.40837	1.46424	0.494024	0.550153	1.96306	1.31869	0.973102	0.39911
	0.35366	0.633627	0.854157	0.681863					175	1700051A21Rik	4505.26	8975.94	14921.8			1.99232	3.31208			0.994453	1.72774									2210404J11Rik	27546.9	35199.4	42738	7700.11	13919.5	12352.6	1.2778	1.55146	0.35366	0.633627	1.8077	1.60421	0.854157	0.681863
	0.250411	0.673583	0.934925	0.673731					176	1700052N19Rik	8495.14	20558.8	22447.1			2.42006	2.64235			1.27505	1.40182									Hist1h2bm	30403	36165.8	48493.7	7730.17	14778.5	12331.1	1.18955	1.59503	0.250411	0.673583	1.91179	1.59519	0.934925	0.673731
	0.475226	0.339851	0.763157	-0.07926					177	1700054N08Rik	5896.78	5492.93	7143.04			0.931513	1.21135			-0.102351	0.276611									Calr	45263.1	62921.8	57286.1	12986.7	22041	12292.5	1.39014	1.26563	0.475226	0.339851	1.6972	0.946543	0.763157	-0.0792601
	0.443393	0.438844	0.022629	-0.02976					178	1700055D18Rik	6476.58	13296.4	10768.3			2.053	1.66265			1.03773	0.733481									2700023E23Rik	32739.4	44519	44378.8	12548.6	12747	12292.5	1.3598	1.35552	0.443393	0.438844	1.01581	0.979585	0.022629	-0.0297574
	0.703706	0.772035	0.889046	0.752726					179	1700063H04Rik	3521.75	5789.27	6434.32			1.64386	1.82702			0.717089	0.869495									Fkbp4	35767.2	58253.4	61078.8	7274.95	13472.9	12258.1	1.62868	1.70768	0.703706	0.772035	1.85195	1.68497	0.889046	0.752726
	0.511374	0.464254	0.327497	0.438002					180	1700064E03Rik	7064.97	15259.1	17662.2			2.15983	2.49996			1.11091	1.32191									Rps15	31566.9	44995.7	43549.8	9035.71	11338.3	12240.9	1.42541	1.3796	0.511374	0.464254	1.25483	1.35473	0.327497	0.438002
	0.911285	1.23293	1.42499	1.52984					181	1700064H15Rik	3633.41	7451.32	5420.64			2.05078	1.49189			1.03617	0.577139									Appbp2	25141.8	47284.8	59094.4	4225.83	11346.9	12202.3	1.88072	2.35044	0.911285	1.23293	2.68513	2.88754	1.42499	1.52984
	0.643804	0.944041	0.684425	0.717944					182	1700065D16Rik	14559.4	27151.2	24349.9			1.86485	1.67245			0.89906	0.741964									Ppia	27976.4	43711.6	53824.1	7408.08	11905.2	12185.1	1.56244	1.92391	0.643804	0.944041	1.60706	1.64484	0.684425	0.717944
	0.913943	1.07587	0.539084	0.414188					183	1700066B19Rik	4062.89	14967.1	12692.5			3.68385	3.12402			1.88121	1.6434									Vdac1	31163.2	58717.3	65691.9	9082.95	13198	12103.5	1.88419	2.108	0.913943	1.07587	1.45305	1.33255	0.539084	0.414188
	0.764591	0.771258	0.768119	0.219067					184	1700066M21Rik	21164.8	44884	42364.3			2.12069	2.00164			1.08453	1.00118									2610019E17Rik	28088.1	47718.5	47939.6	10379.9	17677.5	12082	1.69889	1.70676	0.764591	0.771258	1.70305	1.16398	0.768119	0.219067
	0.466348	0.619187	0.577873	0.257157					185	1700067K01Rik	9860.89	17930.4	10012.3			1.81834	1.01535			0.862619	0.0219822									Ncl	38880.9	53718.2	59721.5	10087.9	15057.6	12056.2	1.38161	1.53601	0.466348	0.619187	1.49265	1.19512	0.577873	0.257157
	0.464083	0.557972	0.685524	0.465862					186	1700069B07Rik	10316.1	19017	25093			1.84342	2.4324			0.882384	1.28238									Smg5	45237.3	62402.1	66598.2	8713.62	14014	12034.8	1.37944	1.4722	0.464083	0.557972	1.60829	1.38114	0.685524	0.465862
	0.658172	0.942032	0.693392	0.605919					187	1700082M22Rik	8237.45	19639.7	17541.9			2.3842	2.12953			1.2535	1.09054									Gm11974	25124.7	39648.8	48270.3	7893.36	12764.2	12013.3	1.57808	1.92123	0.658172	0.942032	1.61708	1.52195	0.693392	0.605919
	0.654088	0.492476	1.18169	0.381216					188	1700084C06Rik	23819	39163.5	42669.3			1.64421	1.79139			0.717393	0.841082									Fgf4	37403.5	58859	52621.4	9220.38	20915.8	12009	1.57362	1.40686	0.654088	0.492476	2.26843	1.30244	1.18169	0.381216
	0.725808	1.11004	-0.28241	0.616499					189	1700084E18Rik	5432.94	8988.83	10811.2			1.65451	1.98994			0.7264	0.992723									Chka	23823.3	39399.7	51423	7751.64	6373.51	11884.4	1.65383	2.15852	0.725808	1.11004	0.822214	1.53315	-0.282413	0.616499
	0.493458	0.709512	0.226815	0.369995					190	1700086O06Rik	17488.5	29831	29057.5			1.70575	1.66152			0.77041	0.732508									Rplp0	32717.9	46060.8	53502	9186.02	10749.9	11871.5	1.40782	1.63525	0.493458	0.709512	1.17025	1.29235	0.226815	0.369995
	0.364291	0.490158	0.399889	0.087081					191	1700086P04Rik	12523.7	24093.3	21674			1.92382	1.73064			0.943975	0.791304									Gm3417	27418.1	35293.9	38511.4	11135.7	14692.6	11828.6	1.28725	1.4046	0.364291	0.490158	1.31941	1.06222	0.399889	0.0870807
	1.10259	1.23115	0.574486	0.520003					192	1700088E04Rik	5746.46	10668.1	11034.6			1.85646	1.92024			0.892552	0.941284									Rpl26	20417.5	43844.7	47931	8236.93	12266	11811.4	2.1474	2.34754	1.10259	1.23115	1.48915	1.43396	0.574486	0.520003
	0.931498	1.27148	0.909161	1.15183					193	1700092M07Rik	5158.07	8920.11	9518.33			1.72935	1.84533			0.79023	0.883877									Rapgef6	23350.9	44536.1	56371.2	5308.05	9968.27	11794.2	1.90726	2.41409	0.931498	1.27148	1.87795	2.22195	0.909161	1.15183
	0.592311	0.944954	0.273112	0.860522					194	1700093J21Rik	29922	46258.3	52642.9			1.54597	1.75934			0.628508	0.815034									Dynll2	29574.1	44587.7	56933.9	6493.34	7846.63	11789.9	1.50766	1.92513	0.592311	0.944954	1.20841	1.8157	0.273112	0.860522
	0.577696	0.818209	0.565199	0.304967					195	1700094D03Rik	3195.34	3985.49	3517.83			1.24728	1.10093			0.318788	0.138716									Trim28	32640.6	48714.9	57552.4	9529.58	14099.9	11772.8	1.49246	1.76322	0.577696	0.818209	1.47959	1.23539	0.565199	0.304967
	0.670013	1.03985	0.574316	0.878442					196	1700095J07Rik	5755.05	10874.2	9999.4			1.88951	1.7375			0.918009	0.797013									Ppp2ca	22552.1	35882.3	46367.5	6368.8	9482.96	11708.3	1.59109	2.05602	0.670013	1.03985	1.48897	1.83839	0.574316	0.878442
	0.683224	0.481521	1.1232	0.689767					197	1700101E01Rik	3122.33	5630.36	6984.12			1.80326	2.23683			0.850604	1.16146									Dppa5a	30557.6	49067.1	42665	7232	15753.4	11665.4	1.60572	1.39622	0.683224	0.481521	2.17829	1.61302	1.1232	0.689767
	0.728981	0.942725	0.765469	0.348387					198	1700101I11Rik	5415.76	9624.44	15368.5			1.77712	2.83774			0.829539	1.50474									Rpl27a	27512.6	45601.2	52883.4	9155.96	15564.4	11656.8	1.65747	1.92215	0.728981	0.942725	1.69992	1.27314	0.765469	0.348387
	0.524589	0.533313	1.01013	0.597974					199	1700102P08Rik	10183	12592.1	21639.6			1.23658	2.12507			0.306355	1.08751									Rpl10	31700	45601.2	45877.8	7687.23	15482.8	11635.3	1.43852	1.44725	0.524589	0.533313	2.0141	1.51359	1.01013	0.597974
	0.564327	1.04783	0.170427	0.460608					200	1700104B16Rik	9744.93	21168.6	17219.8			2.17227	1.76705			1.1192	0.821341									Kpna2	22114	32699.9	45718.9	8430.18	9487.25	11601	1.4787	2.06742	0.564327	1.04783	1.12539	1.37612	0.170427	0.460608
	-0.16395	-0.841228	-0.11855	-0.7743					201	1700106N22Rik	12098.5	22096.3	19363.1			1.82637	1.60046			0.868977	0.678483									Gm15319	16075.5	14348.6	8972.83	19746.3	18188.6	11545.1	0.892578	0.558168	-0.16395	-0.841228	0.921113	0.584673	-0.11855	-0.774298
	0.604702	0.761342	0.65883	0.34021					202	1700108N11Rik	4269.05	4402.08	3990.31			1.03116	0.934707			0.0442703	-0.0974142									Rps9	32571.9	49530.9	55211.5	9113.01	14387.6	11536.5	1.52066	1.69507	0.604702	0.761342	1.5788	1.26594	0.65883	0.34021
	0.583447	0.740226	0.795273	0.419162					203	1700112J16Rik	4625.52	10964.4	7572.57			2.37041	1.63713			1.24514	0.711167									Rpl7a	30699.3	46000.6	51281.3	8614.85	14950.3	11519.4	1.49842	1.67044	0.583447	0.740226	1.73541	1.33715	0.795273	0.419162
	-0.40548	-0.378219	-0.57342	-0.36353					204	1700113A16Rik	7137.98	15289.2	19676.7			2.14195	2.75661			1.09892	1.4629									Dux	13515.8	10204.2	10398.9	14820.5	9959.68	11519.4	0.754986	0.769387	-0.405477	-0.378219	0.672022	0.77726	-0.573419	-0.363531
	0.416397	0.900057	1.24914	1.38824					205	1700120B22Rik	15491.4	30685.7	27541.3			1.98082	1.77785			0.986099	0.83013									Top2a	24411.7	32579.7	45555.7	4376.14	10402	11454.9	1.33459	1.86614	0.416397	0.900057	2.37699	2.61759	1.24914	1.38824
	0.622399	0.697559	0.302155	0.136427					206	1700122E12Rik	16582.3	35409.9	30874.4			2.1354	1.86189			1.09451	0.896771									Eef2	31120.2	47907.5	50469.5	10362.7	12777.1	11390.5	1.53943	1.62176	0.622399	0.697559	1.23299	1.09918	0.302155	0.136427
	0.690424	0.933122	0.88409	0.930705					207	1700123M08Rik	11488.6	20576	25982.1			1.79098	2.26155			0.840752	1.17731									Cdk1	25588.5	41293.6	48858.8	5892.11	10874.5	11231.6	1.61376	1.9094	0.690424	0.933122	1.8456	1.90621	0.88409	0.930705
	0.462636	0.770374	0.601318	0.264203					208	1700123O20Rik	13107.8	20356.9	22223.8			1.55304	1.69546			0.635097	0.761681									Mybl2	25013	34469.3	42665	9344.92	14177.2	11223	1.37806	1.70571	0.462636	0.770374	1.5171	1.20097	0.601318	0.264203
	0.741101	0.812042	0.750451	0.404937					209	1700125D06Rik	3100.86	3087.9	4359.71			0.995821	1.40597			-0.00604236	0.491564									Tm7sf3	34710.7	58017.2	60941.4	8473.13	14254.5	11218.7	1.67145	1.75569	0.741101	0.812042	1.68232	1.32403	0.750451	0.404937
	0.765306	0.779817	1.09001	0.376028					210	1700125G22Rik	6614.01	8563.65	11038.9			1.29477	1.66901			0.372701	0.738994									Taf1d	30141	51231.6	51749.5	8614.85	18338.9	11180	1.69973	1.71691	0.765306	0.779817	2.12875	1.29776	1.09001	0.376028
	0.97021	1.06137	1.50498	1.10146					211	1810006K21Rik	6291.9	17608.3	13886.6			2.79857	2.20706			1.48469	1.14213									Wnk1	25562.7	50080.6	53347.3	5196.39	14748.4	11150	1.95913	2.08692	0.97021	1.06137	2.8382	2.14571	1.50498	1.10146
	0.97021	1.06137	1.50498	1.10146					212	1810008A18Rik	12845.8	24793.4	25088.7			1.93008	1.95307			0.948658	0.965743									Wnk1	25562.7	50080.6	53347.3	5196.39	14748.4	11150	1.95913	2.08692	0.97021	1.06137	2.8382	2.14571	1.50498	1.10146
	0.553035	0.688724	0.472201	-0.00316					213	1810009A15Rik	23896.3	36741.2	39727			1.53753	1.66247			0.62061	0.73333									Rpl41	28745.2	42174.1	46333.1	11148.6	15465.6	11124.2	1.46717	1.61186	0.553035	0.688724	1.38722	0.99781	0.472201	-0.00316355
	0.746222	0.814808	0.766574	0.389775					214	1810010H24Rik	8349.12	15826	16597			1.89553	1.98787			0.922602	0.991222									Med21	34964.1	58648.6	61504.1	8477.42	14422	11107	1.67739	1.75906	0.746222	0.814808	1.70123	1.31019	0.766574	0.389775
	0.914097	1.08694	0.861185	1.12911					215	1810011O10Rik	4084.37	8074.05	11459.8			1.97682	2.80577			0.983179	1.4884									Rab10	18321.7	34525.2	38919.5	5076.15	9220.98	11102.7	1.88439	2.12423	0.914097	1.08694	1.81653	2.18723	0.861185	1.12911
	0.284707	0.389228	0.467394	-0.37106					216	1810012K08Rik	3401.49	5961.06	6026.27			1.75248	1.77166			0.809402	0.825098									Actb	43343.3	52799.2	56766.4	14348.1	19837.8	11094.1	1.21816	1.30969	0.284707	0.389228	1.38261	0.773215	0.467394	-0.371059
	0.726511	0.841142	0.888234	0.538914					217	1810012P15Rik	15555.8	34941.8	41672.8			2.24622	2.67892			1.1675	1.42165									Rps4y2	26975.7	44634.9	48326.2	7627.1	14117.1	11081.2	1.65463	1.79147	0.726511	0.841142	1.85091	1.45288	0.888234	0.538914
	0.666536	0.979188	0.413103	1.26759					218	1810013D10Rik	11664.7	21520.8	25329.2			1.84495	2.17144			0.883579	1.11865									Mkrn1	23664.4	37561.5	46651	4586.57	6107.23	11042.6	1.58726	1.97135	0.666536	0.979188	1.33155	2.40759	0.413103	1.26759
	0.688614	0.963063	0.199824	0.450854					219	1810013D15Rik	7082.15	15658.5	12018.2			2.21098	1.69697			1.14469	0.762959									Hn1	28088.1	45270.5	54756.2	8069.44	9268.22	11029.7	1.61173	1.94944	0.688614	0.963063	1.14856	1.36685	0.199824	0.450854
	0.697378	0.95668	0.910048	0.890523					220	1810013L24Rik	30098.1	44381.5	45907.9			1.47456	1.52528			0.560289	0.609072									Hspa4	26331.5	42698	51105.2	5926.46	11136.5	10986.8	1.62156	1.94084	0.697378	0.95668	1.87911	1.85385	0.910048	0.890523
	0.584549	0.53819	1.07733	0.683					221	1810014B01Rik	6674.14	13489.7	16163.1			2.02119	2.42175			1.0152	1.27605									Marcksl1	38245.3	57351.6	55537.9	6832.61	14417.7	10969.6	1.49957	1.45215	0.584549	0.53819	2.11013	1.60547	1.07733	0.683
	0.932462	1.07628	0.582113	1.37801					222	1810014F10Rik	7558.87	11076.1	10377.4			1.46531	1.37288			0.551202	0.457201									Cdc42se2	25086	47877.4	52896.3	4217.24	6313.38	10961	1.90853	2.1086	0.932462	1.07628	1.49704	2.59909	0.582113	1.37801
	0.677937	0.908695	0.679829	0.470747					223	1810019J16Rik	9598.91	15220.5	18061.6			1.58564	1.88163			0.665069	0.911986									Rpl27	23282.2	37248	43708.7	7906.25	12665.4	10956.7	1.59985	1.87735	0.677937	0.908695	1.60195	1.38583	0.679829	0.470747
	0.673956	0.754704	0.988822	0.502344					224	1810019N24Rik	4694.23	7185.05	6979.82			1.53061	1.48689			0.61411	0.572301									D4Wsu53e	31171.8	49732.7	52595.7	7725.88	15332.5	10943.8	1.59544	1.68729	0.673956	0.754704	1.98456	1.41651	0.988822	0.502344
	0.567712	0.455619	0.823701	0.297902					225	1810020D17Rik	16204.3	26408.2	32283.3			1.6297	1.99226			0.704605	0.994408									Ddit4	33551.1	49728.4	46011	8881.11	15719	10918	1.48217	1.37137	0.567712	0.455619	1.76994	1.22936	0.823701	0.297902
	0.867789	1.32596	0.919985	0.931462					226	1810021B22Rik	4385.01	6828.59	6838.08			1.55726	1.55942			0.639008	0.641011									Canx	21070.4	38450.5	52823.3	5724.62	10831.5	10918	1.82486	2.507	0.867789	1.32596	1.8921	1.90721	0.919985	0.931462
	0.449606	0.582952	0.930133	0.52274					227	1810022K09Rik	9564.55	12660.8	18181.9			1.32372	1.90097			0.4046	0.926734									Fus	41045.5	56054.6	61482.6	7575.57	14434.9	10883.7	1.36567	1.49791	0.449606	0.582952	1.90545	1.43668	0.930133	0.52274
	0.601391	0.819288	0.663284	0.322958					228	1810024B03Rik	5059.29	8967.35	9909.2			1.77245	1.95861			0.825747	0.969834									Gm16631	28066.6	42582.1	49524.5	8683.56	13752	10862.2	1.51718	1.76454	0.601391	0.819288	1.58368	1.25089	0.663284	0.322958
	0.451502	0.894585	0.373615	1.04596					229	1810026J23Rik	14872.9	32266.2	28851.4			2.16945	1.93986			1.11733	0.95595									Ldhb	26902.7	36788.5	50014.2	5260.81	6815.88	10862.2	1.36746	1.85908	0.451502	0.894585	1.2956	2.06474	0.373615	1.04596
	0.629237	0.732584	0.761509	0.688674					230	1810027O10Rik	11183.7	28014.4	32858.9			2.50493	2.9381			1.32477	1.55488									Sfpq	27907.7	43166.1	46371.8	6733.84	11415.6	10853.6	1.54675	1.66161	0.629237	0.732584	1.69526	1.6118	0.761509	0.688674
	0.55293	0.767611	0.437373	0.144264					231	1810029B16Rik	14370.5	21413.4	16519.6			1.4901	1.14956			0.57541	0.201076									Rpsa	27869	40885.6	47445.6	9813.02	13288.2	10845	1.46706	1.70245	0.55293	0.767611	1.35414	1.10517	0.437373	0.144264
	0.432147	0.645431	1.25787	1.32067					232	1810030N24Rik	17050.4	25102.6	26793.9			1.47226	1.57145			0.558029	0.6521									Eif5	30716.5	41443.9	48047	4324.6	10341.9	10802.1	1.34924	1.56421	0.432147	0.645431	2.39142	2.49782	1.25787	1.32067
	0.01825	0.569701	-0.46412	0.055794					233	1810030O07Rik	18094	26700.2	38829.3			1.47563	2.14597			0.561336	1.10163									Sp140	6734.27	6820	9995.11	10379.9	7524.52	10789.2	1.01273	1.48422	0.0182502	0.569701	0.724913	1.03943	-0.464121	0.055794
	0.184575	0.125345	-0.0347	-0.62169					234	1810031K17Rik	10887.4	16259.8	17752.4			1.49346	1.63055			0.578654	0.70536									Pisd-ps1	12081.3	13730.2	13177.9	16581.2	16187.2	10776.3	1.13648	1.09077	0.184575	0.125345	0.976235	0.64991	-0.0346994	-0.621688
	0.674748	0.654942	0.685278	0.015803					235	1810032O08Rik	18729.7	33713.5	40951.2			1.8	2.18643			0.847998	1.12858									Arrdc2	36548.9	58343.6	57548.1	10646.2	17119.2	10763.4	1.59632	1.57455	0.674748	0.654942	1.60801	1.01101	0.685278	0.0158034
	0.889292	0.997741	0.54331	0.709935					236	1810035L17Rik	12300.4	17990.5	18001.5			1.4626	1.46349			0.548539	0.549418									Pih1d1	23119	42822.6	46165.6	6574.94	9581.74	10754.8	1.85227	1.99687	0.889292	0.997741	1.45731	1.63573	0.54331	0.709935
	0.28749	0.92452	0.515474	0.804932					237	1810037I17Rik	13305.3	25136.9	31329.7			1.88924	2.35467			0.917804	1.23553									Uchl1	30145.3	36792.8	57217.4	6141.19	8778.61	10729	1.22051	1.89805	0.28749	0.92452	1.42946	1.74706	0.515474	0.804932
	0.64721	0.794183	0.239508	0.119363					238	1810043G02Rik	8065.66	14026.5	21141.3			1.73904	2.62116			0.798293	1.3902									Pkm2	30828.2	48281.1	53459	9873.15	11656.1	10724.8	1.56614	1.7341	0.64721	0.794183	1.18059	1.08626	0.239508	0.119363
	0.921683	1.03694	0.535728	0.802324					239	1810043H04Rik	9732.05	14533.3	18525.5			1.49334	1.90356			0.578547	0.928699									Aldh16a1	22118.3	41899.2	45383.9	6132.6	8890.27	10694.7	1.89432	2.05187	0.921683	1.03694	1.44967	1.74391	0.535728	0.802324
	0.582356	0.773405	0.77281	1.1672					240	1810046J19Rik	8091.43	20455.7	27691.6			2.52807	3.42234			1.33804	1.77498									Rpl19	24922.8	37316.7	42600.6	4758.35	8130.09	10686.1	1.49729	1.7093	0.582356	0.773405	1.70859	2.24576	0.77281	1.1672
	0.622757	0.872293	0.262809	0.135184					241	1810048J11Rik	10767.1	25742.5	28181.3			2.39085	2.61735			1.25752	1.38811									Rps8	27319.3	42066.7	50009.9	9718.54	11660.4	10673.2	1.53981	1.83057	0.622757	0.872293	1.19981	1.09823	0.262809	0.135184
	1.01174	1.10704	1.1125	0.743943					242	1810049H13Rik	10930.3	23882.9	29555.8			2.18502	2.70402			1.12764	1.43511									Sf1	26194.1	52816.3	56422.7	6360.21	13752	10651.7	2.01635	2.15403	1.01174	1.10704	2.16219	1.67475	1.1125	0.743943
	1.12027	1.3782	1.7954	1.68197					243	1810055G02Rik	18227.2	32661.3	37433.3			1.7919	2.05371			0.841489	1.03823									Immt	20593.6	44768.1	53532	3319.68	11523	10651.7	2.17388	2.59944	1.12027	1.3782	3.47112	3.20866	1.7954	1.68197
	0.614118	0.998024	1.08737	0.457569					244	1810058I24Rik	17570.1	28031.6	30664			1.59541	1.74524			0.673931	0.803423									G3bp1	32009.2	48994.1	63930.9	7747.35	16462	10638.9	1.53062	1.99726	0.614118	0.998024	2.12486	1.37323	1.08737	0.457569
	0.802639	0.733227	1.23198	0.37857					245	1810059C17Rik	11372.7	26558.5	19925.8			2.33529	1.75208			1.2236	0.809066									Eif4ebp1	33143.1	57811.1	55095.5	8176.8	19206.4	10630.3	1.74429	1.66235	0.802639	0.733227	2.34889	1.30005	1.23198	0.37857
	1.03338	0.98341	0.841506	0.710191					246	1810062O18Rik	23011.6	31196.8	34929.2			1.3557	1.51789			0.439034	0.60207									Cdc5l	24377.4	49895.9	48197.3	6497.64	11643.2	10630.3	2.04681	1.97713	1.03338	0.98341	1.79192	1.63602	0.841506	0.710191
	0.620043	0.639331	0.594238	-0.01953					247	1810063B05Rik	15491.4	27125.4	19973			1.751	1.2893			0.808176	0.366586									Pisd-ps2	18244.4	28040.2	28417.5	10762.1	16247.3	10617.4	1.53692	1.55761	0.620043	0.639331	1.50967	0.986551	0.594238	-0.0195345
	0.942964	0.810371	0.531431	0.495204					248	1810063B07Rik	23604.3	38935.8	40233.8			1.64952	1.70451			0.722049	0.76936									H2afj	22560.7	43372.3	39563.8	7532.62	10887.4	10617.4	1.92247	1.75366	0.942964	0.810371	1.44536	1.40952	0.531431	0.495204
	0.684683	1.11727	0.115932	0.679532					249	1810063I02Rik	6068.57	6820	15243.9			1.12382	2.51195			0.168415	1.32881									Slc25a39	20696.7	33266.8	44898.5	6626.47	7180.94	10613.1	1.60735	2.16936	0.684683	1.11727	1.08368	1.60162	0.115932	0.679532
	0.577932	0.672742	1.63021	0.901885					250	1810074P20Rik	11235.2	20653.3	21253			1.83826	1.89164			0.87834	0.919639									Tubb5	32258.3	48152.3	51423	5673.09	17561.5	10600.2	1.49271	1.5941	0.577932	0.672742	3.09558	1.86851	1.63021	0.901885
	0.538129	0.560585	0.678953	0.258888					251	2010001A14Rik	8215.98	19734.2	29680.4			2.40193	3.61252			1.26419	1.853									Rpl5	31755.9	46112.3	46835.7	8855.34	14177.2	10595.9	1.45209	1.47487	0.538129	0.560585	1.60098	1.19656	0.678953	0.258888
	0.834409	0.888953	1.06918	0.963179					252	2010001M06Rik	4934.74	5291.08	8032.17			1.07221	1.62768			0.100588	0.702816									Strap	23273.6	41499.8	43098.8	5428.3	11389.9	10583	1.78313	1.85183	0.834409	0.888953	2.09824	1.9496	1.06918	0.963179
	1.17783	1.297	0.374195	0.967752					253	2010002N04Rik	4827.37	3160.91	7426.53			0.654789	1.53842			-0.610897	0.621451									Tmem97	19983.8	45210.4	49103.6	5411.12	7013.44	10583	2.26236	2.45717	1.17783	1.297	1.29612	1.95579	0.374195	0.967752
	0.710154	0.880393	0.616933	0.136036					254	2010003O02Rik	31498.2	53108.4	59485.3			1.68608	1.88853			0.753672	0.917265									Actg1	30596.3	50054.8	56323.9	9611.18	14739.8	10561.5	1.63598	1.84088	0.710154	0.880393	1.53361	1.09888	0.616933	0.136036
	0.786291	1.03779	1.19957	0.72408					255	2010011I20Rik	7661.95	23505	29457			3.06775	3.84458			1.61718	1.94283									Myst2	27220.5	46945.5	55885.8	6385.98	14666.8	10548.7	1.72463	2.05308	0.786291	1.03779	2.29672	1.65185	1.19957	0.72408
	0.267416	0.776162	0.712766	1.20428					256	2010012O05Rik	12141.4	22950.9	23688.5			1.8903	1.95104			0.918613	0.964244									Zfp710	26146.8	31471.6	44778.2	4577.98	7503.05	10548.7	1.20365	1.71257	0.267416	0.776162	1.63894	2.30422	0.712766	1.20428
	0.503709	0.532229	1.0038	0.332597					257	2010012P19Rik	12240.2	20155.1	21734.1			1.64663	1.77563			0.719513	0.828331									Tubb4b	43072.7	61070.8	62290.1	8352.88	16749.8	10518.6	1.41785	1.44616	0.503709	0.532229	2.00527	1.25928	1.0038	0.332597
	0.579947	0.612573	0.83958	0.475122					258	2010015L04Rik	7979.77	9822	20638.8			1.23086	2.58639			0.29967	1.37094									Hmgb2	33233.3	49676.9	50813.1	7545.51	13502.9	10488.5	1.49479	1.52898	0.579947	0.612573	1.78953	1.39004	0.83958	0.475122
	0.804743	0.729603	0.405898	-0.01628					259	2010015M23Rik	14842.9	26421	32614			1.78005	2.19728			0.831917	1.13572									Rpl17	29913.4	52253.7	49601.8	10603.2	14048.4	10484.2	1.74683	1.65818	0.804743	0.729603	1.32491	0.988779	0.405898	-0.0162802
	0.870373	0.704722	1.02185	0.431065					260	2010106G01Rik	13077.7	23440.5	23924.7			1.7924	1.82943			0.841895	0.87139									Rps28	24446.1	44690.8	39843	7773.12	15783.5	10479.9	1.82814	1.62983	0.870373	0.704722	2.03052	1.34823	1.02185	0.431065
	-0.80898	1.37757	-0.13144	1.3742					261	2010107E04Rik	12047	25703.8	24517.4			2.13364	2.03516			1.09332	1.02514									A430104N18Rik	16560.8	9452.66	43030.1	4041.16	3689.25	10475.6	0.570785	2.59831	-0.80898	1.37757	0.912919	2.59224	-0.131442	1.3742
	0.623108	0.440634	0.507211	0.255871					262	2010107H07Rik	12485	24363.9	23160.1			1.95145	1.85503			0.964545	0.891444									Rps24	31442.3	48427.2	42673.6	8747.98	12433.5	10445.6	1.54019	1.3572	0.623108	0.440634	1.4213	1.19406	0.507211	0.255871
	0.62061	0.73333	0.140675	0.44397					263	2010109A12Rik	13966.7	25974.4	25930.6			1.85973	1.8566			0.895095	0.892659									1810009A15Rik	23896.3	36741.2	39727	7678.64	8465.09	10445.6	1.53753	1.66247	0.62061	0.73333	1.10242	1.36034	0.140675	0.44397
	0.770124	0.853535	0.810906	0.306008					264	2010110K18Rik	6480.87	12398.8	12885.8			1.91314	1.98829			0.935945	0.991526									Rpl9	25021.6	42672.2	45212.1	8438.77	14804.2	10432.7	1.70542	1.80692	0.770124	0.853535	1.75431	1.23628	0.810906	0.306008
	0.589765	0.635903	0.904769	0.633513					265	2010111I01Rik	6047.1	9663.1	10471.9			1.59797	1.73172			0.676243	0.792205									Ankrd10	35801.6	53881.4	55632.4	6716.66	12575.2	10419.8	1.505	1.55391	0.589765	0.635903	1.87224	1.55134	0.904769	0.633513
	0.98552	1.60819	0.866408	1.64597					266	2010305A19Rik	14331.8	21692.6	23748.6			1.5136	1.65705			0.597982	0.728621									2210403K04Rik	16165.7	32008.5	49284	3323.97	6059.99	10402.6	1.98003	3.04868	0.98552	1.60819	1.82312	3.12958	0.866408	1.64597
	0.531777	0.717361	0.170877	-0.39098					267	2010317E24Rik	16878.6	34203.1	31948.3			2.02641	1.89282			1.01893	0.92054									Mcl1	33405.1	48294	54923.7	13635.2	15349.7	10398.3	1.44571	1.64417	0.531777	0.717361	1.12574	0.762612	0.170877	-0.390978
	0.527159	0.627727	0.625561	0.462293					268	2010321M09Rik	13296.8	24759	23697			1.86203	1.78217			0.896879	0.833633									Scarna2	33336.3	48040.6	51508.9	7541.21	11634.7	10389.8	1.44109	1.54513	0.527159	0.627727	1.54281	1.37773	0.625561	0.462293
	0.624857	0.887206	0.031433	0.373865					269	2200002D01Rik	8538.09	10191.4	10343			1.19363	1.2114			0.25536	0.276672									Gadd45a	27546.9	42479	50950.6	8017.9	8194.51	10389.8	1.54206	1.84959	0.624857	0.887206	1.02203	1.29582	0.0314333	0.373865
	0.702488	0.855271	0.586176	0.493148					270	2210008F06Rik	4346.35	5153.65	8916.99			1.18574	2.0516			0.24579	1.03675									Rrm2	29711.5	48349.8	53751.1	7369.43	11063.5	10372.6	1.62731	1.8091	0.702488	0.855271	1.50126	1.40751	0.586176	0.493148
	0.665502	0.795095	0.819522	0.865117					271	2210009G21Rik	14349	24411.1	32042.8			1.70125	2.23311			0.766592	1.15905									Rps26	21409.7	33958.3	37149.8	5694.56	10049.9	10372.6	1.58612	1.73519	0.665502	0.795095	1.76482	1.82149	0.819522	0.865117
	0.732932	0.631915	0.850762	0.083234					272	2210010C17Rik	4427.95	5458.58	3831.39			1.23276	0.865274			0.301887	-0.208771									Rpl28	29483.9	49002.6	45688.8	9782.96	17643.1	10364	1.66201	1.54962	0.732932	0.631915	1.80345	1.05939	0.850762	0.0832338
	0.719475	0.860911	0.392142	0.242432					273	2210011C24Rik	5600.44	13116	6661.97			2.34197	1.18954			1.22772	0.250409									E130317F20Rik	24927.1	41044.5	45272.2	8760.86	11497.2	10364	1.64658	1.81618	0.719475	0.860911	1.31234	1.18299	0.392142	0.242432
	0.841362	0.947792	0.483322	0.512438					274	2210012G02Rik	5085.06	7159.28	8672.16			1.4079	1.70542			0.49355	0.770127									Rpl38	19760.4	35405.6	38116.3	7253.48	10140.1	10346.8	1.79174	1.92892	0.841362	0.947792	1.39796	1.42646	0.483322	0.512438
	0.513325	0.697474	0.900453	0.305417					275	2210013O21Rik	4810.19	6914.48	7383.58			1.43747	1.53499			0.523527	0.618227									H2afz	35775.8	51064.1	58016.3	8365.76	15616	10338.2	1.42734	1.62166	0.513325	0.697474	1.86665	1.23578	0.900453	0.305417
	1.06041	1.3766	0.499457	0.66714					276	2210015D19Rik	33379.3	59249.8	73797.1			1.77505	2.21087			0.827857	1.14461									1500010J02Rik	20275.8	42285.7	52647.2	6510.52	9203.8	10338.2	2.08552	2.59655	1.06041	1.3766	1.41368	1.58792	0.499457	0.66714
	0.56333	0.859067	0.469298	0.491128					277	2210016F16Rik	10535.2	13287.8	19371.7			1.26128	1.83876			0.334891	0.878735									Fam117a	28904.1	42710.9	52428.1	7352.25	10178.7	10333.9	1.47768	1.81387	0.56333	0.859067	1.38444	1.40554	0.469298	0.491128
	0.62518	0.758845	0.677619	0.279897					278	2210016L21Rik	14250.2	24269.4	24878.2			1.70309	1.74582			0.768157	0.803903									Rps7	23325.1	35976.8	39469.3	8490.3	13580.2	10308.1	1.5424	1.69214	0.62518	0.758845	1.5995	1.21411	0.677619	0.279897
	0.770887	0.938646	0.421989	0.021404					279	2210018M11Rik	6858.82	16959.8	17945.7			2.4727	2.61644			1.30609	1.3876									Snhg7	24849.8	42401.7	47630.3	10139.4	13584.5	10291	1.70632	1.91673	0.770887	0.938646	1.33977	1.01495	0.421989	0.0214039
	0.574974	0.671199	1.05137	0.508954					280	2210021J22Rik	17149.2	31454.5	38262.3			1.83417	2.23114			0.875124	1.15778									Slc1a5	28942.8	43114.6	46088.3	7180.47	14881.5	10217.9	1.48965	1.5924	0.574974	0.671199	2.0725	1.42302	1.05137	0.508954
	0.733612	0.629553	1.01735	1.08081					281	2210403K04Rik	16165.7	32008.5	49284			1.98003	3.04868			0.98552	1.60819									Mrpl51	28788.1	47868.8	44537.7	4818.47	9753.53	10192.2	1.6628	1.54709	0.733612	0.629553	2.0242	2.11523	1.01735	1.08081
	0.044685	0.261812	1.26434	0.673989					282	2210404J11Rik	27546.9	35199.4	42738			1.2778	1.55146			0.35366	0.633627									RP24-201C14.10	34513.1	35598.8	41380.7	6377.39	15319.6	10175	1.03146	1.19898	0.0446853	0.261812	2.40218	1.59548	1.26434	0.673989
	0.552716	0.886711	0.877388	0.38926					283	2210406O10Rik	9139.37	16126.6	19071			1.76452	2.08669			0.819278	1.06122									Pfn1	26778.2	39279.4	49511.7	7768.82	14271.7	10175	1.46684	1.84896	0.552716	0.886711	1.83705	1.30972	0.877388	0.38926
	0.781623	1.01021	0.502216	0.402882					284	2210408F21Rik	3861.04	7039.03	6155.13			1.82309	1.59416			0.866387	0.6728									C130036L24Rik	24570.6	42238.5	49490.2	7695.81	10900.2	10175	1.71906	2.0142	0.781623	1.01021	1.41639	1.32215	0.502216	0.402882
	0.645808	0.829206	0.797107	0.636722					285	2210408I21Rik	5926.84	7962.39	8749.48			1.34345	1.47625			0.425938	0.561934									Eif4g2	32151	50303.9	57122.9	6527.7	11342.6	10149.2	1.56462	1.77671	0.645808	0.829206	1.73761	1.55479	0.797107	0.636722
	0.402243	0.528839	0.491338	0.061947					286	2210411K11Rik	18480.6	17166	26944.3			0.928864	1.45798			-0.106461	0.543968									Hnrnpa2b1	34388.6	45446.6	49614.7	9718.54	13661.8	10144.9	1.32156	1.44277	0.402243	0.528839	1.40575	1.04387	0.491338	0.0619474
	0.930206	0.906501	0.121257	-0.99799					287	2210417A02Rik	4140.2	7472.79	6477.28			1.80493	1.56448			0.851947	0.645688									Fth1	25794.7	49152.9	48351.9	20244.5	22019.5	10136.3	1.90555	1.87449	0.930206	0.906501	1.08768	0.500697	0.121257	-0.99799
	0.754674	0.926916	1.07068	0.757662					288	2210417K05Rik	11523	27430.3	27017.3			2.38049	2.34464			1.25126	1.22937									Bclaf1	25683	43333.6	48828.7	5995.18	12592.4	10136.3	1.68725	1.90121	0.754674	0.926916	2.10042	1.69075	1.07068	0.757662
	0.756209	1.00441	0.865516	0.628262					289	2210418O10Rik	4483.79	13468.2	10510.5			3.00376	2.34412			1.58677	1.22905									Rpl23a	24008	40550.7	48162.9	6557.76	11948.2	10136.3	1.68905	2.00612	0.756209	1.00441	1.82199	1.5457	0.865516	0.628262
	0.772505	1.11494	0.914001	0.772025					290	2300009A05Rik	16419.1	31136.7	34847.6			1.89637	2.12238			0.92324	1.08568									Urgcp	33890.4	57892.7	73402	5930.76	11175.1	10127.8	1.70823	2.16586	0.772505	1.11494	1.88426	1.70766	0.914001	0.772025
	1.01923	1.39679	1.3932	1.5833					291	2310001A20Rik	4342.06	11711.7	11464.1			2.69726	2.64024			1.4315	1.40067									Ddx42	17406.9	35281	45834.9	3379.8	8877.39	10127.8	2.02684	2.63315	1.01924	1.39679	2.6266	2.99655	1.3932	1.5833
	0.556369	0.830967	0.056713	0.605177					292	2310001K24Rik	9044.88	14984.2	13749.2			1.65665	1.52011			0.728273	0.604172									Ube2c	22569.2	33189.5	40147.9	6652.24	6918.95	10119.2	1.47056	1.77888	0.556369	0.830967	1.04009	1.52117	0.0567129	0.605177
	0.830384	0.707949	0.530708	0.083576					293	2310002F09Rik	3139.51	3105.08	9733.1			0.989033	3.1002			-0.015909	1.63236									Gm20422	30381.5	54023.2	49627.6	9525.29	13760.6	10093.4	1.77816	1.63348	0.830384	0.707949	1.44464	1.05964	0.530708	0.0835759
	0.783562	0.939546	1.14685	1.14385					294	2310002J15Rik	5557.49	4926.03	10905.7			0.886377	1.96234			-0.174008	0.972578									Cd81	27873.3	47980.5	53459	4552.21	10079.9	10059	1.72138	1.91793	0.783562	0.939546	2.2143	2.2097	1.14685	1.14385
	0.469178	0.614858	0.114527	-0.00353					295	2310003C23Rik	14950.2	20739.2	24234			1.38721	1.62097			0.472187	0.69686									Hnrnpu	35466.6	49097.1	54313.8	10040.6	10870.2	10016.1	1.38432	1.53141	0.469178	0.614858	1.08262	0.997555	0.114527	-0.0035318
	0.748082	1.14092	0.220277	1.32025					296	2310003H01Rik	17020.3	35208	38653.2			2.06858	2.271			1.04864	1.18333									Med1	17600.2	29560.5	38812.1	4011.1	4672.76	10016.1	1.67956	2.20521	0.748082	1.14092	1.16496	2.49709	0.220277	1.32025
	0.497684	0.512871	0.653459	-0.52915					297	2310003L22Rik	16419.1	26154.8	32523.8			1.59295	1.98086			0.671701	0.986124									Ftl1	34057.9	48087.9	48596.8	14416.8	22676.6	9990.3	1.41195	1.42689	0.497684	0.512871	1.57293	0.692964	0.653459	-0.529148
	0.679817	0.760828	1.03331	0.419767					298	2310004I24Rik	11278.2	22010.4	26549.1			1.95159	2.35402			0.96465	1.23513									Ywhag	31313.5	50162.2	53059.5	7468.2	15285.3	9990.3	1.60194	1.69446	0.679817	0.760828	2.04671	1.33771	1.03331	0.419767
	1.26343	1.23535	0.481613	0.706051					299	2310004N24Rik	7567.46	20588.8	28782.6			2.72071	3.80347			1.44398	1.92732									Cnbp	18991.7	45592.6	44713.8	6124.01	8550.98	9990.3	2.40067	2.35439	1.26343	1.23535	1.3963	1.63133	0.481613	0.706051
	0.672362	0.904577	0.810949	0.981032					300	2310008H04Rik	11922.4	28778.8	31621.8			2.41385	2.6523			1.27133	1.40725									6430527G18Rik	21607.2	34435	40448.6	5050.38	8860.21	9968.83	1.59368	1.872	0.672362	0.904577	1.75437	1.97388	0.810949	0.981032
	0.804128	0.654455	1.10207	0.26695					301	2310008H09Rik	4707.12	4951.8	6511.64			1.05198	1.38336			0.0731084	0.468176									Smarca5	34427.2	60113.1	54189.2	8266.99	17746.2	9947.35	1.74609	1.57402	0.804128	0.654455	2.14663	1.20326	1.10208	0.26695
	0.761699	0.774785	1.38465	1.00205					302	2310009B15Rik	15323.9	27980	34641.4			1.82591	2.26061			0.868614	1.17671									Rpl39	22569.2	38265.9	38614.5	4955.9	12940.3	9925.88	1.69549	1.71094	0.761699	0.774785	2.61109	2.00284	1.38465	1.00205
	0.678633	0.567447	1.22249	1.0874					303	2310010G23Rik	5892.49	10397.5	14045.5			1.76453	2.38364			0.819286	1.25316									Fau	23402.4	37458.5	34680.1	4650.99	10853	9882.93	1.60062	1.4819	0.678633	0.567447	2.33348	2.12491	1.22249	1.0874
	0.846712	0.92163	0.981947	0.559635					304	2310011J03Rik	11054.9	22542.9	22021.9			2.03919	1.99206			1.028	0.994258									Adal	30321.4	54529.9	57436.4	6699.48	13232.3	9874.34	1.7984	1.89425	0.846712	0.92163	1.97513	1.4739	0.981947	0.559635
	0.846712	0.92163	0.981947	0.559635					305	2310014F06Rik	5415.76	8271.61	8461.69			1.52732	1.56242			0.611004	0.643782									Lcmt2	30321.4	54529.9	57436.4	6699.48	13232.3	9874.34	1.7984	1.89425	0.846712	0.92163	1.97513	1.4739	0.981947	0.559635
	0.941607	1.27661	1.038	0.649025					306	2310014L17Rik	24038.1	35324	31523			1.4695	1.31138			0.555327	0.391085									Nfe2l1	19988.1	38390.4	48424.9	6291.5	12918.8	9865.75	1.92067	2.42269	0.941607	1.27661	2.05338	1.56811	1.038	0.649025
	1.01167	1.0345	0.321723	1.24755					307	2310015A10Rik	9835.12	8834.22	16717.2			0.898232	1.69975			-0.15484	0.76532									Pmm1	18983.1	38274.4	38885.1	4144.23	5179.55	9839.98	2.01624	2.04841	1.01167	1.0345	1.24982	2.37438	0.321723	1.24755
	0.67592	0.739071	0.531618	0.919255					308	2310016M24Rik	11097.8	26116.1	32760.1			2.35327	2.95194			1.23467	1.56166									Ddx39b	19043.2	30423.7	31785	5196.39	7511.64	9827.09	1.59762	1.6691	0.67592	0.739071	1.44555	1.89114	0.531618	0.919255
	-0.53191	-0.604385	0.351518	-0.09451					309	2310021P13Rik	6231.78	8318.85	17181.1			1.33491	2.75701			0.41674	1.46311									4933403O03Rik	11630.4	8043.99	7649.89	10478.7	13369.8	9814.21	0.691637	0.657752	-0.531913	-0.604385	1.2759	0.936588	0.351518	-0.0945129
	0.531043	0.791093	0.466442	-0.02926					310	2310022A10Rik	16573.7	28358	28628			1.71102	1.72732			0.774859	0.788533									Slc25a5	30420.2	43956.3	52638.6	9993.39	13807.8	9792.73	1.44497	1.73039	0.531043	0.791093	1.3817	0.979921	0.466442	-0.0292631
	0.143236	-0.553365	-0.33128	-0.80637					311	2310022B05Rik	13219.4	24260.8	23868.8			1.83524	1.80559			0.875967	0.852468									4930467E23Rik	12669.7	13992.2	8633.5	17118	13606	9788.44	1.10438	0.681429	0.143236	-0.553365	0.794833	0.57182	-0.331276	-0.806366
	1.24252	1.48916	1.07215	0.981265					312	2310028H24Rik	6132.99	12905.6	23615.4			2.10429	3.85056			1.07333	1.94507									Ube2z	19399.7	45901.9	54459.8	4947.31	10402	9766.96	2.36611	2.80725	1.24252	1.48916	2.10257	1.9742	1.07215	0.981265
	0.572415	0.598821	0.690606	0.366472					313	2310030G06Rik	6541	19012.7	13474.3			2.90669	2.05997			1.53938	1.04263									Phf17	28350.1	42156.9	42935.6	7562.68	12205.9	9749.78	1.48701	1.51448	0.572415	0.598821	1.61396	1.2892	0.690606	0.366472
	0.978262	0.824525	0.29389	-0.60395					314	2310030N02Rik	9517.31	15430.9	20793.4			1.62135	2.1848			0.697196	1.1275									Dusp1	28908.4	56952.2	51195.4	14811.9	18158.5	9745.49	1.97009	1.77095	0.978262	0.824525	1.22594	0.657951	0.29389	-0.603947
	0.612883	1.03259	0.591077	0.740119					315	2310033P09Rik	16062.6	33782.2	42183.9			2.10316	2.62622			1.07256	1.39299									Ccng1	28242.7	43191.9	57775.8	5819.1	8765.72	9719.72	1.52931	2.04569	0.612883	1.03259	1.50637	1.67031	0.591077	0.740119
	-0.29527	1.08616	0.486761	0.959321					316	2310035C23Rik	14812.8	27267.1	32515.2			1.84078	2.19508			0.880316	1.13427									Gm3715	16500.7	13446.7	35032.3	4998.84	7004.85	9719.72	0.81492	2.12308	-0.295269	1.08616	1.4013	1.9444	0.486761	0.959321
	0.673106	0.704327	0.665757	0.260908					317	2310036O22Rik	33770.1	62384.9	48622.5			1.84734	1.43981			0.88545	0.525877									Rps23	21555.7	34370.6	35122.5	8086.62	12828.6	9689.65	1.5945	1.62938	0.673106	0.704327	1.5864	1.19823	0.665757	0.260908
	0.644216	0.51722	0.745081	0.245264					318	2310037I24Rik	25605.7	40250	40225.3			1.57192	1.57095			0.652526	0.651638									Upf3a	37025.6	57866.9	52990.8	8163.92	13683.3	9676.77	1.56289	1.43119	0.644216	0.51722	1.67607	1.18531	0.745081	0.245264
	0.751866	1.15219	0.907944	0.789836					319	2310039H08Rik	15959.5	26425.3	33997.1			1.65577	2.13021			0.727504	1.09099									Acly	28229.8	47538.1	62741.1	5587.2	10483.6	9659.59	1.68397	2.22251	0.751866	1.15219	1.87637	1.72888	0.907944	0.789836
	0.503983	0.649164	0.631173	0.225892					320	2310043M15Rik	3392.9	5278.2	3805.61			1.55566	1.12164			0.637527	0.165609									5430416N02Rik	29045.8	41190.6	45551.4	8241.22	12764.2	9638.11	1.41812	1.56826	0.503983	0.649164	1.54882	1.1695	0.631173	0.225892
	0.832622	0.823554	1.01295	0.626275					321	2310044G17Rik	15401.2	21387.7	23765.8			1.3887	1.54311			0.473735	0.625842									Ube2s	23372.4	41624.3	41363.5	6235.67	12583.8	9625.22	1.78092	1.76976	0.832622	0.823554	2.01804	1.54357	1.01295	0.626275
	0.590528	0.682407	1.26547	0.860211					322	2310044H10Rik	17613	32425.1	37502.1			1.84097	2.12922			0.880466	1.09033									Arl6ip1	33860.3	50986.8	54339.5	5295.17	12729.8	9612.34	1.5058	1.60481	0.590528	0.682407	2.40405	1.8153	1.26547	0.860211
	0.538482	0.779367	0.91752	0.567837					323	2310045N01Rik	11334	15933.4	15531.7			1.4058	1.37036			0.491392	0.454558									Slc2a1	32490.3	47190.3	55765.6	6484.75	12248.8	9612.34	1.45244	1.71638	0.538482	0.779367	1.88887	1.4823	0.91752	0.567837
	0.769073	0.779094	0.540557	0.376816					324	2310046O06Rik	14937.4	26373.8	31286.8			1.76563	2.09453			0.820181	1.06663									A4galt	29853.2	50875.1	51229.8	7399.49	10762.8	9608.04	1.70417	1.71605	0.769073	0.779094	1.45453	1.29847	0.540557	0.376816
	0.640998	0.648592	0.888601	0.569081					325	2310047B19Rik	16449.1	26979.4	30651.1			1.64017	1.86339			0.713845	0.897926									Rps17	23552.8	36728.4	36922.2	6467.58	11974	9595.16	1.55941	1.56764	0.640998	0.648592	1.85138	1.48358	0.888601	0.569081
	1.20117	1.10768	1.02939	0.845331					326	2310047M10Rik	7777.91	19687	26604.9			2.53114	3.42058			1.33979	1.77424									Cdca3	21508.4	49453.6	46350.3	5338.11	10896	9590.86	2.29926	2.15498	1.20117	1.10768	2.04116	1.79668	1.02939	0.845331
	0.827857	1.14461	0.95483	0.697383					327	2310057M21Rik	8593.92	11978	11867.9			1.39377	1.38096			0.478993	0.46567									2210015D19Rik	33379.3	59249.8	73797.1	5909.29	11454.3	9582.27	1.77505	2.21087	0.827857	1.14461	1.93835	1.62156	0.95483	0.697383
	0.472887	0.745397	0.319607	0.412624					328	2310058D17Rik	8443.61	13837.5	17507.5			1.63882	2.07347			0.712657	1.05204									Tnrc6c	38816.5	53872.8	65073.4	7189.06	8971.88	9569.39	1.38788	1.67644	0.472887	0.745397	1.24799	1.3311	0.319607	0.412624
	0.081481	2.03037	0.382287	1.62326					329	2310061C15Rik	17552.9	44351.5	32313.4			2.52673	1.84091			1.33727	0.880421									Hist3h2ba	10195.9	10788.3	41651.3	3100.66	4041.42	9552.21	1.0581	4.08511	0.0814812	2.03037	1.30341	3.0807	0.382287	1.62326
	0.964529	1.08743	0.540392	0.724426					330	2310061I04Rik	21748.9	44441.7	44198.4			2.04339	2.03221			1.03097	1.02305									Ywhae	18940.1	36960.3	40246.7	5776.16	8400.66	9543.62	1.95143	2.12495	0.964529	1.08743	1.45437	1.65224	0.540392	0.724426
	0.696262	0.824546	0.694321	0.414561					331	2310067B10Rik	14185.8	22096.3	21476.4			1.55764	1.51394			0.639359	0.598306									Msh6	25464	41259.3	45096.1	7150.41	11570.2	9530.73	1.6203	1.77098	0.696262	0.824546	1.61812	1.33289	0.694321	0.414561
	0.793608	0.79997	0.653891	1.27917					332	2310079F23Rik	12897.3	25063.9	25483.9			1.94334	1.9759			0.95854	0.982512									Zfp213	25425.3	44072.3	44267.1	3925.21	6175.95	9526.44	1.7334	1.74107	0.793608	0.79997	1.57341	2.42699	0.653891	1.27917
	0.802592	1.04767	0.877007	0.977554					333	2400001E08Rik	15195	26442.5	30311.8			1.74021	1.99484			0.799259	0.996276									Senp3	27190.5	47426.5	56208	4831.36	8873.09	9513.55	1.74423	2.06719	0.802592	1.04767	1.83656	1.96912	0.877007	0.977554
	0.266767	0.373992	0.014891	-0.18839					334	2400003C14Rik	23187.7	47259	38593.1			2.03811	1.66438			1.02723	0.734981									Ints6	40233.8	48405.7	52140.3	10830.8	10943.2	9504.96	1.20311	1.29593	0.266767	0.373992	1.01038	0.877584	0.0148909	-0.188391
	0.810638	1.04499	0.466121	0.690446					335	2400009B08Rik	7159.46	13764.5	10892.8			1.92257	1.52146			0.943034	0.605455									Kat2a	22384.6	39262.2	46187.1	5879.22	8121.5	9487.78	1.75399	2.06335	0.810638	1.04499	1.38139	1.61378	0.466121	0.690446
	0.889996	0.909862	0.774285	0.925063					336	2410001C21Rik	8194.51	14262.7	10858.5			1.74052	1.32509			0.799521	0.40609									Cct8	21096.1	39094.7	39636.8	4994.55	8542.39	9483.49	1.85317	1.87887	0.889996	0.909862	1.71034	1.89877	0.774285	0.925063
	0.609461	0.779434	0.61316	0.243859					337	2410002F23Rik	27121.8	47035.7	48699.8			1.73424	1.7956			0.794305	0.844467									Dynll1	31803.1	48521.6	54588.7	8005.02	12244.5	9479.19	1.52569	1.71646	0.609461	0.779434	1.52961	1.18416	0.61316	0.243859
	0.960803	1.20658	0.884864	1.17583					338	2410002I01Rik	6674.14	15461	18783.2			2.31655	2.81433			1.21198	1.49279									Neurl4	17561.5	34181.6	40530.2	4195.76	7747.85	9479.19	1.94639	2.3079	0.960803	1.20658	1.84659	2.25923	0.884864	1.17583
	0.588211	0.749612	0.683605	0.224969					339	2410002O22Rik	9289.68	18896.7	18632.9			2.03416	2.00576			1.02444	1.00415									Dhx9	31412.3	47224.6	52814.7	8099.5	13009	9466.31	1.50338	1.68134	0.588211	0.749612	1.60615	1.16875	0.683605	0.224969
	0.70271	1.02553	1.06604	1.04338					340	2410003K15Rik	18201.4	34194.5	38129.2			1.87867	2.09485			0.909712	1.06684									Taf15	23965.1	39004.6	48785.7	4590.86	9611.8	9462.01	1.62756	2.0357	0.70271	1.02553	2.09368	2.06105	1.06604	1.04338
	0.835016	1.38832	0.011313	0.782374					341	2410003L11Rik	12364.8	22396.9	31269.6			1.81135	2.52893			0.857064	1.33853									Cdc42ep4	20512	36590.9	53695.2	5501.3	5544.61	9462.01	1.78388	2.61774	0.835016	1.38832	1.00787	1.71996	0.0113134	0.782374
	0.800325	0.982187	1.0475	0.661173					342	2410004B18Rik	13511.5	22976.7	26089.5			1.70053	1.93091			0.765985	0.949283									Atp5b	23595.7	41091.8	46612.3	5978	12356.2	9453.42	1.74149	1.97546	0.800325	0.982187	2.06694	1.58137	1.0475	0.661173
	0.876929	0.862413	0.31961	0.492336					343	2410004N09Rik	33701.4	43879.1	44082.4			1.30199	1.30803			0.380723	0.387394									Wsb1	20752.5	38111.2	37729.7	6686.6	8344.83	9406.18	1.83646	1.81808	0.876929	0.862413	1.24799	1.40672	0.31961	0.492336
	0.704082	0.874746	0.965553	0.218946					344	2410006H16Rik	48247.9	70536.3	76683.6			1.46195	1.58936			0.547899	0.66845									Cd9	27701.5	45128.8	50795.9	8078.03	15774.9	9401.88	1.62911	1.83369	0.704082	0.874746	1.95281	1.16388	0.965553	0.218946
	0.522624	0.791675	0.324619	-0.02011					345	2410012M07Rik	5913.96	14172.5	20668.9			2.39646	3.49493			1.2609	1.80526									Tra2b	31025.7	44570.5	53708.1	9533.88	11939.6	9401.88	1.43657	1.73108	0.522624	0.791675	1.25233	0.986155	0.324619	-0.0201142
	0.786992	0.905557	1.04226	0.72944					346	2410015M20Rik	7210.99	15585.5	19199.9			2.16135	2.66259			1.11194	1.41283									Csrnp2	26662.2	46004.9	49945.5	5647.32	11630.4	9363.23	1.72547	1.87327	0.786992	0.905557	2.05945	1.658	1.04226	0.72944
	0.707533	0.774805	-0.23859	0.229656					347	2410016O06Rik	14701.1	27894.1	28842.8			1.89741	1.96194			0.924033	0.972281									Pim3	26743.8	43672.9	45757.6	7970.67	6755.75	9346.05	1.63301	1.71096	0.707533	0.774805	0.847576	1.17256	-0.238585	0.229656
	0.827467	0.97165	0.107783	0.439133					348	2410017I17Rik	3380.02	3598.97	5021.18			1.06478	1.48555			0.0905523	0.570995									Luc7l	24257.1	43045.9	47570.2	6871.26	7404.27	9315.98	1.77457	1.96108	0.827467	0.97165	1.07757	1.35579	0.107783	0.439133
	0.838373	0.868962	0.840028	0.257366					349	2410017P09Rik	9783.59	19433.6	21407.7			1.98634	2.18812			0.990114	1.12969									Nop2	28311.4	50621.7	51706.5	7790.29	13945.3	9311.69	1.78803	1.82635	0.838373	0.868962	1.79008	1.19529	0.840028	0.257366
	0.833424	0.963668	0.43922	0.778829					350	2410018L13Rik	17600.2	27692.3	28971.6			1.57341	1.6461			0.653897	0.719054									Pkd1	28461.7	50716.2	55507.8	5419.71	7348.43	9298.8	1.78191	1.95026	0.833424	0.963668	1.35587	1.71574	0.43922	0.778829
	0.600549	0.709395	0.645306	-0.0865					351	2410018M08Rik	3002.08	6901.6	8551.89			2.29894	2.84865			1.20097	1.51028									Rps21	27482.5	41671.6	44937.2	9868.85	15435.6	9294.51	1.51629	1.63512	0.600549	0.709395	1.56407	0.941803	0.645306	-0.0865032
	0.485301	0.710309	0.610009	0.002845					352	2410019O14Rik	17587.3	26945	27326.5			1.53208	1.55377			0.615487	0.635773									Rpl8	29436.7	41207.7	48162.9	9271.91	14151.4	9290.21	1.39988	1.63615	0.485301	0.710309	1.52627	1.00197	0.610009	0.00284465
	0.282882	0.851278	0.657359	0.639534					353	2410022L05Rik	21937.9	43114.6	42029.3			1.9653	1.91583			0.97475	0.937969									Gm16832	29041.5	35332.6	52393.8	5960.82	9401.36	9285.92	1.21662	1.8041	0.282882	0.851278	1.57719	1.55783	0.657359	0.639534
	0.928316	1.3185	0.559638	0.694623					354	2410042D21Rik	18802.7	27151.2	29774.8			1.444	1.58354			0.530073	0.663154									Birc5	20786.9	39558.6	51844	5737.5	8456.5	9285.92	1.90305	2.49407	0.928316	1.3185	1.4739	1.61846	0.559638	0.694623
	0.783362	0.78165	0.774828	0.195305					355	2410057H14Rik	5097.94	5948.17	11691.7			1.16678	2.29342			0.222531	1.1975									Snhg1	20825.6	35843.7	35801.1	8095.21	13850.8	9268.74	1.72114	1.7191	0.783362	0.78165	1.71099	1.14497	0.774828	0.195305
	0.556223	0.634588	0.744388	0.734467					356	2410066E13Rik	8151.56	13730.2	20488.5			1.68436	2.51344			0.752204	1.32966									Matr3	34882.5	51291.7	54154.8	5565.72	9324.05	9260.15	1.47041	1.55249	0.556223	0.634588	1.67526	1.66378	0.744388	0.734467
	0.380723	0.387394	0.746122	-0.02307					357	2410075B13Rik	12244.5	17389.3	15768			1.42017	1.28776			0.506062	0.36486									2410004N09Rik	33701.4	43879.1	44082.4	9405.04	15774.9	9255.85	1.30199	1.30803	0.380723	0.387394	1.67728	0.984137	0.746122	-0.0230686
	0.773452	0.753174	0.337056	0.356048					358	2410080I02Rik	19150.6	17436.5	31742.1			0.910496	1.6575			-0.135276	0.729009									Rrn3	23720.3	40546.3	39980.4	7214.83	9113.6	9234.37	1.70936	1.6855	0.773452	0.753174	1.26318	1.27992	0.337056	0.356048
	0.669098	0.942049	0.817696	0.439834					359	2410089E03Rik	14589.5	27662.2	28898.6			1.89604	1.98078			0.922989	0.986072									4933440N22Rik	24424.6	38837.1	46925.9	6798.26	11982.5	9221.49	1.59008	1.92125	0.669098	0.942049	1.76259	1.35645	0.817696	0.439834
	0.685141	0.703253	0.704084	0.933855					360	2410091C18Rik	9074.94	17200.3	21497.9			1.89536	2.36893			0.922475	1.24423									Wdr77	24360.2	39167.8	39662.6	4827.06	7863.81	9221.49	1.60786	1.62817	0.685141	0.703253	1.62911	1.91037	0.704084	0.933855
	0.865852	1.23185	0.931798	1.2045					361	2410127L17Rik	17432.7	30471	34267.7			1.74793	1.96572			0.805644	0.975058									Slc1a4	19352.4	35268.2	45452.6	3993.92	7619.01	9204.31	1.82242	2.34868	0.865852	1.23185	1.90765	2.30458	0.931798	1.2045
	0.549428	0.893907	0.744944	0.704495					362	2410131K14Rik	13868	25111.2	22399.9			1.81073	1.61522			0.856574	0.691734									Zfp119a	25738.8	37668.9	47827.9	5643.02	9457.19	9195.72	1.46351	1.8582	0.549428	0.893907	1.67591	1.62957	0.744944	0.704495
	1.11569	1.22514	0.755887	1.27662					363	2410133F24Rik	12661.1	26206.3	25393.7			2.06983	2.00564			1.04951	1.00407									Rabggta	17381.1	37664.6	40633.3	3792.08	6403.57	9187.13	2.16698	2.33779	1.11569	1.22514	1.68867	2.42272	0.755887	1.27662
	0.665101	0.690522	0.940624	0.54948					364	2410137F16Rik	4732.89	13756	11747.6			2.90646	2.48212			1.53926	1.31157									Slc20a1	33619.8	53310.2	54257.9	6274.32	12042.7	9182.83	1.58568	1.61387	0.665101	0.690522	1.91936	1.46356	0.940624	0.54948
	0.491641	0.728097	0.886304	0.263208					365	2410137M14Rik	5329.86	10857	6451.5			2.03702	1.21044			1.02646	0.275537									Hist2h2ab	27276.4	38351.8	45182	7644.28	14130	9174.24	1.40604	1.65645	0.491641	0.728097	1.84843	1.20014	0.886304	0.263208
	0.586525	0.54023	0.103561	-0.31864					366	2410141K09Rik	12059.8	23084.1	15037.8			1.91413	1.24693			0.936686	0.318379									Calm1	40049.1	60138.8	58239.7	11436.4	12287.5	9169.95	1.50163	1.4542	0.586525	0.54023	1.07442	0.801824	0.103561	-0.318642
	0.335371	0.515485	0.575257	0.393293					367	2410152P15Rik	5463	7631.7	14578.2			1.39698	2.66853			0.482311	1.41604									Mif	30291.3	38218.6	43300.7	6978.63	10397.8	9165.65	1.2617	1.42947	0.335371	0.515485	1.48994	1.31339	0.575257	0.393293
	0.753273	0.922225	0.485521	0.674865					368	2500002B13Rik	11875.2	23135.6	16528.2			1.94823	1.39183			0.962168	0.476984									Ptges3	26013.7	43849	49296.9	5733.21	8027.02	9152.77	1.68561	1.89504	0.753273	0.922225	1.40009	1.59645	0.485521	0.674865
	1.02372	0.885808	0.676708	1.10136					369	2500003M10Rik	15122	28448.2	29809.2			1.88124	1.97124			0.911683	0.979106									Gm9631	11639	23663.8	21506.5	4255.89	6802.99	9131.29	2.03316	1.8478	1.02372	0.885808	1.59849	2.14557	0.676708	1.10136
	0.663914	0.875644	0.308099	0.585816					370	2500004C02Rik	13365.5	21052.7	28486.3			1.57515	2.13133			0.655494	1.09176									Aplp2	24854.1	39378.2	45602.9	6081.07	7528.82	9127	1.58437	1.83483	0.663914	0.875644	1.23807	1.50089	0.308099	0.585816
	0.46798	0.763887	0.688022	0.437353					371	2510002D24Rik	16616.6	32996.2	32815.9			1.98574	1.97488			0.989673	0.981767									Kdm5b	31146	43080.2	52887.7	6733.84	10848.7	9118.41	1.38317	1.69806	0.46798	0.763887	1.61107	1.35412	0.688022	0.437353
	0.541111	1.07133	0.65348	0.821363					372	2510003E04Rik	16513.6	31467.3	34422.3			1.90555	2.08449			0.930204	1.05969									Tug1	12059.8	17548.2	25342.1	5157.74	8112.91	9114.11	1.45509	2.10137	0.541111	1.07133	1.57296	1.76707	0.65348	0.821363
	0.961632	0.910153	1.02771	1.07199					373	2510006D16Rik	16423.4	19781.4	24899.7			1.20447	1.51611			0.268397	0.600379									Tmed1	22440.4	43703	42171	4333.19	8834.44	9109.82	1.94751	1.87924	0.961632	0.910153	2.03878	2.10234	1.02771	1.07199
	0.519823	0.62334	0.891864	0.064892					374	2510009E07Rik	3788.03	19364.8	7834.58			5.11212	2.06825			2.35392	1.04841									Sod1	30660.7	43960.7	47230.8	8705.03	16152.8	9105.52	1.43378	1.54044	0.519823	0.62334	1.85557	1.04601	0.891864	0.0648921
	0.637752	0.766247	1.02543	0.371822					375	2510012J08Rik	10784.3	29753.8	27030.2			2.75899	2.50644			1.46414	1.32564									Ptms	34663.4	53933	58957	7030.16	14310.3	9096.93	1.5559	1.70084	0.637752	0.766247	2.03556	1.29399	1.02543	0.371822
	1.08414	1.24725	0.909379	0.512414					376	2510039O18Rik	12910.2	24660.2	24002			1.91013	1.85915			0.933673	0.894642									Setd5	24553.5	52056.2	58286.9	6377.39	11978.2	9096.93	2.12012	2.37388	1.08414	1.24725	1.87824	1.42643	0.909379	0.512414
	0.514926	0.662878	1.2895	0.661149					377	2510046G10Rik	34706.4	47851.7	56985.4			1.37876	1.64193			0.463367	0.715391									Cbx7	33581.2	47984.8	53166.9	5741.8	14035.5	9079.75	1.42892	1.58324	0.514926	0.662878	2.44444	1.58134	1.2895	0.661149
	0.703104	0.938413	-0.23675	-0.17746					378	2600006K01Rik	8069.96	16951.2	22292.5			2.10053	2.7624			1.07076	1.46592									Cox6b2	29986.4	48818	57466.5	10268.2	8714.19	9079.75	1.628	1.91642	0.703104	0.938413	0.848655	0.884256	-0.23675	-0.177464
	0.3807	0.815444	-0.02146	0.642105					379	2610001J05Rik	9130.78	21868.7	17477.5			2.39505	1.91413			1.26005	0.936687									Tcf15	31485.3	40993	55409.1	5793.33	5707.81	9041.1	1.30197	1.75984	0.3807	0.815444	0.985238	1.56061	-0.0214555	0.642105
	0.240814	0.555531	-0.67641	-0.06681					380	2610002D18Rik	23608.6	43939.2	43073			1.86115	1.82446			0.896196	0.867473									Hmga1	29973.5	35418.5	44052.3	9465.16	5922.55	9036.8	1.18166	1.46971	0.240814	0.555531	0.625721	0.954744	-0.676408	-0.0668149
	0.863073	1.07802	1.08564	1.17267					381	2610002I17Rik	14696.9	24076.1	24882.5			1.63818	1.69305			0.712097	0.759626									Mob1b	20756.8	37754.8	43820.4	4006.81	8503.74	9032.51	1.81891	2.11113	0.863073	1.07802	2.12232	2.25429	1.08564	1.17267
	0.456769	0.742398	0.889793	0.273679					382	2610002J02Rik	15482.8	25085.4	25123.1			1.62021	1.62264			0.696181	0.698345									Gm15444	27890.5	38278.8	46659.6	7468.2	13837.9	9028.21	1.37246	1.67295	0.456769	0.742398	1.85291	1.20889	0.889793	0.273679
	0.520938	0.337056	0.979128	0.062682					383	2610005L07Rik	53066.7	68998.8	62672.4			1.30023	1.18101			0.378764	0.240022									Snx5	34581.8	49621.1	43683	8632.02	17016.1	9015.33	1.43489	1.26318	0.520938	0.337056	1.97127	1.04441	0.979128	0.0626821
	0.395514	0.652586	0.856133	0.246943					384	2610008E11Rik	4646.99	14267	12172.8			3.07017	2.6195			1.61832	1.38929									Pcna	36570.3	48105	57488	7597.04	13752	9015.33	1.31541	1.57198	0.395514	0.652586	1.81018	1.18669	0.856133	0.246943
	0.9575	0.920878	0.669915	0.627331					385	2610015P09Rik	8843.02	12124	15780.8			1.37102	1.78455			0.455251	0.835563									Cnn3	24579.2	47731.4	46535	5836.28	9285.4	9015.33	1.94194	1.89327	0.9575	0.920878	1.59098	1.5447	0.669915	0.627331
	0.852137	0.822847	1.35235	0.722537					386	2610018G03Rik	4513.85	3367.05	12533.6			0.745938	2.7767			-0.422873	1.47337									Tpi1	28818.2	52021.8	50976.3	5458.36	13936.7	9006.74	1.80517	1.76889	0.852137	0.822847	2.55327	1.65008	1.35235	0.722537
	0.800082	0.993175	0.902281	0.548456					387	2610019E17Rik	28088.1	47718.5	47939.6			1.69889	1.70676			0.764591	0.771258									E130012A19Rik	27585.6	48032	54910.8	6158.37	11510.1	9006.74	1.7412	1.99056	0.800082	0.993175	1.86902	1.46252	0.902281	0.548456
	0.794305	0.844467	0.879593	0.473265					388	2610019F03Rik	7627.59	16633.4	15020.6			2.18069	1.96924			1.12478	0.977641									2410002F23Rik	27121.8	47035.7	48699.8	6484.75	11931	9002.44	1.73424	1.7956	0.794305	0.844467	1.83986	1.38825	0.879593	0.473265
	0.831656	0.780743	0.634419	0.364024					389	2610020C07Rik	17016	25673.8	27983.7			1.5088	1.64455			0.593399	0.717692									Rpl11	20593.6	36651.1	35380.2	6991.51	10853	8998.15	1.77973	1.71802	0.831656	0.780743	1.55231	1.28701	0.634419	0.364024
	0.717873	1.27951	-0.27386	0.775414					390	2610020H08Rik	12399.1	27297.2	32635.5			2.20154	2.63208			1.13851	1.3962									Gm11031	10603.9	17440.8	25741.6	5239.34	4333.47	8968.08	1.64476	2.42756	0.717873	1.27951	0.827102	1.71168	-0.273862	0.775414
	0.74676	0.801047	0.627875	0.616938					391	2610021A01Rik	11441.4	25085.4	31986.9			2.19251	2.79572			1.13259	1.48322									Asxl2	22238.5	37316.7	38747.7	5844.87	9032	8963.79	1.67802	1.74237	0.74676	0.801047	1.54529	1.53362	0.627875	0.616938
	0.804829	0.932279	0.733781	0.477185					392	2610021K21Rik	9800.77	20150.8	22709.1			2.05604	2.31708			1.03987	1.2123									Pdia3	30231.2	52812.1	57689.8	6433.22	10698.4	8955.2	1.74694	1.90829	0.804829	0.932279	1.66299	1.39202	0.733781	0.477185
	0.794591	0.749745	0.582024	0.388853					393	2610027L16Rik	11325.4	23363.2	23718.5			2.0629	2.09427			1.04467	1.06645									Pcf11	25214.9	43737.3	42398.7	6819.73	10208.8	8929.43	1.73459	1.6815	0.794591	0.749745	1.49695	1.30935	0.582024	0.388853
	0.94727	1.14086	0.364059	0.590009					394	2610029G23Rik	4213.21	7343.95	11610.1			1.74308	2.75565			0.801636	1.46239									Ldlr	21255	40984.4	46870.1	5926.46	7627.6	8920.84	1.92822	2.20513	0.94727	1.14086	1.28704	1.50526	0.364059	0.590009
	0.671421	1.01709	0.824157	0.960422					395	2610029I01Rik	5368.52	8559.36	7911.9			1.59436	1.47376			0.672979	0.5595									2810008D09Rik	18188.5	28967.8	36810.5	4582.27	8112.91	8916.54	1.59264	2.02383	0.671421	1.01709	1.7705	1.94588	0.824157	0.960422
	0.967258	1.1494	-0.07628	0.315862					396	2610034B18Rik	3470.21	5918.11	4604.54			1.7054	1.32688			0.770114	0.408034									Gm14966	18776.9	36711.2	41651.3	7163.29	6794.4	8916.54	1.95512	2.21822	0.967258	1.1494	0.948503	1.24475	-0.0762762	0.315862
	0.519052	0.295062	0.996745	0.096486					397	2610035D17Rik	10938.9	30900.4	40324.1			2.82482	3.6863			1.49816	1.88217									8430406I07Rik	35088.6	50282.5	43051.6	8335.7	16633.8	8912.25	1.43301	1.22694	0.519052	0.295062	1.99549	1.06917	0.996745	0.0964863
	0.965895	1.0634	1.0019	0.37813					398	2610035F20Rik	3478.8	14898.4	11863.5			4.28261	3.41024			2.09849	1.76987									4933424B01Rik	27602.8	53915.8	57685.6	6854.08	13726.2	8907.95	1.95327	2.08985	0.965895	1.0634	2.00264	1.29966	1.0019	0.37813
	0.478725	0.822821	0.019235	0.266417					399	2610039C10Rik	11729.1	30264.8	26609.2			2.58031	2.26864			1.36754	1.18183									Elk4	25416.7	35418.5	44958.7	7395.2	7494.46	8895.07	1.39351	1.76886	0.478725	0.822821	1.01342	1.20282	0.0192354	0.266417
	0.174376	0.346278	0.135795	0.068221					400	2610101N10Rik	12012.6	21898.7	23014.1			1.82298	1.91583			0.866298	0.937969									Mt1	36162.3	40808.3	45972.3	8447.36	9281.1	8856.41	1.12848	1.27128	0.174376	0.346278	1.0987	1.04842	0.135795	0.0682215
	0.607416	0.774415	0.341553	0.520154					401	2610109H07Rik	3504.57	6210.15	5356.21			1.77201	1.52835			0.825391	0.611975									L1td1	24239.9	36930.2	41462.3	6175.55	7825.16	8856.41	1.52353	1.7105	0.607416	0.774415	1.26712	1.43411	0.341553	0.520154
	1.03093	1.14052	0.895334	1.00368					402	2610204G22Rik	7661.95	12257.1	10875.6			1.59974	1.41944			0.677834	0.505317									Fignl1	18703.9	38218.6	41234.7	4414.79	8211.69	8852.11	2.04335	2.2046	1.03094	1.14052	1.86004	2.0051	0.895334	1.00368
	0.770025	0.888647	1.23463	1.04715					403	2610206C17Rik	16616.6	32811.6	36982.3			1.97462	2.22562			0.981576	1.15421									BC027231	27023	46082.2	50031.4	4281.66	10075.6	8847.82	1.7053	1.85144	0.770025	0.888647	2.35321	2.06645	1.23463	1.04715
	0.656997	0.843411	1.25632	0.818078					404	2610301B20Rik	9813.65	13773.1	18023			1.40347	1.83652			0.488995	0.876976									Pafah1b1	34040.7	53675.3	61078.8	5016.02	11982.5	8843.52	1.5768	1.79429	0.656997	0.843411	2.38885	1.76306	1.25632	0.818078
	0.950906	0.883318	-0.11104	0.311804					405	2610301G19Rik	7743.55	13962.1	15506			1.80306	2.00243			0.850449	1.00175									Rpl22l1	22994.4	44450.2	42415.8	7124.64	6596.84	8843.52	1.93309	1.84461	0.950906	0.883318	0.925919	1.24126	-0.111042	0.311804
	0.530093	0.354738	0.729775	-0.11244					406	2610305D13Rik	3345.66	4041.32	3573.67			1.20793	1.06815			0.272536	0.0951156									Gm13034	33280.5	48057.8	42557.6	9551.06	15839.3	8834.93	1.44402	1.27875	0.530093	0.354738	1.65838	0.925021	0.729775	-0.112442
	0.783458	0.844836	0.721589	0.30103					407	2610318N02Rik	12270.3	15061.5	23911.8			1.22748	1.94876			0.295702	0.962555									Rbm39	23900.6	41139	42927	7167.59	11819.3	8830.64	1.72125	1.79606	0.783458	0.844836	1.649	1.23202	0.721589	0.30103
	0.714681	0.806386	1.49356	1.52058					408	2610507B11Rik	20958.7	41263.6	47918.1			1.9688	2.28631			0.97732	1.19302									Nanp	22058.2	36200.1	38575.9	3074.89	8658.35	8822.05	1.64112	1.74882	0.714681	0.806386	2.81582	2.86906	1.49356	1.52058
	0.982176	1.28082	0.273666	0.343749					409	2610507I01Rik	6360.62	14275.6	17597.8			2.24438	2.76667			1.16631	1.46815									Kpnb1	17698.9	34963.2	43004.3	6931.39	8379.19	8796.28	1.97544	2.42977	0.982176	1.28082	1.20888	1.26905	0.273666	0.343749
	0.552146	0.59496	0.66511	0.205053					410	2610524H06Rik	19713.2	35302.5	43618.5			1.79081	2.21266			0.840609	1.14578									Rpl14	28229.8	41392.4	42639.2	7627.1	12094.2	8791.98	1.46627	1.51043	0.552146	0.59496	1.58569	1.15273	0.66511	0.205053
	0.533129	1.01392	0.365168	0.412624					411	2610528E23Rik	5823.77	7734.77	11034.6			1.32814	1.89475			0.409405	0.922004									Traf4	26426	38240.1	53364.5	6592.12	8490.86	8774.8	1.44706	2.01939	0.533129	1.01392	1.28803	1.3311	0.365168	0.412624
	1.15451	0.959877	1.63224	1.40207					412	2700007P21Rik	13606	25579.3	25483.9			1.88	1.87299			0.910736	0.905345									Pigyl	20434.7	45489.6	39748.5	3315.38	10277.5	8761.92	2.22609	1.94514	1.15451	0.959877	3.09995	2.64281	1.63224	1.40207
	-0.36494	0.463463	0.047543	0.665852					413	2700012I20Rik	7524.51	11368.1	18791.8			1.51081	2.49742			0.595322	1.32044									Apoe	30768	23891.5	42424.4	5522.78	5707.81	8761.92	0.776503	1.37885	-0.364937	0.463463	1.0335	1.58651	0.0475427	0.665852
	0.940028	0.940452	1.44816	1.10062					414	2700016F22Rik	8383.48	18188.1	15454.4			2.16952	1.84343			1.11737	0.882397									Mlf2	27598.5	52949.5	52965.1	4079.81	11132.2	8749.03	1.91857	1.91913	0.940028	0.940452	2.7286	2.14447	1.44816	1.10062
	0.731432	1.01916	0.986864	0.515254					415	2700023E23Rik	32739.4	44519	44378.8			1.3598	1.35552			0.443393	0.438844									Ybx1	25743.1	42740.9	52174.7	6115.42	12120	8740.44	1.66029	2.02674	0.731432	1.01916	1.98187	1.42925	0.986864	0.515254
	0.816508	0.734251	0.458516	0.162143					416	2700029M09Rik	15946.6	37406.9	30625.3			2.34575	1.92049			1.23005	0.941472									Ppp1r15a	27658.6	48710.6	46011	7807.47	10728.5	8736.15	1.76114	1.66353	0.816508	0.734251	1.37413	1.11895	0.458516	0.162143
	0.427151	0.573231	0.647133	0.238408					417	2700038G22Rik	18600.8	28246.3	35247			1.51855	1.89492			0.602695	0.922134									Rps27	27044.5	36363.3	40238.2	7390.9	11574.5	8718.97	1.34458	1.48785	0.427151	0.573231	1.56605	1.17969	0.647133	0.238408
	0.978825	0.988689	0.259325	0.195461					418	2700046G09Rik	12910.2	20253.8	23233.2			1.56882	1.7996			0.649684	0.847672									Poldip3	21701.7	42771	43064.4	7614.22	9113.6	8718.97	1.97086	1.98438	0.978825	0.988689	1.19692	1.14509	0.259325	0.195461
	0.462283	0.618167	0.45313	0.454635					419	2700049A03Rik	5591.85	5205.19	7907.6			0.930853	1.41413			-0.103375	0.499914									Atf4	20078.3	27662.2	30818.6	6355.92	8701.3	8710.38	1.37772	1.53492	0.462283	0.618167	1.36901	1.37044	0.45313	0.454635
	0.933993	0.921041	0.615144	0.852161					420	2700050L05Rik	17381.1	30702.9	34701.5			1.76645	1.99651			0.820854	0.997479									Zmym1	18592.2	35521.5	35204.1	4822.77	7387.09	8706.08	1.91056	1.89348	0.933993	0.921041	1.53171	1.8052	0.615144	0.852161
	0.758481	1.01533	0.676814	0.601969					421	2700060E02Rik	13889.4	24187.8	27721.7			1.74145	1.99589			0.800293	0.997029									D030056L22Rik	20718.2	35049.1	41878.9	5733.21	9165.14	8701.79	1.69171	2.02136	0.758481	1.01533	1.59861	1.51779	0.676814	0.601969
	1.13574	1.51439	0.298529	0.571658					422	2700062C07Rik	6034.21	13330.8	12653.9			2.2092	2.09702			1.14352	1.06834									Utp18	17625.9	38729.7	50353.5	5849.16	7193.82	8693.2	2.19731	2.85679	1.13574	1.51439	1.22989	1.48623	0.298529	0.571658
	1.09257	0.95895	1.12471	0.698209					423	2700073G19Rik	19743.3	27769.6	30208.7			1.40654	1.53008			0.492146	0.613603									Gm2885	20439	43587	39731.3	5355.29	11677.6	8688.9	2.13254	1.94389	1.09257	0.95895	2.18057	1.62249	1.12471	0.698209
	-0.12718	0.104468	0.086018	0.24183					424	2700078E11Rik	18137	27739.5	33554.7			1.52944	1.85007			0.613008	0.887579									A530032D15Rik	5956.91	5454.28	6404.26	7347.96	7799.39	8688.9	0.915622	1.0751	-0.127175	0.104468	1.06144	1.18249	0.0860175	0.24183
	0.672499	0.846376	0.549341	0.125316					425	2700081L22Rik	10071.3	14365.8	12731.2			1.4264	1.2641			0.512383	0.338113									Hnrnpa3	20177	32158.8	36277.9	7962.08	11651.8	8684.61	1.59383	1.79798	0.672499	0.846376	1.46342	1.09075	0.549341	0.125316
	0.895912	1.3989	1.11129	1.28406					426	2700081O15Rik	3912.58	8056.88	10068.1			2.05922	2.57327			1.0421	1.3636									Klhl11	16633.8	30952	43863.4	3564.47	7700.61	8680.31	1.86079	2.637	0.895912	1.3989	2.16038	2.43523	1.11129	1.28406
	0.578893	0.699442	0.386023	0.115354					427	2700089E24Rik	18661	36861.5	30943.2			1.97533	1.65818			0.98209	0.729597									Rps13	28122.4	42006.6	45667.4	8009.32	10466.5	8676.02	1.4937	1.62388	0.578893	0.699442	1.30679	1.08324	0.386023	0.115354
	0.896707	1.30824	0.794635	0.59122					428	2700094K13Rik	25575.6	37029	39465			1.44782	1.54307			0.533886	0.625805									D630032N06Rik	20954.4	39013.1	51891.2	5758.98	9989.75	8676.02	1.86181	2.47639	0.896707	1.30824	1.73464	1.50652	0.794635	0.59122
	0.896707	1.30824	0.794635	0.59122					429	2700097O09Rik	16724	25459	33726.5			1.5223	2.01665			0.606257	1.01196									D630032N06Rik	20954.4	39013.1	51891.2	5758.98	9989.75	8676.02	1.86181	2.47639	0.896707	1.30824	1.73464	1.50652	0.794635	0.59122
	0.899359	1.29353	0.633088	1.39464					430	2810001G20Rik	9178.02	14146.8	21162.8			1.54137	2.30582			0.624218	1.20528									Jup	16131.3	30088.7	39542.3	3298.21	5115.13	8671.72	1.86524	2.45128	0.899359	1.29353	1.55088	2.62922	0.633088	1.39463
	0.544512	0.64972	0.064727	-0.15626					431	2810002D19Rik	8714.18	11054.6	15579			1.26857	1.78777			0.343207	0.838163									Ctsl	31197.5	45502.4	48944.7	9654.12	10097.1	8663.13	1.45853	1.56886	0.544512	0.64972	1.04589	0.897351	0.0647272	-0.156256
	0.889406	1.16317	0.752928	0.631656					432	2810002N01Rik	14297.4	32536.7	28052.5			2.2757	1.96206			1.18631	0.97237									Poldip2	26460.3	49015.5	59257.6	5591.49	9422.83	8663.13	1.85241	2.23949	0.889406	1.16317	1.68521	1.54934	0.752928	0.631656
	1.23565	1.2514	1.01541	1.17908					433	2810004N23Rik	29556.9	41349.5	35410.2			1.39898	1.19804			0.484373	0.260672									Vmp1	15306.7	36045.5	36441.1	3822.14	7726.38	8654.54	2.35488	2.38073	1.23565	1.2514	2.02148	2.26432	1.01541	1.17908
	0.575496	0.827516	0.19793	0.501601					434	2810006K23Rik	17059	30226.2	31755			1.77186	1.86148			0.825265	0.89645									Orc1	25704.5	38304.5	45615.8	6106.83	7004.85	8645.95	1.49019	1.77463	0.575496	0.827516	1.14705	1.41578	0.19793	0.501601
	1.24927	1.38885	0.382074	0.391507					435	2810008D09Rik	18188.5	28967.8	36810.5			1.59264	2.02383			0.671421	1.01709									Zfp207	14924.5	35478.6	39082.7	6587.82	8585.34	8641.66	2.37721	2.6187	1.24927	1.38885	1.30321	1.31176	0.382074	0.391507
	0.466577	0.912414	0.604326	0.757126					436	2810011L19Rik	9555.96	11986.5	21927.4			1.25435	2.29463			0.326941	1.19826									1110002N22Rik	16668.2	23032.5	31372.7	5110.5	7769.33	8637.36	1.38183	1.88219	0.466577	0.912414	1.52027	1.69012	0.604326	0.757126
	0.65569	0.371281	0.019158	0.652764					437	2810021B07Rik	18158.5	29367.2	31845.2			1.61727	1.75374			0.693563	0.810432									Eif1a	19734.7	31089.4	25526.8	5488.42	5561.79	8628.77	1.57537	1.2935	0.65569	0.371281	1.01337	1.57218	0.0191584	0.652764
	1.00723	1.32425	0.908585	0.891515					438	2810021J22Rik	7129.39	14636.4	18675.9			2.05296	2.61956			1.03771	1.38932									Ccdc88a	20001	40202.8	50082.9	4646.69	8722.78	8620.18	2.01004	2.50403	1.00723	1.32425	1.8772	1.85512	0.908585	0.891515
	0.926079	1.34914	0.899937	0.688351					439	2810025M15Rik	14825.7	28254.9	34641.4			1.90581	2.33658			0.930401	1.2244									Mis12	19915	37840.7	50735.8	5346.7	9976.86	8615.89	1.90011	2.54761	0.926079	1.34914	1.86598	1.61144	0.899937	0.688351
	0.58348	0.930297	0.763218	0.337855					440	2810029C07Rik	7485.86	11058.9	15836.7			1.4773	2.11555			0.562965	1.08103									5830403L16Rik	27121.8	40640.8	51685.1	6806.84	11553.1	8603	1.49846	1.90567	0.58348	0.930297	1.69727	1.26388	0.763218	0.337855
	0.664008	0.865952	0.4894	0.651942					441	2810032G03Rik	4299.11	4801.49	8199.68			1.11686	1.9073			0.159444	0.93153									Baz2a	25408.1	40258.6	46307.4	5466.95	7674.84	8590.12	1.58448	1.82254	0.664008	0.865952	1.40386	1.57128	0.4894	0.651942
	0.728416	0.794422	0.811372	0.792088					442	2810046L04Rik	12940.3	11033.1	22825.1			0.852618	1.76388			-0.230029	0.818752									Sf3b4	25545.6	42324.4	44305.8	4955.9	8697.01	8581.53	1.65682	1.73438	0.728416	0.794422	1.75488	1.73158	0.811372	0.792088
	0.766882	1.03054	0.458475	0.413046					443	2810055F11Rik	13885.1	22156.4	30178.6			1.59569	2.17345			0.674183	1.11999									Rabif	23707.4	40340.2	48429.2	6441.81	8851.62	8577.23	1.70159	2.04279	0.766882	1.03054	1.37409	1.33149	0.458475	0.413046
	0.401867	0.898774	0.524621	0.941425					444	2810403A07Rik	21671.6	36517.9	35715.2			1.68506	1.64802			0.752797	0.720731									Ipmk	28195.5	37252.3	52569.9	4466.32	6425.05	8577.23	1.32122	1.86448	0.401867	0.898774	1.43856	1.92042	0.524621	0.941425
	0.524969	1.02107	0.108347	0.236853					445	2810403D21Rik	4569.68	9508.49	12001			2.08078	2.62622			1.05712	1.39299									Mycn	19412.6	27932.8	39396.3	7274.95	7842.34	8572.94	1.4389	2.02942	0.524969	1.02107	1.07799	1.17842	0.108347	0.236853
	0.711341	1.05731	0.613149	0.503217					446	2810405K02Rik	11364.1	23994.5	22503			2.11144	1.98018			1.07823	0.985633									Psmd12	16367.5	26799	34061.5	6042.42	9242.45	8564.35	1.63733	2.08104	0.711341	1.05731	1.52959	1.41737	0.613149	0.503217
	0.401857	0.847128	0.871524	1.28039					447	2810407C02Rik	29260.6	44729.4	47806.4			1.52866	1.63382			0.612266	0.708246									Dync1h1	23557.1	31123.8	42377.2	3525.82	6450.82	8564.35	1.32121	1.79892	0.401857	0.847128	1.82959	2.42904	0.871524	1.28038
	0.357825	0.605824	0.068106	0.682015					448	2810408A11Rik	12150	18261.1	32742.9			1.50297	2.69488			0.587815	1.43022									Higd1a	34264	43909.1	52144.7	5338.11	5596.15	8564.35	1.28149	1.52185	0.357825	0.605824	1.04834	1.60438	0.0681056	0.682015
	0.584162	0.937756	0.750139	0.334278					449	2810408I11Rik	15843.6	29728	39963.2			1.87634	2.52236			0.907924	1.33478									Glul	26988.6	40460.5	51697.9	6789.67	11419.9	8560.05	1.49917	1.91555	0.584162	0.937756	1.68196	1.26075	0.750139	0.334278
	0.828267	1.26873	1.24961	1.4791					450	2810408M09Rik	13661.8	24282.3	21278.8			1.77739	1.55754			0.829757	0.639269									Fxr2	15521.5	27559.2	37399	3070.6	7301.19	8560.05	1.77555	2.4095	0.828267	1.26873	2.37777	2.78775	1.24961	1.4791
	0.448906	0.394913	-0.16118	-0.002					451	2810410L24Rik	7314.07	19090	21721.2			2.61004	2.96978			1.38407	1.57036									Klf5	26460.3	36118.5	34791.7	8567.61	7661.96	8555.76	1.365	1.31486	0.448906	0.394913	0.894294	0.998617	-0.161179	-0.0019968
	0.888605	0.883943	0.79611	1.18249					452	2810417H13Rik	10402	13502.6	18070.2			1.29807	1.73718			0.376368	0.796748									Rsrc2	20726.8	38373.2	38249.4	3762.02	6532.42	8538.58	1.85138	1.84541	0.888605	0.883943	1.73641	2.26968	0.79611	1.18249
	0.54911	0.895868	0.792407	0.514645					453	2810422J05Rik	18201.4	31596.2	36247.8			1.73592	1.99148			0.795699	0.993844									Hist1h2aj	23003	33657.6	42802.4	5973.7	10346.2	8534.28	1.46318	1.86073	0.54911	0.895868	1.73196	1.42864	0.792407	0.514645
	0.447762	0.592439	0.746644	0.376508					454	2810422O20Rik	8349.12	16362.8	17623.5			1.95983	2.11082			0.970727	1.07781									Dzip3	29264.9	39915	44125.4	6570.65	11024.8	8529.99	1.36392	1.50779	0.447762	0.592439	1.67789	1.2982	0.746644	0.376508
	0.640692	0.770584	0.561854	0.322829					455	2810428I15Rik	26829.7	43720.1	44580.7			1.62954	1.66162			0.704467	0.732587									Srsf10	23866.3	37209.4	40714.9	6819.73	10067	8529.99	1.55908	1.70596	0.640692	0.770584	1.47617	1.25078	0.561854	0.322829
	0.644384	1.00379	1.08886	0.837455					456	2810429I04Rik	7241.06	8078.35	7426.53			1.11563	1.02561			0.15786	0.0364874									Ulk1	25519.8	39889.3	51173.9	4771.23	10148.7	8525.69	1.56307	2.00526	0.644384	1.00379	2.12705	1.7869	1.08886	0.837455
	0.36729	0.940167	0.973542	0.74884					457	2810432D09Rik	15281	29612	31772.2			1.93784	2.0792			0.954449	1.05603									Ubb	16767	21628.2	32171.6	5063.26	9942.5	8508.51	1.28993	1.91875	0.36729	0.940167	1.96366	1.68044	0.973542	0.74884
	0.983958	1.27352	0.863961	1.1466					458	2810432L12Rik	5634.8	3336.99	10377.4			0.592211	1.84166			-0.755817	0.881007									Gnai3	14791.3	29255.6	35758.2	3839.32	6987.67	8499.92	1.97788	2.41751	0.983958	1.27352	1.82003	2.21391	0.863961	1.1466
	0.164466	0.697522	-0.12558	-0.50378					459	2810442I21Rik	14520.8	31523.2	28494.9			2.1709	1.96235			1.11829	0.972584									2900002K06Rik	30901.2	34632.5	50113	12046.2	11042	8495.62	1.12075	1.62172	0.164466	0.697522	0.916637	0.705254	-0.125577	-0.503785
	1.02994	0.94649	0.726312	0.365038					460	2810453I06Rik	13833.6	29990	29362.5			2.16791	2.12255			1.1163	1.0858									Ppp1r2	24347.3	49715.6	46921.6	6596.41	10913.1	8495.62	2.04193	1.92718	1.02994	0.94649	1.6544	1.28792	0.726312	0.365038
	0.126055	-0.00801345	0.325265	-0.43119					461	2810468N07Rik	3921.17	5935.29	8328.54			1.51365	2.12399			0.598034	1.08678									Gm10557	12931.7	14112.4	12860.1	11449.2	14344.7	8491.33	1.09131	0.994461	0.126055	-0.00801345	1.25289	0.74165	0.325265	-0.431189
	0.305598	0.675356	0.03796	-0.26079					462	2810474O19Rik	22917.1	38270.2	46552.2			1.66994	2.03133			0.739794	1.02242									Rbm3	31051.5	38377.5	49589	10173.8	10445	8491.33	1.23593	1.59699	0.305598	0.675356	1.02666	0.83463	0.0379595	-0.260791
	1.02176	1.40428	1.16751	1.49189					463	2900002K06Rik	30901.2	34632.5	50113			1.12075	1.62172			0.164466	0.697522									Plscr3	14812.8	30075.8	39207.3	3019.06	6781.52	8491.33	2.03039	2.64685	1.02176	1.40428	2.24624	2.81257	1.16751	1.49189
	0.72243	0.846603	0.372064	0.815955					464	2900005J15Rik	4449.43	3233.92	5171.51			0.726817	1.16229			-0.460337	0.216965									Zc3h15	20013.8	33022	35990.1	4818.47	6236.08	8482.74	1.64996	1.79826	0.72243	0.846603	1.2942	1.76046	0.372064	0.815955
	0.866658	1.02835	1.17358	0.598729					465	2900006K08Rik	4874.61	9328.11	10798.3			1.91361	2.21522			0.936298	1.14745									Clic4	24914.2	45429.4	50817.4	5595.78	12622.5	8474.15	1.82343	2.0397	0.866658	1.02835	2.25571	1.51438	1.17358	0.598729
	0.371712	0.395419	0.533831	0.198156					466	2900008C10Rik	4350.65	4092.86	8886.93			0.940747	2.04267			-0.0881216	1.03045									Rpl36	31708.6	41027.4	41707.1	7386.61	10694.1	8474.15	1.29389	1.31533	0.371712	0.395419	1.44777	1.14723	0.533831	0.198156
	0.967806	0.967267	0.769691	0.727888					467	2900010M23Rik	20799.8	28714.4	31883.8			1.38052	1.53289			0.465207	0.616256									Psme3	21723.2	42487.6	42471.7	5106.21	8705.6	8456.97	1.95586	1.95513	0.967806	0.967267	1.7049	1.65621	0.769691	0.727888
	0.776487	0.864965	0.953617	0.919666					468	2900011O08Rik	4054.3	6729.81	8328.54			1.65992	2.05425			0.731113	1.03861									Gm10010	24751	42397.4	45078.9	4470.62	8658.35	8456.97	1.71295	1.8213	0.776487	0.864965	1.93672	1.89168	0.953617	0.919666
	0.976118	1.26026	0.420799	0.784078					469	2900041M22Rik	5394.29	9177.79	15063.5			1.70139	2.7925			0.766714	1.48155									Cox11	17814.9	35044.8	42673.6	4908.66	6571.07	8452.67	1.96717	2.39539	0.976118	1.26026	1.33867	1.72199	0.420799	0.784078
	1.1183	0.972584	0.528306	1.26145					470	2900052L18Rik	12330.4	33236.8	31102.1			2.69551	2.52239			1.43056	1.33479									2810442I21Rik	14520.8	31523.2	28494.9	3525.82	5085.06	8452.67	2.1709	1.96235	1.11829	0.972584	1.44223	2.39736	0.528306	1.26145
	0.921766	1.43239	0.107349	0.375902					471	2900053A13Rik	6150.17	7889.38	6408.55			1.28279	1.04201			0.359286	0.0593717									Map2k3	19210.7	36393.4	51848.3	6510.52	7013.44	8448.38	1.89443	2.69893	0.921766	1.43239	1.07725	1.29765	0.107349	0.375902
	0.585427	0.618902	0.12839	0.857147					472	2900053O20Rik	8138.67	11677.3	16682.8			1.43479	2.04983			0.520844	1.0355									Ube2k	24772.5	37170.7	38043.3	4663.87	5097.95	8448.38	1.50048	1.53571	0.585427	0.618902	1.09307	1.81145	0.12839	0.857147
	0.56122	0.738642	0.571868	0.497544					473	2900056M20Rik	6717.09	16530.3	18285			2.46094	2.72216			1.29921	1.44475									Bsg	30128.1	44454.5	50271.9	5978	8885.98	8439.79	1.47552	1.6686	0.56122	0.738642	1.48645	1.41181	0.571868	0.497544
	1.15498	1.06974	0.65796	0.485749					474	2900064A13Rik	16526.5	26872	29212.2			1.626	1.7676			0.701327	0.821793									Anapc16	21031.7	46833.8	44146.8	6020.94	9500.14	8431.2	2.22682	2.09906	1.15498	1.06974	1.57785	1.40031	0.65796	0.485749
	0.70619	1.15533	0.457495	0.836307					475	2900089D17Rik	4750.06	5505.82	6082.11			1.15911	1.28043			0.213012	0.356626									Smurf2	22938.6	37424.1	51092.3	4719.7	6480.88	8426.9	1.63149	2.22735	0.70619	1.15533	1.37316	1.78547	0.457495	0.836307
	0.291557	0.570002	1.14901	0.746252					476	2900097C17Rik	7451.5	9706.04	9947.86			1.30256	1.33501			0.381352	0.416855									Gm11613	22663.7	27739.5	33644.9	5016.02	11123.6	8414.02	1.22396	1.48453	0.291557	0.570002	2.21761	1.67743	1.14901	0.746252
	1.02489	1.04411	1.09156	0.802196					477	3000002C10Rik	8155.85	24887.8	21622.4			3.05153	2.65115			1.60953	1.40662									Nfe2l2	23531.3	47881.7	48523.7	4822.77	10277.5	8409.72	2.03481	2.06209	1.02489	1.04411	2.13104	1.74375	1.09156	0.802196
	0.73153	0.623115	0.857055	0.568635					478	3010003L21Rik	10148.6	13992.2	18817.6			1.37872	1.8542			0.463331	0.890795									Gnpat	27358	45425.1	42136.7	5664.5	10260.3	8401.13	1.6604	1.5402	0.73153	0.623115	1.81134	1.48312	0.857055	0.568635
	0.92435	0.969862	0.522379	0.26868					479	3010026O09Rik	6545.3	13446.7	12400.5			2.05441	1.89456			1.03873	0.921862									Rnf10	23046	43737.3	45139.1	6970.04	10011.2	8396.84	1.89783	1.95865	0.92435	0.969862	1.43632	1.2047	0.522379	0.26868
	0.723871	0.858571	0.28091	0.569348					480	3110001D03Rik	7709.19	15314.9	20080.4			1.98658	2.60474			0.990288	1.38114									Slc16a1	25545.6	42191.2	46320.3	5655.91	6871.71	8392.54	1.65161	1.81324	0.723871	0.858571	1.21496	1.48385	0.28091	0.569348
	1.37181	1.43374	0.594601	0.755756					481	3110001I22Rik	12162.9	25579.3	22816.5			2.10306	1.87591			1.07249	0.90759									Tatdn2	16470.6	42625	44494.8	4960.19	7490.16	8375.36	2.58794	2.70146	1.37181	1.43374	1.51006	1.68852	0.594601	0.755756
	0.421324	0.684711	1.07464	1.4256					482	3110002H16Rik	15130.6	29105.2	32858.9			1.9236	2.17168			0.943807	1.11881									Asap2	23716	31759.4	38120.6	3117.84	6566.78	8375.36	1.33916	1.60738	0.421324	0.684711	2.1062	2.68627	1.07464	1.4256
	0.79521	1.01445	0.953263	0.566364					483	3110003A17Rik	8916.03	12944.3	17121			1.4518	1.92025			0.537839	0.941291									Rps3	20920	36303.2	42261.2	5647.32	10934.6	8362.48	1.73533	2.02013	0.79521	1.01445	1.93625	1.48079	0.953263	0.566364
	0.560289	0.609072	0.630954	0.294216					484	3110009E18Rik	11252.4	17247.5	25213.3			1.53279	2.2407			0.616157	1.16395									1810013L24Rik	30098.1	44381.5	45907.9	6819.73	10561	8362.48	1.47456	1.52528	0.560289	0.609072	1.54859	1.22622	0.630954	0.294216
	0.926737	0.73104	0.943922	0.332339					485	3110021A11Rik	22887.1	38622.3	49657.7			1.68752	2.16968			0.754902	1.11748									Asah1	25730.2	48912.4	42707.9	6635.06	12764.2	8353.89	1.90097	1.65983	0.926737	0.73104	1.92375	1.25905	0.943922	0.332339
	0.476702	0.733946	0.283754	-0.00796					486	3110040N11Rik	18021	30844.6	34422.3			1.71159	1.91012			0.775336	0.933663									Rpl37a	24622.2	34263.2	40951.2	8400.12	10226	8353.89	1.39156	1.66318	0.476702	0.733946	1.21736	0.994497	0.283754	-0.00796179
	0.97456	1.10684	0.22476	0.840178					487	3110043A19Rik	4866.02	7391.2	13908.1			1.51894	2.85821			0.603066	1.51511									Hmgn1	17346.8	34087.1	37360.3	4663.87	5450.12	8349.59	1.96504	2.15373	0.97456	1.10684	1.16858	1.79027	0.22476	0.840178
	0.413055	0.57679	0.564351	0.445475					488	3110043O21Rik	9564.55	18969.7	22863.8			1.98334	2.39047			0.98793	1.25729									Zfp568	35818.8	47692.8	53424.6	6128.31	9062.07	8345.3	1.3315	1.49153	0.413055	0.57679	1.47872	1.36176	0.564351	0.445475
	0.840609	1.14578	0.527363	0.540135					489	3110045C21Rik	8654.05	15035.8	29749.1			1.73743	3.43759			0.796952	1.7814									2610524H06Rik	19713.2	35302.5	43618.5	5733.21	8263.23	8336.71	1.79081	2.21266	0.840609	1.14578	1.44129	1.45411	0.527363	0.540135
	0.841504	1.15112	0.548623	0.567407					490	3110053B16Rik	18514.9	36049.8	34740.2			1.94706	1.87633			0.961301	0.907916									Gm20499	19446.9	34847.3	43189	5625.85	8228.87	8336.71	1.79192	2.22087	0.841504	1.15112	1.46269	1.48186	0.548623	0.567407
	0.587593	0.867035	0.804436	-0.08295					491	3110056K07Rik	9448.59	22229.4	25376.5			2.35267	2.68574			1.2343	1.42532									Rpl4	23217.8	34890.2	42347.1	8820.98	15405.5	8328.12	1.50274	1.82391	0.587593	0.867035	1.74646	0.944126	0.804436	-0.0829481
	0.552528	0.898086	0.709852	0.152261					492	3110056O03Rik	13210.9	17990.5	23027			1.3618	1.74303			0.445515	0.801601									Pgrmc1	25528.4	37441.3	47574.5	7493.97	12257.4	8328.12	1.46665	1.86359	0.552528	0.898086	1.63564	1.11131	0.709852	0.152261
	1.00079	1.3708	-0.18602	0.358285					493	3110057O12Rik	5527.43	11217.8	12202.9			2.02947	2.2077			1.02111	1.14254									Ube2g1	22659.4	45343.6	58600.4	6493.34	5707.81	8323.82	2.00109	2.58614	1.00079	1.3708	0.879025	1.2819	-0.186023	0.358285
	1.15228	1.06942	0.666414	0.465767					494	3110062M04Rik	13704.8	28362.3	24538.9			2.06952	1.79054			1.0493	0.840395									Ascc1	21001.6	46679.2	44073.8	6020.94	9555.97	8315.23	2.22265	2.09859	1.15228	1.06942	1.58712	1.38105	0.666414	0.465767
	0.788568	1.23602	0.415131	1.04406					495	3110070M22Rik	8237.45	9207.86	15295.5			1.1178	1.85682			0.160668	0.892836									Prorsd1	18244.4	31514.6	42974.2	4032.57	5377.11	8315.23	1.72736	2.35548	0.788568	1.23602	1.33342	2.06202	0.415131	1.04406
	0.883897	1.01407	0.155262	0.50286					496	3110082I17Rik	6923.24	12085.3	21218.7			1.74561	3.06485			0.803735	1.61581									Bcat1	17501.4	32296.2	35345.8	5862.05	6528.12	8306.64	1.84535	2.0196	0.883897	1.01407	1.11362	1.41702	0.155262	0.50286
	0.621398	0.930134	1.35879	1.22157					497	3110083C13Rik	3878.22	5007.63	6958.35			1.29122	1.79421			0.368733	0.843351									Azin1	22255.7	34237.4	42407.3	3560.17	9130.78	8302.35	1.53836	1.90545	0.621398	0.930134	2.5647	2.33201	1.35879	1.22157
	0.87805	1.37769	0.617888	1.41695					498	3222401L13Rik	6480.87	12450.4	11588.6			1.92109	1.78813			0.941928	0.838453									Rabep1	13223.7	24303.8	34362.2	3109.25	4771.54	8302.35	1.83789	2.59853	0.87805	1.37769	1.53463	2.67021	0.617888	1.41695
	1.41962	1.34066	0.538136	0.947279					499	3300002I08Rik	8267.52	16564.7	12860.1			2.00359	1.55549			1.00259	0.637371									Ogg1	14915.9	39902.2	37776.9	4294.54	6236.08	8280.87	2.67514	2.53266	1.41962	1.34066	1.45209	1.92823	0.538136	0.947279
	0.60415	0.754432	0.421591	-0.27998					500	3632451O06Rik	6120.11	12742.4	19784			2.08205	3.23263			1.05801	1.69271									Cfl1	31592.7	48023.4	53295.8	10049.2	13460	8276.58	1.52008	1.68697	0.60415	0.754432	1.3394	0.823604	0.421591	-0.279977
	1.00629	1.38035	0.936284	0.653					501	3830406C13Rik	13962.4	29779.5	33876.8			2.13283	2.42628			1.09277	1.27875									Derl2	19550	39270.8	50894.7	5260.81	10067	8272.28	2.00874	2.60331	1.00629	1.38035	1.91359	1.57243	0.936284	0.653
	0.900728	0.767022	0.469412	-0.57551					502	3830431G21Rik	4165.97	3517.37	14462.2			0.84431	3.47151			-0.244155	1.79556									Rplp1	22968.7	42882.7	39087	12321	17059	8267.99	1.86701	1.70175	0.900728	0.767022	1.38454	0.671047	0.469412	-0.575514
	1.20188	1.40163	0.48757	0.558378					503	4632404H12Rik	6880.29	7008.97	17206.9			1.0187	2.50089			0.0267331	1.32244									C1qbp	13365.5	30745.8	35311.5	5608.67	7863.81	8259.4	2.30039	2.64199	1.20188	1.40163	1.40208	1.47261	0.48757	0.558378
	0.560457	0.975635	0.381241	1.05445					504	4632411B12Rik	18394.7	30909	36174.8			1.68032	1.96659			0.748739	0.975696									Snx6	20769.7	30629.9	40843.8	3976.74	5179.55	8259.4	1.47474	1.96651	0.560457	0.975635	1.30246	2.07693	0.381241	1.05445
	0.741622	0.972479	0.949293	0.696393					505	4632411P08Rik	10848.7	13433.9	14874.5			1.23829	1.37109			0.308351	0.455323									Tmem183a	27688.7	46297	54330.9	5089.03	9826.54	8246.51	1.67205	1.96221	0.741622	0.972479	1.93093	1.62045	0.949293	0.696393
	0.661581	0.521421	0.696374	0.552816					506	4632415K11Rik	6614.01	14133.9	13684.8			2.13696	2.06905			1.09556	1.04897									Eef1e1	24660.8	39008.8	35397.4	5621.55	9109.31	8246.51	1.58181	1.43537	0.661581	0.521421	1.62043	1.46695	0.696374	0.552816
	1.24655	1.51002	1.17173	0.771888					507	4632415L05Rik	4887.5	8082.64	11511.3			1.65374	2.35526			0.72573	1.23589									Ier5	14619.5	34688.4	41638.4	4827.06	10874.5	8242.22	2.37274	2.84813	1.24655	1.51002	2.25282	1.7075	1.17173	0.771888
	0.739794	1.02242	0.483483	0.786077					508	4632419I22Rik	6059.98	15787.4	20132			2.60518	3.32212			1.38138	1.7321									2810474O19Rik	22917.1	38270.2	46552.2	4779.82	6682.74	8242.22	1.66994	2.03133	0.739794	1.02242	1.39812	1.72438	0.483483	0.786077
	0.884602	0.778787	-0.23863	-0.29684					509	4632427E13Rik	9680.51	16444.4	19857.1			1.69872	2.05124			0.764445	1.0365									Tpt1	22689.5	41890.6	38928.1	10109.4	8568.16	8229.33	1.84625	1.71569	0.884602	0.778787	0.847548	0.814032	-0.238633	-0.296843
	0.939853	0.840413	0.880686	0.756618					510	4632428C04Rik	6347.74	13107.5	7409.35			2.0649	1.16724			1.04607	0.223104									Txn1	29256.3	56123.3	52385.2	4865.71	8958.99	8220.74	1.91833	1.79056	0.939853	0.840413	1.84125	1.68953	0.880686	0.756618
	0.949726	0.785532	1.17724	0.760968					511	4632428N05Rik	5664.86	7769.13	15347			1.37146	2.70916			0.455713	1.43785									Rnf170	30557.6	59022.2	52673	4848.53	10964.7	8216.45	1.93151	1.72373	0.949726	0.785532	2.26144	1.69463	1.17724	0.760968
	0.844	0.801459	1.25936	0.90603					512	4632434I11Rik	15302.4	24278	32133			1.58655	2.09986			0.665889	1.07029									Mapk14	29758.8	53417.6	51865.5	4384.72	10496.5	8216.45	1.79502	1.74286	0.844	0.801459	2.39389	1.87388	1.25936	0.90603
	0.792007	0.912721	1.47256	1.06822					513	4731419I09Rik	11063.4	18682	19303			1.68862	1.74475			0.755848	0.803023									Lyrm5	26730.9	46284.1	50323.4	3912.33	10857.3	8203.56	1.73148	1.88259	0.792007	0.912721	2.77515	2.09685	1.47257	1.06822
	1.15095	1.58459	0.615018	1.20953					514	4732414G09Rik	6442.22	3659.09	11872.1			0.567986	1.84286			-0.816073	0.88195									Nt5m	11815	26236.4	35436	3547.29	5432.95	8203.56	2.22059	2.99923	1.15095	1.58459	1.53158	2.31263	0.615018	1.20953
	0.82586	1.17974	0.881863	0.564108					515	4732415M23Rik	10818.6	13554.1	14260.3			1.25285	1.31813			0.32521	0.398487									Zswim7	21156.3	37501.4	47926.7	5539.96	10208.8	8190.68	1.77259	2.26537	0.82586	1.17974	1.84275	1.47847	0.881863	0.564108
	0.754902	1.11748	0.58094	0.856974					516	4732418C07Rik	12304.6	21396.2	25067.2			1.73888	2.03722			0.798155	1.0266									3110021A11Rik	22887.1	38622.3	49657.7	4522.15	6764.34	8190.68	1.68752	2.16968	0.754902	1.11748	1.49582	1.81124	0.58094	0.856974
	-0.8379	-0.728362	-0.39449	0.029985					517	4732440D04Rik	5424.35	5604.6	6425.73			1.03323	1.18461			0.0471611	0.24441									Gm9758	7799.38	4363.43	4707.62	8022.2	6102.94	8190.68	0.559459	0.603589	-0.837897	-0.728362	0.760756	1.021	-0.394494	0.0299853
	0.683923	1.29076	1.02463	1.3297					518	4732463B04Rik	3916.87	6944.55	6954.05			1.77298	1.77541			0.82618	0.828152									Aurkb	18119.8	29109.5	44331.5	3255.26	6622.61	8182.09	1.6065	2.44658	0.683923	1.29076	2.03443	2.5135	1.02463	1.3297
	0.957166	1.2745	0.639044	1.22864					519	4732471D19Rik	18974.5	37664.6	45779.1			1.98501	2.41266			0.989148	1.27063									Slc9a3r1	20864.2	40507.7	50473.8	3491.46	5437.24	8182.09	1.94149	2.41916	0.957166	1.2745	1.5573	2.34346	0.639044	1.22864
	0.613334	0.750421	0.803326	0.857445					520	4732487G21Rik	3886.81	10096.9	8508.94			2.59772	2.18918			1.37725	1.13039									Pmpca	27358	41851.9	46023.9	4513.56	7876.7	8177.79	1.52979	1.68228	0.613334	0.750421	1.74512	1.81183	0.803326	0.857445
	1.06804	1.2251	0.985025	1.21904					521	4732491K20Rik	8821.55	14206.9	14251.7			1.61048	1.61556			0.687488	0.692033									Trnau1ap	19421.2	40718.1	45401.1	3512.93	6953.31	8177.79	2.09659	2.33771	1.06804	1.2251	1.97935	2.32791	0.985025	1.21904
	0.972645	1.20348	0.53928	0.777891					522	4831440E17Rik	6193.12	9774.76	9054.44			1.57833	1.46202			0.658395	0.547959									Lbr	21864.9	42908.4	50353.5	4766.94	6927.54	8173.5	1.96243	2.30294	0.972645	1.20348	1.45325	1.71462	0.53928	0.777891
	1.29915	1.57747	1.35528	1.16386					523	4833403I15Rik	5862.42	6326.11	6889.62			1.0791	1.17522			0.109822	0.232928									H2afv	15981	39326.7	47694.7	3646.06	9328.35	8169.2	2.46084	2.98447	1.29915	1.57747	2.55847	2.24056	1.35528	1.16386
	0.638372	0.975784	0.186548	0.816661					524	4833407H14Rik	8018.42	4926.03	15016.3			0.614339	1.87272			-0.702893	0.905138									Srpk1	21280.8	33125.1	41853.2	4638.1	5278.33	8169.2	1.55657	1.96671	0.638372	0.975784	1.13804	1.76132	0.186548	0.816661
	0.666049	0.863346	0.483157	0.636929					525	4833417C18Rik	11853.7	24205	28409			2.04198	2.39663			1.02997	1.26101									Zfp655	21409.7	33971.2	38949.6	5247.93	7335.55	8160.61	1.58672	1.81925	0.666049	0.863346	1.3978	1.55502	0.483157	0.636929
	0.821881	0.834777	0.241783	0.375498					526	4833418N02Rik	18523.5	33816.5	37759.8			1.8256	2.03848			0.86837	1.02749									Rps29	20323.1	35925.2	36247.8	6287.21	7434.33	8156.32	1.76771	1.78358	0.821881	0.834777	1.18245	1.29729	0.241783	0.375498
	0.734674	0.722685	0.872064	0.531787					527	4833420G17Rik	8568.15	17307.7	21343.2			2.02	2.491			1.01436	1.31672									Tecr	23638.7	39335.2	39009.7	5638.73	10320.5	8152.02	1.66402	1.65025	0.734674	0.722685	1.83028	1.44572	0.872064	0.531787
	0.698759	0.916823	0.657612	0.746297					528	4833428L15Rik	7494.45	6244.51	18203.4			0.833218	2.42891			-0.263234	1.28031									Rfc5	19704.6	31982.7	37201.4	4857.12	7661.96	8147.73	1.62311	1.88795	0.698759	0.916823	1.57747	1.67748	0.657612	0.746297
	-0.13528	0.729009	0.375779	0.892499					529	4833439L19Rik	18115.5	28315	40452.9			1.56302	2.23305			0.644341	1.15902									2410080I02Rik	19150.6	17436.5	31742.1	4389.02	5694.93	8147.73	0.910496	1.6575	-0.135276	0.729009	1.29754	1.85639	0.375779	0.892499
	0.123387	0.713724	0.554823	0.524784					530	4921504A21Rik	3010.66	7232.29	5515.13			2.40223	1.83187			1.26437	0.873315									Gm11335	17887.9	19485.1	29336.7	5660.2	8314.77	8143.43	1.08929	1.64003	0.123387	0.713724	1.46899	1.43872	0.554823	0.524784
	0.89127	1.11067	1.24532	1.2661					531	4921507G05Rik	4994.87	9680.28	9913.5			1.93804	1.98474			0.954602	0.988947									Pold2	19824.9	36771.3	42811	3384.1	8022.72	8139.13	1.85481	2.15946	0.89127	1.11067	2.37071	2.40511	1.24532	1.2661
	0.709761	0.778572	0.856144	0.553476					532	4921507P07Rik	3191.05	4569.57	8251.23			1.432	2.58574			0.518027	1.37058									Ddx59	30617.7	50076.3	52522.6	5539.96	10028.4	8130.54	1.63553	1.71543	0.709761	0.778572	1.81019	1.46762	0.856144	0.553476
	0.714947	1.27033	0.686022	0.846342					533	4921513D23Rik	8288.99	18046.4	15265.4			2.17715	1.84165			1.12244	0.880998									Cct4	17381.1	28529.8	41926.2	4522.15	7275.42	8130.54	1.64142	2.41217	0.714947	1.27033	1.60884	1.79794	0.686022	0.846342
	1.02357	0.952826	0.50367	0.99789					534	4921514A10Rik	3998.47	3667.68	7864.65			0.917271	1.96691			-0.12458	0.975934									Krcc1	17832.1	36251.6	34516.8	4071.22	5772.24	8130.54	2.03295	1.93566	1.02357	0.952826	1.41782	1.99708	0.50367	0.99789
	-0.11701	0.636622	0.444993	0.565069					535	4921517L17Rik	12412	23702.5	30341.8			1.90964	2.44455			0.933302	1.28957									Phc1	13786.4	12712.3	21433.4	5492.72	7477.28	8126.25	0.922096	1.55468	-0.117011	0.636622	1.36131	1.47946	0.444993	0.565069
	0.638296	0.815461	1.0307	0.534167					536	4921522P10Rik	8950.39	9233.63	9032.97			1.03165	1.00923			0.0449474	0.0132499									Mgat2	31416.6	48899.6	55288.8	5608.67	11458.6	8121.95	1.55649	1.75986	0.638296	0.815461	2.04301	1.44811	1.0307	0.534167
	0.335973	0.650087	0.237836	0.068924					537	4921524J17Rik	26829.7	42461.8	36256.4			1.58264	1.35135			0.662334	0.434405									Trpm8	17342.5	21890.1	27214.9	7743.05	9130.78	8121.95	1.26223	1.56926	0.335973	0.650087	1.17922	1.04893	0.237836	0.0689242
	0.788187	0.983691	1.05659	0.510393					538	4921530L18Rik	15315.3	30990.6	20965.2			2.02351	1.36891			1.01686	0.453025									Paip2	23844.8	41177.7	47153.5	5698.85	11853.7	8117.66	1.7269	1.97752	0.788187	0.983691	2.08002	1.42444	1.05659	0.510393
	0.7915	0.896926	1.1793	0.568432					539	4921536K21Rik	3672.07	9942.25	13401.3			2.70753	3.64951			1.43698	1.8677									Dnajb4	27117.5	46936.9	50495.3	5471.24	12390.5	8113.36	1.73087	1.86209	0.7915	0.896926	2.26467	1.48291	1.1793	0.568432
	0.82708	0.917071	0.852655	0.542617					540	4922501C03Rik	5763.64	12141.1	12709.7			2.10651	2.20516			1.07485	1.14088									Snrnp70	23445.4	41594.3	44271.4	5570.02	10058.5	8113.36	1.77409	1.88828	0.82708	0.917071	1.80582	1.45661	0.852655	0.542617
	0.597999	0.815012	0.822321	0.29036					541	4922505G16Rik	14460.6	20623.2	23727.1			1.42616	1.64081			0.512137	0.714404									Etnk1	31773	48092.2	55898.7	6630.77	11724.9	8109.07	1.51362	1.75931	0.597999	0.815012	1.76825	1.22295	0.822321	0.29036
	0.510423	0.711077	-0.31737	0.299735					542	4930402H24Rik	9586.03	17664.1	20071.8			1.8427	2.09386			0.881818	1.06617									Bzw1	22470.5	32008.5	36784.7	6587.82	5286.92	8109.07	1.42447	1.63703	0.510423	0.711077	0.80253	1.23092	-0.317374	0.299735
	0.760925	1.60143	0.694682	1.3122					543	4930404I05Rik	9328.34	19841.6	22541.6			2.12702	2.41647			1.08883	1.2729									Tlcd2	13726.2	23260.2	41651.3	3263.85	5282.63	8104.77	1.69458	3.03443	0.760925	1.60143	1.61853	2.48319	0.694682	1.3122
	0.570742	0.715642	0.422784	0.468718					544	4930404N11Rik	14765.6	23814.2	19440.4			1.61282	1.3166			0.689583	0.396822									Dgcr8	25459.7	37814.9	41810.2	5853.46	7846.63	8100.48	1.48529	1.64221	0.570742	0.715642	1.34051	1.38388	0.422784	0.468718
	0.970204	1.06751	0.732668	0.592811					545	4930405A21Rik	11849.4	15894.7	21450.6			1.3414	1.81027			0.423735	0.856206									Med22	18510.7	36264.5	38794.9	5368.17	8920.34	8096.18	1.95912	2.09582	0.970204	1.06751	1.66171	1.50818	0.732668	0.592811
	1.20092	1.30459	1.28049	1.11987					546	4930412C18Rik	4131.61	4732.77	7499.55			1.1455	1.81516			0.195981	0.8601									Rps27a	13893.7	31939.8	34319.2	3723.37	9044.89	8091.89	2.29886	2.47013	1.20092	1.30459	2.42922	2.17327	1.28049	1.11987
	0.526893	0.745039	0.980143	0.937178					547	4930412F15Rik	5888.19	12068.1	12310.3			2.04955	2.09067			1.03531	1.06397									Brwd1	29810.3	42951.4	49962.7	4221.53	8327.65	8083.3	1.44082	1.67602	0.526893	0.745039	1.97266	1.91478	0.980143	0.937178
	0.691542	0.728987	1.0362	1.36647					548	4930412M03Rik	15813.5	25897.1	36879.2			1.63766	2.33213			0.711633	1.22165									Stard7	25515.5	41207.7	42291.3	3135.01	6429.34	8083.3	1.61501	1.65748	0.691542	0.728987	2.05082	2.5784	1.0362	1.36647
	1.14695	1.17425	0.637868	1.07409					549	4930415F15Rik	6979.07	15916.2	24143.8			2.28056	3.45945			1.18939	1.79054									Nudt2	15336.8	33962.6	34611.3	3839.32	5974.09	8083.3	2.21445	2.25675	1.14695	1.17425	1.55603	2.1054	0.637868	1.07409
	0.77903	0.797998	0.64367	0.603662					550	4930420K17Rik	15186.5	21263.1	31072			1.40014	2.04604			0.485567	1.03283									Morc3	29037.2	49827.2	50486.7	5316.64	8306.18	8079	1.71598	1.73869	0.77903	0.797998	1.5623	1.51957	0.64367	0.603662
	0.875279	0.844009	0.552635	-0.04143					551	4930422G04Rik	4397.89	9121.96	7929.08			2.07417	1.80293			1.05253	0.850342									Rpl37	19970.9	36633.9	35848.4	8309.93	12188.7	8074.71	1.83436	1.79503	0.875279	0.844009	1.46676	0.971694	0.552635	-0.0414259
	1.4333	1.53238	-0.08561	0.549851					552	4930426I24Rik	7683.42	11406.8	13689			1.48459	1.78163			0.570067	0.833201									Spr	14636.7	39528.5	42338.5	5509.89	5192.44	8066.12	2.70064	2.89262	1.4333	1.53238	0.942385	1.46393	-0.0856109	0.549851
	0.979756	1.05187	0.848669	1.17221					553	4930426L09Rik	10311.9	16736.5	21948.9			1.62303	2.12851			0.698693	1.08984									Ssna1	16827.1	33185.2	34886.2	3577.35	6442.23	8061.82	1.97213	2.07322	0.979756	1.05187	1.80084	2.25357	0.848669	1.17221
	0.610231	0.422916	1.10429	0.339518					554	4930427A07Rik	16865.7	32317.7	34409.5			1.91617	2.0402			0.938228	1.02871									4930443B20Rik	32202.5	49157.2	43171.8	6364.51	13683.3	8053.23	1.5265	1.34063	0.610231	0.422916	2.14994	1.26533	1.10429	0.339518
	0.493474	0.772249	0.421528	0.473336					555	4930429B21Rik	9190.9	20442.8	20686			2.22425	2.25071			1.15332	1.17038									Cd164	25335.1	35667.6	43270.6	5797.63	7765.03	8048.94	1.40783	1.70793	0.493474	0.772249	1.33935	1.38832	0.421528	0.473336
	1.03627	1.25582	-0.05872	0.295596					556	4930429F24Rik	8250.34	15289.2	17679.4			1.85316	2.14286			0.889985	1.09954									Mif4gd	21066.1	43204.8	50306.3	6557.76	6296.2	8048.94	2.05092	2.38802	1.03627	1.25582	0.960114	1.22739	-0.0587217	0.295596
	0.717797	0.799722	0.585425	0.517725					557	4930430F08Rik	8280.4	14194	16652.8			1.71417	2.01111			0.777511	1.00799									Insig1	28491.8	46859.6	49597.6	5612.96	8422.14	8036.05	1.64467	1.74077	0.717797	0.799722	1.50048	1.4317	0.585425	0.517725
	0.734603	0.839445	0.958347	1.12325					558	4930430O22Rik	4509.56	6553.73	8659.28			1.4533	1.92021			0.53933	0.94126									Pptc7	17050.4	28370.8	30509.3	3689.01	7168.05	8036.05	1.66394	1.78936	0.734603	0.839445	1.94308	2.17838	0.958347	1.12325
	0.750496	1.07664	1.19473	1.11668					559	4930432B10Rik	21937.9	40155.5	44920			1.83042	2.0476			0.872173	1.03393									Nop10	16092.7	27073.8	33941.3	3701.89	8473.68	8027.46	1.68237	2.10911	0.750496	1.07664	2.28901	2.16848	1.19473	1.11668
	0.4053	0.895884	0.733461	0.29114					560	4930432K21Rik	16032.5	28602.8	15531.7			1.78404	0.968762			0.835152	-0.0457854									Gm11336	17462.7	23127	32493.8	6553.47	10896	8018.87	1.32436	1.86075	0.4053	0.895884	1.66262	1.22361	0.733461	0.29114
	0.548724	0.642989	0.620461	0.275158					561	4930441O14Rik	5226.79	7395.49	9977.93			1.41492	1.909			0.500721	0.932815									Mphosph9	35642.7	52137.8	55658.2	6626.47	10187.3	8018.87	1.46279	1.56156	0.548724	0.642989	1.53737	1.21013	0.620461	0.275158
	1.17781	1.24601	0.147635	0.720749					562	4930443B20Rik	32202.5	49157.2	43171.8			1.5265	1.34063			0.610231	0.422916									Wdr45l	17776.2	40215.7	42162.4	4865.71	5390	8018.87	2.26233	2.37184	1.17781	1.24601	1.10775	1.64804	0.147635	0.720749
	0.909013	0.882815	0.943458	0.791767					563	4930444A02Rik	15998.2	21172.9	21927.4			1.32346	1.37062			0.404312	0.454826									Vamp1	18171.4	34121.5	33507.4	4629.51	8903.16	8014.58	1.87776	1.84397	0.909013	0.882815	1.92313	1.73119	0.943458	0.791767
	0.419123	0.308508	-0.15635	0.165469					564	4930444M15Rik	4393.6	3259.68	4763.46			0.741916	1.08418			-0.430673	0.116606									Gm11408	4127.32	5518.7	5111.38	7146.11	6412.16	8014.58	1.33711	1.23843	0.419123	0.308508	0.897294	1.12153	-0.156348	0.165469
	0.666456	0.80661	0.044259	0.688487					565	4930445N08Rik	10256	11170.5	17155.3			1.08917	1.67271			0.123228	0.742186									Txndc11	22629.4	35916.7	39581	4973.08	5128.01	8014.58	1.58717	1.7491	0.666456	0.80661	1.03115	1.61159	0.0442594	0.688487
	0.517616	1.03397	0.484112	0.862318					566	4930448E22Rik	4427.95	11015.9	9170.41			2.48782	2.07103			1.31488	1.05035									Brca2	20915.8	29942.7	42828.2	4406.2	6163.06	8010.28	1.43159	2.04765	0.517616	1.03397	1.39872	1.81796	0.484112	0.862318
	0.997291	1.24856	0.137117	0.768962					567	4930452B06Rik	10320.4	20730.6	24083.6			2.00869	2.33358			1.00625	1.22255									Rpa1	15074.8	30093	35818.3	4698.23	5166.67	8005.99	1.99625	2.37604	0.997291	1.24856	1.09971	1.70404	0.137117	0.768962
	0.536747	0.71207	0.152232	0.82544					568	4930453N24Rik	12704.1	22169.3	27962.2			1.74506	2.20105			0.803273	1.13819									Fam53a	29290.6	42491.9	47982.5	4517.86	5020.64	8005.99	1.4507	1.63815	0.536747	0.71207	1.11129	1.77208	0.152232	0.82544
	0.47046	0.388728	0.614512	-0.18499					569	4930455B14Rik	4513.85	6712.63	8581.96			1.48712	1.90125			0.57252	0.926949									Pabpc1	34083.7	47224.6	44623.6	9091.54	13919.5	7997.4	1.38555	1.30924	0.47046	0.388728	1.53104	0.879653	0.614512	-0.184994
	0.766149	0.970499	0.650311	0.814324					570	4930455C21Rik	21796.2	39408.3	34581.3			1.80804	1.58657			0.854423	0.665916									Mettl16	19103.3	32489.5	37433.3	4547.92	7137.99	7997.4	1.70072	1.95952	0.766149	0.970499	1.56951	1.75847	0.650311	0.814324
	0.968458	0.98564	0.205759	0.755594					571	4930455D15Rik	5450.12	13335.1	14981.9			2.44675	2.74892			1.29087	1.45886									Taf8	12227.3	23925.8	24212.5	4736.88	5463.01	7997.4	1.95675	1.98019	0.968458	0.98564	1.15329	1.68833	0.205759	0.755594
	0.503145	0.563022	0.386908	0.193373					572	4930455F23Rik	5776.53	11076.1	13427			1.91742	2.32441			0.93917	1.21687									Zfp42	24678	34976.1	36458.3	6982.92	9130.78	7984.51	1.4173	1.47736	0.503145	0.563022	1.30759	1.14343	0.386908	0.193373
	0.664533	0.565672	0.372705	-0.06287					573	4930461C15Rik	8619.69	15130.3	18856.3			1.75531	2.18758			0.811729	1.12934									Eif4a2	20744	32880.3	30702.6	8335.7	10792.9	7980.22	1.58505	1.48008	0.664533	0.565672	1.29478	0.957355	0.372705	-0.0628748
	0.958915	1.02242	0.448438	-0.36361					574	4930461G14Rik	13271	21795.7	27459.7			1.64235	2.06915			0.715765	1.04904									Oaz1	23883.5	46425.8	48515.1	10251.1	13988.2	7967.33	1.94385	2.03133	0.958915	1.02242	1.36456	0.777219	0.448438	-0.363606
	0.559372	1.11038	0.82469	0.747545					575	4930465K10Rik	11501.5	23212.9	20806.3			2.01825	1.80901			1.0131	0.855199									Ddx5	22178.4	32682.7	47883.7	4745.47	8404.96	7967.33	1.47363	2.15902	0.559372	1.11038	1.77115	1.67893	0.82469	0.747545
	0.272061	0.759755	0.426606	0.08021					576	4930467E23Rik	12669.7	13992.2	8633.5			1.10438	0.681429			0.143236	-0.553365									Klf9	23630.1	28534	40010.5	7528.33	10118.6	7958.74	1.20753	1.6932	0.272061	0.759755	1.34407	1.05717	0.426606	0.0802102
	0.559856	0.930296	0.523745	0.394342					577	4930467K11Rik	12012.6	17183.1	24629.1			1.43043	2.05027			0.516444	1.03582									Klf3	23350.9	34422.1	44499.1	6055.3	8705.6	7958.74	1.47412	1.90567	0.559856	0.930296	1.43768	1.31434	0.523745	0.394342
	0.726106	0.902449	0.539852	-0.02989					578	4930471M09Rik	9775	23904.3	24603.3			2.44546	2.51697			1.2901	1.33169									Rtn4	27808.9	46000.6	51981.4	8120.97	11806.5	7954.45	1.65417	1.86924	0.726106	0.902449	1.45382	0.979495	0.539852	-0.0298899
	0.496963	1.19447	-0.00235	0.061439					579	4930471M23Rik	11535.9	20777.8	23112.9			1.80115	2.00357			0.848917	1.00257									Ucp2	21104.7	29783.8	48300.4	7622.81	7610.42	7954.45	1.41124	2.28861	0.496963	1.19447	0.998375	1.04351	-0.00234684	0.0614393
	0.766314	0.991886	0.929458	0.337578					580	4930473A02Rik	16062.6	39468.4	41281.9			2.45716	2.57006			1.29699	1.3618									Atp1b1	28178.3	47929	56040.5	6291.5	11982.5	7950.15	1.70092	1.98878	0.766314	0.991886	1.90456	1.26363	0.929458	0.337578
	0.648695	0.710513	0.479951	0.02692					581	4930473A06Rik	7528.81	20168	19732.5			2.67877	2.62093			1.42157	1.39008									Adpgk	30506.1	47825.9	49919.7	7803.18	10883.1	7950.15	1.56775	1.63639	0.648695	0.710513	1.3947	1.01883	0.479951	0.0269199
	1.06965	1.02381	0.40429	0.663203					582	4930477E14Rik	3345.66	5321.15	3444.81			1.59046	1.02964			0.669447	0.0421336									Qrich1	19614.4	41169.1	39881.6	5020.32	6644.08	7950.15	2.09892	2.03328	1.06965	1.02381	1.32344	1.58359	0.40429	0.663203
	0.699389	1.39608	0.565894	0.946593					583	4930478K11Rik	3882.51	5892.34	3960.24			1.51766	1.02002			0.601851	0.0285982									Fnip1	15014.7	24381.1	39516.5	4122.76	6102.94	7945.86	1.62382	2.63186	0.699389	1.39608	1.4803	1.92732	0.565894	0.946593
	0.761976	0.786656	0.466003	0.386357					584	4930480K23Rik	10423.5	23427.6	15656.3			2.24758	1.50202			1.16837	0.5869									Ost4	18639.5	31609.1	32154.4	6072.48	8387.78	7937.27	1.69581	1.72507	0.761976	0.786656	1.38128	1.30709	0.466003	0.386357
	0.588124	0.95845	1.0258	0.468518					585	4930481A15Rik	5432.94	3538.84	9703.03			0.651367	1.78596			-0.618457	0.836702									Trp53inp1	25171.9	37840.7	48914.6	5733.21	11673.3	7932.97	1.50329	1.94322	0.588124	0.95845	2.03609	1.38369	1.0258	0.468518
	0.940773	1.0689	1.44656	0.861678					586	4930481B07Rik	17419.8	34684.1	37205.7			1.99108	2.13583			0.993548	1.0948									Arl4d	21207.8	40709.6	44490.5	4363.25	11892.4	7928.68	1.91956	2.09784	0.940773	1.0689	2.72557	1.81715	1.44656	0.861678
	0.872325	1.14889	0.276391	-0.03762					587	4930483J18Rik	6429.34	14395.9	16828.9			2.23909	2.61751			1.16291	1.3882									Fbxo5	23789	43548.4	52750.3	8138.15	9856.61	7928.68	1.83061	2.21743	0.872325	1.14889	1.21116	0.974261	0.276391	-0.0376202
	0.534166	0.856372	0.047133	0.234732					588	4930500F10Rik	13910.9	23827	18761.8			1.71283	1.34871			0.776385	0.43158									Tubb2b	19627.3	28422.4	35534.8	6738.13	6961.9	7928.68	1.4481	1.81048	0.534166	0.856372	1.03321	1.17669	0.0471328	0.234732
	0.499688	0.424883	0.206896	-0.24053					589	4930500J02Rik	12235.9	18136.6	18302.2			1.48224	1.49577			0.567777	0.580891									Tomm20	26924.2	38068.3	36144.8	9362.1	10805.8	7924.38	1.41391	1.34246	0.499688	0.424883	1.1542	0.846432	0.206896	-0.240534
	0.681647	0.760346	0.547983	0.288291					590	4930500M09Rik	4032.83	3603.26	6017.68			0.893482	1.49217			-0.16249	0.577415									Nr2c2ap	22071	35401.3	37386.1	6489.05	9487.25	7924.38	1.60397	1.6939	0.681647	0.760346	1.46204	1.22119	0.547983	0.288291
	0.723675	0.780857	0.843253	0.587485					591	4930502E09Rik	9049.17	15529.7	24685			1.71614	2.72787			0.77917	1.44777									9230116N13Rik	30334.3	50093.5	52118.9	5273.69	9461.48	7924.38	1.65138	1.71815	0.723675	0.780857	1.79409	1.50263	0.843253	0.587485
	0.525644	0.589377	0.782986	0.413127					592	4930503L19Rik	8752.83	13515.5	17490.4			1.54412	1.99825			0.626788	0.998739									Atp5g2	25176.2	36243.1	37880	5947.94	10234.5	7920.09	1.43958	1.5046	0.525644	0.589377	1.72069	1.33157	0.782986	0.413127
	0.847998	1.12858	0.71186	0.704139					593	4930505N22Rik	9775	20039.1	21454.9			2.05004	2.19487			1.03565	1.13414									1810032O08Rik	18729.7	33713.5	40951.2	4861.42	7962.59	7920.09	1.8	2.18643	0.847998	1.12858	1.63791	1.62917	0.71186	0.704139
	0.608506	0.863207	0.388399	0.33923					594	4930506C21Rik	8598.22	18149.4	16004.2			2.11084	1.86134			1.07782	0.896341									Cep55	21199.2	32322	38563	6257.14	8190.22	7915.79	1.52468	1.81908	0.608506	0.863207	1.30894	1.26508	0.388399	0.33923
	1.27842	1.73276	0.617988	0.996267					595	4930509E16Rik	20469.1	39640.2	44576.4			1.93659	2.17774			0.953516	1.12283									Ggnbp2	17217.9	41766.1	57226	3968.15	6090.05	7915.79	2.42573	3.32363	1.27842	1.73276	1.53473	1.99483	0.617988	0.996267
	0.466106	0.24332	0.851826	-0.00139					596	4930511F01Rik	7348.43	10865.6	14840.2			1.47863	2.0195			0.564263	1.014									Slc7a5	37102.9	51253.1	43919.2	7914.84	14284.6	7907.2	1.38138	1.18371	0.466106	0.24332	1.80478	0.999035	0.851826	-0.00139327
	0.949536	0.995015	0.981902	0.527904					597	4930513N10Rik	6583.95	11647.2	10063.8			1.76904	1.52854			0.822964	0.612154									Hells	22942.9	44308.5	45727.5	5484.13	10831.5	7907.2	1.93125	1.9931	0.949536	0.995015	1.97507	1.44183	0.981902	0.527904
	0.889517	1.04912	0.314919	0.58985					598	4930515G01Rik	7966.88	14816.8	16184.6			1.85979	2.03149			0.895142	1.02253									Lsm2	18910.1	35031.9	39130	5247.93	6528.12	7898.61	1.85256	2.06927	0.889517	1.04912	1.24394	1.50509	0.314919	0.58985
	1.06715	0.711978	0.244638	0.144606					599	4930517O19Rik	4904.68	3620.44	7143.04			0.73816	1.45637			-0.437994	0.542379									Pgls	23020.2	48233.9	37708.2	7137.52	8456.5	7890.02	2.09528	1.63805	1.06715	0.711978	1.1848	1.10543	0.244638	0.144606
	0.892788	1.18031	0.379283	0.314857					600	4930519A11Rik	5913.96	8091.23	6876.74			1.36816	1.1628			0.452235	0.2176									Ddrgk1	21925	40709.6	49687.8	6343.03	8250.35	7890.02	1.85676	2.26626	0.892788	1.18031	1.3007	1.24389	0.379283	0.314857
	0.612266	0.708246	0.84524	1.11972					601	4930519F16Rik	4071.48	7455.62	6644.79			1.83118	1.63203			0.872775	0.70667									2810407C02Rik	29260.6	44729.4	47806.4	3628.89	6519.53	7885.73	1.52866	1.63382	0.612266	0.708246	1.79656	2.17304	0.84524	1.11972
	0.455134	0.768804	0.784721	0.638391					602	4930520O04Rik	5544.61	12553.4	10502			2.26408	1.89408			1.17892	0.921499									Rce1	26073.8	35744.9	44426	5063.26	8722.78	7881.43	1.37091	1.70386	0.455134	0.768804	1.72276	1.55659	0.784721	0.638391
	0.461757	0.997926	0.071985	-0.06365					603	4930522L14Rik	10213.1	19205.9	19049.5			1.88053	1.86521			0.911136	0.89934									Hexim1	25034.5	34477.9	49997	8236.93	8658.35	7881.43	1.37722	1.99713	0.461757	0.997926	1.05116	0.956841	0.0719854	-0.0636493
	0.994527	1.09584	0.668973	0.735831					604	4930524B15Rik	3259.76	5278.2	12847.2			1.6192	3.94114			0.69528	1.97861									Zfp346	19979.5	39807.7	42703.6	4732.58	7524.52	7881.43	1.99243	2.13737	0.994527	1.09584	1.58994	1.66536	0.668973	0.735831
	0.742846	1.18624	0.200142	0.406067					605	4930524J08Rik	12145.7	22521.5	26334.3			1.85427	2.1682			0.89085	1.11649									A230051G13Rik	19653.1	32888.9	44722.4	5947.94	6833.06	7881.43	1.67347	2.27559	0.742846	1.18624	1.14881	1.32507	0.200142	0.406067
	0.833264	0.634924	0.718523	-0.10595					606	4930524L23Rik	8563.86	6635.33	9857.66			0.774806	1.15108			-0.368093	0.202984									Rps16	25799	45966.3	40062	8477.42	13949.6	7877.14	1.78171	1.55286	0.833264	0.634924	1.6455	0.929191	0.718523	-0.105953
	0.90053	0.949092	0.137049	0.353112					607	4930524O07Rik	11819.3	23505	28924.4			1.98869	2.44721			0.991816	1.29114									Rfesd	17475.6	32622.6	33739.4	6166.96	6781.52	7877.14	1.86675	1.93066	0.90053	0.949092	1.09965	1.27731	0.137049	0.353112
	0.814045	1.00842	0.538616	0.674939					608	4930525F21Rik	10616.8	13451	15630.5			1.26696	1.47225			0.34137	0.558019									Adnp2	21667.3	38094.1	43588.5	4925.84	7155.17	7864.25	1.75813	2.01171	0.814045	1.00842	1.45258	1.59653	0.538616	0.674939
	0.654777	0.816801	1.04306	0.313452					609	4930525G20Rik	4466.61	5789.27	5308.96			1.29612	1.18859			0.374201	0.249249									Gm16749	22221.4	34984.7	39142.8	6321.56	13026.2	7855.66	1.57437	1.7615	0.654777	0.816801	2.0606	1.24268	1.04306	0.313452
	0.71658	0.947299	0.529453	0.081339					610	4930527J03Rik	6979.07	7416.96	9754.57			1.06274	1.39769			0.0877932	0.483043									Tiparp	22444.7	36883	43279.2	7420.96	10711.3	7851.37	1.64328	1.92826	0.71658	0.947299	1.44338	1.058	0.529453	0.0813386
	0.52914	0.620427	-0.23011	0.333393					611	4930528F23Rik	4913.27	14614.9	21446.3			2.97458	4.36498			1.57268	2.12597									Zfp553	22418.9	32352	34465.3	6231.38	5312.69	7851.37	1.44307	1.53733	0.52914	0.620427	0.85257	1.25997	-0.230109	0.333393
	0.37104	0.519986	1.25798	0.355655					612	4930532G15Rik	11166.5	21099.9	21248.7			1.88957	1.9029			0.918057	0.928197									4930558J22Rik	27761.7	35903.8	39808.6	6132.6	14666.8	7847.07	1.29329	1.43394	0.37104	0.519986	2.39161	1.27957	1.25798	0.355655
	0.89176	0.824398	0.609448	0.437761					613	4930534B04Rik	5372.81	9920.78	12164.2			1.84648	2.26403			0.884777	1.1789									Cops7a	19227.9	35676.2	34048.7	5793.33	8838.74	7847.07	1.85544	1.7708	0.89176	0.824398	1.52568	1.3545	0.609448	0.437761
	0.693563	0.810432	0.88473	0.776092					614	4930535L15Rik	13051.9	22010.4	25741.6			1.68637	1.97224			0.75392	0.979837									2810021B07Rik	18158.5	29367.2	31845.2	4582.27	8460.79	7847.07	1.61727	1.75374	0.693563	0.810432	1.84642	1.71249	0.88473	0.776092
	0.720596	1.13273	-0.21514	0.680618					615	4930539J05Rik	5866.72	8778.39	9857.66			1.4963	1.68027			0.581402	0.748691									Aff4	19455.5	32060	42660.7	4895.77	4217.51	7847.07	1.64786	2.19273	0.720596	1.13273	0.86146	1.60283	-0.215144	0.680618
	0.883153	0.818458	0.177895	0.281977					616	4930540M05Rik	12532.3	19141.5	23886			1.52738	1.90596			0.611058	0.930519									Mrpl40	32138.1	59275.6	56676.2	6450.4	7296.9	7842.78	1.8444	1.76352	0.883153	0.818458	1.13123	1.21586	0.177895	0.281977
	0.376032	0.696379	0.994005	1.13594					617	4930542C12Rik	6927.54	13107.5	19822.7			1.89208	2.86143			0.919972	1.51674									Zfp428	22642.3	29384.4	36690.2	3568.76	7107.92	7842.78	1.29777	1.62043	0.376032	0.696379	1.99171	2.19762	0.994005	1.13594
	1.00232	0.86787	0.360911	0.733985					618	4930547E08Rik	8598.22	16255.5	11635.9			1.89056	1.35329			0.918816	0.436473									Anp32e	14460.6	28967.8	26390.2	4715.4	6055.69	7842.78	2.00322	1.82497	1.00232	0.86787	1.28424	1.66323	0.360911	0.733985
	1.16049	0.923534	0.381677	0.374658					619	4930547M16Rik	5845.24	7709	12439.1			1.31885	2.12808			0.399281	1.08955									Mdm2	17935.1	40091.1	34018.6	6042.42	7872.4	7834.19	2.23534	1.89676	1.16049	0.923534	1.30286	1.29653	0.381677	0.374658
	0.402511	1.20826	0.669063	0.964994					620	4930547N16Rik	14031.2	23294.5	27360.9			1.6602	1.95001			0.731356	0.963482									Suz12	13825	18274	31944	4011.1	6377.81	7829.89	1.32181	2.31059	0.402511	1.20826	1.59004	1.95206	0.669063	0.964994
	0.213727	0.658615	0.389571	0.167034					621	4930548H24Rik	4462.31	5222.37	7761.56			1.17033	1.73936			0.226914	0.798556									Nfkbia	32404.4	37578.7	51152.4	6970.04	9130.78	7825.6	1.15968	1.57857	0.213727	0.658615	1.31	1.12275	0.389571	0.167034
	1.13365	1.1001	0.587674	0.50393					622	4930550C14Rik	7524.51	11076.1	11172			1.472	1.48475			0.557775	0.570219									Faf1	18291.6	40134.1	39211.6	5518.48	8293.29	7825.6	2.19412	2.14369	1.13365	1.1001	1.50282	1.41807	0.587674	0.50393
	0.726251	0.97475	0.804405	0.841377					623	4930550G17Rik	4921.86	12497.6	10098.2			2.5392	2.0517			1.34438	1.03682									Gart	19683.1	32562.5	38683.3	4367.55	7627.6	7825.6	1.65433	1.9653	0.726251	0.97475	1.74643	1.79176	0.804405	0.841377
	0.953516	1.12283	0.984513	0.968051					624	4930555B11Rik	5763.64	7812.08	7009.89			1.35541	1.21623			0.438726	0.282412									4930509E16Rik	20469.1	39640.2	44576.4	3998.22	7911.06	7821.3	1.93659	2.17774	0.953516	1.12283	1.97865	1.9562	0.984513	0.968051
	0.739692	1.34212	0.046277	1.13372					625	4930555I21Rik	4230.39	7859.32	11880.7			1.85782	2.80842			0.893614	1.48976									Jak1	16586.6	27696.6	42050.8	3564.47	3680.66	7821.3	1.66982	2.53523	0.739692	1.34212	1.0326	2.19424	0.0462769	1.13372
	0.940363	1.00671	0.28062	0.357207					626	4930555J06Rik	6132.99	7923.74	11429.7			1.29199	1.86365			0.369591	0.898129									Nptn	21701.7	41645.8	43605.6	6102.54	7412.86	7817.01	1.91901	2.00932	0.940363	1.00671	1.21472	1.28094	0.28062	0.357207
	-0.39778	-0.770019	0.4472	0.153237					627	4930558J18Rik	17608.7	30067.3	32957.7			1.70752	1.87166			0.771902	0.904322									Gm16094	9500.13	7210.82	5570.97	7021.57	9573.15	7808.42	0.759023	0.58641	-0.397784	-0.770019	1.36339	1.11206	0.4472	0.153237
	0.704795	1.10132	0.65803	0.954072					628	4930558J22Rik	27761.7	35903.8	39808.6			1.29329	1.43394			0.37104	0.519986									Golph3	17235.1	28091.7	36978	4028.28	6356.33	7804.12	1.62991	2.14551	0.704795	1.10132	1.57793	1.93733	0.65803	0.954072
	1.03048	1.05005	0.368127	0.121955					629	4930563E22Rik	7747.85	16246.9	20149.1			2.09695	2.60061			1.0683	1.37885									Gnl3	19588.7	40013.8	40560.3	7167.59	9251.04	7799.83	2.0427	2.0706	1.03048	1.05005	1.29068	1.08821	0.368127	0.121955
	1.07069	1.25128	-0.03276	0.495806					630	4930566F21Rik	4685.64	8134.18	8161.02			1.73598	1.74171			0.795751	0.800503									Dus1l	14276	29985.7	33984.2	5531.37	5407.18	7799.83	2.10043	2.38052	1.07068	1.25128	0.977548	1.41011	-0.0327605	0.495806
	0.526585	0.826833	0.186278	0.662277					631	4930570N19Rik	21147.7	41405.3	37244.3			1.95791	1.76116			0.969317	0.816522									Rnps1	19975.2	28774.6	35431.7	4925.84	5604.74	7795.53	1.44052	1.77379	0.526585	0.826833	1.13782	1.58258	0.186278	0.662277
	0.71677	0.896581	0.595777	-0.15095					632	4930572J05Rik	20013.8	24694.6	32532.4			1.23388	1.6255			0.303196	0.70088									Hnrnpa1	19807.7	32553.9	36874.9	8636.32	13052	7778.35	1.6435	1.86165	0.71677	0.896581	1.51129	0.900656	0.595777	-0.150953
	0.801805	1.3589	0.870428	0.624301					633	4930577N17Rik	9770.7	19717	23392.1			2.01797	2.3941			1.01291	1.25949									Fasn	23960.8	41770.3	61456.8	5046.08	9225.27	7778.35	1.74328	2.56489	0.801805	1.3589	1.82821	1.54146	0.870428	0.624301
	0.84317	0.84336	0.487297	0.266238					634	4930578M01Rik	5793.7	6626.74	8526.12			1.14378	1.47162			0.193814	0.557404									AY074887	23312.2	41821.9	41827.4	6467.58	9066.36	7778.35	1.79399	1.79422	0.84317	0.84336	1.40182	1.20267	0.487297	0.266238
	0.515247	0.257691	1.20207	0.721286					635	4930578N16Rik	4835.96	11028.8	12924.5			2.28058	2.67258			1.1894	1.41823									Hmox1	31425.2	44914.1	37570.8	4715.4	10848.7	7774.05	1.42924	1.19556	0.515247	0.257691	2.3007	1.64865	1.20207	0.721286
	0.734756	1.08109	0.656288	0.473219					636	4930579G22Rik	13159.3	23994.5	38124.9			1.82339	2.89718			0.866622	1.53465									Uck2	21100.4	35113.6	44640.8	5600.08	8825.85	7774.05	1.66412	2.11564	0.734756	1.08109	1.57602	1.3882	0.656288	0.473219
	0.533742	0.657356	0.814801	0.156795					637	4930579G24Rik	15616	32072.9	35556.3			2.05385	2.27692			1.03833	1.18708									Btg1	27435.3	39717.5	43270.6	6965.74	12253.1	7765.46	1.44768	1.57719	0.533742	0.657356	1.75906	1.11481	0.814801	0.156795
	1.01898	1.39962	0.70347	0.72284					638	4930579K19Rik	6841.64	15418	19161.2			2.25355	2.80068			1.1722	1.48578									Tmem93	13597.4	27554.9	35874.1	4702.52	7657.66	7761.17	2.02648	2.63831	1.01898	1.39962	1.62842	1.65043	0.70347	0.72284
	0.634512	0.700825	0.689563	0.25396					639	4930580A09Rik	3693.54	4702.71	6481.57			1.27323	1.75484			0.348488	0.811339									Ccnl1	24892.7	38643.8	40461.5	6497.64	10479.4	7748.28	1.55241	1.62543	0.634512	0.700825	1.61279	1.19248	0.689563	0.25396
	0.478338	0.728337	0.697767	0.240818					640	4930581F22Rik	14752.7	35491.5	31746.4			2.40576	2.1519			1.26649	1.10561									Klf10	31700	44162.5	52518.3	6553.47	10629.7	7743.99	1.39314	1.65673	0.478338	0.728337	1.62199	1.18166	0.697767	0.240818
	0.9595	0.855076	1.16375	1.18155					641	4930583H14Rik	10372	23878.6	14711.3			2.30222	1.41837			1.20303	0.504235									Dbi	18944.4	36840	34267.7	3414.16	7649.07	7743.99	1.94464	1.80885	0.9595	0.855076	2.2404	2.2682	1.16375	1.18155
	0.940897	1.19004	0.710844	0.950623					642	4930583K01Rik	9152.25	15435.2	17279.9			1.68649	1.88805			0.754025	0.916897									Myo9a	19966.6	38330.3	45555.7	4006.81	6558.19	7743.99	1.91972	2.2816	0.940897	1.19004	1.63676	1.93271	0.710844	0.950623
	0.746162	1.01011	1.08354	0.768434					643	4930589L23Rik	9405.64	12523.4	18907.8			1.33147	2.01026			0.413025	1.00738									Erc1	28234.1	47357.8	56865.2	4543.62	9628.98	7739.69	1.67732	2.01406	0.746162	1.01011	2.11923	1.70342	1.08354	0.768434
	0.705266	0.311382	0.658793	0.301028					644	4930593A02Rik	4518.14	5557.35	7675.66			1.23001	1.69885			0.298668	0.764562									Gmeb2	29754.5	48513	36922.2	6278.62	9912.44	7735.4	1.63045	1.2409	0.705266	0.311382	1.57876	1.23202	0.658793	0.301028
	0.763065	0.882122	0.4235	0.259365					645	4930594M22Rik	14645.3	14477.5	22760.7			0.988539	1.55413			-0.0166302	0.636103									Cdkn2aip	24574.9	41705.9	45293.7	6458.99	8662.65	7731.1	1.69709	1.84308	0.763065	0.882122	1.34118	1.19695	0.4235	0.259365
	0.762766	1.07386	0.794031	0.84385					646	4930597O21Rik	6077.16	19742.8	19315.9			3.24869	3.17844			1.69986	1.66832									Ywhah	22818.3	38716.8	48034.1	4307.42	7468.69	7731.1	1.69674	2.10506	0.762766	1.07386	1.73391	1.79483	0.794031	0.84385
	0.615487	0.635773	0.157702	0.298254					647	4931406G06Rik	12824.3	22036.2	24882.5			1.71831	1.94026			0.780991	0.956251									2410019O14Rik	17587.3	26945	27326.5	6287.21	7013.44	7731.1	1.53208	1.55377	0.615487	0.635773	1.11551	1.22966	0.157702	0.298254
	0.618892	0.328471	0.936397	0.181977					648	4931406P16Rik	16509.3	29964.2	42828.2			1.81499	2.59419			0.859963	1.37528									Cox4nb	33293.4	51128.5	41805.9	6811.14	13034.8	7726.81	1.5357	1.25568	0.618892	0.328471	1.91374	1.13444	0.936397	0.181977
	0.834304	0.555917	1.02558	0.915309					649	4931408C20Rik	4105.84	4973.27	3539.31			1.21127	0.862018			0.276517	-0.214209									Rsl1d1	21220.7	37836.4	31196.6	4096.99	8340.54	7726.81	1.783	1.4701	0.834304	0.555917	2.03577	1.88597	1.02558	0.915309
	1.20065	1.25899	0.812627	0.857503					650	4931414P19Rik	6283.31	9418.3	9032.97			1.49894	1.43761			0.583942	0.523676									Acat2	20172.7	46365.7	48278.9	4264.48	7490.16	7726.81	2.29843	2.39327	1.20065	1.25899	1.75641	1.8119	0.812627	0.857503
	0.607177	0.682391	0.134763	0.192935					651	4931415C17Rik	9822.24	12355.9	14646.9			1.25795	1.4912			0.331074	0.57647									Caprin1	22659.4	34516.6	36363.8	6759.6	7421.45	7726.81	1.52328	1.6048	0.607177	0.682391	1.09791	1.14309	0.134763	0.192935
	0.791031	0.578961	1.09459	0.698608					652	4931417G12Rik	4883.2	5449.99	6271.1			1.11607	1.28422			0.158427	0.360892									Ccni	22187	38390.4	33142.3	4758.35	10161.5	7722.51	1.73031	1.49377	0.791031	0.578961	2.13552	1.62294	1.09459	0.698608
	0.578359	0.423115	0.825405	0.544763					653	4931422A03Rik	3581.88	3830.88	5824.39			1.06952	1.62607			0.0969588	0.70139									Ndufa7	23007.3	34353.4	30848.7	5290.87	9375.59	7718.22	1.49315	1.34082	0.578359	0.423115	1.77203	1.45878	0.825405	0.544763
	0.943381	1.12399	0.422236	0.564807					654	4931428F04Rik	18751.2	32777.2	28387.5			1.74801	1.51391			0.805714	0.598275									Atp5g1	18927.2	36397.7	41251.8	5217.87	6991.96	7718.22	1.92303	2.17949	0.943381	1.12399	1.34	1.47919	0.422236	0.564807
	0.432864	0.720264	0.556443	0.421651					655	4931440J10Rik	9689.1	12416	16176			1.28144	1.66951			0.357767	0.739421									Wibg	26546.2	35835.1	43734.5	5758.98	8469.38	7713.92	1.34991	1.64748	0.432864	0.720264	1.47064	1.33946	0.556443	0.421651
	0.416312	0.948375	0.112322	0.288163					656	4931440P22Rik	4380.71	5334.03	6777.95			1.21762	1.54723			0.284061	0.629684									Gfpt2	26009.4	34709.8	50190.3	6317.27	6828.76	7713.92	1.33451	1.9297	0.416312	0.948375	1.08097	1.22108	0.112322	0.288163
	0.828394	0.587249	0.612226	-0.03633					657	4932415G12Rik	14203	22671.8	30410.5			1.59627	2.14114			0.674706	1.09838									Psmd7	26142.5	46421.5	39276	7906.25	12085.6	7709.63	1.77571	1.50238	0.828394	0.587249	1.52862	0.975131	0.612226	-0.036332
	0.634316	0.992421	0.800558	0.230765					658	4932425I24Rik	3014.96	4191.64	6477.28			1.39028	2.14838			0.475376	1.10325									D230017M19Rik	19279.4	29925.5	38356.8	6566.35	11437.1	7705.33	1.5522	1.98952	0.634316	0.992421	1.74177	1.17346	0.800558	0.230765
	0.510281	0.649782	0.989403	0.920396					659	4932430I15Rik	4041.42	10260.1	6541.71			2.53873	1.61867			1.3441	0.694806									Gabpb2	17488.5	24909.3	27438.2	4071.22	8082.85	7705.33	1.42433	1.56893	0.510281	0.649782	1.98536	1.89263	0.989403	0.920396
	1.0478	1.10318	0.644734	1.02124					660	4932438A13Rik	11669	21641	29787.7			1.85457	2.55272			0.891088	1.35204									Polr2d	11720.5	24230.8	25178.9	3796.37	5935.44	7705.33	2.06737	2.14827	1.0478	1.10318	1.56345	2.02966	0.644734	1.02124
	1.06391	1.36058	0.212411	0.777093					661	4933403F05Rik	15783.4	32377.8	37291.6			2.05138	2.3627			1.03659	1.24044									Epn2	14641	30608.4	37596.6	4496.38	5209.61	7705.33	2.09059	2.56789	1.06391	1.36058	1.15862	1.71367	0.212411	0.777093
	0.805342	0.73227	0.29277	0.351173					662	4933403G14Rik	13644.6	30505.3	17090.9			2.2357	1.25257			1.16073	0.324895									Dak	19704.6	34435	32734.3	6033.83	7391.38	7696.74	1.74756	1.66125	0.805342	0.73227	1.22499	1.2756	0.29277	0.351173
	0.430922	1.11791	0.903533	1.05097					663	4933403O03Rik	11630.4	8043.99	7649.89			0.691637	0.657752			-0.531913	-0.604385									Limk2	17321	23350.3	37592.3	3714.78	6949.02	7696.74	1.34809	2.17033	0.430922	1.11791	1.87064	2.07192	0.903533	1.05097
	0.706582	0.905212	0.618503	0.277293					664	4933404O12Rik	4616.93	9916.48	10738.2			2.14785	2.32583			1.10289	1.21775									Zfp706	25253.5	41212	47295.3	6347.33	9744.94	7692.45	1.63193	1.87282	0.706582	0.905212	1.53528	1.21192	0.618503	0.277293
	0.482487	0.614796	0.589692	0.02132					665	4933405D12Rik	10591	15353.6	18534.1			1.44968	1.74999			0.535736	0.807343									Rpl6	27757.4	38781.2	42506.1	7562.68	11381.3	7675.27	1.39715	1.53134	0.482487	0.614796	1.50493	1.01489	0.589692	0.0213199
	0.853613	0.820889	1.29598	0.859367					666	4933405L10Rik	5256.85	7618.82	4114.87			1.44931	0.782763			0.535369	-0.353352									Mcm5	18965.9	34271.8	33503.2	4225.83	10376.3	7666.68	1.80702	1.76649	0.853613	0.820889	2.45544	1.81424	1.29598	0.859367
	1.02796	1.2635	0.199084	0.022164					667	4933406I18Rik	5763.64	11681.6	8659.28			2.02678	1.5024			1.01919	0.587267									Cltc	21371	43578.4	51307.1	7549.8	8666.94	7666.68	2.03914	2.40078	1.02796	1.2635	1.14797	1.01548	0.199084	0.0221635
	0.75288	1.0231	0.990453	0.98569					668	4933406P04Rik	25240.6	48306.9	43485.4			1.91386	1.72283			0.936482	0.784783									Polg2	26657.9	44922.7	54176.3	3869.38	7687.72	7662.38	1.68515	2.03228	0.75288	1.0231	1.98681	1.98026	0.990453	0.98569
	0.505983	0.412525	0.178598	-0.01911					669	4933407C03Rik	3242.58	4904.56	3960.24			1.51255	1.22132			0.596982	0.288446									Ier5l	30218.3	42912.7	40221	7760.23	8782.9	7658.09	1.42009	1.33101	0.505983	0.412525	1.13178	0.986838	0.178598	-0.0191148
	0.922231	1.01741	0.349736	0.500919					670	4933407H18Rik	12785.7	23453.4	29860.8			1.83435	2.33549			0.875271	1.22372									Tulp3	21779	41272.2	44086.7	5402.53	6884.59	7645.2	1.89504	2.02428	0.922231	1.01741	1.27433	1.41511	0.349736	0.500919
	0.865429	1.03782	0.754412	0.6626					671	4933407K13Rik	14684	29655	26171.1			2.01955	1.78229			1.01403	0.833734									Rps19	15749.1	28693	32334.8	4827.06	8142.98	7640.91	1.82188	2.05313	0.865429	1.03782	1.68694	1.58293	0.754412	0.6626
	-0.28088	0.326609	0.12329	0.651094					672	4933408J17Rik	10994.7	20979.7	21308.9			1.90816	1.9381			0.93218	0.954643									Sall1	19958	16427.3	25028.6	4865.71	5299.81	7640.91	0.823091	1.25406	-0.280875	0.326609	1.08922	1.57036	0.12329	0.651094
	0.786323	0.904923	0.797695	0.280689					673	4933411G11Rik	5291.21	7575.87	4995.41			1.43178	0.944096			0.517814	-0.0829946									Kdm5a	28238.4	48702	52874.8	6282.91	10921.7	7632.32	1.72467	1.87244	0.786323	0.904923	1.73832	1.21477	0.797695	0.280689
	0.907091	0.876707	0.479473	0.416023					674	4933412A08Rik	9865.19	15525.4	18297.9			1.57375	1.85479			0.65421	0.891258									Med26	21079	39528.5	38704.7	5720.33	7975.48	7632.32	1.87526	1.83618	0.907091	0.876707	1.39423	1.33424	0.479473	0.416023
	0.915081	1.02246	1.17308	0.838939					675	4933413G19Rik	7318.36	12270	8569.08			1.6766	1.1709			0.745542	0.22762									Pnn	19429.7	36638.2	39469.3	4264.48	9616.1	7628.02	1.88567	2.03139	0.915081	1.02246	2.25493	1.78873	1.17308	0.838939
	0.989148	1.27063	0.65972	0.612626					676	4933416M07Rik	3487.39	4208.82	7469.48			1.20687	2.14185			0.271268	1.09886									4732471D19Rik	18974.5	37664.6	45779.1	4985.96	7876.7	7623.73	1.98501	2.41266	0.989148	1.27063	1.57978	1.52904	0.65972	0.612626
	0.894748	0.798061	0.219759	0.552173					677	4933417D19Rik	3517.45	5346.91	3809.91			1.52011	1.08315			0.604175	0.115227									Atp6v0c	16822.8	31278.4	29250.8	5196.39	6051.4	7619.43	1.85929	1.73876	0.894748	0.798061	1.16454	1.46629	0.219759	0.552173
	0.621987	0.739878	0.731994	0.870312					678	4933421E11Rik	6979.07	10998.8	15819.5			1.57596	2.26671			0.656233	1.1806									Ahctf1	27839	42844	46492.1	4165.7	6918.95	7615.14	1.53899	1.67003	0.621987	0.739878	1.66093	1.82806	0.731994	0.870312
	0.798674	0.894599	0.689266	0.1014					679	4933421O10Rik	9581.73	11505.5	11111.9			1.20078	1.15969			0.263969	0.213745									Snhg4	20331.7	35366.9	37798.4	7090.28	11432.8	7606.55	1.7395	1.85909	0.798674	0.894599	1.61246	1.07281	0.689266	0.1014
	0.779836	0.910549	0.791748	0.273838					680	4933424B01Rik	27602.8	53915.8	57685.6			1.95327	2.08985			0.965895	1.0634									Ccdc77	28028	48122.2	52685.8	6291.5	10891.7	7606.55	1.71694	1.87976	0.779836	0.910549	1.73117	1.20902	0.791748	0.273838
	0.552211	1.19365	0.970815	0.983167					681	4933426M11Rik	18368.9	34142.9	31299.7			1.85873	1.70395			0.89432	0.768881									Pnp	21963.7	32206	50237.6	3847.91	7541.7	7606.55	1.46633	2.2873	0.552211	1.19365	1.95995	1.9768	0.970815	0.983167
	0.851772	0.987338	0.783616	1.02152					682	4933427D14Rik	7258.24	13837.5	20930.9			1.90646	2.88374			0.930897	1.52794									Pelp1	19666	35491.5	38988.2	3744.84	6446.52	7602.25	1.80472	1.98252	0.851772	0.987338	1.72144	2.03006	0.783616	1.02152
	0.973591	1.27652	1.36574	1.18075					683	4933427E11Rik	16290.2	27911.3	26630.7			1.71338	1.63477			0.776843	0.709084									Nprl3	22049.6	43299.3	53416.1	3349.74	8632.58	7593.66	1.96372	2.42254	0.973591	1.27652	2.57709	2.26694	1.36574	1.18075
	0.426057	0.147361	-0.10339	0.128081					684	4933427G17Rik	9663.33	23797	27292.2			2.46261	2.8243			1.30019	1.4979									Gm13161	15912.3	21379.1	17623.5	6948.56	6468	7593.66	1.34356	1.10754	0.426057	0.147361	0.93084	1.09284	-0.103394	0.128081
	1.59349	1.91703	0.247776	0.525167					685	4933428G20Rik	3160.98	3800.82	4424.13			1.20242	1.39961			0.265939	0.485022									Ogdh	12983.2	39180.6	49030.6	5273.69	6261.85	7589.37	3.01779	3.77646	1.59349	1.91703	1.18738	1.4391	0.247776	0.525167
	0.88545	0.525877	0.277174	-0.1114					686	4933430I17Rik	4024.24	6613.85	4024.67			1.6435	1.00011			0.716774	0.000154147									2310036O22Rik	33770.1	62384.9	48622.5	8193.98	9929.62	7585.07	1.84734	1.43981	0.88545	0.525877	1.21182	0.925688	0.277174	-0.111402
	0.683547	0.911286	0.966677	0.909011					687	4933431E20Rik	3848.15	4758.54	8706.52			1.23658	2.26252			0.306354	1.17793									Vcl	23149	37179.3	43536.9	4032.57	7880.99	7572.19	1.60608	1.88072	0.683547	0.911286	1.95433	1.87776	0.966677	0.909011
	0.628669	0.628119	0.582644	0.556759					688	4933431K23Rik	6090.05	5754.91	9084.51			0.944969	1.4917			-0.0816607	0.576955									Arf6	21671.6	33507.3	33494.6	5144.86	7704.9	7567.89	1.54614	1.54555	0.628669	0.628119	1.49759	1.47096	0.582644	0.556759
	0.75608	1.20307	0.477819	0.610744					689	4933432B09Rik	4153.09	4071.38	6726.4			0.980325	1.61961			-0.0286673	0.695649									Peli1	19992.4	33765	46028.2	4955.9	6901.77	7567.89	1.6889	2.30229	0.75608	1.20307	1.39264	1.52705	0.477819	0.610744
	0.690222	1.0931	-0.63706	0.013343					690	4933433G15Rik	14026.9	29749.5	30045.5			2.12089	2.14199			1.08467	1.09895									Fam116b	18038.2	29105.2	38481.4	7493.97	4818.79	7563.6	1.61353	2.13332	0.690222	1.0931	0.643022	1.00929	-0.637059	0.0133429
	0.608816	1.00047	-0.45496	0.420411					691	4933433P14Rik	12008.3	23500.7	26957.2			1.95703	2.24488			0.968669	1.16664									Kazn	19378.2	29551.9	38769.2	5651.61	4123.03	7563.6	1.52501	2.00066	0.608816	1.00047	0.729532	1.33831	-0.454957	0.420411
	0.394598	0.72017	0.273796	0.20505					692	4933434E20Rik	4866.02	4084.27	7478.08			0.839345	1.5368			-0.252664	0.619926									Cnpy2	26988.6	35478.6	44460.4	6557.76	7928.23	7559.3	1.31458	1.64738	0.394598	0.72017	1.20898	1.15273	0.273796	0.20505
	0.587815	1.43022	0.814579	1.28768					693	4933436C20Rik	9105.01	25171.3	19784			2.76455	2.17287			1.46705	1.1196									2810408A11Rik	12150	18261.1	32742.9	3096.36	5445.83	7559.3	1.50297	2.69488	0.587815	1.43022	1.75878	2.44135	0.814579	1.28768
	0.70588	0.660076	-0.09552	-0.29075					694	4933439C10Rik	7859.51	10346	23520.9			1.31636	2.99267			0.396556	1.58143									Il4i1	21985.2	35860.8	34740.2	9241.85	8649.76	7555.01	1.63114	1.58017	0.70588	0.660076	0.935934	0.817478	-0.0955216	-0.290748
	0.887672	0.984306	0.268558	0.61455					695	4933439F18Rik	10883.1	19167.3	31647.6			1.7612	2.90797			0.816562	1.54001									Zfc3h1	17492.8	32364.9	34607	4934.43	5944.03	7555.01	1.85019	1.97836	0.887672	0.984306	1.2046	1.53108	0.268558	0.61455
	0.960817	1.10966	0.729702	0.395109					696	4933440N22Rik	24424.6	38837.1	46925.9			1.59008	1.92125			0.669098	0.942049									Acsl3	25107.5	48869.5	54180.6	5741.8	9521.61	7550.71	1.94641	2.15795	0.960817	1.10966	1.6583	1.31504	0.729702	0.395109
	0.893683	1.2626	1.59862	1.31555					697	5031425E22Rik	21293.7	36225.9	31815.1			1.70125	1.49411			0.766595	0.579286									Tex19.1	21074.7	39154.9	50564	3031.94	9182.32	7546.42	1.85791	2.39928	0.893683	1.2626	3.02853	2.48897	1.59862	1.31555
	0.486418	0.789181	1.08026	0.949351					698	5031434O11Rik	4621.22	6261.69	12288.8			1.35499	2.65921			0.438278	1.411									Hsp90b1	25854.8	36221.6	44679.5	3908.03	8263.23	7546.42	1.40096	1.72809	0.486418	0.789181	2.11442	1.931	1.08026	0.949351
	0.934148	1.29814	0.939939	0.955707					699	5031439G07Rik	3654.89	10367.4	9595.65			2.83659	2.62543			1.50416	1.39255									Taok1	19309.5	36895.8	47484.3	3890.85	7464.39	7546.42	1.91076	2.45912	0.934148	1.29814	1.91845	1.93953	0.939939	0.955707
	0.668656	0.699832	0.094627	0.20827					700	5033403F01Rik	4887.5	9787.64	15815.2			2.00259	3.23585			1.00186	1.69414									Rbm12	26258.5	41740.3	42652.1	6531.99	6974.79	7546.42	1.58959	1.62432	0.668656	0.699832	1.06779	1.1553	0.0946272	0.20827
	0.72146	1.11519	0.886184	1.05968					701	5033411D12Rik	9452.89	19098.6	23151.5			2.02039	2.44915			1.01464	1.29228									Gm16719	20696.7	34125.8	44834.1	3620.3	6691.33	7546.42	1.64885	2.16624	0.72146	1.11519	1.84828	2.08447	0.886184	1.05968
	1.13206	1.53945	0.421639	0.901733					702	5033417F24Rik	3500.27	8404.75	7478.08			2.40117	2.13643			1.26374	1.0952									Rad50	11578.8	25377.4	33657.8	4036.87	5407.18	7542.12	2.19171	2.90684	1.13206	1.53945	1.33945	1.86831	0.421639	0.901733
	0.622551	1.02113	0.526163	1.04693					703	5133400J02Rik	11441.4	19540.9	26390.2			1.70792	2.30655			0.772237	1.20574									Snf8	14954.5	23023.9	30350.4	3650.36	5256.86	7542.12	1.5396	2.02951	0.622551	1.02113	1.44009	2.06613	0.526163	1.04693
	0.478869	0.44039	0.518605	-0.06023					704	5133401N09Rik	7176.63	15357.9	19685.2			2.13998	2.74297			1.0976	1.45574									Sesn2	35771.5	49853	48540.9	7854.71	11252.4	7533.53	1.39365	1.35697	0.478869	0.44039	1.43257	0.95911	0.518605	-0.060232
	1.24905	1.56602	0.411297	0.411377					705	5330426P16Rik	3929.76	7245.18	12628.1			1.84367	3.21346			0.88258	1.68413									Rab1	10449.3	24836.3	30938.9	5664.5	7533.11	7533.53	2.37684	2.96086	1.24905	1.56602	1.32988	1.32995	0.411297	0.411377
	0.561993	0.873023	0.954186	0.40401					706	5330430P22Rik	9366.99	21005.4	25801.7			2.2425	2.75454			1.1651	1.46181									Rps15a	20061.1	29616.3	36741.8	5690.26	11024.8	7529.24	1.47631	1.8315	0.561993	0.873023	1.93749	1.32318	0.954186	0.40401
	0.503731	1.33704	0.830384	1.04957					707	5330438D12Rik	12111.4	25351.7	21351.8			2.09321	1.76296			1.06572	0.817996									Tuba1a	16401.9	23255.8	41436.5	3637.47	6468	7529.24	1.41788	2.52632	0.503731	1.33704	1.77816	2.06991	0.830384	1.04957
	0.811316	0.899431	0.684884	0.673477					708	5430400D12Rik	6098.64	12218.5	14582.5			2.00347	2.3911			1.0025	1.25767									Phb2	16590.9	29113.8	30947.5	4715.4	7580.35	7520.65	1.75481	1.86533	0.811316	0.899431	1.60757	1.59491	0.684884	0.673477
	0.935114	1.06174	0.065368	0.296381					709	5430402O13Rik	11454.3	19970.4	25307.8			1.74349	2.20946			0.801978	1.14369									Sdha	18759.8	35869.4	39160	6124.01	6407.87	7520.65	1.91204	2.08745	0.935114	1.06174	1.04635	1.22806	0.0653682	0.296381
	0.762398	0.684688	0.459187	-0.4128					710	5430403G16Rik	9517.31	20533	20325.2			2.15744	2.13561			1.10932	1.09465									Mcph1	35642.7	60460.9	57290.4	10006.3	13756.3	7516.35	1.69631	1.60735	0.762398	0.684688	1.37477	0.751163	0.459187	-0.412802
	0.747523	0.682525	0.98507	0.425693					711	5430405H02Rik	8748.54	16843.8	14672.7			1.92533	1.67716			0.945108	0.746016									Fanca	26808.2	45008.6	43025.8	5595.78	11076.3	7516.35	1.67891	1.60495	0.747523	0.682525	1.97941	1.34322	0.98507	0.425693
	0.629567	0.530732	0.741079	0.439333					712	5430407P10Rik	7713.49	20318.3	15566.1			2.63412	2.01803			1.39732	1.01295									Dhps	30841.1	47714.2	44554.9	5539.96	9259.63	7512.06	1.5471	1.44466	0.629567	0.530732	1.67143	1.35598	0.741079	0.439333
	0.766595	0.579286	0.254758	0.091252					713	5430411K18Rik	4552.5	8456.28	14483.7			1.8575	3.18148			0.893364	1.6697									5031425E22Rik	21293.7	36225.9	31815.1	7051.63	8413.55	7512.06	1.70125	1.49411	0.766595	0.579286	1.19314	1.06529	0.254758	0.0912518
	0.906937	1.16161	0.664573	0.266843					714	5430416N02Rik	29045.8	41190.6	45551.4			1.41812	1.56826			0.503983	0.649164									Trrap	20220	37913.7	45233.6	6239.97	9890.97	7507.76	1.87506	2.23707	0.906937	1.16161	1.5851	1.20317	0.664573	0.266843
	0.786389	0.848875	1.17859	1.05831					715	5430437P03Rik	11256.7	22680.4	17563.4			2.01483	1.56026			1.01066	0.641785									Ppp1ca	21895	37763.4	39434.9	3603.12	8155.86	7503.47	1.72475	1.8011	0.786389	0.848875	2.26355	2.08249	1.17859	1.05831
	1.02477	1.00447	1.38818	0.8638					716	5530401N12Rik	6283.31	9933.66	12009.6			1.58096	1.91135			0.660801	0.93459									Specc1l	23647.2	48113.6	47441.3	4118.46	10780	7494.88	2.03464	2.00621	1.02477	1.00447	2.61748	1.81983	1.38818	0.8638
	0.583294	1.00274	0.713556	0.371513					717	5530601H04Rik	3642	3783.64	3487.76			1.03889	0.95765			0.0550439	-0.0624302									Psme4	21512.7	32231.8	43107.4	5793.33	9500.14	7494.88	1.49827	2.00381	0.583294	1.00274	1.63984	1.29371	0.713556	0.371513
	0.353199	0.598264	0.927443	0.201352					718	5730403B10Rik	11600.3	18415.7	24019.2			1.58752	2.07057			0.666777	1.05003									Eif3a	26116.8	33361.3	39538	6514.82	12390.5	7490.58	1.27739	1.51389	0.353199	0.598264	1.9019	1.14978	0.927443	0.201352
	0.484373	0.260672	0.251767	0.016845					719	5730405O15Rik	23458.3	29504.7	35350.1			1.25775	1.50694			0.330846	0.591618									2810004N23Rik	29556.9	41349.5	35410.2	7390.9	8800.08	7477.7	1.39898	1.19804	0.484373	0.260672	1.19066	1.01174	0.251767	0.0168445
	0.236009	0.596819	0.29874	0.818969					720	5730409E04Rik	6485.17	11862	8410.15			1.82909	1.29683			0.87113	0.374987									Zfp219	20391.8	24016	30840.1	4238.71	5213.91	7477.7	1.17773	1.51238	0.236009	0.596819	1.23007	1.76415	0.29874	0.818969
	0.801281	0.620093	0.45236	0.141165					721	5730419I09Rik	14568	26665.8	24461.6			1.83044	1.67913			0.872189	0.747715									Mau2	24386	42496.2	37480.6	6776.78	9272.51	7473.4	1.74265	1.53697	0.801281	0.620093	1.36828	1.1028	0.45236	0.141165
	0.789809	0.863164	1.07747	0.828407					722	5730420D15Rik	5377.11	5948.17	15501.6			1.1062	2.8829			0.145615	1.52752									Mrpl12	26597.8	45983.5	48382	4208.65	8881.68	7473.4	1.72885	1.81902	0.789809	0.863164	2.11034	1.77572	1.07748	0.828407
	0.640052	0.760697	0.698945	0.467301					723	5730422E09Rik	13932.4	16083.7	17086.6			1.15441	1.2264			0.207157	0.294424									Nubp1	27787.5	43303.6	47080.5	5402.53	8770.02	7469.11	1.55839	1.69431	0.640052	0.760697	1.62332	1.38252	0.698945	0.467301
	0.6664	0.7949	0.366597	0.246549					724	5730437N04Rik	10281.8	24179.2	19522			2.35165	1.8987			1.23368	0.925012									Cse1l	29471	46773.7	51131	6295.79	8117.21	7469.11	1.58711	1.73496	0.6664	0.7949	1.28931	1.18637	0.366597	0.246549
	0.778573	1.39423	1.40291	1.09273					725	5730455O13Rik	8447.9	15349.3	20776.2			1.81694	2.45934			0.861507	1.29827									Vcp	14958.8	25660.9	39319	3500.05	9255.33	7464.81	1.71543	2.62848	0.778573	1.39423	2.64434	2.13277	1.40291	1.09273
	0.728238	0.832129	1.10857	0.914762					726	5730455P16Rik	19245.1	32030	37570.8			1.66432	1.95223			0.734933	0.965123									Msh2	25880.5	42874.1	46075.4	3959.57	8538.1	7464.81	1.65661	1.78031	0.728238	0.832129	2.15632	1.88526	1.10857	0.914762
	0.673425	0.933727	1.32609	1.29495					727	5730469M10Rik	4281.93	14760.9	16738.7			3.44726	3.90915			1.78545	1.96685									Sun1	20185.6	32193.1	38558.7	3040.53	7623.3	7460.52	1.59485	1.9102	0.673425	0.933727	2.50723	2.45369	1.32609	1.29495
	1.31601	1.35179	0.961762	1.08308					728	5730494M16Rik	9543.08	20219.5	18465.4			2.11876	1.93495			1.08322	0.952297									Rhbdd3	11600.3	28881.9	29607.3	3521.52	6858.82	7460.52	2.48976	2.55229	1.31601	1.35179	1.94769	2.11855	0.961762	1.08308
	0.744391	1.30045	1.03451	1.26072					729	5730494N06Rik	21061.8	29079.5	36973.7			1.38068	1.75549			0.465375	0.811874									Prpsap2	19219.3	32197.4	47338.2	3113.54	6377.81	7460.52	1.67527	2.46306	0.744391	1.30045	2.04841	2.39615	1.03451	1.26072
	0.753672	0.917265	0.514309	0.102683					730	5730507C01Rik	3349.96	4840.14	5227.35			1.44484	1.56042			0.530905	0.641936									2010003O02Rik	31498.2	53108.4	59485.3	6939.98	9912.44	7451.93	1.68608	1.88853	0.753672	0.917265	1.42831	1.07377	0.514309	0.102683
	0.670227	0.624744	0.996677	0.229657					731	5730508B09Rik	10329	20176.5	25118.8			1.95338	2.43186			0.965975	1.28206									Slc25a4	28839.7	45893.3	44469	6351.62	12674	7447.63	1.59132	1.54194	0.670227	0.624744	1.9954	1.17256	0.996677	0.229657
	0.940234	0.736632	0.818239	0.532447					732	5730528L13Rik	10402	14795.3	22236.6			1.42234	2.13772			0.50827	1.09607									Mrpl2	17737.6	34035.6	29555.8	5149.15	9079.25	7447.63	1.91884	1.66628	0.940234	0.736632	1.76325	1.44638	0.818239	0.532447
	0.754721	0.757855	0.533247	-0.65598					733	5730559C18Rik	6240.37	6098.49	12709.7			0.977264	2.03669			-0.0331795	1.02623									Fn1	26168.3	44153.9	44249.9	11728.4	16973.1	7443.34	1.68731	1.69097	0.754721	0.757855	1.44718	0.634643	0.533247	-0.655983
	0.868994	0.823603	1.14891	0.501842					734	5730577I03Rik	9182.31	23002.5	19380.3			2.50509	2.11061			1.32486	1.07766									Ckb	23136.2	42255.7	40946.9	5256.52	11656.1	7443.34	1.82639	1.76982	0.868994	0.823603	2.21746	1.41602	1.14891	0.501842
	1.03206	1.1228	0.381611	0.384191					735	5730588L14Rik	8911.74	12622.1	13581.7			1.41635	1.52402			0.502179	0.607881									Rbbp4	20426.1	41770.3	44481.9	5703.15	7430.04	7443.34	2.04495	2.17769	1.03206	1.1228	1.3028	1.30513	0.381611	0.384191
	0.367369	0.541806	0.545309	1.23567					736	5730590G19Rik	12755.6	28903.4	28374.6			2.26594	2.22448			1.18011	1.15347									Ephb3	25025.9	32283.3	36432.5	3160.78	4612.63	7443.34	1.29	1.45579	0.367369	0.541806	1.45933	2.35491	0.545309	1.23567
	0.579959	0.749052	1.24169	1.02116					737	5830403L16Rik	27121.8	40640.8	51685.1			1.49846	1.90567			0.58348	0.930297									Alkbh1	16238.7	24273.7	27292.2	3663.24	8662.65	7434.75	1.49481	1.68069	0.579959	0.749052	2.36475	2.02956	1.24169	1.02116
	0.579959	0.749052	1.24169	1.02116					738	5830415F09Rik	16663.9	24325.2	30367.6			1.45976	1.82236			0.54573	0.865809									Alkbh1	16238.7	24273.7	27292.2	3663.24	8662.65	7434.75	1.49481	1.68069	0.579959	0.749052	2.36475	2.02956	1.24169	1.02116
	0.844233	0.962047	0.551966	0.557892					739	5830417I10Rik	21487	35388.4	39430.6			1.64697	1.8351			0.719816	0.875855									Arf1	24218.5	43479.6	47179.3	5050.38	7404.27	7434.75	1.79531	1.94807	0.844233	0.962047	1.46608	1.47212	0.551966	0.557892
	0.695819	0.448832	0.984292	0.378436					740	5830418K08Rik	24562	32979.1	34310.7			1.34268	1.3969			0.425121	0.482226									Gm13248	15929.5	25802.6	21742.7	5716.03	11308.3	7430.45	1.6198	1.36493	0.695819	0.448832	1.97834	1.29993	0.984292	0.378436
	0.824039	1.02286	0.374527	0.59686					741	5830428H23Rik	6120.11	17762.9	15656.3			2.90239	2.55817			1.53724	1.35511									Fam71e1	18948.7	33546	38502.8	4912.95	6369.22	7430.45	1.77036	2.03195	0.824039	1.02286	1.29641	1.51242	0.374527	0.59686
	0.639108	1.10209	0.124148	0.406607					742	5830433M19Rik	13296.8	23569.4	31394.2			1.77257	2.36104			0.82584	1.23942									Crebzf	20649.5	32158.8	44327.2	5595.78	6098.64	7417.57	1.55737	2.14665	0.639108	1.10209	1.08986	1.32556	0.124148	0.406607
	1.07118	1.66819	0.247431	0.580551					743	5830454E08Rik	11806.4	28413.8	27159			2.40664	2.30036			1.26702	1.20186									Myh10	18502.1	38875.7	58802.3	4960.19	5888.2	7417.57	2.10116	3.17815	1.07118	1.66819	1.18709	1.49542	0.247431	0.580551
	0.754821	0.886789	0.324412	-0.06759					744	5930412G12Rik	6055.69	20842.2	14608.2			3.44176	2.41231			1.78315	1.27042									Degs1	29325	49483.7	54223.6	7768.82	9727.76	7413.27	1.68742	1.84906	0.754821	0.886789	1.25215	0.954234	0.324412	-0.0675854
	0.803371	0.926688	0.845998	0.585973					745	5930416I19Rik	21972.3	35036.2	38391.2			1.59457	1.74726			0.673164	0.805091									Psmd2	17733.3	30947.7	33709.3	4938.72	8877.39	7413.27	1.74517	1.90091	0.803371	0.926688	1.79751	1.50105	0.845998	0.585973
	0.736555	1.31174	0.646268	1.02804					746	5930434B04Rik	11699.1	17178.8	22949.7			1.46839	1.96167			0.554239	0.972079									Commd1	16470.6	27443.2	40886.7	3633.18	5686.34	7408.98	1.66619	2.48241	0.736555	1.31174	1.56511	2.03925	0.646268	1.02804
	0.655768	1.39869	0.584477	1.05649					747	6030442K20Rik	4956.22	12768.2	11717.5			2.57619	2.3642			1.36524	1.24135									Cdk12	15246.6	24020.3	40199.5	3560.17	5338.46	7404.68	1.57545	2.63662	0.655768	1.39869	1.4995	2.07987	0.584477	1.05649
	0.872189	0.747715	0.720667	1.05044					748	6030443J06Rik	13550.1	19201.7	24697.8			1.41708	1.8227			0.502923	0.866077									5730419I09Rik	14568	26665.8	24461.6	3573.06	5888.2	7400.38	1.83044	1.67913	0.872189	0.747715	1.64794	2.07116	0.720667	1.05044
	1.00692	1.30597	0.205339	1.11064					749	6030445D17Rik	6257.54	13863.3	14866			2.21546	2.37569			1.14761	1.24834									Trim37	16006.8	32167.4	39576.7	3427.04	3951.23	7400.38	2.00961	2.4725	1.00692	1.30597	1.15296	2.15941	0.205339	1.11064
	0.956909	1.11906	0.673996	0.225501					750	6030446N20Rik	6558.18	11058.9	17086.6			1.68627	2.60539			0.753838	1.3815									Rps25	14022.6	27219.9	30457.8	6325.86	10092.8	7396.09	1.94115	2.17206	0.956909	1.11906	1.59549	1.16918	0.673996	0.225501
	0.740801	0.899117	0.460324	0.068806					751	6030458C11Rik	16496.4	25871.3	30513.6			1.5683	1.84972			0.649205	0.887305									Topors	31970.6	53426.2	59622.7	7051.63	9701.99	7396.09	1.6711	1.86492	0.740801	0.899117	1.37585	1.04885	0.460324	0.068806
	0.849984	0.491209	0.589757	0.268245					752	6230400D17Rik	16290.2	24613	23594			1.5109	1.44835			0.595412	0.53441									Gm13152	12244.5	22070.5	17211.2	6141.19	9242.45	7396.09	1.80248	1.40562	0.849984	0.491209	1.50499	1.20434	0.589757	0.268245
	1.48034	1.74203	0.125284	0.701556					753	6230409E13Rik	6884.59	5948.17	7585.46			0.863983	1.1018			-0.210925	0.139866									Fam114a2	13593.1	37926.6	45469.8	4547.92	4960.52	7396.09	2.79014	3.34507	1.48034	1.74203	1.09072	1.62626	0.125284	0.701556
	0.784459	0.887574	-0.12009	0.02725					754	6230427J02Rik	5432.94	12566.3	11111.9			2.31299	2.04528			1.20976	1.0323									Leng8	20567.9	35427.1	38051.8	7253.48	6674.15	7391.79	1.72245	1.85006	0.784459	0.887574	0.920131	1.01907	-0.120089	0.0272504
	0.718783	0.768126	0.743186	0.149384					755	6330403K07Rik	8168.74	10427.6	27807.6			1.27652	3.40415			0.352216	1.76729									Mpzl1	29891.9	49195.9	50907.6	6660.83	11149.4	7387.5	1.64579	1.70306	0.718783	0.768126	1.67387	1.1091	0.743186	0.149384
	1.06872	1.11029	0.649705	0.206302					756	6330403L08Rik	8662.64	23539.3	16210.4			2.71734	1.8713			1.44219	0.904038									Slc3a2	19137.7	40142.7	41316.3	6403.16	10045.6	7387.5	2.09757	2.15889	1.06872	1.11029	1.56885	1.15373	0.649705	0.206302
	1.21042	1.33131	0.653063	0.55031					757	6330408A02Rik	10951.8	20082.1	21390.5			1.83368	1.95315			0.874742	0.965803									Mrps7	21822	50497.2	54910.8	5041.79	7928.23	7383.2	2.31406	2.51631	1.21042	1.33131	1.5725	1.4644	0.653063	0.55031
	0.815001	0.984218	0.841678	0.85271					758	6330409N04Rik	16487.8	34181.6	41393.6			2.07315	2.51056			1.05182	1.32801									Kbtbd2	20915.8	36797.1	41376.4	4088.4	7326.96	7383.2	1.7593	1.97824	0.815001	0.984218	1.79213	1.80589	0.841678	0.85271
	1.11738	1.25962	0.792265	1.02218					759	6330416G13Rik	14018.3	30067.3	29723.3			2.14486	2.12033			1.10089	1.08429									Phf16	20108.3	43625.7	48145.8	3633.18	6291.91	7378.91	2.16953	2.39432	1.11738	1.25962	1.73179	2.03098	0.792265	1.02217
	0.518497	0.937741	0.49006	0.851871					760	6330418K02Rik	10307.5	21138.6	25200.4			2.05078	2.44485			1.03618	1.28974									Fam100b	25004.4	35817.9	47896.6	4088.4	5742.17	7378.91	1.43246	1.91553	0.518497	0.937741	1.4045	1.80484	0.49006	0.851871
	1.17114	1.38068	0.880494	0.790197					761	6330503K22Rik	5969.79	10367.4	11477			1.73665	1.92251			0.796306	0.942991									Nap1l4	16535	37235.1	43055.8	4264.48	7850.93	7374.61	2.25189	2.60392	1.17114	1.38068	1.84101	1.72931	0.880494	0.790197
	0.986159	1.21171	0.400063	1.15713					762	6330545A04Rik	6914.65	9508.49	9995.11			1.37512	1.4455			0.45956	0.531566									Tfb1m	10822.9	21439.2	25067.2	3306.8	4363.54	7374.61	1.9809	2.31612	0.986159	1.21171	1.31957	2.23013	0.400063	1.15713
	0.778808	1.11263	0.842378	0.844141					763	6330549D23Rik	12978.9	25317.3	22584.6			1.95065	1.74009			0.963953	0.799165									Manf	20473.4	35126.4	44271.4	4105.58	7361.32	7370.32	1.71571	2.16239	0.778808	1.11263	1.793	1.7952	0.842378	0.844141
	1.06143	1.19458	0.277381	0.745008					764	6330578E17Rik	11724.8	20782.1	19517.7			1.77248	1.66465			0.825773	0.735217									Josd1	15689	32742.9	35908.5	4397.61	5329.87	7370.32	2.087	2.28878	1.06143	1.19458	1.21199	1.67598	0.277381	0.745008
	0.594463	0.739403	0.921721	0.670026					765	6430527G18Rik	21607.2	34435	40448.6			1.59368	1.872			0.672362	0.904577									Gm10492	21156.3	31944	35320.1	4629.51	8770.02	7366.02	1.50991	1.66948	0.594463	0.739403	1.89437	1.5911	0.921721	0.670026
	0.636117	0.518198	0.671859	0.510545					766	6430531B16Rik	5209.61	8778.39	9389.47			1.68504	1.80234			0.752781	0.849868									Nfat5	24257.1	37699	34740.2	5170.63	8237.46	7366.02	1.55414	1.43217	0.636117	0.518198	1.59313	1.42459	0.671859	0.510545
	1.2854	1.14123	0.38745	0.759747					767	6430548M08Rik	3646.3	6575.2	8543.3			1.80325	2.34301			0.850602	1.22836									Rad51ap1	14821.4	36127.1	32691.3	4350.37	5690.63	7366.02	2.4375	2.20569	1.2854	1.14123	1.30808	1.69319	0.38745	0.759747
	0.953091	0.893026	1.09017	0.966893					768	6430550D23Rik	7382.79	10011	11008.8			1.35599	1.49114			0.439344	0.576418									Rbl1	22234.2	43045.9	41290.5	3766.31	8018.43	7361.73	1.93602	1.85707	0.953091	0.893026	2.12899	1.95463	1.09017	0.966893
	0.50238	0.795115	0.043975	0.333936					769	6430571L13Rik	4981.98	5531.59	7933.37			1.11032	1.59241			0.150975	0.671215									Nap1l1	21444	30376.5	37210	5840.57	6021.34	7361.73	1.41655	1.73522	0.50238	0.795115	1.03095	1.26045	0.0439754	0.333936
	0.038192	0.912675	-0.46694	0.389077					770	6430573F11Rik	3684.95	3916.78	5708.42			1.06291	1.54912			0.0880231	0.631446									Utf1	21753.2	22336.8	40951.2	5621.55	4067.19	7361.73	1.02683	1.88253	0.0381922	0.912675	0.7235	1.30956	-0.466936	0.389077
	0.704968	1.11448	1.00627	0.418302					771	6430590A07Rik	7309.77	11492.6	16760.2			1.57223	2.29285			0.652812	1.19714									Ccm2	21169.1	34508	45834.9	5505.6	11059.2	7357.43	1.63011	2.16517	0.704968	1.11448	2.00871	1.33635	1.00627	0.418302
	0.588816	0.755132	0.59948	0.166943					772	6430598A04Rik	9989.74	16624.8	20716.1			1.66419	2.07374			0.73482	1.05223									Tmpo	30768	46275.5	51929.9	6553.47	9929.62	7357.43	1.50401	1.68779	0.588816	0.755132	1.51517	1.12268	0.59948	0.166943
	1.35871	1.49916	0.739442	0.501692					773	6530401F13Rik	5772.23	11707.4	13276.7			2.02822	2.3001			1.02022	1.2017									Mpg	16384.7	42019.4	46316	5196.39	8675.53	7357.43	2.56455	2.82678	1.35871	1.49916	1.66953	1.41587	0.739442	0.501692
	0.855545	0.817415	0.248338	0.252634					774	6530401N04Rik	25390.9	41147.6	39898.8			1.62056	1.57138			0.696495	0.652032									Stmn1	27074.5	48989.8	47711.9	6175.55	7335.55	7357.43	1.80944	1.76225	0.855545	0.817415	1.18784	1.19138	0.248338	0.252634
	1.06602	1.49682	1.20164	1.21696					775	6530418L21Rik	6674.14	11458.3	17434.5			1.71682	2.61225			0.779738	1.38529									Emd	15263.8	31956.9	43077.3	3165.08	7279.72	7357.43	2.09365	2.82219	1.06602	1.49682	2.30001	2.32456	1.20164	1.21696
	0.560219	0.596815	0.704728	-0.35705					776	6720401G13Rik	19313.8	28693	35564.9			1.48562	1.84143			0.571066	0.880823									Srsf5	30772.3	45373.6	46539.3	9417.92	15349.7	7353.14	1.47449	1.51237	0.560219	0.596815	1.62984	0.780761	0.704728	-0.357048
	0.677807	1.09011	0.357925	0.957799					777	6720456B07Rik	11119.3	24913.6	28434.7			2.24058	2.55725			1.16387	1.35459									Atp6v0a1	20194.2	32304.8	42991.4	3783.49	4848.85	7348.84	1.59971	2.1289	0.677807	1.09011	1.28158	1.94234	0.357925	0.957799
	0.932307	0.99723	0.365402	0.170099					778	6720456H20Rik	5759.35	18445.8	16352.1			3.20275	2.83923			1.67931	1.5055									D2hgdh	22264.3	42487.6	44443.2	6527.7	8409.25	7344.55	1.90833	1.99616	0.932307	0.99723	1.28824	1.12514	0.365402	0.170099
	0.93202	1.20253	0.327198	0.354564					779	6720463M24Rik	15457	20460	29169.2			1.32367	1.88712			0.404542	0.916183									Luc7l3	17411.2	33219.6	40070.6	5737.5	7198.12	7335.96	1.90795	2.30143	0.93202	1.20253	1.25457	1.2786	0.327198	0.354564
	0.811765	0.928813	0.648422	0.60685					780	6720483E21Rik	6717.09	7129.22	10321.5			1.06136	1.53661			0.0859079	0.619751									Prpf4	17892.2	31407.2	34061.5	4814.18	7546	7331.66	1.75536	1.90371	0.811765	0.928813	1.56745	1.52293	0.648422	0.60685
	0.980459	1.16537	1.41734	1.21497					781	6820431F20Rik	45980.3	58128.9	47578.8			1.26421	1.03476			0.33824	0.0493027									Fam103a1	13752	27134	30844.4	3156.49	8430.73	7327.37	1.97309	2.2429	0.980459	1.16537	2.67092	2.32137	1.41734	1.21497
	0.691405	0.680523	-0.12258	-0.30645					782	7530422B04Rik	3474.5	4037.03	6030.57			1.1619	1.73567			0.216489	0.795489									Atf5	21568.6	34830.1	34568.4	9061.48	8323.36	7327.37	1.61486	1.60272	0.691405	0.680523	0.918543	0.808628	-0.122581	-0.306451
	0.853951	1.01192	0.853175	0.758189					783	8030453O22Rik	5767.94	11565.6	8702.23			2.00516	1.50872			1.00372	0.593329									U2af2	20189.9	36492.2	40714.9	4324.6	7812.27	7314.48	1.80744	2.0166	0.853951	1.01192	1.80647	1.69137	0.853175	0.758189
	0.823529	1.16068	0.948966	0.462893					784	8030462N17Rik	9388.46	25403.2	23237.4			2.70579	2.47511			1.43605	1.30749									Zfp119b	24978.6	44205.4	55842.9	5303.76	10238.9	7310.19	1.76973	2.23563	0.823529	1.16068	1.93049	1.3783	0.948966	0.462893
	1.02325	0.948413	0.972392	0.768851					785	8430406I07Rik	35088.6	50282.5	43051.6			1.43301	1.22694			0.519052	0.295062									Usp5	18347.5	37291	35406	4290.24	8417.84	7310.19	2.03249	1.92975	1.02325	0.948413	1.96209	1.70391	0.972392	0.768851
	0.557205	0.518582	0.557106	-0.05967					786	8430410A17Rik	11789.3	21512.2	28413.2			1.82473	2.41009			0.867681	1.26909									Afg3l1	34526	50802.1	49460.1	7609.92	11196.6	7301.6	1.47142	1.43255	0.557205	0.518582	1.47132	0.959484	0.557106	-0.0596687
	0.90393	0.640263	0.685937	0.111275					787	8430410K20Rik	5845.24	10290.1	13160.7			1.76043	2.25153			0.815926	1.17091									Ing2	31377.9	58713	48906	6759.6	10874.5	7301.6	1.87116	1.55861	0.90393	0.640263	1.60875	1.08018	0.685937	0.111275
	0.813201	0.857415	0.395336	0.09125					788	8430419L09Rik	6313.38	17131.6	14079.9			2.71354	2.23017			1.44018	1.15715									Ptbp1	21929.3	38532.1	39731.3	6854.08	9014.82	7301.6	1.75711	1.81179	0.813201	0.857415	1.31525	1.06529	0.395336	0.0912496
	1.02569	1.31334	1.25553	1.18846					789	8430429K09Rik	13709	25313	34022.9			1.84645	2.48178			0.884751	1.31138									Tmem14c	16350.4	33288.3	40633.3	3203.73	7649.07	7301.6	2.03594	2.48516	1.02569	1.31334	2.38755	2.27909	1.25553	1.18846
	1.13072	1.11217	0.961437	0.998479					790	8430432A02Rik	5123.71	9010.3	7186			1.75855	1.4025			0.814386	0.488									Srrm1	16410.5	35933.8	35474.7	3654.65	7116.51	7301.6	2.18969	2.16171	1.13072	1.11217	1.94725	1.99789	0.961437	0.998479
	0.98376	1.31409	0.138808	0.16459					791	9030025P20Rik	29913.4	43466.8	48094.2			1.45309	1.60778			0.539122	0.685072									Spc25	17110.5	33838	42544.7	6510.52	7168.05	7297.3	1.97761	2.48646	0.98376	1.31409	1.101	1.12085	0.138808	0.16459
	0.964907	0.736414	0.704167	0.798207					792	9030224M15Rik	4153.09	6338.99	8384.38			1.52633	2.01883			0.610068	1.01352									Dnmt1	17531.4	34220.2	29207.9	4191.47	6828.76	7288.71	1.95194	1.66603	0.964907	0.736414	1.6292	1.73894	0.704167	0.798207
	0.962747	1.03844	1.08123	1.22512					793	9030407P20Rik	8898.86	13695.8	12181.4			1.53905	1.36887			0.622044	0.452988									Pik3c2a	18128.4	35332.6	37235.8	3117.84	6596.84	7288.71	1.94902	2.054	0.962747	1.03844	2.11584	2.33774	1.08123	1.22512
	1.32998	1.18196	0.861238	0.345471					794	9030612E09Rik	7760.73	10328.8	9256.32			1.3309	1.19271			0.412406	0.254246									Cecr5	20018.1	50325.4	45418.2	5733.21	10414.9	7284.42	2.51399	2.26886	1.32998	1.18196	1.8166	1.27057	0.861238	0.345471
	0.1534	0.329651	-0.08273	-0.15081					795	9030617O03Rik	5570.37	10887.1	5798.62			1.95446	1.04098			0.966773	0.0579364									Sp110	7348.43	8172.83	9234.84	8082.32	7631.89	7280.12	1.11219	1.25671	0.1534	0.329651	0.94427	0.900746	-0.0827291	-0.150807
	0.776514	0.976004	0.073874	0.048643					796	9030624G23Rik	4608.34	7185.05	7658.48			1.55914	1.66187			0.640751	0.732811									Cox5a	23930.7	40993	47071.9	7038.75	7408.56	7280.12	1.71299	1.96701	0.776514	0.976004	1.05254	1.03429	0.0738739	0.048643
	0.344951	0.700613	-0.0944	0.088862					797	9030624J02Rik	4887.5	12145.4	11326.6			2.485	2.31747			1.31325	1.21255									Slc25a40	25644.3	32571.1	41677.1	6841.2	6407.87	7275.83	1.27011	1.6252	0.344951	0.700613	0.936659	1.06353	-0.0944045	0.0888624
	0.599545	0.725761	0.743009	0.221714					798	9030625A04Rik	6785.81	15241.9	18370.9			2.24615	2.70725			1.16745	1.43683									Mtf2	28255.6	42814	46728.3	6235.67	10436.4	7271.53	1.51524	1.65377	0.599545	0.725761	1.67366	1.16612	0.743009	0.221714
	1.22311	1.46694	1.33849	0.901322					799	9130008F23Rik	3289.83	3521.66	6069.22			1.07047	1.84484			0.0982426	0.883498									Paip2b	16509.3	38540.7	45637.3	3890.85	9839.43	7267.24	2.33449	2.76434	1.22311	1.46694	2.52886	1.86778	1.33849	0.901322
	1.12764	1.43511	0.110975	1.27142					800	9130011E15Rik	11338.3	21628.2	25720.1			1.90753	2.26843			0.931705	1.18169									1810049H13Rik	10930.3	23882.9	29555.8	3010.47	3251.18	7267.24	2.18502	2.70402	1.12764	1.43511	1.07996	2.41399	0.110975	1.27142
	0.949814	0.642611	0.947993	0.073681					801	9130011J15Rik	18106.9	35147.9	28499.2			1.94113	1.57394			0.956896	0.654377									Tfcp2l1	25141.8	48564.6	39250.2	6901.32	13313.9	7262.94	1.93162	1.56115	0.949814	0.642611	1.92919	1.0524	0.947993	0.0736813
	0.890782	1.1844	0.614582	0.668552					802	9130019O22Rik	6772.92	15774.5	17245.5			2.32905	2.54625			1.21974	1.34837									D6Wsu116e	16410.5	30428	37295.9	4569.39	6996.26	7262.94	1.85418	2.27269	0.890782	1.1844	1.53111	1.58948	0.614582	0.668552
	0.464222	1.11457	0.545375	0.712609					803	9130023H24Rik	7631.89	16586.2	18023			2.17327	2.36154			1.11987	1.23973									Gm12279	17016	23474.9	36844.9	4431.96	6468	7262.94	1.37957	2.1653	0.464222	1.11457	1.4594	1.63876	0.545375	0.712609
	0.584927	0.708873	0.366774	0.230128					804	9130230N09Rik	3105.15	6364.76	9303.57			2.04974	2.99617			1.03544	1.58312									Rplp2	16303.1	24454.1	26647.9	6188.43	7979.77	7258.65	1.49996	1.63453	0.584927	0.708873	1.28947	1.17294	0.366774	0.230128
	0.719513	0.828331	0.682727	0.834906					805	9130401M01Rik	3723.6	7193.64	15312.7			1.9319	4.11233			0.950024	2.03995									2010012P19Rik	12240.2	20155.1	21734.1	4066.93	6528.12	7254.35	1.64663	1.77563	0.719513	0.828331	1.60517	1.78374	0.682727	0.834906
	0.5843	0.338563	0.605815	0.442824					806	9230110C19Rik	5415.76	10273	12430.5			1.89686	2.29525			0.923615	1.19865									Gm13157	13159.3	19729.9	16639.9	5333.82	8117.21	7250.06	1.49931	1.2645	0.5843	0.338563	1.52184	1.35926	0.605815	0.442824
	0.580072	1.27352	0.037673	0.670064					807	9230112E08Rik	4500.97	8022.52	4028.97			1.7824	0.895134			0.83382	-0.159825									Myl4	16191.5	24205	39142.8	4556.51	4677.06	7250.06	1.49492	2.4175	0.580072	1.27352	1.02646	1.59114	0.0376727	0.670064
	0.585115	0.514925	0.909992	0.474865					808	9230114K14Rik	8430.72	10784	11734.7			1.27913	1.3919			0.355167	0.477052									Rps14	22006.6	33013.4	31445.7	5213.57	9796.48	7245.76	1.50016	1.42892	0.585115	0.514925	1.87903	1.38979	0.909992	0.474865
	0.739487	0.634383	0.559184	0.876497					809	9230116N13Rik	30334.3	50093.5	52118.9			1.65138	1.71815			0.723675	0.780857									Man1b1	15495.7	25871.3	24053.5	3946.68	5815.18	7245.76	1.66958	1.55227	0.739487	0.634383	1.47344	1.83591	0.559184	0.876497
	0.772533	1.01213	0.621905	0.923522					810	9330020H09Rik	7395.67	13025.9	12623.8			1.76128	1.70692			0.816625	0.771396									Ptrh2	14164.3	24196.4	28567.9	3817.85	5875.31	7241.47	1.70827	2.01689	0.772533	1.01213	1.53891	1.89674	0.621905	0.923522
	0.689363	0.592847	0.097981	0.529739					811	9330104G04Rik	4088.66	10994.5	8388.67			2.68901	2.05169			1.42708	1.03681									Sgol1	21319.5	34379.2	32154.4	5016.02	5368.52	7241.47	1.61257	1.50822	0.689363	0.592847	1.07027	1.44367	0.0979813	0.529739
	0.961121	1.02039	0.709752	0.548781					812	9330111N05Rik	4161.68	7262.35	7452.3			1.74505	1.7907			0.80327	0.84052									Mrfap1	20370.3	39657.3	41320.6	4947.31	8091.44	7237.17	1.94682	2.02847	0.961121	1.02039	1.63552	1.46285	0.709752	0.548781
	0.876473	0.782685	1.263	0.829109					813	9330133O14Rik	13116.4	32386.4	24332.7			2.46916	1.85514			1.30402	0.891531									Ankfy1	21255	39021.7	36565.7	4071.22	9770.71	7232.88	1.83588	1.72033	0.876473	0.782685	2.39995	1.77659	1.263	0.829109
	1.05794	1.15914	1.29277	0.957961					814	9330136K24Rik	5033.52	7189.34	16223.3			1.42829	3.22304			0.514292	1.68842									Ints5	16809.9	34997.6	37540.7	3723.37	9122.19	7232.88	2.08196	2.23325	1.05794	1.15914	2.44998	1.94256	1.29277	0.957961
	0.525909	0.667882	0.407721	0.20215					815	9330151L19Rik	17522.8	25094	32480.9			1.43207	1.85363			0.518105	0.890354									Tfrc	31858.9	45871.8	50615.5	6287.21	8340.54	7232.88	1.43984	1.58874	0.525909	0.667882	1.32659	1.15041	0.407721	0.20215
	1.21399	1.08782	1.41161	1.22915					816	9330154J02Rik	3633.41	11393.9	8113.78			3.13586	2.2331			1.64886	1.15905									Necap1	17926.6	41585.7	38103.4	3083.48	8203.1	7228.58	2.31978	2.12553	1.21399	1.08782	2.66034	2.34429	1.41161	1.22915
	0.809212	0.902801	0.58467	0.439707					817	9330159M07Rik	12824.3	32339.2	34181.8			2.52171	2.66539			1.3344	1.41435									Dr1	22904.2	40134.1	42823.9	5329.52	7992.66	7228.58	1.75225	1.86969	0.809212	0.902801	1.4997	1.35633	0.58467	0.439707
	0.91493	1.3091	0.987724	0.845089					818	9330162012Rik	5110.83	10101.2	10544.9			1.97642	2.06325			0.982891	1.04492									Ccdc43	17445.5	32893.2	43227.7	4023.98	7979.77	7228.58	1.88548	2.47786	0.91493	1.3091	1.98305	1.79638	0.987724	0.845089
	0.276396	0.999358	-0.10002	0.425822					819	9330171B17Rik	3057.91	3006.3	4132.06			0.983122	1.35127			-0.024557	0.434315									Tmem2	23325.1	28250.6	46629.5	5381.06	5020.64	7228.58	1.21117	1.99911	0.276396	0.999358	0.933021	1.34334	-0.100019	0.425822
	0.860285	0.918202	0.587849	-0.17204					820	9330182L06Rik	7421.44	13545.5	15110.8			1.82519	2.0361			0.868044	1.02581									Mapk1	23643	42921.3	44679.5	8129.56	12218.8	7215.7	1.8154	1.88976	0.860285	0.918202	1.503	0.887588	0.587849	-0.172038
	1.0845	1.17095	0.767473	0.283969					821	9330185C12Rik	5256.85	9658.8	13156.4			1.83737	2.50272			0.877645	1.3235									Plekhf2	20675.2	43844.7	46552.2	5926.46	10088.5	7215.7	2.12064	2.25159	1.0845	1.17095	1.70229	1.21754	0.767473	0.283969
	0.813879	0.660542	0.515566	0.216569					822	9430008C03Rik	17209.3	24849.2	25780.2			1.44394	1.49804			0.530009	0.583076									Elavl1	16964.5	29822.5	26815.4	6209.9	8877.39	7215.7	1.75793	1.58068	0.813879	0.660542	1.42955	1.16197	0.515566	0.216569
	0.725102	0.687531	0.703388	0.679622					823	9430015G10Rik	16457.7	32777.2	37897.2			1.9916	2.3027			0.993928	1.20333									Slc9a1	25141.8	41559.9	40491.6	4504.97	7335.55	7215.7	1.65302	1.61053	0.725102	0.687531	1.62832	1.60172	0.703388	0.679622
	1.19112	1.38361	0.167613	0.750081					824	9430016H08Rik	7760.73	17784.4	18224.9			2.29159	2.34834			1.19635	1.23164									Unk	14353.3	32772.9	37450.5	4290.24	4818.79	7215.7	2.28331	2.6092	1.19113	1.38361	1.1232	1.68189	0.167613	0.750081
	0.721758	1.49998	0.858878	0.759365					825	9430020K01Rik	7829.45	19940.3	25041.5			2.54684	3.19837			1.34871	1.67734									Mfsd11	11166.5	18415.7	31583.2	4260.18	7726.38	7211.4	1.64919	2.82838	0.721758	1.49998	1.81363	1.69275	0.858878	0.759365
	0.827242	1.18462	0.393155	0.380404					826	9430023L20Rik	11389.9	24016	28013.8			2.10855	2.45954			1.07625	1.29839									Vamp2	16767	29749.5	38112	5539.96	7275.42	7211.4	1.77429	2.27304	0.827242	1.18462	1.31326	1.30171	0.393155	0.380404
	0.735686	0.651486	0.5315	0.051814					827	9430037G07Rik	10406.3	27718.1	27519.8			2.66357	2.64453			1.41336	1.40301									Mak16	21925	36509.3	34439.5	6952.86	10049.9	7207.11	1.66519	1.57079	0.735686	0.651486	1.44543	1.03657	0.5315	0.0518143
	0.635491	0.876344	0.107169	-0.20467					828	9430038I01Rik	10337.6	25819.8	25926.3			2.49765	2.50796			1.32057	1.32651									Srsf6	24884.2	38656.7	45680.3	8305.64	8946.11	7207.11	1.55347	1.83572	0.635491	0.876344	1.07711	0.867737	0.107169	-0.20467
	0.83153	1.11989	0.768824	0.555757					829	9430065F17Rik	7674.83	13747.4	18435.3			1.79123	2.40205			0.840949	1.26427									Crlf3	24145.5	42968.6	52475.4	4900.07	8349.13	7202.81	1.77957	2.1733	0.83153	1.11989	1.70388	1.46994	0.768824	0.555757
	0.919682	0.90319	0.698438	0.735993					830	9430091E24Rik	12884.4	16143.8	21399.1			1.25297	1.66085			0.325351	0.731918									Ndufv2	17376.8	32871.7	32498.1	4324.6	7017.73	7202.81	1.8917	1.8702	0.919682	0.90319	1.62275	1.66554	0.698438	0.735993
	0.911025	0.956284	1.17247	0.361391					831	9430097D07Rik	6377.8	6347.58	11150.5			0.995262	1.74834			-0.00685218	0.805983									Eif2s2	18497.8	34782.8	35891.3	5600.08	12622.5	7194.22	1.88038	1.94031	0.911025	0.956284	2.25398	1.28466	1.17247	0.361391
	0.877635	1.00137	0.461041	0.816817					832	9530051G07Rik	6867.41	10474.8	12864.4			1.52529	1.87325			0.609085	0.905541									Ehmt1	20391.8	37467.1	40822.3	4084.11	5621.92	7194.22	1.83736	2.0019	0.877635	1.00137	1.37653	1.76151	0.461041	0.816817
	1.11769	0.507051	0.627125	0.054655					833	9530052C20Rik	4681.35	10225.7	9685.85			2.18435	2.06903			1.1272	1.04895									Tbx3	21444	46533.2	30475	6918.5	10685.5	7185.63	2.16998	1.42114	1.11769	0.507051	1.54448	1.03861	0.627125	0.0546554
	0.498005	0.886374	-0.3798	0.093685					834	9530052E02Rik	3676.36	4797.19	6588.95			1.30487	1.79225			0.383912	0.841771									Gm11521	17187.8	24273.7	31772.2	6733.84	5175.26	7185.63	1.41226	1.84852	0.498005	0.886374	0.768545	1.06709	-0.379798	0.0936852
	1.10813	1.0638	0.237832	1.1615					835	9530059O14Rik	6394.98	4110.04	11953.8			0.642698	1.86924			-0.637787	0.902452									Siah2	15998.2	34486.5	33443	3212.32	3788.03	7185.63	2.15565	2.09043	1.10812	1.0638	1.17922	2.2369	0.237832	1.1615
	0.837129	1.11284	1.30514	1.24605					836	9530068E07Rik	17179.3	29040.8	36213.5			1.69046	2.10798			0.757415	1.07586									Capn7	19455.5	34757.1	42076.5	3027.65	7481.57	7181.34	1.78649	2.1627	0.837129	1.11284	2.47108	2.37192	1.30514	1.24605
	0.679651	1.16834	0.311386	0.513143					837	9530077C05Rik	3642	11097.5	11223.6			3.0471	3.0817			1.60744	1.62373									Sgpl1	15822.1	25343.1	35560.6	5028.91	6240.37	7177.04	1.60175	2.24753	0.679651	1.16834	1.2409	1.42716	0.311386	0.513143
	0.386132	1.33535	-0.43383	0.77803					838	9530080O11Rik	9478.66	9379.65	24126.6			0.989554	2.54536			-0.015149	1.34787									Myo1d	18317.4	23938.7	46221.5	4182.88	3096.56	7172.75	1.30689	2.52337	0.386132	1.33535	0.740294	1.71479	-0.43383	0.77803
	0.845574	0.817238	0.27014	0.084723					839	9630014M24Rik	5587.55	3659.09	6464.39			0.654865	1.15693			-0.610731	0.210298									Denr	22217.1	39923.6	39147.1	6759.6	8151.57	7168.45	1.79698	1.76203	0.845574	0.817238	1.20592	1.06048	0.27014	0.0847233
	1.22345	1.22364	0.644857	0.808608					840	9630033F20Rik	23853.4	51016.9	50568.3			2.13877	2.11996			1.09678	1.08404									Ccar1	10496.5	24509.9	24513.1	4092.7	6399.28	7168.45	2.33505	2.33536	1.22345	1.22364	1.56358	1.75152	0.644857	0.808608
	0.990572	0.807572	1.30173	0.40487					841	9830001H06Rik	6227.48	13287.8	18409.5			2.13374	2.95618			1.09339	1.56373									Ddhd2	28457.4	56544.2	49808	5411.12	13339.7	7164.16	1.98697	1.75026	0.990572	0.807572	2.46524	1.32397	1.30173	0.40487
	0.940116	0.976283	0.584484	0.988116					842	9830147E19Rik	9676.22	18050.7	18065.9			1.86547	1.86704			0.899536	0.900756									Fkbp2	16487.8	31634.8	32437.9	3611.71	5415.77	7164.16	1.91868	1.96739	0.940116	0.976283	1.4995	1.98359	0.584484	0.988116
	0.642626	1.05847	0.70687	1.18185					843	9930012K11Rik	9792.18	9096.2	28640.9			0.928925	2.92487			-0.106366	1.54837									Myo19	29050.1	45352.1	60503.3	3152.19	5145.19	7151.27	1.56117	2.08272	0.642626	1.05847	1.63226	2.26867	0.70687	1.18184
	0.828611	0.844444	0.854588	0.524442					844	9930021D14Rik	4281.93	5776.38	6253.92			1.34901	1.46054			0.431904	0.5465									Wdr82	19519.9	34666.9	35049.4	4968.78	8984.76	7146.98	1.77597	1.79557	0.828611	0.844444	1.80824	1.43838	0.854588	0.524442
	0.825478	1.20543	0.411709	0.278549					845	9930021J03Rik	7344.13	11673	15286.9			1.58944	2.08151			0.668514	1.05763									Smtnl2	20490.6	36311.8	47252.3	5892.11	7838.04	7146.98	1.77212	2.30605	0.825478	1.20543	1.33026	1.21297	0.411709	0.278549
	0.886057	1.23978	0.669522	0.640403					846	9930104L06Rik	6094.34	12261.4	14380.6			2.01193	2.35966			1.00858	1.23858									Tsr1	14142.8	26137.6	33400.1	4582.27	7288.31	7142.68	1.84812	2.36163	0.886057	1.23978	1.59055	1.55876	0.669522	0.640403
	0.644751	0.864232	0.151107	0.508686					847	a	20662.3	31686.4	37532.1			1.53353	1.81645			0.616858	0.861121									Srm	16264.5	25429	29607.3	5020.32	5574.67	7142.68	1.56347	1.82037	0.644751	0.864232	1.11042	1.42275	0.151107	0.508686
	0.723312	0.681272	0.720111	0.03088					848	A030003K02Rik	9869.48	18402.8	19406.1			1.86462	1.96627			0.898882	0.975461									Pim1	26421.7	43621.4	42368.6	6987.22	11510.1	7138.39	1.65097	1.60355	0.723312	0.681272	1.64731	1.02164	0.720111	0.0308802
	0.674673	0.695916	0.407482	0.09068					849	A030009H04Rik	5166.66	6085.6	10218.5			1.17786	1.97777			0.236168	0.983874									Rpl31	23978	38274.4	38842.2	6699.48	8885.98	7134.09	1.59624	1.61991	0.674673	0.695916	1.32637	1.06487	0.407482	0.0906803
	0.594025	0.761347	0.293079	0.071388					850	A130006I12Rik	16092.7	30793.1	33576.2			1.91348	2.08643			0.936202	1.06103									Usp9x	26477.5	39966.6	44881.3	6789.67	8319.06	7134.09	1.50945	1.69507	0.594025	0.761347	1.22525	1.05073	0.293079	0.071388
	0.802131	0.896229	0.527298	0.306974					851	A130022J15Rik	3697.84	10612.2	10081			2.86985	2.72619			1.52097	1.44689									Usp48	16406.2	28607.1	30535.1	5763.27	8306.18	7129.8	1.74367	1.8612	0.802131	0.896229	1.44123	1.23711	0.527298	0.306974
	0.642798	1.03597	0.230552	0.667856					852	A130049A11Rik	16036.8	29474.6	44215.6			1.83793	2.75712			0.878082	1.46316									Fam59a	20847	32549.6	42746.6	4487.79	5265.45	7129.8	1.56135	2.05049	0.642798	1.03597	1.17328	1.58871	0.230552	0.667856
	0.489903	0.746388	1.02419	0.556721					853	A230028O05Rik	6781.51	17595.4	11777.6			2.59462	1.73673			1.37552	0.796373									Mysm1	22526.3	31634.8	37789.8	4844.24	9852.31	7125.5	1.40435	1.67759	0.489903	0.746388	2.03382	1.47092	1.02419	0.556721
	1.09462	1.42719	0.490417	0.718991					854	A230046K03Rik	22483.3	37303.8	41535.3			1.65918	1.84738			0.730468	0.885482									Akap10	15104.9	32257.6	40620.4	4328.9	6081.46	7125.5	2.13557	2.68923	1.09462	1.42719	1.40485	1.64603	0.490417	0.718991
	0.981386	0.794807	0.310176	0.624811					855	A230050P20Rik	11252.4	10547.8	13478.6			0.937382	1.19784			-0.0932905	0.260434									Glt25d1	17286.6	34130.1	29989.6	4620.92	5729.29	7125.5	1.97436	1.73484	0.981386	0.794807	1.23986	1.54201	0.310176	0.624811
	0.653906	0.695813	0.049943	0.110441					856	A230051G13Rik	19653.1	32888.9	44722.4			1.67347	2.27559			0.742846	1.18624									Cpne1	25957.9	40842.7	42046.5	6596.41	6828.76	7121.21	1.57342	1.6198	0.653906	0.695813	1.03522	1.07956	0.0499426	0.110441
	0.521557	0.712105	1.30765	0.685763					857	A230052G05Rik	4260.46	4062.8	4793.53			0.953606	1.12512			-0.0685349	0.170079									Tra2a	21487	30844.6	35199.8	4419.08	10938.9	7108.32	1.4355	1.63819	0.521557	0.712105	2.47538	1.60855	1.30765	0.685763
	0.778855	1.00974	0.838561	0.426004					858	A230056P14Rik	12455	21744.1	20647.4			1.74582	1.65776			0.803905	0.729239									Uchl5	17711.8	30389.4	35663.7	5290.87	9461.48	7108.32	1.71577	2.01355	0.778855	1.00974	1.78827	1.34351	0.838561	0.426004
	0.924147	1.01526	0.909736	0.521614					859	A230072C01Rik	10251.7	21108.5	21098.4			2.05902	2.05804			1.04196	1.04127									Cdkn1b	16526.5	31360	33404.4	4951.6	9302.58	7108.32	1.89756	2.02127	0.924147	1.01526	1.8787	1.43556	0.909736	0.521614
	1.31111	1.4349	0.720966	0.520362					860	A230083G16Rik	6682.73	5424.22	5558.09			0.811677	0.831709			-0.301022	-0.265848									Spag7	15577.3	38652.4	42115.2	4955.9	8168.74	7108.32	2.48133	2.70363	1.31111	1.4349	1.64829	1.43431	0.720966	0.520362
	1.00724	0.903553	0.889391	0.647526					861	A230083N12Rik	17810.6	23255.8	27275			1.30573	1.53139			0.384858	0.614843									Gm10069	16578	33322.7	31011.9	4535.03	8400.66	7104.03	2.01005	1.87067	1.00723	0.903553	1.85239	1.56648	0.889391	0.647526
	0.698392	1.03222	0.421853	0.862196					862	A230103J11Rik	9951.08	17346.3	11850.7			1.74316	1.19089			0.801705	0.252044									Sco1	18248.7	29612	37321.7	3908.03	5235.38	7104.03	1.62269	2.04517	0.698392	1.03222	1.33965	1.8178	0.421853	0.862196
	0.440884	0.185017	0.246793	-0.34737					863	A230107N01Rik	9435.71	19588.2	20041.8			2.07596	2.12403			1.05378	1.08681									Gm6483	8482.26	11514.1	9642.89	9027.12	10711.3	7095.44	1.35744	1.13683	0.440884	0.185017	1.18657	0.786014	0.246793	-0.347374
	0.698484	1.04325	1.11808	0.977645					864	A330009N23Rik	8301.88	11071.8	15450.1			1.33364	1.86104			0.415375	0.896107									Tuba1c	18128.4	29418.8	37360.3	3603.12	7820.86	7095.44	1.6228	2.06087	0.698484	1.04325	2.17058	1.96925	1.11808	0.977645
	0.901062	1.13903	0.011426	0.380958					865	A330017A19Rik	4406.48	8181.42	10158.3			1.85668	2.30532			0.892725	1.20496									Nhp2l1	16788.4	31351.4	36973.7	5445.48	5488.78	7091.14	1.86744	2.20233	0.901062	1.13903	1.00795	1.30221	0.0114263	0.380958
	0.317619	0.202565	0.244061	0.103463					866	A330021E22Rik	3620.53	5557.35	7104.39			1.53495	1.96225			0.618196	0.97251									Gm13169	14228.7	17732.9	16373.6	6596.41	7812.27	7086.85	1.24627	1.15074	0.317619	0.202565	1.18432	1.07435	0.244061	0.103463
	0.628508	0.815034	1.05424	0.393203					867	A330023F24Rik	5347.04	7983.87	15033.5			1.49314	2.81155			0.578348	1.49137									1700093J21Rik	29922	46258.3	52642.9	5389.65	11192.3	7078.26	1.54597	1.75934	0.628508	0.815034	2.07663	1.31331	1.05424	0.393203
	0.936482	0.784783	0.396626	0.20286					868	A330035P11Rik	17406.9	27378.8	34602.7			1.57287	1.98788			0.6534	0.991229									4933406P04Rik	25240.6	48306.9	43485.4	6149.78	8095.73	7078.26	1.91386	1.72283	0.936482	0.784783	1.31643	1.15098	0.396626	0.20286
	0.592374	0.733816	0.842789	0.810818					869	A330041J22Rik	6145.88	11346.6	8448.81			1.84622	1.37471			0.884571	0.459129									Gm10518	26280	39623	43704.4	4032.57	7232.47	7073.96	1.50773	1.66303	0.592374	0.733816	1.79351	1.75421	0.842789	0.810818
	0.608301	0.917773	0.366625	0.491042					870	A330069E16Rik	14589.5	23170	23035.6			1.58813	1.57892			0.667327	0.658934									Etv5	22788.3	34739.9	43051.6	5033.2	6489.47	7073.96	1.52446	1.8892	0.608301	0.917773	1.28933	1.40546	0.366625	0.491042
	0.943477	1.47704	0.82826	1.21819					871	A330094K24Rik	4015.65	4707	4711.92			1.17216	1.17339			0.229174	0.230682									Ppm1d	15491.4	29792.4	43124.6	3040.53	5398.59	7073.96	1.92316	2.78377	0.943477	1.47704	1.77554	2.32655	0.82826	1.2182
	0.819776	0.580733	1.13508	0.735097					872	A430005L14Rik	12652.5	26184.8	28043.9			2.06954	2.21646			1.04931	1.14826									Txnl4a	22642.3	39966.6	33864	4247.3	9328.35	7069.67	1.76513	1.49561	0.819776	0.580733	2.1963	1.66451	1.13508	0.735097
	0.786077	0.65971	1.2267	0.267247					873	A430018G15Rik	15916.6	26403.9	27558.5			1.65889	1.73143			0.73022	0.791966									Dnajb1	29299.2	50523	46285.9	5870.64	13739.1	7065.37	1.72438	1.57977	0.786077	0.65971	2.34031	1.20351	1.2267	0.267247
	0.699445	1.00567	0.768584	0.450425					874	A430033K04Rik	5939.73	16057.9	11837.8			2.70348	1.99298			1.43482	0.994929									Ube2d3	21869.2	35512.9	43910.6	5170.63	8808.67	7065.37	1.62388	2.00788	0.699445	1.00567	1.7036	1.36644	0.768584	0.450425
	0.903727	0.853763	0.813295	0.502894					875	A430035B10Rik	3526.04	4462.2	3629.51			1.2655	1.02934			0.339706	0.041726									Map2k1	28285.7	52919.4	51118.1	4985.96	8761.43	7065.37	1.87089	1.80721	0.903727	0.853763	1.75722	1.41705	0.813295	0.502894
	0.895106	0.952094	0.890655	0.832299					876	A430046D13Rik	3800.91	5497.23	6661.97			1.44629	1.75273			0.53236	0.809604									Cct5	17368.2	32300.5	33601.9	3968.15	7357.02	7065.37	1.85975	1.93468	0.895106	0.952094	1.85402	1.78052	0.890655	0.832299
	0.890746	1.12205	0.590169	0.429323					877	A430057M04Rik	10784.3	12115.4	20857.9			1.12343	1.9341			0.16791	0.951661									Dbnl	21117.6	39154.9	45963.8	5243.63	7893.88	7061.08	1.85413	2.17656	0.890746	1.12205	1.50542	1.3466	0.590169	0.429323
	0.766392	0.966129	0.696865	0.808189					878	A430104N18Rik	16560.8	9452.66	43030.1			0.570785	2.59831			-0.80898	1.37757									Gtpbp5	21650.2	36827.1	42295.6	4032.57	6536.71	7061.08	1.70101	1.95359	0.766392	0.966129	1.62098	1.75101	0.696865	0.808189
	0.9359	1.17927	-0.0843	0.764308					879	A430105J06Rik	10127.2	19609.6	16910.5			1.93634	1.66981			0.953332	0.739688									Kdm2b	17106.2	32725.7	38739.1	4157.11	3921.17	7061.08	1.91308	2.26462	0.9359	1.17927	0.943244	1.69856	-0.0842967	0.764308
	0.507243	0.599418	0.609925	-0.44892					880	A430108G06Rik	3715.01	7562.98	8496.06			2.03579	2.28695			1.02559	1.19343									Tuba1b	31760.2	45141.7	48120	9632.65	14701.2	7056.78	1.42133	1.51511	0.507243	0.599418	1.52618	0.73259	0.609925	-0.448923
	0.845585	1.01223	0.708138	0.478943					881	A4galt	29853.2	50875.1	51229.8			1.70417	1.71605			0.769073	0.779094									Akirin1	21456.9	38557.9	43279.2	5063.26	8271.82	7056.78	1.79699	2.01703	0.845585	1.01223	1.63369	1.39372	0.708138	0.478943
	0.794962	0.420987	0.553625	-0.0112					882	A530032D15Rik	5956.91	5454.28	6404.26			0.915622	1.0751			-0.127175	0.104468									AA386476	33881.8	58786	45362.4	7107.46	10432.1	7052.49	1.73503	1.33884	0.794962	0.420987	1.46777	0.992266	0.553625	-0.0112014
	0.859529	0.687424	1.1111	0.724312					883	A530040E14Rik	6953.3	3135.14	7417.94			0.450885	1.06682			-1.14917	0.0933208									Gm16286	21993.7	39906.4	35418.8	4268.77	9220.98	7052.49	1.81445	1.61041	0.859529	0.687424	2.1601	1.65211	1.1111	0.724312
	0.808999	1.1333	0.700635	0.578558					884	A530054K11Rik	7709.19	8911.52	10557.8			1.15596	1.36951			0.209092	0.453657									Grb2	22655.2	39691.7	49696.3	4719.7	7670.55	7048.19	1.752	2.1936	0.808999	1.1333	1.62522	1.49336	0.700635	0.578558
	1.10663	1.08225	0.393878	0.607731					885	A530072M11Rik	3315.6	4470.79	5558.09			1.34841	1.67635			0.43126	0.745319									Lrrc14	13460	28985	28499.2	4625.22	6077.17	7048.19	2.15343	2.11733	1.10663	1.08225	1.31392	1.52386	0.393878	0.607731
	0.708978	0.7717	0.532161	0.34986					886	A630007B06Rik	12837.2	24230.8	24148			1.88754	1.8811			0.916508	0.911576									B230317F23Rik	23724.5	38781.2	40504.4	5527.07	7992.66	7043.9	1.63465	1.70728	0.708978	0.7717	1.44609	1.27444	0.532161	0.34986
	0.722049	0.76936	1.25564	0.88924					887	A630052C17Rik	5819.47	7627.4	6833.78			1.31067	1.1743			0.390304	0.231796									1810063B07Rik	23604.3	38935.8	40233.8	3800.67	9074.95	7039.6	1.64952	1.70451	0.722049	0.76936	2.38772	1.8522	1.25564	0.88924
	0.857746	0.66984	0.660125	0.429662					888	A630055G03Rik	20194.2	27537.7	44426			1.36364	2.19994			0.447465	1.13746									Hspa9	17041.8	30883.3	27111.8	5226.45	8258.94	7039.6	1.8122	1.5909	0.857746	0.66984	1.58022	1.34692	0.660125	0.429662
	0.856248	1.13954	0.937977	0.524341					889	A730011L01Rik	10256	20644.7	31707.7			2.01293	3.09162			1.0093	1.62836									Pip5k1c	19137.7	34645.4	42162.4	4891.48	9371.29	7035.3	1.81032	2.20311	0.856248	1.13954	1.91584	1.43828	0.937977	0.524341
	0.731795	0.806556	0.69075	0.53962					890	A730015C16Rik	3307.01	6725.52	4643.19			2.03372	1.40404			1.02412	0.489589									Swi5	23204.9	38536.4	40586.1	4839.95	7812.27	7035.3	1.6607	1.74903	0.731795	0.806556	1.61412	1.45359	0.69075	0.53962
	0.78492	0.907434	0.875106	0.765002					891	A730017L22Rik	9238.15	17260.4	19479.1			1.86839	2.10855			0.901793	1.07625									Rcn2	26563.4	45768.7	49825.2	4139.94	7593.24	7035.3	1.723	1.87571	0.78492	0.907434	1.83414	1.69937	0.875106	0.765002
	-0.09384	0.479981	0.422816	0.128191					892	A730061H03Rik	7133.69	19824.4	15759.4			2.77898	2.20915			1.47456	1.14349									Cldn4	30085.2	28190.5	41960.6	6433.22	8624	7031.01	0.937022	1.39473	-0.093845	0.479981	1.34054	1.09292	0.422816	0.128191
	0.670999	0.835998	0.524075	-0.01299					893	A730081D07Rik	6807.28	20125	20973.8			2.9564	3.08109			1.56384	1.62344									Trim24	21843.4	34778.6	38992.5	7090.28	10195.9	7026.71	1.59217	1.78509	0.670999	0.835998	1.43801	0.991034	0.524075	-0.0129932
	0.6691	1.08161	1.06605	0.765355					894	A730085A09Rik	3264.06	14181.1	10897.1			4.34463	3.33852			2.11923	1.73921									Gm12089	23995.1	38154.2	50783.1	4131.35	8649.76	7022.42	1.59008	2.11639	0.6691	1.08161	2.09369	1.69979	1.06605	0.765355
	0.528313	0.56129	0.478882	0.504813					895	A830005F24Rik	3397.2	5308.26	5609.63			1.56254	1.65125			0.643893	0.723559									Ddi2	29277.8	42225.6	43201.9	4943.01	6888.89	7013.83	1.44224	1.47559	0.528313	0.56129	1.39366	1.41894	0.478882	0.504813
	0.749391	0.932474	0.680849	0.516515					896	A830007P12Rik	8709.88	26975.1	19401.8			3.09707	2.22756			1.6309	1.15546									Mrps6	24459	41117.6	46681.1	4900.07	7855.22	7009.53	1.68108	1.90855	0.749391	0.932474	1.60308	1.4305	0.680849	0.516515
	0.47235	0.465769	0.443751	-0.05705					897	A830018L16Rik	5359.93	13360.8	14951.9			2.49273	2.78956			1.31772	1.48004									Rps11	21817.7	30269.1	30131.4	7287.83	9912.44	7005.24	1.38737	1.38105	0.47235	0.465769	1.36014	0.961224	0.443751	-0.0570548
	0.731296	0.483364	0.931551	0.383118					898	A830035A12Rik	3165.28	6575.2	8496.06			2.07729	2.68414			1.0547	1.42446									Uba52	19172	31828.1	26802.5	5368.17	10238.9	7000.94	1.66013	1.398	0.731296	0.483364	1.90733	1.30416	0.931551	0.383118
	0.420394	0.856812	0.518934	0.236202					899	A830073O21Rik	3637.71	4707	8805.32			1.29395	2.42057			0.371777	1.27534									Nespas	21796.2	29169.7	39473.6	5943.64	8516.62	7000.94	1.33829	1.81103	0.420394	0.856812	1.4329	1.17789	0.518934	0.236202
	0.44867	0.779769	0.087892	1.09152					900	A830080D01Rik	4101.55	4973.27	6524.52			1.21253	1.59074			0.278026	0.669703									Ccdc120	17235.1	23522.1	29590.2	3285.32	3491.69	7000.94	1.36478	1.71686	0.44867	0.779769	1.06282	2.13098	0.0878916	1.09151
	0.801714	1.08211	1.06225	1.03513					901	A830093I24Rik	8636.87	16706.4	20054.6			1.93431	2.32198			0.951822	1.21536									RP23-381B19.7	15504.3	27026.6	32824.5	3414.16	7129.4	6996.65	1.74317	2.11713	0.801714	1.08211	2.08819	2.0493	1.06225	1.03513
	0.652526	0.651638	0.938321	0.272453					902	A930001C03Rik	3182.46	6940.25	8375.79			2.18078	2.63186			1.12485	1.39608									2310037I24Rik	25605.7	40250	40225.3	5789.04	11093.5	6992.35	1.57192	1.57095	0.652526	0.651638	1.9163	1.20786	0.938321	0.272453
	0.625904	0.640927	0.216084	-0.04347					903	A930001N09Rik	7451.5	7790.6	14788.6			1.04551	1.98465			0.0642036	0.988887									Ccdc21	30162.5	46546.1	47033.3	7206.24	8370.6	6992.35	1.54318	1.55933	0.625904	0.640927	1.16158	0.970319	0.216084	-0.0434693
	0.692919	0.925047	0.87603	0.728011					904	A930002H24Rik	8611.1	15426.6	27442.5			1.79148	3.18688			0.841151	1.67214									Naca	19726.1	31888.2	37454.8	4221.53	7747.85	6992.35	1.61655	1.89875	0.692919	0.925047	1.83532	1.65635	0.87603	0.728011
	0.772237	1.20574	0.745731	1.15642					905	A930006K02Rik	4307.7	8327.44	14900.3			1.93315	3.45899			0.950955	1.79035									5133400J02Rik	11441.4	19540.9	26390.2	3135.01	5256.86	6988.06	1.70792	2.30655	0.772237	1.20574	1.67682	2.22904	0.745731	1.15642
	0.754219	0.9321	0.929592	0.738025					906	A930007I19Rik	5454.41	6287.46	6180.9			1.15273	1.13319			0.205054	0.180394									Ralbp1	21018.8	35452.8	40105	4187.18	7975.48	6983.76	1.68672	1.90805	0.754219	0.9321	1.90474	1.66789	0.929592	0.738025
	0.971741	1.11237	0.633732	0.994861					907	A930012O16Rik	15804.9	34662.6	30771.4			2.19315	1.94695			1.13301	0.961214									Cars	13301	26086.1	28756.9	3504.34	5437.24	6983.76	1.96121	2.162	0.971741	1.11237	1.55157	1.99289	0.633732	0.994861
	0.338395	0.703539	0.988963	0.835089					908	A930015D03Rik	6815.87	13609.9	15278.3			1.9968	2.24158			0.997691	1.16451									Ddx21	20533.5	25961.5	33438.7	3912.33	7765.03	6979.47	1.26435	1.6285	0.338395	0.703539	1.98476	1.78397	0.988963	0.835089
	0.737651	0.883189	0.980159	0.955594					909	A930016O22Rik	3903.99	4625.4	6885.33			1.18479	1.76366			0.244629	0.818576									Uqcrq	17179.3	28645.7	31686.2	3598.82	7099.33	6979.47	1.66746	1.84445	0.737651	0.883189	1.97268	1.93938	0.980159	0.955594
	0.936864	0.980485	1.2803	0.98427					910	A930018P22Rik	9336.93	24797.7	21545.1			2.65587	2.30751			1.40918	1.20634									Ndufa6	20774	39769	40989.8	3525.82	8563.87	6975.17	1.91436	1.97313	0.936864	0.980485	2.4289	1.97831	1.2803	0.98427
	0.557976	0.703772	0.757285	0.671156					911	A930024E05Rik	6850.23	9701.75	8925.58			1.41627	1.30296			0.502093	0.381793									Ran	21426.8	31544.6	34899.1	4380.43	7404.27	6975.17	1.4722	1.62876	0.557976	0.703772	1.69031	1.59235	0.757285	0.671156
	0.760912	1.13342	0.82396	0.943523					912	A930035D04Rik	15079.1	20017.6	24805.2			1.32751	1.64501			0.408723	0.718094									Tbl2	14245.9	24140.6	31252.4	3624.59	6416.46	6970.88	1.69456	2.19378	0.760912	1.13342	1.77026	1.92322	0.82396	0.943523
	0.716257	0.91683	1.36247	1.01627					913	AA386476	33881.8	58786	45362.4			1.73503	1.33884			0.794962	0.420987									Rad52	19017.4	31244	35904.2	3444.22	8855.92	6966.58	1.64291	1.88796	0.716257	0.91683	2.57124	2.02269	1.36246	1.01627
	0.960935	0.954634	0.47803	-0.05398					914	AA414768	8396.36	16427.3	14625.4			1.95647	1.74188			0.968256	0.800641									Mdh2	22607.9	44007.9	43816.1	7227.71	10067	6962.29	1.94657	1.93809	0.960935	0.954634	1.39284	0.963277	0.47803	-0.0539767
	0.561336	1.10163	0.25478	0.318547					915	AA415398	10728.5	17930.4	17730.9			1.6713	1.6527			0.740967	0.724824									1810030O07Rik	18094	26700.2	38829.3	5582.9	6661.26	6962.29	1.47563	2.14597	0.561336	1.10163	1.19315	1.24707	0.25478	0.318547
	0.703133	0.905754	0.975847	0.947707					916	AA474408	14387.6	22207.9	23405			1.54354	1.62674			0.626247	0.701985									Ccnt2	15358.3	25003.8	28774	3607.41	7095.04	6957.99	1.62804	1.87352	0.703133	0.905754	1.9668	1.9288	0.975847	0.947707
	1.06257	0.955339	1.32495	0.580243					917	AA543186	14215.8	24016	21901.6			1.68938	1.54065			0.756498	0.623538									Raf1	23870.6	49857.3	46285.9	4650.99	11651.8	6953.7	2.08865	1.93903	1.06257	0.955339	2.50524	1.4951	1.32495	0.580243
	0.632548	0.426881	1.34386	0.839287					918	AA960436	19386.8	31922.6	30767.1			1.64662	1.58701			0.719503	0.666313									Eri1	19666	30488.1	26437.4	3886.56	9865.2	6953.7	1.5503	1.34432	0.632548	0.426881	2.53829	1.78917	1.34385	0.839287
	0.492146	0.613603	1.26233	0.833621					919	AA987161	4685.64	8305.97	9767.46			1.77264	2.08455			0.825903	1.05974									2700073G19Rik	19743.3	27769.6	30208.7	3899.44	9354.11	6949.4	1.40654	1.53008	0.492146	0.613603	2.39883	1.78215	1.26233	0.833621
	0.76759	1.04866	0.656944	0.267852					920	Aaas	14658.2	28903.4	31450			1.97182	2.14556			0.979531	1.10135									Ranbp17	20035.3	34108.6	41445.1	5771.86	9100.72	6949.4	1.70242	2.0686	0.76759	1.04866	1.57674	1.20401	0.656944	0.267852
	1.13895	1.10784	0.487591	0.437691					921	Aacs	14568	27533.4	34396.6			1.88999	2.3611			0.918378	1.23946									Lypla1	20533.5	45219	44254.2	5127.68	7189.53	6945.11	2.20221	2.15522	1.13895	1.10784	1.4021	1.35444	0.487591	0.437691
	1.10263	1.27315	0.687523	0.535958					922	Aagab	13743.4	31175.3	30436.3			2.26838	2.21461			1.18166	1.14705									Gga3	19885	42702.3	48059.8	4784.12	7704.9	6936.52	2.14746	2.41689	1.10263	1.27315	1.61052	1.44991	0.687523	0.535958
	1.34387	1.38079	0.867166	0.750602					923	Aak1	8645.46	25210	30449.2			2.91598	3.52199			1.54398	1.81639									Fgfr1op2	15220.8	38635.2	39636.8	4122.76	7520.23	6936.52	2.53831	2.60412	1.34387	1.38079	1.82408	1.68249	0.867166	0.750602
	0.179796	0.741911	0.182562	0.315419					924	Aamp	6811.58	19974.7	25088.7			2.93246	3.68324			1.55211	1.88098									Hexim2	15238	17260.4	25483.9	5574.31	6326.27	6936.52	1.13272	1.67239	0.179796	0.741911	1.1349	1.24437	0.182562	0.315419
	1.18506	1.34087	0.353886	-0.80539					925	Aard	9633.27	11870.6	13976.8			1.23225	1.45089			0.301293	0.53694									Gm11175	10745.6	24432.6	27219.2	12114.9	15482.8	6932.22	2.27372	2.53304	1.18506	1.34087	1.278	0.572206	0.353886	-0.805393
	0.73415	0.79963	0.714554	0.48918					926	Aars	4775.83	10895.7	5407.75			2.28142	1.13232			1.18993	0.179277									Calm2	22753.9	37849.3	39606.7	4938.72	8104.32	6932.22	1.66342	1.74065	0.73415	0.79963	1.64098	1.40365	0.714554	0.48918
	0.712413	0.893043	0.545742	0.895047					927	Aars2	14473.5	29642.1	24543.2			2.04802	1.69573			1.03423	0.761908									Ezr	21817.7	35749.2	40517.3	3727.66	5441.53	6932.22	1.63854	1.85709	0.712413	0.893043	1.45977	1.85967	0.545742	0.895047
	1.02426	0.768273	0.559773	0.6656					928	Aarsd1	4230.39	13640	19393.2			3.22429	4.58425			1.68898	2.19669									Urb2	14795.6	30093	25200.4	4367.55	6437.93	6927.93	2.03391	1.70323	1.02426	0.768273	1.47404	1.58623	0.559773	0.6656
	0.651312	1.06986	0.115064	0.556357					929	Aasdh	18648.1	34469.3	39430.6			1.84841	2.11446			0.886287	1.08029									Stt3b	19305.2	30320.7	40525.9	4711.11	5102.24	6927.93	1.5706	2.09922	0.651312	1.06986	1.08302	1.47055	0.115064	0.556357
	0.601887	0.664623	0.287056	0.157956					930	Aasdhppt	16389	24389.7	28739.7			1.48817	1.7536			0.573541	0.810316									Fkbp3	30145.3	45751.5	47784.9	6205.61	7571.76	6923.63	1.5177	1.58515	0.601887	0.664623	1.22015	1.1157	0.287056	0.157956
	1.13491	0.978313	0.515894	0.456366					931	Aatf	13434.2	23483.5	34465.3			1.74804	2.56549			0.805737	1.35924									Puf60	22294.4	48959.7	43923.5	5046.08	7215.29	6923.63	2.19606	1.97016	1.13491	0.978313	1.42988	1.37208	0.515894	0.456366
	0.76645	0.585607	0.886702	0.998386					932	Abat	7009.14	6102.78	15123.7			0.870689	2.15771			-0.199771	1.1095									Zbtb3	16870	28697.2	25316.4	3465.69	6407.87	6923.63	1.70108	1.50067	0.76645	0.585607	1.84894	1.99776	0.886702	0.998386
	0.696495	0.652032	0.316625	0.519099					933	Abca1	4866.02	12184.1	12258.7			2.50391	2.51925			1.32418	1.33299									6530401N04Rik	25390.9	41147.6	39898.8	4831.36	6017.04	6923.63	1.62056	1.57138	0.696495	0.652032	1.24541	1.43306	0.316625	0.519099
	0.140158	0.691951	-0.16983	0.397421					934	Abca2	10509.4	16238.3	22090.6			1.54512	2.10198			0.627719	1.07175									Gm10244	14434.9	15907.6	23319	5256.52	4672.76	6923.63	1.10203	1.61547	0.140158	0.691951	0.888946	1.31715	-0.169833	0.397421
	1.06689	1.2922	0.777626	0.010961					935	Abca3	5832.36	14434.5	14187.3			2.4749	2.43251			1.30737	1.28245									Nucks1	14834.3	31076.5	36329.4	6866.97	11772.1	6919.34	2.09491	2.44902	1.06689	1.2922	1.71431	1.00763	0.777626	0.0109608
	1.23243	1.1657	0.554506	0.617741					936	Abca5	11011.9	16388.6	25720.1			1.48826	2.33567			0.57363	1.22383									Cyb5r3	13228	31080.8	29676.1	4509.27	6622.61	6919.34	2.34962	2.24342	1.23243	1.1657	1.46867	1.53447	0.554506	0.617741
	0.533128	0.944735	0.79112	0.286697					937	Abca7	6751.45	7571.57	12615.2			1.12147	1.86852			0.165395	0.901897									Sf3b1	24274.3	35126.4	46724	5668.79	9809.37	6915.04	1.44706	1.92484	0.533128	0.944735	1.73042	1.21984	0.79112	0.286697
	0.854717	0.949413	0.482788	0.607258					938	Abcb10	22749.6	38265.9	38206.5			1.68204	1.67943			0.750215	0.747974									Fam175a	19013.1	34383.4	36716	4539.33	6343.45	6915.04	1.8084	1.93109	0.854717	0.949413	1.39744	1.52336	0.482788	0.607258
	0.087428	0.185395	0.55315	-0.42736					939	Abcb1b	14198.7	23676.7	21789.9			1.66753	1.53465			0.737715	0.617907									Mt2	36488.7	38768.3	41492.4	9293.38	13636	6910.75	1.06247	1.13713	0.0874276	0.185395	1.46729	0.743621	0.55315	-0.427361
	0.496526	0.981911	1.23374	0.87554					940	Abcb4	3014.96	3981.2	3887.22			1.32048	1.28931			0.401064	0.3666									Jam2	16234.4	22903.7	32064.2	3762.02	8847.33	6902.16	1.41081	1.97508	0.496526	0.981911	2.35175	1.8347	1.23373	0.87554
	0.857262	1.1152	0.610427	0.374204					941	Abcb6	6386.39	15950.5	17073.7			2.49758	2.67345			1.32053	1.4187									Pdcd2	19996.7	36225.9	43317.9	5325.23	8130.09	6902.16	1.8116	2.16625	0.857262	1.1152	1.52671	1.29612	0.610427	0.374204
	0.566	1.13194	1.11499	1.07957					942	Abcb7	10170.1	15516.8	13379.8			1.52572	1.3156			0.609493	0.395718									Igfbp2	18343.2	27155.5	40199.5	3263.85	7069.27	6897.86	1.48041	2.19153	0.566	1.13194	2.16593	2.11341	1.11499	1.07957
	0.834946	0.825427	0.565265	0.54483					943	Abcb8	3663.48	4380.6	4832.19			1.19575	1.31902			0.257914	0.399462									Idh3g	16152.8	28813.2	28623.7	4728.29	6996.26	6897.86	1.78379	1.77206	0.834946	0.825427	1.47966	1.45885	0.565265	0.54483
	1.58034	1.84562	0.818763	0.852491					944	Abcc1	15139.2	20356.9	32034.2			1.34465	2.11597			0.427228	1.08132									Ndufa4	7219.58	21589.5	25947.8	3817.85	6734.28	6893.57	2.99041	3.59408	1.58034	1.84562	1.76389	1.80562	0.818763	0.852491
	0.615056	0.812375	0.587586	0.077776					945	Abcc10	15216.5	22006.1	27537			1.4462	1.80968			0.532263	0.855733									Btg2	28152.5	43118.9	49438.6	6527.7	9809.37	6889.27	1.53162	1.7561	0.615056	0.812375	1.50273	1.05539	0.587586	0.0777764
	0.824252	1.08973	0.680042	1.06079					946	Abcc3	3203.93	3556.02	5974.73			1.10989	1.86481			0.150421	0.899031									Cul7	19644.5	34782.8	41810.2	3302.5	5291.22	6889.27	1.77062	2.12834	0.824252	1.08973	1.60219	2.08608	0.680042	1.06079
	0.631455	0.655345	0.681039	0.770215					947	Abcc4	17604.4	19227.4	25767.4			1.09219	1.46369			0.127226	0.549605									Herpud2	24940	38635.2	39280.3	4036.87	6472.29	6884.98	1.54913	1.57499	0.631455	0.655345	1.60329	1.70552	0.681039	0.770215
	0.755286	1.29078	0.962889	1.06553					948	Abcc5	11673.3	17780.1	24865.3			1.52314	2.1301			0.60705	1.09092									Nudcd2	14288.9	24119.1	34959.2	3289.62	6412.16	6884.98	1.68797	2.44661	0.755286	1.29078	1.94921	2.09294	0.962889	1.06553
	1.02454	0.94113	1.00344	0.571692					949	Abcc8	5385.7	5342.62	15252.5			0.992001	2.83204			-0.0115865	1.50184									1700030C10Rik	15749.1	32038.5	30238.7	4629.51	9281.1	6880.68	2.03431	1.92003	1.02454	0.94113	2.00477	1.48627	1.00344	0.571692
	0.719816	0.875855	0.600155	0.53079					950	Abcd1	7481.57	21245.9	19689.5			2.83977	2.63174			1.50577	1.39602									5830417I10Rik	21487	35388.4	39430.6	4762.64	7219.59	6880.68	1.64697	1.8351	0.719816	0.875855	1.51588	1.44472	0.600155	0.53079
	0.276517	-0.214209	0.090248	0.713619					951	Abcd3	16681.1	30548.3	35191.2			1.83131	2.10965			0.87288	1.077									4931408C20Rik	4105.84	4973.27	3539.31	4195.76	4466.61	6880.68	1.21127	0.862018	0.276517	-0.214209	1.06455	1.63991	0.0902481	0.713619
	0.667881	0.718812	0.650036	0.117455					952	Abcd4	17080.5	38149.9	35766.8			2.23354	2.09401			1.15933	1.06627									Chrac1	34057.9	54109.1	56053.3	6338.74	9946.8	6876.39	1.58874	1.64583	0.667881	0.718812	1.56921	1.08482	0.650036	0.117455
	0.23319	0.821433	0.366431	0.280798					953	Abce1	17698.9	36947.4	32631.2			2.08755	1.84368			1.06181	0.88259									Rnf138	24991.5	29375.8	44164	5660.2	7296.9	6876.39	1.17543	1.76716	0.23319	0.821433	1.28916	1.21487	0.366431	0.280798
	0.832422	0.814869	0.429122	0.032084					954	Abcf1	18008.2	32588.3	34727.3			1.80964	1.92842			0.855702	0.94742									B230219D22Rik	23874.9	42513.3	41999.2	6720.95	9049.18	6872.09	1.78067	1.75914	0.832422	0.814869	1.34641	1.02249	0.429122	0.0320838
	0.686453	0.859398	0.911883	0.827048					955	Abcf2	19206.4	28864.7	35113.9			1.50287	1.82824			0.58772	0.870454									Nmd3	19635.9	31600.5	35625	3873.67	7288.31	6872.09	1.60932	1.81428	0.686453	0.859398	1.8815	1.77405	0.911883	0.827048
	1.21414	1.41579	0.868041	1.1402					956	Abcf3	9010.52	17582.5	18353.7			1.95133	2.03692			0.964461	1.02639									Polr2f	13069.1	30320.7	34869.1	3117.84	5690.63	6872.09	2.32002	2.66805	1.21414	1.41579	1.82518	2.20412	0.868041	1.1402
	0.695647	0.667284	0.673947	0.269177					957	Abcg1	11527.3	17647	25625.6			1.53089	2.22304			0.614368	1.15253									Rg9mtd1	24085.3	39008.8	38249.4	5698.85	9092.13	6867.8	1.61961	1.58808	0.695647	0.667284	1.59543	1.20512	0.673947	0.269177
	1.02391	1.4273	1.32472	1.09817					958	Abhd1	9968.26	21632.5	29044.7			2.17013	2.91371			1.11778	1.54286									Fam134c	18347.5	37308.1	49344.1	3208.02	8035.61	6867.8	2.03342	2.68943	1.02391	1.4273	2.50485	2.14082	1.32472	1.09816
	0.746675	1.15555	0.593945	0.802352					959	Abhd10	20305.9	30698.6	30307.5			1.51181	1.49255			0.596274	0.577776									Phtf1	17617.3	29560.5	39245.9	3938.09	5944.03	6867.8	1.67792	2.22769	0.746675	1.15555	1.50937	1.74394	0.593945	0.802352
	0.83649	0.931336	0.826352	0.463561					960	Abhd11	17780.5	28843.3	37669.6			1.62218	2.11859			0.697936	1.0831									Gon4l	20606.5	36797.1	39297.5	4977.37	8825.85	6863.5	1.7857	1.90704	0.83649	0.931336	1.7732	1.37894	0.826352	0.463561
	1.13961	1.35644	0.58597	0.606051					961	Abhd12	22865.6	40542.1	47454.2			1.77306	2.07535			0.826241	1.05336									Kdsr	15255.2	33610.4	39061.2	4509.27	6768.63	6863.5	2.20321	2.56052	1.13961	1.35644	1.50105	1.52209	0.58597	0.606051
	0.771766	1.04629	0.833188	0.885668					962	Abhd13	14920.2	27980	22288.2			1.87531	1.49383			0.907132	0.579014									Trp53	17643.1	30123.1	36436.8	3714.78	6618.32	6863.5	1.70736	2.06522	0.771766	1.04629	1.78162	1.84762	0.833188	0.885668
	0.63132	0.76874	0.840428	1.00379					963	Abhd14a	10354.8	24278	22563.1			2.34461	2.179			1.22935	1.12366									Ei24	22560.7	34946.1	38438.4	3422.75	6128.71	6863.5	1.54898	1.70378	0.63132	0.76874	1.79058	2.00526	0.840428	1.00379
	0.800071	0.992236	0.436009	0.658331					964	Abhd15	4891.79	9512.78	9131.76			1.94464	1.86675			0.959505	0.90053									Slc29a2	17260.9	30054.4	34336.4	4346.07	5879.61	6859.21	1.74119	1.98927	0.800071	0.992236	1.35286	1.57826	0.436009	0.658331
	0.809725	0.863494	1.43082	1.1032					965	Abhd16a	15478.5	24789.1	27713.1			1.60151	1.79043			0.679437	0.840303									Tuba4a	21693.1	38025.4	39469.3	3190.84	8602.52	6854.91	1.75288	1.81944	0.809725	0.863494	2.696	2.14831	1.43082	1.1032
	0.863343	1.42467	1.10302	1.1149					966	Abhd2	15250.9	29251.3	28701			1.918	1.88192			0.939606	0.912209									Cep68	15804.9	28753.1	42428.7	3165.08	6798.7	6854.91	1.81925	2.68453	0.863343	1.42467	2.14803	2.16579	1.10302	1.1149
	0.856569	0.904136	0.893698	0.57747					967	Abhd3	4453.72	7769.13	12267.3			1.74441	2.7544			0.802742	1.46174									Pcmtd1	23445.4	42453.2	43876.2	4590.86	8529.51	6850.62	1.81073	1.87142	0.856569	0.904136	1.85793	1.49223	0.893698	0.57747
	1.06532	1.28921	1.04584	1.0396					968	Abhd4	11338.3	19626.8	22455.7			1.73102	1.98052			0.791621	0.985876									Nmt2	16775.5	35105	40998.4	3332.56	6880.3	6850.62	2.09263	2.44394	1.06531	1.28921	2.06457	2.05566	1.04584	1.0396
	1.03467	0.980526	0.165943	0.4325					969	Abhd5	17114.8	29453.1	37038.2			1.72091	2.1641			0.783173	1.11376									Cct2	17638.8	36135.7	34804.6	5076.15	5694.93	6850.62	2.04865	1.97319	1.03467	0.980526	1.1219	1.34957	0.165943	0.4325
	1.04997	1.11691	0.45647	1.12579					970	Abhd6	5411.47	13163.3	9977.93			2.43248	1.84385			1.28243	0.88272									Cebpz	8585.33	17775.8	18620	3139.31	4307.7	6850.62	2.07049	2.16882	1.04997	1.11691	1.37218	2.18221	0.45647	1.12579
	1.01433	1.10138	0.249538	-0.2556					971	Abhd8	10148.6	19880.2	21300.3			1.9589	2.09883			0.970045	1.06958									Klf7	19528.5	39446.9	41900.4	8168.21	9710.58	6842.03	2.01996	2.1456	1.01433	1.10138	1.18883	0.837641	0.249538	-0.255596
	0.762055	0.953833	0.358983	-0.05665					972	Abi1	19790.5	37303.8	40371.3			1.88494	2.03993			0.914516	1.02852									Ppan	21611.5	36651.1	41861.8	7116.05	9126.49	6842.03	1.6959	1.93701	0.762055	0.953833	1.28252	0.961493	0.358983	-0.0566522
	0.855629	0.826462	-0.28929	0.276858					973	Abi2	9315.45	17664.1	22936.8			1.89622	2.46223			0.923126	1.29996									Iws1	17909.4	32407.9	31759.3	5647.32	4621.22	6842.03	1.80955	1.77333	0.855629	0.826462	0.818303	1.21155	-0.289293	0.276858
	0.74129	0.552121	0.728239	0.015662					974	Abi3	5591.85	5432.81	14741.4			0.971559	2.63623			-0.0416271	1.39847									Prmt7	32352.8	54083.3	47437	6763.9	11205.2	6837.73	1.67167	1.46624	0.74129	0.552121	1.65662	1.01092	0.728239	0.0156621
	0.402327	0.609338	0.446772	0.108345					975	Abl2	17394	28456.8	35831.2			1.63601	2.05997			0.710181	1.04263									Chmp1a	22831.2	30174.6	34830.4	6343.03	8645.47	6837.73	1.32164	1.52556	0.402327	0.609338	1.36299	1.07799	0.446772	0.108345
	0.595224	0.822102	0.200879	0.337829					976	Ablim2	6824.46	13227.7	18671.6			1.93828	2.73598			0.954777	1.45206									Orc5	21787.6	32914.7	38520	5406.83	6214.6	6833.44	1.51071	1.76798	0.595224	0.822102	1.1494	1.26385	0.200879	0.337829
	0.954526	1.00594	0.685606	0.952899					977	Abr	3410.08	7524.33	10918.6			2.2065	3.20186			1.14176	1.67891									Hic2	20293	39326.7	40753.6	3530.11	5677.75	6833.44	1.93794	2.00826	0.954526	1.00594	1.60838	1.93576	0.685606	0.952899
	0.456343	0.712041	1.07748	0.365859					978	Abt1	9178.02	14507.5	17597.8			1.58068	1.91738			0.660547	0.939136									Ccdc101	35088.6	48143.7	57479.4	5299.46	11183.7	6829.14	1.37206	1.63812	0.456343	0.712041	2.11035	1.28865	1.07748	0.365859
	0.802912	1.12299	0.032951	0.106601					979	Abtb1	4118.73	11011.6	16008.5			2.67355	3.88675			1.41876	1.95857									Lrsam1	14280.3	24913.6	31102.1	6338.74	6485.18	6824.85	1.74462	2.17798	0.802912	1.12299	1.0231	1.07669	0.0329505	0.106601
	1.16511	1.46181	0.174281	0.94408					980	Abtb2	8306.17	12106.8	22588.9			1.45757	2.71953			0.543561	1.44336									5330430P22Rik	9366.99	21005.4	25801.7	3547.29	4002.77	6824.85	2.2425	2.75454	1.1651	1.46181	1.1284	1.92396	0.174281	0.94408
	0.61029	0.497966	0.70563	-0.05683					981	AC027184.1	7129.39	11754.6	16141.6			1.64876	2.2641			0.721377	1.17894									Bag4	30673.6	46825.2	43317.9	7094.58	11570.2	6820.55	1.52657	1.41222	0.61029	0.497966	1.63086	0.961375	0.70563	-0.0568292
	0.906185	0.935357	0.067276	-0.28122					982	AC175035.1	6261.84	13429.6	13744.9			2.14467	2.19502			1.10075	1.13424									Rpl22	16036.8	30054.4	30668.3	8288.46	8684.12	6820.55	1.87408	1.91236	0.906185	0.935357	1.04774	0.822897	0.0672756	-0.281216
	0.830418	1.22859	0.576312	0.262482					983	AC188461.4	6193.12	12171.2	13135			1.96528	2.12089			0.974734	1.08467									Slc25a3	21478.4	38192.8	50332	5685.97	8477.97	6820.55	1.7782	2.34338	0.830418	1.22859	1.49103	1.19954	0.576312	0.262482
	0.854526	0.966816	0.714386	0.843634					984	Acaa1a	5132.3	5501.52	7121.57			1.07194	1.3876			0.100225	0.47259									Vps37b	17578.7	31785.2	34357.9	3800.67	6236.08	6820.55	1.80816	1.95452	0.854526	0.966816	1.64078	1.79457	0.714386	0.843634
	0.99943	1.4227	0.50829	0.808209					985	Acaa1b	6120.11	6377.64	11429.7			1.04208	1.86757			0.0594651	0.901162									Aspscr1	17385.4	34757.1	46608	3895.15	5540.32	6820.55	1.99921	2.68087	0.99943	1.4227	1.42236	1.75104	0.50829	0.808209
	0.750784	0.877362	1.35138	0.764982					986	Acaa2	5252.56	14271.3	13886.6			2.71702	2.64378			1.44203	1.4026									Gm7008	19318.1	32506.7	35487.6	4011.1	10234.5	6816.26	1.68271	1.83701	0.750784	0.877362	2.55156	1.69935	1.35138	0.764982
	1.06112	0.873806	0.857589	0.629445					987	Acaca	13996.8	25029.6	30002.5			1.78824	2.14353			0.838536	1.09999									Tnfrsf9	17209.3	35908.1	31535.9	4406.2	7984.07	6816.26	2.08655	1.83249	1.06112	0.873806	1.81201	1.54697	0.857589	0.629445
	0.715609	0.976914	1.00647	0.813679					988	Acad10	16002.5	31162.4	30642.5			1.94735	1.91486			0.961511	0.937239									Polr1c	18678.2	30672.8	36763.3	3877.97	7790.8	6816.26	1.64218	1.96825	0.715609	0.976914	2.00899	1.75769	1.00647	0.813679
	1.05639	1.28612	0.456537	0.474915					989	Acad12	11681.9	16869.6	19977.3			1.44408	1.71011			0.530153	0.774089									Pdia6	16152.8	33593.2	39392	4904.36	6729.98	6816.26	2.07971	2.43871	1.05639	1.28612	1.37224	1.38984	0.456537	0.474915
	0.903538	1.07064	0.532707	0.821688					990	Acad8	11428.5	17982	17842.6			1.57343	1.56124			0.653913	0.642688									Zyg11b	18699.6	34980.4	39276	3856.5	5578.97	6816.26	1.87065	2.10036	0.903538	1.07064	1.44664	1.76747	0.532707	0.821688
	0.964293	1.18756	0.237606	0.781817					991	Acad9	9178.02	18136.6	22777.8			1.97609	2.48178			0.982646	1.31138									Mettl11a	13189.4	25733.9	30041.2	3959.57	4668.47	6807.67	1.95111	2.27768	0.964293	1.18756	1.17903	1.7193	0.237606	0.781817
	0.596311	1.03932	0.668249	0.854742					992	Acadl	7009.14	8486.35	17417.3			1.21075	2.48495			0.275907	1.31321									Nrtn	17711.8	26777.5	36402.5	3762.02	5978.39	6803.37	1.51185	2.05526	0.596311	1.03932	1.58914	1.80844	0.668249	0.854742
	0.856674	0.716396	0.283154	0.1693					993	Acadm	18519.2	37239.4	40663.4			2.01085	2.19574			1.00781	1.13471									Ppp2r5a	24029.5	43514	39482.2	6042.42	7352.73	6794.78	1.81086	1.64307	0.856674	0.716396	1.21685	1.12451	0.283154	0.1693
	0.542848	0.70372	0.506039	0.451535					994	Acads	16462	27520.5	32137.2			1.67176	1.95221			0.741365	0.965105									Gls	25747.4	37510	41934.8	4968.78	7056.39	6794.78	1.45685	1.6287	0.542848	0.70372	1.42015	1.36749	0.506039	0.451535
	0.518334	0.604851	0.752893	0.276963					995	Acadsb	10161.5	19309	21171.4			1.90021	2.08349			0.926157	1.059									1300017J02Rik	28689.4	41091.8	43631.4	5604.37	9444.31	6790.49	1.4323	1.52082	0.518334	0.604851	1.68517	1.21164	0.752893	0.276963
	0.904397	1.06807	0.772308	0.753352					996	Acadvl	9440	15795.9	22223.8			1.6733	2.35421			0.742695	1.23524									Rnf146	17153.5	32107.2	35964.3	4028.28	6880.3	6790.49	1.87176	2.09662	0.904397	1.06807	1.708	1.6857	0.772308	0.753352
	1.01593	1.03828	0.432398	0.367317					997	Acap2	17402.6	33382.8	43786			1.91827	2.51606			0.939802	1.33117									Alg6	16599.5	33567.4	34091.6	5260.81	7099.33	6786.19	2.0222	2.05378	1.01593	1.03828	1.34947	1.28995	0.432398	0.367317
	0.574682	0.966231	1.00728	0.980223					998	Acap3	4754.36	5815.04	7503.85			1.2231	1.57831			0.290538	0.65838									Slc25a30	19219.3	28624.2	37549.3	3439.93	6914.66	6786.19	1.48935	1.95373	0.574682	0.966231	2.01012	1.97277	1.00728	0.980223
	0.61571	0.72713	0.086661	0.15025					999	Acat1	3723.6	9504.19	8315.65			2.55242	2.23323			1.35187	1.15913									Dnaja1	18918.7	28989.3	31316.9	6111.13	6489.47	6781.9	1.53231	1.65534	0.61571	0.72713	1.06191	1.10976	0.0866615	0.15025
	0.604281	0.442452	1.50726	0.828014					1000	Acat2	20172.7	46365.7	48278.9			2.29843	2.39327			1.20065	1.25899									Gm20388	22685.2	34486.5	30827.2	3817.85	10853	6777.6	1.52022	1.35891	0.604281	0.442452	2.8427	1.77524	1.50726	0.828014
	0.708173	0.824633	0.880098	0.445391					1001	Acbd3	16642.4	26292.2	27876.3			1.57983	1.67502			0.659771	0.744177									Zfp106	22457.6	36689.7	39774.3	4977.37	9160.85	6777.6	1.63373	1.77108	0.708173	0.824633	1.8405	1.36168	0.880098	0.445391
	0.647908	0.756478	0.057651	0.147309					1002	Acbd4	9916.73	18986.9	28632.3			1.91463	2.88727			0.937069	1.52971									Gm6297	17741.9	27799.7	29972.4	6119.72	6369.22	6777.6	1.56689	1.68936	0.647908	0.756478	1.04077	1.1075	0.0576511	0.147309
	0.054079	-0.344763	0.76868	0.154518					1003	Acbd5	7717.78	15924.8	18594.2			2.06339	2.40927			1.04502	1.2686									Gm7349	6180.24	6416.3	4866.55	6085.36	10367.7	6773.31	1.0382	0.787437	0.0540787	-0.344763	1.70371	1.11305	0.76868	0.154518
	0.874804	0.884207	0.491623	0.300088					1004	Acbd6	12566.6	21469.2	17821.1			1.70843	1.41813			0.772674	0.503989									Cdc42	27418.1	50278.2	50606.9	5501.3	7734.97	6773.31	1.83376	1.84575	0.874804	0.884207	1.40603	1.23122	0.491623	0.300088
	0.649805	0.620089	0.599179	0.784599					1005	Acbd7	5527.43	10337.4	16369.3			1.87019	2.96147			0.903188	1.56631									Sugp2	18145.6	28469.6	27889.2	3929.5	5952.62	6769.01	1.56896	1.53697	0.649805	0.620089	1.51485	1.72261	0.599179	0.784599
	0.394083	0.877628	0.150976	0.154726					1006	Accs	6949.01	14692.2	11348.1			2.11429	1.63306			1.08017	0.707574									Plp2	23419.6	30775.9	43030.1	6076.77	6747.16	6764.72	1.31411	1.83735	0.394083	0.877628	1.11032	1.11321	0.150976	0.154726
	1.20766	1.40768	0.503526	0.528553					1007	Accsl	3715.01	5312.56	5747.08			1.43003	1.54699			0.516041	0.629463									Arpc4	12717	29371.5	33739.4	4689.64	6648.38	6764.72	2.30964	2.6531	1.20767	1.40768	1.41767	1.44248	0.503526	0.528553
	1.13862	1.3595	0.697413	0.943591					1008	Acd	16032.5	29818.2	28744			1.85985	1.79285			0.895189	0.842257									Nek2	13666.1	30088.7	35066.6	3517.23	5703.52	6764.72	2.20171	2.56596	1.13862	1.3595	1.62159	1.92331	0.697413	0.943591
	1.11462	1.57081	0.720278	0.577366					1009	Ace	3285.53	5797.86	10192.7			1.76467	3.1023			0.819394	1.63334									Cops3	15083.4	32661.3	44808.3	4530.74	7464.39	6760.42	2.16538	2.97071	1.11462	1.57081	1.6475	1.49212	0.720278	0.577366
	0.756057	0.960336	0.550799	0.506651					1010	Acer2	16389	24067.5	31703.4			1.46852	1.93443			0.554361	0.95191									Amacr	23428.2	39567.2	45585.8	4758.35	6970.49	6760.42	1.68887	1.94576	0.756057	0.960336	1.4649	1.42075	0.550799	0.506651
	0.883379	1.21286	0.37515	0.754659					1011	Acin1	11067.7	21976	18654.4			1.98559	1.68547			0.98957	0.753154									Zfp599	13747.7	25360.3	31866.7	4006.81	5196.73	6760.42	1.84469	2.31796	0.883379	1.21286	1.29697	1.68723	0.37515	0.754659
	0.515922	0.512682	0.666092	-0.06877					1012	Acly	28229.8	47538.1	62741.1			1.68397	2.22251			0.751866	1.15219									Zc3h10	29088.8	41594.3	41501	7085.99	11243.8	6756.13	1.42991	1.4267	0.515922	0.512682	1.58677	0.953449	0.666092	-0.0687723
	1.25229	1.18339	1.37451	0.687265					1013	Acn9	9641.86	19515.2	21712.6			2.024	2.25191			1.01721	1.17115									Mob1a	19313.8	46009.2	43863.4	4195.76	10878.8	6756.13	2.3822	2.27109	1.25229	1.18339	2.5928	1.61023	1.37451	0.687265
	0.974433	1.11301	1.15469	0.733783					1014	Aco1	18351.7	29680.7	42725.1			1.61733	2.32812			0.69361	1.21917									Opa3	17260.9	33915.3	37334.5	4062.63	9044.89	6756.13	1.96487	2.16296	0.974433	1.11301	2.22636	1.66299	1.15469	0.733783
	1.06158	1.32696	0.687433	0.697638					1015	Aco2	11737.7	24119.1	21437.7			2.05483	1.82639			1.03902	0.868998									Rps6kb1	16732.6	34924.6	41977.7	4165.7	6708.51	6756.13	2.08722	2.50874	1.06158	1.32696	1.61042	1.62185	0.687433	0.697638
	0.649205	0.887305	1.17892	1.06014					1016	Acot1	7717.78	8473.46	14702.7			1.09791	1.90505			0.134765	0.929826									6030458C11Rik	16496.4	25871.3	30513.6	3238.08	7331.26	6751.83	1.5683	1.84972	0.649205	0.887305	2.26408	2.08513	1.17892	1.06014
	1.04528	1.07951	0.559249	1.06397					1017	Acot13	14443.5	28315	23035.6			1.9604	1.59488			0.971151	0.673446									Ube2h	12987.5	26803.3	27446.8	3229.49	4758.66	6751.83	2.06377	2.11332	1.04528	1.07951	1.4735	2.09068	0.559249	1.06397
	0.496063	-0.531509	-0.31797	-0.31605					1018	Acot2	6008.45	13128.9	12138.5			2.18508	2.02023			1.12768	1.01452									Gm13230	7189.52	10139.8	4973.93	8400.12	6738.57	6747.54	1.41036	0.691831	0.496063	-0.531509	0.802199	0.803267	-0.317967	-0.316048
	-1.14917	0.0933208	-0.22244	-0.12551					1019	Acot4	4964.81	8022.52	7327.74			1.61588	1.47594			0.692317	0.56163									A530040E14Rik	6953.3	3135.14	7417.94	7360.84	6309.09	6747.54	0.450885	1.06682	-1.14917	0.0933208	0.857115	0.916681	-0.222438	-0.125509
	1.01583	0.913433	0.827344	0.37117					1020	Acot6	3216.82	3736.4	3174.21			1.16152	0.986754			0.216014	-0.0192376									Tbc1d13	21164.8	42796.8	39864.5	5213.57	9251.04	6743.24	2.02207	1.88352	1.01583	0.913433	1.77442	1.2934	0.827344	0.37117
	1.0081	0.798905	0.455221	0.039344					1021	Acot7	15706.1	29152.5	36634.4			1.85612	2.33249			0.89229	1.22187									Itfg1	26207	52709	45594.3	6553.47	8984.76	6734.65	2.01126	1.73978	1.0081	0.798905	1.37099	1.02765	0.455221	0.039344
	0.847925	1.30085	0.34205	0.54745					1022	Acot8	17351	28186.2	34890.5			1.62447	2.01086			0.699965	1.00781									Fam83d	18635.2	33541.7	45912.2	4608.04	5840.95	6734.65	1.79991	2.46374	0.847925	1.30085	1.26756	1.4615	0.34205	0.54745
	0.645139	0.87298	0.172138	0.567761					1023	Acot9	13850.8	22547.2	24753.7			1.62787	1.78717			0.702983	0.837676									Fxn	23312.2	36457.8	42695	4543.62	5119.42	6734.65	1.56389	1.83144	0.645139	0.87298	1.12673	1.48222	0.172138	0.567761
	0.843471	0.920388	0.03094	0.623362					1024	Acox1	10341.9	19579.6	32175.9			1.89323	3.11122			0.920847	1.63748									Brf1	17965.2	32236.1	34001.4	4371.84	4466.61	6734.65	1.79436	1.89262	0.843471	0.920388	1.02168	1.54046	0.0309397	0.623362
	0.805737	1.35924	0.36245	1.08546					1025	Acox3	7039.2	16367.1	12310.3			2.32514	1.74882			1.21732	0.806378									Aatf	13434.2	23483.5	34465.3	3173.66	4080.08	6734.65	1.74804	2.56549	0.805737	1.35924	1.28561	2.12205	0.36245	1.08546
	0.674266	0.536401	1.35373	0.611149					1026	Acp1	11153.6	26111.8	20385.4			2.34111	1.82769			1.22719	0.870022									Zfp866	23239.2	37084.8	33705	4406.2	11261	6730.36	1.59578	1.45035	0.674266	0.536401	2.55572	1.52747	1.35373	0.611149
	0.897748	0.971212	0.425288	0.514617					1027	Acp2	7090.74	13025.9	12769.9			1.83702	1.80092			0.877369	0.848735									Gtf2a2	19245.1	35856.5	37729.7	4711.11	6326.27	6730.36	1.86316	1.96049	0.897748	0.971212	1.34284	1.42861	0.425288	0.514617
	1.03426	1.10875	0.548716	0.847437					1028	Acp6	12455	22019	24594.8			1.76789	1.9747			0.822027	0.98163									Romo1	14641	29985.7	31574.6	3740.54	5471.6	6730.36	2.04806	2.15658	1.03426	1.10875	1.46278	1.7993	0.548716	0.847437
	0.598108	0.682893	0.879197	0.2079					1029	Acrbp	6609.72	14507.5	16292			2.19488	2.46485			1.13414	1.3015									Elf1	23866.3	36127.1	38313.9	5823.4	10711.3	6726.06	1.51373	1.60536	0.598108	0.682893	1.83935	1.15501	0.879197	0.2079
	0.908417	0.97799	0.761033	0.496698					1030	Acsf2	8104.31	19068.5	26175.4			2.35289	3.22981			1.23443	1.69145									Prpf38b	17183.5	32253.3	33846.8	4766.94	8078.55	6726.06	1.87699	1.96972	0.908417	0.97799	1.6947	1.41098	0.761033	0.496698
	0.802746	0.867772	0.508914	0.640063					1031	Acsf3	6871.7	14906.9	12529.3			2.16932	1.82332			1.11725	0.866569									Cacybp	20353.1	35504.4	37141.2	4316.01	6141.59	6726.06	1.74442	1.82484	0.802746	0.867772	1.42298	1.5584	0.508914	0.640063
	1.4073	1.4749	0.310569	0.593921					1032	Acsl1	14731.2	33923.9	31540.2			2.30286	2.14105			1.20343	1.09832									Ewsr1	9478.66	25141.2	26347.2	4453.44	5523.14	6721.77	2.6524	2.77964	1.4073	1.4749	1.2402	1.50934	0.310569	0.593921
	0.667684	0.646316	0.256242	-0.16194					1033	Acsl3	25107.5	48869.5	54180.6			1.94641	2.15795			0.960817	1.10966									Gpx1	26430.3	41985.1	41367.8	7515.44	8976.17	6717.47	1.58852	1.56517	0.667684	0.646316	1.19436	0.893823	0.256242	-0.16194
	0.741714	1.0818	1.07426	0.811919					1034	Acsl4	4840.26	10157	15969.8			2.09844	3.29938			1.06932	1.72219									Gm12359	21723.2	36324.7	45980.9	3826.43	8057.08	6717.47	1.67216	2.11668	0.741714	1.0818	2.10564	1.75554	1.07426	0.811919
	0.779509	1.44355	0.873254	1.15701					1035	Acsl6	3014.96	3684.86	7465.19			1.22219	2.47605			0.289471	1.30804									Bcas3	15714.7	26975.1	42742.3	3010.47	5514.55	6713.18	1.71655	2.71989	0.779509	1.44355	1.83179	2.22994	0.873254	1.15701
	0.849376	0.841629	0.366894	-0.0938					1036	Acss1	5819.47	18463	13173.6			3.17262	2.26371			1.66567	1.17869									Rraga	24330.1	43836.1	43601.3	7150.41	9220.98	6700.29	1.80172	1.79207	0.849376	0.841629	1.28957	0.93705	0.366894	-0.0938024
	1.18268	1.37436	0.642089	0.440416					1037	Acss2	6738.56	18866.7	17954.2			2.79981	2.6644			1.48533	1.41381									Trim25	12755.6	28954.9	33069.3	4934.43	7700.61	6696	2.26998	2.59253	1.18268	1.37436	1.56059	1.357	0.642089	0.440416
	0.740046	0.816931	0.535789	0.487639					1038	Actb	43343.3	52799.2	56766.4			1.21816	1.30969			0.284707	0.389228									Seh1l	24630.8	41139	43390.9	4775.53	6923.25	6696	1.67023	1.76165	0.740046	0.816931	1.44973	1.40215	0.535789	0.487639
	0.862461	0.858658	0.540762	-0.78774					1039	Actg1	30596.3	50054.8	56323.9			1.63598	1.84088			0.710154	0.880393									Apol7d	18802.7	34185.9	34095.9	11552.3	16805.6	6691.7	1.81814	1.81335	0.862461	0.858658	1.45474	0.579252	0.540762	-0.787737
	0.6194	0.67436	0.959813	0.445783					1040	Actl6a	11067.7	21207.3	23344.8			1.91613	2.10927			0.938199	1.07674									Timeless	26877	41289.3	42892.6	4912.95	9555.97	6691.7	1.53624	1.59589	0.6194	0.67436	1.94506	1.36205	0.959813	0.445783
	0.477305	0.597723	0.804086	0.579132					1041	Actn1	21920.7	36127.1	36836.3			1.64808	1.68043			0.720786	0.748832									Pank2	29853.2	41559.9	45177.7	4479.2	7820.86	6691.7	1.39214	1.51333	0.477305	0.597723	1.74604	1.49395	0.804086	0.579132
	0.360712	0.466171	0.639601	0.515541					1042	Actn2	8709.88	14529	30818.6			1.66811	3.53835			0.738211	1.82308									Ndufa2	21164.8	27176.9	29237.9	4681.05	7292.6	6691.7	1.28406	1.38144	0.360712	0.466171	1.5579	1.42953	0.639601	0.515541
	0.586575	0.413434	0.541458	0.612714					1043	Actn4	28186.9	47744.3	48691.2			1.69385	1.72744			0.760305	0.788639									Sap30	23797.6	35736.3	31694.8	4376.14	6369.22	6691.7	1.50168	1.33185	0.586575	0.413434	1.45544	1.52913	0.541458	0.612714
	0.642347	1.01058	1.42625	0.732824					1044	Actr10	10483.6	25231.4	21399.1			2.40674	2.04119			1.26708	1.02941									Gsg2	22212.8	34671.2	44752.5	4023.98	10814.4	6687.41	1.56087	2.01472	0.642347	1.01058	2.68748	1.66189	1.42625	0.732824
	0.602695	0.922134	0.740706	0.213484					1045	Actr1a	7271.12	16040.7	15862.5			2.20609	2.18157			1.14149	1.12537									2700038G22Rik	18600.8	28246.3	35247	5767.57	9637.57	6687.41	1.51855	1.89492	0.602695	0.922134	1.67099	1.15948	0.740706	0.213484
	1.10767	1.19532	0.507054	0.226589					1046	Actr2	10758.5	25506.3	33193.9			2.3708	3.08536			1.24537	1.62544									Mkrn2	20280.1	43703	46440.5	5711.74	8117.21	6683.11	2.15497	2.28995	1.10767	1.19532	1.42114	1.17007	0.507054	0.226589
	0.644752	0.529268	0.469723	0.480973					1047	Actr3	8413.54	10208.5	11159.1			1.21334	1.32633			0.278989	0.40744									Gm9887	18360.3	28705.8	26497.6	4788.41	6631.2	6683.11	1.56347	1.4432	0.644752	0.529268	1.38484	1.39568	0.469723	0.480973
	1.07256	1.39299	0.568975	0.785892					1048	Actr3b	11733.4	23268.7	26673.7			1.98311	2.2733			0.987768	1.18479									2310033P09Rik	16062.6	33782.2	42183.9	3873.67	5746.47	6678.82	2.10316	2.62622	1.07256	1.39299	1.48347	1.72416	0.568975	0.785892
	0.770327	0.814163	0.447376	-0.07489					1049	Actr5	11995.4	22117.8	25595.5			1.84385	2.13378			0.882721	1.09341									Psmd5	23363.8	39850.6	41080	7030.16	9586.03	6674.52	1.70566	1.75828	0.770327	0.814163	1.36356	0.949412	0.447376	-0.0748934
	0.883223	0.403907	0.455639	0.201065					1050	Actr6	6820.17	12042.4	17941.4			1.7657	2.63063			0.82024	1.39541									Zfp600	11437.1	21095.6	15132.3	5806.22	7962.59	6674.52	1.84449	1.32309	0.883223	0.403907	1.37139	1.14955	0.455639	0.201065
	1.22931	1.38836	0.996723	0.858794					1051	Actr8	9001.93	17462.3	23572.5			1.93984	2.6186			0.955937	1.3888									Lrrc57	15877.9	37226.5	41565.4	3680.42	7344.14	6674.52	2.34455	2.61781	1.22931	1.38836	1.99546	1.81352	0.996723	0.858794
	0.572256	0.653874	0.143052	0.159001					1052	Acvr1	4247.57	7408.37	5046.95			1.74414	1.1882			0.802518	0.248774									Alg8	21937.9	32618.3	34516.8	5978	6601.14	6674.52	1.48685	1.57339	0.572256	0.653874	1.10424	1.11651	0.143052	0.159001
	0.720271	0.854231	0.909379	0.466592					1053	Acvr1b	10393.5	17831.6	20784.8			1.71566	1.9998			0.778764	0.999857									1110028C15Rik	27233.4	44866.8	49232.4	4827.06	9066.36	6670.23	1.64749	1.8078	0.720271	0.854231	1.87824	1.38184	0.909379	0.466592
	1.02191	1.06833	0.168355	0.202273					1054	Acvr2a	9581.73	15237.6	21648.2			1.59028	2.25932			0.66928	1.17589									Cenpf	13447.1	27305.8	28198.5	5797.63	6515.24	6670.23	2.03061	2.097	1.02191	1.06833	1.12378	1.15051	0.168355	0.202273
	1.12611	1.17782	0.349342	0.738379					1055	Acvr2b	4870.32	6059.84	6352.71			1.24424	1.30437			0.315263	0.383356									Fbxw2	15534.3	33906.7	35143.9	3998.22	5093.65	6670.23	2.1827	2.26234	1.12611	1.17782	1.27398	1.6683	0.349342	0.738379
	1.09526	1.25167	0.39418	0.930361					1056	Acy1	8052.78	12544.9	15085			1.55783	1.87327			0.639536	0.905557									Cdc7	14623.8	31244	34821.8	3500.05	4599.75	6670.23	2.13651	2.38117	1.09526	1.25167	1.3142	1.90575	0.39418	0.930361
	0.256625	0.606614	1.08308	0.627108					1057	Acy3	8323.35	17178.8	17249.8			2.06393	2.07246			1.0454	1.05135									Arih1	25652.9	30647	39061.2	4316.01	9143.67	6665.93	1.19468	1.52268	0.256625	0.606614	2.11855	1.54447	1.08308	0.627108
	0.844838	1.34019	0.290567	0.927663					1058	Acyp1	4097.25	5295.38	7091.5			1.29242	1.7308			0.370078	0.791435									Pank3	17209.3	30909	43571.3	3504.34	4286.23	6665.93	1.79606	2.53184	0.844838	1.34019	1.22312	1.90219	0.290567	0.927663
	0.463367	0.715391	1.09414	0.314911					1059	Acyp2	8134.38	9787.64	15338.4			1.20324	1.88563			0.266929	0.915047									2510046G10Rik	34706.4	47851.7	56985.4	5355.29	11432.8	6661.63	1.37876	1.64193	0.463367	0.715391	2.13486	1.24393	1.09414	0.314911
	1.00054	1.15958	0.685481	0.621875					1060	Ada	8688.41	10603.6	19393.2			1.22044	2.23207			0.287396	1.15838									Sqle	16062.6	32137.3	35882.7	4328.9	6961.9	6661.63	2.00075	2.23393	1.00054	1.15958	1.60824	1.53887	0.685481	0.621875
	0.700914	1.40118	-0.25894	0.844269					1061	Adal	30321.4	54529.9	57436.4			1.7984	1.89425			0.846712	0.92163									Heatr6	11218.1	18235.3	29628.8	3710.48	3100.86	6661.63	1.62553	2.64117	0.700914	1.40118	0.835703	1.79536	-0.258937	0.844269
	0.659236	0.919015	1.35841	1.07373					1062	Adam10	13747.7	28405.2	24126.6			2.06618	1.75495			1.04697	0.811432									Ssr3	14056.9	22199.3	26579.2	3160.78	8104.32	6653.04	1.57925	1.89082	0.659236	0.919015	2.56403	2.10487	1.35841	1.07373
	0.536187	0.805831	0.264214	-0.36291					1063	Adam15	14074.1	28761.7	23516.6			2.04359	1.67091			1.0311	0.740638									Odc1	29002.9	42058.1	50701.4	8550.43	10268.9	6648.75	1.45013	1.74815	0.536187	0.805831	1.20098	0.777592	0.264214	-0.362914
	0.957899	1.10502	1.18275	0.925708					1064	Adam17	15538.6	40262.9	33687.8			2.59115	2.16801			1.37359	1.11637									Gemin5	19653.1	38175.7	42274.1	3500.05	7945.41	6648.75	1.94248	2.15102	0.957899	1.10502	2.27008	1.89962	1.18275	0.925708
	0.794718	0.928479	0.928351	0.771404					1065	Adam22	8641.17	19669.8	23439.3			2.27629	2.71252			1.18668	1.43963									Gtf2b	22152.7	38429.1	42162.4	3895.15	7412.86	6648.75	1.73474	1.90327	0.794718	0.928479	1.9031	1.70693	0.928351	0.771404
	0.823327	1.29825	1.05489	0.998311					1066	Adam23	17690.3	10741.1	31548.8			0.607171	1.78339			-0.719824	0.834623									Pcyt2	17926.6	31720.7	44086.7	3328.27	6914.66	6648.75	1.76948	2.4593	0.823327	1.29825	2.07755	1.99766	1.05489	0.998311
	0.71925	0.708687	0.91374	0.861653					1067	Adam9	20353.1	36994.6	20724.7			1.81764	1.01826			0.862065	0.0261012									Ranbp2	19322.4	31810.9	31578.9	3658.95	6893.18	6648.75	1.64633	1.63432	0.71925	0.708687	1.88392	1.81712	0.91374	0.861653
	0.981576	1.15421	0.662818	0.712193					1068	Adamts1	4930.45	5303.97	24483.1			1.07576	4.96569			0.105353	2.31199									2610206C17Rik	16616.6	32811.6	36982.3	4058.34	6425.05	6648.75	1.97462	2.22562	0.981576	1.15421	1.58317	1.63829	0.662818	0.712193
	1.18173	1.039	1.42946	0.970618					1069	Adamts10	3599.05	4337.66	6232.45			1.20522	1.73169			0.269301	0.792183									1500001M20Rik	16681.1	37840.7	34276.3	3388.39	9126.49	6640.16	2.26848	2.0548	1.18173	1.039	2.69346	1.95968	1.42946	0.970618
	1.03833	1.18708	0.871897	0.972446					1070	Adamts14	5905.37	14919.8	13087.7			2.52648	2.21624			1.33713	1.14811									4930579G24Rik	15616	32072.9	35556.3	3384.1	6193.13	6640.16	2.05385	2.27692	1.03833	1.18708	1.83007	1.96216	0.871897	0.972446
	1.00484	1.11594	0.695313	0.426146					1071	Adamts15	4178.85	5535.88	7220.36			1.32474	1.72783			0.405707	0.788965									Bid	20301.6	40739.6	44000.8	4938.72	7996.95	6635.86	2.00672	2.16736	1.00484	1.11594	1.61924	1.34364	0.695313	0.426146
	0.673815	0.387737	0.637612	0.392667					1072	Adamts8	3410.08	6618.15	4338.23			1.94076	1.27218			0.956622	0.347301									RP23-406N5.8	13043.4	20807.9	17065.1	5054.67	7863.81	6635.86	1.59529	1.30834	0.673815	0.387737	1.55575	1.31282	0.637612	0.392667
	1.02621	1.17135	0.792872	0.614854					1073	Adamts9	9083.53	21692.6	33060.7			2.38812	3.63964			1.25588	1.86379									Cmtm6	13567.3	27632.2	30556.6	4333.19	7507.34	6635.86	2.03667	2.25222	1.02621	1.17135	1.73252	1.5314	0.792872	0.614854
	1.03293	1.14733	0.78184	0.928227					1074	Adamtsl5	3830.97	8155.65	6185.2			2.12887	1.61453			1.09009	0.691111									Elovl5	12077	24711.8	26751	3487.17	5995.57	6635.86	2.04618	2.21503	1.03293	1.14733	1.71932	1.90294	0.78184	0.928227
	0.87237	0.893947	0.156819	0.962387					1075	Adap1	4196.03	5806.45	4522.93			1.3838	1.07791			0.468631	0.108233									Hspb6	11467.1	20992.5	21308.9	3405.57	3796.62	6635.86	1.83067	1.85825	0.87237	0.893947	1.11483	1.94853	0.156819	0.962387
	0.737665	1.04477	0.239448	0.52251					1076	Adap2	8147.26	21387.7	28640.9			2.62513	3.5154			1.39239	1.81369									Ubxn2a	15177.9	25308.7	31312.6	4616.63	5450.12	6631.57	1.66748	2.06304	0.737665	1.04477	1.18054	1.43645	0.239448	0.52251
	0.992128	0.964106	1.7691	1.12409					1077	Adar	11050.6	20777.8	21076.9			1.88025	1.90732			0.910924	0.931545									Ap2a2	24974.3	49676.9	48721.3	3040.53	10363.4	6627.27	1.98912	1.95085	0.992128	0.964106	3.40842	2.17964	1.7691	1.12409
	0.929798	1.05192	0.657988	0.57628					1078	Adarb1	16393.3	30728.7	34680.1			1.87446	2.1155			0.906477	1.081									Glo1	13932.4	26541.3	28885.7	4444.85	7013.44	6627.27	1.90501	2.07328	0.929798	1.05192	1.57788	1.491	0.657988	0.57628
	0.860365	0.725827	0.10941	0.168696					1079	Adat1	21109	31226.8	28769.8			1.47931	1.36291			0.564927	0.446694									Nup62	15972.4	28997.9	26416	5892.11	6356.33	6622.98	1.8155	1.65385	0.860365	0.725827	1.07879	1.12404	0.10941	0.168696
	0.699965	1.00781	0.02042	0.364349					1080	Adat2	9822.24	18888.1	21987.5			1.923	2.23854			0.943356	1.16256									Acot8	17351	28186.2	34890.5	5144.86	5218.2	6622.98	1.62447	2.01086	0.699965	1.00781	1.01426	1.2873	0.0204204	0.364349
	0.799985	1.31407	0.357942	1.11098					1081	Adat3	13189.4	25905.7	27889.2			1.96413	2.11452			0.973892	1.08033									Med11	13189.4	22963.8	32794.4	3066.3	3929.76	6622.98	1.74108	2.48643	0.799985	1.31407	1.2816	2.15993	0.357942	1.11098
	0.754296	1.01687	0.875529	0.045825					1082	Adc	25197.7	41370.9	44649.4			1.64186	1.77196			0.715327	0.82535									Gm12762	20640.9	34817.2	41767.3	6411.75	11763.5	6618.68	1.68681	2.02352	0.754296	1.01687	1.83468	1.03227	0.875529	0.0458253
	1.24324	1.11012	0.813257	0.80029					1083	Adck1	4853.14	13077.4	12499.2			2.69462	2.5755			1.43008	1.36485									Slc25a32	17840.7	42234.2	38511.4	3800.67	6678.44	6618.68	2.3673	2.15863	1.24324	1.11012	1.75717	1.74145	0.813257	0.80029
	0.846147	0.640613	1.19073	0.457033					1084	Adck2	6661.26	13713	19900			2.05862	2.98742			1.04168	1.5789									Jagn1	18983.1	34125.8	29594.5	4818.47	10999	6614.39	1.79769	1.55899	0.846147	0.640613	2.28268	1.37272	1.19073	0.457033
	0.823464	0.884438	0.323169	0.028557					1085	Adck5	12515.1	23002.5	22855.2			1.83798	1.82621			0.87812	0.868851									Sac3d1	27916.3	49402.1	51534.7	6484.75	8112.91	6614.39	1.76965	1.84604	0.823464	0.884438	1.25108	1.01999	0.323169	0.0285572
	0.79843	0.898105	0.876876	0.955896					1086	Adcy3	8027.01	11097.5	14333.3			1.38252	1.78564			0.467304	0.83644									Tmem209	18678.2	32485.2	34808.9	3409.86	6261.85	6614.39	1.73921	1.86362	0.79843	0.898105	1.8364	1.93978	0.876876	0.955896
	0.982531	0.981975	1.00862	0.488603					1087	Adcy9	6480.87	18329.8	12327.4			2.8283	1.90213			1.49993	0.927614									Ahsa1	16805.6	33206.7	33193.9	4711.11	9478.66	6610.09	1.97593	1.97517	0.982531	0.981975	2.01198	1.40309	1.00862	0.488603
	1.01083	1.02464	0.742158	0.445844					1088	Adcyap1r1	6712.79	6248.8	15269.7			0.93088	2.27472			-0.103333	1.18569									Fbxl15	19322.4	38935.8	39310.4	4852.83	8117.21	6610.09	2.01507	2.03445	1.01083	1.02464	1.67268	1.36211	0.742158	0.445844
	0.565426	1.36392	0.630685	0.583731					1089	Add1	19966.6	42350.1	44786.8			2.12105	2.24309			1.08478	1.16549									Lrrc34	14714	21774.2	37871.4	4410.49	6828.76	6610.09	1.47982	2.57383	0.565426	1.36392	1.5483	1.49872	0.630685	0.583731
	0.978591	1.15128	-0.50905	-0.11595					1090	Adh5	15585.9	28684.4	33460.2			1.84041	2.14683			0.880025	1.10221									Gtf2h5	15478.5	30501	34379.4	7163.29	5033.53	6610.09	1.97054	2.2211	0.978591	1.15128	0.702684	0.922773	-0.509052	-0.115952
	0.841064	1.0017	0.031152	0.606383					1091	Adhfe1	4432.25	10105.5	10703.8			2.27998	2.41499			1.18902	1.27202									Tcf4	22010.9	39429.7	44073.8	4341.78	4436.55	6610.09	1.79137	2.00236	0.841064	1.0017	1.02183	1.52244	0.0311516	0.606383
	0.761227	1.20753	0.220513	0.880594					1092	Adi1	16152.8	27490.4	29405.5			1.7019	1.82046			0.767146	0.8643									Cdr2	17600.2	29831	40646.2	3590.23	4183.15	6610.09	1.69493	2.30942	0.761227	1.20753	1.16515	1.84113	0.220513	0.880594
	1.26536	1.19397	0.38918	0.365969					1093	Adipor1	20580.8	37823.5	39933.2			1.83781	1.94032			0.877988	0.956292									Pkmyt1	17235.1	41431.1	39430.6	5119.09	6704.21	6597.21	2.40388	2.28781	1.26536	1.19397	1.30965	1.28875	0.38918	0.365969
	0.833655	1.36776	1.1216	1.09837					1094	Adipor2	7687.72	15765.9	17838.3			2.05079	2.32036			1.03618	1.21435									Jmjd6	15620.2	27838.3	40311.2	3079.18	6699.92	6592.91	1.78219	2.5807	0.833655	1.36776	2.17588	2.14113	1.1216	1.09837
	1.351	1.45535	1.36834	0.636351					1095	Adk	18399	27340.1	37871.4			1.48596	2.05835			0.571394	1.04148									Cbx1	16775.5	42792.5	46002.4	4238.71	10943.2	6588.62	2.55088	2.74223	1.351	1.45535	2.58173	1.55439	1.36834	0.636351
	0.657193	0.763428	0.313038	0.215842					1096	Adm2	8632.58	16367.1	13594.5			1.89597	1.5748			0.922939	0.655165									Tnks2	20958.7	33052.1	35577.8	5673.09	7047.8	6588.62	1.57701	1.69752	0.657193	0.763428	1.24232	1.16138	0.313038	0.215842
	0.847403	1.11063	9.56e-05	0.278336					1097	Adnp	16247.3	33722.1	31733.5			2.07555	1.95316			1.05349	0.965808									Hcfc1r1	17269.5	31072.2	37291.6	5432.59	5432.95	6588.62	1.79926	2.1594	0.847403	1.11063	1.00007	1.2128	9.55995e-05	0.278336
	0.821663	1.03194	1.47737	1.08446					1098	Adnp2	21667.3	38094.1	43588.5			1.75813	2.01171			0.814045	1.00842									Trim35	20632.3	36466.4	42188.2	3104.95	8645.47	6584.32	1.76744	2.04477	0.821663	1.03194	2.78442	2.12059	1.47737	1.08446
	0.791174	0.875401	0.471556	0.542026					1099	Ado	11084.9	12879.8	18839.1			1.16192	1.69952			0.216515	0.76513									Capza1	19571.5	33868.1	35904.2	4522.15	6270.43	6584.32	1.73048	1.83452	0.791174	0.875401	1.3866	1.45602	0.471556	0.542026
	0.838536	1.09999	0.342862	0.735258					1100	Adora2b	10015.5	20502.9	34826.1			2.04712	3.47722			1.03359	1.79793									Acaca	13996.8	25029.6	30002.5	3955.27	5016.35	6584.32	1.78824	2.14353	0.838536	1.09999	1.26827	1.6647	0.342862	0.735258
	0.710825	0.851878	0.783078	0.193491					1101	Adpgk	30506.1	47825.9	49919.7			1.56775	1.63639			0.648695	0.710513									Mbd3	22513.4	36848.6	40633.3	5750.39	9895.26	6575.73	1.63674	1.80485	0.710825	0.851878	1.7208	1.14353	0.783078	0.193491
	1.26088	1.19747	0.392834	0.909776					1102	Adprh	14391.9	21366.2	25891.9			1.4846	1.79906			0.57007	0.847243									Orai1	13919.5	33357	31922.5	3500.05	4595.46	6575.73	2.39642	2.29337	1.26088	1.19747	1.31297	1.87875	0.392834	0.909776
	0.705158	0.890508	0.707467	0.139658					1103	Adprhl2	14310.3	25995.9	28563.6			1.81658	1.99601			0.861227	0.997121									Ube2a	26026.6	42431.7	48248.8	5965.12	9740.65	6571.44	1.63032	1.85383	0.705158	0.890508	1.63293	1.10164	0.707467	0.139658
	0.807197	0.718384	0.343887	-0.08585					1104	Adra2b	3049.32	3873.83	11588.6			1.27039	3.8004			0.345273	1.92615									Gm4890	21701.7	37973.8	35706.6	6974.33	8851.62	6571.44	1.74981	1.64534	0.807197	0.718384	1.26917	0.942232	0.343887	-0.0858451
	0.669157	0.923494	0.667564	0.441217					1105	Adrb2	9293.98	9637.33	20935.2			1.03694	2.25255			0.052337	1.17156									Slbp	22573.5	35895.2	42815.3	4839.95	7687.72	6571.44	1.59014	1.8967	0.669157	0.923494	1.58839	1.35775	0.667564	0.441217
	0.848439	1.11163	0.00582	0.28372					1106	Adrbk1	4642.69	4934.62	6155.13			1.06288	1.32577			0.087978	0.406828									Thoc6	17295.2	31140.9	37373.2	5398.24	5420.06	6571.44	1.80055	2.1609	0.848439	1.11163	1.00404	1.21733	0.0058197	0.28372
	0.723552	0.871258	0.047993	0.481457					1107	Adrbk2	4724.3	4887.38	11773.4			1.03452	2.49208			0.0489607	1.31735									Nup107	12562.3	20743.5	22979.7	4706.82	4866.03	6571.44	1.65124	1.82926	0.723552	0.871258	1.03383	1.39615	0.0479925	0.481457
	0.491681	0.843353	0.596451	0.140793					1108	Adrm1	13919.5	32691.3	31188			2.3486	2.2406			1.2318	1.16388									Zfp959	25000.1	35152.2	44855.6	5956.53	9006.23	6567.14	1.40608	1.79421	0.491681	0.843353	1.51199	1.10251	0.596451	0.140793
	0.555928	0.816349	0.668614	0.720566					1109	Adsl	13425.6	26730.3	27472.6			1.99099	2.04628			0.993489	1.03301									Mcat	19567.2	28766	34456.7	3985.33	6334.86	6567.14	1.47011	1.76094	0.555928	0.816349	1.58954	1.64783	0.668614	0.720566
	0.78277	1.13681	0.46223	0.588441					1110	Adss	23037.4	38283	40985.5			1.66178	1.77909			0.732729	0.831138									Dnajc9	18545	31905.4	40779.3	4367.55	6017.04	6567.14	1.72043	2.19894	0.78277	1.13681	1.37767	1.50362	0.46223	0.588441
	0.948863	0.985531	0.606621	0.202563					1111	Adssl1	9487.25	15499.6	18121.8			1.63373	1.91012			0.70817	0.933662									Zfp871	15117.8	29182.5	29933.8	5703.15	8684.12	6562.85	1.93035	1.98004	0.948863	0.985531	1.52269	1.15074	0.606621	0.202563
	0.720529	0.683817	0.45734	0.76222					1112	Aebp1	3354.25	7541.51	5510.84			2.24834	1.64294			1.16886	0.716282									Prpf3	20744	34181.6	33322.8	3869.38	5312.69	6562.85	1.64779	1.60638	0.720529	0.683817	1.37301	1.6961	0.45734	0.76222
	0.82492	1.03649	0.83155	0.848737					1113	Aebp2	3959.82	12205.6	5291.78			3.08235	1.33637			1.62403	0.418318									Ahcy	18944.4	33558.9	38859.4	3641.77	6480.88	6558.55	1.77144	2.05123	0.82492	1.03649	1.7796	1.80092	0.83155	0.848737
	0.94849	1.0882	0.214153	0.036556					1114	Aen	10578.1	20730.6	23873.1			1.95976	2.25684			0.970674	1.1743									Msh3	24261.4	46820.9	51582	6390.27	7412.86	6554.26	1.92985	2.12609	0.94849	1.0882	1.16002	1.02566	0.214153	0.036556
	1.01948	1.07686	0.518536	0.403286					1115	Aes	5033.52	14133.9	14234.5			2.80795	2.82795			1.48952	1.49976									Plaa	15139.2	30690	31935.4	4955.9	7099.33	6554.26	2.02719	2.10945	1.01948	1.07686	1.4325	1.32252	0.518536	0.403286
	0.601198	1.23994	0.249032	0.643501					1116	Afap1	6712.79	22250.9	17954.2			3.3147	2.67463			1.72888	1.41934									Scpep1	14263.1	21636.8	33687.8	4195.76	4986.28	6554.26	1.51698	2.36189	0.601198	1.23994	1.18841	1.56212	0.249032	0.643501
	0.961511	0.937238	-0.50402	0.447719					1117	Afap1l2	3955.52	3289.75	6271.1			0.831686	1.5854			-0.265889	0.664851									Acad10	16002.5	31162.4	30642.5	4805.59	3388.61	6554.26	1.94735	1.91486	0.961511	0.937239	0.705139	1.36388	-0.50402	0.447719
	0.685495	1.0158	0.949436	1.04534					1118	Aff1	10286.1	30909	22868			3.00494	2.2232			1.58734	1.15264									Ssr1	18124.1	29148.2	36647.3	3173.66	6128.71	6549.96	1.60825	2.02202	0.685495	1.0158	1.93112	2.06385	0.949436	1.04534
	0.682	1.03124	-0.07692	0.916555					1119	Aff4	19455.5	32060	42660.7			1.64786	2.19273			0.720596	1.13273									Yod1	19129.1	30690	39095.6	3469.99	3289.83	6549.96	1.60436	2.04378	0.682	1.03124	0.948081	1.8876	-0.0769185	0.916555
	0.874513	0.925127	0.392035	0.058121					1120	Afg3l1	34526	50802.1	49460.1			1.47142	1.43255			0.557205	0.518582									Rnaset2a	21272.2	39000.3	40392.8	6287.21	8250.35	6545.67	1.83339	1.89885	0.874513	0.925127	1.31224	1.04111	0.392035	0.0581209
	0.59096	0.913391	0.429985	0.146509					1121	Afg3l2	16311.7	28452.5	29250.8			1.7443	1.79324			0.802645	0.84257									Wbp4	26305.7	39623	49546	5913.58	7966.89	6545.67	1.50625	1.88347	0.59096	0.913391	1.34722	1.10689	0.429985	0.146509
	0.631965	0.767305	0.708545	0.029843					1122	Afmid	8658.35	14885.5	14243.1			1.7192	1.64502			0.78174	0.718103									Myst1	24579.2	38089.8	41836	6407.45	10470.8	6541.37	1.54967	1.70209	0.631965	0.767305	1.63416	1.0209	0.708545	0.0298425
	1.0135	1.27594	1.52686	1.0376					1123	Aftph	13627.5	30239	44834.1			2.21898	3.28998			1.1499	1.71808									Cep63	13670.4	27597.8	33103.7	3186.55	9182.32	6541.37	2.0188	2.42156	1.0135	1.27594	2.88159	2.05281	1.52686	1.0376
	0.681265	1.02148	0.646578	0.592736					1124	Aga	9031.99	22061.9	16030			2.44264	1.7748			1.28844	0.827656									Ythdf3	16294.5	26129	33077.9	4337.48	6790.11	6541.37	1.60354	2.03	0.681265	1.02148	1.56545	1.5081	0.646578	0.592736
	0.559329	-0.105562	0.032313	-0.32289					1125	Agap1	16655.3	30707.2	37390.4			1.84369	2.24496			0.882595	1.16669									Gm13235	13919.5	20511.5	12937.4	8176.8	8362.01	6537.08	1.47358	0.929443	0.559329	-0.105562	1.02265	0.799467	0.0323134	-0.32289
	0.521293	0.582567	0.221536	0.488446					1126	Agap3	3568.99	3349.87	6528.82			0.938604	1.82932			-0.0914107	0.871306									D14Abb1e	28367.2	40713.8	42480.3	4659.58	5432.95	6537.08	1.43524	1.49751	0.521293	0.582567	1.16597	1.40293	0.221536	0.488446
	1.11144	1.35278	0.815007	0.851588					1127	Agbl3	7112.21	15310.6	15888.2			2.15273	2.23394			1.10616	1.15959									Nf2	13580.2	29341.5	34684.3	3620.3	6369.22	6532.78	2.16061	2.55404	1.11144	1.35278	1.75931	1.80449	0.815007	0.851588
	0.657485	0.897903	0.769456	0.972925					1128	Agbl5	17359.6	32399.3	35406			1.86636	2.03956			0.900225	1.02826									Pi4k2a	17041.8	26880.6	31755	3328.27	5673.46	6532.78	1.57733	1.86336	0.657485	0.897903	1.70463	1.96282	0.769456	0.972925
	0.996813	1.05187	0.400854	0.619695					1129	Agfg1	22706.7	32395	32652.7			1.42667	1.43802			0.512654	0.524085									Polr3g	17711.8	35345.5	36720.3	4251.59	5613.33	6532.78	1.99559	2.07321	0.996813	1.05187	1.32029	1.53655	0.400854	0.619695
	0.507525	0.884321	0.515735	-0.20723					1130	Agfg2	9216.67	23200	25462.4			2.51718	2.76265			1.33181	1.46605									Cks2	26748.1	38025.4	49374.2	7536.92	10775.7	6528.49	1.42161	1.8459	0.507525	0.884321	1.42972	0.866201	0.515735	-0.207226
	1.03813	1.13522	1.29614	0.908251					1131	Aggf1	9482.95	19167.3	20119.1			2.02124	2.1216			1.01524	1.08516									L2hgdh	19867.8	40799.7	43640	3478.58	8542.39	6528.49	2.05356	2.19652	1.03813	1.13522	2.45571	1.87677	1.29614	0.908251
	0.698784	0.815391	0.72956	0.346028					1132	Agk	15255.2	24518.5	27592.8			1.60722	1.80875			0.684572	0.854995									Impdh2	25313.6	41087.5	44546.3	5136.27	8516.62	6528.49	1.62314	1.75977	0.698784	0.815391	1.65813	1.27106	0.72956	0.346028
	1.11295	1.5658	0.148428	0.18309					1133	Agl	11742	23505	26252.7			2.00178	2.23579			1.00128	1.16079									Cenpa	15710.4	33979.7	46509.2	5750.39	6373.51	6528.49	2.16288	2.96041	1.11295	1.5658	1.10836	1.13531	0.148428	0.18309
	0.903974	0.460765	0.741194	0.198392					1134	Agpat1	13859.4	27756.7	24818.1			2.00274	1.79071			1.00197	0.840531									Gm11942	11475.7	21473.5	15793.7	5685.97	9504.43	6524.19	1.87121	1.37627	0.903974	0.460765	1.67156	1.14742	0.741194	0.198392
	0.767226	1.26447	1.42193	0.889601					1135	Agpat2	28981.4	38875.7	41921.9			1.3414	1.44651			0.423741	0.532576									Tbrg4	17729	30174.6	42592	3521.52	9435.72	6524.19	1.70199	2.40239	0.767226	1.26447	2.67945	1.85266	1.42193	0.889601
	0.835368	0.894505	0.818387	0.638342					1136	Agpat3	9495.83	10157	10828.4			1.06963	1.14033			0.0971069	0.189453									Hspbap1	15813.5	28216.2	29396.9	4191.47	7391.38	6524.19	1.78431	1.85897	0.835368	0.894505	1.76343	1.55654	0.818387	0.638342
	0.72753	0.912255	1.17002	0.585138					1137	Agpat4	8838.73	8795.57	16592.7			0.995117	1.87727			-0.00706201	0.908633									Cbx5	21688.8	35912.4	40818	4346.07	9779.3	6519.9	1.6558	1.88198	0.72753	0.912255	2.25015	1.50018	1.17002	0.585138
	0.914162	1.00147	0.248964	0.066294					1138	Agpat5	23728.8	40366	38017.5			1.70114	1.60216			0.766498	0.680021									Dhfr	25996.5	48989.8	52045.9	6227.08	7399.97	6519.9	1.88447	2.00203	0.914162	1.00147	1.18835	1.04702	0.248964	0.066294
	0.907222	0.954687	0.436835	0.374604					1139	Agpat6	27469.6	50660.4	44920			1.84423	1.63526			0.883021	0.70952									Clk2	20280.1	38033.9	39306.1	5028.91	6807.29	6519.9	1.87543	1.93816	0.907222	0.954687	1.35363	1.29648	0.436835	0.374604
	1.3919	1.56233	0.633288	1.10461					1140	Agphd1	8606.81	20468.6	21502.2			2.37819	2.49827			1.24986	1.32093									Espl1	10140.1	26610	29946.7	3031.94	4702.83	6519.9	2.62425	2.9533	1.3919	1.56233	1.5511	2.15041	0.633288	1.10461
	0.87446	0.891525	0.812551	0.376119					1141	Agps	23308	30861.8	40633.3			1.32409	1.74332			0.404999	0.80184									G3bp2	21701.7	39786.2	40259.6	5020.32	8817.26	6515.6	1.83332	1.85514	0.87446	0.891525	1.75631	1.29785	0.812551	0.376119
	1.18164	1.03983	0.936006	1.02028					1142	Agrn	12180.1	18969.7	24045			1.55744	1.97412			0.639174	0.981209									Orc2	17329.6	39309.5	35629.3	3212.32	6145.89	6515.6	2.26835	2.05598	1.18164	1.03983	1.91322	2.02832	0.936006	1.02028
	1.06712	1.27769	1.12869	0.848553					1143	Agtpbp1	11896.6	19279	22408.5			1.62054	1.88359			0.696472	0.913489									Tmem203	13069.1	27383.1	31686.2	3616	7906.76	6511.31	2.09525	2.42451	1.06712	1.27769	2.1866	1.80069	1.12869	0.848553
	0.624276	0.889819	0.448864	0.370243					1144	Agtrap	11643.2	26202	23447.9			2.25041	2.01386			1.17019	1.00997									Btbd10	25111.8	38708.2	46530.7	5037.49	6876	6511.31	1.54144	1.85294	0.624276	0.889819	1.36497	1.29257	0.448864	0.370243
	1.16	1.40062	0.618654	0.656335					1145	Agxt2l2	23600	43496.8	53961.6			1.84308	2.28651			0.882122	1.19314									Hprt	18854.2	42131.1	49777.9	4131.35	6343.45	6511.31	2.23457	2.64015	1.16	1.40062	1.53544	1.57607	0.618654	0.656335
	0.780497	0.850957	-0.39232	-0.27534					1146	Ahctf1	27839	42844	46492.1			1.53899	1.67003			0.621987	0.739878									Prrc2a	25747.4	44226.9	46440.5	7880.48	6004.16	6511.31	1.71772	1.8037	0.780497	0.850957	0.761903	0.826258	-0.392321	-0.275336
	0.669003	0.636976	0.83734	0.122332					1147	Ahcy	18944.4	33558.9	38859.4			1.77144	2.05123			0.82492	1.03649									Zfp963	38528.8	61259.7	59914.8	5978	10681.2	6507.01	1.58997	1.55507	0.669003	0.636976	1.78675	1.08849	0.83734	0.122332
	0.601301	1.04593	0.314781	0.158009					1148	Ahcyl1	13210.9	21112.8	24556.1			1.59814	1.85878			0.676394	0.894358									Crot	25713	39008.8	53089.6	5831.98	7253.95	6507.01	1.51708	2.0647	0.601301	1.04593	1.24382	1.11575	0.314781	0.158009
	0.747031	1.17761	0.418438	0.626216					1149	Ahcyl2	7163.75	8430.52	13019			1.17683	1.81734			0.234907	0.86183									Leprot	16505	27700.9	37334.5	4212.94	5630.51	6502.72	1.67834	2.26202	0.747031	1.17761	1.33648	1.54351	0.418438	0.626216
	0.884373	0.956513	1.15202	0.741595					1150	Ahdc1	9212.38	17904.6	16579.8			1.94354	1.79973			0.958688	0.847778									Sar1a	18016.8	33258.2	34963.6	3886.56	8636.88	6498.42	1.84596	1.94061	0.884373	0.956513	2.22224	1.67202	1.15202	0.741595
	0.527426	0.693534	0.744308	0.345411					1151	Ahi1	10011.2	16989.9	23160.1			1.69708	2.31342			0.763058	1.21003									Atp1a1	28285.7	40769.7	45744.7	5114.8	8568.16	6498.42	1.44136	1.61724	0.527426	0.693534	1.67517	1.27051	0.744308	0.345411
	0.784483	0.551928	0.707222	0.631157					1152	Ahnak	11492.9	17793	13719.1			1.54817	1.1937			0.630563	0.255442									Kctd5	23479.8	40443.3	34422.3	4195.76	6850.24	6498.42	1.72247	1.46604	0.784483	0.551928	1.63266	1.54881	0.707222	0.631157
	0.404999	0.80184	0.687897	0.628206					1153	Ahnak2	10728.5	5905.23	25282			0.550427	2.35654			-0.861377	1.23667									Agps	23308	30861.8	40633.3	4204.35	6772.93	6498.42	1.32409	1.74332	0.404999	0.80184	1.61093	1.54564	0.687897	0.628206
	0.825832	1.24314	0.274716	0.360293					1154	Ahr	12390.5	24381.1	27584.3			1.96772	2.22624			0.976522	1.15461									Gm10306	13825	24505.6	32725.7	5058.97	6120.12	6494.13	1.77256	2.36714	0.825832	1.24314	1.20976	1.28369	0.274716	0.360293
	0.978422	1.50876	0.647471	0.802527					1155	Ahsa1	16805.6	33206.7	33193.9			1.97593	1.97517			0.982531	0.981975									BC030867	12025.5	23693.9	34220.5	3723.37	5832.36	6494.13	1.97031	2.84566	0.978422	1.50876	1.56642	1.74415	0.647471	0.802527
	1.02721	1.145	1.03598	0.892575					1156	Ahsa2	14245.9	27254.2	37776.9			1.91313	2.65178			0.935933	1.40696									Atp5s	18360.3	37419.8	40603.2	3495.76	7168.05	6489.83	2.03808	2.21147	1.02721	1.145	2.0505	1.85649	1.03597	0.892575
	0.769389	1.28624	0.713489	0.688017					1157	AI118078	6021.33	8786.98	10944.4			1.45931	1.8176			0.545285	0.862033									Gm10434	17780.5	30307.8	43365.1	4028.28	6605.43	6489.83	1.70455	2.43891	0.769389	1.28624	1.63976	1.61107	0.713489	0.688017
	0.988426	1.34639	1.03466	0.98497					1158	AI314180	3143.8	8748.32	11498.5			2.78272	3.6575			1.4765	1.87086									Sumo2	16174.3	32090.1	41127.3	3276.73	6712.8	6485.54	1.98402	2.54276	0.988426	1.34639	2.04863	1.97927	1.03466	0.98497
	1.0554	1.05798	0.641891	0.357426					1159	AI314976	11338.3	24548.6	23688.5			2.1651	2.08924			1.11443	1.06298									Dcp2	18746.9	38961.6	39031.2	5058.97	7893.88	6481.24	2.0783	2.08201	1.0554	1.05798	1.56037	1.28114	0.641891	0.357426
	-0.02616	1.27394	0.157213	0.352535					1160	AI316807	17681.8	34576.7	25844.7			1.9555	1.46166			0.96754	0.547606									Gm8206	13163.6	12927.1	31832.3	5076.15	5660.57	6481.24	0.982032	2.4182	-0.0261588	1.27394	1.11513	1.2768	0.157213	0.352535
	1.21068	1.316	1.2127	0.909337					1161	AI413582	11054.9	22912.3	21175.7			2.0726	1.91551			1.05144	0.937731									Tsen2	12863	29770.9	32025.6	3448.52	7992.66	6476.95	2.31447	2.48975	1.21068	1.316	2.31771	1.87818	1.2127	0.909337
	1.03405	1.68903	0.678362	0.70745					1162	AI428936	4483.79	11445.4	13199.4			2.55262	2.9438			1.35198	1.55768									Ern1	15719	32188.8	50684.3	3963.86	6343.45	6472.65	2.04776	3.22439	1.03405	1.68903	1.60032	1.63292	0.678362	0.70745
	0.55143	0.863033	-0.00635	0.162218					1163	AI429214	3173.87	5394.16	5025.47			1.69955	1.58339			0.765155	0.663015									Zfp622	17028.9	24956.6	30973.2	5780.45	5755.06	6468.36	1.46554	1.81886	0.55143	0.863033	0.995608	1.11901	-0.00635084	0.162218
	0.509506	0.932073	0.764266	0.504511					1164	AI462493	12850.1	22366.8	17915.6			1.7406	1.3942			0.799585	0.479439									Yrdc	23806.2	33889.6	45422.5	4556.51	7739.26	6464.06	1.42356	1.90802	0.509506	0.932073	1.69851	1.41864	0.764266	0.504511
	0.803536	1.19585	0.429082	0.411063					1165	AI464131	7666.24	16113.8	13465.7			2.10191	1.75649			1.0717	0.812697									Srsf1	18270.1	31888.2	41853.2	4861.42	6545.3	6464.06	1.74537	2.2908	0.803536	1.19585	1.34638	1.32966	0.429082	0.411063
	0.860371	0.53218	1.04749	0.480623					1166	AI467606	5076.47	14039.4	11485.6			2.76559	2.26251			1.46758	1.17792									Nae1	24914.2	45231.9	36028.8	4629.51	9568.86	6459.77	1.8155	1.44611	0.860371	0.53218	2.06693	1.39535	1.04749	0.480623
	0.755527	1.03353	0.923975	0.389857					1167	AI480526	13069.1	8731.14	19191.3			0.668074	1.46845			-0.58192	0.55429									Tipin	22114	37333.9	45267.9	4930.13	9354.11	6459.77	1.68825	2.04702	0.755527	1.03353	1.89734	1.31026	0.923975	0.389857
	0.870761	1.06222	1.40667	0.92723					1168	AI480653	20688.1	30406.5	36411.1			1.46976	1.76			0.555579	0.815574									Paics	18124.1	33142.3	37845.7	3396.98	9006.23	6459.77	1.82863	2.08814	0.870761	1.06222	2.65125	1.90162	1.40667	0.92723
	0.69616	0.801229	0.466545	0.403748					1169	AI597468	12339	29736.6	29074.7			2.40997	2.35633			1.26901	1.23654									Otub1	24291.5	39356.7	42329.9	4882.89	6747.16	6459.77	1.62019	1.74258	0.69616	0.801229	1.3818	1.32294	0.466545	0.403748
	0.849817	0.801754	0.711304	0.579387					1170	AI597479	17346.8	27902.7	33189.6			1.60853	1.9133			0.68574	0.936065									Scrn3	21877.8	39429.7	38137.8	4320.31	7073.57	6455.47	1.80227	1.74322	0.849817	0.801754	1.63728	1.49421	0.711304	0.579387
	0.883021	0.70952	1.18394	0.575563					1171	AI661453	4024.24	6077.01	6013.39			1.5101	1.49429			0.594645	0.579462									Agpat6	27469.6	50660.4	44920	4328.9	9835.13	6451.18	1.84423	1.63526	0.883021	0.70952	2.27197	1.49026	1.18394	0.575563
	-0.32609	0.434694	-0.25413	-0.14846					1172	AI837181	12863	19201.7	22782.1			1.49279	1.77114			0.578006	0.824679									C130026I21Rik	6390.68	5097.82	8637.8	7150.41	5995.57	6451.18	0.797696	1.35162	-0.326089	0.434694	0.838493	0.902211	-0.254129	-0.148463
	1.10555	1.26117	0.904459	0.544855					1173	AI846148	26756.7	39339.5	49198.1			1.47027	1.83872			0.55608	0.878703									Smg6	22002.3	47344.9	52737.4	4419.08	8271.82	6446.88	2.15181	2.3969	1.10555	1.26117	1.87184	1.45887	0.904459	0.544855
	0.872225	1.06207	1.41239	0.927041					1174	AI848100	9246.74	14421.6	16584.1			1.55965	1.7935			0.641219	0.842781									Ppat	18119.8	33168	37832.8	3388.39	9019.12	6442.59	1.83048	2.08792	0.872225	1.06207	2.66177	1.90137	1.41239	0.927041
	1.16981	1.48944	0.556675	0.284136					1175	AI987944	6729.97	10865.6	14947.6			1.61451	2.22104			0.691099	1.15124									Hap1	17737.6	39906.4	49803.7	5290.87	7782.21	6442.59	2.24982	2.80781	1.16981	1.48944	1.47088	1.21768	0.556675	0.284136
	0.979173	1.20294	0.682445	0.696055					1176	Aif1l	4513.85	4780.01	14260.3			1.05897	3.15924			0.0826552	1.65958									Cstb	15908	31360	36621.5	3976.74	6382.1	6442.59	1.97133	2.30208	0.979173	1.20294	1.60486	1.62007	0.682445	0.696055
	0.944557	1.21923	0.442946	0.738745					1177	Aifm1	11084.9	27065.3	26257			2.44163	2.36872			1.28784	1.2441									Brms1l	16015.4	30823.1	37287.3	3860.79	5248.27	6442.59	1.9246	2.32822	0.944557	1.21923	1.35938	1.66872	0.442946	0.738745
	1.07384	1.44862	0.066905	0.794364					1178	Aifm2	6446.52	14073.8	15063.5			2.18316	2.33669			1.12642	1.22447									Taco1	9482.95	19961.8	25883.3	3714.78	3891.11	6442.59	2.10502	2.72946	1.07383	1.44862	1.04747	1.73431	0.066905	0.794364
	0.92005	0.909229	1.10676	0.846053					1179	Aifm3	4342.06	5501.52	9101.69			1.26703	2.09617			0.341451	1.06775									Polr3c	17016	32197.4	31956.8	3581.65	7713.49	6438.29	1.89218	1.87804	0.92005	0.909229	2.15361	1.79758	1.10676	0.846053
	0.666289	0.852061	0.418396	0.44274					1180	Aig1	5819.47	7193.64	12830			1.23613	2.20467			0.305834	1.14056									Eif4h	17939.4	28469.6	32382.1	4736.88	6330.56	6438.29	1.58699	1.80508	0.666289	0.852061	1.33644	1.35918	0.418396	0.44274
	1.23443	1.69145	0.296321	0.981039					1181	Aimp1	6566.77	12055.2	11404			1.8358	1.73662			0.876406	0.796279									Acsf2	8104.31	19068.5	26175.4	3259.56	4002.77	6434	2.35289	3.22981	1.23443	1.69145	1.22801	1.97389	0.296321	0.981039
	0.563577	0.886443	0.072655	-0.26815					1182	Aimp2	13915.2	22341.1	25183.2			1.60552	1.80976			0.683037	0.8558									Atp2a2	20172.7	29813.9	37291.6	7743.05	8142.98	6429.7	1.47793	1.84861	0.563577	0.886443	1.05165	0.830383	0.0726549	-0.268151
	0.695244	0.588157	0.679827	0.615819					1183	Aip	9809.36	14322.9	14535.2			1.46012	1.48177			0.546089	0.567321									Snrpe	16285.9	26369.5	24483.1	4195.76	6721.39	6429.7	1.61916	1.50333	0.695244	0.588157	1.60195	1.53243	0.679827	0.615819
	0.463954	0.729906	0.614261	0.613379					1184	Aire	4436.54	6317.52	6000.5			1.42397	1.35252			0.509923	0.435648									Srsf11	14808.5	20425.6	24560.4	4200.06	6429.34	6425.41	1.37932	1.65853	0.463954	0.729906	1.53077	1.52984	0.614261	0.613379
	0.859736	0.989349	0.496409	0.179782					1185	Airn	3221.11	13201.9	16004.2			4.09857	4.96854			2.03512	2.31282									Etf1	19567.2	35508.7	38846.5	5668.79	7996.95	6421.11	1.81471	1.98529	0.859736	0.989349	1.4107	1.13271	0.496409	0.179782
	1.00908	1.07234	-0.42621	0.540478					1186	AK010878	3311.3	3014.89	3981.72			0.910485	1.20246			-0.135292	0.265994									Serpinb6a	11175.1	22491.4	23499.5	4414.79	3285.54	6421.11	2.01263	2.10284	1.00908	1.07234	0.744212	1.45445	-0.426214	0.540478
	0.996706	0.988414	1.11361	0.26205					1187	AK129341	5063.59	6356.17	13641.8			1.25527	2.6941			0.327997	1.4298									Gm15541	25700.2	51283.1	50989.2	5351	11578.8	6416.82	1.99544	1.984	0.996706	0.988414	2.16386	1.19918	1.11361	0.26205
	0.82584	1.23942	0.182154	0.319933					1188	Ak3	9852.3	13008.7	19444.7			1.32037	1.97362			0.400942	0.980845									5830433M19Rik	13296.8	23569.4	31394.2	5140.56	5832.36	6416.82	1.77257	2.36104	0.82584	1.23942	1.13458	1.24827	0.182154	0.319933
	0.613991	0.54685	0.69894	-0.22153					1189	Ak4	8761.42	15649.9	19985.9			1.78623	2.28113			0.836919	1.18975									Atp13a1	32924.1	50389.8	48098.5	7476.79	12137.2	6412.52	1.53049	1.46089	0.613991	0.54685	1.62331	0.857657	0.69894	-0.221528
	0.674303	0.819393	0.526564	0.442196					1190	Akap1	19270.8	31226.8	36922.2			1.62042	1.91596			0.696367	0.938069									Slc5a3	22848.4	36462.1	40319.8	4719.7	6798.7	6412.52	1.59583	1.76466	0.674303	0.819393	1.44049	1.35867	0.526564	0.442196
	0.673164	0.805091	1.13875	0.902963					1191	Akap10	15104.9	32257.6	40620.4			2.13557	2.68923			1.09462	1.42719									5930416I19Rik	21972.3	35036.2	38391.2	3427.04	7546	6408.23	1.59457	1.74726	0.673164	0.805091	2.2019	1.8699	1.13875	0.902963
	0.76482	0.871609	0.264579	0.586105					1192	Akap11	13498.6	26137.6	31673.4			1.93632	2.34642			0.953317	1.23046									Uimc1	24686.6	41946.4	45169.1	4268.77	5128.01	6408.23	1.69916	1.8297	0.76482	0.871609	1.20129	1.50119	0.264579	0.586105
	0.976074	1.12942	1.15592	0.473459					1193	Akap12	10913.1	18441.5	23907.5			1.68984	2.19071			0.756891	1.1314									Fmr1	22358.8	43982.1	48914.6	4612.34	10277.5	6403.93	1.96711	2.18771	0.976074	1.12942	2.22826	1.38843	1.15592	0.473459
	0.733994	0.869524	0.426382	0.053395					1194	Akap13	19021.7	34503.7	39692.7			1.81391	2.0867			0.859103	1.06122									Anln	27881.9	46374.3	50942	6171.25	8293.29	6403.93	1.66324	1.82706	0.733994	0.869524	1.34386	1.0377	0.426382	0.0533948
	0.981451	0.809752	0.75095	0.472117					1195	Akap17b	12343.3	29169.7	34216.2			2.3632	2.77204			1.24074	1.47095									Gm16884	14988.9	29594.8	26274.2	4616.63	7769.33	6403.93	1.97445	1.75291	0.981451	0.809752	1.6829	1.38714	0.75095	0.472117
	0.429742	0.670576	0.931936	-0.02573					1196	Akap5	10067	16259.8	20316.7			1.61515	2.01814			0.691667	1.01302									Hnrnpa0	24257.1	32674.2	38610.2	6514.82	12429.2	6399.64	1.34699	1.59171	0.429742	0.670576	1.90783	0.98232	0.931936	-0.0257346
	0.602101	0.919117	0.642543	0.861792					1197	Akap8	21126.2	36548	35646.5			1.72998	1.68731			0.790759	0.754728									Mat2b	14585.2	22139.2	27580	3521.52	5497.37	6399.64	1.51793	1.89096	0.602101	0.919117	1.56108	1.81729	0.642543	0.861792
	0.867681	1.26909	0.060747	0.751737					1198	Akap8l	15594.5	26433.9	29895.1			1.69508	1.91703			0.761357	0.938875									8430410A17Rik	11789.3	21512.2	28413.2	3800.67	3964.12	6399.64	1.82473	2.41009	0.867681	1.26909	1.04301	1.68382	0.0607469	0.751737
	1.32377	1.5208	0.642407	0.558734					1199	Akap9	11905.2	17853.1	27558.5			1.4996	2.31482			0.58458	1.2109									1700003G18Rik	10539.5	26382.4	30243	4341.78	6777.22	6395.34	2.5032	2.8695	1.32377	1.5208	1.56093	1.47298	0.642407	0.558734
	0.966158	0.760826	0.665577	0.671481					1200	Akirin1	21456.9	38557.9	43279.2			1.79699	2.01703			0.845585	1.01223									Picalm	15762	30793.1	26708	4015.39	6369.22	6395.34	1.95363	1.69446	0.966158	0.760826	1.5862	1.59271	0.665577	0.671481
	0.526794	0.768999	0.692834	0.90549					1201	Akirin2	5106.53	4225.99	8835.38			0.827566	1.73021			-0.273054	0.790949									Taf2	19030.3	27417.4	32429.3	3414.16	5518.84	6395.34	1.44072	1.70409	0.526794	0.768999	1.61646	1.87318	0.692834	0.90549
	0.884876	0.699977	1.03905	0.348274					1202	Akr1a1	15250.9	26184.8	27133.3			1.71694	1.77913			0.779839	0.831169									Rpl21	19296.6	35633.2	31346.9	5020.32	10316.1	6391.05	1.84661	1.62448	0.884876	0.699977	2.05488	1.27304	1.03905	0.348274
	0.737615	0.628992	0.793702	0.60417					1203	Akr1b10	5093.65	8310.26	12271.6			1.63149	2.4092			0.706194	1.26855									Serac1	19889.3	33163.8	30758.5	4204.35	7288.31	6391.05	1.66742	1.54648	0.737615	0.628992	1.73352	1.5201	0.793702	0.60417
	0.842626	1.24014	0.815415	0.720751					1204	Akr1b3	15250.9	22813.5	28761.2			1.49588	1.88587			0.580994	0.915229									Ccdc99	15899.4	28512.6	37557.9	3877.97	6824.47	6391.05	1.79331	2.36222	0.842626	1.24014	1.7598	1.64804	0.815415	0.720751
	0.975497	1.14917	0.769009	0.937562					1205	Akr1e1	3242.58	12098.2	13581.7			3.73104	4.18854			1.89958	2.06645									Dnajc1	17110.5	33644.8	37948.8	3336.86	5686.34	6391.05	1.96632	2.21786	0.975497	1.14917	1.7041	1.91529	0.769009	0.937562
	0.70809	0.865578	0.013927	0.519744					1206	Akr7a5	20357.4	44514.7	43807.5			2.18666	2.15192			1.12873	1.10562									Gm12057	12369.1	20206.6	22537.3	4457.73	4500.97	6391.05	1.63364	1.82207	0.70809	0.865578	1.0097	1.4337	0.0139267	0.519744
	1.11039	1.49973	0.180126	0.913623					1207	Akt1	3388.61	4225.99	5192.99			1.24712	1.53248			0.318596	0.615872									Stk25	12579.5	27159.7	35573.5	3392.69	3843.86	6391.05	2.15905	2.82789	1.11039	1.49973	1.13298	1.88377	0.180126	0.913623
	0.803316	0.894705	0.432638	0.073818					1208	Akt1s1	6605.42	12291.5	13092			1.86081	1.98201			0.895934	0.986963									Crk	25683	44819.6	47750.6	6068.18	8190.22	6386.75	1.74511	1.85923	0.803316	0.894705	1.3497	1.0525	0.432638	0.0738181
	0.778551	0.949712	0.722347	0.844875					1209	Akt2	13030.5	18248.2	21437.7			1.40043	1.6452			0.485867	0.718262									Pomgnt1	16874.3	28946.3	32592.5	3555.88	5866.72	6386.75	1.71541	1.93149	0.778551	0.949712	1.64986	1.79611	0.722347	0.844875
	0.961301	0.907916	0.253649	0.086181					1210	Aktip	14168.6	29843.9	24551.8			2.10635	1.73283			1.07474	0.793133									3110053B16Rik	18514.9	36049.8	34740.2	6012.36	7168.05	6382.46	1.94706	1.87633	0.961301	0.907916	1.19222	1.06156	0.253649	0.0861812
	1.024	0.992455	0.822107	0.320887					1211	Alad	21852	33636.2	36260.7			1.53927	1.65938			0.622247	0.730641									Pum2	18154.2	36917.3	36119	5106.21	9027.71	6378.16	2.03354	1.98957	1.024	0.992455	1.76799	1.2491	0.822107	0.320887
	0.831177	1.31002	0.844423	0.763283					1212	Alas1	21448.3	36092.7	30745.6			1.68278	1.43347			0.750845	0.519516									Hebp1	12583.8	22388.3	31200.9	3757.72	6747.16	6378.16	1.77914	2.47945	0.831177	1.31002	1.79555	1.69735	0.844423	0.763283
	0.830467	1.07852	0.795373	0.578349					1213	Aldh16a1	22118.3	41899.2	45383.9			1.89432	2.05187			0.921683	1.03694									1700017B05Rik	19043.2	33863.8	40216.7	4268.77	7408.56	6373.87	1.77826	2.11186	0.830467	1.07852	1.73553	1.49314	0.795373	0.578349
	0.125695	0.627262	0.215528	0.286338					1214	Aldh18a1	6631.19	14941.3	16876.1			2.25319	2.54496			1.17197	1.34765									Sema4b	18158.5	19811.5	28048.2	5226.45	6068.58	6373.87	1.09103	1.54463	0.125695	0.627262	1.16113	1.21954	0.215528	0.286338
	1.10094	0.862632	0.692923	0.270436					1215	Aldh1a2	3616.23	3160.91	4325.34			0.87409	1.19609			-0.194146	0.258327									Dctn6	16084.1	34499.4	29246.5	5273.69	8525.21	6360.98	2.14494	1.81835	1.10094	0.862632	1.61656	1.20617	0.692923	0.270436
	0.509147	0.510531	0.810068	0.914144					1216	Aldh1b1	6206.01	8598.01	9342.23			1.38543	1.50535			0.470337	0.590101									Pnrc2	21877.8	31136.7	31166.5	3375.51	5918.26	6360.98	1.42321	1.42457	0.509147	0.510531	1.75329	1.88445	0.810068	0.914144
	0.689892	1.53543	0.449265	0.721957					1217	Aldh1l2	4762.95	5265.31	7014.19			1.10547	1.47266			0.144663	0.558421									Chchd7	14379	23195.7	41681.4	3856.5	5265.45	6360.98	1.61316	2.89876	0.689892	1.53543	1.36534	1.64942	0.449265	0.721957
	0.908608	1.16267	0.794535	0.484434					1218	Aldh2	18149.9	25613.7	33099.4			1.41123	1.82367			0.496952	0.866844									Ttl	20963	39352.4	46930.2	4543.62	7880.99	6356.69	1.87723	2.23872	0.908608	1.16267	1.73452	1.39904	0.794535	0.484434
	0.744729	0.954934	0.742531	0.565772					1219	Aldh3a2	14211.5	30775.9	42166.7			2.16556	2.96708			1.11474	1.56904									Banf1	18858.5	31600.5	36557.1	4294.54	7185.23	6356.69	1.67566	1.93849	0.744729	0.954934	1.67311	1.48018	0.742531	0.565772
	0.684841	0.381183	0.360943	0.403562					1220	Aldh4a1	15731.9	21164.3	22210.9			1.34531	1.41184			0.427941	0.497572									Gm13243	14194.4	22817.8	18486.9	4805.59	6171.65	6356.69	1.60753	1.30241	0.684841	0.381183	1.28426	1.32277	0.360943	0.403562
	1.08259	1.29822	0.242522	-0.07952					1221	Aldh5a1	5222.49	9937.96	10252.8			1.90292	1.96321			0.928212	0.973211									Dag1	18433.3	39038.9	45332.3	6712.36	7941.12	6352.39	2.11784	2.45926	1.0826	1.29822	1.18306	0.946372	0.242522	-0.0795206
	0.412066	0.758527	0.774508	0.770691					1222	Aldh6a1	9697.69	15856.1	23971.9			1.63504	2.47192			0.709322	1.30563									Ppm1a	19537.1	25995.9	33052.2	3723.37	6369.22	6352.39	1.33059	1.69176	0.412066	0.758527	1.71061	1.70609	0.774508	0.770691
	0.680495	1.27023	0.050018	0.79587					1223	Aldh7a1	8563.86	13678.6	16433.7			1.59725	1.91896			0.675593	0.940327									Ttyh2	15740.5	25227.1	37965.9	3658.95	3788.03	6352.39	1.60269	2.41199	0.680495	1.27023	1.03528	1.73612	0.0500181	0.79587
	0.465597	0.626991	0.993691	0.251156					1224	Aldh9a1	11815	17372.1	32188.8			1.47034	2.72439			0.556149	1.44594									Ctnna1	27465.3	37926.6	42415.8	5333.82	10621.1	6348.1	1.38089	1.54434	0.465597	0.626991	1.99127	1.19016	0.993691	0.251156
	0.732729	0.831138	0.040811	-0.12055					1225	Aldoc	10694.1	20923.8	28134.1			1.95658	2.6308			0.968333	1.3955									Adss	23037.4	38283	40985.5	6901.32	7099.33	6348.1	1.66178	1.77909	0.732729	0.831138	1.02869	0.919839	0.0408105	-0.120547
	1.007	1.25543	0.699712	0.642385					1226	Alg1	20275.8	35255.3	33559			1.73878	1.65512			0.798079	0.726939									Ccdc45	15809.2	31772.3	37742.6	4066.93	6605.43	6348.1	2.00973	2.38738	1.007	1.25543	1.62418	1.56091	0.699712	0.642385
	0.942918	1.16796	0.469311	0.723863					1227	Alg10b	17286.6	26760.3	32296.2			1.54804	1.86828			0.63044	0.901707									Rad51	14954.5	28748.8	33601.9	3843.61	5321.28	6348.1	1.92241	2.24694	0.942918	1.16796	1.38445	1.6516	0.469311	0.723863
	0.931827	1.06922	0.209008	0.032774					1228	Alg11	15272.4	24428.3	21497.9			1.59951	1.40763			0.677631	0.49327									Serp1	22204.2	42358.7	46590.9	6201.31	7168.05	6343.8	1.90769	2.09829	0.931827	1.06922	1.15589	1.02298	0.209008	0.0327743
	0.256026	0.469018	0.331267	0.284263					1229	Alg12	11802.1	21078.4	24916.9			1.78598	2.11122			0.836718	1.07807									Fabp3	24347.3	29075.2	33700.7	5209.28	6553.89	6343.8	1.19418	1.38417	0.256026	0.469018	1.25812	1.21779	0.331267	0.284263
	1.21283	1.55239	0.691442	0.705262					1230	Alg13	13382.6	16126.6	24259.7			1.20504	1.81278			0.269082	0.8582									Cntrob	15573	36097	45676	3890.85	6283.32	6343.8	2.31792	2.93302	1.21283	1.55239	1.6149	1.63044	0.691442	0.705262
	1.11489	1.50329	0.534236	0.737466					1231	Alg14	7056.38	14760.9	13659			2.09185	1.93569			1.06478	0.95285									Snx4	10307.5	22323.9	29220.8	3804.96	5510.25	6343.8	2.16578	2.83489	1.11489	1.50329	1.44818	1.66724	0.534236	0.737466
	0.720835	1.09923	0.991066	0.617758					1232	Alg2	16367.5	24810.5	34018.6			1.51584	2.07842			0.600116	1.05549									Ggps1	17187.8	28327.9	36823.4	4131.35	8211.69	6339.51	1.64814	2.14241	0.720835	1.09923	1.98765	1.53449	0.991066	0.617758
	0.945566	0.942697	0.253167	-0.02502					1233	Alg3	12150	23389	26609.2			1.92501	2.19005			0.94487	1.13097									Rbm8a	14739.8	28388	28331.6	6450.4	7687.72	6339.51	1.92594	1.92212	0.945566	0.942697	1.19182	0.982809	0.253167	-0.0250173
	0.376619	0.894839	0.562591	0.704286					1234	Alg5	13868	22014.7	24405.8			1.58745	1.75987			0.66671	0.815466									Dyrk3	16685.3	21662.5	31024.8	3890.85	5746.47	6339.51	1.2983	1.8594	0.376619	0.894839	1.47692	1.62934	0.562591	0.704286
	0.909693	1.20441	0.595618	-0.02119					1235	Alg6	16599.5	33567.4	34091.6			2.0222	2.05378			1.01593	1.03828									Rab11fip1	18905.8	35517.2	43567	6428.93	9714.88	6335.21	1.87865	2.30443	0.909693	1.20441	1.51112	0.985422	0.595618	-0.0211862
	1.08662	1.17188	0.935699	0.409031					1236	Alg8	21937.9	32618.3	34516.8			1.48685	1.57339			0.572256	0.653874									Sec61g	14915.9	31677.8	33606.2	4771.23	9126.49	6335.21	2.12376	2.25305	1.08662	1.17188	1.91282	1.32779	0.935699	0.409031
	0.941177	1.1822	0.958098	0.78858					1237	Alg9	4165.97	6600.97	6511.64			1.5845	1.56305			0.664026	0.644368									Siva1	19575.8	37587.3	44421.7	3667.54	7125.1	6335.21	1.92009	2.26922	0.941177	1.1822	1.94275	1.72737	0.958098	0.78858
	0.642606	1.1171	0.798952	0.877415					1238	Alkbh1	16238.7	24273.7	27292.2			1.49481	1.68069			0.579959	0.749052									Eif5a	18566.5	28985	40272.5	3448.52	5999.86	6335.21	1.56115	2.1691	0.642606	1.1171	1.73984	1.83708	0.798952	0.877415
	0.470712	0.875849	0.560112	0.753535					1239	Alkbh2	13928.1	34709.8	36320.8			2.49208	2.60774			1.31735	1.3828									Clybl	17454.1	24187.8	32029.9	3757.72	5540.32	6335.21	1.38579	1.83509	0.470712	0.875849	1.47438	1.68592	0.560112	0.753535
	1.00528	1.3436	0.794181	0.517266					1240	Alkbh3	8387.77	9912.19	10398.9			1.18174	1.23976			0.240917	0.310066									Uqcr10	13374	26846.2	33941.3	4423.38	7670.55	6330.92	2.00734	2.53785	1.00528	1.3436	1.73409	1.43124	0.794181	0.517266
	0.64035	0.617391	0.732009	0.780864					1241	Alkbh4	7073.56	14176.8	11554.3			2.0042	1.63345			1.00303	0.70792									Armc6	17656	27520.5	27086	3684.71	6120.12	6330.92	1.55871	1.5341	0.64035	0.617391	1.66095	1.71816	0.732009	0.780864
	0.993548	1.0948	-0.07724	0.15719					1242	Alkbh5	3796.62	5334.03	8298.47			1.40494	2.18575			0.49051	1.12813									4930481B07Rik	17419.8	34684.1	37205.7	5677.38	5381.41	6330.92	1.99108	2.13583	0.993548	1.0948	0.947869	1.11511	-0.0772411	0.15719
	0.606723	0.688355	0.790721	0.417498					1243	Alkbh6	8357.71	14851.1	17859.8			1.77694	2.13692			0.829391	1.09553									Phlda3	19279.4	29358.6	31067.7	4736.88	8194.51	6326.62	1.5228	1.61145	0.606723	0.688355	1.72994	1.33561	0.790721	0.417498
	0.811048	0.770888	0.716747	0.57781					1244	Alkbh7	15590.2	23573.7	26205.5			1.51208	1.6809			0.596538	0.749231									Ddx56	15886.5	27872.7	27107.5	4238.71	6966.2	6326.62	1.75449	1.70632	0.811048	0.770888	1.64347	1.49258	0.716747	0.57781
	1.10597	1.24145	-0.22818	0.309182					1245	Alkbh8	5591.85	10320.2	9514.04			1.84558	1.70141			0.884072	0.766732									Fam60a	12420.6	26734.6	29366.8	5106.21	4359.24	6326.62	2.15244	2.36436	1.10597	1.24145	0.853713	1.23901	-0.228176	0.309182
	1.03631	1.1322	0.341343	0.463041					1246	Alms1	9607.5	24398.2	32115.8			2.5395	3.34278			1.34454	1.74105									Trappc2	17677.5	36255.9	38747.7	4586.57	5810.89	6322.33	2.05097	2.19193	1.03631	1.1322	1.26694	1.37844	0.341343	0.463041
	0.433363	1.35892	0.330329	0.95009					1247	Alox5	3959.82	3465.83	9995.11			0.875249	2.52413			-0.192234	1.33579									Maoa	15676.1	21168.6	40208.1	3272.44	4114.44	6322.33	1.35038	2.56493	0.433363	1.35892	1.2573	1.93199	0.330329	0.95009
	0.937986	1.01524	0.857156	1.06128					1248	Alpk3	6094.34	12901.3	9870.54			2.11693	1.61962			1.08198	0.695659									Arl15	14911.6	28568.4	30140	3027.65	5484.48	6318.03	1.91585	2.02124	0.937986	1.01524	1.81146	2.08678	0.857156	1.06128
	0.342386	0.569099	0.456259	0.669446					1249	Alpl	17316.7	20275.3	20681.8			1.17085	1.19432			0.227561	0.256195									Gsta4	17892.2	22684.7	26544.8	3972.45	5450.12	6318.03	1.26785	1.4836	0.342386	0.569099	1.37198	1.59046	0.456259	0.669446
	0.526801	0.654363	0.868916	0.521775					1250	Als2	18197.1	36968.9	39782.8			2.03158	2.18622			1.0226	1.12844									Hirip3	22187	31965.5	34920.6	4397.61	8031.31	6313.74	1.44073	1.57392	0.526801	0.654363	1.82629	1.43572	0.868916	0.521775
	1.04666	1.38894	0.165951	0.51896					1251	Als2cl	8688.41	14121	19766.9			1.62527	2.27508			0.700679	1.18592									Rbmx	11553	23865.7	30255.9	4406.2	4943.34	6313.74	2.06575	2.61887	1.04666	1.38894	1.12191	1.43292	0.165951	0.51896
	0.564374	0.786815	0.966126	0.737794					1252	Als2cr4	9143.66	12312.9	24843.9			1.34661	2.71706			0.42933	1.44205									Tspan13	21152	31278.4	36492.7	3783.49	7391.38	6309.44	1.47875	1.72526	0.564374	0.786815	1.95359	1.66762	0.966126	0.737794
	1.48007	1.66436	1.12176	1.00312					1253	Alyref	9736.34	15813.1	19865.7			1.62413	2.04036			0.699671	1.02882									Pcyox1	15744.8	43922	49906.8	3147.9	6850.24	6309.44	2.78962	3.16973	1.48007	1.66436	2.17613	2.00433	1.12176	1.00312
	1.33597	1.21313	0.844713	0.86258					1254	Alyref2	10646.8	17329.2	17383			1.62763	1.63269			0.702776	0.70725									Mcart1	17170.7	43346.5	39808.6	3469.99	6231.78	6309.44	2.52445	2.31841	1.33597	1.21313	1.79591	1.81829	0.844713	0.86258
	1.33597	1.21313	0.844713	0.86258					1255	Amacr	23428.2	39567.2	45585.8			1.68887	1.94576			0.756057	0.960336									Mcart1	17170.7	43346.5	39808.6	3469.99	6231.78	6309.44	2.52445	2.31841	1.33597	1.21313	1.79591	1.81829	0.844713	0.86258
	0.962729	1.12432	0.723204	0.848369					1256	Ambra1	11643.2	17264.7	22829.4			1.48281	1.96074			0.568335	0.9714									Rassf7	18373.2	35809.3	40053.4	3504.34	5785.12	6309.44	1.94899	2.17999	0.962729	1.12432	1.65084	1.80046	0.723204	0.848369
	1.00704	1.53369	0.810902	0.535393					1257	Amd-ps3	5982.68	10526.3	11644.5			1.75947	1.94637			0.815139	0.960784									Phb	11364.1	22839.3	32901.8	4350.37	7631.89	6305.15	2.00978	2.89525	1.00704	1.53369	1.75431	1.44934	0.810902	0.535393
	0.783545	1.10371	0.450459	0.303066					1258	Amd1	12837.2	22100.6	22631.8			1.7216	1.76299			0.783754	0.818021									Fzd5	25451.1	43810.3	54696	5110.5	6983.37	6305.15	1.72136	2.14907	0.783545	1.10371	1.36647	1.23376	0.450459	0.303066
	0.68225	0.977623	0.758942	0.680607					1259	Amd2	4947.63	11909.2	7825.99			2.40706	1.58177			1.26727	0.661536									C80913	20924.3	33576	41204.6	3933.8	6656.97	6305.15	1.60464	1.96922	0.68225	0.977623	1.69225	1.60281	0.758942	0.680607
	0.75934	0.919576	0.158111	0.353647					1260	Amdhd2	24119.7	36170.1	34134.6			1.49961	1.41522			0.584585	0.501022									Nr1h3	14705.4	24892.1	27816.2	4934.43	5505.96	6305.15	1.69272	1.89156	0.75934	0.919576	1.11582	1.27779	0.158111	0.353647
	1.1447	1.01113	0.55531	0.203679					1261	Amfr	10634	16229.7	15750.8			1.52622	1.48118			0.609958	0.566744									Umps	12656.8	27984.3	25509.6	5471.24	8039.9	6300.85	2.21101	2.01549	1.1447	1.01113	1.46948	1.15163	0.55531	0.203679
	0.69814	0.935897	0.610727	0.397293					1262	Amh	5458.71	10126.9	6954.05			1.85519	1.27394			0.891565	0.349293									Mtdh	20851.3	33829.4	39890.2	4784.12	7305.49	6300.85	1.62241	1.91308	0.69814	0.935897	1.52703	1.31703	0.610727	0.397293
	0.656229	0.91069	0.792763	0.842872					1263	Amigo1	3792.32	5312.56	5188.69			1.40087	1.36821			0.486327	0.45229									Commd5	17999.6	28366.6	33838.2	3512.93	6085.76	6300.85	1.57596	1.87994	0.656229	0.91069	1.73239	1.79362	0.792763	0.842872
	0.7372	1.12681	0.463297	0.271103					1264	Amigo2	7314.07	6390.53	15673.5			0.873731	2.14292			-0.194739	1.09958									Pigl	13760.6	22938	30049.8	5217.87	7193.82	6296.56	1.66694	2.18375	0.7372	1.12681	1.37869	1.20673	0.463297	0.271103
	0.559663	0.971365	0.085286	0.434364					1265	Amigo3	11913.8	18587.5	17696.5			1.56016	1.48538			0.641697	0.570831									Taf10	18802.7	27713.8	36866.3	4659.58	4943.34	6296.56	1.47392	1.96069	0.559663	0.971365	1.0609	1.35131	0.0852862	0.434364
	0.872227	0.97423	1.07176	0.864016					1266	Ammecr1	5265.44	10358.8	9101.69			1.96733	1.72857			0.976236	0.78958									Msto1	19412.6	35534.4	38137.8	3457.1	7266.83	6292.26	1.83049	1.96459	0.872227	0.97423	2.102	1.8201	1.07176	0.864016
	0.803246	0.92482	0.413976	0.230301					1267	Ammecr1l	10642.5	20077.8	20905.1			1.88656	1.9643			0.915755	0.974012									Rnpc3	23720.3	41392.4	45031.7	5363.88	7146.58	6292.26	1.74502	1.89845	0.803246	0.92482	1.33235	1.17308	0.413976	0.230301
	1.1272	1.0023	0.249774	0.273686					1268	Amn1	16204.3	28856.2	29959.5			1.78077	1.84886			0.832499	0.886637									Crocc	17282.3	37750.5	34619.9	5204.98	6188.83	6292.26	2.18434	2.0032	1.1272	1.0023	1.18902	1.20889	0.249774	0.273686
	1.14579	0.792694	0.051345	0.112782					1269	Ampd2	14065.5	19317.6	27915			1.3734	1.98464			0.457753	0.988878									Wbp11	16273	36006.8	28189.9	5819.1	6029.93	6292.26	2.21267	1.73231	1.14579	0.792694	1.03623	1.08131	0.0513452	0.112782
	0.680666	0.853564	0.750171	1.01901					1270	Amph	8164.44	16350	17761			2.00258	2.17541			1.00186	1.12128									Mrps36	19425.5	31136.7	35101	3104.95	5222.5	6292.26	1.60288	1.80696	0.680666	0.853564	1.68199	2.02653	0.750171	1.01901
	0.826141	0.616703	0.622153	-0.37135					1271	Amt	9195.2	18424.3	19230			2.00369	2.0913			1.00266	1.0644									Gm13139	13129.2	23277.3	20132	8133.86	12519.4	6287.96	1.77294	1.53337	0.826141	0.616703	1.53917	0.77306	0.622153	-0.371348
	0.546221	0.83011	1.07782	0.421796					1272	Amz2	10367.7	22714.7	25879			2.19092	2.49613			1.13153	1.31969									Ywhaq	25687.3	37510	45667.4	4693.93	9908.15	6287.96	1.46026	1.77782	0.546221	0.83011	2.11084	1.33959	1.07782	0.421796
	1.16734	1.39678	0.374997	0.362321					1273	Anapc1	13971	28521.2	22215.2			2.04145	1.59009			1.02959	0.669107									1110001A16Rik	13756.3	30896.1	36222.1	4891.48	6343.45	6287.96	2.24596	2.63313	1.16734	1.39678	1.29684	1.28549	0.374997	0.362321
	0.94105	0.812463	0.975642	0.298143					1274	Anapc10	13395.5	27829.7	23035.6			2.07754	1.71965			1.05487	0.782111									Polr2b	25330.8	48633.3	44486.2	5110.5	10049.9	6283.67	1.91993	1.75621	0.94105	0.812463	1.96652	1.22956	0.975642	0.298143
	0.756498	0.623538	0.514489	0.840695					1275	Anapc11	13339.7	31664.9	37467.7			2.37374	2.80874			1.24716	1.48992									AA543186	14215.8	24016	21901.6	3508.64	5012.05	6283.67	1.68938	1.54065	0.756498	0.623538	1.42849	1.79091	0.514489	0.840695
	0.571811	0.629546	0.712221	0.143213					1276	Anapc13	13030.5	26116.1	32059.9			2.00424	2.46038			1.00305	1.29888									Btaf1	34010.6	50553	52617.1	5685.97	9315.46	6279.37	1.48639	1.54708	0.571811	0.629546	1.63832	1.10436	0.712221	0.143213
	1.0261	1.11089	1.51332	0.965079					1277	Anapc16	21031.7	46833.8	44146.8			2.22682	2.09906			1.15498	1.06974									Lima1	22556.4	45936.2	48717	3216.61	9182.32	6279.37	2.03651	2.15979	1.0261	1.11089	2.85466	1.95217	1.51332	0.965079
	0.976653	1.48611	0.755328	0.659034					1278	Anapc2	6279.02	18411.4	18779			2.93221	2.99075			1.55199	1.58051									Trim11	11656.1	22938	32652.7	3976.74	6712.8	6279.37	1.9679	2.80133	0.976653	1.48611	1.68802	1.57902	0.755328	0.659034
	1.2579	1.5887	0.999064	1.05857					1279	Anapc4	11939.6	29182.5	29396.9			2.44419	2.46214			1.28935	1.29991									Slc6a6	10354.8	24763.3	31145	3014.77	6025.63	6279.37	2.39148	3.00779	1.2579	1.5887	1.9987	2.08287	0.999064	1.05857
	0.559917	0.980023	0.617362	0.990339					1280	Anapc5	20954.4	42307.2	38992.5			2.01901	1.86083			1.01365	0.895944									Sept11	21074.7	31067.9	41569.7	3160.78	4848.85	6279.37	1.47418	1.9725	0.559917	0.980023	1.53407	1.98665	0.617362	0.990339
	0.522897	0.849291	-0.06362	0.623636					1281	Angel1	18944.4	37364	45865			1.97229	2.42103			0.979874	1.27562									Ttc17	20546.4	29521.8	37016.7	4075.52	3899.7	6279.37	1.43684	1.80162	0.522897	0.849291	0.956859	1.54075	-0.063621	0.623636
	0.563098	0.583909	0.609578	0.47674					1282	Angptl2	4436.54	5913.82	11910.8			1.33298	2.6847			0.414655	1.42476									Atp6v1b2	25644.3	37887.9	38438.4	4509.27	6880.3	6275.08	1.47744	1.4989	0.563098	0.583909	1.52581	1.3916	0.609578	0.47674
	0.836834	0.8404	0.192867	0.047381					1283	Angptl4	22255.7	37291	40908.2			1.67557	1.8381			0.744649	0.878214									Fscn1	21551.4	38493.5	38588.8	6068.18	6936.13	6270.78	1.78613	1.79055	0.836834	0.8404	1.14303	1.03339	0.192867	0.047381
	0.912675	1.20351	1.10742	0.365007					1284	Ank	3925.46	7343.95	8938.47			1.87085	2.27705			0.903695	1.18717									Usp53	21250.7	40005.2	48940.4	4865.71	10483.6	6266.49	1.88253	2.303	0.912675	1.20351	2.1546	1.28789	1.10742	0.365007
	0.91458	0.71601	0.418366	0.542271					1285	Ank2	5746.46	9538.55	10690.9			1.6599	1.86044			0.731096	0.895643									Ociad1	16852.8	31768	27683	4303.13	5750.76	6266.49	1.88502	1.64263	0.91458	0.71601	1.33641	1.45626	0.418366	0.542271
	0.761054	1.05916	0.969004	0.565969					1286	Ankfy1	21255	39021.7	36565.7			1.83588	1.72033			0.876473	0.782685									Cpsf3l	20937.2	35482.9	43627.1	4230.12	8280.41	6262.19	1.69473	2.08371	0.761054	1.05916	1.95749	1.48038	0.969004	0.565969
	0.77461	0.835768	1.0305	0.708059					1287	Ankhd1	12029.8	14958.5	22709.1			1.24345	1.88774			0.314352	0.916662									Gga2	20937.2	35817.9	37368.9	3830.73	7825.16	6257.9	1.71073	1.78481	0.77461	0.835768	2.04273	1.63361	1.0305	0.708059
	0.607193	0.563707	0.249808	-0.02923					1288	Ankib1	16586.6	23281.6	33876.8			1.40364	2.04243			0.489176	1.03028									Terf2	20894.3	31828.1	30883	6385.98	7593.24	6257.9	1.52329	1.47806	0.607193	0.563707	1.18905	0.979944	0.249808	-0.0292294
	1.3344	1.41435	0.815705	0.661902					1289	Ankle1	22981.5	40713.8	38348.2			1.77159	1.66865			0.825044	0.738684									9330159M07Rik	12824.3	32339.2	34181.8	3955.27	6961.9	6257.9	2.52171	2.66539	1.3344	1.41435	1.76016	1.58217	0.815705	0.661902
	0.523894	0.799514	0.198247	0.086894					1290	Ankle2	15216.5	29977.1	31235.2			1.97003	2.05272			0.97822	1.03754									Mrps28	21980.9	31604.8	38258	5892.11	6760.04	6257.9	1.43783	1.74052	0.523894	0.799514	1.1473	1.06208	0.198247	0.0868942
	0.681172	1.16009	0.507006	0.437498					1291	Ankmy2	7485.86	15430.9	11464.1			2.06134	1.53143			1.04358	0.614882									Gm5464	22951.5	36801.4	51289.9	4620.92	6566.78	6257.9	1.60344	2.23471	0.681172	1.16009	1.4211	1.35425	0.507006	0.437498
	0.99927	0.904844	0.231041	0.194942					1292	Ankra2	10118.6	16440.2	18989.4			1.62475	1.87669			0.700217	0.908188									Trim33	17836.4	35654.7	33395.8	5466.95	6416.46	6257.9	1.99899	1.87234	0.99927	0.904844	1.17368	1.14468	0.231041	0.194942
	1.47444	1.51485	0.065814	0.252751					1293	Ankrd10	35801.6	53881.4	55632.4			1.505	1.55391			0.589765	0.635903									Mudeng	7709.19	21422	22030.5	5252.22	5497.37	6257.9	2.77876	2.85769	1.47444	1.51485	1.04668	1.19148	0.0658142	0.252751
	0.829491	1.28268	-0.30667	-0.05519					1294	Ankrd11	6515.23	4539.51	4114.87			0.696754	0.631577			-0.52128	-0.662969									Plk2	13391.2	23797	32579.7	6501.93	5256.86	6257.9	1.77706	2.43291	0.829491	1.28268	0.808508	0.962468	-0.306667	-0.0551894
	0.417132	0.574769	0.832317	0.26004					1295	Ankrd12	15156.4	18484.4	27197.7			1.21958	1.79447			0.286383	0.843557									Rbpms	25438.2	33966.9	37888.6	5222.16	9298.28	6253.6	1.33527	1.48944	0.417132	0.574769	1.78054	1.19751	0.832317	0.26004
	1.31267	0.989394	0.686111	0.649988					1296	Ankrd13a	7189.52	11904.9	13594.5			1.65587	1.89088			0.727593	0.919061									Tsnax	12137.1	30148.9	24096.5	3985.33	6412.16	6253.6	2.48401	1.98535	1.31267	0.989394	1.60894	1.56915	0.686111	0.649988
	0.601852	1.21636	0.356426	0.611634					1297	Ankrd13c	7485.86	11578.5	9647.19			1.54672	1.28872			0.629213	0.365941									Zdhhc13	18076.9	27434.6	42003.5	4092.7	5239.68	6253.6	1.51766	2.3236	0.601852	1.21636	1.28025	1.52799	0.356426	0.611634
	0.805788	1.43701	0.610417	0.990297					1298	Ankrd13d	6996.25	15843.2	21888.7			2.26452	3.12864			1.17921	1.64553									Utp6	12721.2	22238	34443.8	3147.9	4805.9	6253.6	1.7481	2.70758	0.805788	1.43701	1.5267	1.98659	0.610417	0.990297
	0.773857	1.32666	0.474557	0.947634					1299	Ankrd16	7339.84	14005	13238			1.90809	1.80359			0.932127	0.850869									P4hb	14611	24982.3	36647.3	3242.38	4505.26	6253.6	1.70983	2.50821	0.773857	1.32666	1.38949	1.92871	0.474557	0.947634
	0.829972	0.957582	0.747002	0.483222					1300	Ankrd17	16569.4	30715.8	33597.7			1.85377	2.02769			0.890459	1.01984									Rc3h2	17059	30325	33129.5	4470.62	7503.05	6249.31	1.77765	1.94205	0.829972	0.957582	1.6783	1.39786	0.747002	0.483222
	0.795226	1.0412	0.982414	0.755435					1301	Ankrd24	3702.13	5209.48	7061.43			1.40716	1.9074			0.492784	0.931605									Bach1	18081.2	31377.2	37210	3701.89	7314.08	6249.31	1.73535	2.05794	0.795226	1.0412	1.97577	1.68814	0.982414	0.755435
	0.99977	1.11429	1.20838	0.987342					1302	Ankrd26	10097.1	28465.3	27120.4			2.81916	2.68595			1.49526	1.42543									Stx2	15963.8	31922.6	34559.8	3152.19	7284.01	6249.31	1.99968	2.16488	0.99977	1.11429	2.31078	1.98253	1.20838	0.987342
	0.536757	0.960739	0.980378	1.05577					1303	Ankrd27	19215	34636.8	41535.3			1.80259	2.16161			0.850074	1.11211									Ccdc85b	23106.1	33520.2	44971.5	3006.18	5931.14	6249.31	1.45071	1.94631	0.536757	0.960739	1.97298	2.07882	0.980378	1.05577
	1.08205	1.06872	0.921583	1.03937					1304	Ankrd28	11982.5	14902.6	14926.1			1.2437	1.24565			0.314635	0.316903									Suv420h2	15882.2	33623.3	33314.2	3040.53	5759.35	6249.31	2.11704	2.09758	1.08205	1.06872	1.89419	2.05534	0.921583	1.03937
	0.613282	0.310479	0.312753	0.11474					1305	Ankrd32	8018.42	16023.6	18340.8			1.99834	2.28734			0.998805	1.19367									Gm13212	11900.9	18205.3	14758.6	5767.57	7163.76	6245.01	1.52974	1.24012	0.613282	0.310479	1.24208	1.08278	0.312753	0.11474
	1.31422	1.58484	0.687604	0.669934					1306	Ankrd33b	3861.04	9375.35	10476.2			2.42819	2.71331			1.27988	1.44005									Pitpna	15061.9	37454.2	45182	3925.21	6321.97	6245.01	2.48668	2.99975	1.31422	1.58484	1.61061	1.591	0.687604	0.669934
	1.03588	0.939042	0.849758	0.921021					1307	Ankrd35	3014.96	8791.27	9415.24			2.91588	3.12284			1.54393	1.64286									Zfp397	18742.6	38429.1	35934.3	3298.21	5944.03	6245.01	2.05036	1.91725	1.03588	0.939042	1.8022	1.89345	0.849758	0.921021
	0.744819	1.02074	0.658358	0.817736					1308	Ankrd37	9409.94	16672.1	19620.8			1.77175	2.08512			0.825175	1.06013									Klf13	16135.6	27039.5	32738.6	3542.99	5591.85	6245.01	1.67576	2.02896	0.744819	1.02074	1.57829	1.76264	0.658358	0.817736
	0.551964	0.449785	0.678916	-0.4049					1309	Ankrd39	10853	27052.4	28353.1			2.49262	2.61247			1.31766	1.38541									Rfwd3	33271.9	48779.3	45444	8262.69	13228	6240.72	1.46608	1.36584	0.551964	0.449785	1.60094	0.755289	0.678916	-0.404899
	0.366216	0.651478	0.603178	-0.40565					1310	Ankrd40	7391.38	18256.8	21910.2			2.47001	2.96429			1.30452	1.56769									Zfand5	31386.5	40456.2	49301.2	8266.99	12558	6240.72	1.28897	1.57078	0.366216	0.651478	1.51906	0.754896	0.603178	-0.40565
	0.889828	1.20145	0.860385	0.948486					1311	Ankrd42	8121.49	14275.6	16163.1			1.75776	1.99017			0.813737	0.992889									Mrps23	12592.4	23333.2	28958.8	3233.79	5871.02	6240.72	1.85296	2.2997	0.889828	1.20145	1.81552	1.92985	0.860385	0.948486
	0.851458	0.896031	0.611795	-0.02641					1312	Ankrd44	4775.83	8443.4	7637			1.76794	1.59909			0.822073	0.677255									Hnrnpc	19275.1	34778.6	35869.8	6351.62	9706.29	6236.42	1.80432	1.86094	0.851458	0.896031	1.52816	0.981863	0.611795	-0.0264065
	1.18694	1.30696	0.236213	-0.11163					1313	Ankrd45	5265.44	6686.86	10300.1			1.26995	1.95617			0.344775	0.968028									Mapre1	15813.5	36002.6	39125.7	6738.13	7936.82	6236.42	2.2767	2.47419	1.18694	1.30696	1.1779	0.925542	0.236213	-0.11163
	0.047015	-0.281905	0.30515	0.516734					1314	Ankrd46	11480	21018.3	26317.2			1.83086	2.29243			0.872519	1.19688									Gm10354	5441.53	5621.78	4475.68	4358.96	5385.7	6236.42	1.03312	0.822504	0.0470146	-0.281905	1.23555	1.43071	0.30515	0.516734
	1.16015	1.20057	0.637794	-0.06875					1315	Ankrd50	11961.1	23951.6	29418.3			2.00246	2.45951			1.00178	1.29837									Mlec	19438.3	43441	44675.2	6536.29	10170.1	6232.13	2.23481	2.2983	1.16015	1.20057	1.55595	0.953466	0.637794	-0.0687467
	0.822874	0.947858	0.536608	0.048707					1316	Ankrd52	6618.31	15151.7	16231.9			2.28937	2.45257			1.19495	1.29429									Smarcc1	20207.1	35744.9	38979.6	6025.24	8739.96	6232.13	1.76893	1.92901	0.822874	0.947858	1.45056	1.03434	0.536608	0.0487066
	0.87926	0.612379	0.47698	0.150964					1317	Ankrd54	5467.3	14623.5	16622.7			2.67472	3.04039			1.41939	1.60426									Ddx19a	17711.8	32579.7	27077.4	5612.96	7812.27	6232.13	1.83943	1.52878	0.87926	0.612379	1.39183	1.11031	0.47698	0.150964
	0.337214	0.566351	1.3314	1.04153					1318	Ankrd6	5308.39	16676.4	13427			3.14151	2.5294			1.65146	1.33879									Nol7	22930	28967.8	33954.2	3027.65	7619.01	6232.13	1.26331	1.48077	0.337214	0.566351	2.51648	2.05841	1.33141	1.04153
	0.775805	0.967828	0.859758	0.973578					1319	Ankrd60	3302.71	3727.81	6906.8			1.12871	2.09125			0.174678	1.06437									Minpp1	17832.1	30531.1	34877.6	3173.66	5759.35	6232.13	1.71215	1.95589	0.775805	0.967828	1.81473	1.9637	0.859758	0.973578
	0.618614	0.889525	0.575132	0.899381					1320	Ankrd9	19309.5	32154.5	35496.2			1.66522	1.83828			0.73571	0.878353									Pex6	13876.5	21306	25707.2	3341.15	4977.69	6232.13	1.5354	1.85257	0.618614	0.889525	1.48981	1.86526	0.575132	0.899381
	0.704467	0.732587	0.453354	-0.35364					1321	Anks1	6145.88	15126	20119.1			2.46116	3.27359			1.29934	1.71087									2810428I15Rik	26829.7	43720.1	44580.7	7957.78	10896	6227.83	1.62954	1.66162	0.704467	0.732587	1.36922	0.782609	0.453354	-0.353636
	0.626506	1.19589	1.07768	0.66596					1322	Anks3	14044	27589.2	26867			1.96448	1.91305			0.974147	0.935875									Ttc19	20808.4	32124.4	47669	3925.21	8284.7	6227.83	1.54382	2.29085	0.626506	1.19589	2.11064	1.58662	1.07768	0.66596
	0.606701	0.930839	0.436547	0.02932					1323	Ankzf1	9087.83	19248.9	21845.8			2.1181	2.40385			1.08277	1.26535									Gm17658	11673.3	17775.8	22253.8	6102.54	8258.94	6227.83	1.52277	1.90638	0.606701	0.930839	1.35336	1.02053	0.436547	0.0293197
	0.631954	0.735451	0.538436	0.636275					1324	Anln	27881.9	46374.3	50942			1.66324	1.82706			0.733994	0.869524									Foxred1	20048.2	31067.9	33378.6	4006.81	5819.48	6227.83	1.54966	1.66492	0.631954	0.735451	1.4524	1.55431	0.538436	0.636275
	1.07678	1.36141	0.27593	0.633189					1325	Ano10	7095.03	8456.28	12714			1.19186	1.79196			0.253214	0.84154									Flot2	17003.2	35865.1	43687.2	4015.39	4861.73	6227.83	2.10932	2.56936	1.07678	1.36141	1.21077	1.55099	0.27593	0.633189
	0.783423	0.99446	0.845913	0.209845					1326	Ano6	12841.5	30243.3	30591			2.35513	2.3822			1.2358	1.25229									Mreg	20168.5	34714.1	40182.3	5381.06	9671.93	6223.54	1.72121	1.99234	0.783423	0.99446	1.7974	1.15656	0.845913	0.209845
	0.516138	0.504095	0.369174	-0.04877					1327	Ano8	5123.71	9242.22	9638.6			1.80381	1.88118			0.851051	0.911635									Nop58	26318.6	37638.8	37325.9	6437.51	8314.77	6223.54	1.43012	1.41823	0.516138	0.504095	1.29161	0.966762	0.369174	-0.0487673
	0.859962	0.963433	0.616507	0.260226					1328	Ano9	10728.5	18355.6	21807.1			1.71093	2.03264			0.774778	1.02336									Luzp1	28281.3	51330.4	55147.1	5196.39	7966.89	6223.54	1.81499	1.94994	0.859962	0.963433	1.53316	1.19767	0.616507	0.260226
	0.887177	1.07917	0.227155	-0.00579					1329	Anp32a	9478.66	23401.9	22945.4			2.4689	2.42074			1.30387	1.27545									Ints3	20331.7	37604.5	42957.1	6248.55	7314.08	6223.54	1.84955	2.11282	0.887177	1.07917	1.17052	0.995997	0.227155	-0.00578602
	0.794173	1.2027	0.292126	0.344933					1330	Anp32b	23123.3	45068.7	38348.2			1.94906	1.65842			0.962779	0.729814									Nufip1	11226.6	19467.9	25840.4	4900.07	5999.86	6223.54	1.73408	2.3017	0.794173	1.2027	1.22444	1.27009	0.292126	0.344933
	0.340576	0.694594	0.231013	0.295223					1331	Anp32b-ps1	5055	9985.2	9819			1.97531	1.94243			0.98208	0.957865									Pdlim7	24514.8	31042.2	39675.5	5071.85	5952.62	6223.54	1.26626	1.61843	0.340576	0.694594	1.17366	1.22707	0.231013	0.295223
	0.511266	0.612045	0.944647	0.662393					1332	Anp32e	14460.6	28967.8	26390.2			2.00322	1.82497			1.00232	0.86787									Rpl36a	19528.5	27834	29847.9	3929.5	7563.18	6219.24	1.4253	1.52842	0.511266	0.612045	1.92472	1.58271	0.944647	0.662393
	1.17816	1.32532	1.07509	0.796114					1333	Anpep	6364.91	11230.7	13732			1.76447	2.15745			0.819232	1.10933									Rab7	17608.7	39846.3	44125.4	3581.65	7546	6219.24	2.26287	2.50588	1.17815	1.32532	2.10685	1.73642	1.07509	0.796114
	0.717196	0.680768	0.76377	0.525603					1334	Anubl1	14752.7	41834.8	47102			2.83574	3.19277			1.50372	1.67481									C330006D17Rik	23140.5	38042.5	37094	4320.31	7335.55	6219.24	1.64398	1.60299	0.717196	0.680768	1.69792	1.43954	0.76377	0.525603
	1.0251	0.865898	0.351457	0.427216					1335	Anxa11	13919.5	21606.7	30904.5			1.55226	2.22023			0.634371	1.15071									Hdlbp	15152.1	30836	27614.3	4625.22	5901.08	6219.24	2.0351	1.82247	1.0251	0.865898	1.27585	1.34464	0.351457	0.427216
	1.16438	1.26433	0.898164	0.982349					1336	Anxa2	3139.51	7696.12	6876.74			2.45138	2.19039			1.29359	1.13119									Ap2b1	14533.6	32575.4	34912	3147.9	5866.72	6219.24	2.24138	2.40215	1.16438	1.26433	1.86369	1.97568	0.898164	0.982349
	0.90668	0.942391	0.817488	0.261813					1337	Anxa4	7481.57	19480.8	16442.3			2.60384	2.19771			1.38064	1.136									Cadm1	23527	44106.7	45212.1	5183.51	9135.08	6214.95	1.87473	1.92171	0.90668	0.942391	1.76233	1.19898	0.817488	0.261813
	0.725208	0.711641	0.824685	0.327848					1338	Anxa5	5497.36	5793.56	6692.04			1.05388	1.21732			0.0757112	0.283707									Zfp1	20804.1	34392	34070.1	4951.6	8770.02	6214.95	1.65314	1.63767	0.725208	0.711641	1.77115	1.25514	0.824685	0.327848
	0.383115	0.817632	0.380549	0.204403					1339	Anxa6	7399.97	17294.8	17675.1			2.33714	2.38853			1.22475	1.25612									Elp2	16208.6	21138.6	28567.9	5393.94	7022.03	6214.95	1.30415	1.76251	0.383115	0.817632	1.30184	1.15221	0.380549	0.204403
	0.844573	0.995816	-0.19187	-0.31956					1340	Anxa7	11351.2	20322.6	21463.5			1.79035	1.89086			0.840239	0.919041									Luc7l2	23595.7	42371.6	47054.8	7755.94	6790.11	6214.95	1.79573	1.99421	0.844573	0.995816	0.875472	0.801315	-0.191867	-0.319559
	1.43449	1.32043	0.368903	0.264206					1341	Aoc2	3672.07	5780.68	6434.32			1.57423	1.75223			0.654646	0.809194									Stip1	14254.5	38527.8	35599.2	5174.92	6682.74	6214.95	2.70286	2.49741	1.43448	1.32043	1.29137	1.20098	0.368903	0.264206
	1.13423	1.55985	0.366978	0.699744					1342	Aox1	6446.52	7713.3	9591.35			1.19651	1.48783			0.258828	0.573213									Ccdc117	10964.7	24067.5	32326.2	3826.43	4934.75	6214.95	2.19501	2.94822	1.13423	1.55985	1.28965	1.62422	0.366978	0.699744
	1.09684	1.12813	-0.10988	0.408911					1343	Ap1ar	16801.3	30243.3	38945.3			1.80006	2.31799			0.848044	1.21287									Inca1	14469.2	30947.7	31626.1	4681.05	4337.77	6214.95	2.13886	2.18575	1.09684	1.12813	0.926666	1.32768	-0.109879	0.408911
	0.847549	1.23416	0.745898	0.344473					1344	Ap1b1	9800.77	21104.2	25724.4			2.15332	2.62473			1.10656	1.39217									Gm20518	18377.5	33069.3	43231.9	4891.48	8203.1	6210.65	1.79944	2.35244	0.847549	1.23416	1.67702	1.26969	0.745898	0.344473
	0.892683	0.650713	0.761559	0.413217					1345	Ap1g1	13764.9	26554.2	19504.8			1.92913	1.417			0.947947	0.502841									Gtl3	18188.5	33769.3	28555	4663.87	7906.76	6210.65	1.85663	1.56994	0.892683	0.650713	1.69532	1.33165	0.761559	0.413217
	0.454045	0.647815	0.972446	0.649401					1346	Ap1g2	7528.81	16891.1	12473.5			2.24353	1.65677			1.16577	0.72837									Dck	27203.3	37265.2	42622	3959.57	7769.33	6210.65	1.36988	1.56679	0.454045	0.647815	1.96217	1.56852	0.972446	0.649401
	0.227158	0.562045	0.865514	0.705234					1347	Ap1m1	10311.9	18952.5	14221.7			1.83794	1.37916			0.878089	0.463787									Wdr43	18407.6	21546.6	27176.2	3809.26	6940.43	6210.65	1.17053	1.47636	0.227158	0.562045	1.82199	1.63041	0.865514	0.705234
	1.10386	1.37177	0.067285	0.749834					1348	Ap1s1	5802.29	13137.5	12696.8			2.2642	2.18825			1.179	1.12978									Syvn1	8800.07	18913.9	22773.5	3693.3	3869.63	6210.65	2.14929	2.58788	1.10386	1.37177	1.04774	1.6816	0.0672852	0.749834
	0.765745	1.07071	0.425234	0.172975					1349	Ap1s2	9766.41	20412.8	23327.6			2.0901	2.38856			1.06357	1.25614									Kank2	20821.3	35401.3	43734.5	5501.3	7387.09	6202.06	1.70025	2.10047	0.765745	1.07071	1.34279	1.12738	0.425234	0.172975
	0.330846	0.591618	1.22718	0.580645					1350	Ap1s3	6635.49	12119.7	21334.6			1.82649	3.21523			0.869076	1.68492									5730405O15Rik	23458.3	29504.7	35350.1	4144.23	9701.99	6197.77	1.25775	1.50694	0.330846	0.591618	2.34108	1.49552	1.22718	0.580645
	0.864825	1.01131	1.01776	0.567253					1351	Ap2a1	8237.45	18308.3	16072.9			2.22257	1.9512			1.15223	0.964362									Ppa1	24351.6	44347.2	49086.4	4182.88	8469.38	6197.77	1.82112	2.01574	0.864825	1.01131	2.02477	1.4817	1.01776	0.567253
	1.00781	1.13471	0.986491	0.589644					1352	Ap2a2	24974.3	49676.9	48721.3			1.98912	1.95085			0.992128	0.964106									Acadm	18519.2	37239.4	40663.4	4118.46	8160.15	6197.77	2.01085	2.19574	1.00781	1.13471	1.98136	1.50488	0.986491	0.589644
	1.41336	1.40301	0.748474	0.796326					1353	Ap2b1	14533.6	32575.4	34912			2.24138	2.40215			1.16438	1.26433									9430037G07Rik	10406.3	27718.1	27519.8	3568.76	5995.57	6197.77	2.66357	2.64453	1.41336	1.40301	1.68001	1.73667	0.748474	0.796326
	0.799094	0.955125	0.32052	0.586638					1354	Ap2m1	11750.6	26279.3	28207.1			2.23642	2.40048			1.16119	1.26332									D230037D09Rik	17050.4	29667.8	33056.4	4127.05	5153.78	6197.77	1.74001	1.93875	0.799094	0.955125	1.24878	1.50174	0.32052	0.586638
	0.835756	0.876166	0.076645	0.390431					1355	Ap2s1	8486.55	14949.9	13040.5			1.7616	1.5366			0.816884	0.619745									Uhrf2	16427.7	29320	30152.8	4728.29	4986.28	6197.77	1.78479	1.83549	0.835756	0.876166	1.05456	1.31078	0.0766454	0.390431
	0.221346	0.615109	0.699287	0.018296					1356	Ap3b1	19537.1	25115.5	30530.8			1.28553	1.56271			0.362359	0.644049									Mknk2	22762.5	26537	34864.8	6115.42	9929.62	6193.47	1.16582	1.53167	0.221346	0.615109	1.6237	1.01276	0.699287	0.0182963
	0.898488	0.563786	0.960565	0.426595					1357	Ap3b2	5059.29	9396.82	9810.41			1.85734	1.93909			0.893238	0.955378									Clcn3	22921.4	42728.1	33881.1	4608.04	8967.58	6193.47	1.86411	1.47814	0.898488	0.563786	1.94607	1.34406	0.960565	0.426595
	0.658223	0.870867	0.155713	0.591655					1358	Ap3d1	14323.2	20348.3	23705.6			1.42065	1.65505			0.506556	0.726875									Cad	19365.3	30561.2	35414.6	4109.87	4578.28	6193.47	1.57814	1.82876	0.658223	0.870867	1.11397	1.50697	0.155713	0.591655
	0.911683	0.979106	0.932213	0.420226					1359	Ap3m1	12699.8	26695.9	34426.6			2.10208	2.71081			1.07182	1.43872									2500003M10Rik	15122	28448.2	29809.2	4625.22	8825.85	6189.18	1.88124	1.97124	0.911683	0.979106	1.9082	1.33814	0.932213	0.420226
	0.717177	0.938875	0.830801	0.530133					1360	Ap3m2	4586.86	11411	6554.59			2.48777	1.42899			1.31485	0.514999									Cited2	20086.8	33022	38507.2	4285.95	7623.3	6189.18	1.64396	1.91703	0.717177	0.938875	1.77867	1.44406	0.830801	0.530133
	0.698925	0.29396	0.536408	0.329636					1361	Ap3s1	8280.4	18699.2	15677.8			2.25824	1.89336			1.1752	0.920947									Gm16091	26430.3	42904.2	32403.6	4921.54	7137.99	6184.88	1.62329	1.226	0.698925	0.29396	1.45036	1.2567	0.536408	0.329636
	0.778994	0.80285	0.974872	0.886545					1362	Ap3s2	9362.7	17883.2	18199.1			1.91004	1.94379			0.933606	0.958869									Fam35a	19975.2	34276.1	34847.6	3345.45	6575.37	6184.88	1.71593	1.74454	0.778994	0.80285	1.96547	1.84874	0.974872	0.886545
	0.962779	0.729814	0.00248	-0.33234					1363	Ap4b1	12399.1	15800.2	17361.5			1.2743	1.40022			0.349708	0.485654									Anp32b	23123.3	45068.7	38348.2	7781.71	7795.1	6180.59	1.94906	1.65842	0.962779	0.729814	1.00172	0.794246	0.00248031	-0.332343
	1.98066	0.443396	1.69478	0.008222					1364	Ap4e1	8194.51	17599.7	17597.8			2.14775	2.1475			1.10282	1.10266									Coil	10986.1	43359.4	14939	6141.19	19880.7	6176.29	3.94674	1.3598	1.98066	0.443396	3.23727	1.00572	1.69478	0.00822226
	0.766542	0.83355	0.94757	0.596719					1365	Ap4m1	12601	24454.1	27721.7			1.94065	2.19996			0.956538	1.13748									Tmem87a	16775.5	28538.3	29895.1	4084.11	7876.7	6176.29	1.70119	1.78206	0.766542	0.83355	1.92862	1.51227	0.94757	0.596719
	0.828863	1.4801	0.877531	0.632593					1366	Ap4s1	9006.23	14249.9	16399.4			1.58222	1.82089			0.661952	0.864644									Lig3	14151.4	25136.9	39477.9	3981.04	7314.08	6172	1.77629	2.78968	0.828863	1.4801	1.83723	1.55035	0.877531	0.632593
	1.09451	0.896771	0.768149	0.370371					1367	Apaf1	15534.3	34263.2	38657.5			2.20564	2.48852			1.1412	1.31529									1700122E12Rik	16582.3	35409.9	30874.4	4771.23	8125.8	6167.7	2.1354	1.86189	1.09451	0.896771	1.70308	1.29269	0.768149	0.370371
	0.931521	1.31069	0.568115	0.482388					1368	Apba3	6742.86	17054.3	15304.1			2.52924	2.26967			1.3387	1.18248									Bicd1	19975.2	38098.4	49550.3	4414.79	6545.3	6167.7	1.90729	2.48059	0.931521	1.31069	1.48258	1.39705	0.568115	0.482388
	1.09899	1.35596	0.614284	0.579622					1369	Apbb2	16977.4	30230.5	34027.2			1.78063	2.00426			0.832387	1.00307									Sertad2	13812.1	29586.3	35354.4	4127.05	6317.68	6167.7	2.14205	2.55967	1.09899	1.35596	1.5308	1.49446	0.614284	0.579622
	0.702007	0.789646	0.94359	1.0042					1370	Apbb3	15998.2	25433.3	21265.9			1.58976	1.32927			0.668809	0.410635									Zfyve21	16054	26116.1	27751.8	3074.89	5913.96	6167.7	1.62677	1.72865	0.702007	0.789646	1.92331	2.00583	0.94359	1.0042
	0.496111	0.680801	0.74398	0.021443					1371	Apc	21731.8	32038.5	34980.7			1.47427	1.60966			0.560003	0.686755									Ckap2	30355.8	42814	48661.2	6072.48	10170.1	6163.41	1.41041	1.60303	0.496111	0.680801	1.67479	1.01497	0.74398	0.0214429
	1.11034	1.29479	0.96955	1.00319					1372	Apc2	5072.18	4341.95	7430.83			0.856032	1.46502			-0.224263	0.550917									Ubr2	11505.8	24840.6	28228.5	3074.89	6021.34	6163.41	2.15896	2.45342	1.11034	1.29479	1.95823	2.00443	0.96955	1.00319
	0.749192	0.738285	0.256937	0.619731					1373	Apcdd1	9775	17947.6	22812.2			1.83607	2.33373			0.876622	1.22264									Haus8	22341.6	37552.9	37270.1	4011.1	4793.02	6163.41	1.68085	1.66819	0.749192	0.738285	1.19494	1.53659	0.256937	0.619731
	0.733029	0.792108	0.86846	-0.15243					1374	Apeh	9581.73	24836.3	23920.4			2.59205	2.49646			1.37409	1.31988									Papd5	32125.2	53396.1	55628.1	6845.5	12497.9	6159.11	1.66213	1.7316	0.733029	0.792108	1.82571	0.899731	0.86846	-0.152434
	0.953187	0.805001	0.248829	-0.46309					1375	Apex1	19399.7	30754.4	32012.7			1.58531	1.65017			0.664761	0.722611									Rhob	21538.5	41701.6	37630.9	8490.3	10088.5	6159.11	1.93614	1.74715	0.953187	0.805001	1.18824	0.725429	0.248829	-0.463094
	0.631301	0.371984	0.299289	-0.26805					1376	Aph1a	3972.7	11776.1	12748.4			2.96425	3.209			1.56767	1.68212									Rad23a	28311.4	43853.3	36638.7	7416.67	9126.49	6159.11	1.54896	1.29413	0.631301	0.371984	1.23054	0.830441	0.299289	-0.26805
	0.544048	0.684146	0.68519	0.283878					1377	Aph1b	3620.53	6192.97	7795.93			1.71051	2.15326			0.774431	1.10652									Rell1	23110.4	33696.3	37132.7	5058.97	8134.39	6159.11	1.45806	1.60675	0.544048	0.684146	1.60791	1.21746	0.68519	0.283878
	0.473267	0.840459	0.479931	0.234521					1378	Aph1c	4805.9	9882.13	13663.3			2.05625	2.84302			1.04002	1.50742									Csrp2	23239.2	32261.9	41612.6	5235.04	7301.19	6159.11	1.38825	1.79062	0.473267	0.840459	1.39468	1.17652	0.479931	0.234521
	0.826548	1.26094	0.395028	0.818891					1379	Api5	11669	24527.1	25715.8			2.1019	2.20377			1.07169	1.13997									Ptpn1	13992.5	24814.8	33533.2	3491.46	4591.16	6159.11	1.77344	2.39651	0.826548	1.26094	1.31497	1.76405	0.395028	0.818891
	0.823315	1.17383	0.296147	0.098057					1380	Apip	9392.76	18755	21167.1			1.99675	2.25356			0.997654	1.1722									Tada2a	20142.7	35641.8	45444	5750.39	7060.68	6154.82	1.76947	2.25611	0.823315	1.17383	1.22786	1.07033	0.296147	0.0980569
	0.204776	0.488922	0.601083	0.631688					1381	Apitd1	11660.4	15138.9	23877.4			1.29831	2.04773			0.376636	1.03403									Gm13247	10586.7	12201.3	14857.4	3972.45	6025.63	6154.82	1.15251	1.4034	0.204776	0.488922	1.51685	1.54938	0.601083	0.631688
	0.71224	1.00816	0.102924	0.333981					1382	Aplf	4174.56	10109.8	11300.9			2.42175	2.70708			1.27605	1.43674									Trim41	13515.8	22143.5	27184.8	4882.89	5243.97	6154.82	1.63835	2.01134	0.71224	1.00816	1.07395	1.26049	0.102924	0.333981
	0.369908	0.103046	0.487303	0.825003					1383	Apln	3431.56	3173.79	4329.64			0.924883	1.26171			-0.112658	0.335382									Gm13233	12665.4	16367.1	13603.1	3474.28	4870.32	6154.82	1.29227	1.07404	0.369908	0.103046	1.40182	1.77154	0.487303	0.825003
	0.997621	0.991933	0.783175	0.385956					1384	Aplp1	8684.11	13734.5	20037.5			1.58156	2.30737			0.661352	1.20625									Ergic2	18514.9	36968.9	36823.4	4706.82	8100.03	6150.52	1.9967	1.98885	0.997621	0.991933	1.72091	1.30673	0.783175	0.385956
	0.833616	1.30797	0.231471	0.509574					1385	Aplp2	24854.1	39378.2	45602.9			1.58437	1.83483			0.663914	0.875644									Snrnp25	13408.4	23895.8	33198.2	4320.31	5072.18	6150.52	1.78215	2.47592	0.833616	1.30797	1.17403	1.42363	0.231471	0.509574
	0.668806	0.848337	0.16699	0.432125					1386	Apoa1bp	21585.7	35169.4	32764.4			1.62929	1.51787			0.704241	0.602049									Fam160a2	14898.7	23685.3	26824	4552.21	5110.83	6141.93	1.58976	1.80042	0.668806	0.848337	1.12271	1.34922	0.16699	0.432125
	1.33233	1.56914	0.318015	0.609061					1387	Apobec1	8877.38	14099.5	12297.4			1.58825	1.38525			0.667441	0.470145									Ppp3r1	14555.1	36651.1	43189	4023.98	5016.35	6137.64	2.51808	2.96727	1.33233	1.56914	1.24661	1.52527	0.318015	0.609061
	0.666126	0.279554	0.172426	-0.21962					1388	Apobec2	3757.96	10990.2	8440.22			2.9245	2.24596			1.54819	1.16733									Cox4i1	24158.3	38334.6	29323.8	7141.82	8048.49	6133.34	1.58681	1.21382	0.666126	0.279554	1.12695	0.858792	0.172426	-0.219619
	0.814601	0.808803	0.762004	0.405813					1389	Apobec3	6180.24	8082.64	8500.35			1.30782	1.37541			0.387164	0.459859									Cenpn	17097.7	30071.6	29951	4629.51	7850.93	6133.34	1.75881	1.75176	0.814601	0.808803	1.69584	1.32484	0.762004	0.405813
	0.447465	1.13746	0.561696	0.489849					1390	Apoc1	6906.06	19407.8	15656.3			2.81026	2.26704			1.4907	1.18081									A630055G03Rik	20194.2	27537.7	44426	4367.55	6446.52	6133.34	1.36364	2.19994	0.447465	1.13746	1.476	1.4043	0.561696	0.489849
	0.688278	0.821165	9.35e-05	0.358419					1391	Apoe	30768	23891.5	42424.4			0.776503	1.37885			-0.364937	0.463463									Gng5	17484.2	28173.3	30891.6	4784.12	4784.43	6133.34	1.61136	1.76683	0.688278	0.821165	1.00006	1.28202	9.34803e-05	0.358419
	0.703184	0.959745	0.328882	0.841517					1392	Apoh	3169.57	3702.04	3917.29			1.16799	1.23591			0.224033	0.305569									Mrpl9	16792.7	27340.1	32661.3	3422.75	4299.11	6133.34	1.62809	1.94497	0.703184	0.959745	1.25604	1.79193	0.328882	0.841517
	1.00305	1.29888	1.51633	0.950455					1393	Apol7d	18802.7	34185.9	34095.9			1.81814	1.81335			0.862461	0.858658									Anapc13	13030.5	26116.1	32059.9	3169.37	9066.36	6124.75	2.00424	2.46038	1.00305	1.29888	2.86062	1.93248	1.51633	0.950455
	0.925093	0.898734	0.893388	0.429444					1394	Apoo	4664.17	7979.57	14165.8			1.71082	3.03716			0.774691	1.60272									Rtn3	22079.6	41925	41165.9	4547.92	8447.91	6124.75	1.89881	1.86443	0.925093	0.898734	1.85753	1.34671	0.893388	0.429444
	1.01906	1.0352	0.605463	0.437642					1395	App	6811.58	11630.1	20952.4			1.7074	3.07599			0.771798	1.62105									Trmt112	15633.1	31682.1	32038.5	4522.15	6880.3	6124.75	2.0266	2.0494	1.01906	1.0352	1.52147	1.35439	0.605463	0.437642
	0.797416	0.878536	0.560359	0.627745					1396	Appbp2	25141.8	47284.8	59094.4			1.88072	2.35044			0.911285	1.23293									Jtb	18115.5	31484.5	33305.6	3963.86	5845.25	6124.75	1.73799	1.83851	0.797416	0.878536	1.47464	1.54515	0.560359	0.627745
	0.99875	0.602524	1.57246	0.893839					1397	Appl1	3388.61	5166.54	4583.06			1.52468	1.35249			0.608505	0.435618									Mphosph6	20404.7	40774	30981.8	3293.91	9796.48	6120.46	1.99827	1.51837	0.99875	0.602524	2.97412	1.85811	1.57246	0.893839
	0.885771	0.594971	0.391226	0.226795					1398	Appl2	11724.8	25227.1	22030.5			2.1516	1.87896			1.10541	0.909932									Lmnb1	16084.1	29719.4	24294.1	5226.45	6854.53	6116.16	1.84775	1.51044	0.885771	0.594971	1.31151	1.17023	0.391226	0.226795
	0.589065	0.659312	0.60125	0.504363					1399	Aprt	19167.8	27559.2	29023.2			1.43779	1.51417			0.52385	0.598524									Nup133	15950.9	23994.5	25191.8	4311.72	6541.01	6116.16	1.50427	1.57933	0.589065	0.659312	1.51703	1.4185	0.60125	0.504363
	0.827485	0.546171	0.808592	-0.02096					1400	Aptx	6210.3	9474.13	12095.5			1.52555	1.94765			0.609331	0.961736									Herpud1	23058.9	40920	33670.7	6201.31	10861.6	6111.87	1.77459	1.46021	0.827485	0.546171	1.7515	0.985577	0.808592	-0.0209592
	0.932465	1.1833	0.894391	0.375547					1401	Aqp11	11132.2	26472.6	27743.2			2.37803	2.49217			1.24977	1.3174									Tmem165	22973	43844.7	52170.4	4711.11	8757.13	6111.87	1.90853	2.27095	0.932465	1.1833	1.85883	1.29733	0.894391	0.375547
	0.660826	0.889648	1.44128	0.947418					1402	Aqp3	6656.96	19287.5	11481.3			2.89735	1.7247			1.53473	0.786347									Sumo3	20327.4	32137.3	37661	3169.37	8606.82	6111.87	1.58099	1.85272	0.660826	0.889648	2.71562	1.92842	1.44128	0.947418
	0.697763	1.02787	0.44826	0.798939					1403	Araf	3925.46	7524.33	13646.1			1.9168	3.4763			0.938701	1.79755									Psen1	17157.8	27829.7	34985	3512.93	4793.02	6111.87	1.62199	2.03902	0.697763	1.02787	1.36439	1.73982	0.44826	0.798939
	0.669094	0.918375	0.577532	0.771707					1404	Arap1	6794.4	12046.7	18998			1.77303	2.79613			0.826215	1.48343									Plk1	18158.5	28873.3	34319.2	3577.35	5338.46	6107.57	1.59007	1.88998	0.669094	0.918375	1.49229	1.70729	0.577532	0.771707
	1.0062	1.274	-0.41729	0.209438					1405	Arap2	5209.61	7507.15	4866.55			1.44102	0.934149			0.52709	-0.098276									Mmab	5948.32	11947.9	14384.9	5282.28	3955.53	6107.57	2.00861	2.41831	1.0062	1.274	0.74883	1.15624	-0.41729	0.209438
	0.60942	0.912521	0.580533	-0.26184					1406	Arc	32524.6	46069.3	38386.9			1.41645	1.18024			0.502275	0.239081									Ptpn2	31773	48474.4	59807.4	7317.9	10943.2	6103.28	1.52565	1.88233	0.60942	0.912521	1.4954	0.834021	0.580533	-0.261845
	0.687626	1.03871	1.02609	0.604045					1407	Arcn1	16264.5	29942.7	32785.8			1.84099	2.0158			0.880482	1.01135									Gk5	21091.8	33971.2	43330.7	4015.39	8177.33	6103.28	1.61063	2.05439	0.687626	1.03871	2.0365	1.51997	1.02609	0.604045
	0.939217	0.983309	0.432459	-0.34193					1408	Arf1	24218.5	43479.6	47179.3			1.79531	1.94807			0.844233	0.962047									Eed	21456.9	41143.3	42420.2	7730.17	10432.1	6098.98	1.91749	1.97699	0.939217	0.983309	1.34953	0.788984	0.432459	-0.341932
	1.44368	1.34781	1.3279	0.60921					1409	Arf2	11703.4	25910	34766			2.21389	2.97059			1.14658	1.57075									Thumpd3	17329.6	47138.7	44108.2	3998.22	10037	6098.98	2.72013	2.54525	1.44368	1.34781	2.51036	1.52542	1.3279	0.60921
	0.766027	1.0584	0.854769	0.60457					1410	Arf3	21061.8	43754.5	44847			2.07744	2.12931			1.0548	1.09038									1110008F13Rik	15220.8	25884.2	31699.1	4011.1	7253.95	6098.98	1.70058	2.08262	0.766027	1.0584	1.80847	1.52053	0.854769	0.60457
	0.330467	1.00922	0.294092	0.74904					1411	Arf4	17415.5	39167.8	34598.4			2.24902	1.98665			1.1693	0.990338									Usp11	18734	23556.5	37708.2	3628.89	4449.43	6098.98	1.25742	2.01283	0.330467	1.00922	1.22611	1.68067	0.294092	0.74904
	0.685246	0.943101	0.35489	1.01447					1412	Arf5	7661.95	15637	21948.9			2.04087	2.86466			1.02918	1.51836									C230037L18Rik	13180.8	21194.4	25342.1	3019.06	3861.04	6098.98	1.60798	1.92266	0.685246	0.943101	1.27889	2.02016	0.35489	1.01447
	0.604181	0.988582	0.983742	0.751444					1413	Arf6	21671.6	33507.3	33494.6			1.54614	1.54555			0.628669	0.628119									Tmem199	18008.2	27374.5	35732.4	3620.3	7159.46	6094.69	1.52012	1.98423	0.604181	0.988582	1.97759	1.68348	0.983742	0.751444
	0.486485	0.745521	1.09844	0.959083					1414	Arfgap1	14387.6	27619.3	28078.2			1.91965	1.95155			0.940847	0.964623									Zfp295	17797.7	24935.1	29839.3	3135.01	6712.8	6094.69	1.40103	1.67658	0.486485	0.745521	2.14124	1.94407	1.09844	0.959083
	1.02746	1.01126	0.948241	0.865353					1415	Arfgap2	11694.8	21379.1	24620.5			1.82809	2.10526			0.870334	1.074									Ccdc130	13060.5	26622.9	26325.8	3345.45	6455.11	6094.69	2.03842	2.01567	1.02745	1.01126	1.92952	1.82178	0.948241	0.865353
	1.17071	1.13256	0.199595	0.233623					1416	Arfgap3	8190.21	13373.7	15604.7			1.63289	1.90529			0.70743	0.930012									Ipp	18476.3	41594.3	40508.8	5183.51	5952.62	6094.69	2.25122	2.19247	1.17071	1.13256	1.14838	1.17578	0.199595	0.233623
	1.18547	1.41102	0.848258	0.568949					1417	Arfgef2	13421.3	20545.9	25556.9			1.53084	1.90421			0.614326	0.929189									Ncaph	12832.9	29186.8	34126	4105.58	7391.38	6090.39	2.27438	2.65925	1.18547	1.41102	1.80033	1.48344	0.848258	0.568949
	0.610211	0.43886	1.05221	0.822357					1418	Arfip1	3697.84	11213.5	8878.34			3.03244	2.40095			1.60048	1.26361									Mrpl15	23239.2	35474.3	31501.5	3444.22	7142.28	6090.39	1.52648	1.35553	0.610211	0.43886	2.0737	1.76829	1.05221	0.822357
	0.594187	0.853224	0.493764	0.472636					1419	Arfip2	9659.04	21263.1	21162.8			2.20137	2.19099			1.1384	1.13158									Atp13a3	17342.5	26180.5	31329.7	4389.02	6180.24	6090.39	1.50962	1.80653	0.594187	0.853224	1.40811	1.38764	0.493764	0.472636
	0.535144	0.694948	0.418751	0.511262					1420	Arfrp1	15852.2	18746.4	23843.1			1.18258	1.50409			0.241935	0.588891									Zfp64	22749.6	32966.2	36827.7	4273.07	5712.11	6090.39	1.44909	1.61883	0.535144	0.694948	1.33677	1.4253	0.418751	0.511262
	1.00822	1.44033	0.774814	1.00017					1421	Arglu1	16938.8	30050.1	24478.8			1.77404	1.44513			0.827041	0.531204									Stard5	13103.5	26356.6	35560.6	3044.83	5209.61	6090.39	2.01142	2.71383	1.00822	1.44033	1.71097	2.00024	0.774814	1.00017
	0.766903	0.741387	0.953151	0.416231					1422	Arhgap1	4754.36	8447.69	9707.32			1.77683	2.04177			0.829306	1.02982									Gm17690	19721.8	33558.9	32970.5	4560.8	8830.15	6086.1	1.70161	1.67178	0.766903	0.741387	1.9361	1.33444	0.953151	0.416231
	0.975086	0.955603	-0.13705	-0.51775					1423	Arhgap10	8568.15	12343	15119.4			1.44057	1.7646			0.526637	0.819342									Ifitm2	15323.9	30123.1	29719	8713.62	7923.94	6086.1	1.96576	1.93939	0.975086	0.955603	0.909374	0.698458	-0.137054	-0.517754
	0.719729	1.12219	0.451524	0.200841					1424	Arhgap11a	12369.1	22384	26987.2			1.80968	2.18183			0.855733	1.12554									Ncor1	13915.2	22916.6	30290.3	5295.17	7241.06	6086.1	1.64687	2.17678	0.719729	1.12219	1.36748	1.14937	0.451524	0.200841
	0.525134	1.16146	0.334821	0.554414					1425	Arhgap12	16002.5	28220.5	32992			1.76351	2.06168			0.81845	1.04382									Atp1b2	20275.8	29178.3	45353.8	4144.23	5226.79	6086.1	1.43907	2.23684	0.525134	1.16146	1.26122	1.46857	0.334821	0.554414
	1.15332	1.23714	1.10216	0.827535					1426	Arhgap17	15014.7	24733.2	30281.7			1.64727	2.01681			0.720078	1.01207									M6pr	10741.3	23891.5	25320.7	3427.04	7357.02	6081.8	2.22426	2.35731	1.15332	1.23714	2.14676	1.77465	1.10216	0.827535
	0.896826	1.13912	1.00201	0.90936					1427	Arhgap19	17935.1	29294.2	31849.5			1.63334	1.77581			0.707827	0.82848									Cenpm	15375.4	28628.5	33864	3238.08	6485.18	6081.8	1.86196	2.20247	0.896826	1.13912	2.00279	1.87821	1.00201	0.90936
	0.829102	0.725567	0.271974	0.315493					1428	Arhgap20	3036.43	4822.96	11133.4			1.58837	3.6666			0.667543	1.87444									Mrpl4	20245.8	35968.2	33477.4	4887.19	5901.08	6081.8	1.77658	1.65355	0.829102	0.725567	1.20746	1.24444	0.271974	0.315493
	0.966875	1.15547	0.276827	0.386961					1429	Arhgap21	15036.1	27061	28872.8			1.79973	1.92023			0.847778	0.941278									Zfp367	14868.6	29062.3	33120.9	4650.99	5634.8	6081.8	1.9546	2.22756	0.966875	1.15547	1.21153	1.30764	0.276827	0.386961
	0.970233	1.21808	-0.01355	0.276719					1430	Arhgap23	12704.1	25197.1	38279.5			1.98339	3.01317			0.987966	1.59128									Rpe	17265.2	33825.1	40165.1	5020.32	4973.4	6081.8	1.95916	2.32637	0.970233	1.21808	0.990654	1.21144	-0.0135469	0.276719
	0.825448	1.01031	0.342954	0.502422					1431	Arhgap26	5587.55	3659.09	6464.39			0.654865	1.15693			-0.610731	0.210298									Fam54a	18244.4	32330.6	36750.4	4290.24	5441.53	6077.51	1.77208	2.01434	0.825448	1.01031	1.26835	1.41659	0.342954	0.502422
	0.806004	0.625307	-0.02973	0.270775					1432	Arhgap27	9942.5	11415.3	17357.2			1.14814	1.74576			0.199293	0.803855									Vps4b	19511.3	34112.9	30097	5037.49	4934.75	6077.51	1.74836	1.54254	0.806004	0.625307	0.979605	1.20646	-0.0297281	0.270775
	0.431059	0.77967	0.039129	0.578019					1433	Arhgap28	10165.8	18055	26497.6			1.77604	2.60653			0.828667	1.38213									Ccl25	16500.7	22246.6	28327.3	4071.22	4183.15	6077.51	1.34822	1.71674	0.431059	0.77967	1.02749	1.4928	0.0391285	0.578019
	0.431059	0.77967	0.039129	0.578019					1434	Arhgap29	6863.11	9645.92	16721.5			1.40547	2.43643			0.491056	1.28477									Ccl25	16500.7	22246.6	28327.3	4071.22	4183.15	6077.51	1.34822	1.71674	0.431059	0.77967	1.02749	1.4928	0.0391285	0.578019
	0.979844	1.19822	-0.02239	0.544921					1435	Arhgap30	6274.72	3620.44	8307.06			0.576988	1.32389			-0.793386	0.404787									Golt1b	12403.4	24462.7	28460.5	4165.7	4101.55	6077.51	1.97225	2.29457	0.979844	1.19822	0.9846	1.45894	-0.0223897	0.544921
	0.925854	1.03908	0.971422	0.512998					1436	Arhgap39	7623.3	10268.6	14518			1.34701	1.90443			0.429759	0.929358									Gemin4	23716	45055.8	48734.2	4255.89	8344.83	6073.21	1.89981	2.05491	0.925854	1.03908	1.96077	1.42701	0.971422	0.512998
	0.814481	0.85727	0.55107	0.268523					1437	Arhgap4	19262.2	21924.5	25814.6			1.13821	1.34017			0.186768	0.422412									Ssbp1	18742.6	32961.9	33954.2	5041.79	7387.09	6073.21	1.75866	1.81161	0.814481	0.85727	1.46517	1.20457	0.55107	0.268523
	1.24537	1.62544	-0.0601	0.76428					1438	Arhgap42	7193.81	14902.6	12142.8			2.07159	1.68794			1.05074	0.755267									Actr2	10758.5	25506.3	33193.9	3573.06	3427.27	6068.92	2.3708	3.08536	1.24537	1.62544	0.959197	1.69852	-0.0601003	0.76428
	0.622247	0.730641	0.830081	0.480706					1439	Arhgap44	11827.9	23165.7	31785			1.95856	2.68729			0.969791	1.42615									Alad	21852	33636.2	36260.7	4346.07	7726.38	6064.62	1.53927	1.65938	0.622247	0.730641	1.77779	1.39543	0.830081	0.480706
	0.792535	0.83895	1.20301	0.942096					1440	Arhgap8	4500.97	5681.9	6017.68			1.26237	1.33697			0.336137	0.418971									Cep250	20941.5	36273.1	37459.1	3156.49	7266.83	6064.62	1.73211	1.78875	0.792535	0.83895	2.30219	1.92132	1.203	0.942096
	1.54857	1.61257	1.1627	0.961861					1441	Arhgdia	13996.8	26773.2	30994.7			1.91281	2.21441			0.935694	1.14692									Kdm3a	11102.1	32476.6	33949.9	3113.54	6970.49	6064.62	2.92527	3.05797	1.54857	1.61257	2.23877	1.94782	1.1627	0.961861
	0.976879	0.660045	1.09954	0.415554					1442	Arhgef1	6425.04	7099.16	10282.9			1.10492	1.60044			0.143943	0.678468									Tnpo2	18261.5	35942.4	28855.7	4543.62	9736.35	6060.33	1.9682	1.58013	0.976879	0.660045	2.14286	1.33381	1.09954	0.415554
	0.380257	0.840226	0.838212	0.913855					1443	Arhgef10	7588.94	4346.25	10751.1			0.572708	1.41668			-0.804127	0.502511									Dscr3	18725.4	24372.5	33524.6	3216.61	5750.76	6060.33	1.30157	1.79033	0.380257	0.840226	1.78783	1.88407	0.838212	0.913855
	0.918255	1.14905	0.199441	0.290249					1444	Arhgef11	15057.6	24956.6	29650.3			1.6574	1.96912			0.728925	0.977552									Mtcp1	19850.6	37514.3	44022.3	4955.9	5690.63	6060.33	1.88983	2.21768	0.918255	1.14905	1.14825	1.22285	0.199441	0.290249
	0.918255	1.14905	0.199441	0.290249					1445	Arhgef12	7039.2	8310.26	8526.12			1.18057	1.21123			0.239482	0.276478									Mtcp1	19850.6	37514.3	44022.3	4955.9	5690.63	6060.33	1.88983	2.21768	0.918255	1.14905	1.14825	1.22285	0.199441	0.290249
	0.621309	0.566901	0.492966	0.631368					1446	Arhgef15	4015.65	6162.91	5820.1			1.53472	1.44935			0.617978	0.53541									Nus1	25786.1	39665.9	38197.9	3912.33	5505.96	6060.33	1.53827	1.48134	0.621309	0.566901	1.40734	1.54903	0.492966	0.631368
	0.776056	1.05738	0.251124	0.459861					1447	Arhgef17	15263.8	21976	32768.7			1.43975	2.14683			0.525819	1.10221									Ero1l	21121.9	36170.1	43957.8	4406.2	5243.97	6060.33	1.71244	2.08115	0.776056	1.05738	1.19013	1.37541	0.251124	0.459861
	1.02332	1.00339	0.753452	0.378172					1448	Arhgef18	15877.9	37265.2	30071.2			2.34698	1.8939			1.23081	0.921361									Gmnn	17239.4	35040.5	34559.8	4659.58	7855.22	6056.03	2.03259	2.0047	1.02332	1.00339	1.68582	1.29969	0.753452	0.378172
	0.719432	0.766218	0.764667	0.534334					1449	Arhgef19	4698.53	16053.6	11129.1			3.41673	2.36863			1.77262	1.24405									Telomerase-vert	23441.1	38596.6	39868.8	4178.59	7099.33	6051.74	1.64653	1.70081	0.719432	0.766218	1.69898	1.44827	0.764667	0.534334
	0.719432	0.766218	0.764667	0.534334					1450	Arhgef2	6910.36	11836.2	8354.31			1.71282	1.20895			0.776376	0.27376									Telomerase-vert	23441.1	38596.6	39868.8	4178.59	7099.33	6051.74	1.64653	1.70081	0.719432	0.766218	1.69898	1.44827	0.764667	0.534334
	0.877988	0.956292	0.260515	0.234218					1451	Arid1a	15281	20004.8	23353.4			1.30913	1.52827			0.388609	0.6119									Adipor1	20580.8	37823.5	39933.2	5144.86	6163.06	6051.74	1.83781	1.94032	0.877988	0.956292	1.19791	1.17627	0.260515	0.234218
	0.943008	0.976785	1.13873	0.279695					1452	Arid1b	10372	21546.6	14788.6			2.07738	1.42583			1.05477	0.511798									Lamp2	20580.8	39567.2	40504.4	4981.67	10969	6047.44	1.92253	1.96807	0.943008	0.976785	2.20187	1.21394	1.13873	0.279695
	0.732198	0.930955	0.551683	0.184646					1453	Arid2	9727.75	15083	14389.2			1.55051	1.47919			0.632747	0.564805									Scd2	17836.4	29629.2	34005.7	5320.93	7799.39	6047.44	1.66117	1.90654	0.732198	0.930955	1.46579	1.13654	0.551683	0.184646
	0.746715	1.14626	0.494226	0.170739					1454	Arid3a	3341.37	6845.77	8706.52			2.04879	2.60567			1.03477	1.38166									Cks1b	17166.4	28804.6	37996	5372.47	7567.47	6047.44	1.67797	2.2134	0.746715	1.14626	1.40856	1.12563	0.494226	0.170739
	0.987879	1.20802	0.634509	0.408395					1455	Arid3b	15929.5	27181.2	27429.6			1.70635	1.72194			0.770912	0.784037									Wdr5	15186.5	30118.8	35083.8	4556.51	7073.57	6047.44	1.98327	2.3102	0.987879	1.20802	1.55241	1.32721	0.634509	0.408395
	0.317193	0.704224	0.019365	-0.00494					1456	Arid4a	17312.4	27816.8	39671.2			1.60676	2.29149			0.684152	1.19629									Atp6v1e1	19279.4	24020.3	31411.3	6068.18	6150.18	6047.44	1.2459	1.62927	0.317193	0.704224	1.01351	0.996582	0.0193648	-0.00493933
	0.658235	0.752307	0.457934	0.51124					1457	Arid4b	15487.1	28482.5	35994.4			1.83911	2.32415			0.879009	1.21671									Crtap	14611	23058.3	24611.9	4243	5828.07	6047.44	1.57815	1.68448	0.658235	0.752307	1.37357	1.42527	0.457934	0.51124
	0.562207	0.914676	0.450338	0.596967					1458	Arid5a	39847.3	52301	51856.9			1.31254	1.30139			0.392356	0.380054									Hspe1	18141.3	26786.1	34199	3998.22	5463.01	6047.44	1.47653	1.88515	0.562207	0.914676	1.36636	1.51253	0.450338	0.596967
	0.835347	1.17856	0.399382	0.934083					1459	Arih1	25652.9	30647	39061.2			1.19468	1.52268			0.256625	0.606614									Pif1	10195.9	18192.4	23078.5	3165.08	4174.56	6047.44	1.78429	2.26351	0.835347	1.17856	1.31894	1.91068	0.399382	0.934083
	0.655998	0.553086	1.34943	0.268758					1460	Arih2	17419.8	32618.3	36531.3			1.87249	2.09712			0.904957	1.06841									Gm13150	18059.7	28456.8	26497.6	5016.02	12781.4	6043.15	1.57571	1.46722	0.655998	0.553086	2.54811	1.20477	1.34943	0.268758
	0.984932	0.950454	0.562349	0.184786					1461	Arl1	11875.2	22259.5	24096.5			1.87446	2.02915			0.906473	1.02088									Ncapg	18643.8	36900.2	36028.8	5316.64	7850.93	6043.15	1.97922	1.93248	0.984932	0.950454	1.47667	1.13665	0.562349	0.184786
	1.02796	1.29623	0.995083	0.964728					1462	Arl10	10999	22087.7	16012.8			2.00815	1.45584			1.00587	0.54185									Srr	18957.3	38656.7	46556.5	3096.36	6171.65	6043.15	2.03914	2.45586	1.02796	1.29623	1.9932	1.95169	0.995083	0.964728
	0.648458	0.773833	0.715244	0.864257					1463	Arl13b	8941.8	18948.3	19784			2.11907	2.21253			1.08343	1.1457									Iqcc	15263.8	23925.8	26098.1	3319.68	5450.12	6043.15	1.56749	1.70981	0.648458	0.773833	1.64176	1.8204	0.715244	0.864257
	0.100411	0.522849	-0.15017	0.120961					1464	Arl15	14911.6	28568.4	30140			1.91585	2.02124			0.937986	1.01524									Arrdc3	23587.1	25287.2	33889.7	5557.13	5007.76	6043.15	1.07208	1.43679	0.100411	0.522849	0.901141	1.08746	-0.150175	0.120961
	0.812462	0.847596	0.801702	0.202525					1465	Arl16	13533	37278.1	39654			2.75461	2.93018			1.46185	1.55099									Naa50	23539.9	41340.9	42360	5247.93	9147.96	6038.85	1.75621	1.7995	0.812462	0.847596	1.74316	1.15071	0.801702	0.202525
	0.916434	1.1702	1.06408	0.727936					1466	Arl2	12120	25098.3	19513.4			2.07082	1.61002			1.0502	0.687082									Rabgef1	17063.3	32206	38399.8	3646.06	7623.3	6038.85	1.88744	2.25043	0.916434	1.1702	2.09083	1.65627	1.06408	0.727936
	0.477232	0.826797	0.248926	0.260338					1467	Arl2bp	28702.2	47838.8	38644.6			1.66673	1.3464			0.737017	0.429104									Rqcd1	17733.3	24686	31454.3	5041.79	5991.27	6038.85	1.39207	1.77374	0.477232	0.826797	1.18832	1.19776	0.248926	0.260338
	1.00605	1.1082	0.444909	0.570334					1468	Arl3	8224.57	14387.3	12301.7			1.7493	1.49572			0.806782	0.580842									1700029F09Rik	19300.9	38764.1	41608.3	4066.93	5536.02	6038.85	2.00841	2.15577	1.00605	1.1082	1.36123	1.48487	0.444909	0.570334
	0.78314	0.863771	0.243336	0.57797					1469	Arl4a	8649.76	15521.1	18779			1.79439	2.17104			0.843497	1.11838									Opn3	24068.1	41418.2	43798.9	4045.46	4788.72	6038.85	1.72087	1.81979	0.78314	0.863771	1.18373	1.49275	0.243336	0.57797
	0.437509	0.706331	-0.30813	0.102203					1470	Arl4c	14353.3	27456.1	39701.2			1.91288	2.76601			0.935746	1.4678									Atic	15092	20438.5	24624.8	5625.85	4543.92	6038.85	1.35426	1.63165	0.437509	0.706331	0.807686	1.07341	-0.308134	0.102203
	0.442522	0.468286	0.586219	0.766531					1471	Arl4d	21207.8	40709.6	44490.5			1.91956	2.09784			0.940773	1.0689									Yars2	20851.3	28336.5	28847.1	3547.29	5325.57	6034.56	1.35898	1.38346	0.442522	0.468286	1.50131	1.70117	0.586219	0.766531
	0.758193	1.13584	0.409167	0.628392					1472	Arl5a	17621.6	28611.4	31248.1			1.62365	1.77328			0.699242	0.826423									Tiam1	11802.1	19961.8	25934.9	3903.74	5183.85	6034.56	1.69137	2.19747	0.758193	1.13584	1.32792	1.54584	0.409167	0.628392
	0.625086	1.14192	0.128421	0.445304					1473	Arl5b	7623.3	9998.08	15617.6			1.31152	2.04867			0.391235	1.03469									Pim2	17802	27456.1	39284.6	4431.96	4844.56	6034.56	1.5423	2.20675	0.625086	1.14192	1.0931	1.3616	0.128421	0.445304
	0.859073	0.742492	0.775222	0.048234					1474	Arl5c	6669.85	7086.27	18525.5			1.06243	2.7775			0.0873721	1.47379									Ciapin1	29934.9	54298	50082.9	5831.98	9981.16	6030.26	1.81387	1.67306	0.859073	0.742492	1.71145	1.034	0.775222	0.0482344
	0.80732	1.00327	1.09449	0.868662					1475	Arl6	8267.52	15319.2	21768.5			1.85294	2.63301			0.889817	1.39671									Zswim3	18880	33039.2	37845.7	3302.5	7052.09	6030.26	1.74996	2.00454	0.80732	1.00327	2.13538	1.82597	1.09449	0.868662
	0.91437	0.814695	0.087001	-0.12382					1476	Arl6ip1	33860.3	50986.8	54339.5			1.5058	1.60481			0.590528	0.682407									Rpl34	17819.2	33584.6	31342.6	6570.65	6979.08	6030.26	1.88475	1.75893	0.91437	0.814695	1.06216	0.917757	0.0870008	-0.123816
	0.946055	1.15097	0.14561	0.61945					1477	Arl6ip4	8838.73	18402.8	24045			2.08207	2.72041			1.05802	1.44382									Zscan29	13056.2	25154.1	28993.1	3925.21	4342.06	6030.26	1.9266	2.22063	0.946055	1.15097	1.1062	1.53629	0.14561	0.61945
	0.823831	1.05387	0.259261	-0.31391					1478	Arl6ip5	4380.71	10410.4	7611.23			2.37641	1.73744			1.24879	0.796965									Lpcat3	21001.6	37175	43601.3	7485.38	8958.99	6021.67	1.7701	2.07609	0.823831	1.05387	1.19687	0.804457	0.259261	-0.313912
	0.991499	1.13676	1.17521	0.751272					1479	Arl6ip6	11578.8	25630.8	24375.7			2.2136	2.1052			1.14639	1.07395									Ndufa11	15049	29921.2	33090.8	3577.35	8078.55	6021.67	1.98825	2.19887	0.991499	1.13676	2.25825	1.68328	1.17521	0.751272
	0.671956	0.907536	0.455114	0.857256					1480	Arl8a	8168.74	12102.5	18632.9			1.48156	2.281			0.567118	1.18967									Ergic1	14297.4	22779.1	26819.7	3323.97	4556.8	6021.67	1.59323	1.87584	0.671956	0.907536	1.37089	1.81159	0.455114	0.857256
	0.502923	0.866077	0.047987	0.241745					1481	Arl8b	11454.3	24990.9	31677.7			2.1818	2.76558			1.12552	1.46758									6030443J06Rik	13550.1	19201.7	24697.8	5089.03	5261.15	6017.38	1.41708	1.8227	0.502923	0.866077	1.03382	1.18242	0.0479875	0.241745
	1.09528	1.08809	0.484796	0.714323					1482	Armc1	16947.3	33558.9	33095.1			1.98018	1.95282			0.985635	0.965559									Rabepk	16161.4	34529.5	34357.9	3667.54	5132.31	6017.38	2.13654	2.12593	1.09528	1.08809	1.39939	1.64071	0.484796	0.714323
	0.909906	0.905374	0.892467	0.358627					1483	Armc10	14585.2	26872	30638.2			1.84242	2.10064			0.8816	1.07083									Hnrnph3	24484.7	46004.9	45860.7	4689.64	8705.6	6013.08	1.87892	1.87303	0.909906	0.905374	1.85635	1.28221	0.892467	0.358627
	0.267541	0.584821	0.625986	0.332443					1484	Armc2	3715.01	6549.43	6009.09			1.76296	1.61752			0.818003	0.69378									Strn3	20885.7	25141.2	31325.5	4775.53	7369.91	6013.08	1.20375	1.49985	0.267541	0.584821	1.54327	1.25914	0.625986	0.332443
	0.786694	0.97297	1.05218	0.904489					1485	Armc5	4552.5	8851.4	6739.29			1.94429	1.48035			0.959247	0.565938									Ube2n	14954.5	25798.3	29353.9	3212.32	6661.26	6013.08	1.72512	1.96288	0.786694	0.97297	2.07366	1.87188	1.05218	0.904489
	1.13412	1.12014	0.091339	0.210594					1486	Armc6	17656	27520.5	27086			1.55871	1.5341			0.64035	0.617391									Lin7c	11613.2	25489.1	25243.3	5196.39	5536.02	6013.08	2.19484	2.17368	1.13412	1.12014	1.06536	1.15716	0.0913394	0.210594
	0.937286	0.935941	1.0242	0.604864					1487	Armc7	5553.2	13416.7	17249.8			2.41602	3.10629			1.27264	1.63519									Snapc1	16870	32304.8	32274.7	3950.98	8035.61	6008.79	1.91492	1.91314	0.937286	0.935941	2.03383	1.52084	1.0242	0.604864
	1.0204	1.0493	0.233169	0.430765					1488	Armc8	10702.7	24875	27339.4			2.32418	2.55445			1.21672	1.35301									Tmem50a	13696.2	27782.5	28344.5	4457.73	5239.68	6008.79	2.02849	2.06952	1.0204	1.0493	1.17541	1.34795	0.233169	0.430765
	0.512983	0.680801	0.173612	0.448948					1489	Armc9	8314.76	17745.7	14161.5			2.13425	1.70318			1.09373	0.76823									Pom121	19541.4	27885.5	31325.5	4401.9	4964.81	6008.79	1.427	1.60303	0.512983	0.680801	1.12788	1.36504	0.173612	0.448948
	1.11718	1.30657	-0.69542	0.304664					1490	Armcx1	5849.54	11389.6	13457.1			1.94709	2.30054			0.961318	1.20197									Exosc4	10681.2	23170	26420.2	4861.42	3002.08	6004.49	2.16923	2.47353	1.11718	1.30657	0.617532	1.23513	-0.695415	0.304664
	0.94909	0.878932	0.171875	0.558026					1491	Armcx4	6824.46	10071.1	13942.5			1.47573	2.04301			0.561433	1.0307									Nomo1	19584.3	37810.6	36015.9	4075.52	4591.16	6000.2	1.93065	1.83901	0.94909	0.878932	1.12652	1.47225	0.171875	0.558026
	0.728911	0.852647	0.856269	0.377136					1492	Armcx5	6764.33	9852.06	10914.3			1.45647	1.61351			0.542478	0.690201									Zfp868	23243.5	38523.6	41973.4	4616.63	8357.72	5995.9	1.65739	1.80581	0.728911	0.852647	1.81035	1.29876	0.856269	0.377136
	1.19663	1.24298	0.605676	0.241464					1493	Arnt	13949.6	28319.3	30990.4			2.03012	2.22161			1.02157	1.1516									Psmd3	14924.5	34207.4	35324.3	5071.85	7717.79	5995.9	2.29203	2.36687	1.19663	1.24298	1.52169	1.18219	0.605676	0.241464
	0.529391	0.781208	1.0551	0.695714					1494	Arnt2	4960.51	4943.21	10025.2			0.996512	2.021			-0.00504026	1.01507									Fam116a	29342.2	42350.1	50426.5	3701.89	7692.02	5995.9	1.44332	1.71857	0.529391	0.781208	2.07786	1.61969	1.0551	0.695714
	0.737194	0.95286	0.282089	0.434632					1495	Arntl	6077.16	15160.3	17726.6			2.49464	2.91692			1.31883	1.54445									Pafah1b2	18776.9	31299.8	36346.6	4436.26	5394.29	5995.9	1.66693	1.93571	0.737194	0.95286	1.21595	1.35157	0.282089	0.434632
	0.412993	0.552722	1.18691	0.207821					1496	Arntl2	14129.9	21714	25471			1.53674	1.80263			0.619873	0.8501									Rpl35a	21598.6	28757.4	31682	5187.8	11810.8	5991.61	1.33145	1.46685	0.412993	0.552722	2.27664	1.15494	1.18691	0.207821
	0.79271	0.87695	-0.03263	0.109718					1497	Arpc1a	6575.36	17221.8	17984.3			2.61914	2.73511			1.38909	1.4516									Cep192	18390.4	31858.2	33773.8	5552.84	5428.65	5991.61	1.73233	1.83649	0.79271	0.87695	0.977635	1.07902	-0.0326324	0.109718
	1.07541	1.27332	0.803697	0.576368					1498	Arpc1b	17810.6	31664.9	44726.7			1.77787	2.51124			0.830148	1.3284									Stau1	14679.7	30934.8	35483.3	4015.39	7009.14	5987.31	2.10732	2.41717	1.07541	1.27332	1.74557	1.49109	0.803697	0.576368
	0.442424	0.595329	0.622544	0.407642					1499	Arpc2	17007.5	26464	35174			1.55602	2.06815			0.637863	1.04834									Topbp1	21766.1	29577.7	32884.6	4513.56	6949.02	5987.31	1.35889	1.51082	0.442424	0.595329	1.53959	1.32652	0.622544	0.407642
	0.496952	0.866844	0.389019	0.644289					1500	Arpc3	7185.22	15362.2	15497.4			2.13803	2.15684			1.09628	1.10892									Aldh2	18149.9	25613.7	33099.4	3830.73	5016.35	5987.31	1.41123	1.82367	0.496952	0.866844	1.3095	1.56297	0.389019	0.644289
	0.732687	1.14332	0.431937	0.859191					1501	Arpc4	12717	29371.5	33739.4			2.30964	2.6531			1.20767	1.40768									Ercc6	16672.5	27705.2	36827.7	3298.21	4449.43	5983.02	1.66173	2.20889	0.732687	1.14332	1.34904	1.81402	0.431937	0.859191
	0.447424	1.08787	0.43684	-0.05972					1502	Arpc5	14838.6	31407.2	32304.8			2.11659	2.17708			1.08174	1.12239									Xrn2	19936.5	27185.5	42377.2	6231.38	8435.02	5978.72	1.3636	2.12561	0.447424	1.08787	1.35364	0.959454	0.43684	-0.0597151
	1.05573	1.1071	0.370992	0.507954					1503	Arpc5l	19996.7	37175	40839.5			1.85906	2.04232			0.894574	1.03021									Ubc	8009.83	16650.6	17254.1	4204.35	5437.24	5978.72	2.07877	2.15412	1.05573	1.1071	1.29324	1.42203	0.370992	0.507954
	1.49204	1.36138	1.60543	0.984702					1504	Arpp19	13812.1	29191.1	33692.1			2.11344	2.43932			1.0796	1.28648									Ptplad1	15865	44626.3	40762.2	3019.06	9186.62	5974.43	2.81287	2.56931	1.49204	1.36138	3.04287	1.9789	1.60543	0.984702
	0.60134	0.569813	0.557957	-0.06075					1505	Arrb2	13679	28499.7	37188.5			2.08347	2.71866			1.05899	1.4429									Gtpbp6	22522	34168.7	33430.1	6231.38	9173.73	5974.43	1.51713	1.48433	0.60134	0.569813	1.47218	0.958765	0.557957	-0.0607506
	1.18011	1.15347	0.933136	0.657449					1506	Arrdc1	13846.5	31145.2	33559			2.24932	2.42365			1.16949	1.27718									5730590G19Rik	12755.6	28903.4	28374.6	3787.78	7232.47	5974.43	2.26594	2.22448	1.18011	1.15347	1.90942	1.57729	0.933136	0.657449
	0.460337	0.620391	0.067676	-0.14944					1507	Arrdc2	36548.9	58343.6	57548.1			1.59632	1.57455			0.674748	0.654942									Spg11	37133	51089.9	57084.2	6626.47	6944.72	5974.43	1.37586	1.53729	0.460337	0.620391	1.04803	0.901601	0.067676	-0.149439
	0.775101	1.08776	0.33619	0.194154					1508	Arrdc3	23587.1	25287.2	33889.7			1.07208	1.43679			0.100411	0.522849									Slc35e2	15057.6	25768.3	32004.1	5222.16	6592.55	5974.43	1.71131	2.12544	0.775101	1.08776	1.26242	1.14405	0.33619	0.194154
	1.35085	1.59569	0.570475	0.636339					1509	Arrdc4	13524.4	27739.5	44554.9			2.05108	3.29442			1.03638	1.72002									Paf1	12072.7	30793.1	36488.4	3843.61	5707.81	5974.43	2.55063	3.02238	1.35085	1.59569	1.48501	1.55438	0.570475	0.636339
	1.39131	1.44921	0.256161	0.685524					1510	Arsg	16818.5	25557.8	34297.8			1.51963	2.03929			0.603717	1.02807									Gpr137	9427.12	24728.9	25741.6	3714.78	4436.55	5974.43	2.62317	2.73059	1.39131	1.44921	1.1943	1.60829	0.256161	0.685524
	0.683619	0.810761	0.275619	0.297661					1511	Arsk	5892.49	14279.9	19487.7			2.42341	3.3072			1.27704	1.72561									Glmn	22848.4	36698.3	40079.2	4857.12	5879.61	5970.13	1.60616	1.75414	0.683619	0.810761	1.21051	1.22915	0.275619	0.297661
	0.868279	1.28604	0.171791	0.358894					1512	Art5	6536.71	6699.75	9496.86			1.02494	1.45285			0.0355426	0.538886									Sec63	16049.7	29298.5	39138.6	4655.28	5243.97	5970.13	1.82548	2.43858	0.868279	1.28604	1.12646	1.28244	0.171791	0.358894
	0.086755	0.968209	0.457695	0.692852					1513	Arv1	14361.9	23135.6	25677.2			1.61091	1.78787			0.687872	0.838243									Fzd7	23827.6	25304.4	46616.6	3693.3	5072.18	5970.13	1.06198	1.95641	0.0867545	0.968209	1.37335	1.61648	0.457695	0.692852
	0.870322	1.15576	1.45882	0.89311					1514	Arvcf	14860.1	28138.9	34993.6			1.8936	2.35488			0.921128	1.23565									Ncapd2	15366.9	28091.7	34237.6	3212.32	8830.15	5965.84	1.82807	2.22802	0.870322	1.15576	2.74884	1.85717	1.45882	0.89311
	0.498506	0.781665	0.521178	0.192079					1515	Arxes1	9422.82	12781.1	19693.8			1.35639	2.09002			0.439777	1.06351									Kcnk5	27748.8	39202.1	47703.3	5222.16	7494.46	5965.84	1.41275	1.71911	0.498506	0.781665	1.43513	1.14241	0.521178	0.192079
	0.895335	1.20988	0.212861	0.491641					1516	Arxes2	8469.37	13811.8	18937.9			1.63079	2.23604			0.705574	1.16095									Atp6v0b	13752	25579.3	31810.8	4243	4917.57	5965.84	1.86004	2.31318	0.895335	1.20988	1.15898	1.40604	0.212861	0.491641
	0.721122	0.759689	-0.41979	-0.00086					1517	As3mt	5149.48	9744.7	9200.48			1.89237	1.78668			0.920191	0.837282									Fubp1	19232.2	31703.5	32562.5	5969.41	4462.32	5965.84	1.64846	1.69313	0.721122	0.759689	0.747531	0.999402	-0.419794	-0.000863061
	0.97732	1.19302	0.440915	-0.13563					1518	Asah1	25730.2	48912.4	42707.9			1.90097	1.65983			0.926737	0.73104									2610507B11Rik	20958.7	41263.6	47918.1	6549.17	8890.27	5961.54	1.9688	2.28631	0.97732	1.19302	1.35747	0.910274	0.440915	-0.135627
	0.563124	0.519949	0.516505	0.444613					1519	Asap1	9800.77	11720.3	13951.1			1.19585	1.42347			0.258038	0.509408									Gm17452	3435.85	5076.35	4926.68	4380.43	6266.14	5961.54	1.47747	1.4339	0.563124	0.519949	1.43049	1.36095	0.516505	0.444613
	1.63006	1.73048	0.566469	0.981586					1520	Asap2	23716	31759.4	38120.6			1.33916	1.60738			0.421324	0.684711									Smyd4	11127.9	34443.6	36926.5	3019.06	4470.91	5961.54	3.09526	3.31838	1.63006	1.73048	1.48089	1.97463	0.566469	0.981586
	0.575148	0.80659	1.04485	0.721964					1521	Asap3	8735.65	17273.3	27859.2			1.97734	3.18913			0.983558	1.67316									Ipo7	12502.2	18626.2	21867.2	3611.71	7451.51	5957.25	1.48983	1.74907	0.575148	0.80659	2.06315	1.64943	1.04485	0.721964
	0.912852	0.962641	0.724332	0.643512					1522	Asb1	4101.55	10878.5	10218.5			2.65229	2.49137			1.40724	1.31694									Avpi1	16565.1	31188.2	32283.3	3813.55	6300.5	5957.25	1.88276	1.94887	0.912852	0.962641	1.65214	1.56213	0.724332	0.643512
	0.922164	0.963638	0.793085	0.478332					1523	Asb13	7777.91	17234.7	10519.1			2.21585	1.35244			1.14786	0.435561									Tmem87b	17956.6	34027	35019.4	4273.07	7404.27	5952.95	1.89496	1.95022	0.922164	0.963638	1.73278	1.39313	0.793085	0.478332
	0.739404	1.15844	0.702636	0.545103					1524	Asb3	9719.16	16826.7	22670.5			1.73129	2.33255			0.791846	1.22191									Rnaset2b	17518.5	29247	39104.2	4079.81	6639.79	5952.95	1.66949	2.23216	0.739404	1.15844	1.62748	1.45912	0.702636	0.545103
	0.522715	0.688875	0.64209	0.620462					1525	Asb7	7472.98	16165.3	15664.9			2.16317	2.0962			1.11314	1.06778									Zfp280b	21233.6	30505.3	34229.1	3869.38	6038.51	5948.66	1.43666	1.61203	0.522715	0.688875	1.56059	1.53737	0.64209	0.620462
	0.818133	0.876419	0.756718	0.737142					1526	Ascc1	21001.6	46679.2	44073.8			2.22265	2.09859			1.15228	1.06942									Ubl3	14108.5	24875	25900.5	3568.76	6029.93	5948.66	1.76312	1.83581	0.818133	0.876419	1.68964	1.66687	0.756718	0.737142
	1.29476	1.86456	0.730808	0.904464					1527	Ascc2	11261	20228.1	25711.5			1.7963	2.28324			0.845024	1.19108									Vps25	8989.05	22053.3	32734.3	3177.96	5274.04	5948.66	2.45335	3.64158	1.29476	1.86456	1.65957	1.87185	0.730808	0.904464
	0.766645	0.472261	0.557641	-0.29756					1528	Ascc3	14044	26386.7	32931.9			1.87885	2.3449			0.909853	1.22953									Gpt2	27035.9	45996.3	37506.3	7300.72	10745.6	5940.07	1.70131	1.38728	0.766645	0.472261	1.47186	0.813628	0.557641	-0.297559
	0.904957	1.06841	0.866151	0.634481					1529	Ascl2	4402.18	4221.7	5742.78			0.959002	1.30453			-0.0603941	0.383531									Arih2	17419.8	32618.3	36531.3	3826.43	6974.79	5940.07	1.87249	2.09712	0.904957	1.06841	1.82279	1.55238	0.866151	0.634481
	0.657873	0.612736	0.687307	0.463656					1530	Ascl4	8675.53	13562.7	12847.2			1.56333	1.48085			0.64462	0.566427									Slc38a2	25257.8	39850.6	38623.1	4307.42	6936.13	5940.07	1.57775	1.52916	0.657873	0.612736	1.61027	1.37903	0.687307	0.463656
	0.435917	-0.526212	-0.16927	-0.21639					1531	Asf1a	13116.4	22152.1	16695.7			1.68889	1.27289			0.756077	0.348113									Gm15951	9117.89	12334.4	6331.24	6901.32	6137.3	5940.07	1.35277	0.694376	0.435917	-0.526212	0.889294	0.860715	-0.169268	-0.216392
	0.74388	1.04818	0.245995	0.505983					1532	Asf1b	14834.3	23870	24405.8			1.60911	1.64523			0.686263	0.718286									Ppcs	17256.6	28899.1	35685.2	4182.88	4960.52	5940.07	1.67467	2.06792	0.74388	1.04818	1.18591	1.42009	0.245995	0.505983
	-0.25015	0.353792	-0.22053	0.538944					1533	Ash2l	14804.2	27636.5	18512.6			1.86679	1.2505			0.900563	0.322501									Dusp4	22341.6	18785.1	28550.7	4088.4	3508.87	5940.07	0.84081	1.27792	-0.250148	0.353792	0.85825	1.45291	-0.22053	0.538944
	0.886248	0.919511	0.498999	0.315074					1534	Asna1	18888.6	27039.5	20789.1			1.43153	1.10062			0.517553	0.138315									1110049F12Rik	27254.9	50376.9	51551.9	4771.23	6742.86	5935.77	1.84836	1.89147	0.886248	0.919511	1.41323	1.24408	0.498999	0.315074
	0.765268	0.969642	0.384009	0.905239					1535	Asns	17857.8	36303.2	34095.9			2.0329	1.9093			1.02354	0.933041									Ddt	14160	24067.5	27730.3	3169.37	4135.91	5935.77	1.69969	1.95835	0.765268	0.969642	1.30496	1.87285	0.384009	0.905239
	0.553625	1.13464	0.090755	0.704795					1536	Asnsd1	10732.7	25386	29328.1			2.36529	2.73259			1.24202	1.45027									Camk2g	15341.1	22517.2	33683.6	3641.77	3878.22	5935.77	1.46777	2.19564	0.553625	1.13464	1.06493	1.62991	0.0907548	0.704795
	0.698536	0.778185	-0.15126	0.475615					1537	Aspg	4513.85	3530.25	12890.1			0.782093	2.85568			-0.354588	1.51384									Pou5f1	17106.2	27761	29336.7	4268.77	3843.86	5935.77	1.62286	1.71497	0.698536	0.778185	0.900461	1.39051	-0.151265	0.475615
	0.748725	1.03188	0.870593	0.576806					1538	Asph	16178.6	34903.1	36960.8			2.15737	2.28456			1.10927	1.19191									Bub3	13812.1	23208.6	28241.4	3976.74	7271.13	5931.48	1.68031	2.04469	0.748725	1.03188	1.82841	1.49154	0.870593	0.576806
	0.883905	0.975485	0.635119	0.424646					1539	Aspm	9414.23	14451.7	20883.6			1.53509	2.2183			0.618324	1.14946									Pole	20391.8	37630.2	40096.4	4419.08	6863.12	5931.48	1.84536	1.9663	0.883905	0.975485	1.55307	1.34224	0.635119	0.424646
	0.685023	0.735784	1.10079	0.470625					1540	Aspscr1	17385.4	34757.1	46608			1.99921	2.68087			0.99943	1.4227									Sertad1	28753.8	46228.3	47883.7	4277.36	9173.73	5927.18	1.60773	1.6653	0.685023	0.735784	2.14472	1.38571	1.10079	0.470625
	0.972295	1.00791	-0.11266	0.507298					1541	Asrgl1	14812.8	27026.6	28993.1			1.82454	1.9573			0.867535	0.968865									Pebp1	15147.8	29719.4	30462.1	4170	3856.75	5927.18	1.96196	2.01099	0.972295	1.00791	0.92488	1.42139	-0.112662	0.507298
	-0.27849	-0.240567	-0.25843	-0.4728					1542	Ass1	21349.5	28323.6	28361.7			1.32666	1.32845			0.407802	0.409741									Speer4c	5896.78	4861.61	4991.11	8219.75	6871.71	5922.88	0.824452	0.846413	-0.278493	-0.240567	0.836	0.720567	-0.258425	-0.472796
	1.27213	1.35299	0.514665	0.838769					1543	Aste1	9233.85	22203.7	20926.6			2.40459	2.26629			1.26579	1.18033									Atf7	12059.8	29126.7	30805.7	3306.8	4724.3	5914.29	2.41518	2.55441	1.27213	1.35299	1.42866	1.78852	0.514665	0.838769
	1.27213	1.35299	0.514665	0.838769					1544	Asxl1	13460	22998.2	30324.7			1.70864	2.25295			0.772846	1.17182									Atf7	12059.8	29126.7	30805.7	3306.8	4724.3	5914.29	2.41518	2.55441	1.27213	1.35299	1.42866	1.78852	0.514665	0.838769
	1.02137	1.04287	0.169457	0.680971					1545	Asxl2	22238.5	37316.7	38747.7			1.67802	1.74237			0.74676	0.801047									Gm15287	13648.9	27705.2	28121.2	3689.01	4148.79	5914.29	2.02984	2.06032	1.02137	1.04287	1.12464	1.60322	0.169457	0.680971
	0.772134	1.00648	0.875578	0.41242					1546	Atad1	16865.7	28740.2	36608.6			1.70406	2.17059			0.768974	1.11809									Nup98	17595.8	30050.1	35350.1	4440.55	8147.27	5910	1.70779	2.009	0.772134	1.00648	1.83474	1.33092	0.875578	0.41242
	0.947796	0.848704	0.99757	0.681607					1547	Atad2	23995.1	41259.3	43292.1			1.71949	1.8042			0.781977	0.851362									Tfam	19953.7	38489.2	35934.3	3684.71	7357.02	5910	1.92892	1.80088	0.947796	0.848704	1.99663	1.60393	0.99757	0.681607
	0.924136	1.06892	1.1117	0.883406					1548	Atad2b	11664.7	20739.2	23018.4			1.77794	1.97333			0.830205	0.980635									Cox18	18033.9	34220.2	37832.8	3203.73	6923.25	5910	1.89755	2.09787	0.924136	1.06892	2.161	1.84472	1.1117	0.883406
	1.00043	1.03546	0.958653	0.926592					1549	Atad3a	20383.2	32128.7	35852.7			1.57624	1.75893			0.656484	0.814701									Ptcd1	13176.5	26360.9	27008.7	3109.25	6042.81	5910	2.0006	2.04976	1.00044	1.03546	1.94349	1.90078	0.958653	0.926592
	0.994098	1.18194	0.692353	0.932585					1550	Atad5	10423.5	23526.4	33262.6			2.25705	3.19112			1.17444	1.67406									Smc5	17462.7	34782.8	39619.6	3096.36	5003.46	5910	1.99183	2.26881	0.994098	1.18194	1.61592	1.90869	0.692353	0.932585
	0.711633	1.22165	0.391101	0.80622					1551	Atat1	13906.6	23745.5	30054			1.70749	2.16113			0.77188	1.11179									4930412M03Rik	15813.5	25897.1	36879.2	3379.8	4432.25	5910	1.63766	2.33213	0.711633	1.22165	1.31139	1.74862	0.391101	0.80622
	1.22287	1.26991	1.00785	0.568963					1552	Ate1	13666.1	27679.4	25677.2			2.02541	1.87889			1.01821	0.909884									Hint1	17389.7	40589.3	41934.8	3981.04	8005.54	5905.7	2.3341	2.41147	1.22287	1.26991	2.01092	1.48346	1.00785	0.568963
	0.604047	0.405607	0.068284	0.249216					1553	Atf1	15087.7	23560.8	23533.8			1.56159	1.5598			0.643016	0.641365									Gtf2ird2	14915.9	22671.8	19758.3	4968.78	5209.61	5905.7	1.51997	1.32465	0.604047	0.405607	1.04847	1.18856	0.0682837	0.249216
	0.711748	0.763175	0.454195	0.714584					1554	Atf2	23037.4	31179.6	37313.1			1.35343	1.61967			0.436625	0.695704									Rpusd2	14941.7	24471.3	25359.3	3598.82	4930.45	5905.7	1.63779	1.69722	0.711748	0.763175	1.37002	1.64101	0.454195	0.714584
	1.03841	1.17683	0.896458	0.216106					1555	Atf3	8413.54	29101	23387.8			3.45882	2.77978			1.79028	1.47497									Srd5a3	20752.5	42625	46917.3	5080.44	9457.19	5901.41	2.05396	2.2608	1.03841	1.17683	1.86149	1.16159	0.896458	0.216106
	0.870046	1.20856	0.864906	0.178924					1556	Atf4	20078.3	27662.2	30818.6			1.37772	1.53492			0.462283	0.618167									Slc25a36	18253	33361.3	42183.9	5209.28	9487.25	5897.11	1.82772	2.31107	0.870046	1.20856	1.82122	1.13204	0.864906	0.178924
	0.806064	1.29386	0.785993	0.229762					1557	Atf5	21568.6	34830.1	34568.4			1.61486	1.60272			0.691405	0.680523									Lrrc59	15521.5	27138.3	38056.1	5028.91	8671.24	5897.11	1.74844	2.45184	0.806064	1.29386	1.72428	1.17264	0.785993	0.229762
	0.801179	1.55882	1.13486	0.931435					1558	Atf6	9667.63	14808.2	19792.6			1.53173	2.04731			0.615158	1.03373									Mrpl38	11411.3	19884.5	33619.1	3092.07	6790.11	5897.11	1.74252	2.94612	0.801179	1.55882	2.19598	1.90717	1.13486	0.931435
	0.61202	0.726951	0.2087	0.038505					1559	Atf6b	12081.3	28053	25264.8			2.32202	2.09123			1.21538	1.06435									Sdccag3	29226.2	44669.3	48373.4	5741.8	6635.49	5897.11	1.5284	1.65514	0.61202	0.726951	1.15565	1.02705	0.2087	0.038505
	0.816272	1.24121	0.501733	0.477844					1560	Atf7	12059.8	29126.7	30805.7			2.41518	2.55441			1.27213	1.35299									Cdkn2aipnl	16165.7	28465.3	38215.1	4234.42	5995.57	5897.11	1.76085	2.36396	0.816272	1.24121	1.41591	1.39266	0.501733	0.477844
	1.15488	1.21959	-0.08154	0.747333					1561	Atf7ip2	10865.9	22165	26604.9			2.03987	2.44848			1.02848	1.29189									Kctd13	11385.5	25351.7	26514.7	3512.93	3319.89	5897.11	2.22665	2.32881	1.15488	1.21959	0.945049	1.67869	-0.0815394	0.747333
	1.15853	1.4083	0.944827	0.881143					1562	Atg10	9414.23	20760.6	23546.7			2.20524	2.50118			1.14094	1.32261									Pygb	13752	30698.6	36501.3	3199.43	6158.77	5892.82	2.2323	2.65425	1.15853	1.4083	1.92496	1.84183	0.944827	0.881143
	0.975496	1.4824	0.272042	0.425059					1563	Atg12	9117.89	18578.9	20355.3			2.03763	2.23246			1.02689	1.15863									Nln	13790.6	27116.8	38532.9	4389.02	5299.81	5892.82	1.96632	2.79413	0.975496	1.4824	1.20752	1.34263	0.272042	0.425059
	0.810102	0.967531	1.57519	0.722482					1564	Atg13	5003.46	9306.64	9252.02			1.86004	1.84912			0.895334	0.886842									Plekhj1	22569.2	39571.5	44134	3568.76	10634	5888.52	1.75334	1.95549	0.810102	0.967531	2.97974	1.65002	1.57519	0.722482
	0.650422	0.881112	1.10638	0.734686					1565	Atg14	8147.26	20588.8	20209.3			2.52709	2.4805			1.33748	1.31063									Tab1	19142	30045.8	35255.6	3538.7	7619.01	5888.52	1.56963	1.84179	0.650422	0.881112	2.15305	1.66403	1.10638	0.734686
	0.857064	1.33853	0.693497	0.683092					1566	Atg16l1	14482.1	24372.5	24719.3			1.68294	1.70689			0.750981	0.771367									2410003L11Rik	12364.8	22396.9	31269.6	3667.54	5931.14	5888.52	1.81135	2.52893	0.857064	1.33853	1.6172	1.60558	0.693497	0.683092
	0.782722	1.04903	0.636585	0.832469					1567	Atg16l2	8920.33	21812.8	18040.2			2.44529	2.02236			1.29001	1.01604									Cenpv	16513.6	28409.5	34168.9	3306.8	5140.9	5888.52	1.72037	2.06914	0.782722	1.04903	1.55464	1.78073	0.636585	0.832469
	1.48605	1.86354	-0.01512	0.261316					1568	Atg2a	8301.88	17153.1	20870.8			2.06617	2.51398			1.04696	1.32997									Usp22	11325.4	31725	41213.2	4912.95	4861.73	5888.52	2.80122	3.63899	1.48606	1.86354	0.989574	1.19857	-0.0151198	0.261316
	0.539517	0.907524	0.249811	0.625145					1569	Atg2b	10148.6	14859.7	20913.7			1.4642	2.06074			0.550117	1.04316									1110065P20Rik	16401.9	23839.9	30767.1	3817.85	4539.62	5888.52	1.45349	1.87582	0.539517	0.907524	1.18905	1.54237	0.249811	0.625145
	0.794963	0.89273	0.27303	0.179344					1570	Atg3	11909.5	21623.9	23993.4			1.81568	2.01464			0.860509	1.01052									Dhx15	14963.1	25961.5	27781.8	5196.39	6279.02	5884.23	1.73503	1.85669	0.794963	0.89273	1.20834	1.13237	0.27303	0.179344
	1.50213	1.32033	0.660243	0.758355					1571	Atg4c	7455.8	16281.2	15493.1			2.1837	2.07799			1.12678	1.05519									Chmp3	12012.6	34027	29998.2	3478.58	5497.37	5884.23	2.83261	2.49723	1.50213	1.32033	1.58035	1.69156	0.660243	0.758355
	0.931239	1.56586	0.191838	0.772676					1572	Atg4d	21508.4	34469.3	37579.4			1.6026	1.74719			0.680411	0.805039									Ublcp1	12094.2	23062.6	35805.4	3444.22	3934.05	5884.23	1.90691	2.96054	0.931239	1.56586	1.14222	1.70844	0.191838	0.772676
	0.872941	0.925349	1.05382	0.509186					1573	Atg5	20696.7	31398.6	34920.6			1.51708	1.68725			0.6013	0.754676									Sumo1	22268.6	40782.6	42291.3	4131.35	8576.75	5879.93	1.83139	1.89914	0.872941	0.925349	2.07602	1.42325	1.05382	0.509186
	0.798079	0.726939	0.648598	0.311862					1574	Atg7	11149.3	22525.8	23374.9			2.02037	2.09653			1.01462	1.068									Alg1	20275.8	35255.3	33559	4736.88	7425.74	5879.93	1.73878	1.65512	0.798079	0.726939	1.56764	1.24131	0.648598	0.311862
	0.523154	0.756955	0.620935	0.444664					1575	Atg9a	7430.03	11995.1	11902.2			1.61441	1.60191			0.691008	0.67979									Kpna4	26743.8	38433.4	45194.9	4320.31	6644.08	5879.93	1.43709	1.68992	0.523154	0.756955	1.53787	1.361	0.620935	0.444664
	0.617984	0.897862	1.0046	0.775974					1576	Atg9b	3998.47	6223.03	6112.18			1.55635	1.52863			0.638169	0.612239									Pgam1	19764.7	30333.5	36827.7	3431.34	6884.59	5875.64	1.53473	1.8633	0.617984	0.897862	2.00639	1.71235	1.0046	0.775974
	0.797035	0.973546	0.672753	0.499165					1577	Athl1	6296.2	10663.8	14324.8			1.69368	2.27514			0.760163	1.18596									Nsun4	20211.4	35117.8	39688.3	4157.11	6626.9	5875.64	1.73753	1.96366	0.797035	0.973546	1.59411	1.4134	0.672753	0.499165
	0.797035	0.973546	0.672753	0.499165					1578	Atic	15092	20438.5	24624.8			1.35426	1.63165			0.437509	0.706331									Nsun4	20211.4	35117.8	39688.3	4157.11	6626.9	5875.64	1.73753	1.96366	0.797035	0.973546	1.59411	1.4134	0.672753	0.499165
	0.76809	0.884352	0.143327	0.203709					1579	Atl1	8331.94	15010	15845.3			1.8015	1.90175			0.849201	0.927328									Gm12694	17428.4	29680.7	32171.6	5101.91	5634.8	5875.64	1.70301	1.84594	0.76809	0.884352	1.10445	1.15165	0.143327	0.203709
	0.671236	0.774624	0.737964	0.099559					1580	Atl2	14924.5	26541.3	27528.4			1.77837	1.84451			0.830559	0.883241									Atp5c1	23058.9	36719.8	39447.8	5479.83	9139.37	5871.34	1.59244	1.71074	0.671236	0.774624	1.66782	1.07145	0.737964	0.0995587
	1.23445	0.874711	1.06491	0.58092					1581	Atl3	16079.8	25222.8	29487.1			1.5686	1.8338			0.649482	0.874834									Mdm4	12970.3	30518.2	23782.9	3925.21	8211.69	5871.34	2.35292	1.83364	1.23445	0.874711	2.09204	1.4958	1.06491	0.58092
	0.797598	1.0602	0.130868	-0.22974					1582	Atm	12077	23878.6	24783.7			1.97719	2.05214			0.983453	1.03713									Csnk2a1	20920	36363.3	43622.8	6879.85	7533.11	5867.05	1.7382	2.08522	0.797598	1.0602	1.09495	0.852787	0.130868	-0.229742
	1.0226	1.12844	0.556283	0.694817					1583	Atmin	22534.9	35835.1	35564.9			1.5902	1.57821			0.669211	0.658293									Als2	18197.1	36968.9	39782.8	3624.59	5329.87	5867.05	2.03158	2.18622	1.0226	1.12844	1.47048	1.61868	0.556283	0.694817
	0.574333	1.03525	0.09398	0.234948					1584	Atn1	8288.99	16362.8	14711.3			1.97405	1.7748			0.981155	0.827658									Trim59	16045.4	23891.5	32884.6	4981.67	5316.99	5862.75	1.48899	2.04947	0.574333	1.03525	1.06731	1.17686	0.0939803	0.234948
	0.786797	0.447274	0.265738	-0.28056					1585	Atoh7	5600.44	7648.88	8019.28			1.36576	1.4319			0.449708	0.517933									Glg1	25498.3	43990.7	34766	7116.05	8555.28	5858.46	1.72524	1.36346	0.786797	0.447274	1.20225	0.823274	0.265738	-0.280555
	0.847158	1.3439	0.910729	0.523537					1586	Atox1	15431.3	32416.5	45525.6			2.1007	2.95022			1.07087	1.56082									1200014J11Rik	17136.3	30827.4	43498.3	4075.52	7661.96	5858.46	1.79895	2.53837	0.847158	1.3439	1.88	1.43748	0.910729	0.523537
	0.855291	0.909982	0.171781	0.90601					1587	Atp10a	10964.7	11952.2	24165.2			1.09006	2.20392			0.124413	1.14007									Gpr89	12085.6	21864.4	22709.1	3126.42	3521.75	5858.46	1.80912	1.87902	0.855291	0.909982	1.12645	1.87386	0.171781	0.90601
	1.14926	1.00608	0.921601	0.60378					1588	Atp10d	14958.8	30032.9	33344.2			2.0077	2.22907			1.00555	1.15644									Nfatc2ip	16170	35865.1	32476.6	3852.2	7296.9	5854.16	2.21801	2.00845	1.14926	1.00608	1.89422	1.51969	0.921601	0.60378
	0.574171	0.873696	0.677097	0.689934					1589	Atp11a	7623.3	13451	10686.6			1.76446	1.40184			0.819229	0.487322									Cnnm3	24282.9	36152.9	44494.8	3628.89	5802.3	5854.16	1.48882	1.83235	0.574171	0.873696	1.59892	1.61321	0.677097	0.689934
	0.573562	0.821243	0.105954	0.33994					1590	Atp11b	12845.8	32781.5	33060.7			2.55193	2.57366			1.35159	1.36382									Ndufab1	14048.3	20906.7	24822.4	4625.22	4977.69	5854.16	1.48819	1.76693	0.573562	0.821243	1.07621	1.2657	0.105954	0.33994
	0.733147	0.91254	0.07779	0.455642					1591	Atp13a1	32924.1	50389.8	48098.5			1.53049	1.46089			0.613991	0.54685									Hinfp	20336	33803.7	38279.5	4268.77	4505.26	5854.16	1.66226	1.88236	0.733147	0.91254	1.0554	1.37139	0.0777899	0.455642
	0.559998	0.695286	0.497326	0.006543					1592	Atp13a2	10406.3	22517.2	22481.5			2.16379	2.16036			1.11356	1.11127									Fam108a	25906.3	38192.8	41947.7	5823.4	8220.28	5849.87	1.47427	1.61921	0.559998	0.695286	1.41159	1.00455	0.497326	0.00654285
	0.654121	0.894291	0.488933	0.104485					1593	Atp13a3	17342.5	26180.5	31329.7			1.50962	1.80653			0.594187	0.853224									Nars	16784.1	26412.5	31196.6	5441.18	7636.19	5849.87	1.57366	1.8587	0.654121	0.894291	1.40341	1.07511	0.488933	0.104485
	0.494517	0.380021	0.3358	0.053034					1594	Atp1a1	28285.7	40769.7	45744.7			1.44136	1.61724			0.527426	0.693534									Mbtps1	29200.4	41139	38000.3	5638.73	7116.51	5849.87	1.40885	1.30136	0.494517	0.380021	1.26208	1.03744	0.3358	0.0530343
	1.00348	0.995743	0.877167	0.952252					1595	Atp1b1	28178.3	47929	56040.5			1.70092	1.98878			0.766314	0.991886									Caml	14065.5	28199.1	28048.2	3023.36	5553.2	5849.87	2.00484	1.99411	1.00348	0.995743	1.83676	1.93489	0.877167	0.952252
	0.555727	0.845003	-0.00447	0.519903					1596	Atp1b2	20275.8	29178.3	45353.8			1.43907	2.23684			0.525134	1.16146									Fam203a	17290.9	25416.1	31059.1	4079.81	4067.19	5849.87	1.46991	1.79627	0.555727	0.845003	0.996907	1.43386	-0.00446958	0.519903
	0.786607	0.898187	1.33074	0.722376					1597	Atp1b3	19601.5	27202.7	31660.5			1.38778	1.6152			0.472783	0.691717									Hdgfrp2	23758.9	40984.4	44280	3542.99	8911.75	5845.57	1.72501	1.86372	0.786607	0.898187	2.51532	1.6499	1.33074	0.722376
	1.0548	1.09038	0.793051	0.278769					1598	Atp2a2	20172.7	29813.9	37291.6			1.47793	1.84861			0.563577	0.886443									Arf3	21061.8	43754.5	44847	4818.47	8349.13	5845.57	2.07744	2.12931	1.0548	1.09038	1.73273	1.21316	0.793051	0.278769
	0.755201	1.02913	0.784151	0.639134					1599	Atp2a3	3160.98	8482.05	9131.76			2.68336	2.8889			1.42404	1.53052									Tdp1	21701.7	36629.6	44288.6	3753.43	6463.7	5845.57	1.68787	2.04079	0.755201	1.02913	1.72208	1.55739	0.784151	0.639134
	1.13316	1.11159	0.473961	0.547986					1600	Atp2b1	6699.91	10569.3	14092.8			1.57753	2.10343			0.657663	1.07274									Cdk19	14520.8	31849.6	31377	3998.22	5553.2	5845.57	2.19338	2.16084	1.13316	1.11159	1.38892	1.46204	0.473961	0.547986
	0.878082	1.46316	0.849345	0.828364					1601	Atp5a1	12734.1	20739.2	24611.9			1.62863	1.93275			0.703658	0.950659									A130049A11Rik	16036.8	29474.6	44215.6	3289.62	5926.85	5841.28	1.83793	2.75712	0.878082	1.46316	1.80168	1.77567	0.849345	0.828364
	1.02191	1.39394	0.68308	0.754929					1602	Atp5b	23595.7	41091.8	46612.3			1.74149	1.97546			0.800325	0.982187									Ogdhl	10646.8	21619.6	27979.4	3461.4	5557.5	5841.28	2.03061	2.62796	1.02191	1.39394	1.60556	1.68755	0.68308	0.754929
	1.45378	1.42128	0.842169	0.646952					1603	Atp5c1	23058.9	36719.8	39447.8			1.59244	1.71074			0.671236	0.774624									C2cd4b	10148.6	27799.7	27180.5	3727.66	6682.74	5836.98	2.73925	2.67824	1.45378	1.42128	1.79274	1.56586	0.842169	0.646952
	0.868356	1.23338	0.849196	0.640915					1604	Atp5d	5677.74	4518.03	9466.79			0.795744	1.66735			-0.329623	0.737559									Stat2	15787.7	28821.8	37119.8	3740.54	6738.57	5832.69	1.82558	2.35118	0.868356	1.23338	1.8015	1.55932	0.849196	0.640915
	0.848766	0.905327	0.752839	0.637606					1605	Atp5e	12351.9	17578.2	20355.3			1.42312	1.64795			0.50906	0.720673									Spcs2	13704.8	24681.7	25668.6	3749.13	6317.68	5832.69	1.80096	1.87297	0.848766	0.905327	1.68511	1.55574	0.752839	0.637606
	0.950105	0.728366	0.4828	0.576133					1606	Atp5f1	3014.96	5986.83	6172.31			1.98571	2.04723			0.989653	1.03367									Gm14325	9229.56	17831.6	15291.2	3912.33	5467.3	5832.69	1.93201	1.65676	0.950105	0.728366	1.39745	1.49085	0.4828	0.576133
	0.859184	0.877525	0.147045	0.076583					1607	Atp5g1	18927.2	36397.7	41251.8			1.92303	2.17949			0.943381	1.12399									Rbx1	15521.5	28156.1	28516.3	5527.07	6120.12	5828.39	1.81401	1.83722	0.859184	0.877525	1.1073	1.05452	0.147045	0.0765825
	0.810715	0.889379	0.746988	0.742821					1608	Atp5g2	25176.2	36243.1	37880			1.43958	1.5046			0.525644	0.589377									Hscb	14585.2	25583.6	27017.3	3482.87	5845.25	5828.39	1.75408	1.85238	0.810715	0.889379	1.67829	1.67344	0.746988	0.742821
	1.073	1.07859	1.02997	0.578768					1609	Atp5g3	20477.7	36067	38438.4			1.76128	1.87709			0.816626	0.908497									Srp9	19064.7	40108.3	40263.9	3899.44	7962.59	5824.1	2.1038	2.11196	1.073	1.07859	2.04198	1.49357	1.02997	0.578768
	0.699242	0.826423	0.374113	0.160951					1610	Atp5h	12025.5	21344.7	29448.4			1.77496	2.44883			0.827784	1.2921									Arl5a	17621.6	28611.4	31248.1	5209.28	6751.45	5824.1	1.62365	1.77328	0.699242	0.826423	1.29604	1.11802	0.374113	0.160951
	0.820854	0.997479	0.311761	0.229143					1611	Atp5j	8619.69	11591.4	16154.5			1.34476	1.87414			0.427349	0.906231									2700050L05Rik	17381.1	30702.9	34701.5	4968.78	6167.36	5824.1	1.76645	1.99651	0.820854	0.997479	1.24122	1.17214	0.311761	0.229143
	0.61316	0.81667	0.380102	-0.05416					1612	Atp5j2	4045.72	4243.17	4918.09			1.0488	1.21563			0.068746	0.281702									Hat1	17531.4	26816.2	30878.7	6042.42	7863.81	5819.8	1.52961	1.76134	0.61316	0.81667	1.30143	0.963157	0.380102	-0.0541569
	0.330435	0.987679	0.097266	0.411311					1613	Atp5k	12124.3	22444.2	23087.1			1.85118	1.90421			0.888443	0.929191									Tmem220	14464.9	18188.1	28683.8	4376.14	4681.35	5819.8	1.25739	1.98299	0.330435	0.987679	1.06974	1.32989	0.0972657	0.411311
	1.16054	1.66054	0.141547	0.766563					1614	Atp5l	11462.9	17668.4	17730.9			1.54136	1.54681			0.624208	0.629299									Skil	7095.03	15860.4	22429.9	3418.45	3770.85	5815.51	2.23542	3.16136	1.16054	1.66054	1.10309	1.70121	0.141547	0.766563
[truncated: 11,079 more rows]

## Sheet: Fig 6B
Fig 6B	Hypergeometric Overlap
		Total population		12072
		Up		10294
		Up		8677
		Overlap		8053
		P = 3.60 x 10(-274)

## Sheet: Fig 6C
Fig 6C	Total Pol II at TSS: drug vs ctrl
	Comparison of fold change in Pol II at TSS
[truncated: 12,695 more rows]

## Sheet: Fig 6D
Fig 6D	Promoter Loading Index
[truncated: 12,078 more rows]

[truncated: 4 more sheets: Fig 6E+6F, Fig 6G, Fig 6H, Fig 6i]
