# Supplementary material for: Global hyperactivation of enhancers stabilizes human and mouse naive pluripotency through inhibition of CDK8/19 Mediator kinases
Source: Springer Nature journal article supplement (doi:10.1038/s41556-020-0573-1), 2020-09-28
Supplement: MOESM14 [file 41556_2020_573_MOESM14_ESM.xlsx]

## Sheet: Fig 7A
Fig 7A	qPCR in short timecourse +/-2i +/-CDK8/19i in plots and heatmap
				Target/Actin
			Expt_DrugAddition			2i										Expt_DrugAddition			CDK8/19i
		Clone	A	B	C	A	B	C	A	B	C	A	B	C		A	B	C	A	B	C	A	B	C	A	B	C
		Timepoint	5h	5h	5h	20h	20h	20h	50h	50h	50h	LT	LT	LT		5h	5h	5h	20h	20h	20h	50h	50h	50h	LT	LT	LT
		Pramel6 5' eRNA	1.14949	1.5885	1.10854	1.5841	4.65356	1.60399	3.71235	7.19336	4.24471	10.7978	9.27491	12.1988		1.18236	1.46646	1.03025	2.11013	4.30695	3.1991	4.52212	4.86239	3.25502	9.35022	12.6348	14.261
		Pramel6 3' eRNA	1.17636	1.26079	1.10854	1.2573	2.38116	1.27309	3.15798	5.70938	3.96046	3.10731	6.11916	7.68476		0.960373	1.19113	1.18372	3.75983	3.04547	2.01531	6.32179	7.37001	6.51004	6.01404	6.39082	8.98385
		Tbx3 5' eRNA	1.20386	1.29026	1.13446	1.22859	1.88993	1.71912	3.71235	7.30896	5.348	7.82993	5.98216	7.17013		1.29684	1.06118	1.13027	3.34963	2.30804	2.21044	6.46956	6.03352	6.0994	7.57721	7.63344	5.65947
		Tbx3 3' eRNA	1.18211	1.17636	0.943002	1.91499	1.50004	2.54618	4.70545	7.83355	6.14324	7.96864	8.07801	8.23632		0.946298	1.19334	1.05458	2.63232	2.90795	2.56626	5.53788	6.31741	7.3956	9.74053	5.92029	5.92713
		GJB3 5' eRNA	1.0999	1.07252	0.879852	0.979873	1.45532	1.60399	1.48212	2.09895	1.935	2.94241	3.20576	4.11816		1.08701	1.01513	0.912987	1.86133	2.30804	1.61664	3.24226	3.38542	3.6978	3.28828	2.96014	4.70437
		GJB3 3' eRNA	1.15485	1.14949	0.943002	0.549935	0.916792	1.42899	0.93368	1.66594	1.53581	3.01119	2.54441	3.26859		1.16503	1.03886	1.15029	1.06118	1.05214	1.57972	2.69509	2.68701	3.07375	2.37951	2.69883	3.73386
		NANOG	1.07751	0.912355	1.03431	1.70724	1.45532	1.56736	2.83759	2.63902	2.43795	3.5398	3.59834	3.66886		1.04732	1.01513	0.978516	1.68724	1.67018	1.54364	2.45717	2.08397	2.43964	3.18582	3.24526	3.25051
		KLF4	1.05924	0.871154	0.943002	1.87254	1.75078	1.80042	2.30484	2.9622	3.07162	3.90232	3.68245	3.93219		1.03888	0.96929	0.934327	1.72668	1.63203	1.65443	2.0425	2.39385	2.61474	3.41448	3.39874	3.25051
		TFCP2L1	1.07651	1.05193	0.734092	1.74715	1.65443	1.70488	2.70945	2.5871	1.92341	4.28017	5.0806	4.38831		0.969312	0.911112	1.14079	1.61105	1.24603	1.57462	2.57338	2.64207	1.85232	3.74509	3.22508	3.43585
		REX1/ZFP42	0.854429	1.26549	0.441566	1.38671	1.40737	1.81043	2.15049	1.81378	1.73869	2.69634	3.40896	2.94445		0.92554	1.04659	0.926609	1.46883	1.17609	1.24315	1.73748	1.86822	1.93992	2.05385	3.20502	3.04196
		Tbx3	0.981482	1.28076	0.709398	1.78798	2.33972	2.0181	2.97179	2.9465	3.09799	4.28017	4.90754	4.75793		1.13921	1.13498	1.18127	2.02979	1.97794	1.93858	3.31804	2.40883	2.74347	3.92221	5.23915	4.43008
				For Heatmaps, with 3 replicates
							Expt_DrugAddition													Expt_Drug Withdrawal
				Clone/Timpoint	5h	5h	5h	20h	20h	20h	50h	50h	50h	LT	LT	LT		5h	5h	5h	20h	20h	20h	50h	50h	50h	LT	LT	LT
		2i eRNAs		Pramel6 5' eRNA	1.14949	1.5885	1.10854	1.5841	4.65356	1.60399	3.71235	7.19336	4.24471	10.7978	9.27491	12.1988		11.4663	9.43703	13.0412	4.53677	4.48052	6.73495	2.38226	2.62503	4.03714	1.33515	0.747943	1.22688
				Pramel6 3' eRNA	1.17636	1.26079	1.10854	1.2573	2.38116	1.27309	3.15798	5.70938	3.96046	3.10731	6.11916	7.68476		7.22334	11.8899	6.52058	4.97605	7.11238	5.34553	2.4312	2.81344	2.37293	1.21728	0.820362	1.11858
				Tbx3 5' eRNA	1.20386	1.29026	1.13446	1.22859	1.88993	1.71912	3.71235	7.30896	5.348	7.82993	5.98216	7.17013		7.74179	8.80506	9.22149	4.22807	5.91208	4.98756	3.0504	2.73019	2.31873	1.39829	0.783316	1.09303
				Tbx3 3' eRNA	1.18211	1.17636	0.943002	1.91499	1.50004	2.54618	4.70545	7.83355	6.14324	7.96864	8.07801	8.23632		9.53126	8.78474	9.88335	6.71165	5.51617	5.7292	2.79917	3.46375	2.60268	0.880869	0.899794	0.867539
				GJB3 5' eRNA	1.0999	1.07252	0.879852	0.979873	1.45532	1.60399	1.48212	2.09895	1.935	2.94241	3.20576	4.11816		3.78248	3.48623	2.97248	2.66352	2.65246	1.13682	1.39959	2.00973	1.03288	0.803108	0.841479	1.09303
				GJB3 3' eRNA	1.15485	1.14949	0.943002	0.549935	0.916792	1.42899	0.93368	1.66594	1.53581	3.01119	2.54441	3.26859		3.21763	4.19402	3.74509	2.85469	3.04688	2.07292	1.64528	2.20432	1.10701	0.766841	0.942349	1.06807
		CDK8/19i eRNAs		Pramel6 5' eRNA	1.18236	1.46646	1.03025	2.11013	4.30695	3.1991	4.52212	4.86239	3.25502	9.35022	12.6348	14.261		12.978	8.75233	10.3651	4.494	5.9285	7.27863	1.15856	2.32947	2.08204	1.73909	0.452503	0.916157
				Pramel6 3' eRNA	0.960373	1.19113	1.18372	3.75983	3.04547	2.01531	6.32179	7.37001	6.51004	6.01404	6.39082	8.98385		8.17565	11.0272	8.22681	3.56689	5.04318	5.77705	1.45969	2.19314	1.65252	1.4456	0.806269	0.937571
				Tbx3 5' eRNA	1.29684	1.06118	1.13027	3.34963	2.30804	2.21044	6.46956	6.03352	6.0994	7.57721	7.63344	5.65947		8.03148	7.44532	10.3651	4.19305	5.28169	5.51617	2.06432	2.02792	1.40574	1.36131	0.905006	0.835281
				Tbx3 3' eRNA	0.946298	1.19334	1.05458	2.63232	2.90795	2.56626	5.53788	6.31741	7.3956	9.74053	5.92029	5.92713		10.119	6.17455	11.1091	5.25856	4.00277	6.33641	2.55148	2.12383	2.62321	1.6529	0.817902	0.744151
				GJB3 5' eRNA	1.08701	1.01513	0.912987	1.86133	2.30804	1.61664	3.24226	3.38542	3.6978	3.28828	2.96014	4.70437		5.05952	3.08727	1.74957	3.31268	2.52159	1.2573	1.27574	1.33793	1.31161	1.22575	0.961483	0.895232
				GJB3 3' eRNA	1.16503	1.03886	1.15029	1.06118	1.05214	1.57972	2.69509	2.68701	3.07375	2.37951	2.69883	3.73386		4.01574	3.08727	2.65185	3.46935	3.22061	1.83995	1.20692	1.68568	1.22377	1.1704	0.76313	1.12792
		2i genes		NANOG	1.07751	0.912355	1.03431	1.70724	1.45532	1.56736	2.83759	2.63902	2.43795	3.5398	3.59834	3.66886		3.44857	4.00462	4.10771	3.27918	3.1181	3.14196	1.5351	1.59512	1.75727	0.96616	0.73086	0.847724
				KLF4	1.05924	0.871154	0.943002	1.87254	1.75078	1.80042	2.30484	2.9622	3.07162	3.90232	3.68245	3.93219		4.34493	3.7218	4.08216	4.1315	3.09227	3.68926	1.93411	2.08252	2.01764	1.30465	0.879243	0.908568
				TFCP2L1	1.07651	1.05193	0.734092	1.74715	1.65443	1.70488	2.70945	2.5871	1.92341	4.28017	5.0806	4.38831		5.47427	4.50544	7.84442	5.20537	4.37313	5.33936	2.55207	2.23199	2.42727	1.13577	0.920826	0.951538
				REX1/ZFP42	0.854429	1.26549	0.441566	1.38671	1.40737	1.81043	2.15049	1.81378	1.73869	2.69634	3.40896	2.94445		4.34493	3.92221	3.92221	2.60268	3.02164	2.76383	1.6077	1.77154	1.79751	0.901459	0.801625	1.28491
				Tbx3	0.981482	1.28076	0.709398	1.78798	2.33972	2.0181	2.97179	2.9465	3.09799	4.28017	4.90754	4.75793		5.34924	4.40253	4.82881	4.03714	3.84593	4.69568	2.07292	2.87787	1.84335	1.08448	0.765425	1.06807
		CDK8/19i genes		NANOG	1.04732	1.01513	0.978516	1.68724	1.67018	1.54364	2.45717	2.08397	2.43964	3.18582	3.24526	3.25051		3.04336	3.3862	2.84218	2.51054	3.07517	2.60208	1.70685	1.43396	1.54185	0.950659	1.02978	1.07699
				KLF4	1.03888	0.96929	0.934327	1.72668	1.63203	1.65443	2.0425	2.39385	2.61474	3.41448	3.39874	3.25051		4.10961	3.57349	4.23198	3.39011	3.31192	3.22731	2.15049	2.37128	1.21728	0.99562	0.944747	1.20497
				TFCP2L1	0.969312	0.911112	1.14079	1.61105	1.24603	1.57462	2.57338	2.64207	1.85232	3.74509	3.22508	3.43585		4.61288	3.91949	5.84823	4.27127	4.47225	6.3072	2.20076	2.42671	2.49147	1.04271	0.699631	1.12428
				REX1/ZFP42	0.92554	1.04659	0.926609	1.46883	1.17609	1.24315	1.73748	1.86822	1.93992	2.05385	3.20502	3.04196		3.33804	2.25116	3.35893	2.69073	2.81734	2.37786	1.10038	1.52873	0.988742	1.14367	0.749846	0.913198
				Tbx3	1.13921	1.13498	1.18127	2.02979	1.97794	1.93858	3.31804	2.40883	2.74347	3.92221	5.23915	4.43008		4.20566	4.60755	4.3309	4.01018	4.50023	3.90683	1.74674	2.85271	1.50073	0.984184	0.891722	0.9675

## Sheet: Fig 7B+C
Fig 7B and 7C	GSEA analysis of SE-target genes versus Negative Control genesets
	Regarding the relative sensitivity of SE-target genes to CDK8/19i, we have addressed this by the same method previously used to address the selective downregulation of SE-target genes by the BRD4-inhibitor JQ1 (that is, the reverse effect of CDK8/19i; Finley et al 2018; Ref: 28). This involves comparing the geneset of SE-target genes vs the transcriptome RNA-seq by GSEA. Then comparing this to co…
	Negative Control genesets for Figure 7B and 7C.
	Negative controls A:3 genesets with a similar number of random genes
	Negative controls B:3 published housekeeper genesets
	Negative controls C: A 464 gene set containing the most highly expressed genes that are not regulated by SEs. Importantly, these genes are expression-matched to SE-target genes, which are typically among the highest expressed genes. In particular, we find that from the top 800 highest expressed genes in mouse ES cells, 336 genes (42%) are predicted to be enhancer-driven, while the remaining 464 g…
	Table of GSEA analysis of control genesets to compare versus the significant up-regulation of SE-target genes. Origin and derivation of these genesets are listed here, and GSEA results.
	Title of geneset	Origin and derivation of geneset	Significantly affected by CDK8/19i ?	FDR q-value (<0.25 = significant)	NES
	SE-target genes in Figure 5. N= 408 genes.	GREAT analysis was performed to find the single nearest gene to SEs identified in: 2,3.	Yes.	0.0	+1.75
			Strongly up-regulated.
	Housekeeper genes: 3 random genesets.	EISENBERG_Housekeeper_Random500. From 3,384 housekeeper genes, 3 random sets of n = 500 genes were selected.	Geneset#1: No	1.0	0.56
	N = 500 genes (each).		Geneset#2: No	1.0	-0.54
			Geneset#3: No	1.0	-0.54
	Random genesets. N = 500 genes (each).	3 genesets of ~750 genes were randomly selected from mouse RNAseq in this study. Next, enhancer target-genes were removed to leave n = 500 genes.	Geneset#1: No	0.29	-1.07
			Geneset#2: No	0.50	-0.98
			Geneset#3: No	0.36	-1.04
	Top 800 highest expressed genes in 8i minus enhancer-driven genes, leaving 464 genes.	RNASEQ CDK8/19i HIGHEST_800 GENES MINUS ENHANCER-DRIVEN GENES, leaves n =464. This indicates that 336/800 (42%) of the highest expressed genes are enhancer-target genes.	No	1.0	-0.53
	SE-target genes							HSIAO_HOUSEKEEPING_GENES. Housekeeping genes identified as expressed across 19 normal tissues.		Expression-matched control genesets for comparison vs SE-target genes
	SE-target genes in Figure 7. HNISZ646SESTDGREAT	TE-target genes in Figure 7. HNISZ9981_TE_STDGREAT		HOUSEKEEP_EISENBERG_N500GENES_RANDOM1	HOUSEKEEP_EISENBERG_N500GENES_RANDOM2	HOUSEKEEP_EISENBERG_N500GENES_RANDOM3				RNASEQ4_766RANDOMGENES_SET1_MINUS ENHANCER-TARGETS_N500	RNASEQ4_735RANDOMGENES_SET2_MINUS ENHANCER-TARGETS_N500	RNASEQ4_724RANDOMGENES_SET3_MINUS ENHANCER-TARGETS_N500		RNASEQ4_8I_HIGHEST_N800GENES_MINUS_ENHANCER_N464
	n=408	n=8177genes		n=500	n=500	n=500		n=389genes		n=500	n=500	n=500		n=464genes
	1700012A03RIK	0610007P14RIK		AAAS	C2orf69	PDCD2		AAMP		DEFB35	MAP2K7	ZCCHC11		EEF1A1
	1700026D08RIK	0610010F05RIK		ARMCX3	SMARCA2	MYNN		AARS		IFNA14	PARS2	GM1673		PPIA
	1700106J16RIK	0610012H03RIK		NDUFA10	ASB1	PSMD11		ABLIM1		SLC26A2	2010010A06RIK	VMN1R173		RPL41
	1810013L24RIK	0610040J01RIK		SUPT6H	RPL36AL	DNAJC21		ACTB		KRT76	PACSIN2	ZCCHC17		RPS2
	2310044G17RIK	1110001A16RIK		RBM14-RBM4	HAT1	CHCHD4		ACTG1		SAMD8	ZBTB37	MIR483		GAPDH
	2410131K14RIK	1110002E22RIK		COG3	PSMD7	CSTF1		AES		SMOX	RHOX7	ANO1		RN45S
	2410137M14RIK	1110004E09RIK		ZHX1-C8ORF76	GPR107	NMRK1		AGPAT1		GRK6	MLC1	BC004004		RPS28
	2610034B18RIK	1110004F10RIK		UQCRQ	MNAT1	TRPC4AP		ALDOA		MTFMT	UCN3	TGM6		HSP90AB1
	4921524J17RIK	1110008E08RIK		PBDC1	ATAD3A	TMEM81		ANP32B		OLFR1053	OLFR204	MAPK12		RPS12
	4930444G20RIK	1110032F04RIK		ENOPH1	LRRC24	ASCC1		ANXA11		IPO7	9530003J23RIK	2900053A13RIK		RPS29
	6430531B16RIK	1110034G24RIK		SCFD2	MRPS6	WDR6		ANXA2		TAS2R137	SIGLECE	TCEAL6		RPL23A
	6430573F11RIK	1110037F02RIK		FEN1	AP1G1	MRPL14		AP3S1		EIF2AK2	LOC100861570	GPR143		RPS18
	9630014M24RIK	1110038F14RIK		BLOC1S3	SEC23IP	ELP4		APEX1		ZFP951	6030407O03RIK	PON2		RPS21
	9930013L23RIK	1110058L19RIK		WDR89	CDIPT	SMAD5		APLP2		MIA3	MIR543	ADO		RPS5
	A230072I06RIK	1110059E24RIK		NOL6	EIF4E2	METRN		ARAF		GM5531	4921525O09RIK	MOSPD4		RPL35
	AU018091	1110065P20RIK		MRPL47	UXS1	OCIAD1		ARF1		IL20	KRT73	GM15350		UBA52
	ABHD2	1190002N15RIK		NMT1	SOCS4	MSH6		ARF3		9930111J21RIK1	SETD3	YLPM1		RPLP0
	ADAM26B	1190007I07RIK		SENP6	EDF1	CLPX		ARF4		A230108P19RIK	RNASET2B	1700003P14RIK		RPL32
	ADAMTSL4	1500009L16RIK		TELO2	TMBIM4	MTERFD2		ARHGAP1		SULT2B1	FLAD1	GREB1		RPS27
	ADK	1500011B03RIK		POFUT1	ABCB10	EDC3		ARHGDIB		OLFR1230	TMEM215	STRN4		RPL7A
	AGAP1	1500012F01RIK		MCEE	MALSU1	ZNF41		ARL6IP1		LAMTOR2	MIR301	CYB5RL		RPL4
	AGTRAP	1500015O10RIK		DNAJC11	PGPEP1	BAZ1B		ARPC2		GM8817	A430105I19RIK	GM12633		RPS3A
	AHI1	1500035N22RIK		ZNF142	HPS6	CCM2		ATF4		ROS1	4930521E06RIK	1110059G10RIK		RPL26
	ALDOART2	1600014K23RIK		TFPT	NKAP	ABCF2		ATIC		SLC5A5	GM11128	EAPP		RPS4X
	ALPL	1700001C02RIK		MAPKAPK2	WBP4	PARN		ATOX1		DLG4	TMEM89	LILRB3		RPL9
	AMIGO2	1700001K19RIK		RAB1B	GSTO1	UTP23		ATP5A1		WISP2	RTKN	MED31		GM1821
	ANKRD35	1700001O22RIK		ISY1	YWHAE	RAD17		ATP5B		COL6A5	FBXW11	RXFP1		RPL28
	ANXA6	1700001P01RIK		SCYL2	TMEM60	DERL1		ATP5C1		GMPS	LOC100302567	LEPROTL1		RPL19
	APOL7A	1700003F12RIK		ELAVL1	FOPNL	EIF4A3		ATP5F1		DDX52	QSOX1	COL4A4		TPT1
	ARHGAP21	1700003H04RIK		MAPK1	EDC4	DNAJB12		ATP5G1		DOK7	RBP3	GM7337		RPS16
	ARHGEF19	1700003M02RIK		NBN	RBM15	SIL1		ATP5G2		PRSS28	GM11818	4930487D11RIK		RPS25
	ARNTL	1700007B14RIK		PFDN6	POM121C	ZBTB5		ATP5G3		CTSS	OAS1B	BTLA		RPL7
	ASCC1	1700007G11RIK		RBMXL1	ACTR10	RBM14-RBM4		ATP5O		C030034I22RIK	VMN2R91	P2RX2		RPL39
	ATG5	1700007K13RIK		CLPTM1	PPP2R3C	SUMO3		ATP6V1F		GKN3	MIR3086	FBXL2		RPS11
	ATOH1	1700008A04RIK		NTPCR	ARL8A	PEX6		B2M		KRTAP4-9	MIR1902	MXD3		RPL8
	ATP11B	1700008O03RIK		YPEL2	PHPT1	FIP1L1		BCAP31		GM13363	TEX10	BAIAP3		RPS9
	ATP9A	1700008P02RIK		TCF25	DDX42	EEF2		BCLAF1		APOBEC4	NKPD1	0610007N19RIK		RPS27A
	AYM1	1700009N14RIK		WTAP	ARMC8	HNRNPR		BECN1		CCS	C4B	PTN		RPL13
	BC096441	1700009P17RIK		NRIP1	E4F1	SUPT6H		BRD2		TGM7	ZFP68	H2-DMB2		RPL10
	BCAS2	1700010D01RIK		NSDHL	MRPL16	BBS4		BTG2		CPA2	SLC27A6	ZFP358		RPL13A
	BCAT2	1700010H22RIK		PIN1	ADCK4	PSMA4		BUD31		FBXO45	SMAP1	FADS1		RPS10
	BMP8A	1700010I14RIK		CD81	PSMG4	RDX		C1QBP		A4GNT	OLFR1195	LIPG		RPS17
	BRD1	1700010L04RIK		GPS2	ZNF281	ENTPD4		CALM2		UGT2B1	MRGPRA3	2310034G01RIK		APOE
	BRMS1L	1700011H14RIK		KIAA0195	SRSF4	ZNF579		CANX		GM6194	SNORA65	MIR877		RPS15
	BTBD11	1700011I03RIK		PCBP1	TBK1	C2orf76		CAP1		BEX6	GM13043	LALBA		EIF4A1
	BYSL	1700011L22RIK		NAT10	UBA1	C19orf53		CAPN2		MSH4	PRX	GM14391		RPL35A
	C2CD5	1700012A03RIK		NUDT21	LRRC41	PMPCA		CAPNS1		CX3CL1	RPL23A	HIST1H2BF		RPL3
	CACNA1A	1700012B07RIK		SLC25A32	PARK7	DGCR6L		CAPZA1		NFKBIE	PPCDC	9530059O14RIK		RPLP2
	CAMK2N1	1700015E13RIK		TMEM30A	EMC10	UFL1		CASC3		MCAT	VAV2	2006-09-01		RPL17
	CAPNS1	1700015F17RIK		TOP2B	NOP10	PPARA		CAST		CES2D-PS	CAPN8	OLFR1513		RPL18
	CBFA2T2	1700016C15RIK		TMED1	TNFAIP8L2-SCNM1	C22orf28		CCND2		HPCA	LY6G5C	LIN7C		EEF2
	CCAR1	1700016D06RIK		NMD3	FAM108B1	APH1A		CCNI		HAS2AS	VMN1R57	LRFN3		RPL6
	CCDC115	1700016H13RIK		DCTN5	FNTB	NDUFC2-KCTD14		CCR9		OLFR482	OLFR561	DYNLT1C		GM12191
	CCDC160	1700017N19RIK		CHMP4A	SGMS1	LINS		CCT4		THTPA	TAS2R135	KLRI2		RPL34-PS1
	CCDC60	1700018A14RIK		ARMC7	CNOT7	ZSWIM8		CD151		ACE3	MIR30E	GALP		RPS7
	CCK	1700018B24RIK		ZCCHC10	UQCRC2	IVNS1ABP		CD164		GM4278	GM16833	CCDC125		TUBA1B
	CCND3	1700019A02RIK		GLT8D1	SNX25	NUP62		CD34		SERGEF	TRIM59	SAA4		EEF1G
	CCNE1	1700019D03RIK		TMEM128	ETV6	CC2D1A		CD3E		CRISPLD1	IL11RA2	BMP5		ALDOA
	CCR4	1700019M22RIK		MAN2C1	ARFGAP3	GTF2H1		CD63		GM5662	AKAP14	GDAP2		RPSA
	CD9	1700019O17RIK		TM2D1	TUBGCP2	PPP6R3		CD74		MIR425	LOC100503496	PEO1		RPL36A
	CDC5L	1700020N01RIK		COX7C	CCNY	KLHDC2		CD81		GM428	PROC	NCK2		RPL36
	CDKN1A	1700021A07RIK		PIK3CB	GPANK1	UBE2L3		CES2		FGF8	TAAR8B	RABL2		PKM2
	CENPV	1700021F05RIK		STRIP1	NDUFA2	H2AFY		CETN2		TMEM184A	FOXRED1	1700128A07RIK		RPS6
	CHCHD10	1700021F07RIK		FUBP1	WBP2	ZNF740		CFL1		HOXC11	AA987161	NLRP4C		RPL23
	CHD9	1700024G13RIK		SPG11	DNAJB11	TUBB		CHI3L2		CCDC36	BAZ1B	BBS5		EIF2S2
	CHGA	1700024P04RIK		RRNAD1	HNRNPUL2	TGIF2-C20orf24		CHKB		ENDOD1	ZFP167	CRTC1		RPL24
	CIB1	1700024P16RIK		IWS1	MAPK6	ALS2		CIRBP		OGG1	NUDT10	GM14092		RPL10A
	CLDN4	1700025C18RIK		SMIM11	UBTD1	TSNAX		CLIC1		PTGIR	4832428D23RIK	GAL3ST2		PABPC1
	COBL	1700025G04RIK		LUZP6	POP7	CISD2		CLTA		GM2109	TNFRSF12A	NXPH2		LARS2
	COL18A1	1700030J22RIK		ZBTB18	VTI1A	HIGD2A		CLTC		VAMP1	4933402P03RIK	KLHDC3		EIF5A
	COX4I2	1700034H15RIK		AKAP8	KBTBD4	EIF5A		CLU		VMN1R177	ATP2A3	PPP2CA		RPL29
	CRYAA	1700034J05RIK		DCTN4	SLC20A1	MIDN		COMT		4931409K22RIK	RAPGEF6	AU018829		MT2
	CSF3R	1700036A12RIK		HEXA	CMC2	PDE6D		COPA		CRHBP	H2AFJ	TMPRSS15		RPL27
	CSNK1A1	1700041G16RIK		GPR107	CNST	MAGT1		COPS6		NUP35	MTOR	PCDHB8		FAU
	CSNK2A1	1700060C20RIK		KIAA0391	ITFG3	DROSHA		COX10		PTPRE	EPO	DDX21		PRDX1
	CTBP2	1700061G19RIK		CCDC23	CDC16	KIAA0195		COX4I1		SSH3	GTF2H3	ANKRD11		ACTB
	CTIF	1700061I17RIK		UBP1	AMBRA1	SUCLG2		COX6A1		WFIKKN1	C630043F03RIK	PYY		TMSB10
	CTNNA1	1700063H04RIK		URGCP	HNRNPR	C11orf31		COX6B1		GM1976	HMHA1	7630403G23RIK		RPL37
	CTNNB1	1700064H15RIK		MRPL14	FTO	SMAD4		COX6C		MIR5115	NEK3	ZSCAN18		CFL1
	CXXC4	1700065I17RIK		METTL14	ACTR8	TBCE		COX7A2		FAM40A	4930588N13RIK	CNTNAP1		TUBB5
	CYLD	1700066M21RIK		POLG	HNRNPM	VAPA		COX7C		CAPN9	GM3776	OLFR1372-PS1		RPL5
	D130058E05RIK	1700067P10RIK		CARS	RNF31	CMPK1		COX8A		PRPS1L1	TMEM102	OTUB2		RPS3
	DBX1	1700069B07RIK		XRCC5	IFNGR1	WARS2		CSNK2B		HOXB5	GPRASP1	5430405H02RIK		PGAM1
	DDIT4	1700080O16RIK		CRTC2	USP7	ATXN10		CST3		CBFA2T3	OLFR710	OLFR1028		FTH1
	DENND2A	1700084C01RIK		STOML2	ARIH1	FBXL17		CSTB		CENPP	SNCAIP	POMT2		TRIM28
	DERL3	1700086D15RIK		ARHGAP35	ZNF397	LIPT1		CTDSP2		GM9159	GANC	HMX1		SNRPG
	DIO3	1700086L19RIK		AGPAT1	NPLOC4	ULK1		CTNNB1		S100A1	OSTC	LHFPL5		RPL18A
	DLC1	1700101E01RIK		IMPAD1	ZXDB	C1GALT1		CYB5R3		FATE1	ALDOA	PDXK-PS		HSPB1
	DLGAP1	1700101G07RIK		DNAJB9	GZF1	C8orf82		DARC		SSTY2	PWWP2A	H1FOO		RPL15
	DLGAP3	1700106J16RIK		XPO1	TMCC1	RAD50		DAZAP2		CCDC51	RRP8	RBP7		HSPD1
	DLX2	1700109H08RIK		BAD	CNIH	MFAP3		DCTN2		SAR1B	ZWILCH	HOXA7		NME2
	DMRT1	1700110M21RIK		PRPF4B	C7orf73	MSMP		DDB1		ASB16	PPPDE2	UBL4B		PFN1
	DPPA3	1700112E06RIK		TUSC2	GABPB1	EXOC1		DDT		CLIP2	LOC100041033	4930443O20RIK		COX8A
	DPPA5A	1700113H08RIK		FLOT2	EIF6	FDX1		DDX39B		MEG3	TECPR2	WBP2NL		GM9320
	DST	1700119I11RIK		NOP9	SDAD1	TXNDC17		DDX5		S100A2	GJA4	FAM117B		RPL36AL
	DUSP1	1700123L14RIK		PSMA3	PPIG	TFG		DHPS		EIF3C	GM10147	4930545L23RIK		NACA
	DUSP27	1700128F08RIK		GRHPR	TRIM65	FOXP4		DSTN		RHBDD1	2200002J24RIK	9530026F06RIK		LDHA
	DUSP5	1810011O10RIK		ATP5F1	WDR26	HSPA4		DUSP1		AI450353	TAS2R110	TAP2		ATP5A1
	DYM	1810013L24RIK		SDF4	DPY30	DEDD		DVL3		MED22	2010317E24RIK	1700072B07RIK		H3F3A
	DYNC1H1	1810026J23RIK		WDR13	CLPTM1L	ACOX3		DYNLL1		CNPY2	GM3404	GM6880		FABP3
	E130012A19RIK	1810030O07RIK		GTF2F2	C11orf31	STRIP1		ECHS1		OLFR635	OLFR1349	ASB14		GM12070
	ECE1	1810041L15RIK		ZNF444	METTL13	NFKBIB		EEF1A1		RNF166	ACIN1	VMN1R170		TCEB2
	EGF	1810043H04RIK		SLC15A4	CUTA	YTHDC1		EEF1B2		RHOX2D	GM14325	GM1110		RPL21
	EGLN3	1810046K07RIK		PQLC2	C9orf78	UBL7		EEF1D		PRPF39	IKZF3	SSTY1		HMGN1
	EIF4A2	1810055G02RIK		MPDU1	SNX4	CXorf40B		EEF1G		NECAB3	9530077C05RIK	FAM89B		RPS27L
	ELOVL6	1810062G17RIK		DAD1	PTRH2	ZNF24		EEF2		EAR11	GM7367	RGS6		TUBB4B
	ENAH	2010001E11RIK		SRSF1	HS1BP3	RPL10A		EIF1		CST7	4930542H20RIK	4930552N02RIK		PGK1
	ENC1	2010007H06RIK		GLTPD1	RFXANK	PSMB2		EIF3E		GGCX	THOP1	4921536K21RIK		CTSL
	ENSA	2010107G12RIK		CHMP2B	GBA2	CRBN		EIF3F		H2-Q8	4930448I06RIK	STOML2		HNRNPA2B1
	EPB4.9	2010111I01RIK		CINP	FAM20B	GUK1		EIF4A1		MIR297A-3	OPLAH	RSC1A1		CALR
	EPHA2	2010300C02RIK		AKTIP	LRFN3	PPP1R7		EIF4A2		GM4172	4930481A15RIK	SUPT4H1		CHURC1
	ERCC6L2	2210010C04RIK		ZBTB5	BAG6	AP2M1		EIF4A3		MFAP2	BC024978	CYP2A12		MYL6
	ESRRB	2210404J11RIK		FECH	PPID	DCAF11		EIF4G2		GCN1L1	SMARCB1	VMN2R21		USMG5
	ETL4	2210408I21RIK		CPSF3L	HDAC6	PRRC2B		EIF4H		OBOX6	GM8677	5730469M10RIK		ERH
	ETNK1	2300009A05RIK		RAB9A	COPS8	UBE2J1		ENO1		CENPB	PIN4	ANKRD34B		NDUFA7
	F2R	2310001K24RIK		CWC25	CLOCK	CASP7		ERH		OLFR1022	POU3F4	NKRF		SUMO2
	F2RL1	2310008H04RIK		GHDC	GTF2B	FAM208B		ESD		IFNA4	VMN1R118	CPB2		SNRPD2
	FAM134B	2310009B15RIK		MCPH1	TTC7B	NFATC2IP		EZR		2610037D02RIK	CLTB	KLRA15		TXN1
	FAM160B2	2310016G11RIK		R3HDM2	ZNF408	GOLT1B		FAM193A		MIR450-1	NDUFA2	UNKL		SENP3
	FAM167A	2310044G17RIK		CCDC71	NEIL2	MPHOSPH10		FAS		BROX	OLFR1134	RAG2		EIF1
	FAM49A	2310050C09RIK		DPAGT1	TADA3	LARP1		FBL		SLC25A35	PTH	ELMOD1		ATP5L
	FAM53A	2310061N02RIK		NDST1	BCL2L2-PABPN1	TMEM87A		FCGRT		HMG20B	1700067K01RIK	TCTE2		CCT6A
	FBLIM1	2410066E13RIK		KRR1	PHKB	GGNBP2		FHL1		B430010I23RIK	NUP62-IL4I1	RG9MTD2		GABARAPL2
	FBXO36	2410076I21RIK		DROSHA	PIK3R1	MEF2BNB		FKBP1A		TAX1BP3	GM10096	GATAD2B		SPARC
	FGD2	2410089E03RIK		LIG3	GEMIN8	MTX2		FKBP4		DYRK4	MIR1249	MIR500		SLC25A3
	FGF1	2410131K14RIK		NIP7	AARS2	SUCLA2		FLNA		5430417L22RIK	MST1R	MIR23A		CDK4
	FGF15	2510009E07RIK		NFYB	FLOT1	TEX264		FMOD		GM10494	HMGA2-PS1	GM4846		TUBA1C
	FGF17	2610002M06RIK		EIF5B	C18orf25	CAPZB		FNTA		OLFR99	GM11937	NPM2		HMGA1
	FGF3	2610018G03RIK		FNDC3A	TBRG4	PLOD3		FTH1		VMN2R121	ANGPTL4	PPIL6		CCT4
	FGF4	2610019F03RIK		PSMC2	IFT27	DUSP16		FTL		SULT1E1	ZFP692	PHF15		ATP5J2
	FHAD1	2610021A01RIK		FAM192A	MARCH2	NSUN5		FUCA1		SH3BP5	KLRB1C	2010106E10RIK		PDIA3
	FNBP1	2610034M16RIK		MEF2BNB	TRAF6	ZBTB11		FUS		TULP4	LRIT1	VMN1R34		HSPA5
	FOXJ2	2610301B20RIK		PIAS1	STIM1	CDC40		FYN		E130311K13RIK	CHUK	GM6904		COX6B1
	FRMD8	2610528J11RIK		SHOC2	HYPK	XIAP		GAPDH		GM14440	BET1L	EFNA3		H3F3B
	GABBR1	2700049A03RIK		BRPF3	IPO9	SMARCE1		GDI2		MYST4	GM10391	PGP		LAMP1
	GABPA	2700060E02RIK		YARS2	NELFCD	ALDH3A2		GLUL		OLFR835	OLFR320	LRRC47		SRSF2
	GABRP	2700062C07RIK		TRMT12	SIVA1	TANGO2		GNAS		OLFR1444	GM11567	PPAN		HSP90B1
	GADD45A	2700081O15RIK		EMC2	C14orf142	ASNSD1		GNB1		WASH	SYNB	C430048L16RIK		PLP2
	GATA1	2700089E24RIK		RGP1	CHMP2B	ANKFY1		GNB2L1		OLFR1042	TMEM159	2010305A19RIK		CCT5
	GJD3	2810407C02RIK		DDB1	POLR2G	STK11		GPS1		SNORD35A	VMN1R83	D330012F22RIK		PCNA
	GLI2	2810459M11RIK		ECHDC1	DEXI	TRIM3		GPS2		1700020G17RIK	A630089N07RIK	OLFR1509		GSTP2
	GLOD5	2810474O19RIK		GALNS	RHOT2	ULK3		GPX1		CYP21A1	4930578I06RIK	PUS3		CCT2
	GM10076	2900011O08RIK		DCTN2	FARS2	LSM14A		GPX4		D730045A05RIK	5430401F13RIK	LMAN1L		HNRNPAB
	GM10244	2900026A02RIK		PANK4	YTHDF1	SGTA		GSTO1		GM13629	MIR3068	DNASE1L2		DDX5
	GM10277	2900055J20RIK		LIN7C	HNRPLL	UBE2M		GSTP1		KARS	SERPINI2	VMN2R16		OAZ1
	GM10282	3100002H09RIK		GLRX2	NCKIPSD	SRM		GUSB		LSP1	VMN1R205	C1QL1		HINT1
	GM16253	3110001D03RIK		PPWD1	EMC3	EXOSC7		H2AFZ		1700029H14RIK	KLHL35	SNRPG		ATOX1
	GM1631	3110001I22RIK		PURA	THAP7	ZHX1		H3F3B		E230008N13RIK	TMEM67	1700030F04RIK		CNBP
	GM16519	3110007F17RIK		SRSF10	REEP5	FOPNL		HDAC1		KIS2	BC024659	TRNP1		PCBP1
	GM4204	3110018I06RIK		LSM1	ZNF3	APOA1BP		HINT1		OLFR781	4932438H23RIK	TBX6		HNRNPL
	GM4775	3110043O21RIK		ST7	MPND	RNF6		HLA-A		1600014C23RIK	IRF8	TANC2		EIF3L
	GM5420	3110062M04RIK		ATP5D	OSGEP	THAP5		HLA-DOA		MRPS28	ZAR1	RPS7		DDB1
	GM6658	3110079O15RIK		NOL7	NDUFA12	ENY2		HLA-DPA1		LOC100040786	BEST2	WDYHV1		CCT8
	GM867	3222401L13RIK		MAVS	RBM6	MCFD2		HLA-DQB1		GLYR1	FAM151A	E330009D11		PCBP2
	GNPDA1	3830406C13RIK		DLGAP4	ISY1-RAB43	RNF113A		HLA-DRA		POLM	4933416M06RIK	GM17019		PTGES3
	GPA33	3830408C21RIK		WDR83OS	VMA21	TRAPPC2L		HLA-E		TMEM39B	GM14477	SNORD2		SKP1A
	GPC3	3930402G23RIK		PEX2	SCAF1	PSMC3		HMGB1		VMN1R20	GM17769	MIER3		UQCRQ
	GPR37L1	4632415L05RIK		TMX1	SLC15A4	COX16		HMGN2		4930433I11RIK	SRP19	FEM1C		PSMB4
	GPT2	4632428N05RIK		TBC1D23	UBXN4	OSBPL9		HNRNPA1		4930549C01RIK	RHOX2B	GM19589		COX17
	GPX3	4731417B20RIK		PPP2R2A	ZNF24	STAT3		HNRNPC		AIMP2	NFX1	OLFR473		ALDH2
	GPX4	4732440D04RIK		EIF2AK1	KIAA1715	SYPL1		HNRNPF		PGLYRP3	OLFR689	GM6225		1810022K09RIK
	GRB10	4732465J04RIK		SCAMP3	RFT1	SKIV2L2		HNRNPK		OLFR1090	LOC100039753	4933406G16RIK		CCT7
	GRIK3	4833403I15RIK		POP4	TIMM8B	NIPBL		HNRNPL		TIGD3	GM6567	ABHD8		P4HB
	GRIP2	4921501E09RIK		UCHL3	RNF216	RELA		HSP90AA1		MIR1932	1700025E21RIK	TMEM47		CCT3
	GSTA2	4921513D11RIK		PAIP1	CLINT1	TLK1		HSP90AB1		GM13275	ZNHIT3	MIR3075		ATP5K
	GTF2E2	4921524J17RIK		USP22	SEC62	TMCO3		HSPB1		OLFR703	HN1	GM14378		SNRPD3
	GTF3C6	4921524L21RIK		PPIL4	ZC3H10	BCAP29		HSPD1		NEAT1	KBTBD12	TAF11		MIR692-1
	GTSF1L	4921528I07RIK		MCFD2	PRRC2B	UPRT		HTRA1		HIST1H1T	PTGES2	GM15107		AKR1A1
	H2-M5	4921530L21RIK		ZGPAT	SF1	CNIH4		HYAL2		PAPD4	TRAPPC6B	C030039L03RIK		2001-09-01
	HES1	4922501L14RIK		ABCE1	MRPL22	PPP1R11		IFITM1		CYP2C38	PRMT10	CACNA2D2		RPL22
	HMG20A	4922502B01RIK		ZNF394	LRRC47	EIF2B2		ILK		SLC7A6	GM6498	PRPF40B		YWHAZ
	HS6ST1	4922502B01RIK		TAF13	PPWD1	TVP23B		IQGAP1		AI606473	KLHL20	RTCD1		NHP2L1
	HSD17B14	4930402H24RIK		SETD7	PSMA5	CC2D1B		IRAK1		MIR125A	DNAHC6	CTU1		BSG
	HSD17B3	4930404H24RIK		RAD17	ENDOG	TRAPPC5		ISG20		LYRM2	SNORD55	TTC36		ATP5E
	HSPA9	4930408O17RIK		RABGEF1	PRADC1	RABEP1		ITGB1		F630042J09RIK	MIR5133	CDKN2A		G3BP1
	HSPB8	4930423O20RIK		FTO	UBE2V1	FDPS		ITPK1		MARCH2	MIR504	6330578E17RIK		FBL
	I0C0044D17RIK	4930425F17RIK		SPAG7	ERCC5	C7orf25		JOSD1		CSF2RA	VMN1R160	ANGPTL7		FUS
	ID1	4930426L09RIK		PNN	CLCC1	CBR4		JUNB		SPT1	GM6251	TMEM18		RALY
	IDH2	4930430O22RIK		SMIM8	C11orf73	SPG11		JUND		MIR208A	2410012M07RIK	GM10512		NASP
	IER2	4930444G20RIK		C11orf1	ALG5	TSFM		KARS		LRP12	MMP3	MBD3L2		PTBP1
	IFLTD1	4930447A16RIK		PIGF	COPB2	ZNF326		KAT6A		OLFR887	GM9899	RAB11B		SLC25A39
	IFT52	4930447C04RIK		FAM63A	CLTA	ZNF593		LAMP1		SRF	PPM1K	FAM19A1		GSTP1
	IGFBP2	4930449A18RIK		MRPL42	PSME3	SOD1		LASP1		HIC1	4932443I19RIK	VMN2R28		STIP1
	IL17B	4930449E01RIK		ZNF398	NOL10	IFNAR1		LDHA		ZFP942	WFDC16	DNAJC22		UQCRB
	INHBB	4930449I24RIK		ELP6	MAP2K1	CDK4		LDHB		SLC8A3	2310011J03RIK	CNKSR3		MORF4L2
	IRF2BPL	4930452B06RIK		NONO	SDE2	GTPBP10		LGALS1		SOHLH2	ARHGEF15	MIR1190		ATP5C1
	ITGA6	4930453N24RIK		ZNF622	TUBD1	SUZ12		LGALS3		CYTH1	OLFR1002	RYR1		NOP10
	ITPK1	4930455H04RIK		STAU2	CNNM2	MRPL15		LTA4H		MMP13	ATF2	NUDT19		MCM7
	JAM2	4930468A15RIK		TTC1	SEC13	RAF1		MARCKS		SYNJ2BP	GM5124	PSKH1		ATP5J
	KANK1	4930470P17RIK		PDCD5	RAPGEF1	MAN2C1		MAZ		9130204L05RIK	YOD1	ZFP54		GPI1
	KANSL1	4930474N05RIK		SSBP1	ANKRD17	MRPS34		MDH1		KDELR2	GM14347	4931423N10RIK		UBC
	KAT6B	4930485B16RIK		DSCR3	TAZ	ZFAND3		MGP		POLH	IFNA9	APON		MYL12B
	KAZN	4930505A04RIK		PEX6	HNRNPA2B1	PTRH2		MGST2		UTY	CYP2C66	GM10548		CCDC72
	KCNJ8	4930506M07RIK		MLH1	UBQLN2	TMED2		MLF2		PUS7L	4933424B01RIK	AF251705		PSMA7
	KCTD16	4930511M11RIK		THUMPD3	C21orf59	ZNF574		MLH1		KRTAP16-5	OLFR1359	CYB561		GNG5
	KIF13B	4930512B01RIK		MAN2A2	NKIRAS2	DCAF13		MORF4L2		6430598A04RIK	1110001J03RIK	MUG1		2010107E04RIK
	KLF12	4930518I15RIK		RXRA	C3orf38	ARMCX3		MPRIP		FAM98C	GM19583	AA415398		PRMT1
	KLF13	4930522L14RIK		LSM7	XYLT2	EMC2		MSN		SPINLW1	MRVI1	LOC434960		BAX
	KLF2	4930533K18RIK		JAK1	ATXN7L3B	TRIM26		MT2A		TRIM30E-PS1	AY761184	OLFR1077-PS1		EIF3F
	KLF3	4930533L02RIK		PIK3C3	TRIM41	UHRF1BP1L		MTRNR2L8		PREB	CENPN	D6ERTD474E		DSTN
	KLF4	4930539E08RIK		LINS	RRP8	USP39		MYH9		CALU	OLFR345	CDKL5		DTYMK
	KLF5	4930542C12RIK		PWWP2A	HEXIM1	PIAS1		NACA		GM6260	LZTS2	TCTN2		UBE2C
	KLF9	4930544G11RIK		SSRP1	GPX4	ZNF830		NAP1L1		ZMAT3	LRG1	SURF2		ATP5F1
	KNG1	4930546C10RIK		KDM2A	DENND4A	JMJD6		NCL		PCNA	HAPLN4	LGALS4		COX7A2
	KRAS	4930547C10RIK		TMEM50B	DIRC2	ARMCX5		NCOR2		CDH17	MTHFD2L	GBP11		PSMB5
	LACC1	4930548G14RIK		SMAD4	PLBD2	ACOX1		NCSTN		GM10230	OLFR983	FGFR4		U2AF1
	LAMC2	4930548H24RIK		FAM108B1	ZFPL1	KCTD6		NDRG1		C2	MIR299	JSRP1		GPX1
	LAO1	4930550L24RIK		BCAT2	TOMM22	ZCCHC9		NDUFA12		CTLA2A	GUCA1A	MS4A6B		NDUFB4
	LBR	4930555F03RIK		MRPL43	RAB21	SRP68		NDUFA4		4930526I15RIK	OLFR1143	FIBP		HMGB1
	LDHB	4930563I02RIK		NEDD8-MDP1	SF3B1	BZW1		NDUFV2		5430437P03RIK	SELENBP1	ITFG3		UQCRC1
	LEFTY1	4930564D02RIK		BLOC1S2	COG7	ANP32C		NEDD8		TM6SF1	1700066N21RIK	SLC23A3		HMGB2
	LEFTY2	4930566N20RIK		METAP1	DNAJC2	ZNF322		NEFL		CDC42SE1	ENAM	CCL7		PPP1CA
	LINGO1	4930569F06RIK		NKAP	GINM1	CNIH		NFIB		OLFR1449	AKIRIN1	2310057M21RIK		PSMB2
	LOXL1	4930578C19RIK		FICD	NAA20	CASC3		NFKBIA		SNX7	1700073E17RIK	CHMP4B		PHB2
	LRRC2	4930583I09RIK		IPO9	WDR83OS	SGMS1		NONO		OLFR198	GM13483	RFX1		COX5B
	MACF1	4930584F24RIK		CHCHD3	PUM2	KHDRBS1		NPC2		LOC432562	EREG	PHF21B		LAPTM5
	MAEL	4930589L23RIK		NEDD8	EFTUD1	VPS28		NPM1		IFNA6	SPCS3	FBL		PSMA2
	MANBA	4930596D02RIK		MRPL41	CHCHD5	TMEM19		OAZ1		E030002O03RIK	BC024582	GAB3		PSMB1
	MAPT	4930597O21RIK		SNW1	DCTN6	COX20		OS9		HPX	1700054M17RIK	OLFR908		FKBP1A
	MBIP	4931408C20RIK		ELP2	TMED1	NDUFS4		PABPC1		PTHLH	AXL	BC1		EIF3C
	MCL1	4931417E11RIK		EXOC8	TRIM56	TRMT112		PARP1		LOC545261	GM3415	RNF19B		PA2G4
	MCTS2	4931429L15RIK		CENPB	STOM	PEX11A		PAX6		NEIL3	GM10220	CRIM1		PRDX2
	MED13L	4931429P17RIK		TADA1	SCAF8	UQCRHL		PCBP2		MUCL1	1700025K23RIK	HFM1		C1QBP
	MESDC1	4931440F15RIK		ENTPD4	C9orf64	FEN1		PDLIM1		2010016I18RIK	XLR4A	MIR1967		NDUFA3
	MESDC2	4931440L10RIK		UBE2J2	JMJD7	IRF2BPL		PEBP1		OLFR495	GM10375	DDRGK1		CDC42
	MFGE8	4931440P22RIK		PSMA1	MPHOSPH10	ATP6V0D1		PFDN5		6430584L05	MARVELD2	ADH5		VCP
	MGAT5B	4932411E22RIK		FADD	SAP18	DUSP11		PFN1		MPHOSPH10	ZBTB22	GM3219		DPY30
	MIF	4932414N04RIK		RPS27L	NFYC	ATP5H		PGAM1		CDC23	GM10100	NDUFB11		PARK7
	MKRN1	4932418E24RIK		TMEM256	URGCP	OVCA2		PGK1		6820408C15RIK	LHB	OLFR642		TCP1
	MLLT6	4932442E05RIK		RPL7L1	POLR2J	RNF11		PHB2		PRB1	D430020J02RIK	A330040F15RIK		ASNA1
	MOAP1	4933402D24RIK		CRCP	H2AFX	B4GALT3		PI4KA		ZFP108	GM11757	HTATSF1		VDAC2
	MORN1	4933402J07RIK		COA5	EIF3A	PPCS		PIM1		1110018G07RIK	GM8579	KRT5		UBB
	MREG	4933406P04RIK		ANO6	MED10	TLE1		PLP2		WNT5B	STAT6	9330175E14RIK		BEX1
	MSI2	4933408B17RIK		RTCA	HSPBP1	ZFYVE27		POLR2L		NMT2	DDX5	EIF2AK4		BZW1
	MSRA	4933412E24RIK		C12orf29	TEX264	ST7		PPIA		FNDC3C1	KERA	GALNTL4		1810006K21RIK
	MTHFR	4933415A04RIK		TIMMDC1	CST3	SURF4		PRDX1		GM15915	OLFR612	HDAC11		STMN1
	MUL1	4933425L06RIK		MRPL17	CREG1	CINP		PRDX6		GM16675	KLHDC5	VMN1R24		PSMA4
	MYB	4933426M11RIK		UHRF1BP1L	CDYL	COPS7B		PSAP		IQCD	DHX33	POLR3G		PSMB6
	MYBL2	4933427D06RIK		PAPD4	NOC2L	MBD4		PSD		DCAF15	ARL5C	FUK		DYNLT1B
	MYC	4933427D14RIK		RANBP2	NUDT15	MRPS7		PSEN1		D17H6S53E	AA543186	ART2A-PS		SLC29A1
	MYCN	4933427E11RIK		WDR1	LAMTOR2	BRD7		PSMB2		OLFR1061	MIR542	IFI27L1		DBI
	MYO10	4933427I04RIK		TPCN1	B4GALT3	MBD1		PSMB3		RGNEF	GM5868	OBSCN		NDUFB6
	NANOG	4933428G20RIK		MYPOP	IMP3	GEMIN7		PSMB4		SLCO1A1	GSC2	FAM163B		UQCR11
	NAV2	4933430I17RIK		CRBN	THOP1	TSEN34		PSMB5		NSUN3	OLFR16	GAS2L2		ST13
	NDFIP1	4933436I01RIK		HDHD3	TMEM5	SMU1		PSMB6		EAR5	TMPPE	TUBB4B		UBXN1
	NEURL1B	5031425E22RIK		IST1	XPC	AATF		PSMC1		4930524L23RIK	RPS4X	IFI204		GM5643
	NFKB1	5031434C07RIK		MRPL11	SF3B2	PAIP1		PSMD2		1700125G02RIK	A530006G24RIK	6430704M03RIK		ANP32B
	NFKBIA	5033411D12RIK		C16orf13	GTF2F1	DNAJC19		PSMD7		CCDC32	2010002M12RIK	MTERFD3		EIF4B
	NGDN	5330417H12RIK		TOMM6	ZNF641	VPS26B		PSMD8		RNF4	1700007F19RIK	GMPR2		ATP5D
	NKAIN1	5430403G16RIK		GRIPAP1	SCAMP3	OGFOD3		PSME1		COL9A3	GM3646	SLC7A13		PSMD2
	NKX1-1	5430427O19RIK		AARS2	PIK3CB	HEXDC		PTDSS1		MMP23	XRCC3	GM3750		ATF4
	NLRP12	5430435G22RIK		PIGX	PNPLA8	PCID2		PTMA		GPR162	PDE5A	OLFR17		NONO
	NMNAT2	5530401A14RIK		SNX9	ATPIF1	TRNAU1AP		PTP4A2		SERPINF2	OLFR44	OLFR1130		CYC1
	NOL11	5730522E02RIK		CNIH	COMMD1	TMEM251		PTPN6		OLFR433	CCDC146	MSH3		PRELID1
	NPHS1	5730522E02RIK		RIPK1	TARDBP	OSBPL2		QARS		GM14207	CUX2	VMN1R15		NUTF2-PS1
	NR5A2	5830411N06RIK		HPS6	UBE2N	USP8		RAC1		CEP192	COL6A2	4930480M12RIK		HDGF
	NRG2	5830418K08RIK		RPS19BP1	GSK3B	HIST1H2BC		RBPMS		FAM173A	4930417G10RIK	OLFR1287		TALDO1
	OLFR90	5930403N24RIK		AKT1	RBM27	RARS		RER1		BCDIN3D	SLITRK1	GM10635		NUDC
	OOEP	5930422O12RIK		TSPAN31	FBXW11	SNAPC3		RFTN1		CSDC2	RHOX5	DHX9		NHP2
	OPA1	6030419C18RIK		BCL2L2-PABPN1	COPA	COG4		RHOA		BRCC3	CTF2	CHRNB3		UBA1
	OTX2	6030445D17RIK		C12orf45	HNRNPF	ZNF641		RPA2		EPN3	RHOX4C	RHOX2C		ATP5G1
	PACRG	6030452D12RIK		PRPF8	SLC35B2	TMBIM6		RPL10A		MLLT10	HMGCL	MIR344D-2		SNRNP70
	PAG1	6030458C11RIK		ACAD9	TMEM33	EIF4G3		RPL11		FAM161A	OLFR809	TMCO3		SWI5
	PAIP2B	6030469F06RIK		ZNF397	STXBP3	IFRD1		RPL12		VMN1R-PS79	1700109G15RIK	LYZ1		SRM
	PDE1B	6030498E09RIK		PARP1	SUB1	HYPK		RPL13		ARID5A	GZMN	DCTN5		SNRPB
	PDE4D	6330403L08RIK		NUP54	DOHH	MEF2A		RPL13A		DEFB20	ZFP606	ATAD2		GDI2
	PDE4D	6430503K07RIK		ACOX3	LSM14A	CSGALNACT2		RPL14		MAPK14	CGRRF1	GM10666		PSMA3
	PGS1	6430548M08RIK		TTC33	TANGO6	TDRD3		RPL17		PRDX3	ADAM32	SMARCE1		SNRPC
	PHC1	6430573F11RIK		GNB1	ERICH1	ZHX1-C8ORF76		RPL18		SLC22A7	GM8234	OLFR521		DDT
	PIAS3	6720489N17RIK		SAP30	TMEM115	C9orf37		RPL18A		GM19990	SLC6A2	KCNMB3		SNX3
	PIGL	8030423J24RIK		FAM200A	SNRPB2	RNF10		RPL19		MBOAT4	MIR31	2900060B14RIK		AES
	PIM1	8430408G22RIK		IVNS1ABP	KLHL8	TUBGCP4		RPL21		PIGP	OVCA2	INPP5K		GARS
	PIPOX	8430410A17RIK		SCOC	TBC1D7	TMEM248		RPL23		1700057K13RIK	AOX1	KRTAP13		PMM1
	PIRT	8430419L09RIK		ZNF281	NIP7	PTEN		RPL24		RNU6	WFDC15B	CPPED1		TAGLN2
	PITPNC1	8430427H17RIK		SMG8	TTC33	CENPB		RPL27		DNALC4	FPR-RS3	GALNT12		2210409E12RIK
	PLEKHG6	9030617O03RIK		SNRPB	HMG20A	DDX3X		RPL27A		PNPLA1	MIR467A-3	CES2B		RUVBL2
	PODXL	9030624J02RIK		ZFAND6	MRPL30	SSSCA1		RPL28		MIR29A	0610007P08RIK	TRIM9		DNAJC8
	POFUT2	9130008F23RIK		STIP1	NAA10	C2orf49		RPL29		4932411G14RIK	LOC380994	DCBLD2		ARL6IP1
	POLR2A	9130011E15RIK		MON2	PRKAB1	CSRP2BP		RPL3		MAT2A	ZFP459	MUT		DDX39B
	POLR2E	9230019H11RIK		RAB10	RXRA	ITGB1		RPL31		RPL23	IFI47	COLQ		S100A11
	POMT1	9230102O04RIK		C1orf109	RCN2	SRP72		RPL32		COPG2	PCDHB5	2810008D09RIK		NARS
	POU5F1	9230109A22RIK		ZNF280D	RPS24	RAB5B		RPL34		FSHB	HBXIP	VMN1R70		TPI1
	PPP1R1A	9330101J02RIK		CUL1	MRM1	AKT1		RPL35		SKINT7	2610001J05RIK	GDF5		CCNB1
	PPP2R5C	9330171B17RIK		MBTPS2	FAM118B	UCK1		RPL35A		LRP5	ZFYVE16	OLFR697		MYBBP1A
	PRDM1	9330182L06RIK		HDAC2	CLCN3	CPNE1		RPL36A		ALDOC	ST6GALNAC6	MIR2861		TIMM23
	PRDM14	9430007A20RIK		POLE4	WDR1	UBA3		RPL36AL		FAM149A	VMN1R86	NEDD8		ADH5
	PRODH2	9430020K01RIK		FOXK2	MLST8	FBXO22		RPL37A		SUCLG2	CLEC7A	MIR338		MARCKSL1
	PRRC2B	9430023L20RIK		SRSF7	STK16	RPN1		RPL38		GM10439	KIF9	DNAHC10		ARF1
	PSMA6	9430038I01RIK		EIF3H	PARP1	ZHX3		RPL39		CNRIP1	OLFR1283	OLFR135		NDUFA6
	PUM1	9530002B09RIK		CKAP4	TRPC4AP	WDR44		RPL4		UPF3B	CRAT	MIR26A-2		SNRPD1
	PURA	9530068E07RIK		TOX4	CIAO1	PPP2R2A		RPL41		VMN1R44	GM13119	2810405K02RIK		RSL1D1
	PWP1	9630014M24RIK		WBP11	LRRC8A	LETM1		RPL6		1200009I06RIK	SVOP	C920021L13RIK		DYNLT1A
	PYCR2	9630033F20RIK		KCTD21	GALNT1	PRDX3		RPL7		RBM6	SLC16A2	SIRT5		CANX
	QK	9630041A04RIK		EMC10	MBD1	HN1L		RPL7A		CYP4A29-PS	MSH5	GM13871		DCTPP1
	RAB12	A130050O07RIK		GNL3	CPNE2	MRPL42		RPL8		RAB7	REX2	MITD1		HPRT
	RAD23B	A1BG		AK3	CPSF2	SPPL3		RPL9		MIR218-1	OLFR1532-PS1	POU6F1		NEDD8
	RALGPS1	A230065N10RIK		PSMC6	GLT8D1	MRS2		RPLP0		VMN1R66	ITM2C	GM4598		CD63
	RANBP17	A230072I06RIK		TSG101	SHARPIN	CXXC5		RPLP1		TMEM121	RDH13	VMN1R71		TOMM6
	RAP1GAP	A2M		NELFE	COQ2	MOGS		RPLP2		TRAPPC1	SLC25A22	EVI2A		NOP56
	RARA	A330008L17RIK		PPP2R4	PANK4	ERH		RPN2		FBXO48	1700019E08RIK	TUBB5		2700094K13RIK
	RBFOX2	A330050F15RIK		EIF5AL1	HAUS3	FBXW2		RPS10		PRAMEF17	OLFR547	GM5771		GLUL
	RBPJ	A330070K13RIK		ACVR1	CDK12	FPGT		RPS11		4930563E22RIK	OLFR1132	PSMB6		NDUFS6
	RBPMS	A3GALT2		PSMD9	WDR89	MKI67IP		RPS14		RNF24	1700119H24RIK	AA545190		COPZ1
	REEP3	A430005L14RIK		CUL4A	RRNAD1	LACTB		RPS15		WFDC5	GM41	SIGIRR		PHLDA2
	RHOF	A430093F15RIK		PHF12	SUMO3	MZF1		RPS15A		GM3264	SOD3	LOC100039574		KARS
	RPAP3	A4GALT		SPOP	SNRNP25	USP7		RPS16		SPN	TFAP4	AY512931		LRRC59
	RPL14	A530021J07RIK		PSEN2	EFCAB14	RNF103		RPS17		B230208H17RIK	DIDO1	PACS2		NGFRAP1
	RPL36-PS3	A530053G22RIK		BRIX1	WSB2	ABCB7		RPS18		PLOD1	GM3258	ARL11		PSMA1
	RPL37A	A630001G21RIK		RFC2	POMP	CUTA		RPS19		VMN1R191	E2F4	H2-Q2		NDUFB8
	RPS18-PS3	A730013G03RIK		USP5	CSNK1D	NSUN2		RPS2		GM10096	HILS1	KLHL12		CSDA
	RPS2-PS6	A730017C20RIK		NQO2	POLDIP2	SAMM50		RPS21		1700081H04RIK	OLFR406-PS	0610040F04RIK		U2AF2
	RTP3	A730018C14RIK		HINFP	FDPS	MRPS21		RPS23		KAT2A	4930556J02RIK	FBXO6		CKS1B
	SALL1	A730020M07RIK		UBA5	WDR46	POLR3C		RPS25		5730416F02RIK	LGI3	1700040L02RIK		FKBP3
	SALL4	A730045E13RIK		DENND4A	RNH1	PPP2R3C		RPS26		CCDC107	CES2A	WWP2		FCF1
	SCYL1	A730049H05RIK		NSUN5	CXorf56	ARIH2OS		RPS27A		CYP4F17	CCDC159	GM13304		MYL12A
	SEC14L1	A830005F24RIK		NDUFAF2	ISY1	MDP1		RPS28		GM221	9130017N09RIK	ASCL3		EIF3I
	SEMA4B	A830018L16RIK		UBXN4	ANAPC2	TAPT1		RPS29		RILPL2	1700055C04RIK	CYP2J9		CKS2
	SERBP1	A830073O21RIK		TNKS2	ATAD1	PAM16		RPS3		A430033K04RIK	SAMD9L	4930404I05RIK		EIF3G
	SERP2	A930002H24RIK		SGMS1	UQCRC1	PCBP1		RPS3A		2210403K04RIK	NLN	OLFR1036		HNRNPA1
	SETD1B	A930003A15RIK		DNAJB12	TEX2	DDB2		RPS5		IGF2R	COX16	GM4285		MDH1
	SEZ6	A930005H10RIK		PATL1	PLRG1	STK16		RPS6		OLFR1118	UBE4B	OLFR1262		POLR2F
	SGK1	A930009A15RIK		MUL1	MYNN	C1QBP		RPS7		1700007P06RIK	ZFP101	VMN1R3		PSAP
	SGSM1	A930011G23RIK		SIRT6	UBE2D4	SERINC3		RPS8		ZCCHC14	GM13871	1700020N15RIK		1810035L17RIK
	SHISA7	A930018M24RIK		POLR2A	ATF4	FAM63A		RPS9		KLHL1	GM17757	BC003331		PABPN1
	SIK1	A930018P22RIK		BRE	MED4	WDR18		RPSA		2310007L24RIK	TRDMT1	LOC382133		RAB7
	SKI	A930039A15RIK		PLA2G12A	PPP2CB	CTNNA1		S100A10		MAGEB1	GM10394	CNTROB		HNRNPA0
	SLC16A14	AA386476		STUB1	RFC2	RTFDC1		SARS		OLFR52	MIR470	TC2N		HIGD2A
	SLC2A1	AB041803		RNF146	APTX	CHMP1A		SCN1B		5730577I03RIK	GANAB	TLE6		EIF4G1
	SLC2A3	AI413582		XPO7	CCDC47	ZNF3		SEC61B		2700078E11RIK	4931420L22RIK	GM14872		ETF1
	SLC4A1	AI429214		EWSR1	C12orf57	PSMC6		2002-09-01		BC147527	CCR5	OLFR155		GART
	SLC6A6	AI481877		PSMD13	RPL32	LRFN3		SEPW1		MANF	LONRF3	2410016O06RIK		ADRM1
	SLCO5A1	AI593442		ZBED6	NR3C2	AURKAIP1		SERPINA3		KLHL23	ATAT1	MIR411		RNPS1
	SMAD7	AI846148		LSM14A	ASCC1	C20orf111		SERPINB6		HSPA1L	RHOX3F	RAB40C		ADPRH
	SMARCAD1	AU023871		MNAT1	NAE1	GSTK1		SET		D830030K20RIK	4930545H06RIK	4933422H20RIK		SHMT2
	SMIM12	AU040320		EID2	MFSD5	SEC22B		SF1		ATG9A	TMEM202	TRAPPC3		SDHD
	SMIM20	AU041133		TMBIM4	UBE2L3	DIEXF		SF3B2		OTTMUSG00000016609	METRNL	TMEM151A		PPP2CA
	SMNDC1	AW112010		BIRC2	ARPC5L	ZNF394		SLC25A3		PPP2R5B	PKHD1L1	PATL2		PSMC4
	SNTA1	AW146154		PSME3	DAP3	HDLBP		SLC25A5		CATSPER3	TMEM219	STX6		EIF3B
	SOCS3	AW551984		CHD4	CASP9	EIF2A		SLC25A6		HMGCS2	6330418K02RIK	NAT14		1110038B12RIK
	SOGA2	AW554918		MCAT	ANAPC11	SCAF11		SLC6A8		CDC42	PKN1	SNORD14C		EIF4A3
	SOX2	AY702102		CLP1	PIK3R4	DDX39B		SNRNP70		1700037H04RIK	DDB1	ARL9		PRAF2
	SPACA7	AACS		ZNF146	SNX18	MTO1		SNRPD2		AGBL5	KRTAP6-1	ANO10		CS
	SPATS1	AAK1		CHP1	C17orf59	ATP6V0B		SOD1		PHF16	FBXO43	GM14431		TOMM22
	SPEN	AAMDC		NIT2	DLG1	CARS2		SON		OLFR891	AFAP1L1	TAS2R144		BIRC5
	SPRY2	AANAT		FIS1	DNAJC11	WDR26		SPTBN1		SLC24A3	PCDHGA4	NCF4		CSDE1
	SPRY4	AAR2		CCDC124	PLGRKT	GPR107		SQSTM1		OLFR1062	4931417G12RIK	CCDC85C		VPS35
	SPTSSA	AARD		CHD1L	TMEM179B	ATF1		SRP14		ZFP828	RGS14	AQP8		GM13242
	SRP9	AARS2		QARS	DALRD3	RPL4		SSB		BC051070	JUB	MIR1933		HNRNPM
	SRSF3	AASDH		RMND5B	SIGMAR1	URI1		SSR2		2810011L19RIK	4930444F02RIK	MAFG		MTHFD1
	SSR2	AASDHPPT		TOMM22	METAP1	DERA		STAT3		MIR101A	FBXO38	IQCE		LSM7
	STOML1	AASS		ZADH2	ST3GAL2	CEP57		STMN1		CCDC142	KISS1	THOC6		SH3BGRL3
	SULF2	AATF		KXD1	TM9SF3	CSNK1A1L		STOM		ACTL7B	SRR	OLFR980		GHITM
	TAF8	ABCA1		CYC1	DSCR3	MAP2K2		SURF1		OLFR230-PS1	TNR	5730455O13RIK		MCM4
	TBX3	ABCA12		RFXANK	MCEE	PIGF		TAGLN2		2610206C17RIK	RSPH9	TNFSF9		PPP2R1A
	TBX5	ABCA13		RANBP6	DRAM2	ANKRD39		TAX1BP1		4930529L06RIK	4933403F05RIK	SERPINB3A		VAPA
	TCF15	ABCA16		ECH1	TAF11	HEATR2		TCEA1		OLFR1317	MIRLET7A-2	OLFR51		ISYNA1
	TCF7	ABCA4		CCDC12	UPF2	C1orf50		TMBIM6		MIR184	MIR5123	TIRAP		LAMTOR2
	TDGF1	ABCA5		ARIH1	TMEM62	CNOT11		TMED10		2010003O02RIK	BMP8B	QRFPR		CBX3
	TDH	ABCA6		ITPKC	ANKHD1-EIF4EBP3	NAT10		TMSB10		ZBTB26	OLFR1104	GM17252		CSTB
	TEAD1	ABCA8B		BBS4	AGPAT3	EXT2		TMSB4X		OLFR724	AW146020	SNORD1B		BOLA2
	TET1	ABCB10		TAF4	IWS1	IER3IP1		TPR		DEFB2	WNT1	PLCD4		SSB
	TET2	ABCB11		CREB3	TM9SF2	CD82		TPT1		MIR1196	GM2447	MYOZ3		OST4
	TEX36	ABCB5		TMEM230	ZNF280D	EXOSC4		TRAF4		ZC3H12D	GM6026	SORD		CSNK2B
	TFCP2L1	ABCB7		CAPRIN1	EMC1	ZNF384		TRIM28		PHLDB2	PPP1R14C	ARHGEF38		TAF9
	TGIF1	ABCC12		HNRNPA2B1	VPS28	FAM120B		TUBB		HERPUD2	ATG12	ARHGAP36		EWSR1
	TLR1	ABCC2		MTMR6	DDX21	ZCCHC3		TXN		OAS2	OLFR410	HRSP12		DNAJC21
	TMEM131	ABCC4		ALYREF	WDR12	WDR41		TXNIP		TAS2R122	SRXN1	GM4759		REX2
	TMEM2	ABCC5		APOPT1	PABPN1	MRPL3		UBA1		GALNT4	ALDH18A1	AQP7		PTMS
	TMEM220	ABCC9		EIF3A	VPS26A	CNST		UBA52		ZBTB5	LOC382133	GM6116		6430527G18RIK
	TMEM260	ABCD2		PHB2	B4GALT5	VARS2		UBB		MYH15	APOC2	ABHD3		PSMD8
	TMEM51	ABCD3		WARS2	PHB	MRPL17		UBC		PLXNB2	TLCD2	OLFR488		PAIP2
	TNIP1	ABCD4		SLC20A1	MRPS15	FEZ2		UBE2C		C330011F03	PCDHGB5	OLFR134		RBM39
	TNS3	ABCF1		NACC1	ZCCHC7	ANXA7		UBE2D3		SLC5A8	CD209A	CD40LG		ARPC3
	TRAK1	ABCG1		SETD2	KXD1	PCBP2		UQCRB		ODF2L	OLFR206	SNORA17		ARHGDIA
	TRIM33	ABCG8		LETMD1	TMEM19	GCDH		UQCRH		ZFP9	4930423M02RIK	FAM154B		GLTSCR2
	TRIM71	ABHD11		DHX9	CSTF1	MFF		USP11		SNORD90	DNTTIP1	ZSWIM7		GNL3
	TRPM1	ABHD17B		C6orf89	AZI2	ATL2		VDAC2		RIMKLB	D930016D06RIK	SNORD85		PPP4C
	TRPM3	ABHD2		BFAR	BCLAF1	RBM33		VIM		MDN1	METTL2	C030016D13RIK		MAT2A
	TSC22D1	ABHD5		RIN2	VRK2	NACC2		VPS72		GM10377	RDH5	PABPN1L		GM6682
	UBE2S	ABHD6		EPN1	XRCC5	EIF2AK1		WARS		C230004F18RIK	WDR81	E230029C05RIK		LSM4
	UBQLN4	ABI1		TRUB2	TAF1D	AFF4		XBP1		PCDHB17	EBF4	MICALL2		RPA1
	UBTF	ABI2		TSR1	ST6GALNAC6	CDC123		XPO1		TIE1	GM14405	4930448K20RIK		PSMD13
	UCK2	ABI3BP		TRIP12	TOMM20	TMED7-TICAM2		YBX1		NIP7	ADHFE1	GM3002		ACO2
	UCK2	ABL2		APIP	LSM14B	ARCN1		YWHAB		PYDC4	SNORA7A	A330009N23RIK		NDUFC1
	UPP1	ABLIM1		BOD1	PSMA6	C14orf1		YWHAH		GATC	OLFR1109	ARSB		TCEB1
	URI1	ABLIM2		YWHAB	TSC2	NOC2L		YWHAQ		GM15772	ZFP644	GM13011		GM15645
	USP1	ABO		MRPS5	RHBDD1	GSTM4		YWHAZ		OLFR128	PRPMP5	PNPLA5		6820431F20RIK
	USP20	ABR		CDK5RAP1	PEX13	COMMD10		ZFP36		P4HTM	OLFR376	PRL7B1		APRT
	USP48	ABRA		C6orf120	EIF2S2	DYNLRB1		ZNF91		GM773	GM2694	MYOG		TXNIP
	USP7	ABRACL		C2orf47	BRK1	AP4B1				GM18409	IDI2	2400009B08RIK		MRPS16
	UTF1	ACACA		TBC1D7	FIZ1	ZNF687				RSL1D1	ZFP398	4933411K16RIK		DDX39
	VASH1	ACACB		C14orf2	NISCH	TRMT10C				SGMS2	LSM12	4930467K11RIK		XPO1
	VDAC1	ACAD11		ALKBH5	FAM3A	PRDX5				ACTR6	ZBTB46	SLC25A32		UBE2I
	VWA3B	ACADM		DRAM2	ENTPD4	QTRT1				VMN1R168	MIR7-1	MIR193		PPID
	WBSCR27	ACADS		EIF4A1	ORC4	STT3B				DPP8	MIR669I	GM14920		TMBIM6
	ZBTB34	ACAN		MMADHC	ATXN10	STAM				1810009A15RIK	D730048I06RIK	ARFGAP2		TOMM7
	ZBTB43	ACAP2		RNF14	RPL10A	RNF31				TMPRSS7	VBP1	UBA1		CENPA
	ZBTB45	ACAT1		D2HGDH	CMAS	PIK3R4				TTC1	NOM1	AP1G1		CDV3
	ZDHHC25	ACBD6		FAM122A	BAG4	EGLN2				GM12191	FABP12	2010009K17RIK		TOP2A
	ZFHX2	ACCS		PRDX6	ZNHIT3	MCPH1				EIF3B	HDDC2	VAX1		SARNP
	ZFML	ACCSL		CNNM2	MTFR1L	GOLGA5				VMN1R189	6430548G04	1100001G20RIK		GOT1
	ZFP281	ACER2		TIMM10B	MAPKAP1	BRPF3				OLFR201	6030466F02RIK	OLFR504		MYLPF
	ZFP42	ACLY		CDK13	UBL3	IRGQ				MIR615	B330016D10RIK	FOXG1		SPINT2
	ZFP57	ACO1		MGAT4B	FXN	PPP2CA				MTERFD2	CXCL16	LRRC43		1810009A15RIK
	ZFP64	ACOT1		MRPL21	EIF5B	PNPT1				VMN2R44	MED7	CYP4F39		GNB1
	ZFP704	ACOT10		EIF2B3	AGGF1	LAMTOR5				MBD3L1	CD248	GM3500		NDUFB11
	ZFP710	ACOT11		ZNF410	C17orf58	AGPS				SAMD4B	KIF23	EXOC3L		ANAPC5
	ZNRD1AS	ACOT3		C4orf3	UBOX5	CRNKL1				OLFR1337	GM14483	TCSTV1		ATP6V1F
		ACOT4		SPG7	NUDCD2	SCYL3				SKINT4	GM1821	KLHDC1		SERPINH1
		ACOT5		HS2ST1	MKI67IP	MRPS6				GM15093	HRG	ADCY4		EMG1
		ACOT7		RCAN1	EIF2B5	CNOT7				NOL3	GM5801	PCDHB21		ILF2
		ACOX2		ABHD14A	CWC15	COA1				AMTN	ZFP160	GM13710		RNF4
		ACOXL		MAN1A2	POLE3	PPAN-P2RY11				FCAMR	PCDHA2	WDR18		NDUFV1
		ACP5		SDHB	OXA1L	CARKD				NOP56	MIR743B	SLC22A28		RNASEK
		ACP6		REST	STRN3	DNTTIP1				TNP2	CTDNEP1	ZFP235		QARS
		ACPL2		DDX24	SNRNP27	UQCC				4931414P19RIK	CD177	V1RA8		EIF4H
		ACPT		ZNRD1	FBXL17	AP2A2				GM10058	SF3A3	LTK		BEX4
		ACSBG2		EIF2AK4	ATF7IP	CCT4				TEDDM1	HAGH	DUS4L		CALU
		ACSL1		UQCC	L3MBTL2	CPD				AMH	GM8660	REXO1		ATP6V1G1
		ACSL4		HNRNPH2	ALAD	PEX14				6030405A18RIK	2410127L17RIK	GM6907		PSMC6
		ACSL5		NACA	CKAP4	DCUN1D3				GM14692	FGF2	1700017J07RIK		TRAP1A
		ACSM1		MRPS23	UBE3A	VAC14				OLFR76	CKMT1	1300001I01RIK		SRRM1
		ACSM2		ADCK2	PNPT1	FASTKD5				DOLPP1	UTP20	FBXO18		NDUFA2
		ACSM5		VPS52	ATIC	TMCO1				CES1A	RAB18	SNORD73A		EDF1
		ACSS1		ARHGDIA	PSMC6	PTGES3				RHOD	ADCK3	MIR344B		GANAB
		ACSS2		HCFC1	DIABLO	DBT				RNF151	ADAT2	HRCT1		PSMD3
		ACTA2		LGALSL	RNF25	ECSIT				RPS6KA3	AKP3	9230112J17RIK		SLC6A8
		ACTBL2		NUDT15	MRPS30	SSU72				CCDC122	VMN1R67	RHOX12		CDK2AP1
		ACTC1		TACO1	ANAPC13	LYSMD3				MSMP	UBTFL1	HTR4		TIMM8B
		ACTG1		NMRK1	FLCN	TRAPPC3				GAPDHS	9030418K01RIK	IL18R1		AP2M1
		ACTL6A		RRP36	ALYREF	ANXA6				PDCD1LG2	SPZ1	SPATA7		SF1
		ACTN1		ATF7IP	ZCRB1	BCL2L1				OLFR329-PS	CCDC62	GM7854		BCKDHA
		ACTN4		VPS28	FBXO11	CTTN				UGT2B37	RHPN1	ZFP300		SQSTM1
		ACTR2		ZCCHC11	RPL27	UTP14A				OLFR2	GPS2	BCL2A1A		RAB5C
		ACTR3B		HAUS4	VBP1	NGDN				1110050K14RIK	TTC39D	DPF2		FDPS
		ACTRT2		NSA2	SLIRP	EMD				4930524N10RIK	1810020D17RIK	GLI1		DDX21
		ACTRT3		NDUFA5	CAB39	VMA21				GM7104	PPIL2	UTP15		IMMT
		ACVR1		ANKFY1	AKIP1	ATG13				UBE1Y1	SSXB5	MIR345		DHX9
		ACVR1B		MFSD5	AKTIP	LRSAM1				GM9855	ZBTB3	ANKS3		SF3B2
		ACVR2B		NUCKS1	PFDN2	HIGD1A				RHBDF1	MIR3970	OLFR101		TXNL4A
		ACYP2		INF2	ZNRD1	ARMC7				RAB2A	FAM40B	OLFR151		SF3B4
		ADAM10		DYNC1LI1	SYPL1	POLD2				ABCB4	TRIM69	FKBP9		PPP1R14B
		ADAM12		U2AF1L4	NSD1	MYBBP1A				1700039E22RIK	1700001L05RIK	D6ERTD527E		GM10052
		ADAM17		PYURF	TRNT1	ADK				ZDHHC7	SNORD116	TAS2R104		LIG1
		ADAM19		HNRNPU	TMEM248	FAM136A				TREX1	RPL37	1700022E09RIK		CMTM7
		ADAM1A		DERA	KIAA0947	PUM1				ZFP511	ZKSCAN3	OLFR883		MARS
		ADAM2		MUS81	NDUFS7	SCP2				D2HGDH	DCXR	OLFR1094		NDUFV3
		ADAM22		PPP1R10	DDX59	DAXX				ZFP709	LRRC61	C630020P19RIK		GRN
		ADAM23		ZBTB6	ZNF593	MINOS1				THBS3	ADAM4	DEFB26		SUPT16H
		ADAM7		VARS2	SUGP1	NOP56				GM13040	ZBTB17	SVS3A		POGLUT1
		ADAMDEC1		ZNF480	UBA3	KAT2B				VEGFB	INTS5	HTRA3		ABCE1
		ADAMTS10		C11orf83	PEX12	SLC38A2				SNHG12	VMN2R13	MIR30A		ASH2L
		ADAMTS12		CHMP5	SAP30	MIF				DEFA17	TRANK1	OLFR211		SSRP1
		ADAMTS14		ETF1	KIAA1191	LYRM5				TOR1AIP2	VMN1R139	NEK8		NPM3
		ADAMTS15		RRM1	ATP5C1	LRRC42				GARS	PPP3CB	MAN1B1		2015-09-01
		ADAMTS18		TMEM189-UBE2V1	MAN2C1	C12orf65				RABGGTA	PRSS57	VMN1R195		PPIL1
		ADAMTS19		MRPL3	GPAA1	HSPA5				SYAP1	CCDC114	GM2863		PSMC3
		ADAMTS20		LNX2	MAPK8	HBP1				PADI4	C130079G13RIK	BC030870		IDH3G
		ADAMTS3		CCT6A	LAMTOR4	UCKL1				TMEM150B	OLFR619	GM6682		M6PR
		ADAMTS6		SRSF3	SPG11	HSPA14				RASSF1	MIRLET7G	TM4SF1		ZFP207
		ADAMTS7		PIGK	SAR1A	ATG12				IFIT2	CLIP3	VMN1R135		PFDN2
		ADAMTS8		GTF2I	MIIP	CLK3				TMX2	CFHR2	1810007C17RIK		NME1
		ADAMTS9		MBNL2	EXOSC1	MRPL16				TPRGL	6530402F18RIK	KIF21B		CDC20
		ADAMTSL1		SETD6	DNAJC3	WDR5B				FOXF1A	DGKQ	ZFP873		2002-09-01
		ADAMTSL3		EIF3G	C14orf1	SARS				GM11545	OLFR984	NFE2L3
		ADAMTSL4		FBXL17	GOLGA7	POLR3GL				RORC	FAM161B	ALOX5
		ADAP1		BLZF1	NCOA6	CLCC1				TMEM98	VMN2R62	GM11837
		ADAP2		ANKRD39	IDH3G	COPG1				OLFR790	ZCCHC12	PDE2A
		ADAR		PABPN1	POLL	XRCC6				1810027O10RIK	SLC18A3	SMCP
		ADARB2		CMAS	NCSTN	GABARAP				SIN3B	MAGOHB	KRTAP4-16
		ADC		TAMM41	JOSD2	ZSWIM7				4930401O12RIK	KIFAP3	KRT71
		ADCK1		TMEM186	C11orf58	CDV3				OLFR170	FLRT2	MIR883B
		ADCY1		CMC2	PIGU	MAD2L1BP				AMY2A5	TRIM6	VMN1R113
		ADCY10		PNPO	DGCR2	VPS26A				RHOX2F	1700042B14RIK	LETM1
		ADCY2		ACOX1	COPZ1	LRPPRC				A330021E22RIK	5430402O13RIK	GM10391
		ADCY3		PPM1A	STUB1	SLC25A32				HOXB8	CCDC153	ZFP28
		ADCY5		DCTD	KHNYN	UQCR10				DNAJC16	PAK2	GM1332
		ADCY8		TIMM21	FAM120A	PSPC1				GPR146	SYT3	STAT1
		ADCY9		ZC3H18	COQ6	RFK				PLP2	PHPT1	MIR804
		ADCYAP1		SEC16A	APH1A	NRIP1				TMEM223	BC057079	TNF
		ADCYAP1R1		TMEM214	TSNAX	ABHD10				SNHG3	MIR421	OLFR819
		ADD3		ATP6V0E1	PCMT1	CD164				LPCAT4	RPL36	RHOQ
		ADI1		WDR44	PEX2	ZNF174				PCDH12	CEACAM5	TIMD4
		ADIG		ECHS1	RBAK	ZBTB8OS				SOHLH1	2610306M01RIK	GLYCTK
		ADIPOR2		FAM175B	NSMCE2	FCF1				E330017L17RIK	C87198	VMN2R95
		ADK		HMG20B	SPG7	TIMMDC1				SF3B2	FAM171A2	MIR365-2
		ADM		LENG1	TP53RK	RNASEH2C				AP3M1	HAX1	IRF5
		ADNP		CENPT	TOMM70A	SUMO1				NPHS2	GM5643	PRSS29
		ADNP2		SLC25A39	UTP11L	UBE3A				COG1	MIR381	USH1C
		ADORA1		MRPL36	MMS19	ALG5				IFNZ	OLFR960	TFCP2
		ADORA2B		MRPL48	MTMR6	FAF1				SBK2	MUP3	KRTAP20-2
		ADRA1A		TMEM57	FKBP8	ASCC3				OLFR315	1200011I18RIK	TOX4
		ADRA1B		UEVLD	MRPS31	MICU1				RAB23	HIST2H2AC	PCP2
		ADRA2A		RPL27	TCF25	TYK2				SLC27A5	ZFAND6	ACSL3
		ADRB1		YIPF5	ACOT9	ETF1				GFAP	OLFR1131	IL19
		ADRB2		DHX29	ITCH	TOR3A				OTUD3	USP47	GUCY2E
		ADRB3		EDC4	MAPKAPK2	EWSR1				MIR1956	A930001A20RIK	GRINA
		ADSL		NRDE2	FIBP	GSK3A				2210013O21RIK	1500003O03RIK	DUB1
		ADSS		DNAJC3	NIT2	B4GALT5				B230208H11RIK	AU019823	9130014G24RIK
		AEBP2		ASB7	DRAP1	SEC61A1				OLFR849	TMX4	6430706D22RIK
		AEN
		AFAP1
		AFAP1L2
		AFF1
		AFF3
		AFF4
		AFG3L1
		AGAP1
		AGAP2
		AGBL1
		AGBL2
		AGBL4
		AGFG1
		AGGF1
		AGK
		AGL
		AGMO
		2001-08-01
		2002-08-01
		2003-08-01
		AGPAT2
		AGPAT3
		AGPAT4
		AGPAT5
		AGPAT6
		AGPAT9
		AGPS
		AGR3
		AGRN
		AGTPBP1
		AGTR1A
		AGTR2
		AHCY
		AHCYL2
		AHDC1
		AHI1
		AHNAK
		AHR
		AHSA1
		AHSA2
		AICDA
		AIG1
		AIM1
		AIM2
		AIPL1
		AJAP1
		AK3
		AK5
		AKAP1
		AKAP10
		AKAP11
		AKAP12
		AKAP13
		AKAP2
		AKAP6
		AKAP7
		AKAP8
		AKD1
		AKIRIN2
		AKNA
		AKNAD1
		AKR1B3
		AKR1B8
		AKR1C14
		AKR1C18
		AKR1C20
		AKR1C21
		AKR1CL
		AKR1D1
		AKT2
		AKT3
		ALAS2
		ALCAM
		ALDH1A1
		ALDH1A2
		ALDH1A3
		ALDH1A7
		ALDH1B1
		ALDH3A1
		ALDH3A2
		ALDH8A1
		ALDOART2
		ALG1
		ALG10B
		ALG13
		ALG14
		ALG2
		ALG6
		ALG8
		ALK
		ALKBH3
		ALMS1
		ALOX5AP
		ALPK1
		ALPK2
		ALPK3
		ALPL
		ALPPL2
		ALX1
		ALX4
		AMACR
		AMD2
		AMDHD1
		AMHR2
		AMICA1
		AMMECR1L
		AMN
		AMOT
		AMOTL1
		AMOTL2
		AMPD1
		AMPD3
		AMPH
		AMT
		AMZ1
		ANAPC10
		ANAPC13
		ANAPC15-PS
		ANAPC4
		ANAPC7
		ANGPT1
		ANGPT2
		ANGPTL1
		ANGPTL2
		ANGPTL3
		ANK
		ANK1
		ANK2
		ANK3
		ANKAR
		ANKFN1
		ANKIB1
		ANKK1
		ANKLE2
		ANKMY1
		ANKRA2
		ANKRD10
		ANKRD12
		ANKRD13A
		ANKRD13C
		ANKRD26
		ANKRD27
		ANKRD28
		ANKRD29
		ANKRD33
		ANKRD33B
		ANKRD34C
		ANKRD36
		ANKRD42
		ANKRD44
		ANKRD45
		ANKRD46
		ANKRD50
		ANKRD55
		ANKRD6
		ANKRD60
		ANKS1
		ANKS1B
		ANKS4B
		ANLN
		ANO2
		ANO4
		ANO6
		ANP32A
		ANTXR2
		ANXA1
		ANXA11
		ANXA2
		ANXA3
		ANXA6
		ANXA7
		AOAH
		AOC3
		AOX3
		AOX4
		AP1B1
		AP1M1
		AP1S3
		AP2B1
		AP3B1
		AP3B2
		AP3M2
		AP3S1
		AP4E1
		AP4S1
		AP5M1
		AP5S1
		AP5Z1
		APAF1
		APBA1
		APBA2
		APBB2
		APC
		APCS
		APH1A
		APH1C
		API5
		APIP
		APLN
		APLP2
		APMAP
		APOA1
		APOA2
		APOBEC1
		APOBEC2
		APOBEC3
		APOD
		APOL6
		APOL7D
		APOLD1
		APOPT1
		APP
		APPBP2
		APPL2
		AQP11
		AQP3
		AQP4
		AQP9
		AQR
		AR
		ARAF
		ARAP3
		ARC
		ARF4
		ARFGAP3
		ARFGEF1
		ARFGEF2
		ARG1
		ARG2
		ARGLU1
		ARHGAP1
		ARHGAP10
		ARHGAP12
		ARHGAP15
		ARHGAP17
		ARHGAP18
		ARHGAP21
		ARHGAP23
		ARHGAP24
		ARHGAP25
		ARHGAP26
		ARHGAP28
		ARHGAP29
		ARHGAP32
		ARHGAP40
		ARHGAP42
		ARHGAP5
		ARHGEF1
		ARHGEF10
		ARHGEF10L
		ARHGEF11
		ARHGEF16
		ARHGEF18
		ARHGEF2
		ARHGEF26
		ARHGEF28
		ARHGEF3
		ARHGEF33
		ARHGEF7
		ARID1A
		ARID1B
		ARID2
		ARID3B
		ARID4A
		ARID4B
		ARID5B
		ARIH1
		ARIH2
		ARL1
		ARL13A
		ARL14EP
		ARL14EPL
		ARL15
		ARL3
		ARL4A
		ARL4C
		ARL4D
		ARL5B
		ARL6
		ARL6IP4
		ARL8B
		ARMC1
		ARMC10
		ARMC2
		ARMC3
		ARMC6
		ARMC9
		ARMCX1
		ARMCX4
		ARNT
		ARNTL
		ARPC2
		ARPC5
		ARPP19
		ARPP21
		ARRB1
		ARRDC3
		ARRDC4
		ARRDC5
		ARSA
		ARSG
		ARSJ
		ART1
		ART5
		ARVCF
		ARX
		ARXES2
		ASAH2
		ASAP2
		ASB1
		ASB13
		ASB18
		ASB4
		ASB5
		ASB7
		ASB9
		ASCC2
		ASCC3
		ASCL1
		ASCL2
		ASF1A
		ASIC2
		ASNS
		ASNSD1
		ASPA
		ASPH
		ASPM
		ASPSCR1
		ASS1
		ASTN1
		ASTN2
		ASXL1
		ATAD1
		ATAD2B
		ATAD5
		ATCAY
		ATE1
		ATF1
		ATF3
		ATF6
		ATF7IP
		ATF7IP
		ATF7IP2
		ATG10
		ATG13
		ATG14
		ATG16L1
		ATG2B
		ATG4C
		ATG5
		ATG7
		ATHL1
		ATIC
		ATL1
		ATL2
		ATMIN
		ATOH1
		ATOH7
		ATP10A
		ATP10B
		ATP11A
		ATP11B
		ATP11C
		ATP13A3
		ATP13A4
		ATP13A5
		ATP1A1
		ATP1A4
		ATP1B1
		ATP2A2
		ATP2B1
		ATP2B2
		ATP2B4
		ATP2C1
		ATP5B
		ATP5G2
		ATP5G3
		ATP5H
		ATP5L-PS1
		ATP5O
		ATP5S
		ATP6AP1L
		ATP6AP2
		ATP6V0A1
		ATP6V0C
		ATP6V0E
		ATP6V0E2
		ATP6V1B1
		ATP6V1B2
		ATP6V1C1
		ATP6V1C2
		ATP6V1G3
		ATP6V1H
		ATP8A1
		ATP8A2
		ATP8B1
		ATP8B2
		ATP8B5
		ATP9B
		ATPAF1
		ATPBD4
		ATPIF1
		ATRN
		ATRNL1
		ATRX
		ATXN1
		ATXN10
		ATXN2
		ATXN7
		ATXN7L1
		ATXN7L3
		ATXN7L3B
		AUH
		AUTS2
		AVEN
		AVPI1
		AWAT2
		AXIN2
		AYM1
		AZIN1
		B020004J07RIK
		B130006D01RIK
		B130024G19RIK
		B230120H23RIK
		B230216G23RIK
		B230307C23RIK
		B3GALNT1
		B3GALT1
		B3GALTL
		B3GAT1
		B3GNT2
		B3GNT5
		B3GNT6
		B3GNT7
		B3GNT9
		B430203G13RIK
		B430305J03RIK
		B4GALNT2
		B4GALNT3
		B4GALNT4
		B4GALT1
		B4GALT5
		B4GALT6
		B530045E10RIK
		B630005N14RIK
		B930094E09RIK
		B9D1
		BC002059
		BC005561
		BC007180
		BC018507
		BC021785
		BC023829
		BC026585
		BC026590
		BC027231
		BC028528
		BC030336
		BC030500
		BC048403
		BC048507
		BC049635
		BC049702
		BC051076
		BC051142
		BC051665
		BC052040
		BC053393
		BC067074
		BC068157
		BC106179
		BAALC
		BACE1
		BACE2
		BACH2
		BAG1
		BAG4
		BAHCC1
		BAI1
		BAI2
		BAI3
		BAIAP2
		BAIAP2L1
		BAIAP2L2
		BAK1
		BAMBI
		BANF1
		BANF2
		BANK1
		BANP
		BARD1
		BARHL1
		BARHL2
		BARX1
		BARX2
		BASP1
		BATF
		BATF3
		BAZ1A
		BAZ2B
		BBC3
		BBS1
		BBS10
		BBS4
		BBS9
		BBX
		BCAN
		BCAP29
		BCAR1
		BCAR3
		BCAS1
		BCAS2
		BCAS3
		BCAT1
		BCCIP
		BCHE
		BCKDHB
		BCL11A
		BCL11B
		BCL2
		BCL2L1
		BCL2L10
		BCL2L11
		BCL2L14
		BCL2L15
		BCL3
		BCL6
		BCL7A
		BCL9
		BCOR
		BDH1
		BDKRB1
		BDKRB2
		BDNF
		BECN1
		BEGAIN
		BEND3
		BEND5
		BEND6
		BET1
		BFSP1
		BHLHA9
		BHLHB9
		BHLHE23
		BHLHE40
		BICC1
		BICD1
		BICD2
		BIRC2
		BIRC3
		BIRC6
		BIRC7
		BLM
		BLMH
		BLNK
		BLOC1S3
		BLVRA
		BMF
		BMP2
		BMP2K
		BMP3
		BMP4
		BMP7
		BMP8A
		BMPER
		BMPR1A
		BMPR1B
		BMPR2
		BMX
		BNC2
		BNIP2
		BNIP3
		BNIP3L
		BOC
		BOD1
		BOD1L
		BOLA3
		BORA
		BPHL
		BPIFB9B
		BPTF
		BRAF
		BRCA1
		BRD4
		BRD7
		BRD8
		BRE
		BRF2
		BRI3
		BRIP1
		BRK1
		BRMS1L
		BRPF1
		BRPF3
		BRWD1
		BST1
		BST2
		BSX
		BTAF1
		BTBD10
		BTBD11
		BTBD16
		BTBD3
		BTBD7
		BTBD9
		BTF3
		BTF3L4
		BTG1
		BTN2A2
		BTNL1
		BTNL2
		BTRC
		BUB1
		BUB1B
		BVES
		BYSL
		C030037F17RIK
		C030048H21RIK
		C130026L21RIK
		C130060K24RIK
		C130073F10RIK
		C130074G19RIK
		C1D
		C1GALT1
		C1GALT1C1
		C1QL2
		C1QTNF1
		C1QTNF3
		C1QTNF9
		C230052I12RIK
		C230062I16RIK
		C2CD2
		C2CD2L
		C2CD3
		C2CD5
		C330005M16RIK
		C330007P06RIK
		C330021F23RIK
		C530025M09RIK
		C630050I24RIK
		C77080
		C77370
		C78339
		C8B
		C9
		CK137956
		CAB39
		CAB39L
		CABIN1
		CABLES1
		CABP7
		CABYR
		CACHD1
		CACNA1A
		CACNA1B
		CACNA1C
		CACNA1D
		CACNA1E
		CACNA1H
		CACNA2D1
		CACNA2D3
		CACNA2D4
		CACNB2
		CACNG2
		CACNG3
		CACNG5
		CACNG7
		CACNG8
		CACYBP
		CADM1
		CADM2
		CADPS
		CADPS2
		CALCA
		CALCB
		CALCOCO1
		CALCOCO2
		CALCR
		CALM1
		CALM2
		CALML3
		CALY
		CAMK1
		CAMK1D
		CAMK1G
		CAMK2B
		CAMK2D
		CAMK2N1
		CAMK4
		CAMKK2
		CAMKMT
		CAMTA1
		CAND1
		CAP1
		CAP2
		CAPG
		CAPN1
		CAPN11
		CAPN13
		CAPN3
		CAPN5
		CAPRIN1
		CAPRIN2
		CAPS2
		CAPSL
		CAPZA2
		CAPZA3
		CAPZB
		CAR1
		CAR10
		CAR12
		CAR13
		CAR2
		CAR3
		CAR5B
		CAR6
		CAR8
		CARHSP1
		CARKD
		CARM1
		CARS2
		CARTPT
		CASC1
		CASC4
		CASD1
		CASP1
		CASP12
		CASP3
		CASQ2
		CASR
		CAST
		CASZ1
		CAV1
		CBFA2T2
		CBFB
		CBLC
		CBLN2
		CBLN4
		CBR4
		CBS
		CBX1
		CBX4
		CBX5
		CBX7
		CC2D1B
		CCBE1
		CCBL2
		CCDC102A
		CCDC111
		CCDC113
		CCDC115
		CCDC12
		CCDC121
		CCDC126
		CCDC129
		CCDC130
		CCDC132
		CCDC138
		CCDC14
		CCDC141
		CCDC147
		CCDC148
		CCDC150
		CCDC158
		CCDC160
		CCDC162
		CCDC167
		CCDC170
		CCDC171
		CCDC172
		CCDC173
		CCDC178
		CCDC25
		CCDC27
		CCDC28A
		CCDC3
		CCDC30
		CCDC34
		CCDC37
		CCDC39
		CCDC41
		CCDC53
		CCDC55
		CCDC57
		CCDC58
		CCDC59
		CCDC6
		CCDC60
		CCDC63
		CCDC68
		CCDC71L
		CCDC73
		CCDC74A
		CCDC77
		CCDC81
		CCDC83
		CCDC85A
		CCDC86
		CCDC87
		CCDC88B
		CCDC88C
		CCDC91
		CCDC96
		CCK
		CCKAR
		CCL1
		CCL2
		CCL25
		CCL25
		CCL5
		CCL9
		CCNA1
		CCNB2
		CCNC
		CCND1
		CCND3
		CCNH
		CCNJL
		CCNL1
		CCNO
		CCNT1
		CCNT2
		CCNY
		CCNYL1
		CCR6
		CCR7
		CCR9
		CCRL1
		CCRL1
		CCRN4L
		CCSER1
		CCSER2
		CCT6B
		CCT8L1
		CD101
		CD160
		CD163L1
		CD180
		CD1D1
		CD1D2
		CD2
		CD200R1
		CD207
		CD24A
		CD28
		CD2AP
		CD300A
		CD300E
		CD300LF
		CD300LH
		CD302
		CD33
		CD34
		CD36
		CD37
		CD38
		CD4
		CD40
		CD44
		CD46
		CD47
		CD59A
		CD6
		CD70
		CD74
		CD80
		CD81
		CD83
		CD86
		CD9
		CD96
		CD97
		CD99L2
		CDADC1
		CDC14A
		CDC25A
		CDC25B
		CDC27
		CDC34
		CDC37L1
		CDC42BPB
		CDC42EP3
		CDC42EP4
		CDC42EP5
		CDC6
		CDC7
		CDC73
		CDC73
		CDCA2
		CDCA3
		CDCA7
		CDCA7L
		CDH1
		CDH10
		CDH12
		CDH13
		CDH18
		CDH19
		CDH2
		CDH20
		CDH22
		CDH23
		CDH26
		CDH3
		CDH4
		CDH5
		CDH6
		CDH7
		CDH8
		CDH9
		CDHR1
		CDHR3
		CDK1
		CDK12
		CDK13
		CDK14
		CDK15
		CDK17
		CDK19
		CDK20
		CDK5R1
		CDK5R2
		CDK5RAP1
		CDK5RAP2
		CDK5RAP3
		CDK6
		CDKAL1
		CDKL1
		CDKL4
		CDKN1A
		CDKN1B
		CDKN1C
		CDKN2AIP
		CDKN2B
		CDKN3
		CDNF
		CDO1
		CDON
		CDR1
		CDRT4
		CDS1
		CDX1
		CDX2
		CDX4
		CDYL
		CDYL2
		CEACAM1
		CEACAM10
		CEACAM11
		CECR2
		CEL
		CELF2
		CELF4
		CELSR1
		CELSR2
		CENPC1
		CENPF
		CENPJ
		CENPM
		CENPO
		CENPQ
		CENPV
		CENPW
		CEP112
		CEP135
		CEP164
		CEP170
		CEP44
		CEP55
		CEP57L1
		CEP63
		CEP68
		CEP70
		CEP72
		CEP78
		CEP85L
		CEPT1
		CERCAM
		CERKL
		CERS3
		CERS4
		CERS5
		CERS6
		CES1H
		CES5A
		CETN1
		CETN3
		CFC1
		CFDP1
		CFH
		CFL2
		CFP
		CFTR
		CGA
		CGGBP1
		CGN
		CGNL1
		CHAC1
		CHADL
		CHCHD2
		CHCHD3
		CHCHD5
		CHCHD6
		CHD1
		CHD1L
		CHD2
		CHD6
		CHD7
		CHD9
		CHGA
		CHGB
		CHIC1
		CHIC2
		CHKA
		CHL1
		CHMP2B
		CHMP3
		CHMP6
		CHN1
		CHN2
		CHODL
		CHORDC1
		CHP2
		CHPF
		CHPT1
		CHRAC1
		CHRD
		CHRDL1
		CHRM1
		CHRM2
		CHRNA1
		CHRNA10
		CHRNA4
		CHRNA7
		CHRNB1
		CHRNB4
		CHST1
		CHST10
		CHST15
		CHST2
		CHST3
		CHST7
		CHST8
		CHSY1
		CHSY3
		CHTF8
		CIB4
		CIC
		CIDEA
		CIITA
		CILP
		CILP2
		CIRH1A
		CISD1
		CITED2
		CITED4
		CKAP2L
		CKAP4
		CKB
		CLASP2
		CLCN5
		CLCN6
		CLDN10
		CLDN12
		CLDN13
		CLDN18
		CLDN19
		CLDN2
		CLDN20
		CLDN22
		CLDN23
		CLDN24
		CLDN26
		CLDN3
		CLDN4
		CLDN5
		CLDN9
		CLEC11A
		CLEC12A
		CLEC12B
		CLEC14A
		CLEC16A
		CLEC2D
		CLEC2E
		CLEC2G
		CLEC2L
		CLHC1
		CLIC4
		CLIC5
		CLIC6
		CLINT1
		CLIP4
		CLK3
		CLK4
		CLMN
		CLMP
		CLN5
		CLN8
		CLNK
		CLNS1A
		CLOCK
		CLPB
		CLPX
		CLRN1
		CLRN3
		CLSTN1
		CLSTN2
		CLTA
		CLTC
		CLUH
		CLVS1
		CLVS2
		CLYBL
		CMA1
		CMA2
		CMAH
		CMBL
		CMC1
		CMIP
		CMKLR1
		CML2
		CMPK2
		CMSS1
		CMTM4
		CNBD1
		CNDP1
		CNDP2
		CNGA3
		CNGA4
		CNN3
		CNNM2
		CNOT10
		CNOT11
		CNOT2
		CNOT4
		CNOT6
		CNOT6L
		CNP
		CNPY1
		CNR1
		CNST
		CNTF
		CNTLN
		CNTN1
		CNTN2
		CNTN3
		CNTN4
		CNTN5
		CNTN6
		CNTNAP3
		CNTNAP4
		CNTNAP5B
		COBL
		COBLL1
		COCH
		COG2
		COG6
		COIL
		COL10A1
		COL12A1
		COL13A1
		COL14A1
		COL17A1
		COL18A1
		COL1A2
		COL23A1
		COL26A1
		COL28A1
		COL2A1
		COL3A1
		COL4A3BP
		COL5A1
		COL5A2
		COL6A1
		COLGALT2
		COMMD10
		COMMD2
		COMMD3
		COMMD4
		COMMD5
		COMMD7
		COMMD8
		COMMD9
		COMT
		COPB1
		COPS3
		COPS5
		COPS7A
		COPS7B
		COPS8
		COPZ2
		COQ10A
		COQ10B
		COQ2
		COQ7
		CORIN
		CORO1C
		CORO2B
		CORO6
		COX10
		COX20
		COX4I1
		COX4I2
		COX5A
		COX6A1
		COX6B2
		COX6C
		COX7A2L
		COX7B
		COX7B2
		COX7C
		CP
		CPA4
		CPA5
		CPA6
		CPD
		CPE
		CPEB1
		CPEB3
		CPEB4
		CPED1
		CPLX1
		CPLX2
		CPM
		CPN2
		CPNE4
		CPNE5
		CPNE8
		CPNE9
		CPS1
		CPSF4L
		CPSF6
		CPSF7
		CPVL
		CPXCR1
		CPXM2
		CRABP1
		CRADD
		CRBN
		CREB1
		CREB3L1
		CREB3L2
		CREB5
		CREBBP
		CREBL2
		CREG2
		CRELD2
		CRH
		CRHR2
		CRIP2
		CRIP3
		CRISP1
		CRNKL1
		CRNN
		CROT
		CRP
		CRTAC1
		CRTC3
		CRY1
		CRY2
		CRYAA
		CRYBA1
		CRYBA4
		CRYBG3
		CRYGF
		CRYGS
		CRYZ
		CSE1L
		CSF2
		CSF3R
		CSGALNACT1
		CSL
		CSMD1
		CSMD3
		CSN1S2A
		CSN3
		CSNK1E
		CSNK1G1
		CSNK1G3
		CSNK2A1
		CSNK2A2
		CSNKA2IP
		CSPG5
		CSRNP1
		CSRNP2
		CSRNP3
		CSRP1
		CSRP2
		CSRP2BP
		CSRP3
		CST10
		CST3
		CSTAD
		CSTF2T
		CSTF3
		CTAG2
		CTAGE5
		CTBP2
		CTBS
		CTDP1
		CTDSPL
		CTGF
		CTH
		CTIF
		CTLA4
		CTNNA1
		CTNNA2
		CTNNA3
		CTNNAL1
		CTNNB1
		CTNNBIP1
		CTNNBL1
		CTNND1
		CTNND2
		CTRB1
		CTSB
		CTSC
		CTSD
		CTSF
		CTSH
		CTTN
		CTTNBP2
		CTXN3
		CUBN
		CUEDC1
		CUL1
		CUL2
		CUL3
		CUL4B
		CUL5
		CUX1
		CWC22
		CWC27
		CWF19L2
		CWH43
		CXADR
		CXCL12
		CXCL13
		CXCL14
		CXCL17
		CXCL3
		CXCR1
		CXCR2
		CXCR3
		CXCR4
		CXCR5
		CXCR7
		CXXC1
		CXXC5
		CYB5
		CYB5B
		CYB5R2
		CYB5R3
		CYBRD1
		CYCS
		CYFIP2
		CYLC2
		CYLD
		CYP19A1
		CYP1B1
		CYP26A1
		CYP26B1
		CYP26C1
		CYP2AB1
		CYP2B23
		CYP2C44
		CYP2C69
		CYP2C70
		CYP2D12
		CYP2D34
		CYP2R1
		CYP39A1
		CYP3A11
		CYP3A13
		CYP3A25
		CYP46A1
		CYP4A10
		CYP4A31
		CYP4F14
		CYP4F15
		CYP7B1
		CYPT12
		CYPT15
		CYR61
		CYSLTR2
		CYSTM1
		CYYR1
		D10BWG1379E
		D10JHU81E
		D10WSU102E
		D130043K22RIK
		D130058E05RIK
		D130062J21RIK
		D14ABB1E
		D15ERTD621E
		D16ERTD472E
		D19BWG1357E
		D19ERTD737E
		D1ERTD622E
		D1PAS1
		D3BWG0562E
		D430041D05RIK
		D630037F22RIK
		D630039A03RIK
		D630045J12RIK
		D730045B01RIK
		D7ERTD443E
		D830013O20RIK
		D830014E11RIK
		D8ERTD82E
		D930007J09RIK
		D930015E06RIK
		D930028M14RIK
		DAAM1
		DAAM2
		DAB1
		DAB2
		DAB2IP
		DACH1
		DACH2
		DACT1
		DACT2
		DAD1
		DAGLA
		DAGLB
		DALRD3
		DAP
		DAPK1
		DAPK2
		DAPL1
		DAPP1
		DARC
		DARS
		DAZAP2
		DAZL
		DBC1
		DBF4
		DBT
		DBX1
		DBX2
		DCAF11
		DCAF12L2
		DCAF4
		DCAF5
		DCBLD1
		DCC
		DCDC2A
		DCLK2
		DCLK3
		DCN
		DCP1A
		DCP1B
		DCP2
		DCSTAMP
		DCT
		DCTD
		DCTN2
		DCTN6
		DCUN1D1
		DCUN1D3
		DCUN1D4
		DCX
		DDAH1
		DDC
		DDHD1
		DDHD2
		DDI1
		DDIT4
		DDIT4L
		DDN
		DDOST
		DDR1
		DDR2
		DDX1
		DDX11
		DDX17
		DDX18
		DDX31
		DDX3X
		DDX47
[truncated: 6,197 more rows]

## Sheet: Fig 7E
Fig 7E	qPCR in CDK8/19-dKO iPS +/- CDK8-kinase dead
	Empty = pMSCV-empty vector						KD6=CDK8-kinase dead expression plasmid								JQ1 = BRD4i/JQ1 at 500mM
	Nanog /Actin	Std Dev							Nanog /Actin	Std Dev						Nanog /Actin	Normalized to S/L Mean per clone		Log2 FC per clone					Nanog /Actin	Klf4 /Actin	Tbx3 5'eRNA/Actin	Prdm14 5'eRNA/Actin		Clone and treatment
	89.2059	1.56955	dKO iPSC clone#2 +EMPTY +S/L						86.8222	6.461	dKO iPSC 3clones +EMPTY +S/L						1.02746		0.0390754					89.2059	56.7586	2.44857	0.575522		dKO iPSC clone#2 +EMPTY +S/L
	79.508	3.39788	dKO iPSC clone#3 +EMPTY +S/L						17.596	3.26782	dKO iPSC 3clones +EMPTY +S/L +JQ1 48h						0.915757		-0.126964					79.508	55.4864	2.5087	0.589653		dKO iPSC clone#3 +EMPTY +S/L
	91.7527	1.84219	dKO iPSC clone#5 +EMPTY +S/L						170.068	16.8389	dKO iPSC 3clones +EMPTY +2i						1.05679		0.0796862					91.7527	50.8219	3.41028	0.636201		dKO iPSC clone#5 +EMPTY +S/L
	21.3091	0.616396	dKO iPSC clone#2 +EMPTY +S/L +JQ1 48h						130.739	7.70543	dKO iPSC 3clones +EMPTY +2i +JQ1 48h						0.245434		-2.02659					21.3091	8.23117	0.652783	0.153432		dKO iPSC clone#2 +EMPTY +S/L +JQ1 48h
	15.1579	0.360992	dKO iPSC clone#3 +EMPTY +S/L +JQ1 48h						149.707	4.78616	dKO iPSC 3clones +KD6 +S/L						0.174586		-2.51799					15.1579	8.39599	0.566158	0.33532		dKO iPSC clone#3 +EMPTY +S/L +JQ1 48h
	16.3209	0.153859	dKO iPSC clone#5 +EMPTY +S/L +JQ1 48h						79.0916	6.57304	dKO iPSC 3clones +KD6 +S/L +JQ1 48h						0.18798		-2.41135					16.3209	10.8755	0.702185	0.165044		dKO iPSC clone#5 +EMPTY +S/L +JQ1 48h
	155.728	2.00701	dKO iPSC clone#2 +EMPTY +2i						190.915	25.7562	dKO iPSC 3clones +KD6 +2i						1.79364		0.842894					155.728	108.678	5.31031	0.786288		dKO iPSC clone#2 +EMPTY +2i
	165.866	4.50309	dKO iPSC clone#3 +EMPTY +2i						137.579	30.3581	dKO iPSC 3clones +KD6 +2i +JQ1 48h						1.91041		0.933881					165.866	115.753	5.32501	1.25161		dKO iPSC clone#3 +EMPTY +2i
	188.61	11.4345	dKO iPSC clone#5 +EMPTY +2i														2.17237		1.11927					188.61	131.626	4.29752	1.27265		dKO iPSC clone#5 +EMPTY +2i
	124.206	1.09502	dKO iPSC clone#2 +EMPTY +2i +JQ1 48h														1.43058		0.5166					124.206	104.278	3.53931	0.831893		dKO iPSC clone#2 +EMPTY +2i +JQ1 48h
	139.237	3.03502	dKO iPSC clone#3 +EMPTY +2i +JQ1 48h														1.6037		0.681403					139.237	97.1693	4.29782	0.801777		dKO iPSC clone#3 +EMPTY +2i +JQ1 48h
	128.775	2.50523	dKO iPSC clone#5 +EMPTY +2i +JQ1 48h						Normalized to S/L								1.4832		0.568713					128.775	89.8682	4.32964	1.01766		dKO iPSC clone#5 +EMPTY +2i +JQ1 48h
	149.423	1.88981	dKO iPSC clone#2 +KD6 +S/L						1	0.0744164	dKO iPSC 3clones +EMPTY +S/L						1.72102		0.783262					149.423	131.382	5.46731	1.28506		dKO iPSC clone#2 +KD6 +S/L
	145.07	3.02011	dKO iPSC clone#3 +KD6 +S/L						0.202667	0.0376381	dKO iPSC 3clones +EMPTY +S/L +JQ1 48h						1.67088		0.74061					145.07	160.708	5.32155	1.5759		dKO iPSC clone#3 +KD6 +S/L
	154.629	0.912291	dKO iPSC clone#5 +KD6 +S/L						1.95881	0.193946	dKO iPSC 3clones +EMPTY +2i						1.78099		0.832677					154.629	135.96	5.60707	1.31791		dKO iPSC clone#5 +KD6 +S/L
	81.822	3.37838	dKO iPSC clone#2 +KD6 +S/L +JQ1 48h						1.50583	0.0887495	dKO iPSC 3clones +EMPTY +2i +JQ1 48h						0.942409		-0.0855753					81.822	90.6426	3.66631	0.683965		dKO iPSC clone#2 +KD6 +S/L +JQ1 48h
	83.8594	3.87169	dKO iPSC clone#3 +KD6 +S/L +JQ1 48h						1.7243	0.055126	dKO iPSC 3clones +KD6 +S/L						0.965875		-0.0500912					83.8594	73.7345	2.00436	0.471113		dKO iPSC clone#3 +KD6 +S/L +JQ1 48h
	71.5934	0.978784	dKO iPSC clone#5 +KD6 +S/L +JQ1 48h						0.910961	0.0757069	dKO iPSC 3clones +KD6 +S/L +JQ1 48h						0.824598		-0.278237					71.5934	99.926	2.87056	0.674707		dKO iPSC clone#5 +KD6 +S/L +JQ1 48h
	182.453	1.2445	dKO iPSC clone#2 +KD6 +2i						2.19892	0.296655	dKO iPSC 3clones +KD6 +2i						2.10145		1.07139					182.453	160.424	7.29525	1.7147		dKO iPSC clone#2 +KD6 +2i
	170.454	5.25607	dKO iPSC clone#3 +KD6 +2i						1.58461	0.349658	dKO iPSC 3clones +KD6 +2i +JQ1 48h						1.96325		0.973247					170.454	118.955	7.55876	1.5828		dKO iPSC clone#3 +KD6 +2i
	219.837	6.55265	dKO iPSC clone#5 +KD6 +2i														2.53204		1.3403					219.837	172.206	8.30437	1.54921		dKO iPSC clone#5 +KD6 +2i
	167.78	2.99024	dKO iPSC clone#2 +KD6 +2i +JQ1 48h														1.93246		0.950436					167.78	92.9336	6.89399	1.2861		dKO iPSC clone#2 +KD6 +2i +JQ1 48h
	137.891	3.7112	dKO iPSC clone#3 +KD6 +2i +JQ1 48h														1.5882		0.667397					137.891	121.243	5.59562	1.31522		dKO iPSC clone#3 +KD6 +2i +JQ1 48h
	107.066	4.29532	dKO iPSC clone#5 +KD6 +2i +JQ1 48h														1.23317		0.30237					107.066	99.7374	5.66446	0.894677		dKO iPSC clone#5 +KD6 +2i +JQ1 48h
	Klf4 /Actin	Std Dev							Klf4 /Actin	Std Dev						Klf4 /Actin	Normalized to S/L Mean (AC33) per clone		Log2 FC per clone
	56.7586	0.439795	dKO iPSC clone#2 +EMPTY +S/L						54.3556	3.12571	dKO iPSC 3clones +EMPTY +S/L						1.04421		0.0624099
	55.4864	0.796948	dKO iPSC clone#3 +EMPTY +S/L						9.16756	1.48143	dKO iPSC 3clones +EMPTY +S/L +JQ1 48h						1.0208		0.0297041
	50.8219	0.975721	dKO iPSC clone#5 +EMPTY +S/L						118.686	11.7514	dKO iPSC 3clones +EMPTY +2i						0.934989		-0.0969792
	8.23117	0.380877	dKO iPSC clone#2 +EMPTY +S/L +JQ1 48h						97.1052	7.20518	dKO iPSC 3clones +EMPTY +2i +JQ1 48h						0.151432		-2.72326
	8.39599	0.192171	dKO iPSC clone#3 +EMPTY +S/L +JQ1 48h						142.683	15.7771	dKO iPSC 3clones +KD6 +S/L						0.154464		-2.69466
	10.8755	0.19506	dKO iPSC clone#5 +EMPTY +S/L +JQ1 48h						88.101	13.2794	dKO iPSC 3clones +KD6 +S/L +JQ1 48h						0.200081		-2.32135
	108.678	2.03482	dKO iPSC clone#2 +EMPTY +2i						150.528	27.9708	dKO iPSC 3clones +KD6 +2i						1.99939		0.999561
	115.753	3.0191	dKO iPSC clone#3 +EMPTY +2i						104.638	14.7772	dKO iPSC 3clones +KD6 +2i +JQ1 48h						2.12955		1.09055
	131.626	3.77009	dKO iPSC clone#5 +EMPTY +2i														2.42156		1.27594
	104.278	2.68871	dKO iPSC clone#2 +EMPTY +2i +JQ1 48h														1.91844		0.939935
	97.1693	2.11039	dKO iPSC clone#3 +EMPTY +2i +JQ1 48h														1.78766		0.838071
	89.8682	1.7123	dKO iPSC clone#5 +EMPTY +2i +JQ1 48h						Normalized to S/L								1.65334		0.725381
	131.382	3.74948	dKO iPSC clone#2 +KD6 +S/L						1	0.0575049	dKO iPSC 3clones +EMPTY +S/L						2.41708		1.27326
	160.708	3.37251	dKO iPSC clone#3 +KD6 +S/L						0.168659	0.0272544	dKO iPSC 3clones +EMPTY +S/L +JQ1 48h						2.95661		1.56394
	135.96	4.00171	dKO iPSC clone#5 +KD6 +S/L						2.1835	0.216194	dKO iPSC 3clones +EMPTY +2i						2.5013		1.32268
	90.6426	0.830357	dKO iPSC clone#2 +KD6 +S/L +JQ1 48h						1.78648	0.132556	dKO iPSC 3clones +EMPTY +2i +JQ1 48h						1.66758		0.737759
	73.7345	4.46103	dKO iPSC clone#3 +KD6 +S/L +JQ1 48h						2.625	0.290258	dKO iPSC 3clones +KD6 +S/L						1.35652		0.43991
	99.926	2.21685	dKO iPSC clone#5 +KD6 +S/L +JQ1 48h						1.62083	0.244307	dKO iPSC 3clones +KD6 +S/L +JQ1 48h						1.83837		0.878431
	160.424	8.54357	dKO iPSC clone#2 +KD6 +2i						2.76933	0.514589	dKO iPSC 3clones +KD6 +2i						2.95138		1.56139
	118.955	2.99316	dKO iPSC clone#3 +KD6 +2i						1.92506	0.271861	dKO iPSC 3clones +KD6 +2i +JQ1 48h						2.18846		1.12991
	172.206	2.80524	dKO iPSC clone#5 +KD6 +2i														3.16814		1.66364
	92.9336	1.60242	dKO iPSC clone#2 +KD6 +2i +JQ1 48h														1.70973		0.773771
	121.243	3.13159	dKO iPSC clone#3 +KD6 +2i +JQ1 48h														2.23055		1.1574
	99.7374	1.55169	dKO iPSC clone#5 +KD6 +2i +JQ1 48h														1.8349		0.875705
	Tbx3 5'eRNA/Actin	Std Dev							Tbx3 5'eRNA /Actin	Std Dev						Tbx3 5'eRNA /Actin	Normalized to S/L Mean (AC61) per clone		Log2 FC per clone
	2.44857	0.0362216	dKO iPSC clone#2 +EMPTY +S/L						2.78918	0.538722	dKO iPSC 3clones +EMPTY +S/L						0.877882		-0.1879
	2.5087	0.0943924	dKO iPSC clone#3 +EMPTY +S/L						0.640375	0.0688568	dKO iPSC 3clones +EMPTY +S/L +JQ1 48h						0.899438		-0.152904
	3.41028	0.0930281	dKO iPSC clone#5 +EMPTY +S/L						4.97761	0.589021	dKO iPSC 3clones +EMPTY +2i						1.22268		0.290046
	0.652783	0.0105497	dKO iPSC clone#2 +EMPTY +S/L +JQ1 48h						4.05559	0.447395	dKO iPSC 3clones +EMPTY +2i +JQ1 48h						0.234041		-2.09517
	0.566158	0.0120604	dKO iPSC clone#3 +EMPTY +S/L +JQ1 48h						5.46531	0.142772	dKO iPSC 3clones +KD6 +S/L						0.202984		-2.30056
	0.702185	0.0256999	dKO iPSC clone#5 +EMPTY +S/L +JQ1 48h						2.84708	0.83122	dKO iPSC 3clones +KD6 +S/L +JQ1 48h						0.251753		-1.98992
	5.31031	0.0283884	dKO iPSC clone#2 +EMPTY +2i						7.71946	0.523402	dKO iPSC 3clones +KD6 +2i						1.90389		0.928953
	5.32501	0.126899	dKO iPSC clone#3 +EMPTY +2i						6.05136	0.730549	dKO iPSC 3clones +KD6 +2i +JQ1 48h						1.90916		0.932941
	4.29752	0.0061241	dKO iPSC clone#5 +EMPTY +2i														1.54078		0.623663
	3.53931	0.0985134	dKO iPSC clone#2 +EMPTY +2i +JQ1 48h														1.26894		0.343627
	4.29782	0.0327272	dKO iPSC clone#3 +EMPTY +2i +JQ1 48h														1.54089		0.623763
	4.32964	0.0660983	dKO iPSC clone#5 +EMPTY +2i +JQ1 48h						Normalized to S/L								1.5523		0.634406
	5.46731	0.0799286	dKO iPSC clone#2 +KD6 +S/L						1	0.193147	dKO iPSC 3clones +EMPTY +S/L						1.96018		0.970989
	5.32155	0.117454	dKO iPSC clone#3 +KD6 +S/L						0.229592	0.0246871	dKO iPSC 3clones +EMPTY +S/L +JQ1 48h						1.90792		0.932003
	5.60707	0.0985523	dKO iPSC clone#5 +KD6 +S/L						1.78461	0.21118	dKO iPSC 3clones +EMPTY +2i						2.01029		1.0074
	3.66631	0.0783725	dKO iPSC clone#2 +KD6 +S/L +JQ1 48h						1.45404	0.160403	dKO iPSC 3clones +EMPTY +2i +JQ1 48h						1.31447		0.394485
	2.00436	0.0651005	dKO iPSC clone#3 +KD6 +S/L +JQ1 48h						1.95947	0.0511876	dKO iPSC 3clones +KD6 +S/L						0.718621		-0.476698
	2.87056	0.057517	dKO iPSC clone#5 +KD6 +S/L +JQ1 48h						1.02076	0.298015	dKO iPSC 3clones +KD6 +S/L +JQ1 48h						1.02918		0.0414896
	7.29525	0.201105	dKO iPSC clone#2 +KD6 +2i						2.76764	0.187654	dKO iPSC 3clones +KD6 +2i						2.61555		1.38711
	7.55876	0.0857351	dKO iPSC clone#3 +KD6 +2i						2.16958	0.261922	dKO iPSC 3clones +KD6 +2i +JQ1 48h						2.71003		1.43831
	8.30437	0.183483	dKO iPSC clone#5 +KD6 +2i														2.97735		1.57403
	6.89399	0.153668	dKO iPSC clone#2 +KD6 +2i +JQ1 48h														2.47169		1.3055
	5.59562	0.0689268	dKO iPSC clone#3 +KD6 +2i +JQ1 48h														2.00619		1.00446
	5.66446	0.164801	dKO iPSC clone#5 +KD6 +2i +JQ1 48h														2.03087		1.0221
	Prdm14 5'eRNA/Actin	Std Dev							Prdm14 5'eRNA /Actin	Std Dev						Prdm14 5'eRNA /Actin	Normalized to S/L Mean (AC61) per clone		Log2 FC per clone
	0.575522	0.00933902	dKO iPSC clone#2 +EMPTY +S/L						0.600459	0.0317502	dKO iPSC 3clones +EMPTY +S/L						0.95847		-0.0611949
	0.589653	0.0235106	dKO iPSC clone#3 +EMPTY +S/L						0.217932	0.101827	dKO iPSC 3clones +EMPTY +S/L +JQ1 48h						0.982005		-0.0261984
	0.636201	0.00121331	dKO iPSC clone#5 +EMPTY +S/L						1.10352	0.27493	dKO iPSC 3clones +EMPTY +2i						1.05953		0.0834183
	0.153432	0.00160572	dKO iPSC clone#2 +EMPTY +S/L +JQ1 48h						0.883775	0.116917	dKO iPSC 3clones +EMPTY +2i +JQ1 48h						0.255525		-1.96846
	0.33532	0.00637331	dKO iPSC clone#3 +EMPTY +S/L +JQ1 48h						1.39295	0.159287	dKO iPSC 3clones +KD6 +S/L						0.55844		-0.840526
	0.165044	0.00541021	dKO iPSC clone#5 +EMPTY +S/L +JQ1 48h						0.609928	0.120307	dKO iPSC 3clones +KD6 +S/L +JQ1 48h						0.274863		-1.86321
	0.786288	0.0325963	dKO iPSC clone#2 +EMPTY +2i						1.61557	0.0874747	dKO iPSC 3clones +KD6 +2i						1.30948		0.388992
	1.25161	0.0239925	dKO iPSC clone#3 +EMPTY +2i						1.16533	0.234845	dKO iPSC 3clones +KD6 +2i +JQ1 48h						2.08442		1.05965
	1.27265	0.0239539	dKO iPSC clone#5 +EMPTY +2i														2.11947		1.0837
	0.831893	0.0220854	dKO iPSC clone#2 +EMPTY +2i +JQ1 48h														1.38543		0.470332
	0.801777	0.0131634	dKO iPSC clone#3 +EMPTY +2i +JQ1 48h														1.33527		0.417135
	1.01766	0.0194698	dKO iPSC clone#5 +EMPTY +2i +JQ1 48h						Normalized to S/L								1.6948		0.761111
	1.28506	0.0234085	dKO iPSC clone#2 +KD6 +S/L						1	0.0528766	dKO iPSC 3clones +EMPTY +S/L						2.14012		1.09769
	1.5759	0.0191284	dKO iPSC clone#3 +KD6 +S/L						0.362943	0.169581	dKO iPSC 3clones +EMPTY +S/L +JQ1 48h						2.6245		1.39204
	1.31791	0.0210938	dKO iPSC clone#5 +KD6 +S/L						1.83779	0.457866	dKO iPSC 3clones +EMPTY +2i						2.19483		1.13411
	0.683965	0.00615797	dKO iPSC clone#2 +KD6 +S/L +JQ1 48h						1.47183	0.194714	dKO iPSC 3clones +EMPTY +2i +JQ1 48h						1.13907		0.187857
	0.471113	0.0164157	dKO iPSC clone#3 +KD6 +S/L +JQ1 48h						2.31982	0.265275	dKO iPSC 3clones +KD6 +S/L						0.784588		-0.349992
	0.674707	0.00942682	dKO iPSC clone#5 +KD6 +S/L +JQ1 48h						1.01577	0.200358	dKO iPSC 3clones +KD6 +S/L +JQ1 48h						1.12365		0.168195
	1.7147	0.042151	dKO iPSC clone#2 +KD6 +2i						2.69056	0.14568	dKO iPSC 3clones +KD6 +2i						2.85565		1.51382
	1.5828	0.022762	dKO iPSC clone#3 +KD6 +2i						1.94074	0.391109	dKO iPSC 3clones +KD6 +2i +JQ1 48h						2.63599		1.39835
	1.54921	0.0143366	dKO iPSC clone#5 +KD6 +2i														2.58005		1.3674
	1.2861	0.0245747	dKO iPSC clone#2 +KD6 +2i +JQ1 48h														2.14187		1.09887
	1.31522	0.0194828	dKO iPSC clone#3 +KD6 +2i +JQ1 48h														2.19035		1.13116
	0.894677	0.00906195	dKO iPSC clone#5 +KD6 +2i +JQ1 48h														1.48999		0.575302
