# Supplementary material for: Global hyperactivation of enhancers stabilizes human and mouse naive pluripotency through inhibition of CDK8/19 Mediator kinases
Source: Springer Nature journal article supplement (doi:10.1038/s41556-020-0573-1), 2020-09-28
Supplement: MOESM19 [file 41556_2020_573_MOESM19_ESM.xlsx]

## Sheet: Ex Data Fig 3A
Fig S3A	AP/colony in HERVH clonal assay
		Low Alk. Ph			Med Alk. Ph			High Alk. Ph
		Mean %	n		Mean %	n		Mean %	n
	Primed	12.9252	10		69.3878	10		17.6871	10
	Cdk8i	3.44828	10		9.48276	10		87.069	10
	Primed	25.6757	10		70.9459	10		3.37838	10
	Cdk8i	4.69484	10		12.2066	10		83.0986	10
	Primed	28.2051	10		61.5385	10		10.2564	10
	Cdk8i	5.12821	10		5.64103	10		89.2308	10
	Primed	18.0645	10		79.3548	10		2.58065	10
	Cdk8i	16.5049	10		21.3592	10		62.1359	10

## Sheet: Ex Data Fig 3C
Fig S3C	Human multi-cell line pluripotency marker qPCR
	GAPDH
	Sample	rep1	rep2	rep3		Mean	Std Dev
	H1 Primed p+54 D+14 Day81	26.7329	27.2825	27.2757		27.097	0.315327
	H1 8i p+52 D+12 Day81	29.001	28.9271	28.9898		28.9726	0.0398135
	D2#2 Primed p+29 D+12 Day72	27.1753	27.2352	27.3366		27.249	0.0815397
	D2#2 8i p+29 D+12 Day72	28.4682	29.1135	Undetermined		28.7909	0.456249
	D2#4 Primed p+33 D+12 Day64	28.0355	28.2584	28.1324		28.1421	0.111794
	D2#4 8i p+33 D+12 Day64	27.3139	28.3556	28.132		27.9338	0.548414
	CB5-2 Primed p+36 D+16 Day86	27.5481	27.1885	27.3088		27.3484	0.183075
	CB5-1 8i p+32 D+13 Day88	29.1876	29.1097	27.8893		28.7289	0.728136
	CB5-2 Primed p+33 D+13 Day78	27.1918	27.2421	27.4655		27.2998	0.145723
	CB5-2 8i p+32 D+12 Day78	35.7463	32.0175	35.8342		34.5326	2.17864
	WIBR3 Primed p+32 D+11 Day50	29.5799	28.9847	29.6766		29.4138	0.374703
	WIBR3 8i p+32 D+11 Day50	29.3358	30.0422	29.7839		29.7206	0.35744
	NANOG											NANOG
								vs GAPDH				Replicate ratio vs Mean				(Replicate ratio vs Mean) vs GAPDH
	Sample	rep1	rep2	rep3		Mean	Std Dev	Mean	Std Dev			rep1	rep2	rep3		rep1	rep2	rep3
	H1 Primed	19.5908	19.6066	19.5145		19.5707	0.0492675	184359	464.109			1.00103	1.00184	0.997131		184549	184698	183830
	H1 CDK8/19i	20.2445	20.3517	20.1997		20.2653	0.0781039	417996	1610.98			0.998972	1.00426	0.996764		417566	419778	416643
	D2#2 Primed	19.8636	19.922	19.9245		19.9034	0.0344716	162656	281.713			0.998001	1.00094	1.00106		162331	162809	162829
	D2#2 CDK8/19i	21.7045	22.1494	21.7809		21.8783	0.237926	120475	1310.17			0.992058	1.01239	0.995548		119518	121969	119939
	D2#4 Primed	19.7576	20.7901	19.7371		20.0949	0.602144	264507	7925.95			0.983211	1.0346	0.982194		260066	273658	259798
	D2#4 CDK8/19i	18.85	19.3023	19.2521		19.1348	0.247935	445422	5771.47			0.985115	1.00875	1.00613		438792	449321	448154
	CB5 Primed -Set1	20.2768	20.3442	20.0127		20.2113	0.175214	140770	1220.35			1.00324	1.00658	0.990177		141226	141696	139387
	CB5 CDK8/19i -Set1	19.671	20.1859	19.7331		19.8634	0.281058	466433	6599.84			0.990317	1.01624	0.993444		461917	474007	463375
	CB5 Primed -Set2	20.3003	19.6111	20.6446		20.1854	0.526259	138565	3612.56			1.0057	0.971552	1.02275		139354	134623	141717
	CB5 CDK8/19i -Set2	24.9319	25.3819	25.1558		25.1565	0.22504	664493	5944.29			0.991069	1.00896	0.99997		658559	670447	664473
	WIBR3 Primed	20.8911	20.2991	20.679		20.6231	0.299928	442847	6440.48			1.013	0.984292	1.00271		448603	435891	444048
	WIBR3 CDK8/19i	20.5166	20.3373	20.2409		20.3649	0.139894	655153	4500.48			1.00745	0.998644	0.99391		660032	654265	651163
	POU5F1/OCT4											POU5F1/OCT4
								vs GAPDH				Replicate ratio vs Mean				(Replicate ratio vs Mean) vs GAPDH
	Sample	rep1	rep2	rep3		Mean	Std Dev	Mean	Std Dev			rep1	rep2	rep3		rep1	rep2	rep3
	H1 Primed	19.1478	18.916	19.0562		19.04	0.116732	266324	1632.8			1.00566	0.993489	1.00085		267832	264590	266550
	H1 CDK8/19i	19.3998	19.4777	19.5151		19.4642	0.0588378	728326	2201.64			0.99669	1.0007	1.00261		725915	728833	730230
	D2#2 Primed	20.3246	18.9667	19.2785		19.5233	0.711299	211683	7712.33			1.04105	0.971489	0.987464		220372	205648	209030
	D2#2 CDK8/19i	20.5452	20.2842	20.3568		20.3954	0.134719	336728	2224.21			1.00735	0.994549	0.998105		339201	334892	336090
	D2#4 Primed	19.7529	19.8143	19.7594		19.7756	0.0337393	330054	563.108			0.998857	1.00196	0.999182		329676	330701	329784
	D2#4 CDK8/19i	19.2703	19.37	19.1133		19.2512	0.12942	410900	2762.35			1.00099	1.00617	0.992837		411307	413436	407957
	CB5 Primed -Set1	18.8963	18.9576	18.9363		18.9301	0.0311181	342125	562.402			0.998217	1.00146	1.00033		341515	342623	342237
	CB5 CDK8/19i -Set1	19.2279	19.1276	19.1901		19.1819	0.0506468	748047	1975.1			1.0024	0.997171	1.00043		749842	745931	748368
	CB5 Primed -Set2	18.8822	18.7302	18.883		18.8318	0.0880106	354089	1654.84			1.00268	0.994604	1.00272		355037	352178	355052
	CB5 CDK8/19i -Set2	24.6192	23.8546	23.7881		24.0873	0.461848	1.39429e+06	26734			1.02208	0.990339	0.987578		1.42508e+06	1.38082e+06	1.37697e+06
	WIBR3 Primed	19.3498	19.0812	19.0605		19.1638	0.161378	1.21767e+06	10254			1.0097	0.99569	0.994607		1.22949e+06	1.21243e+06	1.21111e+06
	WIBR3 CDK8/19i	19.1675	19.2296	19.2381		19.2117	0.0385312	1.4571e+06	2922.37			0.997698	1.00093	1.00137		1.45375e+06	1.45845e+06	1.4591e+06
	TFCP2L1											POU5F1/OCT4
								vs GAPDH				Replicate ratio vs Mean				(Replicate ratio vs Mean) vs GAPDH
	Sample	rep1	rep2	rep3		Mean	Std Dev	Mean	Std Dev			rep1	rep2	rep3		rep1	rep2	rep3
	H1 Primed	29.7577	29.9495	29.9168		29.8747	0.102592	145.83	0.500789			0.996085	1.00251	1.00141		145.259	146.195	146.035
	H1 CDK8/19i	30.9935	31.0038	30.6847		30.894	0.181312	264.001	1.54938			1.00322	1.00355	0.993226		264.851	264.939	262.212
	D2#2 Primed	31.6444	31.1687	31.0689		31.294	0.307484	60.5824	0.595262			1.0112	0.995996	0.992808		61.2607	60.3399	60.1467
	D2#2 CDK8/19i	33.7276	33.0413	33.1763		33.315	0.363611	43.4594	0.474329			1.01238	0.991782	0.995834		43.9976	43.1022	43.2783
	D2#4 Primed	29.7718	29.8774	29.7733		29.8075	0.0605124	315.26	0.640011			0.998802	1.00234	0.998854		314.882	315.998	314.898
	D2#4 CDK8/19i	30.0591	29.5451	29.5051		29.7031	0.308949	293.361	3.05132			1.01199	0.994682	0.993333		296.877	291.801	291.405
	CB5 Primed -Set1	30.3867	30.4899	30.5651		30.4806	0.0895677	114.059	0.335165			0.99692	1.00031	1.00277		113.708	114.094	114.376
	CB5 CDK8/19i -Set1	30.7528	30.4598	30.4895		30.5674	0.161295	279.616	1.47545			1.00607	0.99648	0.997453		281.313	278.632	278.904
	CB5 Primed -Set2	31.1773	31.3045	31.0556		31.1791	0.124435	67.9521	0.271195			0.999941	1.00402	0.996039		67.948	68.2253	67.6829
	CB5 CDK8/19i -Set2	36.8313	35.1613	34.3517		35.4481	1.26447	530.17	18.9116			1.03902	0.991909	0.969069		550.858	525.88	513.771
	WIBR3 Primed	29.8513	29.7178	29.5454		29.7048	0.153328	817.289	4.21862			1.00493	1.00044	0.994634		821.317	817.646	812.903
	WIBR3 CDK8/19i	29.9929	30.0743	29.8356		29.9676	0.121324	842.661	3.41151			1.00084	1.00356	0.995596		843.373	845.661	838.95
	PRDM14											PRDM14
								vs GAPDH				Replicate ratio vs Mean				(Replicate ratio vs Mean) vs GAPDH
	Sample	rep1	rep2	rep3		Mean	Std Dev	Mean	Std Dev			rep1	rep2	rep3		rep1	rep2	rep3
	H1 Primed	25.7042	25.7582	25.7007		25.721	0.0322562	2595.46	3.25491			0.999344	1.00145	0.99921		2593.76	2599.22	2593.41
	H1 CDK8/19i	24.2135	24.3848	24.434		24.3441	0.115773	24736.1	117.638			0.994634	1.00167	1.00369		24603.4	24777.5	24827.5
	D2#2 Primed	27.2951	25.6041	25.512		26.137	1.00395	2161.46	83.0239			1.04431	0.979608	0.976086		2257.23	2117.39	2109.77
	D2#2 CDK8/19i	26.0059	25.917	25.9515		25.9582	0.0447996	7124.1	12.2951			1.00184	0.998416	0.999744		7137.2	7112.82	7122.28
	D2#4 Primed	26.3457	25.977	26.0407		26.1211	0.197065	4058.62	30.6193			1.0086	0.994482	0.996922		4093.51	4036.22	4046.12
	D2#4 CDK8/19i	23.9722	24.2422	24.0799		24.0981	0.135915	14278.3	80.5305			0.994775	1.00598	0.999246		14203.7	14363.6	14267.5
	CB5 Primed -Set1	26.0276	25.8327	25.8412		25.9005	0.110159	2728.18	11.6034			1.00491	0.997383	0.997709		2741.57	2721.04	2721.93
	CB5 CDK8/19i -Set1	25.7079	25.5772	25.5409		25.6086	0.087816	8695.34	29.8177			1.00387	0.998772	0.997354		8729.03	8684.66	8672.33
	CB5 Primed -Set2	25.6953	25.9199	25.6781		25.7644	0.134885	2898.59	15.175			0.997316	1.00603	0.996651		2890.81	2916.07	2888.88
	CB5 CDK8/19i -Set2	29.4198	29.2181	29.2704		29.3027	0.104679	37528.1	134.063			1.00399	0.99711	0.998896		37678	37419.6	37486.6
	WIBR3 Primed	25.6282	25.6034	Undetermined		25.6158	0.0175385	13909.1	9.52322			1.00048	0.999516	#VALUE!		13915.9	13902.4	#VALUE!
	WIBR3 CDK8/19i	23.9729	23.8634	23.9276		23.9213	0.0550265	55688.3	128.101			1.00216	0.99758	1.00026		55808.5	55553.5	55702.9
	KLF17											KLF17
								vs GAPDH				Replicate ratio vs Mean				(Replicate ratio vs Mean) vs GAPDH
	Sample	rep1	rep2	rep3		Mean	Std Dev	Mean	Std Dev			rep1	rep2	rep3		rep1	rep2	rep3
	H1 Primed	33.2627	Undetermined	Undetermined		33.2627	#DIV/0!	13.9297	#DIV/0!			1	#VALUE!	#VALUE!		13.9297	#VALUE!	#VALUE!
	H1 CDK8/19i	33.6321	33.6311	Undetermined		33.6316	0.000690534	39.5835	0.000812741			1.00001	0.999985	#VALUE!		39.5841	39.5829	#VALUE!
	D2#2 Primed	Undetermined	Undetermined	34.4308		34.4308	#DIV/0!	6.88789	#DIV/0!			#VALUE!	#VALUE!	1		#VALUE!	#VALUE!	6.88789
	D2#2 CDK8/19i	Undetermined	Undetermined	Undetermined		#DIV/0!	#DIV/0!	#DIV/0!	#DIV/0!			#VALUE!	#VALUE!	#VALUE!		#DIV/0!	#VALUE!	#VALUE!
	D2#4 Primed	36.426	Undetermined	Undetermined		36.426	#DIV/0!	3.20849	#DIV/0!			1	#VALUE!	#VALUE!		3.20849	#VALUE!	#VALUE!
	D2#4 CDK8/19i	Undetermined	Undetermined	38.6826		38.6826	#DIV/0!	0.581167	#DIV/0!			#VALUE!	#VALUE!	1		#VALUE!	#VALUE!	0.581167
	CB5 Primed -Set1	Undetermined	34.5304	36.3404		35.4354	1.27992	3.67775	0.13284			#VALUE!	0.974459	1.02554		#VALUE!	3.58382	3.77168
	CB5 CDK8/19i -Set1	33.9675	Undetermined	36.8694		35.4185	2.05199	9.68805	0.561284			0.959033	#VALUE!	1.04097		9.29116	#VALUE!	10.0849
	CB5 Primed -Set2	Undetermined	33.9939	Undetermined		33.9939	#DIV/0!	9.65758	#DIV/0!			#VALUE!	1	#VALUE!		#VALUE!	9.65758	#VALUE!
	CB5 CDK8/19i -Set2	Undetermined	Undetermined	Undetermined		#DIV/0!	#DIV/0!	#DIV/0!	#DIV/0!			#VALUE!	#VALUE!	#VALUE!		#DIV/0!	#VALUE!	#VALUE!
	WIBR3 Primed	33.7816	Undetermined	Undetermined		33.7816	#DIV/0!	48.435	#DIV/0!			1	#VALUE!	#VALUE!		48.435	#VALUE!	#VALUE!
	WIBR3 CDK8/19i	Undetermined	32.571	Undetermined		32.571	#DIV/0!	138.656	#DIV/0!			#VALUE!	1	#VALUE!		#VALUE!	138.656	#VALUE!
	KLF4											KLF4
								vs GAPDH				Replicate ratio vs Mean				(Replicate ratio vs Mean) vs GAPDH
	Sample	rep1	rep2	rep3		Mean	Std Dev	Mean	Std Dev			rep1	rep2	rep3		rep1	rep2	rep3
	H1 Primed	30.3436	30.4678	30.3517		30.3877	0.0694669	102.192	0.233614			0.99855	1.00264	0.998815		102.044	102.462	102.071
	H1 CDK8/19i	27.9267	28.1073	27.6403		27.8914	0.235511	2115.81	17.8655			1.00127	1.00774	0.990995		2118.49	2132.18	2096.76
	D2#2 Primed	29.6368	29.7614	29.9913		29.7965	0.179865	171.056	1.03257			0.99464	0.998821	1.00654		170.139	170.855	172.175
	D2#2 CDK8/19i	33.6197	32.3804	32.8288		32.943	0.627472	56.245	1.07131			1.02054	0.982923	0.996535		57.4004	55.2845	56.0501
	D2#4 Primed	30.4144	30.3373	29.6491		30.1336	0.421342	251.484	3.51637			1.00932	1.00676	0.983922		253.827	253.184	247.44
	D2#4 CDK8/19i	27.6693	27.8959	27.458		27.6744	0.218962	1196.99	9.47067			0.999815	1.008	0.992182		1196.77	1206.57	1187.63
	CB5 Primed -Set1	29.734	30.1493	29.7288		29.8707	0.241324	174.071	1.40631			0.995424	1.00933	0.995248		173.274	175.695	173.244
	CB5 CDK8/19i -Set1	29.6865	29.4872	29.8672		29.6803	0.190074	517.125	3.31168			1.00021	0.993495	1.0063		517.232	513.761	520.382
	CB5 Primed -Set2	29.7738	30.7186	29.7644		30.0856	0.548221	145.006	2.64231			0.989635	1.02104	0.989325		143.503	148.057	143.458
	CB5 CDK8/19i -Set2	33.4267	33.8596	36.4905		34.5923	1.65811	959.52	45.9926			0.966304	0.978821	1.05487		927.189	939.199	1012.17
	WIBR3 Primed	30.0166	29.7895	29.6934		29.8332	0.165948	747.73	4.15928			1.00615	0.998536	0.995316		752.327	746.636	744.228
	WIBR3 CDK8/19i	27.7878	27.8913	27.6919		27.7903	0.0997446	3811.34	13.6796			0.999908	1.00363	0.996458		3810.99	3825.19	3797.84

## Sheet: Ex Data Fig 3E
Fig S3E	RRHO: RNAseq: 2i vs CDK8/19i
		RNAseq	Proteome	RNAseq	RNAseq	RNAseq	RNAseq
		Gene_2i	Gene_CDK8/19i	Rank_2i_vs_Ctrl	Rank_8i_vs_Ctrl	Log2_FC 2i vs Ctrl	Log2_FC 2i vs Ctrl
		GM4302	GM4302	975	1	-1.3819	-6.2651
		GM4312	GM4312	738	2	-1.6543	-5.5709
		ZSCAN4D	ZSCAN4D	299	3	-2.5664	-5.4372
		ALB	ALB	6748	4	-0.0783	-5.362
		ZSCAN4A	ZSCAN4A	289	5	-2.5932	-5.2957
		ZSCAN4F	ZSCAN4F	297	6	-2.5703	-5.2366
		GM4301	GM4301	643	7	-1.7769	-5.1639
		GM4340	GM4340	456	8	-2.1148	-5.0606
		ZSCAN4C	ZSCAN4C	318	9	-2.502	-4.9889
		ZSCAN4E	ZSCAN4E	352	10	-2.3827	-4.9365
		ZSCAN4B	ZSCAN4B	357	11	-2.3603	-4.7624
		GM10394	GM10394	370	12	-2.3342	-4.7594
		MAML2	MAML2	2895	13	-0.5203	-4.6789
		GM13040	GM13040	1013	14	-1.3359	-4.4978
		DUB3	DUB3	568	15	-1.8783	-4.4041
		TCSTV3	TCSTV3	423	16	-2.1872	-4.4001
		PDCL2	PDCL2	12511	17	1.7737	-4.3877
		AF067061	AF067061	427	18	-2.1804	-4.2937
		GM13043	GM13043	17	19	-5.2458	-4.2334
		MYB	MYB	632	20	-1.7975	-4.1809
		NRSN1	NRSN1	10	21	-5.5856	-4.1195
		BC080695	BC080695	553	22	-1.9076	-3.9851
		GM12794	GM12794	389	23	-2.2799	-3.9391
		B020031M17RIK	B020031M17RIK	650	24	-1.7699	-3.9239
		GM4971	GM4971	500	25	-2.0253	-3.9055
		RHOX9	RHOX9	40	26	-4.4856	-3.8933
		HEBP2	HEBP2	1316	27	-1.103	-3.7774
		RHOX6	RHOX6	27	28	-4.9235	-3.7521
		SERPINF1	SERPINF1	617	29	-1.8178	-3.7333
		CPNE9	CPNE9	1025	30	-1.327	-3.7055
		GM13109	GM13109	795	31	-1.5848	-3.704
		LFNG	LFNG	198	32	-2.9387	-3.6684
		GM4303	GM4303	706	33	-1.6901	-3.6628
		2610528J11RIK	2610528J11RIK	22	34	-5.0338	-3.6545
		TMEM92	TMEM92	1638	35	-0.8964	-3.6115
		ATP10A	ATP10A	73	36	-3.908	-3.5433
		GM10391	GM10391	394	37	-2.2558	-3.5348
		DNAJC5G	DNAJC5G	12133	38	1.0599	-3.4947
		FREM2	FREM2	79	39	-3.8559	-3.4805
		TDRD12	TDRD12	5200	40	-0.2197	-3.4656
		TCSTV1	TCSTV1	495	41	-2.036	-3.4297
		ZSCAN5B	ZSCAN5B	10031	42	0.2854	-3.4193
		TRH	TRH	141	43	-3.371	-3.4006
		MOBP	MOBP	1926	44	-0.773	-3.3841
		GPR114	GPR114	1831	45	-0.8093	-3.3828
		CLDN3	CLDN3	10419	46	0.3537	-3.3742
		DPPA3	DPPA3	667	47	-1.75	-3.2914
		AQP6	AQP6	111	48	-3.587	-3.2569
		2410004I01RIK	2410004I01RIK	532	49	-1.9535	-3.2366
		EBI3	EBI3	175	50	-3.1094	-3.2365
		NEXN	NEXN	70	51	-3.9728	-3.2359
		GM1082	GM1082	1575	52	-0.9342	-3.2145
		KLHL13	KLHL13	5128	53	-0.2275	-3.2111
		GSTM3	GSTM3	10567	54	0.3795	-3.186
		PAX6	PAX6	15	55	-5.343	-3.1497
		ACSL5	ACSL5	597	56	-1.8449	-3.1335
		ARHGDIB	ARHGDIB	1726	57	-0.8522	-3.104
		PRTG	PRTG	10514	58	0.3685	-3.0357
		FSTL3	FSTL3	629	59	-1.8015	-3.0287
		LEFTY1	LEFTY1	894	60	-1.4788	-3.0184
		KCTD12B	KCTD12B	764	61	-1.622	-3.0082
		PDLIM3	PDLIM3	57	62	-4.161	-2.9948
		VRTN	VRTN	32	63	-4.7426	-2.9904
		CAR12	CAR12	257	64	-2.7244	-2.978
		JAKMIP2	JAKMIP2	14	65	-5.4021	-2.9379
		STC1	STC1	552	66	-1.9088	-2.9372
		IL12RB1	IL12RB1	909	67	-1.4652	-2.9286
		PRSS57	PRSS57	493	68	-2.0386	-2.9265
		3830417A13RIK	3830417A13RIK	857	69	-1.5207	-2.9261
		TTPA	TTPA	5598	70	-0.1816	-2.92
		TMEM54	TMEM54	3	71	-6.4952	-2.9136
		SNCB	SNCB	123	72	-3.497	-2.912
		AP3B2	AP3B2	1068	73	-1.287	-2.8974
		ZIM3	ZIM3	3169	74	-0.467	-2.8838
		MGST1	MGST1	181	75	-3.0618	-2.8688
		REPS2	REPS2	261	76	-2.7093	-2.8611
		SETBP1	SETBP1	757	77	-1.6308	-2.851
		GSDMD	GSDMD	11619	78	0.6881	-2.8478
		CRMP1	CRMP1	13	79	-5.4089	-2.8396
		ESRP1	ESRP1	34	80	-4.6295	-2.8285
		RASGRP1	RASGRP1	10082	81	0.293	-2.8003
		ELMO1	ELMO1	166	82	-3.2035	-2.7959
		FNDC3C1	FNDC3C1	88	83	-3.8038	-2.7941
		RHOX1	RHOX1	10348	84	0.3393	-2.7685
		PLAU	PLAU	547	85	-1.914	-2.7451
		LPAR4	LPAR4	1223	86	-1.1557	-2.7204
		GM5662	GM5662	786	87	-1.5958	-2.7084
		HS6ST2	HS6ST2	12	88	-5.503	-2.7082
		CDH3	CDH3	1734	89	-0.8475	-2.6968
		GSTM2	GSTM2	11709	90	0.7356	-2.6966
		TEPP	TEPP	1868	91	-0.7944	-2.6792
		SIGLEC5	SIGLEC5	1569	92	-0.9396	-2.6749
		MLKL	MLKL	45	93	-4.4106	-2.6727
		CD109	CD109	1037	94	-1.3121	-2.6714
		TBC1D9	TBC1D9	467	95	-2.0851	-2.6531
		MIR1949	MIR1949	2014	96	-0.7388	-2.6312
		SLC25A43	SLC25A43	2312	97	-0.6484	-2.6237
		SPATA21	SPATA21	1329	98	-1.0932	-2.6193
		CD79A	CD79A	371	99	-2.3299	-2.6162
		MT3	MT3	41	100	-4.474	-2.6152
		TMEM125	TMEM125	561	101	-1.8906	-2.6141
		CNKSR1	CNKSR1	441	102	-2.1455	-2.6095
		FGR	FGR	1008	103	-1.3448	-2.6053
		GM4975	GM4975	5308	104	-0.2091	-2.5985
		LOC639910	LOC639910	806	105	-1.5665	-2.5938
		ARHGAP33	ARHGAP33	346	106	-2.4047	-2.5857
		PYGO1	PYGO1	7363	107	-0.0211	-2.5601
		MFAP4	MFAP4	312	108	-2.5296	-2.5464
		GNA14	GNA14	24	109	-4.9916	-2.5343
		SLC27A2	SLC27A2	309	110	-2.5313	-2.526
		DDIT4	DDIT4	1280	111	-1.1203	-2.5238
		REM2	REM2	454	112	-2.1203	-2.4886
		FUT9	FUT9	6352	113	-0.1132	-2.4882
		1700067K01RIK	1700067K01RIK	6864	114	-0.0672	-2.4866
		5033404E19RIK	5033404E19RIK	1966	115	-0.7571	-2.4762
		GPX6	GPX6	827	116	-1.5506	-2.4751
		GLOD5	GLOD5	656	117	-1.7618	-2.4731
		RNF207	RNF207	6700	118	-0.0821	-2.461
		KCNK1	KCNK1	565	119	-1.8847	-2.4545
		IFITM1	IFITM1	2675	120	-0.5649	-2.4389
		HPN	HPN	688	121	-1.7157	-2.4341
		PLEKHH3	PLEKHH3	9407	122	0.202	-2.4322
		NHSL1	NHSL1	7375	123	-0.0203	-2.4287
		BNIP3	BNIP3	1631	124	-0.8992	-2.4284
		ASCL2	ASCL2	794	125	-1.5855	-2.4252
		TFAP2C	TFAP2C	1876	126	-0.7896	-2.4166
		GM11413	GM11413	2208	127	-0.6776	-2.4163
		PRTN3	PRTN3	329	128	-2.4492	-2.4074
		ENPP3	ENPP3	26	129	-4.966	-2.4022
		SELPLG	SELPLG	1134	130	-1.2292	-2.3969
		MIR3096	MIR3096	483	131	-2.0615	-2.395
		TRIM21	TRIM21	1232	132	-1.1487	-2.3836
		PRDM1	PRDM1	1318	133	-1.1009	-2.3759
		RAPSN	RAPSN	10896	134	0.4443	-2.3634
		NAPRT1	NAPRT1	64	135	-4.0636	-2.3525
		INADL	INADL	917	136	-1.4598	-2.3448
		DLL3	DLL3	536	137	-1.9387	-2.3446
		ZP3	ZP3	1220	138	-1.1583	-2.3384
		MMEL1	MMEL1	337	139	-2.4311	-2.3348
		FAM19A4	FAM19A4	205	140	-2.9268	-2.3327
		SYT5	SYT5	374	141	-2.3258	-2.3235
		AURKC	AURKC	12645	142	2.5523	-2.3196
		CDK3-PS	CDK3-PS	2181	143	-0.6846	-2.3129
		TICAM2	TICAM2	1386	144	-1.0478	-2.3081
		FAM171B	FAM171B	222	145	-2.853	-2.3016
		LCTL	LCTL	463	146	-2.0993	-2.2986
		LRRC15	LRRC15	7332	147	-0.0236	-2.2943
		NRP2	NRP2	1218	148	-1.1603	-2.293
		CAMKV	CAMKV	1405	149	-1.0321	-2.2829
		RIMS4	RIMS4	133	150	-3.4323	-2.2787
		4930500J02RIK	4930500J02RIK	9472	151	0.2098	-2.2712
		ELN	ELN	95	152	-3.7811	-2.2529
		FBXO15	FBXO15	6457	153	-0.1021	-2.2418
		MYH3	MYH3	432	154	-2.1618	-2.2281
		SLMO1	SLMO1	563	155	-1.8863	-2.2166
		IGTP	IGTP	406	156	-2.2161	-2.2136
		JSRP1	JSRP1	658	157	-1.757	-2.2008
		H2-T9	H2-T9	3851	158	-0.3628	-2.199
		UBASH3A	UBASH3A	1479	159	-0.9889	-2.1924
		CD276	CD276	421	160	-2.1889	-2.1822
		KRT7	KRT7	135	161	-3.4261	-2.1735
		KRTDAP	KRTDAP	268	162	-2.6726	-2.1678
		CTNNAL1	CTNNAL1	1846	163	-0.8027	-2.1644
		PLK5	PLK5	169	164	-3.1847	-2.1619
		WFDC10	WFDC10	8359	165	0.078	-2.1522
		GSTM1	GSTM1	8858	166	0.1308	-2.1468
		TRIM46	TRIM46	375	167	-2.3252	-2.1405
		PKP2	PKP2	826	168	-1.5523	-2.1399
		GSTM6	GSTM6	8418	169	0.0837	-2.1304
		HSD17B1	HSD17B1	4512	170	-0.2878	-2.1263
		RIPPLY1	RIPPLY1	37	171	-4.5765	-2.1251
		CDKN2A	CDKN2A	11469	172	0.6228	-2.11
		GM8096	GM8096	2882	173	-0.523	-2.1062
		SOX18	SOX18	266	174	-2.69	-2.0997
		DPYS	DPYS	1637	175	-0.8968	-2.0945
		GBE1	GBE1	855	176	-1.522	-2.0928
		JAG1	JAG1	9421	177	0.2042	-2.0898
		LDHC	LDHC	11926	178	0.8718	-2.0874
		AOC3	AOC3	511	179	-2.0108	-2.0852
		SUSD5	SUSD5	788	180	-1.5943	-2.0807
		GIMAP9	GIMAP9	1566	181	-0.9404	-2.0778
		ALDH1B1	ALDH1B1	2271	182	-0.6616	-2.0765
		CD24A	CD24A	1213	183	-1.1662	-2.0738
		SFMBT2	SFMBT2	655	184	-1.7632	-2.0691
		RNF122	RNF122	1193	185	-1.1819	-2.068
		4930470H14RIK	4930470H14RIK	409	186	-2.2067	-2.0672
		ESPN	ESPN	2784	187	-0.5396	-2.0664
		VLDLR	VLDLR	7438	188	-0.0132	-2.0581
		GM3414	GM3414	1358	189	-1.0703	-2.0578
		CRYBB3	CRYBB3	6207	190	-0.1259	-2.0554
		PKLR	PKLR	5279	191	-0.212	-2.0529
		GRAMD3	GRAMD3	104	192	-3.6546	-2.0511
		SPNB3	SPNB3	482	193	-2.0645	-2.051
		1700020N15RIK	1700020N15RIK	153	194	-3.2667	-2.0494
		UNC13D	UNC13D	12056	195	0.9846	-2.0487
		CCDC36	CCDC36	723	196	-1.6748	-2.0465
		IMPACT	IMPACT	1616	197	-0.9107	-2.0445
		MAPK13	MAPK13	1627	198	-0.9039	-2.0411
		JAG2	JAG2	603	199	-1.8342	-2.0402
		ADM	ADM	819	200	-1.5586	-2.0379
		GM8300	GM8300	1011	201	-1.3418	-2.0278
		EPT1	EPT1	3272	202	-0.4474	-2.0261
		4931428F04RIK	4931428F04RIK	2281	203	-0.658	-2.0242
		CASP3	CASP3	1357	204	-1.0708	-2.023
		CAR6	CAR6	3063	205	-0.4894	-2.015
		ITGAL	ITGAL	5327	206	-0.207	-2.0057
		PCGF5	PCGF5	1807	207	-0.8192	-2.0001
		SPNA1	SPNA1	2	208	-6.5759	-1.9975
		IZUMO1	IZUMO1	3518	209	-0.4073	-1.9964
		PHLDB3	PHLDB3	8793	210	0.1227	-1.9959
		BC068157	BC068157	1045	211	-1.3033	-1.9946
		EGR1	EGR1	6	212	-5.7977	-1.9945
		1700102H20RIK	1700102H20RIK	3027	213	-0.496	-1.9939
		CDCP1	CDCP1	577	214	-1.8713	-1.9917
		PGF	PGF	672	215	-1.7381	-1.9901
		CLSTN3	CLSTN3	4209	216	-0.3219	-1.9887
		SVIP	SVIP	1771	217	-0.8321	-1.9884
		MUP6	MUP6	241	218	-2.7797	-1.9881
		TSC22D3	TSC22D3	4040	219	-0.3397	-1.9863
		LEFTY2	LEFTY2	12009	220	0.9324	-1.9823
		1700030F04RIK	1700030F04RIK	1481	221	-0.9871	-1.9821
		BCL2L14	BCL2L14	12580	222	2.0782	-1.9791
		RORA	RORA	1931	223	-0.7717	-1.9762
		HIF3A	HIF3A	1439	224	-1.0144	-1.9658
		UPK1A	UPK1A	6673	225	-0.0847	-1.9653
		ZAP70	ZAP70	5005	226	-0.2387	-1.965
		TNFRSF25	TNFRSF25	7281	227	-0.0281	-1.9647
		LIN28B	LIN28B	464	228	-2.0909	-1.9626
		GM514	GM514	11010	229	0.4718	-1.9624
		MPP3	MPP3	825	230	-1.5525	-1.9602
		SH2D5	SH2D5	1585	231	-0.9295	-1.9568
		BRPF3	BRPF3	2058	232	-0.7268	-1.955
		SNORA33	SNORA33	675	233	-1.7339	-1.9519
		EGLN1	EGLN1	3035	234	-0.4947	-1.9454
		CCDC60	CCDC60	226	235	-2.8453	-1.9417
		ID2	ID2	160	236	-3.2322	-1.9416
		TRIM54	TRIM54	907	237	-1.4667	-1.9412
		D8ERTD82E	D8ERTD82E	1243	238	-1.1439	-1.941
		0610040F04RIK	0610040F04RIK	669	239	-1.7456	-1.9391
		CPNE2	CPNE2	2216	240	-0.6763	-1.9351
		GM10664	GM10664	7390	241	-0.0187	-1.933
		TCTE2	TCTE2	366	242	-2.3391	-1.9321
		SELENBP1	SELENBP1	4848	243	-0.256	-1.9289
		RXRG	RXRG	23	244	-5.014	-1.9271
		RPS6KL1	RPS6KL1	2143	245	-0.6921	-1.9255
		2610037D02RIK	2610037D02RIK	97	246	-3.775	-1.9233
		DMRTC2	DMRTC2	12147	247	1.0749	-1.9132
		INA	INA	18	248	-5.2288	-1.9126
		MS4A6D	MS4A6D	362	249	-2.3508	-1.9111
		NSMAF	NSMAF	2248	250	-0.6686	-1.9107
		SCT	SCT	276	251	-2.6482	-1.9105
		MEG3	MEG3	11385	252	0.5915	-1.9068
		UTRN	UTRN	955	253	-1.4083	-1.9048
		SH3BGRL	SH3BGRL	1798	254	-0.8258	-1.8997
		MARVELD3	MARVELD3	279	255	-2.6318	-1.8897
		CPHX	CPHX	529	256	-1.9556	-1.8843
		PHGDH	PHGDH	3434	257	-0.422	-1.8836
		EVC2	EVC2	319	258	-2.4929	-1.8832
		GSTM7	GSTM7	2059	259	-0.7265	-1.8823
		SULF1	SULF1	311	260	-2.5306	-1.8766
		ARAP3	ARAP3	158	261	-3.2405	-1.8714
		PLA2G2E	PLA2G2E	472	262	-2.0785	-1.8707
		TMEM184A	TMEM184A	401	263	-2.2285	-1.8696
		B020004J07RIK	B020004J07RIK	1352	264	-1.0722	-1.868
		FGF13	FGF13	8501	265	0.0922	-1.8669
		RIAN	RIAN	10664	266	0.3965	-1.866
		GM13119	GM13119	2134	267	-0.6974	-1.8654
		SLC45A1	SLC45A1	283	268	-2.6175	-1.8573
		PSTPIP1	PSTPIP1	3537	269	-0.4048	-1.8521
		PLAC8	PLAC8	52	270	-4.2999	-1.8507
		INSL6	INSL6	908	271	-1.4665	-1.8504
		EYA1	EYA1	12493	272	1.6932	-1.8502
		B230206H07RIK	B230206H07RIK	2681	273	-0.5634	-1.8492
		CCDC102A	CCDC102A	697	274	-1.7075	-1.8486
		WDYHV1	WDYHV1	6119	275	-0.134	-1.8431
		GM4858	GM4858	703	276	-1.695	-1.8326
		SCARNA13	SCARNA13	729	277	-1.6689	-1.8298
		FAM57B	FAM57B	106	278	-3.6493	-1.8251
		IGFBPL1	IGFBPL1	496	279	-2.0347	-1.825
		MIR1906-1	MIR1906-1	10725	280	0.4056	-1.8235
		EIF4G3	EIF4G3	335	281	-2.4326	-1.822
		TAGLN3	TAGLN3	11203	282	0.5299	-1.8195
		FZD2	FZD2	1259	283	-1.1356	-1.819
		1700030L20RIK	1700030L20RIK	959	284	-1.4063	-1.8137
		SNORA75	SNORA75	164	285	-3.2074	-1.8136
		UPK2	UPK2	4307	286	-0.311	-1.8096
		MAP3K15	MAP3K15	1297	287	-1.1148	-1.8028
		SLC35F2	SLC35F2	4577	288	-0.2822	-1.8018
		CAMK1	CAMK1	6600	289	-0.0904	-1.8007
		USP28	USP28	1880	290	-0.7893	-1.7998
		RASD2	RASD2	466	291	-2.0864	-1.799
		GM2022	GM2022	1030	292	-1.316	-1.7968
		PKIA	PKIA	424	293	-2.1844	-1.7946
		SNORA69	SNORA69	11775	294	0.7705	-1.7926
		TRIM12A	TRIM12A	1048	295	-1.2986	-1.7919
		GM98	GM98	112	296	-3.5802	-1.7867
		EFCAB4A	EFCAB4A	849	297	-1.5276	-1.7861
		R3HDML	R3HDML	216	298	-2.886	-1.7814
		CNN1	CNN1	21	299	-5.0873	-1.7814
		2310043J07RIK	2310043J07RIK	90	300	-3.7991	-1.777
		4930583H14RIK	4930583H14RIK	5412	301	-0.1991	-1.7751
		SOX12	SOX12	1745	302	-0.8426	-1.7744
		PLAC1	PLAC1	326	303	-2.4607	-1.772
		TMEM121	TMEM121	2336	304	-0.6402	-1.7709
		TDRD5	TDRD5	89	305	-3.8011	-1.77
		CCDC64	CCDC64	880	306	-1.4907	-1.7669
		2610018G03RIK	2610018G03RIK	434	307	-2.1569	-1.7606
		1700019A02RIK	1700019A02RIK	517	308	-1.998	-1.7593
		NELF	NELF	559	309	-1.8935	-1.7564
		1810019D21RIK	1810019D21RIK	1303	310	-1.1114	-1.7528
		LGALS1	LGALS1	1433	311	-1.0165	-1.7504
		EPHX2	EPHX2	10297	312	0.3302	-1.7503
		TNFAIP8	TNFAIP8	9226	313	0.1781	-1.7497
		EHD2	EHD2	245	314	-2.7735	-1.7495
		FZD7	FZD7	461	315	-2.1029	-1.7487
		PXT1	PXT1	2669	316	-0.5656	-1.7473
		GM2016	GM2016	1257	317	-1.1364	-1.7412
		PIWIL2	PIWIL2	368	318	-2.3361	-1.7409
		LRRN4	LRRN4	980	319	-1.3788	-1.7391
		JAK3	JAK3	4866	320	-0.2524	-1.7383
		GPR56	GPR56	1810	321	-0.8179	-1.7338
		OLFR856-PS1	OLFR856-PS1	548	322	-1.9123	-1.7324
		GDAP1L1	GDAP1L1	50	323	-4.35	-1.7309
		KCTD15	KCTD15	1365	324	-1.0616	-1.7297
		SERTAD4	SERTAD4	951	325	-1.4115	-1.7202
		CNTNAP2	CNTNAP2	11416	326	0.6033	-1.719
		GATM	GATM	817	327	-1.5602	-1.718
		MT4	MT4	66	328	-4.0109	-1.7177
		GNB4	GNB4	3957	329	-0.3497	-1.7177
		TMEM45A	TMEM45A	1535	330	-0.9569	-1.7176
		MLANA	MLANA	3032	331	-0.495	-1.7139
		4930447C04RIK	4930447C04RIK	713	332	-1.6826	-1.7095
		MIRG	MIRG	10085	333	0.2934	-1.7044
		VWA5A	VWA5A	2708	334	-0.5587	-1.7036
		EMID2	EMID2	11534	335	0.6519	-1.7032
		EPS8L2	EPS8L2	8524	336	0.0947	-1.7021
		RAPH1	RAPH1	2828	337	-0.5312	-1.7014
		CNGB1	CNGB1	709	338	-1.6877	-1.7009
		FOXI3	FOXI3	231	339	-2.8305	-1.6995
		EVC	EVC	134	340	-3.4277	-1.6992
		BB287469	BB287469	1132	341	-1.2294	-1.6983
		IL23A	IL23A	5804	342	-0.1631	-1.6969
		NEFH	NEFH	475	343	-2.0738	-1.6951
		DDR1	DDR1	717	344	-1.681	-1.6938
		JPH3	JPH3	197	345	-2.9389	-1.6923
		HMHA1	HMHA1	920	346	-1.4543	-1.6919
		DUB1	DUB1	1144	347	-1.2216	-1.6916
		SNORD100	SNORD100	12211	348	1.1518	-1.6904
		EEF2K	EEF2K	1792	349	-0.8275	-1.6851
		DTD1	DTD1	780	350	-1.6006	-1.6848
		NDRG1	NDRG1	10390	351	0.3468	-1.6847
		LDHD	LDHD	3058	352	-0.4904	-1.684
		RASSF6	RASSF6	247	353	-2.7691	-1.6837
		HPS3	HPS3	847	354	-1.5285	-1.6834
		WSCD1	WSCD1	249	355	-2.7584	-1.6776
		SMAGP	SMAGP	2660	356	-0.5662	-1.677
		AA792892	AA792892	1198	357	-1.178	-1.6752
		CELF2	CELF2	10909	358	0.4486	-1.6741
		PBX3	PBX3	1360	359	-1.0691	-1.6706
		KITL	KITL	1437	360	-1.0146	-1.6655
		ARTN	ARTN	116	361	-3.5254	-1.6621
		VWF	VWF	11621	362	0.6891	-1.6601
		CNPY1	CNPY1	11423	363	0.6053	-1.6583
		G2E3	G2E3	1118	364	-1.2464	-1.6582
		1700001O22RIK	1700001O22RIK	10106	365	0.297	-1.6579
		CDKN2B	CDKN2B	5022	366	-0.2368	-1.6573
		ALDH1A2	ALDH1A2	3109	367	-0.4789	-1.6568
		GM7102	GM7102	1012	368	-1.3373	-1.6537
		NKX3-1	NKX3-1	298	369	-2.5696	-1.653
		TMEM98	TMEM98	2259	370	-0.6663	-1.6529
		ADM2	ADM2	10242	371	0.3202	-1.6517
		4930502E18RIK	4930502E18RIK	10078	372	0.2926	-1.6497
		TPK1	TPK1	4547	373	-0.2853	-1.6497
		KLHL23	KLHL23	1031	374	-1.3151	-1.6467
		HES2	HES2	280	375	-2.628	-1.6465
		RAB34	RAB34	1510	376	-0.9701	-1.6463
		LY6G5C	LY6G5C	3348	377	-0.4363	-1.646
		FOXH1	FOXH1	5436	378	-0.1968	-1.6459
		PLCXD1	PLCXD1	699	379	-1.7052	-1.6456
		CPN1	CPN1	2267	380	-0.6632	-1.6446
		ADAM19	ADAM19	9291	381	0.1864	-1.6433
		DTNA	DTNA	126	382	-3.4674	-1.6433
		SEMA3E	SEMA3E	122	383	-3.4982	-1.6426
		F830016B08RIK	F830016B08RIK	659	384	-1.7567	-1.6418
		RBP1	RBP1	3136	385	-0.4741	-1.6395
		CELSR2	CELSR2	528	386	-1.9615	-1.6368
		TYMP	TYMP	514	387	-2.0018	-1.6352
		CIB2	CIB2	1467	388	-0.9993	-1.6325
		NCRNA00086	NCRNA00086	3439	389	-0.4213	-1.6319
		MID1	MID1	12569	390	1.9914	-1.6311
		4933431E20RIK	4933431E20RIK	616	391	-1.8193	-1.6296
		SRGAP3	SRGAP3	3097	392	-0.4807	-1.6291
		PRPS1	PRPS1	7949	393	0.0358	-1.628
		ACOT1	ACOT1	3701	394	-0.3824	-1.6237
		RPS6KA6	RPS6KA6	1215	395	-1.1627	-1.6236
		PALM2	PALM2	187	396	-3.0058	-1.6177
		WIPF1	WIPF1	6588	397	-0.0918	-1.6172
		IRGM2	IRGM2	3406	398	-0.4262	-1.6157
		PPP1R1B	PPP1R1B	162	399	-3.2232	-1.6151
		CHN1	CHN1	3376	400	-0.4321	-1.6148
		AHR	AHR	11565	401	0.6627	-1.6117
		ZBTB32	ZBTB32	2697	402	-0.5601	-1.6102
		FUBP1	FUBP1	1567	403	-0.9401	-1.6086
		PLEKHG4	PLEKHG4	876	404	-1.4932	-1.6074
		ATP6V0A4	ATP6V0A4	2641	405	-0.5712	-1.6058
		ANKRD37	ANKRD37	2834	406	-0.5298	-1.6057
		FOXR2	FOXR2	404	407	-2.2184	-1.6057
		MAPK8IP2	MAPK8IP2	6733	408	-0.0794	-1.6028
		BNIPL	BNIPL	595	409	-1.8457	-1.6013
		GALNT7	GALNT7	1081	410	-1.2778	-1.5995
		FGFBP1	FGFBP1	814	411	-1.5619	-1.5986
		LRP3	LRP3	1874	412	-0.7909	-1.5941
		UPRT	UPRT	2471	413	-0.6053	-1.5932
		DES	DES	972	414	-1.3878	-1.5924
		EVPL	EVPL	390	415	-2.2727	-1.5924
		PCSK4	PCSK4	1324	416	-1.0959	-1.5909
		MIP	MIP	1491	417	-0.9816	-1.5904
		SNORA44	SNORA44	1208	418	-1.1704	-1.5885
		PTPN6	PTPN6	6206	419	-0.126	-1.5855
		FAM43B	FAM43B	290	420	-2.5832	-1.5832
		CCDC64B	CCDC64B	203	421	-2.9344	-1.5828
		SLC46A3	SLC46A3	4458	422	-0.2936	-1.5828
		NFKBIZ	NFKBIZ	1359	423	-1.0701	-1.5824
		D17ERTD648E	D17ERTD648E	1191	424	-1.1825	-1.5819
		5430407P10RIK	5430407P10RIK	5228	425	-0.2169	-1.5818
		GCHFR	GCHFR	550	426	-1.9105	-1.581
		RAB27A	RAB27A	208	427	-2.913	-1.5809
		CCDC40	CCDC40	510	428	-2.0114	-1.5762
		RGS11	RGS11	232	429	-2.8262	-1.5759
		NMI	NMI	1076	430	-1.282	-1.5741
		HESX1	HESX1	10354	431	0.341	-1.573
		SCRN1	SCRN1	662	432	-1.7553	-1.5728
		KIF21A	KIF21A	505	433	-2.017	-1.5716
		EPB4.1L3	EPB4.1L3	718	434	-1.6809	-1.5714
		CD3E	CD3E	11774	435	0.7702	-1.5705
		HMGN5	HMGN5	1152	436	-1.2176	-1.5702
		RHOBTB3	RHOBTB3	7160	437	-0.0384	-1.5698
		OGFRL1	OGFRL1	2333	438	-0.6408	-1.5683
		FAM115C	FAM115C	543	439	-1.9277	-1.5656
		PYGL	PYGL	8689	440	0.1134	-1.5573
		PARP9	PARP9	1276	441	-1.124	-1.5569
		FN3K	FN3K	114	442	-3.5464	-1.5567
		PLA2G4A	PLA2G4A	807	443	-1.5661	-1.5563
		RGS10	RGS10	800	444	-1.5756	-1.5545
		HIST3H2BA	HIST3H2BA	235	445	-2.8099	-1.55
		FAM115A	FAM115A	1032	446	-1.3144	-1.5484
		CSRNP3	CSRNP3	715	447	-1.682	-1.5482
		SELENBP2	SELENBP2	3843	448	-0.3638	-1.5444
		PUS7L	PUS7L	3258	449	-0.4495	-1.5442
		RAB33A	RAB33A	6366	450	-0.1116	-1.5407
		PMEL	PMEL	1241	451	-1.1445	-1.5376
		HSD11B2	HSD11B2	1024	452	-1.3273	-1.5376
		CCDC8	CCDC8	1527	453	-0.9611	-1.536
		URGCP	URGCP	1428	454	-1.0186	-1.5341
		DTX3L	DTX3L	1217	455	-1.1612	-1.5337
		CD164L2	CD164L2	3099	456	-0.4802	-1.5314
		AXL	AXL	4331	457	-0.3073	-1.5312
		SLC40A1	SLC40A1	156	458	-3.2468	-1.5308
		NAMPT	NAMPT	3256	459	-0.4496	-1.53
		SLC16A6	SLC16A6	7278	460	-0.0283	-1.53
		TERC	TERC	6196	461	-0.1267	-1.5299
		SNURF	SNURF	255	462	-2.7278	-1.5293
		TM4SF5	TM4SF5	1834	463	-0.8078	-1.5259
		DUSP26	DUSP26	328	464	-2.4503	-1.5254
		CDS1	CDS1	380	465	-2.3001	-1.5249
		LGR4	LGR4	953	466	-1.4095	-1.5234
		PSAT1	PSAT1	8090	467	0.0516	-1.5219
		HPCA	HPCA	1029	468	-1.3164	-1.5192
		GM12238	GM12238	846	469	-1.5329	-1.5187
		PITX2	PITX2	10075	470	0.292	-1.5182
		DCDC2C	DCDC2C	1328	471	-1.0932	-1.5181
		IL28RA	IL28RA	10049	472	0.2886	-1.5159
		KLF17	KLF17	411	473	-2.2033	-1.5156
		HMOX1	HMOX1	923	474	-1.4481	-1.5107
		AUTS2	AUTS2	9835	475	0.2569	-1.507
		CDC42EP5	CDC42EP5	10709	476	0.4024	-1.5062
		KCTD19	KCTD19	1403	477	-1.0325	-1.505
		TOR3A	TOR3A	722	478	-1.676	-1.5046
		MBOAT1	MBOAT1	320	479	-2.4919	-1.504
		DLK1	DLK1	120	480	-3.5145	-1.5038
		HMGXB4	HMGXB4	802	481	-1.5726	-1.5013
		ERAP1	ERAP1	1879	482	-0.7893	-1.5005
		FBLN1	FBLN1	10913	483	0.45	-1.4996
		TRIM2	TRIM2	864	484	-1.5141	-1.4979
		IRF6	IRF6	2019	485	-0.738	-1.4967
		GNE	GNE	1242	486	-1.1442	-1.4929
		SH2B2	SH2B2	1431	487	-1.0177	-1.4887
		CLDN9	CLDN9	301	488	-2.5555	-1.4872
		SPIN2	SPIN2	605	489	-1.8297	-1.4861
		KLF7	KLF7	714	490	-1.6821	-1.4847
		PALLD	PALLD	730	491	-1.6682	-1.4802
		ALOX5AP	ALOX5AP	843	492	-1.5344	-1.4779
		UBE2E1	UBE2E1	1905	493	-0.7815	-1.4777
		SNORA43	SNORA43	4658	494	-0.2747	-1.4776
		SETD7	SETD7	732	495	-1.6628	-1.4753
		ETV2	ETV2	7198	496	-0.0344	-1.4753
		PSD4	PSD4	488	497	-2.0477	-1.4752
		EMB	EMB	179	498	-3.0927	-1.4744
		NCAN	NCAN	109	499	-3.6089	-1.4743
		CLPS	CLPS	1606	500	-0.9151	-1.4738
		GRHL1	GRHL1	711	501	-1.6833	-1.4721
		FKBP7	FKBP7	4939	502	-0.245	-1.4708
		4933436C20RIK	4933436C20RIK	2115	503	-0.7066	-1.469
		PDZK1	PDZK1	924	504	-1.447	-1.4688
		1700128F08RIK	1700128F08RIK	2446	505	-0.6115	-1.4684
		5730409E04RIK	5730409E04RIK	1293	506	-1.1161	-1.4682
		PTPN18	PTPN18	1325	507	-1.0941	-1.4671
		PNMA3	PNMA3	12309	508	1.298	-1.4652
		OAS3	OAS3	1974	509	-0.7518	-1.4635
		STAB1	STAB1	1034	510	-1.3134	-1.4634
		ACCN2	ACCN2	1513	511	-0.9697	-1.4623
		CPNE7	CPNE7	1038	512	-1.3116	-1.4614
		LAD1	LAD1	5587	513	-0.1828	-1.4612
		SGMS1	SGMS1	7966	514	0.0376	-1.4595
		SMS	SMS	751	515	-1.64	-1.4593
		SKIL	SKIL	525	516	-1.9652	-1.4589
		GRHL3	GRHL3	5810	517	-0.1627	-1.4566
		DNMT3B	DNMT3B	476	518	-2.0718	-1.4555
		KIF21B	KIF21B	11779	519	0.7721	-1.4539
		BAIAP2L1	BAIAP2L1	1622	520	-0.9069	-1.4511
		MFHAS1	MFHAS1	1344	521	-1.0792	-1.4498
		GPX2	GPX2	1133	522	-1.2293	-1.4497
		OLFM2	OLFM2	503	523	-2.0204	-1.4494
		MAP4K4	MAP4K4	1959	524	-0.7609	-1.4493
		PIM2	PIM2	460	525	-2.1041	-1.4483
		NAT8L	NAT8L	119	526	-3.5153	-1.4461
		SLC38A3	SLC38A3	919	527	-1.4546	-1.4454
		SEPP1	SEPP1	253	528	-2.7304	-1.4406
		FITM1	FITM1	766	529	-1.6208	-1.4397
		EGLN3	EGLN3	967	530	-1.3956	-1.4379
		TRPV4	TRPV4	8978	531	0.1447	-1.4354
		WWC2	WWC2	8796	532	0.1231	-1.4347
		HOMER2	HOMER2	2186	533	-0.683	-1.4308
		COL5A3	COL5A3	85	534	-3.8247	-1.428
		MTAP7D3	MTAP7D3	93	535	-3.7931	-1.4275
		GAS1	GAS1	5854	536	-0.1595	-1.4264
		PPP1R3B	PPP1R3B	11188	537	0.5271	-1.4261
		PHF16	PHF16	6701	538	-0.0821	-1.4256
		1500012F01RIK	1500012F01RIK	8533	539	0.0964	-1.4241
		BSPRY	BSPRY	1127	540	-1.2343	-1.4239
		SNAI3	SNAI3	115	541	-3.5405	-1.4237
		RIPK2	RIPK2	3252	542	-0.451	-1.4207
		SORD	SORD	965	543	-1.398	-1.4186
		ODF2L	ODF2L	2603	544	-0.5788	-1.4173
		RLN3	RLN3	1795	545	-0.8272	-1.4172
		NEUROD1	NEUROD1	16	546	-5.3139	-1.4161
		GM10451	GM10451	6117	547	-0.1342	-1.4128
		MLXIPL	MLXIPL	3866	548	-0.3608	-1.4121
		CD79B	CD79B	11310	549	0.561	-1.4092
		FAM83G	FAM83G	1256	550	-1.1365	-1.4088
		IRF8	IRF8	148	551	-3.2966	-1.4082
		STMN1	STMN1	882	552	-1.4882	-1.4082
		DUSP7	DUSP7	1920	553	-0.7764	-1.4077
		PTBP2	PTBP2	1599	554	-0.9175	-1.4071
		CXX1C	CXX1C	11386	555	0.5916	-1.4059
		GPX2-PS1	GPX2-PS1	1556	556	-0.9446	-1.4035
		SYCP3	SYCP3	285	557	-2.6074	-1.4017
		ZFP821	ZFP821	2398	558	-0.624	-1.3999
		ATP8B3	ATP8B3	1541	559	-0.9548	-1.3983
		CHD7	CHD7	513	560	-2.0045	-1.3979
		LIMA1	LIMA1	11671	561	0.7149	-1.3969
		SLC43A1	SLC43A1	891	562	-1.4823	-1.3954
		CD2	CD2	1649	563	-0.8856	-1.3943
		D630045J12RIK	D630045J12RIK	2326	564	-0.6425	-1.3942
		FAM13C	FAM13C	6295	565	-0.1181	-1.3941
		PCDHGA1	PCDHGA1	2957	566	-0.5092	-1.3935
		SNORA17	SNORA17	1369	567	-1.0585	-1.3922
		RLN1	RLN1	1199	568	-1.1778	-1.3886
		LINGO3	LINGO3	746	569	-1.6437	-1.3876
		MMP9	MMP9	509	570	-2.0137	-1.3869
		PCP4L1	PCP4L1	820	571	-1.5566	-1.3868
		TJP3	TJP3	1109	572	-1.2533	-1.3827
		NAAA	NAAA	613	573	-1.8214	-1.3826
		GATSL3	GATSL3	1591	574	-0.9238	-1.3815
		TMEM74	TMEM74	474	575	-2.0773	-1.3806
		AASS	AASS	580	576	-1.8675	-1.3781
		DICER1	DICER1	2542	577	-0.5886	-1.3779
		SLAIN1	SLAIN1	1114	578	-1.2482	-1.3765
		GM16880	GM16880	345	579	-2.4054	-1.3703
		VPS37D	VPS37D	2498	580	-0.599	-1.3698
		PPM1H	PPM1H	1151	581	-1.2183	-1.3665
		KCNH6	KCNH6	586	582	-1.8631	-1.3658
		TSPAN17	TSPAN17	2148	583	-0.6911	-1.3648
		BHLHE40	BHLHE40	3818	584	-0.3673	-1.3644
		GM6812	GM6812	186	585	-3.0156	-1.3628
		SLC25A5	SLC25A5	6340	586	-0.1141	-1.3625
		SLC16A3	SLC16A3	2043	587	-0.7308	-1.3603
		PIWIL4	PIWIL4	49	588	-4.3789	-1.3585
		FAM163B	FAM163B	272	589	-2.6628	-1.3513
		SNORD96A	SNORD96A	7457	590	-0.0113	-1.3503
		BC013712	BC013712	355	591	-2.3692	-1.3492
		FAM102B	FAM102B	3420	592	-0.4237	-1.3489
		USP43	USP43	5299	593	-0.2104	-1.3486
		CCDC164	CCDC164	39	594	-4.5255	-1.3472
		WNT7B	WNT7B	75	595	-3.8922	-1.3469
		H2-M3	H2-M3	1670	596	-0.8749	-1.344
		PLEKHA2	PLEKHA2	10880	597	0.44	-1.3417
		HLTF	HLTF	1793	598	-0.8273	-1.339
		SEC14L4	SEC14L4	2420	599	-0.6178	-1.3385
		HAPLN4	HAPLN4	498	600	-2.0298	-1.3362
		DIRAS1	DIRAS1	194	601	-2.9719	-1.3342
		CPA2	CPA2	323	602	-2.4798	-1.3329
		CCDC113	CCDC113	997	603	-1.3606	-1.3308
		IER3	IER3	1717	604	-0.856	-1.3301
		ACOT2	ACOT2	4588	605	-0.2817	-1.3299
		SORBS1	SORBS1	2480	606	-0.6023	-1.3294
		GLDC	GLDC	387	607	-2.2841	-1.3282
		RCBTB2	RCBTB2	1529	608	-0.9594	-1.327
		SGK3	SGK3	5978	609	-0.1465	-1.3259
		ARNTL2	ARNTL2	685	610	-1.7177	-1.3226
		TEC	TEC	2826	611	-0.5313	-1.3202
		INHBC	INHBC	569	612	-1.8782	-1.3189
		1600014C23RIK	1600014C23RIK	1111	613	-1.2513	-1.3189
		TARSL2	TARSL2	1895	614	-0.7834	-1.3188
		MMP2	MMP2	342	615	-2.4195	-1.3175
		SYCE3	SYCE3	821	616	-1.5547	-1.3166
		TCEAL1	TCEAL1	1756	617	-0.8377	-1.3152
		AFF3	AFF3	54	618	-4.2567	-1.3126
		XKR5	XKR5	929	619	-1.4419	-1.3123
		LIPA	LIPA	3184	620	-0.4647	-1.3122
		CSRNP1	CSRNP1	1910	621	-0.7791	-1.312
		TMEM80	TMEM80	1794	622	-0.8272	-1.3104
		AGRP	AGRP	2391	623	-0.6253	-1.3096
		SHC2	SHC2	237	624	-2.8039	-1.3096
		SNHG8	SNHG8	4708	625	-0.2697	-1.3067
		RBP7	RBP7	144	626	-3.3258	-1.3066
		B3GNT7	B3GNT7	334	627	-2.4337	-1.3045
		ZFP362	ZFP362	2496	628	-0.5998	-1.3032
		DTX1	DTX1	2732	629	-0.5523	-1.3025
		PLEKHG5	PLEKHG5	6679	630	-0.0843	-1.3011
		MEST	MEST	364	631	-2.3463	-1.3005
		BEND3	BEND3	742	632	-1.6481	-1.2993
		RAP1GAP	RAP1GAP	5551	633	-0.1874	-1.2988
		PTCH1	PTCH1	447	634	-2.1319	-1.2979
		6230427J02RIK	6230427J02RIK	3900	635	-0.3572	-1.2976
		FOXRED2	FOXRED2	3825	636	-0.366	-1.2957
		PAK1	PAK1	9231	637	0.1794	-1.2947
		TULP1	TULP1	1089	638	-1.2688	-1.2925
		SOAT1	SOAT1	527	639	-1.9644	-1.2924
		SULT5A1	SULT5A1	976	640	-1.381	-1.2915
		PCBP4	PCBP4	1290	641	-1.1171	-1.2912
		ZHX1	ZHX1	1125	642	-1.2356	-1.2908
		SNORD69	SNORD69	9741	643	0.2447	-1.2895
		CD72	CD72	1110	644	-1.252	-1.2873
		MYO5A	MYO5A	621	645	-1.811	-1.2873
		EPHA1	EPHA1	98	646	-3.7652	-1.2871
		TRIM47	TRIM47	444	647	-2.1403	-1.2852
		BCL6B	BCL6B	69	648	-3.9811	-1.2842
		SNORA41	SNORA41	571	649	-1.8775	-1.2841
		GAP43	GAP43	31	650	-4.7449	-1.2839
		CAR14	CAR14	575	651	-1.8736	-1.2839
		PCSK9	PCSK9	108	652	-3.6216	-1.2838
		TNFRSF19	TNFRSF19	12521	653	1.8087	-1.2827
		SNX25	SNX25	2174	654	-0.6859	-1.2827
		CCDC160	CCDC160	11337	655	0.5696	-1.2824
		SCUBE3	SCUBE3	9608	656	0.2276	-1.2822
		CASS4	CASS4	308	657	-2.5365	-1.2814
		LIN28A	LIN28A	305	658	-2.5431	-1.2804
		TGIF2	TGIF2	1614	659	-0.9112	-1.2798
		WAS	WAS	11581	660	0.6719	-1.279
		SPEG	SPEG	293	661	-2.5782	-1.2763
		ASH2L	ASH2L	1865	662	-0.7951	-1.2758
		QSER1	QSER1	1054	663	-1.2942	-1.2749
		PDZD4	PDZD4	338	664	-2.4309	-1.2749
		CRYL1	CRYL1	1323	665	-1.0969	-1.2731
		PRKAR1B	PRKAR1B	9364	666	0.1954	-1.2722
		AMZ1	AMZ1	1254	667	-1.1369	-1.2694
		ARHGDIG	ARHGDIG	248	668	-2.761	-1.268
		ANK2	ANK2	383	669	-2.2934	-1.2671
		MFNG	MFNG	3596	670	-0.3975	-1.2669
		PDPN	PDPN	1075	671	-1.2822	-1.266
		SALL2	SALL2	7434	672	-0.014	-1.2634
		SYNE2	SYNE2	5555	673	-0.1868	-1.2619
		4933412E12RIK	4933412E12RIK	99	674	-3.7581	-1.2613
		PEG10	PEG10	61	675	-4.1258	-1.2603
		LYSMD2	LYSMD2	1164	676	-1.2051	-1.2598
		LIPI	LIPI	1036	677	-1.3123	-1.259
		SP110	SP110	1219	678	-1.1585	-1.2579
		FAM169A	FAM169A	810	679	-1.5645	-1.2573
		USP25	USP25	2066	680	-0.7251	-1.2559
		9430069I07RIK	9430069I07RIK	11	681	-5.5599	-1.2555
		EBF1	EBF1	12473	682	1.6178	-1.255
		GRB7	GRB7	538	683	-1.9373	-1.2542
		TMEM158	TMEM158	1662	684	-0.8791	-1.254
		AIG1	AIG1	7365	685	-0.0209	-1.2529
		SLC1A6	SLC1A6	1080	686	-1.279	-1.2521
		GPC3	GPC3	12070	687	1.0049	-1.2513
		RAB4A	RAB4A	4789	688	-0.2608	-1.2509
		MUP5	MUP5	182	689	-3.0264	-1.2508
		CPSF4L	CPSF4L	349	690	-2.392	-1.2507
		CACNB3	CACNB3	6685	691	-0.0832	-1.2507
		CELA2A	CELA2A	10491	692	0.3652	-1.2492
		NOVA2	NOVA2	11567	693	0.6633	-1.2482
		PLK3	PLK3	499	694	-2.0296	-1.2476
		FGFR1	FGFR1	4098	695	-0.3341	-1.2472
		PRICKLE1	PRICKLE1	870	696	-1.5014	-1.2472
		DZIP1L	DZIP1L	1067	697	-1.2872	-1.2471
		ZFP939	ZFP939	1841	698	-0.8052	-1.2439
		JPH1	JPH1	750	699	-1.6415	-1.2438
		ZC3HAV1L	ZC3HAV1L	10147	700	0.3037	-1.2431
		GJA1	GJA1	777	701	-1.6046	-1.2418
		ZMAT4	ZMAT4	53	702	-4.2704	-1.2416
		AA467197	AA467197	12673	703	3.3537	-1.2414
		SERPINE1	SERPINE1	533	704	-1.9505	-1.2411
		STMN1-RS1	STMN1-RS1	935	705	-1.4351	-1.2407
		SLC5A1	SLC5A1	9956	706	0.2742	-1.2406
		KIF13A	KIF13A	5002	707	-0.239	-1.2398
		MARVELD2	MARVELD2	3217	708	-0.4568	-1.2388
		PPP1R14A	PPP1R14A	4430	709	-0.2968	-1.2381
		SLC9A5	SLC9A5	1027	710	-1.325	-1.238
		NAT2	NAT2	12138	711	1.0628	-1.2378
		TOM1L1	TOM1L1	2024	712	-0.7358	-1.2342
		LMO1	LMO1	12482	713	1.6417	-1.2339
		TRPC1	TRPC1	351	714	-2.3884	-1.2332
		DNMBP	DNMBP	5244	715	-0.2153	-1.2308
		FBXO27	FBXO27	2476	716	-0.6042	-1.2308
		MIPOL1	MIPOL1	2867	717	-0.525	-1.2307
		PRRG3	PRRG3	12117	718	1.0481	-1.2304
		4930528F23RIK	4930528F23RIK	202	719	-2.9353	-1.2298
		RHD	RHD	2658	720	-0.5664	-1.2279
		FOXA3	FOXA3	331	721	-2.4356	-1.2248
		COL17A1	COL17A1	3632	722	-0.3931	-1.2232
		VGLL4	VGLL4	11484	723	0.6287	-1.222
		GM5634	GM5634	10118	724	0.2986	-1.221
		SNORD95	SNORD95	2154	725	-0.6897	-1.2201
		CALCA	CALCA	185	726	-3.0205	-1.2198
		TSPAN7	TSPAN7	626	727	-1.8055	-1.2194
		IL3RA	IL3RA	6826	728	-0.0706	-1.2188
		BEST2	BEST2	731	729	-1.6649	-1.2176
		NANOS3	NANOS3	2583	730	-0.5818	-1.2173
		LIPO1	LIPO1	5355	731	-0.2043	-1.2171
		SASH1	SASH1	11454	732	0.6174	-1.2149
		APOBR	APOBR	7357	733	-0.0218	-1.2147
		SLC22A7	SLC22A7	726	734	-1.6727	-1.2138
		MEF2B	MEF2B	491	735	-2.0429	-1.2135
		G0S2	G0S2	3586	736	-0.399	-1.2132
		CEBPB	CEBPB	2776	737	-0.5426	-1.2129
		E030011O05RIK	E030011O05RIK	12466	738	1.6077	-1.2128
		C77370	C77370	9674	739	0.2364	-1.2121
		TPM2	TPM2	865	740	-1.5121	-1.2113
		FGFR1OP	FGFR1OP	5120	741	-0.2282	-1.2111
		CTHRC1	CTHRC1	214	742	-2.8918	-1.2098
		SLC29A4	SLC29A4	1677	743	-0.8712	-1.2089
		RASGRP4	RASGRP4	9881	744	0.2642	-1.2084
		PNMA5	PNMA5	12397	745	1.4652	-1.2072
		FAM46B	FAM46B	1161	746	-1.2079	-1.2066
		LDHA	LDHA	2589	747	-0.5814	-1.2038
		SCN1B	SCN1B	1991	748	-0.7474	-1.2033
		0610007N19RIK	0610007N19RIK	9668	749	0.2359	-1.2031
		RGS9BP	RGS9BP	2123	750	-0.7047	-1.2017
		MUP4	MUP4	325	751	-2.4643	-1.1997
		HOOK1	HOOK1	724	752	-1.6743	-1.1994
		NT5DC2	NT5DC2	1113	753	-1.2491	-1.1992
		SHANK3	SHANK3	1612	754	-0.9132	-1.1991
		HMGB3	HMGB3	9661	755	0.2342	-1.1971
		ADK	ADK	832	756	-1.5447	-1.196
		1700097N02RIK	1700097N02RIK	8519	757	0.0945	-1.1954
		ANK3	ANK3	9292	758	0.1865	-1.1953
		RGS16	RGS16	369	759	-2.3359	-1.1951
		RASAL1	RASAL1	9386	760	0.1985	-1.1943
		DHRS7	DHRS7	6680	761	-0.0841	-1.1937
		2010204K13RIK	2010204K13RIK	286	762	-2.6039	-1.1936
		SPNB1	SPNB1	4005	763	-0.3428	-1.1928
		PSMB10	PSMB10	639	764	-1.786	-1.1883
		ZFP174	ZFP174	2838	765	-0.5292	-1.1883
		DEGS2	DEGS2	6949	766	-0.0604	-1.1867
		NUDT14	NUDT14	3363	767	-0.4342	-1.1865
		SNHG5	SNHG5	8904	768	0.1358	-1.1863
		SNORA3	SNORA3	3322	769	-0.4397	-1.1844
		PRR19	PRR19	157	770	-3.2414	-1.1831
		MPP2	MPP2	1992	771	-0.7464	-1.1816
		KCNN4	KCNN4	228	772	-2.8378	-1.1815
		PIK3CD	PIK3CD	1916	773	-0.7782	-1.1813
		PHYHIP	PHYHIP	3574	774	-0.4001	-1.1799
		MANSC1	MANSC1	8510	775	0.0929	-1.1795
		ZIC5	ZIC5	1492	776	-0.9815	-1.1788
		NRN1L	NRN1L	760	777	-1.6255	-1.178
		TRIM56	TRIM56	1363	778	-1.0636	-1.1773
		5730559C18RIK	5730559C18RIK	2026	779	-0.7356	-1.1762
		TUBB3	TUBB3	512	780	-2.0078	-1.1744
		SEMA4D	SEMA4D	2316	781	-0.6466	-1.1729
		GM128	GM128	5331	782	-0.2064	-1.1725
		OPHN1	OPHN1	8479	783	0.0905	-1.1692
		SCARNA17	SCARNA17	5225	784	-0.2172	-1.169
		PDE4A	PDE4A	7370	785	-0.0206	-1.1689
		LPL	LPL	12525	786	1.8257	-1.1686
		MYH7B	MYH7B	12507	787	1.7576	-1.1664
		LDB3	LDB3	663	788	-1.7531	-1.1661
		BEND7	BEND7	2306	789	-0.6508	-1.166
		TES	TES	11646	790	0.7063	-1.1657
		H2AFY2	H2AFY2	4051	791	-0.3385	-1.1653
		JAK2	JAK2	8481	792	0.0908	-1.1649
		TFDP1	TFDP1	1915	793	-0.7782	-1.1647
		SMARCA1	SMARCA1	215	794	-2.8876	-1.164
		ALG13	ALG13	4546	795	-0.2854	-1.1634
		RGS14	RGS14	641	796	-1.7841	-1.1633
		ICAM4	ICAM4	11604	797	0.6833	-1.1619
		CPEB1	CPEB1	601	798	-1.835	-1.1601
		ZCCHC12	ZCCHC12	155	799	-3.2549	-1.16
		C1S	C1S	8916	800	0.1376	-1.1597
		LST1	LST1	2771	801	-0.5441	-1.1591
		CLDN5	CLDN5	1686	802	-0.8679	-1.1579
		GLI3	GLI3	2009	803	-0.7403	-1.1551
		XLR5B	XLR5B	2352	804	-0.6353	-1.155
		AIF1L	AIF1L	670	805	-1.7435	-1.1548
		CASQ1	CASQ1	65	806	-4.0438	-1.1546
		FGGY	FGGY	541	807	-1.9346	-1.1534
		APOL8	APOL8	124	808	-3.4873	-1.1532
		NDUFA4L2	NDUFA4L2	3333	809	-0.4381	-1.152
		ACTR3B	ACTR3B	1486	810	-0.9837	-1.1518
		RNF170	RNF170	11473	811	0.625	-1.1504
		OMP	OMP	1052	812	-1.2966	-1.1503
		GM6300	GM6300	1071	813	-1.2855	-1.1463
		MAGEB16	MAGEB16	10266	814	0.3245	-1.1462
		LCK	LCK	1066	815	-1.2886	-1.1462
		PREP	PREP	10549	816	0.3756	-1.1453
		NT5C2	NT5C2	1391	817	-1.0434	-1.1449
		ITGAV	ITGAV	11357	818	0.5777	-1.1443
		SULT2B1	SULT2B1	11496	819	0.633	-1.1434
		EMID1	EMID1	465	820	-2.0889	-1.1432
		FAM89A	FAM89A	574	821	-1.8737	-1.1417
		ZBTB38	ZBTB38	9836	822	0.2572	-1.1412
		SNORD22	SNORD22	6872	823	-0.0663	-1.1411
		2700023E23RIK	2700023E23RIK	5485	824	-0.1932	-1.1398
		ZFP773	ZFP773	10134	825	0.3009	-1.1395
		PIRT	PIRT	521	826	-1.9699	-1.1394
		CRYBG3	CRYBG3	889	827	-1.4857	-1.1358
		FAM83B	FAM83B	1948	828	-0.7663	-1.1357
		PTPRN	PTPRN	171	829	-3.1697	-1.1349
		MCF2L	MCF2L	791	830	-1.5893	-1.1345
		TMEM35	TMEM35	8798	831	0.1234	-1.1342
		GM18756	GM18756	635	832	-1.7937	-1.1342
		DENND1C	DENND1C	2624	833	-0.5737	-1.133
		TMSB15B2	TMSB15B2	2934	834	-0.514	-1.1327
		ELAVL2	ELAVL2	8862	835	0.1313	-1.1326
		AMMECR1	AMMECR1	2202	836	-0.6796	-1.132
		BCAS1	BCAS1	11777	837	0.7709	-1.1314
		HERC3	HERC3	5369	838	-0.2031	-1.1311
		NUDT19	NUDT19	6708	839	-0.0813	-1.1302
		TPI1	TPI1	6137	840	-0.1319	-1.1274
		RLIM	RLIM	457	841	-2.1086	-1.1235
		PLS3	PLS3	9735	842	0.244	-1.1233
		RLTPR	RLTPR	9939	843	0.2718	-1.1232
		REV1	REV1	2200	844	-0.6803	-1.1232
		MARVELD1	MARVELD1	1504	845	-0.9719	-1.1224
		MEI4	MEI4	3725	846	-0.3791	-1.1223
		SLC30A3	SLC30A3	756	847	-1.6322	-1.1203
		CFP	CFP	11928	848	0.8729	-1.1203
		TMSB15B1	TMSB15B1	1542	849	-0.9543	-1.1191
		RAB3B	RAB3B	2524	850	-0.5929	-1.1184
		CDH1	CDH1	6940	851	-0.0611	-1.1178
		HEY1	HEY1	938	852	-1.4296	-1.1174
		GSTM4	GSTM4	3850	853	-0.363	-1.1169
		MEX3D	MEX3D	1658	854	-0.8818	-1.1164
		ASB13	ASB13	11403	855	0.5988	-1.1161
		XLR5C	XLR5C	1875	856	-0.7903	-1.1156
		PREX1	PREX1	10267	857	0.3247	-1.1138
		RAB15	RAB15	4595	858	-0.2811	-1.1138
		1700001L05RIK	1700001L05RIK	4770	859	-0.2624	-1.1136
		PGK1	PGK1	5093	860	-0.2305	-1.1134
		PEG3AS	PEG3AS	702	861	-1.6993	-1.1128
		GSTM5	GSTM5	1140	862	-1.2244	-1.1128
		ALDH3B1	ALDH3B1	1674	863	-0.8729	-1.1119
		GTF2I	GTF2I	1235	864	-1.148	-1.1118
		CUEDC1	CUEDC1	1928	865	-0.7722	-1.1112
		IGFBP4	IGFBP4	10270	866	0.3248	-1.109
		SNHG7	SNHG7	9356	867	0.1947	-1.107
		CHST12	CHST12	3482	868	-0.4148	-1.1066
		GIPR	GIPR	2646	869	-0.5702	-1.1051
		D5ERTD605E	D5ERTD605E	5773	870	-0.1654	-1.1049
		2410127L17RIK	2410127L17RIK	9381	871	0.1981	-1.1042
		TTYH3	TTYH3	2944	872	-0.512	-1.1039
		RASGRP2	RASGRP2	196	873	-2.9417	-1.1028
		TSHZ3	TSHZ3	1385	874	-1.0481	-1.1028
		CYB5R2	CYB5R2	7958	875	0.0366	-1.1026
		EHHADH	EHHADH	12244	876	1.2086	-1.1026
		ZFP280C	ZFP280C	10864	877	0.436	-1.1017
		TTC23	TTC23	4174	878	-0.3257	-1.1016
		1700020L24RIK	1700020L24RIK	2679	879	-0.5639	-1.1011
		CSDC2	CSDC2	284	880	-2.6105	-1.1006
		4732471D19RIK	4732471D19RIK	1094	881	-1.266	-1.1003
		GM17296	GM17296	5784	882	-0.1648	-1.0997
		1700003M07RIK	1700003M07RIK	1422	883	-1.0233	-1.0987
		NPW	NPW	898	884	-1.473	-1.0986
		MXRA8	MXRA8	2165	885	-0.6878	-1.0983
		IL17B	IL17B	705	886	-1.6902	-1.0983
		KCNQ1OT1	KCNQ1OT1	998	887	-1.3605	-1.0975
		CAR4	CAR4	4	888	-6.0701	-1.0971
		POU2F2	POU2F2	359	889	-2.3589	-1.097
		GSR	GSR	5014	890	-0.2373	-1.0968
		CGN	CGN	360	891	-2.3556	-1.0967
		MEX3C	MEX3C	1853	892	-0.7998	-1.0959
		GM5039	GM5039	2956	893	-0.5097	-1.0957
		TRIM63	TRIM63	1551	894	-0.9465	-1.0953
		MYH13	MYH13	9977	895	0.2772	-1.0952
		GNAO1	GNAO1	302	896	-2.5549	-1.095
		SESN3	SESN3	1738	897	-0.846	-1.0943
		ZCCHC3	ZCCHC3	2252	898	-0.6677	-1.094
		ICA1	ICA1	1332	899	-1.0904	-1.0939
		FHOD1	FHOD1	1653	900	-0.8838	-1.0937
		FAM107B	FAM107B	2305	901	-0.651	-1.0934
		NEUROG3	NEUROG3	62	902	-4.1258	-1.0921
		GSTK1	GSTK1	1383	903	-1.0486	-1.0918
		SLC24A1	SLC24A1	927	904	-1.4432	-1.0908
		6720401G13RIK	6720401G13RIK	11874	905	0.8397	-1.0905
		PRPSAP2	PRPSAP2	4360	906	-0.3046	-1.0905
		OSM	OSM	12564	907	1.9773	-1.0904
		TMEM229B	TMEM229B	11497	908	0.6339	-1.0898
		BCL2L11	BCL2L11	487	909	-2.0486	-1.0867
		GM4934	GM4934	589	910	-1.8618	-1.0864
		CLDN7	CLDN7	837	911	-1.5393	-1.0848
		ST8SIA6	ST8SIA6	11704	912	0.7335	-1.0844
		PCCB	PCCB	11300	913	0.5585	-1.0835
		CCDC85C	CCDC85C	8989	914	0.1463	-1.0826
		CACNA2D1	CACNA2D1	615	915	-1.8201	-1.0826
		HSPA4L	HSPA4L	813	916	-1.5621	-1.0821
		PPEF2	PPEF2	816	917	-1.5606	-1.0812
		ZFP619	ZFP619	1787	918	-0.8289	-1.0809
		MAGEB16-PS1	MAGEB16-PS1	9499	919	0.2134	-1.0804
		EFNA1	EFNA1	9432	920	0.2056	-1.0799
		ZFP488	ZFP488	1058	921	-1.2931	-1.0793
		SF3B3	SF3B3	1847	922	-0.8024	-1.0764
		D630023F18RIK	D630023F18RIK	904	923	-1.4686	-1.0758
		DLX3	DLX3	518	924	-1.9886	-1.0748
		PLA2G12A	PLA2G12A	1065	925	-1.2905	-1.0748
		PAM	PAM	4418	926	-0.2984	-1.0745
		TSPYL3	TSPYL3	2896	927	-0.5197	-1.0741
		ARHGAP29	ARHGAP29	753	928	-1.6368	-1.0724
		SPINK3	SPINK3	8	929	-5.6721	-1.0721
		CLDN4	CLDN4	2354	930	-0.635	-1.0713
		4933416M07RIK	4933416M07RIK	7385	931	-0.0191	-1.0712
		1700023F06RIK	1700023F06RIK	1830	932	-0.8094	-1.0709
		SH3BP5	SH3BP5	785	933	-1.5964	-1.0706
		DNMT3A	DNMT3A	416	934	-2.1947	-1.0703
		SPIRE2	SPIRE2	10355	935	0.3413	-1.0695
		PPAPDC3	PPAPDC3	3346	936	-0.4366	-1.0691
		TAF9B	TAF9B	3055	937	-0.4911	-1.0686
		PTGDS	PTGDS	546	938	-1.9199	-1.0682
		IRF1	IRF1	1985	939	-0.7493	-1.068
		KNDC1	KNDC1	413	940	-2.1977	-1.0673
		UPP1	UPP1	8761	941	0.12	-1.0668
		TMEM2	TMEM2	683	942	-1.7184	-1.0668
		CASP6	CASP6	9827	943	0.2562	-1.0653
		TTC21B	TTC21B	256	944	-2.727	-1.0651
		CRYGN	CRYGN	1707	945	-0.8593	-1.063
		ENO1,GM5506	ENO1,GM5506	2904	946	-0.5186	-1.063
		C030019I05RIK	C030019I05RIK	911	947	-1.4635	-1.0619
		TMCO7	TMCO7	2638	948	-0.5714	-1.0618
		PLVAP	PLVAP	101	949	-3.6908	-1.0616
		SH3PXD2A	SH3PXD2A	2642	950	-0.5711	-1.0613
		LRIG1	LRIG1	11725	951	0.7442	-1.0604
		CASK	CASK	11235	952	0.5393	-1.0602
		PRSS36	PRSS36	1742	953	-0.8434	-1.06
		SH3RF1	SH3RF1	8596	954	0.1036	-1.0593
		DDIT3	DDIT3	7359	955	-0.0216	-1.059
		IL11RA1	IL11RA1	835	956	-1.5428	-1.0583
		CMTM4	CMTM4	3160	957	-0.4686	-1.0573
		GJB1	GJB1	130	958	-3.442	-1.0573
		XLR5A	XLR5A	2516	959	-0.595	-1.0572
		SLC1A3	SLC1A3	1469	960	-0.997	-1.0567
		HIP1R	HIP1R	1273	961	-1.1263	-1.0565
		2410006H16RIK	2410006H16RIK	11663	962	0.7119	-1.0565
		TXNRD2	TXNRD2	6356	963	-0.1129	-1.0556
		CRB3	CRB3	470	964	-2.0838	-1.055
		NUPR1	NUPR1	11730	965	0.7473	-1.0527
		TEKT2	TEKT2	1375	966	-1.055	-1.0519
		PCDHGA11	PCDHGA11	5198	967	-0.2199	-1.0518
		GBX1	GBX1	1964	968	-0.7575	-1.0506
		USHBP1	USHBP1	11967	969	0.8929	-1.0506
		5430405H02RIK	5430405H02RIK	1605	970	-0.9152	-1.0502
		TSSK6	TSSK6	1990	971	-0.7475	-1.0492
		MIR17HG	MIR17HG	1395	972	-1.0383	-1.0483
		BLNK	BLNK	2365	973	-0.6325	-1.0472
		SAMD10	SAMD10	1782	974	-0.83	-1.047
		ADCY6	ADCY6	720	975	-1.6788	-1.0469
		SYDE2	SYDE2	5755	976	-0.1675	-1.0467
		LRP5	LRP5	4911	977	-0.2482	-1.0464
		SLC5A5	SLC5A5	184	978	-3.0211	-1.0449
		RASSF2	RASSF2	6946	979	-0.0608	-1.0437
		GABRB3	GABRB3	4041	980	-0.3395	-1.0433
		PM20D2	PM20D2	8106	981	0.0531	-1.0425
		CTSW	CTSW	1683	982	-0.8699	-1.0407
		C630043F03RIK	C630043F03RIK	1009	983	-1.344	-1.04
		S100A16	S100A16	1005	984	-1.3471	-1.0397
		GM14511	GM14511	10013	985	0.2831	-1.0395
		4921524J17RIK	4921524J17RIK	2625	986	-0.5735	-1.0373
		KCNJ10	KCNJ10	306	987	-2.5429	-1.0352
		SPIC	SPIC	12679	988	3.7998	-1.0347
		SNORA68	SNORA68	6075	989	-0.1379	-1.0346
		CASD1	CASD1	2668	990	-0.5657	-1.033
		GRK1	GRK1	1136	991	-1.2275	-1.0326
		OSBPL1A	OSBPL1A	3611	992	-0.3955	-1.0326
		GM11818	GM11818	3580	993	-0.3995	-1.0325
		ZFP90	ZFP90	2295	994	-0.6541	-1.0323
		EFNA2	EFNA2	2308	995	-0.6498	-1.0311
		B430010I23RIK	B430010I23RIK	2666	996	-0.5659	-1.0307
		AIFM3	AIFM3	540	997	-1.9352	-1.0301
		TSKU	TSKU	1146	998	-1.2201	-1.0299
		PEG3	PEG3	596	999	-1.8456	-1.0285
		NOTCH2	NOTCH2	2341	1000	-0.6392	-1.0284
		PCDHGB8	PCDHGB8	1682	1001	-0.8701	-1.0275
		GREB1L	GREB1L	386	1002	-2.2859	-1.0269
		TBXA2R	TBXA2R	988	1003	-1.3671	-1.0268
		MYH14	MYH14	1253	1004	-1.138	-1.0268
		DHPS	DHPS	1744	1005	-0.8427	-1.0266
		3110021N24RIK	3110021N24RIK	4319	1006	-0.3092	-1.0263
		PAK6	PAK6	450	1007	-2.1286	-1.0234
		F2	F2	10150	1008	0.3042	-1.0231
		IFNGR1	IFNGR1	4214	1009	-0.3214	-1.0228
		MYO1D	MYO1D	1117	1010	-1.2471	-1.0224
		SARS	SARS	2418	1011	-0.6183	-1.0219
		FNTA	FNTA	6183	1012	-0.1276	-1.0208
		HES6	HES6	1096	1013	-1.2656	-1.0206
		MIR3064	MIR3064	3554	1014	-0.403	-1.0206
		2310039L15RIK	2310039L15RIK	2273	1015	-0.6607	-1.0199
		NAA16	NAA16	2687	1016	-0.5614	-1.0198
		FOXP1	FOXP1	19	1017	-5.1841	-1.0198
		BC026585	BC026585	4999	1018	-0.2394	-1.019
		HIPK3	HIPK3	6612	1019	-0.0891	-1.019
		LCAT	LCAT	946	1020	-1.4145	-1.0178
		GATA1	GATA1	3114	1021	-0.478	-1.0177
		WASF3	WASF3	4967	1022	-0.2426	-1.0177
		NEK3	NEK3	9902	1023	0.2672	-1.0176
		SORT1	SORT1	339	1024	-2.4304	-1.0174
		RBMS1	RBMS1	11962	1025	0.8904	-1.0172
		PIR	PIR	2048	1026	-0.7299	-1.0171
		GNMT	GNMT	1763	1027	-0.8346	-1.017
		ADAP1	ADAP1	7404	1028	-0.0172	-1.0168
		GIPC2	GIPC2	1343	1029	-1.081	-1.0168
		AW555464	AW555464	2317	1030	-0.6457	-1.0165
		TEX11	TEX11	437	1031	-2.1538	-1.0151
		GM5077	GM5077	10243	1032	0.3208	-1.0151
		RAB31	RAB31	1206	1033	-1.1714	-1.0151
		CSDA	CSDA	6773	1034	-0.0756	-1.0147
		ZNRF1	ZNRF1	2441	1035	-0.6133	-1.0134
		PALM	PALM	3155	1036	-0.4697	-1.013
		BOK	BOK	3033	1037	-0.495	-1.0126
		RASA2	RASA2	2372	1038	-0.6303	-1.0117
		1810019J16RIK	1810019J16RIK	6889	1039	-0.0645	-1.011
		UBXN8	UBXN8	5532	1040	-0.1892	-1.0101
		HSPA2	HSPA2	10168	1041	0.3075	-1.01
		ZSWIM5	ZSWIM5	3461	1042	-0.4178	-1.0099
		PKDCC	PKDCC	379	1043	-2.3076	-1.0082
		EPCAM	EPCAM	2028	1044	-0.735	-1.0074
		PSD	PSD	902	1045	-1.4709	-1.0072
		MSRB2	MSRB2	9543	1046	0.2191	-1.0071
		TRIM13	TRIM13	4275	1047	-0.3153	-1.0068
		MAPK12	MAPK12	343	1048	-2.4153	-1.0065
		BST2	BST2	950	1049	-1.4134	-1.0063
		RIMS3	RIMS3	1101	1050	-1.257	-1.0058
		UBE2J1	UBE2J1	2349	1051	-0.6368	-1.0054
		NCF2	NCF2	12105	1052	1.0382	-1.0034
		ARHGEF3	ARHGEF3	1507	1053	-0.9714	-1.0034
		HFE2	HFE2	438	1054	-2.1511	-1.0033
		ALDH9A1	ALDH9A1	1642	1055	-0.8918	-1.0016
		SLC38A2	SLC38A2	1698	1056	-0.8643	-1.0013
		ANO8	ANO8	1778	1057	-0.8306	-1.001
		IDUA	IDUA	5548	1058	-0.1878	-1.0002
		ESRP2	ESRP2	2777	1059	-0.5422	-0.9986
		CD74	CD74	8025	1060	0.0442	-0.9977
		IRAK2	IRAK2	11556	1061	0.6579	-0.9977
		ATXN10	ATXN10	1696	1062	-0.8645	-0.9964
		4930524L23RIK	4930524L23RIK	981	1063	-1.3788	-0.9956
		MBD3	MBD3	4070	1064	-0.3368	-0.9954
		KLHL2	KLHL2	7296	1065	-0.027	-0.9949
		SNORA28	SNORA28	3874	1066	-0.36	-0.9948
		ANXA2	ANXA2	1540	1067	-0.9548	-0.9939
		UBR5	UBR5	3084	1068	-0.4832	-0.9922
		DDHD2	DDHD2	5032	1069	-0.2359	-0.9911
		ADAD2	ADAD2	931	1070	-1.4404	-0.9905
		TESK2	TESK2	5073	1071	-0.2321	-0.9904
		STAMBPL1	STAMBPL1	1536	1072	-0.9567	-0.9903
		FAM171A1	FAM171A1	2337	1073	-0.6401	-0.9897
		FAM111A	FAM111A	6614	1074	-0.089	-0.9896
		XLR3A	XLR3A	11915	1075	0.8667	-0.9893
		2410007B07RIK	2410007B07RIK	1603	1076	-0.9165	-0.9874
		CACYBP	CACYBP	2435	1077	-0.6143	-0.987
		FAM75D3	FAM75D3	1099	1078	-1.261	-0.987
		TUBA3A	TUBA3A	10671	1079	0.3972	-0.9857
		LPAR6	LPAR6	4187	1080	-0.3243	-0.9854
		SCAMP1	SCAMP1	2183	1081	-0.6841	-0.9845
		FBXO17	FBXO17	1891	1082	-0.7846	-0.9829
		SOCS3	SOCS3	4704	1083	-0.2706	-0.9824
		SNHG12	SNHG12	5829	1084	-0.1609	-0.9818
		KLHL36	KLHL36	1442	1085	-1.0131	-0.9816
		OPTN	OPTN	6364	1086	-0.1116	-0.9808
		SP4	SP4	3057	1087	-0.4907	-0.9806
		UBE2E2	UBE2E2	8883	1088	0.1337	-0.9801
		TRPV2	TRPV2	531	1089	-1.9541	-0.979
		EPHB4	EPHB4	6430	1090	-0.1052	-0.9778
		4930486L24RIK	4930486L24RIK	1589	1091	-0.9255	-0.9777
		MAFF	MAFF	1269	1092	-1.1284	-0.9776
		MARK1	MARK1	6854	1093	-0.0677	-0.9773
		IFI35	IFI35	4504	1094	-0.2885	-0.9766
		CXX1B	CXX1B	8986	1095	0.146	-0.9761
		ACTN2	ACTN2	1648	1096	-0.8869	-0.9754
		RAP1GDS1	RAP1GDS1	2016	1097	-0.7383	-0.9744
		AP1S3	AP1S3	1102	1098	-1.2567	-0.974
		MYCN	MYCN	1732	1099	-0.8493	-0.9731
		SNHG4	SNHG4	7604	1100	0.0036	-0.973
		CXX1A	CXX1A	9604	1101	0.2272	-0.9727
		SNORA62	SNORA62	3004	1102	-0.5005	-0.9723
		ASPHD1	ASPHD1	154	1103	-3.2646	-0.9719
		DIAP1	DIAP1	1935	1104	-0.7703	-0.9708
		SNORD35B	SNORD35B	7226	1105	-0.0327	-0.9703
		RRAGD	RRAGD	2551	1106	-0.5874	-0.9701
		RADIL	RADIL	9588	1107	0.2253	-0.9696
		AOAH	AOAH	797	1108	-1.5838	-0.9695
		MFAP2	MFAP2	163	1109	-3.2168	-0.9694
		PRKAR2B	PRKAR2B	477	1110	-2.0694	-0.9693
		VMN2R55	VMN2R55	1095	1111	-1.2658	-0.9691
		FZD8	FZD8	11645	1112	0.7058	-0.9691
		RGS9	RGS9	5883	1113	-0.1566	-0.9688
		DPF1	DPF1	1814	1114	-0.8167	-0.9684
		PIK3IP1	PIK3IP1	2989	1115	-0.5035	-0.9679
		UBTD2	UBTD2	3130	1116	-0.4749	-0.9673
		SNORA31	SNORA31	963	1117	-1.4032	-0.9671
		DSP	DSP	8927	1118	0.1395	-0.9666
		DOCK9	DOCK9	2515	1119	-0.5952	-0.9665
		1110002L01RIK	1110002L01RIK	1083	1120	-1.2754	-0.9663
		BCOR	BCOR	2688	1121	-0.5612	-0.9652
		MBTPS2	MBTPS2	7494	1122	-0.0081	-0.9652
		ZNFX1	ZNFX1	2051	1123	-0.7288	-0.9646
		U05342,ZFP91	U05342,ZFP91	4480	1124	-0.2909	-0.9644
		PFKFB3	PFKFB3	2689	1125	-0.5611	-0.9632
		4932411L15	4932411L15	1265	1126	-1.1325	-0.9631
		CELA1	CELA1	9096	1127	0.1604	-0.9631
		GGT6	GGT6	4497	1128	-0.2892	-0.9628
		SH3GL2	SH3GL2	12174	1129	1.0983	-0.9618
		2610019E17RIK	2610019E17RIK	6581	1130	-0.0921	-0.9607
		PDE7A	PDE7A	3437	1131	-0.4215	-0.9605
		MMP28	MMP28	7251	1132	-0.0311	-0.9604
		UACA	UACA	3087	1133	-0.4823	-0.9599
		GNAI1	GNAI1	10693	1134	0.4005	-0.9587
		AIM2	AIM2	6958	1135	-0.0598	-0.9583
		CLMN	CLMN	5160	1136	-0.2246	-0.9582
		FGFR2	FGFR2	38	1137	-4.5429	-0.9576
		EOMES	EOMES	9748	1138	0.2461	-0.9562
		DDX25	DDX25	600	1139	-1.8361	-0.9556
		UCK2	UCK2	8097	1140	0.0523	-0.9552
		GYG	GYG	1444	1141	-1.0108	-0.9548
		BACE1	BACE1	1126	1142	-1.2347	-0.9547
		CACNA1B	CACNA1B	51	1143	-4.3051	-0.9547
		OSBPL3	OSBPL3	3911	1144	-0.3564	-0.9541
		2410004N09RIK	2410004N09RIK	9634	1145	0.2307	-0.9529
		CDKN2AIP	CDKN2AIP	2347	1146	-0.6375	-0.9528
		PVRL4	PVRL4	741	1147	-1.6486	-0.9527
		2810047C21RIK1	2810047C21RIK1	11192	1148	0.5282	-0.9517
		FNDC5	FNDC5	206	1149	-2.9218	-0.9516
		C330008G21RIK	C330008G21RIK	808	1150	-1.5654	-0.9515
		RECK	RECK	8806	1151	0.1247	-0.9513
		SMTNL2	SMTNL2	11782	1152	0.7785	-0.9509
		GPX8	GPX8	4045	1153	-0.3392	-0.9504
		NES	NES	11690	1154	0.7254	-0.9504
		MIR3096B	MIR3096B	12239	1155	1.1997	-0.9499
		ITPRIPL1	ITPRIPL1	2616	1156	-0.5763	-0.9497
		D7ERTD715E	D7ERTD715E	2650	1157	-0.5692	-0.9471
		FGD1	FGD1	2986	1158	-0.5036	-0.9461
		ATXN1L	ATXN1L	1282	1159	-1.1197	-0.9456
		SCMH1	SCMH1	1904	1160	-0.7816	-0.9454
		ZFP629	ZFP629	665	1161	-1.7511	-0.9448
		KCTD3	KCTD3	1420	1162	-1.0237	-0.9448
		2010320M18RIK	2010320M18RIK	1724	1163	-0.853	-0.9432
		2810429I04RIK	2810429I04RIK	2214	1164	-0.6763	-0.943
		C330022C24RIK	C330022C24RIK	1000	1165	-1.3577	-0.9418
		CUL4B	CUL4B	11062	1166	0.4846	-0.9417
		VIL1	VIL1	3180	1167	-0.4653	-0.9413
		GRK4	GRK4	1124	1168	-1.2372	-0.9411
		FNDC4	FNDC4	606	1169	-1.8264	-0.9403
		CRIP1	CRIP1	1523	1170	-0.9637	-0.9393
		TUBB4A	TUBB4A	229	1171	-2.8345	-0.9373
		NOTCH4	NOTCH4	10003	1172	0.2813	-0.9372
		STAT4	STAT4	727	1173	-1.6707	-0.9366
		KLK11	KLK11	5357	1174	-0.2042	-0.9364
		GRHL2	GRHL2	212	1175	-2.9034	-0.9363
		RAB11FIP1	RAB11FIP1	8337	1176	0.0749	-0.9352
		CHML	CHML	8920	1177	0.1383	-0.935
		BAG3	BAG3	11294	1178	0.5561	-0.9349
		MLF1	MLF1	885	1179	-1.4875	-0.9344
		GPSM2	GPSM2	4410	1180	-0.2992	-0.9311
		STXBP5	STXBP5	10499	1181	0.3666	-0.9311
		GPD2	GPD2	2868	1182	-0.5248	-0.9304
		SNHG1	SNHG1	4454	1183	-0.2941	-0.9302
		COL6A4	COL6A4	56	1184	-4.2242	-0.9298
		LARP1	LARP1	2619	1185	-0.575	-0.9294
		IDE	IDE	2511	1186	-0.5962	-0.9289
		XLR3B	XLR3B	11898	1187	0.8568	-0.9288
		GNG8	GNG8	624	1188	-1.8071	-0.9283
		GPR124	GPR124	10828	1189	0.4283	-0.9274
		MIOS	MIOS	2149	1190	-0.6911	-0.927
		SPIRE1	SPIRE1	3748	1191	-0.3764	-0.9267
		FAT1	FAT1	1896	1192	-0.7834	-0.9265
		CLCN4-2	CLCN4-2	8228	1193	0.0646	-0.925
		PTGIS	PTGIS	895	1194	-1.4762	-0.925
		DMXL2	DMXL2	3438	1195	-0.4213	-0.9246
		RASGEF1A	RASGEF1A	12415	1196	1.5061	-0.9242
		DUSP3	DUSP3	1139	1197	-1.225	-0.9238
		SNRPN	SNRPN	1050	1198	-1.2973	-0.9237
		SLC12A4	SLC12A4	1203	1199	-1.1726	-0.9233
		ARID2	ARID2	1785	1200	-0.8291	-0.9229
		ADSSL1	ADSSL1	10607	1201	0.3851	-0.9227
		NR1D1	NR1D1	2870	1202	-0.5247	-0.9225
		CAPN2	CAPN2	321	1203	-2.4909	-0.9222
		1810029B16RIK	1810029B16RIK	2251	1204	-0.6678	-0.9211
		HGSNAT	HGSNAT	11588	1205	0.6759	-0.9211
		A130077B15RIK	A130077B15RIK	1255	1206	-1.1369	-0.9188
		HIST1H1A	HIST1H1A	2450	1207	-0.6104	-0.9186
		PARP16	PARP16	3563	1208	-0.4016	-0.9177
		CNN2	CNN2	768	1209	-1.6173	-0.9162
		SBSN	SBSN	784	1210	-1.5969	-0.916
		SCARF1	SCARF1	3081	1211	-0.4842	-0.9155
		LRRC27	LRRC27	581	1212	-1.8671	-0.9138
		MPP6	MPP6	10937	1213	0.4568	-0.9136
		ATF5	ATF5	9534	1214	0.218	-0.9136
		DEPDC1A	DEPDC1A	3830	1215	-0.3654	-0.9132
		ZCCHC18	ZCCHC18	459	1216	-2.1065	-0.9124
		HNF1A	HNF1A	6240	1217	-0.1228	-0.9123
		SHB	SHB	1447	1218	-1.0102	-0.912
		PRKAA2	PRKAA2	11364	1219	0.5799	-0.9116
		CHAC1	CHAC1	11673	1220	0.7162	-0.9112
		CEND1	CEND1	58	1221	-4.154	-0.9111
		SNORA65	SNORA65	9957	1222	0.2746	-0.9111
		MOCOS	MOCOS	555	1223	-1.9007	-0.9105
		CLCA4	CLCA4	779	1224	-1.6024	-0.9103
		MGEA5	MGEA5	7471	1225	-0.0103	-0.9095
		RPL22L1	RPL22L1	8872	1226	0.1321	-0.9091
		THSD1	THSD1	765	1227	-1.6211	-0.909
		2400009B08RIK	2400009B08RIK	2355	1228	-0.6348	-0.9088
		TAF5L	TAF5L	2379	1229	-0.6286	-0.9086
		DOCK5	DOCK5	3764	1230	-0.3744	-0.9076
		CC2D2A	CC2D2A	9670	1231	0.2362	-0.9072
		RABGGTB	RABGGTB	3234	1232	-0.4539	-0.9071
		TCF25	TCF25	5017	1233	-0.2372	-0.9065
		GRAMD2	GRAMD2	11204	1234	0.5301	-0.9062
		TUG1	TUG1	4981	1235	-0.241	-0.9057
		STX1A	STX1A	2184	1236	-0.6836	-0.9055
		RIMKLA	RIMKLA	174	1237	-3.1125	-0.9048
		GM10785	GM10785	5092	1238	-0.2308	-0.9039
		PIF1	PIF1	8847	1239	0.1295	-0.9036
		ZFP428	ZFP428	4432	1240	-0.2967	-0.9036
		RHOX5	RHOX5	759	1241	-1.6279	-0.9034
		TMCO4	TMCO4	5310	1242	-0.2089	-0.9032
		JRKL	JRKL	8241	1243	0.0655	-0.903
		MOGAT2	MOGAT2	12612	1244	2.294	-0.9015
		PCDHGB7	PCDHGB7	2314	1245	-0.6474	-0.8995
		GKAP1	GKAP1	9999	1246	0.2809	-0.8992
		SLFN9	SLFN9	2003	1247	-0.7423	-0.8992
		STAP2	STAP2	1632	1248	-0.8982	-0.8988
		NRBP2	NRBP2	926	1249	-1.4447	-0.8983
		5031425E22RIK	5031425E22RIK	4874	1250	-0.2508	-0.898
		VCAN	VCAN	5614	1251	-0.1802	-0.8961
		CECR2	CECR2	3620	1252	-0.394	-0.896
		TRIM12C	TRIM12C	9152	1253	0.1676	-0.8951
		ATP8A1	ATP8A1	10381	1254	0.3449	-0.8949
		ZSWIM1	ZSWIM1	3919	1255	-0.3546	-0.8938
		CBLC	CBLC	6992	1256	-0.0566	-0.8928
		HUS1B	HUS1B	863	1257	-1.5144	-0.892
		GNG2	GNG2	11783	1258	0.7786	-0.8917
		1700120C14RIK	1700120C14RIK	2146	1259	-0.6915	-0.8917
		RAB39	RAB39	11910	1260	0.8616	-0.8913
		ARRB1	ARRB1	747	1261	-1.6432	-0.8909
		2310022B05RIK	2310022B05RIK	2627	1262	-0.5732	-0.8904
		GDAP10	GDAP10	6331	1263	-0.1145	-0.8895
		OLFR613	OLFR613	1337	1264	-1.0874	-0.8892
		RASIP1	RASIP1	1262	1265	-1.1335	-0.8891
		ARHGAP4	ARHGAP4	11419	1266	0.6045	-0.8886
		DPYSL3	DPYSL3	400	1267	-2.2287	-0.8877
		RHOU	RHOU	3590	1268	-0.3985	-0.887
		GYLTL1B	GYLTL1B	3473	1269	-0.4157	-0.8867
		STK17B	STK17B	815	1270	-1.561	-0.8866
		A630089N07RIK	A630089N07RIK	1288	1271	-1.1178	-0.8863
		HDDC2	HDDC2	8147	1272	0.0567	-0.8861
		TAS1R1	TAS1R1	524	1273	-1.9654	-0.8855
		PTK2B	PTK2B	1129	1274	-1.2302	-0.8853
		3830408C21RIK	3830408C21RIK	798	1275	-1.5819	-0.8852
		C80913	C80913	1950	1276	-0.7653	-0.8833
		AKT1	AKT1	2463	1277	-0.6075	-0.8832
		ARMC6	ARMC6	1397	1278	-1.0375	-0.8829
		DACT1	DACT1	983	1279	-1.3749	-0.8828
		TRIB3	TRIB3	9809	1280	0.2543	-0.8825
		MTA1	MTA1	2879	1281	-0.5234	-0.8825
		GM11744	GM11744	604	1282	-1.834	-0.8818
		STAU2	STAU2	3204	1283	-0.46	-0.8816
		SNORA70	SNORA70	11267	1284	0.5469	-0.8816
		PRKCE	PRKCE	712	1285	-1.6831	-0.8815
		RAC3	RAC3	1598	1286	-0.9176	-0.8808
		AKAP17B	AKAP17B	9339	1287	0.1933	-0.8805
		REC8	REC8	10214	1288	0.3151	-0.8802
		USP53	USP53	3345	1289	-0.4367	-0.8794
		TMEM55A	TMEM55A	6501	1290	-0.0987	-0.8791
		IFFO2	IFFO2	1392	1291	-1.0427	-0.8789
		GSTA4	GSTA4	4199	1292	-0.3231	-0.8788
		HIST3H2A	HIST3H2A	974	1293	-1.3831	-0.8786
		PRRC1	PRRC1	12424	1294	1.5229	-0.8783
		NIN	NIN	8392	1295	0.0808	-0.8782
		MMD	MMD	10525	1296	0.3707	-0.878
		FBXW17	FBXW17	905	1297	-1.467	-0.8779
		RAB3GAP2	RAB3GAP2	1116	1298	-1.2474	-0.8778
		PLIN2	PLIN2	11952	1299	0.8836	-0.8769
		GALNT12	GALNT12	12221	1300	1.1637	-0.8767
		SNORA74A	SNORA74A	1871	1301	-0.7918	-0.8765
		GADD45G	GADD45G	296	1302	-2.5735	-0.8763
		CTPS2	CTPS2	4781	1303	-0.2617	-0.8761
		C130039O16RIK	C130039O16RIK	3284	1304	-0.4459	-0.876
		NAV2	NAV2	180	1305	-3.0856	-0.876
		FAM125B	FAM125B	12143	1306	1.0684	-0.8753
		VIM	VIM	10024	1307	0.2842	-0.8751
		PGRMC1	PGRMC1	6820	1308	-0.0711	-0.8746
		NCOR2	NCOR2	2376	1309	-0.6288	-0.8745
		ANKRD27	ANKRD27	5836	1310	-0.1606	-0.8745
		DNMT3L	DNMT3L	520	1311	-1.9842	-0.8736
		ARMCX1	ARMCX1	8192	1312	0.0608	-0.8727
		SPN	SPN	59	1313	-4.1517	-0.8727
		SLC6A9	SLC6A9	9971	1314	0.2763	-0.8724
		NHS	NHS	96	1315	-3.7804	-0.8722
		PLEK2	PLEK2	4834	1316	-0.2572	-0.872
		PACS1	PACS1	1634	1317	-0.8978	-0.872
		PAQR7	PAQR7	2984	1318	-0.5039	-0.8718
		TOMM20	TOMM20	4689	1319	-0.2719	-0.8718
		CERK	CERK	1020	1320	-1.3308	-0.8717
		EIF2C1	EIF2C1	10808	1321	0.422	-0.8708
		CEP76	CEP76	1919	1322	-0.7771	-0.8707
		TAF1B	TAF1B	7483	1323	-0.0093	-0.8703
		PSORS1C2	PSORS1C2	994	1324	-1.3623	-0.8698
		FOXO1	FOXO1	1043	1325	-1.3062	-0.8697
		SNORA23	SNORA23	3125	1326	-0.4756	-0.8696
		TMEM63A	TMEM63A	3404	1327	-0.4267	-0.8693
		SLC16A10	SLC16A10	1373	1328	-1.0559	-0.8692
		H19	H19	36	1329	-4.5976	-0.8687
		ZFP1	ZFP1	1289	1330	-1.1173	-0.8687
		SLCO4C1	SLCO4C1	9509	1331	0.2153	-0.8687
		MTAP2	MTAP2	2100	1332	-0.7105	-0.8685
		TPD52	TPD52	9587	1333	0.2253	-0.8684
		ARHGAP30	ARHGAP30	8256	1334	0.0675	-0.8676
		CD34	CD34	267	1335	-2.674	-0.8675
		SLC2A1	SLC2A1	3784	1336	-0.372	-0.8671
		ZFYVE9	ZFYVE9	4027	1337	-0.3409	-0.8668
		TBL1X	TBL1X	11185	1338	0.5269	-0.8666
		CRABP2	CRABP2	74	1339	-3.8966	-0.8665
		KCNK5	KCNK5	2630	1340	-0.573	-0.866
		INF2	INF2	1564	1341	-0.941	-0.8658
		FV1	FV1	2915	1342	-0.5166	-0.8657
		SH2D3C	SH2D3C	2659	1343	-0.5663	-0.8653
		TMEM145	TMEM145	195	1344	-2.9582	-0.8652
		NEAT1	NEAT1	4081	1345	-0.3358	-0.8652
		ADCY9	ADCY9	10145	1346	0.3035	-0.8648
		PRRG4	PRRG4	707	1347	-1.6899	-0.8636
		HOMER3	HOMER3	4699	1348	-0.2713	-0.8635
		XLR4A	XLR4A	12470	1349	1.615	-0.8631
		PDHA1	PDHA1	7723	1350	0.0146	-0.8618
		AW551984	AW551984	602	1351	-1.8349	-0.8612
		AA388235	AA388235	344	1352	-2.4066	-0.8604
		SNORD33	SNORD33	1296	1353	-1.1149	-0.8603
		HECTD2	HECTD2	2113	1354	-0.7066	-0.8603
		AFAP1L1	AFAP1L1	5932	1355	-0.1515	-0.8601
		PARK2	PARK2	422	1356	-2.1883	-0.8601
		WFDC2	WFDC2	4815	1357	-0.2586	-0.8597
		DOCK7	DOCK7	10991	1358	0.4672	-0.8579
		GM17821	GM17821	1179	1359	-1.194	-0.8575
		BEND4	BEND4	7093	1360	-0.0473	-0.8572
		PPL	PPL	677	1361	-1.7306	-0.8571
		PBX1	PBX1	1604	1362	-0.9154	-0.8566
		IL17RD	IL17RD	1998	1363	-0.7448	-0.8554
		AI506816	AI506816	1646	1364	-0.8873	-0.855
		IFITM3	IFITM3	3637	1365	-0.3928	-0.8545
		RHPN2	RHPN2	10660	1366	0.3954	-0.8543
		NR2F6	NR2F6	1135	1367	-1.2284	-0.8541
		AP1M2	AP1M2	912	1368	-1.4626	-0.8533
		BC057079	BC057079	1827	1369	-0.8104	-0.852
		HDX	HDX	1870	1370	-0.7933	-0.8519
		FAM159A	FAM159A	1982	1371	-0.75	-0.8516
		MATN3	MATN3	1685	1372	-0.8697	-0.8514
		TPCN2	TPCN2	8000	1373	0.0414	-0.8514
		COL2A1	COL2A1	12479	1374	1.6324	-0.851
		PHLPP2	PHLPP2	4532	1375	-0.2866	-0.8508
		RFXAP	RFXAP	9992	1376	0.2795	-0.8507
		C1RL	C1RL	12156	1377	1.0849	-0.8505
		MT1	MT1	2532	1378	-0.5908	-0.8504
		EMP3	EMP3	7814	1379	0.0226	-0.8484
		FAM117A	FAM117A	5112	1380	-0.2293	-0.8483
		GTPBP6	GTPBP6	2942	1381	-0.5124	-0.8482
		RBPMS	RBPMS	2304	1382	-0.6518	-0.8479
		CD47	CD47	3377	1383	-0.432	-0.8475
		SERPINA3M	SERPINA3M	7097	1384	-0.0472	-0.8474
		PPP4R1	PPP4R1	3488	1385	-0.4139	-0.8464
		ELAVL3	ELAVL3	150	1386	-3.2788	-0.8463
		ZFP319	ZFP319	2987	1387	-0.5036	-0.8462
		SYN1	SYN1	7623	1388	0.0054	-0.8459
		LY6G6E	LY6G6E	12245	1389	1.2087	-0.8456
		AGBL5	AGBL5	2948	1390	-0.5111	-0.8455
		TMEM41A	TMEM41A	4101	1391	-0.3338	-0.8449
		ATP10D	ATP10D	7970	1392	0.0381	-0.8421
		TEKT1	TEKT1	11642	1393	0.7027	-0.8415
		KCNB1	KCNB1	977	1394	-1.3809	-0.8411
		MBNL3	MBNL3	1007	1395	-1.3449	-0.841
		DDX26B	DDX26B	12039	1396	0.9633	-0.8405
		BC021767	BC021767	519	1397	-1.9871	-0.8397
		MDK	MDK	6513	1398	-0.0976	-0.8396
		GMDS	GMDS	1949	1399	-0.7655	-0.8395
		FXYD5	FXYD5	11657	1400	0.7092	-0.8388
		SAMD1	SAMD1	6618	1401	-0.0888	-0.8388
		8030442B05RIK	8030442B05RIK	2685	1402	-0.5625	-0.8386
		2610002J02RIK	2610002J02RIK	2655	1403	-0.5674	-0.8384
		MAST3	MAST3	8830	1404	0.1272	-0.8378
		4930548H24RIK	4930548H24RIK	1914	1405	-0.7784	-0.8376
		ACER1	ACER1	985	1406	-1.3734	-0.8368
		PHF19	PHF19	147	1407	-3.3075	-0.8355
		ARMCX4	ARMCX4	3197	1408	-0.4618	-0.834
		NDN	NDN	4572	1409	-0.2825	-0.8329
		MED14	MED14	1563	1410	-0.942	-0.8328
		ST3GAL2	ST3GAL2	8031	1411	0.045	-0.8327
		SMCHD1	SMCHD1	2999	1412	-0.5015	-0.8326
		GM15421	GM15421	9333	1413	0.1924	-0.8318
		NFE2L3	NFE2L3	12226	1414	1.1779	-0.8315
		CEP120	CEP120	3579	1415	-0.3996	-0.8314
		AI316807	AI316807	8376	1416	0.0791	-0.8304
		ZFP652	ZFP652	1872	1417	-0.791	-0.8295
		SSH1	SSH1	10959	1418	0.4615	-0.8295
		PECR	PECR	6911	1419	-0.0634	-0.829
		OTUB2	OTUB2	1159	1420	-1.2082	-0.8287
		3110057O12RIK	3110057O12RIK	1967	1421	-0.7569	-0.8282
		EVL	EVL	7720	1422	0.0146	-0.8279
		PNMAL2	PNMAL2	2243	1423	-0.6704	-0.8278
		PDE1B	PDE1B	1833	1424	-0.8081	-0.8277
		FBLIM1	FBLIM1	1939	1425	-0.7688	-0.827
		TESK1	TESK1	2340	1426	-0.6396	-0.8268
		TRIO	TRIO	2334	1427	-0.6406	-0.8258
		ABCA2	ABCA2	2843	1428	-0.5287	-0.8257
		SLC35A3	SLC35A3	7294	1429	-0.0271	-0.8256
		PROM1	PROM1	11538	1430	0.6526	-0.8246
		PSTPIP2	PSTPIP2	1693	1431	-0.8656	-0.8238
		GM16062	GM16062	1594	1432	-0.9219	-0.8232
		HNRNPH1	HNRNPH1	1377	1433	-1.0537	-0.8227
		SNHG6	SNHG6	10964	1434	0.4624	-0.822
		GM2027	GM2027	2081	1435	-0.7203	-0.8218
		SCOC	SCOC	3153	1436	-0.4699	-0.8217
		MSL3L2	MSL3L2	1691	1437	-0.866	-0.8211
		ING2	ING2	3815	1438	-0.3679	-0.8201
		H2-DMB1	H2-DMB1	12354	1439	1.3687	-0.8197
		GM10033	GM10033	8117	1440	0.0542	-0.8185
		PLA2G5	PLA2G5	1765	1441	-0.8337	-0.8177
		GM6792	GM6792	12510	1442	1.761	-0.8172
		CASP2	CASP2	3326	1443	-0.4389	-0.8171
		CRISP1	CRISP1	10753	1444	0.4108	-0.8166
		FGD4	FGD4	9036	1445	0.1514	-0.8159
		CLIP3	CLIP3	585	1446	-1.8636	-0.8153
		UPK3B	UPK3B	824	1447	-1.5527	-0.8151
		LRFN3	LRFN3	3133	1448	-0.4748	-0.8139
		DEFB42	DEFB42	11345	1449	0.5725	-0.8136
		GAL3ST3	GAL3ST3	1160	1450	-1.2082	-0.8132
		SAMHD1	SAMHD1	3858	1451	-0.3618	-0.8128
		1110002N22RIK	1110002N22RIK	3316	1452	-0.4403	-0.8121
		SGCE	SGCE	508	1453	-2.0144	-0.8117
		4930556M19RIK	4930556M19RIK	1735	1454	-0.8475	-0.8115
		CDCA7L	CDCA7L	2213	1455	-0.6768	-0.8111
		5033414D02RIK	5033414D02RIK	2246	1456	-0.6697	-0.8102
		PLEKHA4	PLEKHA4	1017	1457	-1.335	-0.8098
		MAP3K9	MAP3K9	1832	1458	-0.8083	-0.8093
		SEH1L	SEH1L	5703	1459	-0.1726	-0.8091
		CHD9	CHD9	551	1460	-1.9103	-0.8089
		SLC50A1	SLC50A1	12161	1461	1.087	-0.8087
		2010001M06RIK	2010001M06RIK	1561	1462	-0.9436	-0.8087
		NINJ1	NINJ1	10921	1463	0.4516	-0.8085
		MIR682	MIR682	5685	1464	-0.174	-0.8078
		ACOT7	ACOT7	4536	1465	-0.2863	-0.8078
		VAMP3	VAMP3	4621	1466	-0.2787	-0.8071
		EEF1A2	EEF1A2	71	1467	-3.9626	-0.807
		PLCG2	PLCG2	373	1468	-2.326	-0.8067
		THBS3	THBS3	436	1469	-2.1551	-0.8064
		2010107H07RIK	2010107H07RIK	1495	1470	-0.9801	-0.8063
		2810004N23RIK	2810004N23RIK	4161	1471	-0.3269	-0.8059
		WDR20B	WDR20B	5633	1472	-0.1782	-0.8057
		SNORD87	SNORD87	12310	1473	1.2986	-0.805
		GPSM1	GPSM1	2534	1474	-0.5906	-0.805
		CHRNA7	CHRNA7	771	1475	-1.6106	-0.8048
		KDM4C	KDM4C	1455	1476	-1.0058	-0.8043
		ACSL1	ACSL1	6555	1477	-0.0943	-0.8039
		GUSB	GUSB	8530	1478	0.0958	-0.8037
		DEK	DEK	2454	1479	-0.6094	-0.8028
		ZFHX3	ZFHX3	1534	1480	-0.9578	-0.8028
		KBTBD7	KBTBD7	1305	1481	-1.1101	-0.8027
		SRCRB4D	SRCRB4D	2507	1482	-0.5968	-0.8017
		ITPR2	ITPR2	102	1483	-3.6765	-0.8012
		TXNRD1	TXNRD1	1812	1484	-0.8174	-0.8011
		ZFP28	ZFP28	7571	1485	0.0001	-0.8009
		ATXN7L2	ATXN7L2	1210	1486	-1.1686	-0.8003
		SHROOM2	SHROOM2	5559	1487	-0.1864	-0.8002
		LARP1B	LARP1B	1768	1488	-0.8325	-0.8
		MYO5C	MYO5C	9952	1489	0.2735	-0.7999
		4930549G23RIK	4930549G23RIK	6006	1490	-0.1431	-0.7995
		ENOX1	ENOX1	1	1491	-6.6465	-0.7988
		NDST1	NDST1	8218	1492	0.0631	-0.7986
		SEMA6B	SEMA6B	1078	1493	-1.2797	-0.7973
		FAM49A	FAM49A	1166	1494	-1.2006	-0.7971
		PARP12	PARP12	347	1495	-2.3979	-0.7971
		RAB3IP	RAB3IP	2231	1496	-0.6732	-0.7969
		CTRL	CTRL	740	1497	-1.6505	-0.7968
		PTP4A3	PTP4A3	1374	1498	-1.0551	-0.7967
		TMTC1	TMTC1	1909	1499	-0.7794	-0.7966
		SEC24D	SEC24D	2425	1500	-0.6167	-0.7962
		MAPRE2	MAPRE2	2180	1501	-0.6847	-0.7957
		USP10	USP10	3276	1502	-0.4465	-0.7956
		IMMP2L	IMMP2L	11658	1503	0.7102	-0.7953
		1190002N15RIK	1190002N15RIK	5805	1504	-0.163	-0.7949
		SNHG3	SNHG3	9203	1505	0.1753	-0.7948
		MYBPC2	MYBPC2	234	1506	-2.8177	-0.7939
		THRA	THRA	9198	1507	0.1745	-0.7935
		ISOC1	ISOC1	6876	1508	-0.066	-0.7934
		MINA	MINA	1515	1509	-0.9686	-0.7925
		GAB1	GAB1	1995	1510	-0.7459	-0.7923
		6330409N04RIK	6330409N04RIK	4869	1511	-0.252	-0.7921
		UNC5CL	UNC5CL	9230	1512	0.1793	-0.7918
		OTUD4	OTUD4	2731	1513	-0.5526	-0.7915
		PPFIA4	PPFIA4	2520	1514	-0.5944	-0.7897
		KLHL21	KLHL21	1408	1515	-1.0315	-0.7891
		LGI2	LGI2	5550	1516	-0.1874	-0.7887
		DBP	DBP	4872	1517	-0.2513	-0.7877
		FAM57A	FAM57A	5479	1518	-0.1936	-0.7869
		E130306D19RIK	E130306D19RIK	8781	1519	0.1215	-0.7868
		SERPING1	SERPING1	9983	1520	0.2775	-0.7867
		TFE3	TFE3	1402	1521	-1.0343	-0.7862
		TIMM8A1	TIMM8A1	3315	1522	-0.4403	-0.7861
		PJA1	PJA1	1945	1523	-0.7669	-0.7855
		2410004A20RIK	2410004A20RIK	1568	1524	-0.94	-0.7852
		DMD	DMD	11574	1525	0.6695	-0.7849
		DPPA2	DPPA2	1277	1526	-1.1233	-0.7848
		ZIC2	ZIC2	1389	1527	-1.0446	-0.7844
		BC025920	BC025920	2605	1528	-0.5788	-0.7833
		PRDM5	PRDM5	443	1529	-2.1426	-0.7821
		SLC30A2	SLC30A2	12233	1530	1.1943	-0.7814
		LAMP3	LAMP3	2363	1531	-0.6329	-0.7813
		ALYREF2	ALYREF2	8143	1532	0.0565	-0.7812
		RBBP7	RBBP7	2046	1533	-0.7302	-0.7811
		A230050P20RIK	A230050P20RIK	869	1534	-1.5041	-0.7807
		TMEM28	TMEM28	217	1535	-2.8837	-0.7807
		MKX	MKX	2772	1536	-0.5441	-0.7806
		BEST1	BEST1	733	1537	-1.6598	-0.78
		C330024D21RIK	C330024D21RIK	3365	1538	-0.434	-0.78
		DDAH1	DDAH1	12152	1539	1.0817	-0.7794
		SHROOM4	SHROOM4	315	1540	-2.5158	-0.779
		TNFSF11	TNFSF11	80	1541	-3.8528	-0.7769
		ZCCHC14	ZCCHC14	2550	1542	-0.5875	-0.7768
		KLC3	KLC3	1418	1543	-1.0247	-0.776
		DCAF4	DCAF4	6792	1544	-0.0736	-0.7759
		GM10863	GM10863	2210	1545	-0.6773	-0.7757
		S1PR2	S1PR2	838	1546	-1.5392	-0.7756
		NRK	NRK	469	1547	-2.0844	-0.7752
		ARHGAP28	ARHGAP28	6783	1548	-0.0749	-0.7746
		G730013B05RIK	G730013B05RIK	890	1549	-1.4849	-0.7745
		NOTCH3	NOTCH3	3894	1550	-0.3578	-0.7743
		RNF135	RNF135	10465	1551	0.3613	-0.7742
		GPX4	GPX4	3751	1552	-0.3761	-0.7741
		CORT	CORT	9318	1553	0.1899	-0.774
		FRS2	FRS2	4818	1554	-0.2584	-0.7739
		LTB	LTB	896	1555	-1.4759	-0.7738
		EIF1B	EIF1B	4342	1556	-0.3059	-0.7734
		ZBTB33	ZBTB33	7786	1557	0.02	-0.7731
		GM3448,TCTE3	GM3448,TCTE3	804	1558	-1.5692	-0.773
		ARHGEF16	ARHGEF16	647	1559	-1.7723	-0.7724
		KCNH2	KCNH2	1780	1560	-0.8303	-0.7722
		DOCK11	DOCK11	10993	1561	0.468	-0.7717
		SERINC5	SERINC5	5884	1562	-0.1566	-0.7715
		5430416N02RIK	5430416N02RIK	10038	1563	0.2863	-0.7715
		PSMG2	PSMG2	2345	1564	-0.6377	-0.7714
		CCNG2	CCNG2	1368	1565	-1.0604	-0.7708
		LRRC8D	LRRC8D	5029	1566	-0.2361	-0.7707
		PRMT7	PRMT7	6369	1567	-0.1115	-0.7699
		SMARCD1	SMARCD1	1933	1568	-0.7713	-0.7693
		GNPTAB	GNPTAB	2577	1569	-0.5832	-0.7689
		ARHGEF19	ARHGEF19	10313	1570	0.3323	-0.7686
		BAI2	BAI2	2740	1571	-0.5503	-0.7682
		RPL3L	RPL3L	5592	1572	-0.1822	-0.7679
		AK7	AK7	1222	1573	-1.1577	-0.7675
		NENF	NENF	1234	1574	-1.1482	-0.7674
		DOCK6	DOCK6	4773	1575	-0.2621	-0.7663
		GNAZ	GNAZ	610	1576	-1.8224	-0.766
		ST7	ST7	11083	1577	0.4912	-0.7659
		2900041M22RIK	2900041M22RIK	2018	1578	-0.738	-0.7659
		MVP	MVP	949	1579	-1.4136	-0.7657
		PNPLA7	PNPLA7	748	1580	-1.6429	-0.7648
		L2HGDH	L2HGDH	8444	1581	0.0869	-0.7645
		ARHGAP22	ARHGAP22	1073	1582	-1.2833	-0.764
		PPP1R13L	PPP1R13L	6512	1583	-0.0978	-0.764
		TCEAL5	TCEAL5	1471	1584	-0.9967	-0.764
		PHF15	PHF15	690	1585	-1.7149	-0.7632
		GNG3	GNG3	774	1586	-1.6057	-0.7629
		NRARP	NRARP	6699	1587	-0.0822	-0.7613
		PLD2	PLD2	4992	1588	-0.24	-0.7609
		5730508B09RIK	5730508B09RIK	4010	1589	-0.3422	-0.7606
		SLC7A5	SLC7A5	6687	1590	-0.083	-0.7603
		VPS36	VPS36	2778	1591	-0.5421	-0.7595
		2009-09-01	2009-09-01	5054	1592	-0.2337	-0.7591
		ZFP750	ZFP750	455	1593	-2.1199	-0.7588
		ITGB1	ITGB1	4616	1594	-0.2795	-0.7586
		TMEM86A	TMEM86A	1860	1595	-0.7967	-0.7584
		TLK1	TLK1	3806	1596	-0.3691	-0.7584
		LONRF3	LONRF3	11895	1597	0.8549	-0.7573
		ACSL4	ACSL4	1384	1598	-1.0485	-0.7566
		CABLES1	CABLES1	11218	1599	0.5325	-0.7565
		IL17D	IL17D	128	1600	-3.4469	-0.7563
		OXSR1	OXSR1	2839	1601	-0.5291	-0.7561
		PARP10	PARP10	1184	1602	-1.1898	-0.7561
		ASPH	ASPH	4255	1603	-0.3172	-0.7558
		TMEM151A	TMEM151A	418	1604	-2.1913	-0.7555
		BCAR1	BCAR1	928	1605	-1.4424	-0.7554
		ABHD11	ABHD11	6450	1606	-0.1032	-0.7538
		MIIP	MIIP	6198	1607	-0.1266	-0.7534
		TNIP1	TNIP1	10364	1608	0.3428	-0.7521
		EXOC6	EXOC6	1490	1609	-0.982	-0.7519
		KHK	KHK	522	1610	-1.9682	-0.7514
		2400003C14RIK	2400003C14RIK	7636	1611	0.0072	-0.7508
		BNC2	BNC2	84	1612	-3.8284	-0.7499
		USP44	USP44	407	1613	-2.2118	-0.7498
		AMOTL1	AMOTL1	7647	1614	0.008	-0.749
		HAND1	HAND1	25	1615	-4.9889	-0.748
		SYNM	SYNM	736	1616	-1.656	-0.7479
		SPECC1	SPECC1	628	1617	-1.8024	-0.7479
		ERO1L	ERO1L	4219	1618	-0.3209	-0.7478
		ACOT9	ACOT9	6021	1619	-0.1422	-0.7477
		1810032O08RIK	1810032O08RIK	5336	1620	-0.2061	-0.7476
		ACOT10	ACOT10	4784	1621	-0.2616	-0.7469
		CCDC125	CCDC125	1154	1622	-1.2161	-0.7466
		GRAMD4	GRAMD4	6743	1623	-0.0787	-0.7456
		NOD1	NOD1	9012	1624	0.1484	-0.7449
		G530011O06RIK	G530011O06RIK	1681	1625	-0.8704	-0.744
		ZKSCAN17	ZKSCAN17	4091	1626	-0.3347	-0.7423
		INPP5F	INPP5F	4186	1627	-0.3243	-0.7422
		4933438K21RIK	4933438K21RIK	1758	1628	-0.8369	-0.7421
		ACAN	ACAN	1281	1629	-1.12	-0.742
		SYP	SYP	188	1630	-2.9975	-0.742
		SLC4A5	SLC4A5	12409	1631	1.4953	-0.7407
		AQP5	AQP5	152	1632	-3.2673	-0.7406
		ARHGEF4	ARHGEF4	5210	1633	-0.2184	-0.7399
		BBS12	BBS12	1819	1634	-0.8144	-0.7393
		RPRD1A	RPRD1A	2804	1635	-0.5357	-0.7386
		MMP15	MMP15	3375	1636	-0.4321	-0.7383
		CKAP5	CKAP5	4271	1637	-0.3156	-0.7373
		VEZF1	VEZF1	2963	1638	-0.5083	-0.7372
		NUDT21	NUDT21	3901	1639	-0.3572	-0.7372
		GM9833	GM9833	2158	1640	-0.6893	-0.7371
		PIGY	PIGY	4067	1641	-0.3372	-0.7367
		XLR3C	XLR3C	11315	1642	0.5629	-0.7366
		BCL7C	BCL7C	4642	1643	-0.2765	-0.7359
		FIGF	FIGF	1059	1644	-1.2929	-0.7352
		ATP7B	ATP7B	1500	1645	-0.9729	-0.7351
		VPS26A	VPS26A	2803	1646	-0.5363	-0.7347
		PTER	PTER	11545	1647	0.6553	-0.7345
		STON2	STON2	2283	1648	-0.6578	-0.7344
		CLCN3	CLCN3	4472	1649	-0.292	-0.7343
		PKM2	PKM2	2773	1650	-0.5433	-0.734
		ACAP1	ACAP1	1153	1651	-1.2164	-0.7336
		PATL2	PATL2	2166	1652	-0.6876	-0.7336
		MYEF2	MYEF2	2280	1653	-0.6582	-0.7335
		PYCR1	PYCR1	12141	1654	1.0662	-0.7329
		IGLON5	IGLON5	233	1655	-2.8246	-0.7328
		CORO1A	CORO1A	161	1656	-3.2307	-0.7325
		MARK4	MARK4	4362	1657	-0.3041	-0.732
		LAMB2	LAMB2	11136	1658	0.5076	-0.7315
		AKR1B8	AKR1B8	1098	1659	-1.2614	-0.7308
		FAM3C	FAM3C	4926	1660	-0.2462	-0.73
		DST	DST	6388	1661	-0.1091	-0.7299
		DDX58	DDX58	637	1662	-1.791	-0.7298
		NEURL2	NEURL2	2474	1663	-0.605	-0.7296
		GRB14	GRB14	790	1664	-1.59	-0.7285
		FAM49B	FAM49B	11013	1665	0.472	-0.7282
		PVRL3	PVRL3	3741	1666	-0.3769	-0.7278
		DDX4	DDX4	399	1667	-2.2289	-0.7275
		H2-BL	H2-BL	10774	1668	0.4151	-0.7274
		RPL18A	RPL18A	8733	1669	0.1176	-0.7272
		MTAP1B	MTAP1B	664	1670	-1.7522	-0.7268
		GM3336	GM3336	7744	1671	0.0166	-0.726
		RAVER2	RAVER2	599	1672	-1.8375	-0.7255
		RUFY1	RUFY1	5317	1673	-0.2083	-0.725
		RPS6KA3	RPS6KA3	1944	1674	-0.7671	-0.7249
		AQP11	AQP11	11255	1675	0.5434	-0.7243
		NFYB	NFYB	3541	1676	-0.4042	-0.724
		NOS3	NOS3	259	1677	-2.7197	-0.7235
		SRL	SRL	1194	1678	-1.1811	-0.7223
		AI428936	AI428936	8674	1679	0.1115	-0.7216
		WHSC1L1	WHSC1L1	3389	1680	-0.4303	-0.721
		GTDC1	GTDC1	3619	1681	-0.3942	-0.721
		FAM199X	FAM199X	2871	1682	-0.5246	-0.7208
		MBOAT2	MBOAT2	5735	1683	-0.1691	-0.7199
		ATG16L2	ATG16L2	6055	1684	-0.1394	-0.7199
		STIM1	STIM1	1918	1685	-0.7772	-0.7198
		STAT5B	STAT5B	5377	1686	-0.2025	-0.7197
		ZFP791	ZFP791	3508	1687	-0.4087	-0.7184
		MAGEE1	MAGEE1	7502	1688	-0.0071	-0.7181
		POLR2M	POLR2M	6879	1689	-0.0658	-0.7179
		DTWD2	DTWD2	5977	1690	-0.1466	-0.7179
		MNAT1	MNAT1	6397	1691	-0.1082	-0.7174
		MTAP	MTAP	10328	1692	0.335	-0.7164
		DDX39	DDX39	2098	1693	-0.7112	-0.7161
		RPL13	RPL13	6926	1694	-0.0621	-0.716
		ZFP930	ZFP930	7511	1695	-0.0067	-0.7144
		PTGR1	PTGR1	1366	1696	-1.0609	-0.7143
		NFATC3	NFATC3	3634	1697	-0.3929	-0.7142
		2810013P06RIK	2810013P06RIK	1537	1698	-0.9567	-0.7137
		PTPRU	PTPRU	395	1699	-2.2526	-0.7136
		NEURL1A	NEURL1A	3893	1700	-0.3579	-0.713
		RALGDS	RALGDS	4247	1701	-0.3179	-0.7125
		PI4K2B	PI4K2B	1285	1702	-1.119	-0.7124
		ZFP956	ZFP956	1907	1703	-0.7808	-0.7122
		HNF4A	HNF4A	773	1704	-1.6079	-0.7121
		PPP2R3A	PPP2R3A	7437	1705	-0.0133	-0.7118
		2810468N07RIK	2810468N07RIK	1142	1706	-1.2228	-0.7115
		PTPN21	PTPN21	2472	1707	-0.6053	-0.7114
		BPTF	BPTF	2645	1708	-0.5705	-0.7107
		PLS1	PLS1	1623	1709	-0.9068	-0.7106
		FAM162A	FAM162A	1464	1710	-1.0012	-0.7105
		SNORA64	SNORA64	11370	1711	0.5819	-0.7101
		SYNE1	SYNE1	2055	1712	-0.7282	-0.7101
		ZMYND15	ZMYND15	433	1713	-2.1578	-0.7094
		HIST1H2AO,HIST1H2AP	HIST1H2AO,HIST1H2AP	961	1714	-1.406	-0.7085
		GM5803	GM5803	4263	1715	-0.3163	-0.7085
		SNX10	SNX10	3639	1716	-0.3922	-0.7084
		ZFP609	ZFP609	2293	1717	-0.6553	-0.7079
		FAM123B	FAM123B	8853	1718	0.1304	-0.7078
		EPOR	EPOR	458	1719	-2.1076	-0.7075
		LMTK2	LMTK2	1828	1720	-0.8101	-0.7067
		ACTA1	ACTA1	3357	1721	-0.4348	-0.7066
		NFAT5	NFAT5	1346	1722	-1.076	-0.7064
		HOOK3	HOOK3	9965	1723	0.2754	-0.7061
		MEX3B	MEX3B	12542	1724	1.8608	-0.7061
		UNC93B1	UNC93B1	7246	1725	-0.0314	-0.705
		GCH1	GCH1	1981	1726	-0.7503	-0.7047
		NEIL1	NEIL1	5622	1727	-0.1798	-0.7047
		2210013O21RIK	2210013O21RIK	5424	1728	-0.1978	-0.7044
		XPOT	XPOT	5283	1729	-0.2118	-0.7043
		FBXL17	FBXL17	2389	1730	-0.6256	-0.7043
		BCL9L	BCL9L	7065	1731	-0.0499	-0.7043
		KIFC3	KIFC3	453	1732	-2.1226	-0.7037
		ZFP828	ZFP828	1687	1733	-0.8672	-0.7037
		TJP2	TJP2	1808	1734	-0.8188	-0.7035
		SNORD1C	SNORD1C	839	1735	-1.5391	-0.7033
		CHRM4	CHRM4	2029	1736	-0.7348	-0.7031
		NOB1	NOB1	2622	1737	-0.5746	-0.7031
		ITGAE	ITGAE	10451	1738	0.3585	-0.703
		PFKL	PFKL	3713	1739	-0.3806	-0.7028
		D14ERTD449E	D14ERTD449E	4985	1740	-0.2407	-0.7027
		AARS	AARS	6788	1741	-0.0739	-0.7025
		LDLRAD3	LDLRAD3	767	1742	-1.6181	-0.702
		ABCD4	ABCD4	7394	1743	-0.0182	-0.7018
		RABGAP1L	RABGAP1L	5608	1744	-0.1808	-0.7017
		TTLL4	TTLL4	4232	1745	-0.3196	-0.7016
		NMRAL1	NMRAL1	3778	1746	-0.3723	-0.7015
		ANXA11	ANXA11	1463	1747	-1.0013	-0.7012
		BMP8B	BMP8B	1714	1748	-0.8571	-0.701
		GM5635	GM5635	12065	1749	0.9959	-0.7006
		GGCT	GGCT	2482	1750	-0.602	-0.6996
		DNAHC8	DNAHC8	11838	1751	0.8174	-0.6987
		SMPD1	SMPD1	6895	1752	-0.0643	-0.6986
		ABCB10	ABCB10	2886	1753	-0.5216	-0.6985
		USP6NL	USP6NL	5943	1754	-0.1503	-0.6978
		EIF5	EIF5	4177	1755	-0.3255	-0.697
		USP3	USP3	10318	1756	0.3337	-0.6969
		APPL1	APPL1	5627	1757	-0.1792	-0.6969
		SNORD15A	SNORD15A	1886	1758	-0.7866	-0.6969
		STAT3	STAT3	5381	1759	-0.2021	-0.6955
		GNB1L	GNB1L	9497	1760	0.2132	-0.6953
		DCTD	DCTD	7900	1761	0.0314	-0.6953
		SNX8	SNX8	1820	1762	-0.8143	-0.6937
		4931414P19RIK	4931414P19RIK	1843	1763	-0.8042	-0.6936
		SPAG9	SPAG9	6980	1764	-0.0577	-0.6935
		4930539E08RIK	4930539E08RIK	4679	1765	-0.2727	-0.6933
		SNX24	SNX24	1209	1766	-1.1689	-0.6924
		DNAJB2	DNAJB2	10539	1767	0.3743	-0.6922
		YES1	YES1	9875	1768	0.2631	-0.6921
		B4GALNT3	B4GALNT3	5312	1769	-0.2087	-0.6921
		ZFP866	ZFP866	3240	1770	-0.4522	-0.692
		PNRC2	PNRC2	6159	1771	-0.1302	-0.6918
		MEIS3	MEIS3	2692	1772	-0.5604	-0.6917
		RRAGB	RRAGB	608	1773	-1.8239	-0.691
		ABI2	ABI2	2128	1774	-0.7004	-0.6907
		NPEPPS	NPEPPS	5461	1775	-0.1949	-0.6902
		SLC25A41	SLC25A41	137	1776	-3.3991	-0.6896
		XPO4	XPO4	1902	1777	-0.7817	-0.6892
		MIF	MIF	3082	1778	-0.4841	-0.6891
		DUSP1	DUSP1	11533	1779	0.6518	-0.6889
		HDGF	HDGF	3101	1780	-0.48	-0.6883
		DDX19B	DDX19B	4087	1781	-0.3354	-0.687
		APOA2	APOA2	1432	1782	-1.0171	-0.6868
		KLK10	KLK10	892	1783	-1.4821	-0.6866
		SEC16A	SEC16A	1396	1784	-1.0383	-0.6865
		MT2	MT2	5072	1785	-0.2322	-0.6852
		BBX	BBX	6935	1786	-0.0615	-0.6848
		EMILIN1	EMILIN1	1635	1787	-0.8977	-0.6846
		HOOK2	HOOK2	2829	1788	-0.5309	-0.6844
		STAT5A	STAT5A	11247	1789	0.5421	-0.683
		ACTB	ACTB	3717	1790	-0.3802	-0.6829
		DOCK1	DOCK1	8347	1791	0.0763	-0.6826
		SLC25A13	SLC25A13	4739	1792	-0.2655	-0.682
		CARM1	CARM1	2849	1793	-0.5279	-0.6817
		PHOX2A	PHOX2A	848	1794	-1.5282	-0.6817
		PPM1F	PPM1F	6824	1795	-0.0707	-0.6814
		SUV39H2	SUV39H2	4653	1796	-0.2751	-0.6812
		DAZAP1	DAZAP1	3696	1797	-0.3836	-0.681
		ART1	ART1	1188	1798	-1.1879	-0.681
		ARL2	ARL2	2683	1799	-0.563	-0.6808
		AVPI1	AVPI1	2822	1800	-0.5324	-0.6806
		AMACR	AMACR	2953	1801	-0.5099	-0.6804
		MSRA	MSRA	5201	1802	-0.2196	-0.6796
		PARP3	PARP3	2965	1803	-0.508	-0.6794
		RDX	RDX	4965	1804	-0.2427	-0.6793
		COMTD1	COMTD1	6281	1805	-0.119	-0.6782
		TRERF1	TRERF1	1776	1806	-0.8308	-0.678
		INSC	INSC	30	1807	-4.7899	-0.678
		PDE4C	PDE4C	9298	1808	0.1876	-0.6776
		PRSS8	PRSS8	1319	1809	-1.1	-0.6773
		SGSM1	SGSM1	9360	1810	0.1951	-0.6772
		PARVA	PARVA	3344	1811	-0.4369	-0.6767
		FGFRL1	FGFRL1	6814	1812	-0.0717	-0.6762
		RHBDF1	RHBDF1	1980	1813	-0.7505	-0.6758
		AW209491	AW209491	1930	1814	-0.7718	-0.6755
		GADD45GIP1	GADD45GIP1	4779	1815	-0.2617	-0.6747
		MOV10	MOV10	4249	1816	-0.3177	-0.6745
		SOX11	SOX11	449	1817	-2.1306	-0.6745
		CSNK2A2	CSNK2A2	3188	1818	-0.464	-0.6743
		SLC17A7	SLC17A7	515	1819	-2.0009	-0.6741
		ATAD2	ATAD2	5896	1820	-0.1549	-0.6738
		RNPC3	RNPC3	2599	1821	-0.5796	-0.6737
		PLIN5	PLIN5	1266	1822	-1.1311	-0.6734
		ACE	ACE	6368	1823	-0.1115	-0.6731
		INTS6	INTS6	2597	1824	-0.5799	-0.673
		TIAM1	TIAM1	4042	1825	-0.3395	-0.6721
		PLXNA3	PLXNA3	9906	1826	0.2672	-0.6715
		KIF16B	KIF16B	10803	1827	0.4204	-0.6703
		MS4A6C	MS4A6C	1697	1828	-0.8644	-0.6701
		PLA2G6	PLA2G6	1801	1829	-0.8229	-0.67
		E330009J07RIK	E330009J07RIK	1641	1830	-0.8927	-0.67
		SLC25A12	SLC25A12	4352	1831	-0.3052	-0.6698
		SMOC1	SMOC1	8252	1832	0.0665	-0.6696
		SYCE2	SYCE2	5576	1833	-0.1845	-0.6696
		ARAP2	ARAP2	2069	1834	-0.7247	-0.6687
		GPR153	GPR153	230	1835	-2.8335	-0.6686
		ERDR1	ERDR1	12281	1836	1.2593	-0.6686
		PPP2CB	PPP2CB	5258	1837	-0.2137	-0.6684
		HERPUD1	HERPUD1	5981	1838	-0.1453	-0.6684
		PHIP	PHIP	4735	1839	-0.266	-0.6678
		ANXA3	ANXA3	640	1840	-1.7844	-0.6676
		PPID	PPID	2875	1841	-0.5238	-0.6673
		AMOTL2	AMOTL2	12079	1842	1.0156	-0.6671
		SYT13	SYT13	46	1843	-4.4084	-0.6666
		LAT2	LAT2	2487	1844	-0.6014	-0.6659
		MDM4	MDM4	6851	1845	-0.0685	-0.6657
		ARL4A	ARL4A	2052	1846	-0.7288	-0.6652
		CDON	CDON	3022	1847	-0.497	-0.6649
		GAS5	GAS5	10630	1848	0.3901	-0.6643
		PRPS2	PRPS2	1430	1849	-1.0179	-0.6642
		COX4I1	COX4I1	2499	1850	-0.599	-0.6639
		NKRF	NKRF	5048	1851	-0.2343	-0.6638
		PHF7	PHF7	1246	1852	-1.1433	-0.6637
		AU022751	AU022751	1684	1853	-0.8697	-0.6634
		TMEM57	TMEM57	1251	1854	-1.1394	-0.6633
		UNC119	UNC119	9974	1855	0.2766	-0.6631
		ASF1A	ASF1A	2106	1856	-0.7088	-0.6626
		1700054N08RIK	1700054N08RIK	3953	1857	-0.3502	-0.6626
		2700029M09RIK	2700029M09RIK	4930	1858	-0.2459	-0.6622
		RNF187	RNF187	2954	1859	-0.5098	-0.6619
		MPDZ	MPDZ	2064	1860	-0.7253	-0.6617
		ZFP658	ZFP658	1108	1861	-1.2538	-0.6616
		PCDHGA12	PCDHGA12	6892	1862	-0.0645	-0.6616
		TNK1	TNK1	7145	1863	-0.0407	-0.6609
		ASXL1	ASXL1	3221	1864	-0.4561	-0.6605
		FPGS	FPGS	8529	1865	0.0956	-0.6605
		TLCD2	TLCD2	4180	1866	-0.3248	-0.6605
		LIMS1	LIMS1	7904	1867	0.0316	-0.6601
		UBE4B	UBE4B	1983	1868	-0.7498	-0.6592
		SIN3B	SIN3B	10581	1869	0.3813	-0.6588
		2008-09-01	2008-09-01	12167	1870	1.0938	-0.6587
		TMPRSS5	TMPRSS5	1498	1871	-0.9774	-0.6586
		ANP32E	ANP32E	3536	1872	-0.405	-0.6584
		RPL10	RPL10	10798	1873	0.4201	-0.6584
		MID1IP1	MID1IP1	754	1874	-1.6343	-0.6584
		UBE3A	UBE3A	2571	1875	-0.584	-0.6575
		ATP6V1B2	ATP6V1B2	3505	1876	-0.4093	-0.6574
		IL13RA1	IL13RA1	9823	1877	0.2558	-0.6569
		PCM1	PCM1	3208	1878	-0.4592	-0.6568
		MIR704	MIR704	3706	1879	-0.3815	-0.6567
		MCTP2	MCTP2	676	1880	-1.7324	-0.6566
		TMEM59L	TMEM59L	149	1881	-3.2791	-0.6565
		ADA	ADA	1958	1882	-0.7611	-0.6556
		APRT	APRT	3074	1883	-0.4868	-0.6553
		ARRDC3	ARRDC3	1438	1884	-1.0146	-0.6552
		CAPSL	CAPSL	11363	1885	0.5796	-0.6551
		ETHE1	ETHE1	2469	1886	-0.6057	-0.6546
		NAF1	NAF1	1750	1887	-0.8406	-0.6546
		CRLF3	CRLF3	5617	1888	-0.18	-0.6546
		ME2	ME2	2260	1889	-0.6661	-0.654
		PPM1A	PPM1A	2557	1890	-0.587	-0.6538
		SLC29A2	SLC29A2	9400	1891	0.201	-0.6537
		FAM60A	FAM60A	1943	1892	-0.7678	-0.6533
		ZC4H2	ZC4H2	1421	1893	-1.0233	-0.6532
		GMPS	GMPS	2877	1894	-0.5236	-0.6529
		POLB	POLB	3584	1895	-0.3992	-0.6527
		ZBED3	ZBED3	6962	1896	-0.0594	-0.6527
		HIST1H2AK	HIST1H2AK	3600	1897	-0.3968	-0.6526
		ATXN7L1	ATXN7L1	1228	1898	-1.15	-0.6523
		FKBP11	FKBP11	7890	1899	0.0303	-0.652
		VDAC3	VDAC3	3648	1900	-0.391	-0.6514
		SPC24	SPC24	8078	1901	0.0507	-0.6508
		EIF4B	EIF4B	4988	1902	-0.2404	-0.6507
		SLC2A5	SLC2A5	3594	1903	-0.3977	-0.6503
		PATZ1	PATZ1	10679	1904	0.3979	-0.6494
		HABP4	HABP4	3225	1905	-0.4555	-0.6491
		KIF23	KIF23	5535	1906	-0.1892	-0.6491
		LCORL	LCORL	5993	1907	-0.1441	-0.649
		SNORD32A	SNORD32A	5366	1908	-0.2033	-0.649
		PLEKHM3	PLEKHM3	8591	1909	0.1031	-0.6478
		BC017612	BC017612	1001	1910	-1.3507	-0.647
		TIAM2	TIAM2	11071	1911	0.4883	-0.647
		SMARCA5-PS	SMARCA5-PS	1952	1912	-0.764	-0.6467
		D15ERTD621E	D15ERTD621E	6502	1913	-0.0986	-0.6466
		SLC5A6	SLC5A6	10338	1914	0.3369	-0.6464
		MAML1	MAML1	6759	1915	-0.077	-0.6464
		USP15	USP15	2151	1916	-0.6904	-0.6463
		CDT1	CDT1	3644	1917	-0.3917	-0.646
		PUS7	PUS7	3583	1918	-0.3992	-0.6458
		ALAD	ALAD	8054	1919	0.0474	-0.6455
		GLT1D1	GLT1D1	2039	1920	-0.7329	-0.6451
		NBN	NBN	6484	1921	-0.0999	-0.645
		ENO3	ENO3	378	1922	-2.3136	-0.645
		CREB1	CREB1	2102	1923	-0.7099	-0.6448
		TRDMT1	TRDMT1	4128	1924	-0.3308	-0.6448
		RAI1	RAI1	1449	1925	-1.0097	-0.6445
		1110021L09RIK	1110021L09RIK	10832	1926	0.4287	-0.644
		TSNAX	TSNAX	2554	1927	-0.5874	-0.6434
		LRCH2	LRCH2	2994	1928	-0.5025	-0.6433
		LIPH	LIPH	1240	1929	-1.1452	-0.6432
		RPL30	RPL30	11046	1930	0.4803	-0.6431
		ZCCHC2	ZCCHC2	3722	1931	-0.3795	-0.6429
		CD59B	CD59B	11195	1932	0.5289	-0.6427
		PRPS1L3	PRPS1L3	4780	1933	-0.2617	-0.642
		MELK	MELK	3790	1934	-0.3712	-0.6419
		KCNRG	KCNRG	2926	1935	-0.5152	-0.6419
		A4GALT	A4GALT	12294	1936	1.281	-0.641
		SNORA16A	SNORA16A	3233	1937	-0.4542	-0.6408
		GM7977	GM7977	2691	1938	-0.5605	-0.6404
		UFSP2	UFSP2	1252	1939	-1.1387	-0.6403
		SNHG9	SNHG9	2307	1940	-0.6504	-0.64
		GPR98	GPR98	893	1941	-1.4795	-0.6399
		CLK2	CLK2	7602	1942	0.0034	-0.6393
		MAP3K1	MAP3K1	5089	1943	-0.2309	-0.6392
		RYR1	RYR1	1858	1944	-0.7977	-0.6391
		A230073K19RIK	A230073K19RIK	2130	1945	-0.6994	-0.6389
		PTPRF	PTPRF	1667	1946	-0.8763	-0.6389
		FAM118A	FAM118A	9790	1947	0.2529	-0.6387
		HOMER1	HOMER1	5574	1948	-0.1847	-0.6382
		PIGW	PIGW	4968	1949	-0.2424	-0.6382
		PACSIN1	PACSIN1	1531	1950	-0.9584	-0.6382
		MAGEE2	MAGEE2	1873	1951	-0.791	-0.6382
		FOS	FOS	2071	1952	-0.7233	-0.6382
		GM6498	GM6498	7797	1953	0.0211	-0.638
		SNORA52	SNORA52	8714	1954	0.1156	-0.6379
		HMGB2	HMGB2	4277	1955	-0.3149	-0.6378
		4933404K08RIK	4933404K08RIK	4564	1956	-0.2831	-0.6377
		PDK1	PDK1	633	1957	-1.7963	-0.6377
		RAB25	RAB25	696	1958	-1.7079	-0.6377
		FAM129A	FAM129A	9928	1959	0.2704	-0.6377
		A130022J15RIK	A130022J15RIK	6845	1960	-0.0686	-0.6376
		RB1	RB1	1336	1961	-1.0876	-0.6376
		UBE2V2	UBE2V2	4522	1962	-0.2871	-0.6372
		GM13363	GM13363	4340	1963	-0.3065	-0.637
		HDAC5	HDAC5	3137	1964	-0.474	-0.6369
		AMFR	AMFR	5403	1965	-0.2	-0.6369
		NUP205	NUP205	4485	1966	-0.2904	-0.6366
		MFAP3L	MFAP3L	661	1967	-1.7553	-0.6361
		PVR	PVR	11249	1968	0.5426	-0.636
		CCDC92	CCDC92	1999	1969	-0.7446	-0.6358
		D4BWG0951E	D4BWG0951E	12343	1970	1.3406	-0.6352
		PAPD5	PAPD5	4343	1971	-0.3059	-0.635
		DTX4	DTX4	1512	1972	-0.9698	-0.6349
		ZFP704	ZFP704	8970	1973	0.1438	-0.6344
		CYB5	CYB5	2079	1974	-0.7209	-0.634
		HSPBAP1	HSPBAP1	3491	1975	-0.4135	-0.6339
		PSMA8	PSMA8	3633	1976	-0.393	-0.6338
		CFL2	CFL2	11183	1977	0.5266	-0.6336
		CLN3	CLN3	5315	1978	-0.2084	-0.6335
		ULK2	ULK2	2329	1979	-0.6414	-0.6332
		KCNN2	KCNN2	2121	1980	-0.7057	-0.6331
		CPNE3	CPNE3	11200	1981	0.5296	-0.6331
		CTR9	CTR9	5142	1982	-0.226	-0.6324
		S100A6	S100A6	48	1983	-4.3796	-0.6321
		ZFP770	ZFP770	3030	1984	-0.4957	-0.6309
		MPP7	MPP7	3987	1985	-0.3461	-0.6307
		EIF2AK4	EIF2AK4	7273	1986	-0.0287	-0.6306
		GM9958	GM9958	4268	1987	-0.3159	-0.6305
		FAM82A1	FAM82A1	9516	1988	0.2162	-0.6304
		GPT	GPT	6676	1989	-0.0846	-0.6301
		CTF1	CTF1	1630	1990	-0.9006	-0.6295
		SPIN1	SPIN1	2899	1991	-0.5193	-0.6293
		CLTB	CLTB	1443	1992	-1.0118	-0.6292
		CCDC114	CCDC114	2533	1993	-0.5906	-0.6292
		KANK1	KANK1	4962	1994	-0.2432	-0.6286
		UBE2A	UBE2A	7804	1995	0.0216	-0.628
		MAFA	MAFA	11375	1996	0.5841	-0.6278
		WDSUB1	WDSUB1	8643	1997	0.1083	-0.6272
[truncated: 10,695 more rows]

## Sheet: Ex Data Fig 3F
Fig S3F	Hypergeometric Test and RNA-seq data in serum-free (KSR) media conditions										Source Data for Extended Data Figure 3F, Section #1: A list of all genes detected, and FPKM values for all replicates, from mouse PSCs cultured in Serum-free KSR/LIF, 2i, or CDK8/19i (8i)												Source Data for Extended Data Figure 3F, Section #2: List of genes up-regulated (red font) or down-regulated (green font) in Serum-free KSR/LIF versus 2i conditions. Yellow highlight indicates genes with Log2 fold-change with FDR<0.01.																Source Data for Extended Data Figure 3F, Section #3: List of genes up-regulated (red font) or down-regulated (green font) in Serum-free KSR/LIF versus CDK8/19i conditions. Yellow highlight indicates genes with Log2 fold-change with FDR<0.01.
Source Data for Extended Data Figure 3F is shown. BELOW, the hypergeometric significance test for the Venn diagram shown in Extended Data Figure 3F. ON THE RIGHT: lists of mRNA expression changes in the indicated inhibitor and media treatments, in serum-free/LIF media (KSR = Knockout Serum Replacement media). The lists are shown in sections as follows: Section 1: all genes detected, and FPKM valu…
																							FDR<0.05																FDR<0.05
											Serum-free RNA-seq gene expression, n=3 replicates.												UPREGULATED in 2i_vs_KSR/LIF																UPREGULATED in CDK8/19ivsKSR/LIF
																							DOWNREGULATED in 2i_vs_KSR/LIF																DOWNREGULATED in CDK8/19ivsKSR/LIF
											Tracking_ID	Sample_2i_A1_R1	Sample_2i_B1_R1	Sample_2i_C1_R1	Sample_8i-B1_R1	Sample_8i_A1_R1	Sample_8i_C1_R1	Sample_KSR Control_A1_R1	Sample_KSR Control_B1_R1	Sample_KSR Control_C1_R1			test_id	gene_id	gene	locus	sample_1	sample_2	status	FPKM_KSR/LIF	FPKM_2i	log2(fold_change)	test_stat	p_value	q_valuesignificant				test_id	gene_id	gene	locus	sample_1	sample_2	status	FPKM_KSR/LIF	FPKM_CDK8/19i	log2(fold_change)	test_stat
											A030009H04Rik	1.16802	0.888476	1.14888	1.8774	1.73899	1.4943	1.55551	1.52604	1.44281			1700013H16Rik	1700013H16Rik	1700013H16Rik	chrX:53742900-53757831	KSR	2i	OK	81.5052	40.9128	-0.994339	10.3428	0	0	yes			Hoxa10	Hoxa10	Hoxa10	chr6:52231196-52240854	KSR	ETP	OK	0.821125	9.0012	3.45444	-8.94086
											A130010J15Rik	2.1652	2.59201	2.50427	3.65979	3.12196	3.23132	3.18166	2.76724	3.17552			1700097N02Rik	1700097N02Rik	1700097N02Rik	chr17:30622440-30626905	KSR	2i	OK	5.21937	28.332	2.44049	-9.78402	0	0	yes			Akr1b3	Akr1b3	Akr1b3	chr6:34303929-34317489	KSR	ETP	OK	7.18252	55.4332	2.94819	-9.02553
											A130022J15Rik	1.81686	1.75939	2.12757	1.52828	2.04317	1.9152	2.24993	1.6594	2.01187			2310039L15Rik	2310039L15Rik	2310039L15Rik	chr10:95336275-95363216	KSR	2i	OK	81.4728	26.5445	-1.61791	11.668	0	0	yes			Atp6v0c	Atp6v0c	Atp6v0c	chr17:24163864-24169429	KSR	ETP	OK	33.4027	209.13	2.64637	-15.427
											A130040M12Rik	1.58951	2.34241	2.15295	3.00927	3.31063	3.21487	3.14291	4.02149	4.67232			AF067061	AF067061	AF067061	chr13:120263113-120264517	KSR	2i	OK	35.8332	13.3664	-1.42269	8.62763	0	0	yes			Slc26a10	Slc26a10	Slc26a10	chr10:127172425-127180645	KSR	ETP	OK	1.53849	8.80395	2.51663	-8.4117
											A130049A11Rik	3.2394	2.88972	2.8116	3.29879	3.35768	2.94922	2.67308	1.92757	2.33273			Abt1	Abt1	Abt1	chr13:23418360-23423866	KSR	2i	OK	38.0111	15.589	-1.28589	15.0232	0	0	yes			Ccnd2	Ccnd2	Ccnd2	chr6:127125708-127212419	KSR	ETP	OK	2.68066	11.1894	2.06148	-13.3672
											A130077B15Rik	42.2521	53.723	41.7236	28.9992	28.3389	31.2805	54.7275	60.083	57.1673			Acss1	Acss1	Acss1	chr2:150618110-150668932	KSR	2i	OK	2.5204	7.65905	1.60351	-8.80286	0	0	yes			Dkk1	Dkk1	Dkk1	chr19:30545884-30549496	KSR	ETP	OK	2.79992	11.5335	2.04237	-9.11902
											A1bg	0	0	0	0	0	0	0	0	0			Acta2	Acta2	Acta2	chr19:34241090-34255336	KSR	2i	OK	21.2117	4.7678	-2.15346	11.4379	0	0	yes			Dab2	Dab2	Dab2	chr15:6299788-6440709	KSR	ETP	OK	21.3992	73.3452	1.77715	-27.4377
											A1cf	0	0	0	0	0	0	0	0	0			Aff1	Aff1	Aff1	chr5:103754161-103855322	KSR	2i	OK	13.128	22.7909	0.795812	-14.9871	0	0	yes			Hnf1b	Hnf1b	Hnf1b	chr11:83850868-83905815	KSR	ETP	OK	3.71331	12.5988	1.76251	-9.2541
											A230001M10Rik	0	0	0	0	0	0	0.0829725	0	0			Ak4	Ak4	Ak4	chr4:101419288-101467771	KSR	2i	OK	32.9221	19.8451	-0.730276	9.22671	0	0	yes			Aqp8	Aqp8	Aqp8	chr7:123462293-123468003	KSR	ETP	OK	10.1882	33.7747	1.72904	-12.1438
											A230020J21Rik	0.18359	0.318041	0.448456	0.672136	0.682827	0.59982	0.505568	0.809409	0.699334			Alg13	Alg13	Alg13	chrX:144317965-144374448	KSR	2i	OK	46.2589	75.1133	0.699337	-10.1411	0	0	yes			H2-Eb1	H2-Eb1	H2-Eb1	chr17:34305866-34316674	KSR	ETP	OK	5.39933	17.5776	1.70288	-8.70919
											A230028O05Rik	0.0385597	0.0287097	0.12916	0.24706	0.0318399	0.118346	0.0616434	0	0			Amot	Amot	Amot	chrX:145446423-145487046	KSR	2i	OK	3.54446	0.461146	-2.94227	9.74311	0	0	yes			Islr2	Islr2	Islr2	chr9:58196296-58208808	KSR	ETP	OK	11.1898	35.6399	1.67131	-19.1169
											A230046K03Rik	25.4729	27.6786	25.5791	32.5659	26.9971	31.0134	25.8501	27.0643	24.6987			Anp32a	Anp32a	Anp32a	chr9:62341342-62378805	KSR	2i	OK	84.5322	148.874	0.816519	-11.4539	0	0	yes			Flrt3	Flrt3	Flrt3	chr2:140395429-142390050	KSR	ETP	OK	5.77513	18.2424	1.65937	-12.6273
											A230050P20Rik	4.69275	4.28163	4.49127	2.55865	3.52175	3.54964	4.4149	4.66423	4.68888			Anxa1	Anxa1	Anxa1	chr19:20373433-20390671	KSR	2i	OK	16.9032	4.40875	-1.93886	8.79152	0	0	yes			Foxq1	Foxq1	Foxq1	chr13:31558169-31560974	KSR	ETP	OK	6.23007	19.542	1.64926	-10.218
											A230051G13Rik	1.20583	1.55891	1.4989	1.57314	1.56157	1.64703	1.38599	1.17492	1.17446			Anxa2	Anxa2	Anxa2	chr9:69453682-69491785	KSR	2i	OK	34.7883	5.18504	-2.74618	13.7872	0	0	yes			Cubn	Cubn	Cubn	chr2:13276337-13491876	KSR	ETP	OK	8.45404	26.3009	1.6374	-17.5007
											A230056J06Rik	0	0	0.0269371	0.0410312	0	0.0326638	0.0261528	0.0245416	0.0274566			Apoe	Apoe	Apoe	chr7:19696243-19699166	KSR	2i	OK	254.995	604.995	1.24645	-19.0055	0	0	yes			Klb	Klb	Klb	chr5:65348410-65384003	KSR	ETP	OK	3.72709	11.4296	1.61665	-9.23317
	Hypergeometric Test										A230056P14Rik	0.0768831	0.108562	0	0.177742	0.323885	0.228256	0.126742	0.234219	0.12828			App	App	App	chr16:84954435-85173707	KSR	2i	OK	13.7694	4.15417	-1.72883	11.4845	0	0	yes			Podxl	Podxl	Podxl	chr6:31519492-31563937	KSR	ETP	OK	10.9793	31.872	1.53751	-14.7367
											A230057D06Rik	0	0	0	0	0	0	0	0	0			BB287469	BB287469,Gm4027	BB287469,Gm4027	chr12:87618867-87622955	KSR	2i	OK	41.694	10.9433	-1.92979	13.8859	0	0	yes			9930013L23Rik	9930013L23Rik	9930013L23Rik	chr7:83932856-84086505	KSR	ETP	OK	1.62374	4.70303	1.53427	-8.62657
	Total population		11939								A230065H16Rik	0.159968	0	0	0	0	0.297009	0	0	0.136762			Bcat1	Bcat1	Bcat1	chr6:144993834-145076157	KSR	2i	OK	57.3853	83.1067	0.534284	-8.96621	0	0	yes			Adamts9	Adamts9	Adamts9	chr6:92772698-92901441	KSR	ETP	OK	2.53184	7.03661	1.4747	-8.9811
	Differential in 2i		2575								A230070E04Rik	4.02743	4.22839	4.62273	0.652209	0.937703	1.31439	1.2142	0.927355	1.36061			Calcoco2	Calcoco2	Calcoco2	chr11:96099325-96111962	KSR	2i	OK	36.9797	13.4348	-1.46076	12.0293	0	0	yes			Pdgfra	Pdgfra	Pdgfra	chr5:75152290-75198204	KSR	ETP	OK	7.73381	21.3875	1.46752	-16.2455
	Differential in CDK8/19i		2167								A230072C01Rik	1.57308	2.3551	1.78183	2.39091	2.71556	2.45408	1.92887	2.34567	2.96685			Capn2	Capn2	Capn2	chr1:182467258-182517483	KSR	2i	OK	10.9297	3.97762	-1.45828	8.84143	0	0	yes			Sox7	Sox7	Sox7	chr14:63943705-63950732	KSR	ETP	OK	6.68881	17.828	1.41432	-9.71304
	Overlap		944								A230072E10Rik	0.893137	0.92478	0.898155	1.02955	0.897231	0.670061	1.23927	1.05941	0.742341			Ccrn4l	Ccrn4l	Ccrn4l	chr3:51224446-51251654	KSR	2i	OK	61.866	23.3565	-1.40532	16.5521	0	0	yes			Fgfr2	Fgfr2	Fgfr2	chr7:130162450-130266808	KSR	ETP	OK	3.39149	8.8686	1.38679	-9.50397
	.										A230073K19Rik	1.07044	1.1678	1.0578	1.30321	1.51195	1.59499	1.25301	1.23197	1.36235			Cd84	Cd84	Cd84	chr1:171839696-171890718	KSR	2i	OK	23.8269	7.39206	-1.68854	14.1797	0	0	yes			Itm2a	Itm2a	Itm2a	chrX:107397194-107403360	KSR	ETP	OK	10.2401	26.6633	1.38063	-8.76854
	P = 2.99 x 10(-147)										A230077H06Rik	0.0353245	0.0767333	0.0296553	0.0834789	0.115708	0.104536	0.0289873	0.081768	0.0874579			Cdx1	Cdx1	Cdx1	chr18:61018861-61036199	KSR	2i	OK	4.77105	23.7318	2.31444	-12.4827	0	0	yes			Amot	Amot	Amot	chrX:145446423-145487046	KSR	ETP	OK	3.59249	9.1469	1.3483	-9.53533
											A230108P19Rik	0	0	0	0	0	0	0	0	0			Ckb	Ckb	Ckb	chr12:111669354-111672338	KSR	2i	OK	105.972	170.856	0.689097	-9.20917	0	0	yes			Gata6	Gata6	Gata6	chr18:11052509-11085635	KSR	ETP	OK	15.0476	38.2838	1.3472	-11.6854
											A2ld1	9.28159	8.12534	7.68348	14.4881	12.9831	15.3679	10.7124	9.71569	9.72013			Cldn6	Cldn6	Cldn6	chr17:23679364-23682446	KSR	2i	OK	17.8359	4.26423	-2.06442	9.63287	0	0	yes			Gata4	Gata4	Gata4	chr14:63198914-63245260	KSR	ETP	OK	11.9208	30.0508	1.33392	-11.2111
											A2m	0.563464	0.896199	0.72718	1.55249	1.53187	1.39707	1.55736	1.61225	1.79311			Clu	Clu	Clu	chr14:65968482-65981545	KSR	2i	OK	19.3708	2.26649	-3.09535	11.9062	0	0	yes			Srgn	Srgn	Srgn	chr10:62494427-62507755	KSR	ETP	OK	54.2943	130.948	1.27012	-11.3955
											A330009N23Rik	0.485827	0.742423	0.553749	0.614112	0.740022	0.917044	0.274246	0.321261	0.611332			Col18a1	Col18a1	Col18a1	chr10:77052178-77166530	KSR	2i	OK	43.0566	27.1858	-0.663384	8.79567	0	0	yes			Tcf15	Tcf15	Tcf15	chr2:152143608-152149096	KSR	ETP	OK	55.5834	122.8	1.14358	-9.91755
											A330021E22Rik	0.7381	0.582063	0.716111	0.543483	0.546866	0.361615	0.932227	0.585881	1.1068			Col1a1	Col1a1	Col1a1	chr11:94936269-94951856	KSR	2i	OK	4.6623	0.920928	-2.33988	8.67963	0	0	yes			Inhbb	Inhbb	Inhbb	chr1:119415464-119422248	KSR	ETP	OK	17.9374	39.4543	1.13722	-11.0502
											A330023F24Rik	0	0.0129052	0	0	0	0	0.0418898	0	0.0146723			Col1a2	Col1a2	Col1a2	chr6:4505696-4541543	KSR	2i	OK	3.67175	0.26014	-3.81911	8.5272	0	0	yes			P4ha2	P4ha2	P4ha2	chr11:54100923-54131667	KSR	ETP	OK	24.9162	52.8517	1.08487	-12.6106
											A330032B11Rik	0.0555427	0.257705	0.190246	0.0706936	0.189215	0.302685	0.21624	0.121169	0.148314			Col4a1	Col4a1	Col4a1	chr8:11198422-11312826	KSR	2i	OK	75.7312	12.1279	-2.64255	33.4787	0	0	yes			Gm7325	Gm7325	Gm7325	chr17:45600966-45602102	KSR	ETP	OK	48.1537	92.5064	0.941906	-8.77197
											A330035P11Rik	0.322047	0.358845	0.455093	0.528051	0.225331	0.470524	0.28037	0.318849	0.412477			Col4a2	Col4a2	Col4a2	chr8:11312828-11449287	KSR	2i	OK	39.8829	5.85002	-2.76926	27.814	0	0	yes			Spry4	Spry4	Spry4	chr18:38586264-38601268	KSR	ETP	OK	23.976	45.9419	0.93822	-9.99376
											A330040F15Rik	0	0	0	0.159976	0	0.128905	0	0	0			Cpt1a	Cpt1a	Cpt1a	chr19:3323300-3385733	KSR	2i	OK	33.9227	53.8566	0.666873	-8.90006	0	0	yes			Kdelr3	Kdelr3	Kdelr3	chr15:79516407-79546741	KSR	ETP	OK	43.8288	82.6215	0.914639	-8.48123
											A330041J22Rik	0.0540548	0	0	0	0.0893167	0	0.0897903	0.0841437	0.0956844			Ctdsp2	Ctdsp2	Ctdsp2	chr10:126978716-126999975	KSR	2i	OK	34.0221	50.3199	0.564659	-11.5428	0	0	yes			Col4a2	Col4a2	Col4a2	chr8:11312828-11449287	KSR	ETP	OK	40.3815	74.5842	0.885174	-10.3949
											A330048O09Rik	0.481229	0.361036	0.9449	0.385472	0.520491	0.161352	0.130011	0.477127	0.537173			Ctnnd1	Ctnnd1	Ctnnd1	chr2:84600780-84650740	KSR	2i	OK	56.8526	47.9052	-0.247045	8.34374	0	0	yes			B4galt6	B4galt6	B4galt6	chr18:20684598-20746404	KSR	ETP	OK	26.2249	47.3769	0.853248	-9.5279
											A330049M08Rik	0.992511	1.10693	0.98796	0.466083	0.504031	0.456603	0.452533	0.617373	0.394437			Ctsl	Ctsl	Ctsl	chr13:64363213-64370306	KSR	2i	OK	264.021	168.519	-0.647745	9.98821	0	0	yes			Serpinh1	Serpinh1	Serpinh1	chr7:99345374-99353239	KSR	ETP	OK	94.1863	168.555	0.83963	-10.9177
											A330049N07Rik	0.667636	0.222931	0.586387	0.459864	0.201241	0.347289	0.518021	0.252504	0.747514			Cubn	Cubn	Cubn	chr2:13276337-13491876	KSR	2i	OK	8.35356	0.249813	-5.06347	17.2827	0	0	yes			Lrp2	Lrp2	Lrp2	chr2:69424334-69586067	KSR	ETP	OK	9.78735	17.1411	0.808472	-8.94114
											A330050B17Rik	0.117338	0.0922078	0.120543	0.150789	0.0398481	0.173329	0.0578727	0.0362409	0.102427			Dab2	Dab2	Dab2	chr15:6299788-6440709	KSR	2i	OK	21.1669	1.237	-4.09689	18.3248	0	0	yes			Lamb1	Lamb1	Lamb1	chr12:31265293-31329639	KSR	ETP	OK	53.2823	91.5783	0.781351	-9.37757
											A330050F15Rik	0	0.0352391	0	0	0	0	0.0773199	0.0352608	0.0783222			Dazl	Dazl	Dazl	chr17:50279393-50293599	KSR	2i	OK	77.001	36.2741	-1.08593	14.0822	0	0	yes			Lama1	Lama1	Lama1	chr17:67697264-67822645	KSR	ETP	OK	44.7692	74.7906	0.74035	-9.03977
											A330069E16Rik	66.7086	61.3542	53.8189	83.5708	59.1389	74.2919	61.6056	55.0711	59.7553			Dcdc2c	Dcdc2c	Dcdc2c	chr12:28437794-28548337	KSR	2i	OK	68.9413	20.8075	-1.72826	15.6994	0	0	yes			Klf4	Klf4	Klf4	chr4:55527136-55532475	KSR	ETP	OK	77.7221	129.534	0.736929	-8.60165
											A330070K13Rik	0	0.0991992	0	0	0	0	0	0	0			Ddit4	Ddit4	Ddit4	chr10:59949674-59951770	KSR	2i	OK	50.0098	27.3032	-0.873142	8.83226	0	0	yes			Col4a1	Col4a1	Col4a1	chr8:11198422-11312826	KSR	ETP	OK	76.6304	123.805	0.692086	-8.48398
											A330076C08Rik	0	0	0	0	0	0	0	0	0			Ddr2	Ddr2	Ddr2	chr1:169969408-170088944	KSR	2i	OK	6.53269	1.78216	-1.87405	12.9349	0	0	yes			Sirt1	Sirt1	Sirt1	chr10:63319004-63339035	KSR	ETP	OK	44.9442	68.0773	0.599037	-15.3587
											A330076H08Rik	0	0	0	0	0	0	0	0	0			Dnahc8	Dnahc8	Dnahc8	chr17:30626935-30875264	KSR	2i	OK	1.02953	4.09389	1.99149	-13.5832	0	0	yes			Senp3	Senp3	Senp3	chr11:69673109-69682084	KSR	ETP	OK	200.21	286.351	0.516272	-12.4439
											A330093E20Rik	0.36182	0.224527	0.205102	0.247651	0.269179	0.211338	0.0998173	0.186782	0.140619			Dnmt3a	Dnmt3a	Dnmt3a	chr12:3806979-3914443	KSR	2i	OK	22.685	11.4045	-0.992138	14.1645	0	0	yes			Smarcad1	Smarcad1	Smarcad1	chr6:65042666-65116049	KSR	ETP	OK	44.6194	59.7502	0.421271	-14.0596
											A330102I10Rik	0.958827	0.569235	0.522646	0.881514	0.612526	0.636968	0.452816	0.417115	0.110979			Dnmt3b	Dnmt3b	Dnmt3b	chr2:153649453-153687730	KSR	2i	OK	48.2943	34.6484	-0.479066	9.64992	0	0	yes			Jarid2	Jarid2	Jarid2	chr13:44730773-44921643	KSR	ETP	OK	86.354	113.382	0.392857	-13.0955
											A3galt2	0	0	0.0289431	0	0	0.0351619	0	0	0.0297037			Dnmt3l	Dnmt3l	Dnmt3l	chr10:78030030-78063615	KSR	2i	OK	163.19	101.271	-0.688329	9.56226	0	0	yes			Ncor1	Ncor1	Ncor1	chr11:62281472-62457332	KSR	ETP	OK	32.7493	41.4384	0.339506	-9.85462
											A430005L14Rik	31.0604	27.3328	31.7087	41.2491	43.6562	38.8841	35.031	35.4462	40.8199			Dub1	Dub1	Dub1	chr7:104857015-104862667	KSR	2i	OK	15.2743	4.11345	-1.89268	11.1561	0	0	yes			Dnmt3b	Dnmt3b	Dnmt3b	chr2:153649453-153687730	KSR	ETP	OK	48.9448	61.8114	0.336718	-8.53897
											A430033K04Rik	1.69781	2.11892	1.59835	1.42784	1.16678	1.16494	1.4162	1.57052	1.4863			Dub1a	Dub1a	Dub1a	chr7:104840311-104842504	KSR	2i	OK	23.5213	6.37107	-1.88436	10.2389	0	0	yes			Notum	Notum	Notum	chr11:120653788-120660837	KSR	ETP	OK	5.45356	15.8705	1.54107	-8.16327
											A430035B10Rik	0	0	0	0	0	0	0	0	0			Dusp4	Dusp4	Dusp4	chr8:34807609-34819894	KSR	2i	OK	7.73778	0.805865	-3.26331	8.61462	0	0	yes			Sparc	Sparc	Sparc	chr11:55394500-55420080	KSR	ETP	OK	311.692	493.384	0.662588	-8.20765
											A430071A18Rik	0.205735	0.207378	0.254436	0.120946	0.0834522	0.0975744	0.0762001	0	0.479328			Dusp6	Dusp6	Dusp6	chr10:99263230-99267489	KSR	2i	OK	36.1696	15.6219	-1.21121	12.1562	0	0	yes			Runx1	Runx1	Runx1	chr16:92601465-92826066	KSR	ETP	OK	1.75288	4.61141	1.39548	-8.09656
											A430078G23Rik	0.505541	0.713765	0.761329	1.06482	1.30319	1.15165	1.6528	1.70556	1.79168			Dynll2	Dynll2	Dynll2	chr11:87979524-87998298	KSR	2i	OK	59.663	83.4864	0.484703	-10.9674	0	0	yes			Mmp14	Mmp14	Mmp14	chr14:54431603-54441258	KSR	ETP	OK	14.3828	29.2077	1.02201	-8.05366
											A430084P05Rik	0	0	0	0	0	0	0	0	0			Egr1	Egr1	Egr1	chr18:34861206-34864956	KSR	2i	OK	10.8442	1.00094	-3.4375	11.5347	0	0	yes			Ccdc3	Ccdc3	Ccdc3	chr2:5137775-5230866	KSR	ETP	OK	10.338	21.9076	1.08347	-7.90806
											A430088P11Rik	0	0.0271023	0	0	0.0424586	0	0.0233598	0.0223728	0.0532265			Eif4g3	Eif4g3	Eif4g3	chr4:137993455-138207079	KSR	2i	OK	9.66084	4.10171	-1.23592	10.7972	0	0	yes			Fzd5	Fzd5	Fzd5	chr1:64730557-64737750	KSR	ETP	OK	20.5674	26.4602	0.363463	-7.86216
											A430089I19Rik	2.55211	1.73364	2.11491	0.541902	0.295242	0.570331	8.74334	7.24595	7.36886			Emb	Emb	Emb	chr13:117220572-117274415	KSR	2i	OK	31.9828	15.4816	-1.04674	10.1441	0	0	yes			Tet2	Tet2	Tet2	chr3:133463676-133544390	KSR	ETP	OK	12.3519	20.6782	0.743384	-7.84091
											A430089I19Rik	0.0516837	0.115453	0.0864552	0	0.0430208	0.0512596	0.547811	0.733229	0.479795			Epcam	Epcam	Epcam	chr17:87635978-87651127	KSR	2i	OK	60.6542	33.1052	-0.873548	9.75615	0	0	yes			2810417H13Rik	2810417H13Rik	2810417H13Rik	chr9:65828925-65908794	KSR	ETP	OK	15.2003	29.621	0.962516	-7.82861
											A430089I19Rik	0	0	0	0	0	0	0	0	0			Ephx2	Ephx2	Ephx2	chr14:66084376-66124500	KSR	2i	OK	7.07546	26.2033	1.88886	-12.9596	0	0	yes			Myc	Myc	Myc	chr15:61985340-61990361	KSR	ETP	OK	25.8977	41.083	0.665719	-7.82345
											A430089I19Rik	0	0	0	0	0	0	0	0	0			Fam25c	Fam25c	Fam25c	chr14:34351881-34355393	KSR	2i	OK	46.3656	112.917	1.28414	-9.03984	0	0	yes			Amn	Amn	Amn	chr12:111271110-111276426	KSR	ETP	OK	9.65269	24.3647	1.33579	-7.81609
											A430090L17Rik	0	0.0220724	0.0250498	0	0.025898	0	0	0	0			Fbp2	Fbp2	Fbp2	chr13:62836884-62858370	KSR	2i	OK	23.0051	7.80711	-1.55909	8.65061	0	0	yes			Jam3	Jam3	Jam3	chr9:27097383-27155421	KSR	ETP	OK	15.1773	30.9177	1.02651	-7.78594
											A430092G05Rik	0	0	0	0.0715613	0	0	0	0	0			Fbxo15	Fbxo15	Fbxo15	chr18:84935024-84981392	KSR	2i	OK	212.866	127.728	-0.736878	10.6857	0	0	yes			Cyp26a1	Cyp26a1	Cyp26a1	chr19:37697807-37701536	KSR	ETP	OK	2.4525	10.5073	2.09906	-7.75355
											A430093F15Rik	0	0	0	0	0	0	0	0	0.0469781			Flnc	Flnc	Flnc	chr6:29433152-29461888	KSR	2i	OK	5.39674	1.94762	-1.47038	10.3579	0	0	yes			Eml1	Eml1	Eml1	chr12:108410654-108702306	KSR	ETP	OK	0.747527	4.16492	2.47809	-7.74063
											A430105I19Rik	0.143011	0.0898896	0.149964	0.201236	0.0348234	0.0398529	0.120059	0.0629255	0.0529522			Flrt3	Flrt3	Flrt3	chr2:140395429-142390050	KSR	2i	OK	5.69848	1.17964	-2.27223	9.21296	0	0	yes			Pml	Pml	Pml	chr9:58217179-58249786	KSR	ETP	OK	22.1778	32.1003	0.533469	-7.68788
											A430107O13Rik	0.0434331	0.0828684	0.0182692	0.0261731	0.240649	0.128854	0.0916523	0.137762	0.0742795			Fn1	Fn1	Fn1	chr1:71585522-71653171	KSR	2i	OK	76.6958	123.469	0.686926	-10.8853	0	0	yes			Tmem181b-ps	Tmem181b-ps	Tmem181b-ps	chr17:6439001-6450994	KSR	ETP	OK	11.0603	20.2544	0.872842	-7.68233
											A430107P09Rik	0.37891	0.381078	0.449505	0.748257	0.611708	0.576019	0.583772	0.898958	0.813788			Fxyd6	Fxyd6	Fxyd6	chr9:45370184-45396159	KSR	2i	OK	30.4542	59.1013	0.956548	-10.0704	0	0	yes			Lrpap1	Lrpap1	Lrpap1	chr5:35091505-35105697	KSR	ETP	OK	60.9568	97.4242	0.676494	-7.67617
											A430110N23Rik	0.128069	0.250905	0.128918	0.218453	0.130406	0.0571332	0.122572	0.270792	0.209339			Gata4	Gata4	Gata4	chr14:63198914-63245260	KSR	2i	OK	11.7837	0.733702	-4.00546	12.4027	0	0	yes			Gjb3	Gjb3	Gjb3	chr4:127325234-127330836	KSR	ETP	OK	41.7053	65.2434	0.645601	-7.65878
											A4galt	4.2709	4.87041	4.33898	1.75032	1.78149	1.66383	3.50783	3.73405	4.48202			Gata6	Gata6	Gata6	chr18:11052509-11085635	KSR	2i	OK	14.8735	1.1496	-3.69354	13.4914	0	0	yes			Fam25c	Fam25c	Fam25c	chr14:34351881-34355393	KSR	ETP	OK	47.0945	107.749	1.19404	-7.65148
											A4gnt	0.0364667	0	0	0	0	0	0.0305721	0	0.0309789			Gja1	Gja1	Gja1	chr10:56377299-56390419	KSR	2i	OK	73.053	29.1785	-1.32404	16.8252	0	0	yes			Gbx2	Gbx2	Gbx2	chr1:89927961-89931176	KSR	ETP	OK	16.8429	33.6929	1.00031	-7.64265
											A530006G24Rik	0	0	0	0	0	0	0	0	0			Glipr2	Glipr2	Glipr2	chr4:43957701-43979118	KSR	2i	OK	50.6964	18.6283	-1.44439	14.0102	0	0	yes			Bahcc1	Bahcc1	Bahcc1	chr11:120232946-120292297	KSR	ETP	OK	1.31957	3.30685	1.32539	-7.54571
											A530013C23Rik	0	0	0	0	0	0	0	0	0.000175938			Glo1	Glo1	Glo1	chr17:30592861-30612659	KSR	2i	OK	199.509	291.009	0.544614	-12.2195	0	0	yes			Trib1	Trib1	Trib1	chr15:59648653-59657099	KSR	ETP	OK	9.86825	18.7929	0.929323	-7.50382
											A530016L24Rik	0	0	0	0	0	0	0	0	0			Glul	Glul	Glul	chr1:153899944-153909714	KSR	2i	OK	114.575	60.6592	-0.917495	12.9563	0	0	yes			Atp2a3	Atp2a3	Atp2a3	chr11:72961168-72993043	KSR	ETP	OK	6.84765	11.968	0.805501	-7.50448
											A530032D15Rik	0.205812	0.299835	0.238868	0.0668338	0.00664041	0.0167676	0.752991	0.918583	0.592767			Gm10845	Gm10845	Gm10845	chr14:79860520-79869176	KSR	2i	OK	28.3415	9.35827	-1.59861	14.6472	0	0	yes			F2r	F2r	F2r	chr13:95601788-95618433	KSR	ETP	OK	35.7266	58.2531	0.705336	-7.46157
											A530046M15	0	0	0	0	0	0	0	0.0500371	0			Gm11127	Gm11127	Gm11127	chr17:36042960-36058645	KSR	2i	OK	15.6443	2.48635	-2.65354	9.29939	0	0	yes			Smad7	Smad7	Smad7	chr18:75367364-75395934	KSR	ETP	OK	17.5769	30.1439	0.778182	-7.40668
											A530050N04Rik	2.53417e-05	0	0	3.14672e-05	0.0443676	9.20599e-05	0.0833961	0	3.69535e-05			Gm19757	Gm19757	Gm19757	chr6:105481265-105492668	KSR	2i	OK	7.58858	1.66468	-2.18858	9.14506	0	0	yes			Clic6	Clic6	Clic6	chr16:92498146-92541241	KSR	ETP	OK	1.02279	4.35129	2.08894	-7.40508
											A530053G22Rik	0	0	0	0	0	0	0	0	0			Gm2016	Gm2016	Gm2016	chr12:87874071-87877859	KSR	2i	OK	48.9141	14.219	-1.78243	15.2977	0	0	yes			Car2	Car2	Car2	chr3:14886425-14900770	KSR	ETP	OK	66.5724	108.156	0.700115	-7.39655
											A530054K11Rik	2.21951	3.17551	2.35181	3.00566	2.924	3.05925	2.87247	2.54318	1.98706			Gm2022	Gm2022	Gm2022	chr12:87892833-87896722	KSR	2i	OK	46.2684	12.69	-1.86633	15.5845	0	0	yes			Ppp2r5a	Ppp2r5a	Ppp2r5a	chr1:191325964-191397041	KSR	ETP	OK	45.1506	72.0128	0.673506	-7.32058
											A530058N18Rik	0	0	0	0	0	0	0	0	0			Gm3002	Gm3002	Gm3002	chr14:3814912-3830681	KSR	2i	OK	8.71911	3.83867	-1.18357	8.87813	0	0	yes			Tub	Tub	Tub	chr7:109010879-109083324	KSR	ETP	OK	1.13301	3.43939	1.60199	-7.29831
											A530064D06Rik	0.238787	0.174204	0.161734	0	0	0	0.3435	0.247856	0.307146			Gm3500	Gm3500	Gm3500	chr14:5718333-5741602	KSR	2i	OK	16.4588	5.81072	-1.50207	9.26102	0	0	yes			Fam69a	Fam69a	Fam69a	chr5:107900527-107987077	KSR	ETP	OK	21.0751	36.4258	0.789421	-7.22382
											A530065N20	0	0.0188124	0.0212484	0	0.021907	0.0258681	0	0.0197523	0			Gm4340	Gm4340	Gm4340	chr10:104142986-104188000	KSR	2i	OK	185.119	91.6128	-1.01483	17.6121	0	0	yes			Ak4	Ak4	Ak4	chr4:101419288-101467771	KSR	ETP	OK	33.3602	50.8338	0.60766	-7.19302
											A530072M11Rik	0.0980152	0.0362415	0.0386309	0.12048	0.123975	0.101684	0.0795574	0.0354543	0.167628			Gm5039	Gm5039	Gm5039	chr12:88320121-88321762	KSR	2i	OK	25.8579	8.91252	-1.5367	10.3217	0	0	yes			Sfpq	Sfpq	Sfpq	chr4:127021300-127037014	KSR	ETP	OK	153.202	186.602	0.284534	-7.17809
											A530088E08Rik	0.0609732	0	0	0	0	0	0	0.0433605	0.0503651			Gm5506	Gm5506	Gm5506	chr4:150237196-150248873	KSR	2i	OK	492.832	675.366	0.454574	-8.46306	0	0	yes			Epha4	Epha4	Epha4	chr1:77367184-77515088	KSR	ETP	OK	14.0304	22.9757	0.711548	-7.11669
											A530098C11Rik	0	0	0.0722356	0	0	0	0	0	0			Gm5662	Gm5662	Gm5662	chr12:88270634-88274497	KSR	2i	OK	46.3085	12.9657	-1.83658	15.4782	0	0	yes			Adora1	Adora1	Adora1	chr1:134193447-134235431	KSR	ETP	OK	0.698336	2.883	2.04558	-7.04839
											A530099J19Rik	0	0	0	0	0	0	0	0	0			Gm7102	Gm7102	Gm7102	chr19:61174685-61176309	KSR	2i	OK	98.3281	29.5622	-1.73385	18.5895	0	0	yes			Cd84	Cd84	Cd84	chr1:171839696-171890718	KSR	ETP	OK	24.1118	39.4736	0.711151	-7.02201
											A630001G21Rik	0	0.0382345	0	0.178791	0.256768	0.457321	0.294609	0.18998	0.256464			Gm8300	Gm8300	Gm8300	chr12:87514315-87518265	KSR	2i	OK	46.3762	12.9312	-1.84253	15.6597	0	0	yes			Spock1	Spock1	Spock1	chr13:57421194-57908332	KSR	ETP	OK	2.1124	5.4926	1.3786	-6.98912
											A630007B06Rik	3.51165	4.41949	4.05712	4.32656	5.66883	4.33698	5.74481	4.79089	4.62021			Gm8994	Gm8994	Gm8994	chr6:136327538-136329983	KSR	2i	OK	45.0397	19.5828	-1.20161	10.6083	0	0	yes			Fbp2	Fbp2	Fbp2	chr13:62836884-62858370	KSR	ETP	OK	23.3224	44.471	0.931144	-6.97955
											A630010A05Rik	0.06142	0	0	0	0	0	0	0	0			Gpx3	Gpx3	Gpx3	chr11:54902853-54910382	KSR	2i	OK	44.351	11.5943	-1.93554	14.1577	0	0	yes			Pth1r	Pth1r	Pth1r	chr9:110722084-110747145	KSR	ETP	OK	8.4544	17.1442	1.01995	-6.97555
											A630012P03Rik	0	0	0	0	0	0	0	0	0			Grb10	Grb10	Grb10	chr11:11930498-12037420	KSR	2i	OK	31.7936	21.9313	-0.535741	9.45634	0	0	yes			Scd1	Scd1	Scd1	chr19:44394449-44407709	KSR	ETP	OK	11.6484	19.8517	0.769132	-6.96414
											A630019I02Rik	0	0.087462	0	0.0463639	0	0.0388033	0.15969	0.0574034	0.0331116			Grn	Grn	Grn	chr11:102430321-102436809	KSR	2i	OK	46.0109	73.1907	0.669684	-8.32223	0	0	yes			Epha2	Epha2	Epha2	chr4:141301220-141329384	KSR	ETP	OK	34.3174	53.8164	0.649106	-6.92924
											A630020A06	0.285602	0.208173	0.316896	0.459139	0.436235	0.467156	0.317774	0.435256	0.267724			Grsf1	Grsf1	Grsf1	chr5:88659236-88676171	KSR	2i	OK	45.3139	74.2438	0.712315	-10.3295	0	0	yes			Pqlc1	Pqlc1	Pqlc1	chr18:80255244-80292724	KSR	ETP	OK	7.30586	15.5173	1.08675	-6.92215
											A630023A22Rik	0	0	0	0	0	0	0	0	0			Gsn	Gsn	Gsn	chr2:35256358-35307902	KSR	2i	OK	11.9728	1.82207	-2.71612	10.9117	0	0	yes			Hopx	Hopx	Hopx	chr5:77086985-77115123	KSR	ETP	OK	7.81381	21.1776	1.43844	-6.91921
											A630033H20Rik	0	0	0	0	0	0	0	0	0			Gsto1	Gsto1	Gsto1	chr19:47854988-47864788	KSR	2i	OK	39.0704	17.1674	-1.18641	8.58839	0	0	yes			Egflam	Egflam	Egflam	chr15:7206119-7398304	KSR	ETP	OK	0.567651	2.7164	2.25862	-6.90554
											A630055G03Rik	11.0361	11.9345	11.3546	13.4159	8.41863	10.7998	11.7545	12.2365	9.64889			H19	H19	H19	chr7:142575531-142578146	KSR	2i	OK	41.6719	1.05466	-5.30423	17.7644	0	0	yes			A830080D01Rik	A830080D01Rik	A830080D01Rik	chrX:159532667-159593081	KSR	ETP	OK	23.352	37.775	0.693886	-6.85321
											A630066F11Rik	0.090903	0.399822	0.602351	1.08136	0.522612	0.796039	0.424511	0.414004	0.500221			Hspb8	Hspb8	Hspb8	chr5:116408494-116422864	KSR	2i	OK	11.5917	27.7752	1.26071	-9.54468	0	0	yes			Slc7a6	Slc7a6	Slc7a6	chr8:106168874-106198704	KSR	ETP	OK	21.7288	35.1208	0.692713	-6.83299
											A630072M18Rik	0.645475	0.705849	0.833201	1.03483	1.06763	1.12225	1.1818	0.77883	1.03327			Hspg2	Hspg2	Hspg2	chr4:137468802-137570630	KSR	2i	OK	23.9836	13.0977	-0.872732	12.1822	0	0	yes			Ctsl	Ctsl	Ctsl	chr13:64363213-64370306	KSR	ETP	OK	267.563	391.234	0.548154	-6.83095
											A630073D07Rik	0	0	0	0	0	0	0	0	0			Htra1	Htra1	Htra1	chr7:130936202-130985658	KSR	2i	OK	64.5992	25.467	-1.34289	14.02	0	0	yes			Plbd1	Plbd1	Plbd1	chr6:136612070-136661893	KSR	ETP	OK	3.07518	9.19454	1.58011	-6.77194
											A630075F10Rik	0.29695	0.178175	0.281368	0.293598	0.353008	0.276466	0.341486	0.240717	0.200143			Igf2	Igf2	Igf2	chr7:142650767-142670356	KSR	2i	OK	15.0984	0.623676	-4.59745	13.7093	0	0	yes			Nup62cl	Nup62cl	Nup62cl	chrX:140007672-140062568	KSR	ETP	OK	64.9163	104.997	0.693702	-6.72188
											A630076J17Rik	0	0	0	0	0	0	0	0	0			Itga3	Itga3	Itga3	chr11:95044481-95076714	KSR	2i	OK	25.8905	12.4386	-1.05761	11.422	0	0	yes			Bend5	Bend5	Bend5	chr4:110397790-111657510	KSR	ETP	OK	4.56413	11.4874	1.33163	-6.69412
											A630077J23Rik	0	0	0	0	0	0	0	0	0			Jarid2	Jarid2	Jarid2	chr13:44730773-44921643	KSR	2i	OK	85.1918	56.0557	-0.603855	21.111	0	0	yes			Asz1	Asz1	Asz1	chr6:18050963-18109061	KSR	ETP	OK	17.5871	32.4018	0.881558	-6.69343
											A630089N07Rik	30.3076	33.2874	25.1519	15.2405	17.1188	16.8892	35.6494	40.0929	32.8634			Jub	Jub	Jub	chr14:54567468-54577661	KSR	2i	OK	44.5246	26.0752	-0.771923	9.27001	0	0	yes			Hes1	Hes1	Hes1	chr16:30065356-30067796	KSR	ETP	OK	29.6815	53.1295	0.839952	-6.69308
											A630095E13Rik	0.164176	0	0	0	0	0	0	0	0.131412			Kank2	Kank2	Kank2	chr9:21766772-21798546	KSR	2i	OK	14.6365	25.4539	0.798314	-8.99634	0	0	yes			Tmem181c-ps	Tmem181c-ps	Tmem181c-ps	chr17:6610102-6620925	KSR	ETP	OK	9.39879	16.726	0.831543	-6.65004
											A630095N17Rik	0	0.649181	0.82716	0	0.137875	0.168791	0.131247	0.117809	0.140989			Klf2	Klf2	Klf2	chr8:72319061-72321654	KSR	2i	OK	53.2884	96.8527	0.861971	-10.2887	0	0	yes			Htra1	Htra1	Htra1	chr7:130936202-130985658	KSR	ETP	OK	65.3475	100.661	0.623299	-6.59681
											A730008H23Rik	8.7356	8.83022	9.30471	5.73927	6.91477	6.30376	8.37068	7.90813	6.92469			Krt18	Krt18	Krt18	chr15:102028215-102032026	KSR	2i	OK	35.6784	2.60936	-3.77328	14.2273	0	0	yes			Rnf7	Rnf7	Rnf7	chr9:96470956-96478595	KSR	ETP	OK	146.519	219.511	0.583207	-6.57989
											A730011L01Rik	1.39989	1.3015	1.3338	1.33105	1.46176	1.55967	1.44387	1.22926	1.4363			Krt8	Krt8	Krt8	chr15:101996710-102004342	KSR	2i	OK	53.7896	7.88184	-2.77072	19.2166	0	0	yes			Suz12	Suz12	Suz12	chr11:79993105-80034123	KSR	ETP	OK	84.9998	106.414	0.324151	-6.58002
											A730015I17	0.00373179	0.0383047	0.0488049	0.0614574	0.178486	0.0516166	0.00747608	3.23304e-06	0.000139597			LOC639910	LOC639910	LOC639910	chr13:120140246-120155335	KSR	2i	OK	48.7844	18.1588	-1.42575	12.1567	0	0	yes			Nde1	Nde1	Nde1	chr16:14163274-14192923	KSR	ETP	OK	45.2034	64.4469	0.511681	-6.56807
											A730017C20Rik	0.316847	0.0446537	0	0.0747925	0.205558	0.276442	0.257996	0.199601	0.391011			Lama1	Lama1	Lama1	chr17:67697264-67822645	KSR	2i	OK	44.2191	8.6347	-2.35645	29.7078	0	0	yes			Amd1	Amd1,Amd2	Amd1,Amd2	chr10:40287457-40302188	KSR	ETP	OK	0.489491	15.8963	5.02126	-6.53535
											A730017L22Rik	2.45463	2.37525	2.25386	1.66564	1.64646	2.0251	1.96387	2.34735	2.69225			Lamb1	Lamb1	Lamb1	chr12:31265293-31329639	KSR	2i	OK	52.5818	8.59089	-2.61368	29.0236	0	0	yes			Ppp1r10	Ppp1r10	Ppp1r10	chr17:35916910-35932283	KSR	ETP	OK	18.3454	24.9531	0.443806	-6.43821
											A730018C14Rik	0	0	0	0	0	0	0	0	0			Lars2	Lars2	Lars2	chr9:123366939-123462664	KSR	2i	OK	827.095	457.935	-0.85291	12.9679	0	0	yes			Ccar1	Ccar1	Ccar1	chr10:62743927-62792368	KSR	ETP	OK	31.3925	47.2853	0.590973	-6.43752
											A730020E08Rik	0.308764	0.400511	0.268523	0.594032	0.378219	0.354621	0.156382	0.25469	0.282786			Lgmn	Lgmn	Lgmn	chr12:102394097-102439697	KSR	2i	OK	57.8503	33.2041	-0.800963	8.72671	0	0	yes			Ntn1	Ntn1	Ntn1	chr11:68209363-68386826	KSR	ETP	OK	4.45757	8.40967	0.915793	-6.43591
											A730020M07Rik	0.0446681	0	0	0.12048	0.0363423	0.70773	0.0343055	0	0			Lrp2	Lrp2	Lrp2	chr2:69424334-69586067	KSR	2i	OK	9.67207	1.84272	-2.39199	21.6827	0	0	yes			Mapt	Mapt	Mapt	chr11:104231435-104332093	KSR	ETP	OK	3.3589	6.68844	0.993681	-6.43264
											A730036I17Rik	0.352698	0.220495	0.196531	0.144048	0.175744	0.291314	0.247098	0.321052	0.381706			Lrpap1	Lrpap1	Lrpap1	chr5:35091505-35105697	KSR	2i	OK	60.1647	29.2366	-1.04114	12.6494	0	0	yes			2810030E01Rik	2810030E01Rik	2810030E01Rik	chr2:18044086-18048449	KSR	ETP	OK	1.28328	3.80952	1.56978	-6.4215
											A730037C10Rik	0.251643	0.20216	0.105325	0.627428	0.466906	0.32515	0.629743	0.448623	0.451546			Lrrc34	Lrrc34	Lrrc34	chr3:30624266-30672431	KSR	2i	OK	16.5122	37.2568	1.17397	-10.2167	0	0	yes			Elavl3	Elavl3	Elavl3	chr9:22015004-22052023	KSR	ETP	OK	1.60844	4.08768	1.34562	-6.34366
											A730043L09	0	0	0	0	0	0	0	0	0			Ly75	Ly75	Ly75	chr2:60293759-60383231	KSR	2i	OK	10.0404	21.4946	1.09816	-11.3443	0	0	yes			Cisd3	Cisd3	Cisd3	chr11:97685951-97688625	KSR	ETP	OK	56.5992	95.9879	0.762071	-6.3372
											A730046J19Rik	0.0674651	0.0894923	0.11516	0.223697	0.254143	0.221532	0.205733	0.158097	0.241359			Mael	Mael	Mael	chr1:166201384-166238744	KSR	2i	OK	39.1129	13.0399	-1.58471	12.164	0	0	yes			Col13a1	Col13a1	Col13a1	chr10:61838497-61979108	KSR	ETP	OK	1.91271	5.71408	1.5789	-6.32223
											A730056A06Rik	0	0	0	0	0	0	0	0.0266925	0			Mageb4	Mageb4	Mageb4	chrX:86250255-86256219	KSR	2i	OK	10.4395	2.9834	-1.80703	8.78071	0	0	yes			Tpbg	Tpbg	Tpbg	chr9:85842379-85847055	KSR	ETP	OK	4.2554	8.62254	1.01882	-6.30938
											A730082K24Rik	0.295051	0.157164	0.203899	0	0.0423706	0.105936	0.0421291	0.168333	0.0441251			Mcf2	Mcf2	Mcf2	chrX:60055955-60147643	KSR	2i	OK	5.11848	12.2401	1.25783	-8.96461	0	0	yes			Gm4980	Gm4980	Gm4980	chr7:99624066-99627103	KSR	ETP	OK	1.31461	4.68503	1.83343	-6.29227
											A730085A09Rik	2.17821	1.93361	1.55655	2.87803	2.28081	3.66683	2.92982	3.10892	3.10292			Mgea5	Mgea5	Mgea5	chr19:45750258-45783291	KSR	2i	OK	19.9977	32.6965	0.7093	-8.68547	0	0	yes			Acsl4	Acsl4	Acsl4	chrX:142317992-142390535	KSR	ETP	OK	10.0829	14.9333	0.566622	-6.23142
											A730085K08Rik	0	0	0	0	0	0	0	0	0			Mov10	Mov10	Mov10	chr3:104794833-104818563	KSR	2i	OK	33.7792	51.097	0.597103	-9.44281	0	0	yes			Kirrel	Kirrel	Kirrel	chr3:87078591-87174747	KSR	ETP	OK	8.2266	11.8371	0.524946	-6.20482
											A730090H04Rik	0.12797	0.130745	0.107818	0	0.153683	0.185194	0.104144	0.0495567	0.488039			Mt2	Mt2	Mt2	chr8:94172617-94173567	KSR	2i	OK	521.853	268.711	-0.957588	12.9336	0	0	yes			Nostrin	Nostrin	Nostrin	chr2:69135799-69189329	KSR	ETP	OK	8.67609	17.9579	1.0495	-6.20289
											A730090N16Rik	0.0724443	0.11122	0	0.0898867	0.182146	0.0777138	0.0583237	0.108081	0.186458			Myc	Myc	Myc	chr15:61985340-61990361	KSR	2i	OK	25.5856	11.4618	-1.1585	10.2264	0	0	yes			Scd2	Scd2	Scd2	chr19:44293675-44306862	KSR	ETP	OK	52.0572	74.6258	0.519577	-6.1907
											A730098P11Rik	2.39899	2.85137	2.73625	3.17126	2.52037	2.99764	2.727	2.64763	2.85815			Myo7a	Myo7a	Myo7a	chr7:98051053-98119493	KSR	2i	OK	2.66587	0.185938	-3.84171	8.32179	0	0	yes			Tmem20	Tmem20	Tmem20	chr19:38395979-38405607	KSR	ETP	OK	22.1632	34.3522	0.632241	-6.18311
											A830007P12Rik	26.7126	27.2384	24.0407	39.8657	27.4384	31.7056	27.5826	26.1052	25.8402			Ncoa4	Ncoa4	Ncoa4	chr14:32159891-32179363	KSR	2i	OK	66.5925	51.2656	-0.377369	8.54094	0	0	yes			Hnrnpa2b1	Hnrnpa2b1	Hnrnpa2b1	chr6:51460434-51469894	KSR	ETP	OK	537.342	655.315	0.286348	-6.15193
											A830009L08Rik	0	0	0	0	0	0	0	0	0			Nefl	Nefl	Nefl	chr14:68083883-68087737	KSR	2i	OK	7.48295	20.909	1.48245	-9.65217	0	0	yes			Cited1	Cited1	Cited1	chrX:102247439-102251769	KSR	ETP	OK	3.58113	13.1167	1.87292	-6.0397
											A830010M20Rik	0.500292	0.465214	0.318877	0.679341	0.658377	0.622592	0.555284	0.711435	0.838338			Nefm	Nefm	Nefm	chr14:68119544-68131371	KSR	2i	OK	2.03526	8.87432	2.12442	-10.3373	0	0	yes			Fgf10	Fgf10	Fgf10	chr13:118714698-118792573	KSR	ETP	OK	1.59737	4.00486	1.32605	-6.0021
											A830018L16Rik	0.562547	0.510946	0.489832	0.210785	0.382608	0.332142	0.41128	0.47327	0.505438			Nipsnap1	Nipsnap1	Nipsnap1	chr11:4874002-4894200	KSR	2i	OK	40.9751	71.0018	0.793106	-9.22908	0	0	yes			Dyrk3	Dyrk3	Dyrk3	chr1:131128440-131138234	KSR	ETP	OK	39.6977	61.176	0.62391	-5.98845
											A830019L24Rik	0	0	0	0	0	0	0	0	0			Npl	Npl	Npl	chr1:153503015-153549714	KSR	2i	OK	27.6473	9.09204	-1.60446	10.0865	0	0	yes			Etnk1	Etnk1	Etnk1	chr6:143167229-143208547	KSR	ETP	OK	44.9448	63.5165	0.498976	-5.932
											A830052D11Rik	0.398834	0.884763	0.406858	1.00709	0.576871	1.02223	0.855928	1.04336	1.06403			Ntn1	Ntn1	Ntn1	chr11:68209363-68386826	KSR	2i	OK	4.39983	13.4399	1.61101	-13.3439	0	0	yes			Gjb4	Gjb4	Gjb4	chr4:127351085-127354081	KSR	ETP	OK	3.88718	10.5803	1.44459	-5.93112
											A830060N17	0	0	0	0.0604744	0.127772	0.0488121	0	0.0756794	0.0838751			Nup62cl	Nup62cl	Nup62cl	chrX:140007672-140062568	KSR	2i	OK	64.1756	31.5085	-1.02628	9.47641	0	0	yes			E130012A19Rik	E130012A19Rik	E130012A19Rik	chr11:97627386-97629716	KSR	ETP	OK	168.562	237.075	0.492065	-5.91663
											A830080D01Rik	17.437	19.6391	19.0785	30.3407	28.021	30.9903	18.7928	17.5749	18.2424			Nxf7	Nxf7	Nxf7	chrX:135579786-135593855	KSR	2i	OK	14.2657	1.25606	-3.50557	10.5917	0	0	yes			Fam167a	Fam167a	Fam167a	chr14:63436393-63465502	KSR	ETP	OK	0.957898	2.98275	1.6387	-5.90539
											A830082K12Rik	0.119452	0.0624423	0.0678066	0.0974526	0.0340747	0.0425865	0.0994811	0.0921083	0.0698678			P4ha1	P4ha1	P4ha1	chr10:59323295-59373304	KSR	2i	OK	10.7544	3.95999	-1.44136	9.85159	0	0	yes			Rcn1	Rcn1	Rcn1	chr2:105385947-105399319	KSR	ETP	OK	60.7648	86.9698	0.517278	-5.89067
											A830082N09Rik	0.210571	0.139761	0.161773	0.298838	0.21171	0.258109	0.198575	0.207565	0.13404			P4ha2	P4ha2	P4ha2	chr11:54100923-54131667	KSR	2i	OK	24.6132	2.74307	-3.16557	15.3996	0	0	yes			Eps8	Eps8	Eps8	chr6:137477244-137649120	KSR	ETP	OK	12.6834	20.1013	0.664351	-5.88986
											A830093I24Rik	0.278213	0.284301	0.350588	0.289352	0.729959	0.68598	0.465366	0.316509	0.505582			Pdgfra	Pdgfra	Pdgfra	chr5:75152290-75198204	KSR	2i	OK	7.63395	0.882964	-3.112	14.497	0	0	yes			Itpk1	Itpk1	Itpk1	chr12:102568582-102704869	KSR	ETP	OK	61.0418	87.9564	0.526992	-5.87942
											A930001A20Rik	0	0	0	0.0879327	0.0498967	0	0	0	0.0604672			Peg10	Peg10	Peg10	chr6:4747305-4760516	KSR	2i	OK	154.398	30.0292	-2.36222	35.3333	0	0	yes			BC032203	BC032203	BC032203	chr17:46798115-46831413	KSR	ETP	OK	11.1004	17.0563	0.619692	-5.81325
											A930001C03Rik	0.391572	0.354912	0.439596	0.47127	0.439614	0.387187	0.404001	0.276105	0.161259			Phlda1	Phlda1	Phlda1	chr10:111506285-111508649	KSR	2i	OK	15.5839	4.01186	-1.95771	9.46561	0	0	yes			Gata2	Gata2	Gata2	chr6:88198663-88207032	KSR	ETP	OK	0.746133	3.21754	2.10845	-5.7805
											A930001N09Rik	2.08256	2.34295	2.19248	2.73237	2.48225	2.4771	2.6769	2.52756	2.52548			Piwil2	Piwil2	Piwil2	chr14:70372479-70429094	KSR	2i	OK	9.91797	3.86272	-1.36043	9.96781	0	0	yes			Aard	Aard	Aard	chr15:52040106-52045722	KSR	ETP	OK	36.1709	57.6578	0.672686	-5.77794
											A930003A15Rik	0	0	0	0	0	0	0	0	0			Plagl1	Plagl1	Plagl1	chr10:13090787-13131695	KSR	2i	OK	1.18648	4.11571	1.79446	-8.35748	0	0	yes			Tdh	Tdh	Tdh	chr14:63492346-63509092	KSR	ETP	OK	169.119	235.749	0.479214	-5.75762
											A930003O13Rik	0	0	0	0	0	0.0624199	0	0	0			Plaur	Plaur	Plaur	chr7:24462499-24475873	KSR	2i	OK	21.9378	5.98759	-1.87337	9.46099	0	0	yes			Bmp4	Bmp4	Bmp4	chr14:46379523-46390599	KSR	ETP	OK	30.176	47.1211	0.642973	-5.75433
											A930004D18Rik	1.88841	2.24985	1.77073	2.86325	3.05211	2.94581	1.39191	1.36392	1.27252			Plk2	Plk2	Plk2	chr13:110395043-110400843	KSR	2i	OK	33.6909	14.4662	-1.21968	11.8006	0	0	yes			Atp4a	Atp4a	Atp4a	chr7:30712231-30725534	KSR	ETP	OK	0.177875	2.71695	3.93305	-5.74226
											A930005H10Rik	3.43998	5.83099	5.12117	3.83079	4.37393	3.50208	6.13991	5.75972	4.7428			Plod2	Plod2	Plod2	chr9:92538800-92608427	KSR	2i	OK	33.8485	13.9818	-1.27554	16.1234	0	0	yes			Zic3	Zic3	Zic3	chrX:58030627-58036630	KSR	ETP	OK	35.058	50.734	0.533209	-5.70882
											A930005I04Rik	0.140289	0.130293	0.0761245	0.0572401	0	0.0890339	0.110803	0.10262	0.0389222			Pmaip1	Pmaip1	Pmaip1	chr18:66458603-66465558	KSR	2i	OK	21.4448	9.5203	-1.17155	9.64668	0	0	yes			Clic5	Clic5	Clic5	chr17:44188571-44280168	KSR	ETP	OK	0.651937	2.02224	1.63315	-5.70357
											A930006I01Rik	0	0	0	0	0	0.0507574	0	0	0			Pnp	Pnp	Pnp	chr14:50944302-50953412	KSR	2i	OK	60.3355	37.8692	-0.67198	8.60225	0	0	yes			Crabp1	Crabp1	Crabp1	chr9:54764807-54773109	KSR	ETP	OK	17.4478	35.7587	1.03525	-5.7038
											A930007I19Rik	0.0932005	0.0344436	0	0.0560512	0.0773495	0.0941918	0.0357077	0.100887	0.0393631			Podxl	Podxl	Podxl	chr6:31519492-31563937	KSR	2i	OK	10.839	2.06074	-2.395	14.7488	0	0	yes			Cabp1	Cabp1	Cabp1	chr5:115168690-115186121	KSR	ETP	OK	16.1221	30.5336	0.921353	-5.69705
											A930009A15Rik	0	0	0	0	0	0	0	0	0			Pramel7	Pramel7	Pramel7	chr2:87489087-87492418	KSR	2i	OK	9.24999	0.939629	-3.29929	8.60908	0	0	yes			Mmrn2	Mmrn2	Mmrn2	chr14:34375503-34404286	KSR	ETP	OK	8.54854	14.3241	0.744699	-5.67055
											A930011G23Rik	0	0.0500068	0	0	0	0	0	0.0259164	0.0288128			Pth1r	Pth1r	Pth1r	chr9:110722084-110747145	KSR	2i	OK	8.35092	0.617003	-3.75859	8.29613	0	0	yes			Dcaf12l1	Dcaf12l1	Dcaf12l1	chrX:44786566-44790197	KSR	ETP	OK	8.84358	14.5625	0.719556	-5.65055
											A930011O12Rik	0.706552	0.699968	0.62493	0.881189	1.43179	1.19277	0.614031	0.716523	0.721405			Pxdn	Pxdn	Pxdn	chr12:29938035-30017658	KSR	2i	OK	5.71534	1.44416	-1.98461	10.9736	0	0	yes			P4ha1	P4ha1	P4ha1	chr10:59323295-59373304	KSR	ETP	OK	10.8836	17.4156	0.678225	-5.63879
											A930012L18Rik	0.0471512	0.0353706	0.0799121	0	0.0385615	0	0	0.0352618	0.0399813			Rbpj	Rbpj	Rbpj	chr5:53555778-53657445	KSR	2i	OK	91.292	62.805	-0.539609	10.1364	0	0	yes			Plcb3	Plcb3	Plcb3	chr19:6953712-6969752	KSR	ETP	OK	53.4347	75.0061	0.489231	-5.63762
											A930013F10Rik	0.641409	0.357083	0.60313	0.34702	0.610857	0.333419	0.350956	0.522518	0.564858			Renbp	Renbp	Renbp	chrX:73922120-73930850	KSR	2i	OK	32.4504	57.1797	0.81727	-9.17537	0	0	yes			Ubtf	Ubtf	Ubtf	chr11:102304559-102319096	KSR	ETP	OK	62.025	74.8512	0.271174	-5.63365
											A930015D03Rik	1.57948	1.98001	2.08265	2.51547	1.31592	1.96099	2.75716	2.97437	2.01136			Rhox13	Rhox13	Rhox13	chrX:38120839-38129966	KSR	2i	OK	38.9888	16.9654	-1.20047	8.79097	0	0	yes			Glb1l2	Glb1l2	Glb1l2	chr9:26763043-26806417	KSR	ETP	OK	1.32833	3.62252	1.44738	-5.61472
											A930017M01Rik	0	0	0.0518135	0	0	0	0	0	0			Rn45s	Rn45s	Rn45s	chr17:39842996-39848829	KSR	2i	OK	1552.45	428.743	-1.85636	25.8005	0	0	yes			Jam2	Jam2	Jam2	chr16:84774122-84826375	KSR	ETP	OK	54.4618	75.5555	0.472292	-5.60253
											A930018P22Rik	0	0	0	0	0	0	0.178547	0	0			Rnft2	Rnft2	Rnft2	chr5:118190735-118245025	KSR	2i	OK	15.5166	2.39409	-2.69626	16.7871	0	0	yes			Obfc2a	Obfc2a	Obfc2a	chr1:51469487-51478399	KSR	ETP	OK	26.7229	39.8418	0.576204	-5.5784
											A930019D19Rik	0	0.0762175	0	0	0	0	0	0	0			S100a6	S100a6	S100a6	chr3:90612893-90614414	KSR	2i	OK	46.7084	6.10567	-2.93546	11.86	0	0	yes			Egr1	Egr1	Egr1	chr18:34861206-34864956	KSR	ETP	OK	10.9851	18.3745	0.742164	-5.57474
											A930024E05Rik	0.0555242	0.499502	0.280978	0.502351	0.239928	0.404694	0.551134	0.565027	0.829622			Scd2	Scd2	Scd2	chr19:44293675-44306862	KSR	2i	OK	51.3194	92.1695	0.844784	-12.6956	0	0	yes			Dlgap3	Dlgap3	Dlgap3	chr4:127169270-127237022	KSR	ETP	OK	10.0741	16.7925	0.737167	-5.54718
											A930038C07Rik	0.0218027	0	0.0181703	0.0797855	0.0543032	0.0663376	0.0357945	0.0335493	0.0742139			Sdc4	Sdc4	Sdc4	chr2:164424246-164443188	KSR	2i	OK	29.5793	11.3775	-1.37841	12.0436	0	0	yes			Cd200	Cd200	Cd200	chr16:45382134-45409053	KSR	ETP	OK	1.72921	5.05486	1.54756	-5.54196
											A930041C12Rik	0	0	0	0.41648	0	0	0.132253	0	0			Sept1	Sept1	Sept1	chr7:127214441-127218445	KSR	2i	OK	144.366	236.404	0.711521	-10.1368	0	0	yes			Ncbp2	Ncbp2	Ncbp2	chr16:31948545-31958472	KSR	ETP	OK	38.4012	56.7696	0.563966	-5.54181
											AA387883	0	0	0	0	0	0	0	0	0			Serpine2	Serpine2	Serpine2	chr1:79794320-79858665	KSR	2i	OK	30.5358	9.75724	-1.64596	12.5341	0	0	yes			Fhdc1	Fhdc1	Fhdc1	chr3:84442195-84480439	KSR	ETP	OK	0.688532	2.06296	1.58312	-5.51937
											AA388235	0.318252	0.44156	0.270888	0.838448	0.56282	0.564107	0.526727	0.318036	0.510244			Serpinh1	Serpinh1	Serpinh1	chr7:99345374-99353239	KSR	2i	OK	92.9082	31.8768	-1.5433	19.7518	0	0	yes			Gdpd5	Gdpd5	Gdpd5	chr7:99381548-99460984	KSR	ETP	OK	3.91863	7.76909	0.987398	-5.49112
											AA415398	0	0.272521	0.133151	0.183408	0.449382	0.302223	0.436363	0.240856	0.272609			Sfmbt2	Sfmbt2	Sfmbt2	chr2:10370450-10595253	KSR	2i	OK	6.06895	2.42734	-1.32207	8.55255	0	0	yes			Ckb	Ckb	Ckb	chr12:111669354-111672338	KSR	ETP	OK	107.315	152.44	0.506393	-5.48356
											AA465934	35.7829	38.6713	33.7001	35.0971	25.3015	37.7462	30.0933	23.335	25.8015			Sfrp1	Sfrp1	Sfrp1	chr8:23411501-23449632	KSR	2i	OK	14.7422	31.3848	1.09012	-12.1588	0	0	yes			Stard8	Stard8	Stard8	chrX:99042580-99074728	KSR	ETP	OK	3.53267	6.59846	0.90137	-5.48303
											AA467197	0	0.498266	0.626503	0.862588	0.9003	1.10336	1.32771	0.996011	1.23591			Sgk1	Sgk1	Sgk1	chr10:21882183-21999902	KSR	2i	OK	113.164	73.8345	-0.616053	15.762	0	0	yes			Phactr1	Phactr1	Phactr1	chr13:42680622-43138512	KSR	ETP	OK	0.878541	2.445	1.47665	-5.46175
											AA474331	0.759798	0.877527	0.258786	0.739995	1.35269	0.72589	0.433678	0.439231	0.731529			Slc13a5	Slc13a5	Slc13a5	chr11:72241993-72266604	KSR	2i	OK	17.0918	7.61809	-1.16581	9.35227	0	0	yes			Nxt2	Nxt2	Nxt2	chrX:142227936-142239692	KSR	ETP	OK	13.9695	21.2144	0.602762	-5.44341
											AA536875	0	0	0	0	0.037793	0	0.0341848	0	0			Slc29a1	Slc29a1	Slc29a1	chr17:45585199-45599603	KSR	2i	OK	154.704	120.308	-0.362776	11.0603	0	0	yes			Anp32a	Anp32a	Anp32a	chr9:62341342-62378805	KSR	ETP	OK	85.7301	119.755	0.482214	-5.44383
											AA543186	0.00303584	0.1172	0.145885	0.30315	0.0486581	0.290765	0.00469186	0.137665	0.00206352			Slc39a14	Slc39a14	Slc39a14	chr14:70303466-70351424	KSR	2i	OK	18.9702	10.402	-0.866877	10.7984	0	0	yes			Hoxa11	Hoxa11	Hoxa11	chr6:52242105-52249769	KSR	ETP	OK	0.39281	3.45737	3.13777	-5.44072
											AA545190	0	0	0	0	0	0	0	0	0			Slc7a6	Slc7a6	Slc7a6	chr8:106168874-106198704	KSR	2i	OK	21.4348	10.4508	-1.03634	9.87872	0	0	yes			Mir684-1	Mir684-1	Mir684-1	chrX:7753088-7753173	KSR	ETP	OK	162.322	286.92	0.821793	-5.40851
											AA619741	0.04168	0.000256532	0	0	0	0	0	0.0313019	0.000185632			Slc7a7	Slc7a7	Slc7a7	chr14:54360840-54417702	KSR	2i	OK	38.9449	22.9959	-0.76006	8.32745	0	0	yes			Tfrc	Tfrc	Tfrc	chr16:32608895-32632794	KSR	ETP	OK	111.865	150.929	0.432114	-5.39396
											AA792892	0.375566	0.389344	0.56484	0.249249	0.281285	0.285501	2.61812	2.47045	1.56958			Sox7	Sox7	Sox7	chr14:63943705-63950732	KSR	2i	OK	6.6037	0.680437	-3.27874	9.42191	0	0	yes			Hnrnpm	Hnrnpm	Hnrnpm	chr17:33646232-33685458	KSR	ETP	OK	155.457	180.768	0.217626	-5.386
											AA960436	14.4909	13.6687	11.7276	11.4542	10.3127	11.1892	13.4317	14.0387	12.4187			Sparc	Sparc	Sparc	chr11:55394500-55420080	KSR	2i	OK	307.568	127.276	-1.27294	19.5901	0	0	yes			Bhmt	Bhmt	Bhmt	chr13:93616890-93637758	KSR	ETP	OK	1.87621	5.55664	1.56639	-5.38283
											AA986860	0.257948	0.241297	0.122069	3.26716	2.85265	3.02791	1.12707	1.47551	1.54478			Spry2	Spry2	Spry2	chr14:105891946-105896819	KSR	2i	OK	80.5919	46.6238	-0.78957	9.77337	0	0	yes			Phf6	Phf6	Phf6	chrX:52912265-52956943	KSR	ETP	OK	11.0695	17.0079	0.61961	-5.34004
											AA987161	3.82846	4.51372	4.12524	4.77974	4.39543	4.32217	4.66301	3.96109	4.03094			Spry4	Spry4	Spry4	chr18:38586264-38601268	KSR	2i	OK	23.627	10.8998	-1.11613	11.6949	0	0	yes			Foxf2	Foxf2	Foxf2	chr13:31625815-31631406	KSR	ETP	OK	0.761493	3.68844	2.27611	-5.33885
											AB099516	8.77459e-08	4.21642e-08	0	0	3.96442e-07	2.91352e-09	0	0	9.1849e-08			Srgn	Srgn	Srgn	chr10:62494427-62507755	KSR	2i	OK	53.6452	4.30796	-3.63837	14.176	0	0	yes			Grb10	Grb10	Grb10	chr11:11930498-12037420	KSR	ETP	OK	32.2144	39.0604	0.278003	-5.32757
											AB124611	0	0	0	0	0	0	0	0	0			Stard8	Stard8	Stard8	chrX:99042580-99074728	KSR	2i	OK	3.49489	0.499926	-2.80546	8.36831	0	0	yes			Glipr2	Glipr2	Glipr2	chr4:43957701-43979118	KSR	ETP	OK	51.4513	73.4272	0.513107	-5.30013
											AF067061	10.8334	9.721	7.59907	0.836463	0.976427	1.29642	23.0648	25.3038	23.9749			Stmn2	Stmn2	Stmn2	chr3:8509526-8561604	KSR	2i	OK	117.179	187.955	0.68167	-9.8988	0	0	yes			Mras	Mras	Mras	chr9:99385419-99436712	KSR	ETP	OK	17.754	26.2415	0.563702	-5.29508
											AF067063	1.87683	0.974009	1.27528	0.128348	0.2715	0.212438	4.40294	4.62025	4.13516			Stra8	Stra8	Stra8	chr6:34920959-34939342	KSR	2i	OK	92.5986	28.0719	-1.72186	17.543	0	0	yes			Ccrn4l	Ccrn4l	Ccrn4l	chr3:51224446-51251654	KSR	ETP	OK	62.5701	86.623	0.469276	-5.29439
											AF251705	0	0	0	0	0	0	0	0	0.00192162			Sycp1	Sycp1	Sycp1	chr3:102818498-102936100	KSR	2i	OK	17.4239	3.79919	-2.1973	14.3384	0	0	yes			Myo7a	Myo7a	Myo7a	chr7:98051053-98119493	KSR	ETP	OK	2.7026	4.54177	0.748905	-5.28187
											AF357355	0	0	0	0	0	0	0	0	0			Taf7l	Taf7l	Taf7l	chrX:134460115-134476490	KSR	2i	OK	36.6198	10.8498	-1.75495	13.8762	0	0	yes			Zc3h12a	Zc3h12a	Zc3h12a	chr4:125118413-125127881	KSR	ETP	OK	8.49813	14.7953	0.799927	-5.27839
											AF357359	0	0	0	0	0	0	0	0	0			Tagln	Tagln	Tagln	chr9:45863690-45936058	KSR	2i	OK	17.6041	1.10054	-3.99963	10.4681	0	0	yes			Tfec	Tfec	Tfec	chr6:16833380-16898441	KSR	ETP	OK	1.15113	4.59693	1.99762	-5.26473
											AF357425	0	0	0	0	0	0	0	0	0			Tcstv3	Tcstv3	Tcstv3	chr13:120316861-120318261	KSR	2i	OK	31.3928	11.2826	-1.47633	8.33304	0	0	yes			Pdlim4	Pdlim4	Pdlim4	chr11:54054927-54069017	KSR	ETP	OK	5.11789	12.5986	1.29964	-5.25226
											AF357426	0	1.08419	0	0	0	0	0	0	0			Tdh	Tdh	Tdh	chr14:63492346-63509092	KSR	2i	OK	167.069	354.811	1.08661	-16.6573	0	0	yes			Hnrnph2	Hnrnph2	Hnrnph2	chrX:134601285-134607054	KSR	ETP	OK	40.1906	57.3096	0.511919	-5.24836
											AF366264	0.141943	0.106904	0.0285001	0.269244	0.230899	0.143037	0	0.0708963	0.192482			Tex19.1	Tex19.1	Tex19.1	chr11:121146142-121148313	KSR	2i	OK	106.192	51.7094	-1.03818	13.0132	0	0	yes			Chordc1	Chordc1	Chordc1	chr9:18292266-18314000	KSR	ETP	OK	42.6939	61.1225	0.517674	-5.23465
											AF529169	0	0.0205052	0.0473586	0.370169	0.239131	0.274506	0.0467756	0.0651993	0.0950792			Tfcp2l1	Tfcp2l1	Tfcp2l1	chr1:118627944-118685168	KSR	2i	OK	38.3251	68.5776	0.839449	-12.9751	0	0	yes			1700034H14Rik	1700034H14Rik	1700034H14Rik	chr18:84935024-84981392	KSR	ETP	OK	13.8915	24.8161	0.837075	-5.2055
											AI115009	0	0	0	0.0771418	0.0558152	0	0	0	0			Tfpi	Tfpi	Tfpi	chr2:84432859-84476775	KSR	2i	OK	46.7025	19.7197	-1.24386	11.3943	0	0	yes			Slc25a36	Slc25a36	Slc25a36	chr9:97077010-97111041	KSR	ETP	OK	36.6773	51.7195	0.495823	-5.15768
											AI118078	0.278281	0.161288	0.500297	0.822189	0.798031	0.878597	0.801808	1.01653	1.02969			Tpm1	Tpm1	Tpm1	chr9:67022592-67049213	KSR	2i	OK	72.5606	32.2915	-1.16803	14.6072	0	0	yes			Tns3	Tns3	Tns3	chr11:8431651-8664535	KSR	ETP	OK	31.1666	42.384	0.443517	-5.14087
											AI182371	0.0536965	0.412657	0.340749	0.0718253	0.307178	0.33007	0.210257	0.176796	0.212009			Trp53inp1	Trp53inp1	Trp53inp1	chr4:11156440-11174377	KSR	2i	OK	43.4259	34.5324	-0.330605	8.78405	0	0	yes			Dusp4	Dusp4	Dusp4	chr8:34807609-34819894	KSR	ETP	OK	7.83615	13.9805	0.835196	-5.13576
											AI197445	0.0465474	0	0	0.0566292	0.0193009	0	0.0184463	0.052585	0.0408502			Trpm1	Trpm1	Trpm1	chr7:64153834-64269759	KSR	2i	OK	1.48427	10.9936	2.88883	-11.608	0	0	yes			Ceacam1	Ceacam1	Ceacam1	chr7:25379526-25566417	KSR	ETP	OK	4.31801	7.71906	0.838059	-5.13062
											AI314180	6.29539	7.1046	5.98575	10.2736	10.0237	10.5767	8.08236	8.27234	8.31711			Tuba3b	Tuba3b	Tuba3b	chr6:145615962-145621477	KSR	2i	OK	57.8273	25.6999	-1.16999	11.3188	0	0	yes			Ubash3b	Ubash3b	Ubash3b	chr9:41013640-41157494	KSR	ETP	OK	3.24924	6.51653	1.004	-5.12794
											AI314831	0.0716909	0	0.0284363	0.0408918	0.0574841	0.129871	0.110766	0.0508069	0.116287			Tubb2b	Tubb2b	Tubb2b	chr13:34127007-34130354	KSR	2i	OK	143.816	218.645	0.604365	-9.0259	0	0	yes			Abcd1	Abcd1	Abcd1	chrX:73716596-73738287	KSR	ETP	OK	3.04722	6.14707	1.01241	-5.11533
											AI314976	40.9308	40.191	40.3986	42.7781	36.0037	39.5249	34.6616	34.992	36.9661			Txnip	Txnip	Txnip	chr3:96555767-96566801	KSR	2i	OK	81.053	62.7647	-0.368913	8.47591	0	0	yes			Gabarapl2	Gabarapl2	Gabarapl2	chr8:111940702-111952915	KSR	ETP	OK	407.273	541.571	0.411153	-5.11562
											AI316807	4.00092	3.25481	4.43798	3.94569	2.69479	3.72719	3.21057	3.89579	3.89447			Uhrf1	Uhrf1	Uhrf1	chr17:56303336-56323486	KSR	2i	OK	137.659	204.67	0.572204	-36.9677	0	0	yes			Sox17	Sox17	Sox17	chr1:4490927-4496413	KSR	ETP	OK	3.25072	6.75706	1.05564	-5.11094
											AI317395	0.128583	0.0611989	0.136335	0.388717	0.174308	0.099115	0.0674702	0.345053	0.155549			Utf1	Utf1	Utf1	chr7:139943855-139945112	KSR	2i	OK	237.994	146.504	-0.699985	9.48706	0	0	yes			Angel2	Angel2	Angel2	chr1:190925107-190946491	KSR	ETP	OK	18.1892	24.4854	0.428835	-5.11077
											AI413582	7.43871	6.70657	4.89336	7.84345	6.34763	4.44569	8.1345	6.90723	5.1104			Vegfa	Vegfa	Vegfa	chr17:46016992-46032377	KSR	2i	OK	21.1413	11.3025	-0.903418	9.03155	0	0	yes			Gls	Gls	Gls	chr1:52163449-52233232	KSR	ETP	OK	15.3491	21.8841	0.511732	-5.10977
											AI414108	3.42141	2.89539	3.29251	2.09407	2.23069	2.83129	1.80755	2.83751	2.57792			Zscan4a	Zscan4a	Zscan4a	chr7:10794240-10799065	KSR	2i	OK	37.9426	16.3816	-1.21175	11.6062	0	0	yes			Zfp532	Zfp532	Zfp532	chr18:65580229-65689436	KSR	ETP	OK	16.2162	23.2813	0.521737	-5.10544
											AI427809	0.386487	0.350532	0.396325	0.760371	0.36144	0.929476	0.494211	0.608921	0.452878			Zscan4b	Zscan4b	Zscan4b	chr7:10900739-10905050	KSR	2i	OK	35.3579	15.728	-1.16869	9.96893	0	0	yes			Fabp3	Fabp3	Fabp3	chr4:130308777-130315463	KSR	ETP	OK	191.145	266.03	0.47692	-5.08256
											AI428936	4.80724	4.28686	4.04582	1.00136	1.95774	1.73949	4.53771	4.9444	4.21165			Zscan4c	Zscan4c	Zscan4c	chr7:11005744-11010547	KSR	2i	OK	52.9122	22.8772	-1.20969	13.0059	0	0	yes			Tnfsf12	Tnfsf12	Tnfsf12	chr11:69682576-69696098	KSR	ETP	OK	4.14342	10.5234	1.3447	-5.07198
											AI429214	0.195619	0.258411	0.399985	0.653079	0.399775	0.445197	0.395659	0.335053	0.409403			Zscan4d	Zscan4d	Zscan4d	chr7:11161642-11166148	KSR	2i	OK	42.5208	18.108	-1.23154	11.7246	0	0	yes			Ruvbl1	Ruvbl1	Ruvbl1	chr6:88465422-88497566	KSR	ETP	OK	91.0516	125.375	0.461495	-5.06891
											AI450353	1.11669	1.07889	1.1341	1.49039	0.802349	1.32018	1.23465	1.57504	1.41272			Zscan4e	Zscan4e	Zscan4e	chr7:11306377-11310682	KSR	2i	OK	37.2049	16.7109	-1.15471	10.0422	0	0	yes			Bag5	Bag5	Bag5	chr12:111709489-111713256	KSR	ETP	OK	11.9692	19.8265	0.72811	-5.06522
											AI462493	20.4535	21.0079	19.1395	23.3409	23.789	21.897	24.9423	25.0529	24.5963			Zscan4f	Zscan4f	Zscan4f	chr7:11397914-11402318	KSR	2i	OK	62.5598	26.5523	-1.2364	13.0285	0	0	yes			6430527G18Rik	6430527G18Rik	6430527G18Rik	chr12:86880702-86884814	KSR	ETP	OK	40.6215	56.2126	0.468651	-5.0601
											AI463170	0	0	0	0	0	0	0	0.173081	0			Abcb1b	Abcb1b	Abcb1b	chr5:8798146-8866314	KSR	2i	OK	15.178	8.02645	-0.919152	8.25289	2.22045e-16	1.31336e-14	yes			Fjx1	Fjx1	Fjx1	chr2:102449365-102451792	KSR	ETP	OK	4.00513	8.46721	1.08004	-5.03416
											AI464131	6.20734	7.94066	7.89643	4.04008	4.44873	4.88732	4.53322	4.89619	4.66778			D17Ertd648e	D17Ertd648e	D17Ertd648e	chr17:10840383-12063360	KSR	2i	OK	42.7867	13.1901	-1.69771	8.25335	2.22045e-16	1.31336e-14	yes			Stra6	Stra6	Stra6	chr9:58129087-58153997	KSR	ETP	OK	5.61228	9.77866	0.801051	-4.9958
											AI467606	8.53471	8.36298	8.9752	6.75976	6.19012	6.55359	6.2655	6.57392	7.42616			Gm14511	Gm14511	Gm14511	chrX:8975711-8976559	KSR	2i	OK	36.4958	13.8345	-1.39946	8.2034	2.22045e-16	1.31336e-14	yes			Satb1	Satb1	Satb1	chr17:51736186-51833290	KSR	ETP	OK	3.28724	5.26176	0.678667	-4.98249
											AI480653	10.0022	9.64177	9.46978	9.45316	10.3608	9.99241	9.35281	8.36279	8.8557			Gm4262	Gm4262	Gm4262	chr16:11008897-11015184	KSR	2i	OK	9.90293	2.32516	-2.09053	8.18484	2.22045e-16	1.31336e-14	yes			Lrrc34	Lrrc34	Lrrc34	chr3:30624266-30672431	KSR	ETP	OK	16.7272	26.6071	0.669617	-4.94916
											AI504432	0.0519086	0.0286402	0.0593418	0.137779	0.107403	0.101056	0.103051	0.068739	0.048476			Lphn2	Lphn2	Lphn2	chr3:148815585-148954635	KSR	2i	OK	4.3347	1.37943	-1.65186	8.26758	2.22045e-16	1.31336e-14	yes			Elovl4	Elovl4	Elovl4	chr9:83778691-83806305	KSR	ETP	OK	4.87461	8.79147	0.850818	-4.94429
											AI506816	1.43638	2.03083	1.54432	3.10156	1.52941	2.20358	1.35198	1.26018	1.71474			Mreg	Mreg	Mreg	chr1:72159232-72212307	KSR	2i	OK	118.514	79.3514	-0.578726	8.24574	2.22045e-16	1.31336e-14	yes			Zfp281	Zfp281	Zfp281	chr1:136624900-136630391	KSR	ETP	OK	24.2766	29.8168	0.296556	-4.9227
											AI507597	2.45135	2.12541	1.59845	1.65218	2.75246	0.821256	1.66605	2.34068	2.23415			Ptpn14	Ptpn14	Ptpn14	chr1:189728267-189876693	KSR	2i	OK	4.92614	2.42312	-1.02359	8.23615	2.22045e-16	1.31336e-14	yes			Tlr2	Tlr2	Tlr2	chr3:83836271-83841608	KSR	ETP	OK	6.98606	12.0483	0.78628	-4.91132
											AI593442	0	0.0149089	0.016015	0.12285	0.0836855	0.0431935	0.0156654	0	0.0686935			Rtel1	Rtel1	Rtel1	chr2:181319723-181356616	KSR	2i	OK	20.1108	28.8079	0.518493	-8.28455	2.22045e-16	1.31336e-14	yes			3110003A17Rik	3110003A17Rik	3110003A17Rik	chr10:18011259-18023252	KSR	ETP	OK	32.1418	52.2341	0.700543	-4.86108
											AI597468	7.46151	8.42611	8.03936	9.17269	8.18369	9.39261	7.60008	8.06238	7.0485			Sfn	Sfn	Sfn	chr4:133600555-133602168	KSR	2i	OK	20.4019	7.94561	-1.36047	8.17777	2.22045e-16	1.31336e-14	yes			Fam134b	Fam134b	Fam134b	chr15:25843263-25973687	KSR	ETP	OK	8.09621	13.4926	0.736848	-4.85375
											AI597479	8.72416	9.20843	8.7967	11.7653	11.9389	10.9056	8.7919	9.83546	8.94983			Uhrf2	Uhrf2	Uhrf2	chr19:30030512-30093724	KSR	2i	OK	24.2355	13.7424	-0.818492	8.24779	2.22045e-16	1.31336e-14	yes			Tfdp2	Tfdp2	Tfdp2	chr9:96196274-96323646	KSR	ETP	OK	9.55198	12.0419	0.334194	-4.84994
											AI606473	0	0	0	0.18609	0.128747	0.149638	0.122489	0.0785394	0			Usp17l5	Usp17l5	Usp17l5	chr7:103416695-103419174	KSR	2i	OK	11.6756	2.91152	-2.00366	8.28097	2.22045e-16	1.31336e-14	yes			Fam176a	Fam176a	Fam176a	chr6:82041627-82093099	KSR	ETP	OK	4.6355	9.68394	1.06287	-4.84826
											AI607873	0	0	0	0	0	0	0	0	0			Alpl	Alpl	Alpl	chr4:137741731-137796377	KSR	2i	OK	57.3344	88.1226	0.620111	-8.14087	4.44089e-16	2.53875e-14	yes			Tcf4	Tcf4	Tcf4	chr18:69344491-69687967	KSR	ETP	OK	7.04155	9.84201	0.48306	-4.84146
											AI646023	0.0847249	0.0969479	0.129145	0.28857	0.455262	0.691769	0.230772	0.405435	0.139642			Erf	Erf	Erf	chr7:25242559-25250758	KSR	2i	OK	77.718	52.0038	-0.579631	8.11325	4.44089e-16	2.53875e-14	yes			Tmem151b	Tmem151b	Tmem151b	chr17:45523433-45549677	KSR	ETP	OK	1.52549	3.26361	1.0972	-4.82943
											AI646519	0	0	0	0	0	0	0.139866	0	0			Fam122b	Fam122b	Fam122b	chrX:53243414-53269805	KSR	2i	OK	17.9674	10.7207	-0.744979	8.12426	4.44089e-16	2.53875e-14	yes			Ythdf3	Ythdf3	Ythdf3	chr3:16183182-16217037	KSR	ETP	OK	21.5584	26.1074	0.27621	-4.80997
											AI661453	1.18116	1.20142	1.15164	0.626363	0.548701	0.500604	1.25225	1.11018	1.23772			Fgfr2	Fgfr2	Fgfr2	chr7:130162450-130266808	KSR	2i	OK	3.34747	0.282308	-3.56773	8.1468	4.44089e-16	2.53875e-14	yes			Plekha8	Plekha8	Plekha8	chr6:54595110-54645822	KSR	ETP	OK	10.7755	13.6645	0.342669	-4.80845
											AI662270	7.22237	7.85499	7.48036	4.98953	3.59342	4.41562	7.2489	8.0691	8.94406			Gm10664	Gm10664	Gm10664	chr8:65028416-65037336	KSR	2i	OK	17.0414	38.6635	1.18193	-8.10139	4.44089e-16	2.53875e-14	yes			Elovl6	Elovl6	Elovl6	chr3:129532385-129638493	KSR	ETP	OK	42.9476	56.972	0.407676	-4.80768
											AI747448	0.0320957	0.0680745	0.0757406	0.0380399	0.0611425	0	0.0309279	0.0253081	0.00507349			Manba	Manba	Manba	chr3:135485610-135571403	KSR	2i	OK	35.2235	54.2015	0.621795	-8.10083	4.44089e-16	2.53875e-14	yes			Trps1	Trps1	Trps1	chr15:50654758-50890041	KSR	ETP	OK	2.66455	4.26004	0.676975	-4.79778
											AI836003	0.111164	0	0.180274	0.131162	0.0922751	0.314147	0.129083	0.363677	0.366708			Stmn1	Stmn1	Stmn1	chr4:134468319-134473843	KSR	2i	OK	229.173	336.693	0.554995	-8.14055	4.44089e-16	2.53875e-14	yes			Slc7a2	Slc7a2	Slc7a2	chr8:40862366-40922070	KSR	ETP	OK	1.04712	2.11239	1.01245	-4.79432
											AI837181	15.6646	12.4159	14.5841	13.7306	14.1691	12.3423	16.3189	17.5571	16.2504			Foxq1	Foxq1	Foxq1	chr13:31558169-31560974	KSR	2i	OK	6.15163	0.526958	-3.54521	8.07249	6.66134e-16	3.77202e-14	yes			Ppid	Ppid	Ppid	chr3:79591388-79603650	KSR	ETP	OK	107.307	143.957	0.423897	-4.79342
											AI846148	12.8748	11.919	14.0441	14.1763	15.4591	16.4438	19.2437	16.7665	15.8923			Tspan9	Tspan9	Tspan9	chr6:127961399-128143578	KSR	2i	OK	13.328	6.68312	-0.995866	8.06316	6.66134e-16	3.77202e-14	yes			Polr2d	Polr2d	Polr2d	chr18:31789158-31796701	KSR	ETP	OK	74.8631	101.102	0.433491	-4.74985
											AI847159	0.114868	0.076237	0	0	0.0941401	0	0	0	0			Btg2	Btg2	Btg2	chr1:134074864-134079155	KSR	2i	OK	23.561	13.0154	-0.856176	8.0562	8.88178e-16	4.98214e-14	yes			Arntl	Arntl	Arntl	chr7:113207464-113314126	KSR	ETP	OK	11.6025	16.7867	0.532879	-4.73613
											AI848100	6.81592	7.94713	6.88362	9.97755	10.1259	10.5412	9.43921	9.21491	9.36117			Itga6	Itga6	Itga6	chr2:71787082-71856758	KSR	2i	OK	51.5359	33.8786	-0.605202	8.04211	8.88178e-16	4.98214e-14	yes			Atp13a3	Atp13a3	Atp13a3	chr16:30312423-31275697	KSR	ETP	OK	37.7424	43.7299	0.212435	-4.73238
											AI848285	5.84967	6.17095	5.47842	4.05394	6.00293	4.80252	4.89368	4.68088	2.37431			Dub3	Dub3	Dub3	chr7:104768048-104777470	KSR	2i	OK	15.3024	5.85618	-1.38573	8.01525	1.11022e-15	6.14118e-14	yes			Foxd3	Foxd3	Foxd3	chr4:99656298-99658671	KSR	ETP	OK	15.0404	23.8801	0.666964	-4.72518
											AI854517	0.75064	0.860615	0.647406	0.586479	0.612261	0.61003	0.629381	0.680446	0.817716			Lefty2	Lefty2	Lefty2	chr1:180893118-180899102	KSR	2i	OK	16.384	29.758	0.86099	-8.00836	1.11022e-15	6.14118e-14	yes			Gm9781	Gm9781	Gm9781	chr2:122028582-122118386	KSR	ETP	OK	6.0691	15.8117	1.38144	-4.72286
											AI854703	0.278378	0.25055	0.284788	0.683939	0.79565	0.375875	0.27827	0.322834	0.471606			Scd1	Scd1	Scd1	chr19:44394449-44407709	KSR	2i	OK	11.5049	19.4972	0.761022	-8.01063	1.11022e-15	6.14118e-14	yes			Itga9	Itga9	Itga9	chr9:118606708-118901003	KSR	ETP	OK	4.09916	6.46456	0.657224	-4.71706
											AI987944	2.46827	2.93646	3.0648	2.96733	3.01852	2.90289	2.83595	1.99831	2.23621			Cstb	Cstb	Cstb	chr10:78425669-78427622	KSR	2i	OK	98.6159	165.323	0.745395	-7.98678	1.33227e-15	7.3018e-14	yes			Arid5b	Arid5b	Arid5b	chr10:68095592-68278726	KSR	ETP	OK	19.4549	27.2257	0.484833	-4.71386
											AK010878	13.4961	11.6256	13.1495	15.5086	14.8047	16.8182	12.1942	10.1285	9.17581			Klf5	Klf5	Klf5	chr14:99298690-99313409	KSR	2i	OK	139.726	92.3032	-0.598145	7.98803	1.33227e-15	7.3018e-14	yes			Spen	Spen	Spen	chr4:141444672-141538597	KSR	ETP	OK	6.70766	9.51371	0.504199	-4.71215
											AK129341	0.944641	1.28537	1.32906	1.44864	1.49259	1.52997	1.99369	2.37508	1.63716			Fabp5	Fabp5	Fabp5	chr3:10012605-10016610	KSR	2i	OK	36.3159	15.4197	-1.23583	7.96232	1.77636e-15	9.69128e-14	yes			Atp5j	Atp5j	Atp5j	chr16:84827870-84863778	KSR	ETP	OK	202.036	271.864	0.428267	-4.71115
											AU015228	0.127097	0.224302	0.293314	0.133583	0.123563	0.130006	1.7138	1.38313	1.5447			Slc25a36	Slc25a36	Slc25a36	chr9:97077010-97111041	KSR	2i	OK	36.2	55.918	0.62732	-7.92022	2.44249e-15	1.32649e-13	yes			Itgb7	Itgb7	Itgb7	chr15:102215994-102231935	KSR	ETP	OK	7.98398	13.2879	0.734929	-4.70006
											AU015836	0.283222	0.516983	0.443603	1.96234	1.50822	1.53746	2.90405	3.52291	4.45028			Gm10696	Gm10696	Gm10696	chr3:94174411-94178193	KSR	2i	OK	6.42493	1.04566	-2.61926	7.90973	2.66454e-15	1.44054e-13	yes			Slc44a3	Slc44a3	Slc44a3	chr3:121459527-121532344	KSR	ETP	OK	1.26975	3.57857	1.49484	-4.69703
											AU016765	0	0	0	0	0	0	0	0	0			Rbm3	Rbm3	Rbm3	chrX:8138974-8147963	KSR	2i	OK	255.034	322.962	0.340674	-7.88275	3.10862e-15	1.67306e-13	yes			Dcp2	Dcp2	Dcp2	chr18:44380499-44424969	KSR	ETP	OK	18.9629	25.3967	0.421463	-4.67915
											AU018091	61.2363	63.8751	65.7837	51.9445	55.2467	58.8812	51.9157	49.3761	53.4585			Fam198b	Fam198b	Fam198b	chr3:79885929-79946278	KSR	2i	OK	4.51639	1.78574	-1.33865	7.86405	3.77476e-15	2.02246e-13	yes			Nrg2	Nrg2	Nrg2	chr18:36017657-36197160	KSR	ETP	OK	2.39766	5.50734	1.19973	-4.67795
											AU018829	0	0	0	0	0	0	0	0	0			Sod2	Sod2	Sod2	chr17:13007838-13018119	KSR	2i	OK	34.9763	52.9146	0.597287	-7.85331	3.9968e-15	2.13187e-13	yes			Pigl	Pigl	Pigl	chr11:62458459-62513900	KSR	ETP	OK	18.0626	28.1681	0.641058	-4.66765
											AU018829	0	0	0	0	0	0	0	0	0			Dysf	Dysf	Dysf	chr6:84008589-84211042	KSR	2i	OK	2.60155	0.566202	-2.19998	7.84513	4.21885e-15	2.23039e-13	yes			Cyp2s1	Cyp2s1	Cyp2s1	chr7:25802475-25816530	KSR	ETP	OK	5.66186	10.0807	0.832244	-4.65842
											AU018829	0	0	0	0	0	0	0	0	0			Qsox1	Qsox1	Qsox1	chr1:155778154-155812899	KSR	2i	OK	9.88991	3.63971	-1.44213	7.85024	4.21885e-15	2.23039e-13	yes			Psme4	Psme4	Psme4	chr11:30771774-30880361	KSR	ETP	OK	47.8179	62.5936	0.388463	-4.65746
											AU018829	0	0	0	0	0	0	0	0	0			E130012A19Rik	E130012A19Rik	E130012A19Rik	chr11:97627386-97629716	KSR	2i	OK	166.54	114.897	-0.535534	7.83567	4.66294e-15	2.45431e-13	yes			Lpcat1	Lpcat1	Lpcat1	chr13:73467382-73514538	KSR	ETP	OK	19.304	30.0416	0.638064	-4.6468
											AU018829	0	0	0	0	0	0	0	0	0			Cyr61	Cyr61	Cyr61	chr3:145646970-145649985	KSR	2i	OK	13.6869	4.95328	-1.46634	7.83213	4.88498e-15	2.5599e-13	yes			Tob1	Tob1	Tob1	chr11:94211453-94215492	KSR	ETP	OK	19.2413	28.4858	0.566036	-4.62761
											AU019823	11.683	12.7658	11.9361	16.5576	16.943	15.2746	13.9713	12.3359	12.973			Ccnd2	Ccnd2	Ccnd2	chr6:127125708-127212419	KSR	2i	OK	2.64473	0.476914	-2.47132	7.82059	5.32907e-15	2.78043e-13	yes			Id3	Id3	Id3	chr4:136143821-136145392	KSR	ETP	OK	25.7205	41.8311	0.701657	-4.62485
											AU019990	0.049873	0.147763	0.0815458	0	0.0402016	0	0.418795	0.263307	0.59872			Anxa3	Anxa3	Anxa3	chr5:96793384-96845968	KSR	2i	OK	11.8681	3.263	-1.86282	7.78912	6.66134e-15	3.46042e-13	yes			Pmepa1	Pmepa1	Pmepa1	chr2:173224464-173276533	KSR	ETP	OK	10.9104	16.0033	0.552668	-4.61075
											AU021034	0	0	0	0	0	0.0449064	0	0	0			Hexb	Hexb	Hexb	chr13:97137936-97198357	KSR	2i	OK	40.8645	65.3793	0.677984	-7.78753	6.88338e-15	3.56029e-13	yes			H2-Ab1	H2-Ab1	H2-Ab1	chr17:34263226-34269418	KSR	ETP	OK	1.49282	5.74377	1.94396	-4.60004
											AU021063	1.08048	0.241844	0.445898	1.4637	1.53576	2.0538	0.875743	0.689917	1.12316			Aplp2	Aplp2	Aplp2	chr9:31149556-31211815	KSR	2i	OK	86.4723	101.947	0.237504	-7.72569	1.11022e-14	5.71765e-13	yes			Itch	Itch	Itch	chr2:155133480-155226855	KSR	ETP	OK	20.7067	24.9695	0.27007	-4.59695
											AU021092	0.171328	0.115562	0.359926	0.480223	0.277264	0.317119	0.519544	0.831975	0.493033			Actn4	Actn4	Actn4	chr7:28881655-28962280	KSR	2i	OK	201.654	143.965	-0.486166	7.71174	1.24345e-14	6.37628e-13	yes			Rrp1b	Rrp1b	Rrp1b	chr17:32036161-32062862	KSR	ETP	OK	34.3144	39.1796	0.191287	-4.59565
											AU022252	6.39978	6.99095	5.97148	5.84673	6.93118	7.51862	7.75443	8.03821	8.23231			Csda	Csda	Csda	chr6:131364857-131388450	KSR	2i	OK	279.377	247.767	-0.17323	7.70916	1.26565e-14	6.46241e-13	yes			Cotl1	Cotl1	Cotl1	chr8:119809213-119840579	KSR	ETP	OK	38.7461	55.2626	0.512253	-4.58447
											AU022751	8.57016	7.83887	9.66739	10.7394	13.7075	13.1218	15.1411	16.4142	17.6135			Tcstv1	Tcstv1	Tcstv1	chr13:119893387-119894767	KSR	2i	OK	25.1057	8.36042	-1.58637	7.68538	1.53211e-14	7.78963e-13	yes			Tmem181a	Tmem181a	Tmem181a	chr17:6270474-6305783	KSR	ETP	OK	24.4288	35.9287	0.556552	-4.57908
											AU022754	0.0747044	0	0.0355437	0	0	0	0.0606416	0	0.0312985			Atp1a3	Atp1a3	Atp1a3	chr7:24978168-25005895	KSR	2i	OK	14.5056	24.3478	0.747178	-7.67184	1.68754e-14	8.54352e-13	yes			Nfkb1	Nfkb1	Nfkb1	chr3:135584654-135691547	KSR	ETP	OK	14.1287	20.3293	0.52493	-4.5753
											AU022793	0	0	0	0	0	0	0	0	0			Aqp8	Aqp8	Aqp8	chr7:123462293-123468003	KSR	2i	OK	10.0479	1.41467	-2.82836	7.64582	2.08722e-14	1.05224e-12	yes			En2	En2	En2	chr5:28165695-28172166	KSR	ETP	OK	1.9929	4.28673	1.10501	-4.57348
											AU023762	0.123214	0.157443	0.0725861	0.171541	0.126704	0.002551	0.152963	0.235679	0.0733631			Ctsz	Ctsz	Ctsz	chr2:174415803-174438992	KSR	2i	OK	53.0485	30.8189	-0.783495	7.64142	2.15383e-14	1.08126e-12	yes			She	She	She	chr3:89831369-89858846	KSR	ETP	OK	1.54673	2.99475	0.953211	-4.56915
											AU023871	0.057497	0	0.142048	0	0.0447045	0.241666	0.171045	0.249334	0.136936			Perp	Perp	Perp	chr10:18845070-18857072	KSR	2i	OK	17.5439	7.70295	-1.18749	7.63953	2.17604e-14	1.08784e-12	yes			Xbp1	Xbp1	Xbp1	chr11:5520966-5525872	KSR	ETP	OK	57.3591	78.1386	0.446015	-4.55835
											AU040320	2.31651	2.59587	2.25705	2.63661	2.35833	2.72556	2.6668	2.54861	2.57763			Zfp575	Zfp575	Zfp575	chr7:24583837-24608926	KSR	2i	OK	5.65255	1.09185	-2.37213	7.62228	2.4869e-14	1.23806e-12	yes			Rab11fip5	Rab11fip5	Rab11fip5	chr6:85334961-85374634	KSR	ETP	OK	5.19893	7.78486	0.582457	-4.5492
											AU040972	0.236833	1.05837	0.19312	1.06364	0.757114	1.18162	0.996135	0.962437	1.06173			Aqp3	Aqp3	Aqp3	chr4:41092723-41098183	KSR	2i	OK	58.8095	89.8809	0.611967	-7.61385	2.66454e-14	1.32099e-12	yes			Chn2	Chn2	Chn2	chr6:54039931-54430221	KSR	ETP	OK	1.93102	4.20973	1.12437	-4.53304
											AU041133	0.786197	0.825541	1.04289	1.01501	0.871743	0.984806	1.51936	0.875001	1.06278			Slc26a2	Slc26a2	Slc26a2	chr18:61196853-61211596	KSR	2i	OK	10.087	4.72941	-1.09276	7.60746	2.79776e-14	1.38131e-12	yes			Cobl	Cobl	Cobl	chr11:12236675-12464960	KSR	ETP	OK	34.4588	45.5052	0.40116	-4.51744
											AV039307	0	0	0	0	0.112841	0	0.140533	0.100467	0.242848			Nostrin	Nostrin	Nostrin	chr2:69135799-69189329	KSR	2i	OK	8.57845	0.614556	-3.8031	7.57458	3.59712e-14	1.76866e-12	yes			Hoxa11as	Hoxa11as	Hoxa11as	chr6:52242105-52249769	KSR	ETP	OK	0.39479	2.94177	2.89753	-4.50968
											AV051173	0.436949	0.140067	0.343382	0.242854	0	0.576347	0.33116	0.473954	0			Stk38	Stk38	Stk38	chr17:28970884-29007937	KSR	2i	OK	28.1411	43.6713	0.634007	-7.56805	3.79696e-14	1.85927e-12	yes			Lypla1	Lypla1	Lypla1	chr1:4807892-4846735	KSR	ETP	OK	44.1236	59.788	0.438306	-4.5051
											AV320801	5.41068	5.72472	5.29013	7.89841	8.57496	8.6406	8.37316	8.23585	8.26463			Slc2a1	Slc2a1	Slc2a1	chr4:119108744-119137329	KSR	2i	OK	107.811	74.0988	-0.540978	7.56572	3.86358e-14	1.88416e-12	yes			Mrpl42	Mrpl42	Mrpl42	chr10:95480805-95501927	KSR	ETP	OK	145.725	198.448	0.445508	-4.50186
											AW011738	0	0	0.0923116	0.048561	0.0319795	0	0.0317186	0.058696	0.094633			H2afz	H2afz	H2afz	chr3:137864598-137866922	KSR	2i	OK	1053.09	1453.62	0.465025	-7.54717	4.44089e-14	2.1569e-12	yes			Ndufs1	Ndufs1	Ndufs1	chr1:63114470-63176822	KSR	ETP	OK	93.5831	104.197	0.154989	-4.49353
											AW046200	0	0	0	0	0	0.0760589	0	0	0			Cyp2b23	Cyp2b23	Cyp2b23	chr7:26665226-26686430	KSR	2i	OK	6.9377	15.3644	1.14706	-7.54322	4.57412e-14	2.21261e-12	yes			Col11a1	Col11a1	Col11a1	chr3:114030539-114220326	KSR	ETP	OK	0.579876	1.40314	1.27484	-4.45897
											AW112010	0	0	0	0	0	0	0	0	0			Jam3	Jam3	Jam3	chr9:27097383-27155421	KSR	2i	OK	14.99	6.21449	-1.27029	7.53035	5.06262e-14	2.43904e-12	yes			Tlx2	Tlx2	Tlx2	chr6:83068324-83070225	KSR	ETP	OK	0.701957	4.16982	2.57053	-4.44981
											AW146020	3.28115	3.3291	4.01071	4.0175	3.33545	3.44285	3.3147	4.05761	3.66961			Vat1	Vat1	Vat1	chr11:101458747-101466199	KSR	2i	OK	64.6949	94.6436	0.548853	-7.51965	5.4845e-14	2.63168e-12	yes			Sumo1	Sumo1	Sumo1	chr1:59639433-59670834	KSR	ETP	OK	194.467	252.288	0.375541	-4.44295
											AW146154	3.15224	3.2038	3.11048	4.08613	3.31463	3.1496	3.20622	2.98721	2.2956			Lsr	Lsr	Lsr	chr7:30957769-30973469	KSR	2i	OK	21.5077	11.4023	-0.915534	7.5061	6.08402e-14	2.90768e-12	yes			Pip4k2a	Pip4k2a	Pip4k2a	chr2:18842255-18998121	KSR	ETP	OK	6.1563	9.93013	0.689749	-4.43707
											AW209491	8.03427	8.42932	8.20281	9.08381	9.22243	9.16058	10.8954	8.31693	8.94053			AU015836	AU015836	AU015836	chrX:93968655-93975470	KSR	2i	OK	4.40306	0.551828	-2.99622	7.50474	6.15064e-14	2.9278e-12	yes			Zbtb6	Zbtb6	Zbtb6	chr2:37425499-37430919	KSR	ETP	OK	4.01815	6.59261	0.714318	-4.43295
											AW495222	0.814946	0.561555	0.596408	0.241689	0.698651	0.811654	0.153519	0.208053	0.0814979			F2r	F2r	F2r	chr13:95601788-95618433	KSR	2i	OK	35.2525	22.302	-0.660549	7.46375	8.41549e-14	3.99001e-12	yes			Idi1	Idi1	Idi1	chr13:8885605-8892396	KSR	ETP	OK	55.6663	73.3212	0.397428	-4.4085
											AW549542	0.467909	0.217152	0.544637	0.669869	0.710693	0.795772	0.846786	0.548799	0.735884			Anapc5	Anapc5	Anapc5	chr5:122787460-122821339	KSR	2i	OK	128.765	147.397	0.194964	-7.45605	8.92619e-14	4.21542e-12	yes			Bai1	Bai1	Bai1	chr15:74516195-74589464	KSR	ETP	OK	1.23732	2.55453	1.04583	-4.4067
											AW549877	11.2444	12.2597	11.7216	10.8165	10.3094	10.5219	8.53259	9.03829	9.7761			Tfrc	Tfrc	Tfrc	chr16:32608895-32632794	KSR	2i	OK	110.344	152.418	0.46602	-7.4532	9.10383e-14	4.28238e-12	yes			Enc1	Enc1	Enc1	chr13:97241104-97253040	KSR	ETP	OK	45.5093	59.2687	0.381109	-4.39524
											AW551984	0.41077	0.436747	0.362938	0.377337	0.389401	0.261171	0.246632	0.243449	0.261668			Zfp423	Zfp423	Zfp423	chr8:87661809-87959595	KSR	2i	OK	12.389	6.75385	-0.875282	7.43613	1.03695e-13	4.85861e-12	yes			Pitpnc1	Pitpnc1	Pitpnc1	chr11:107207891-107470720	KSR	ETP	OK	12.1103	16.6913	0.462871	-4.392
											AW554918	1.38412	1.4019	1.24741	0.619986	0.729163	0.888613	0.909361	0.940715	0.990473			Hnrnpm	Hnrnpm	Hnrnpm	chr17:33646232-33685458	KSR	2i	OK	153.009	183.725	0.263936	-7.4356	1.04139e-13	4.86036e-12	yes			Fam105a	Fam105a	Fam105a	chr15:27655070-27681542	KSR	ETP	OK	1.27684	3.14363	1.29986	-4.37989
											AW555464	5.61066	6.44512	6.83724	5.31617	6.50431	5.97362	8.85888	9.83932	9.51637			Stra6	Stra6	Stra6	chr9:58129087-58153997	KSR	2i	OK	5.54576	0.403448	-3.78093	7.42892	1.09468e-13	5.0892e-12	yes			Nkx6-2	Nkx6-2	Nkx6-2	chr7:139389108-139582797	KSR	ETP	OK	5.90546	11.3485	0.942384	-4.37101
											AY074887	0.557313	0.314252	0.470751	0.541021	0.595356	0.552322	0.556766	0.308276	0.239303			Cd209c	Cd209c	Cd209c	chr8:3940221-3946863	KSR	2i	OK	11.1604	2.85418	-1.96725	7.42796	1.10356e-13	5.1106e-12	yes			Oat	Oat	Oat	chr7:132557474-132576398	KSR	ETP	OK	25.8957	36.5678	0.497861	-4.36841
											AY358078	0.371692	0.571565	0.614249	0.570937	0.958485	0.32825	0.73957	0.694224	0.952559			Npc2	Npc2	Npc2	chr12:84754558-84773112	KSR	2i	OK	45.533	66.8112	0.553178	-7.39907	1.37224e-13	6.3303e-12	yes			Snrpg	Snrpg	Snrpg	chr6:86371539-86378902	KSR	ETP	OK	664.984	855.396	0.363274	-4.36551
											AY512915	0	0	0	0.0313706	0.0413516	0	0	0	0			Atp13a3	Atp13a3	Atp13a3	chr16:30312423-31275697	KSR	2i	OK	37.2369	29.6577	-0.328327	7.39745	1.38778e-13	6.37738e-12	yes			Llgl1	Llgl1	Llgl1	chr11:60699689-60727221	KSR	ETP	OK	18.2784	22.5901	0.305553	-4.36579
											AY512931	0.599773	0.553625	0.385525	0.748322	0.709311	0.192171	0.600729	0.885934	1.31851			Pramel6	Pramel6	Pramel6	chr2:87508457-87510865	KSR	2i	OK	16.4463	6.40671	-1.3601	7.3836	1.54099e-13	7.05431e-12	yes			Esam	Esam	Esam	chr9:37528088-37538319	KSR	ETP	OK	4.19877	8.08846	0.945899	-4.36496
											AY761184	0	0.0837641	0	1.12498	0.840464	1.01341	1.17306	1.03573	1.89217			Myo10	Myo10	Myo10	chr15:25622549-25813671	KSR	2i	OK	12.2387	18.7172	0.612908	-7.38291	1.54765e-13	7.05776e-12	yes			Cyp51	Cyp51	Cyp51	chr5:4080673-4104697	KSR	ETP	OK	27.1361	36.1615	0.414243	-4.35991
											AY761185	0	0	0	0	0	0.242393	0	0	0			Tex19.2	Tex19.2	Tex19.2	chr11:121116214-121118677	KSR	2i	OK	9.68355	3.12118	-1.63344	7.36862	1.72307e-13	7.82783e-12	yes			Adam23	Adam23	Adam23	chr1:63445903-63596515	KSR	ETP	OK	21.2959	28.3005	0.410256	-4.35959
											Aaas	53.3576	53.5363	51.051	48.5405	60.7569	55.814	58.4614	56.641	55.9807			Scamp1	Scamp1	Scamp1	chr13:94201432-94285281	KSR	2i	OK	10.4191	5.0587	-1.04239	7.36736	1.74083e-13	7.87857e-12	yes			Nrg1	Nrg1	Nrg1	chr8:31818027-31918203	KSR	ETP	OK	1.57123	4.16798	1.40745	-4.35738
											Aacs	8.15996	7.31154	7.8624	9.82466	12.2292	11.5897	7.82242	7.45402	8.34332			Zfp207	Zfp207	Zfp207	chr11:80383278-80405873	KSR	2i	OK	124.052	142.262	0.197602	-7.3407	2.12497e-13	9.58079e-12	yes			E2f2	E2f2	E2f2	chr4:136172393-136196056	KSR	ETP	OK	8.94945	13.0382	0.542879	-4.34862
											Aadac	0	0	0	0	0	0.0758062	0.117163	0.110947	0.185719			Dclk2	Dclk2	Dclk2	chr3:86786149-86920884	KSR	2i	OK	6.75513	12.4906	0.886789	-7.30903	2.69118e-13	1.20881e-11	yes			Tmem39a	Tmem39a	Tmem39a	chr16:38558697-38592162	KSR	ETP	OK	39.7347	48.0896	0.275327	-4.34705
											Aadacl2	0	0.139723	0	0	0	0	0.0497868	0.138352	0.214719			Tcl1	Tcl1	Tcl1	chr12:105216754-105222737	KSR	2i	OK	45.3158	72.3333	0.674646	-7.26407	3.75699e-13	1.68122e-11	yes			Kbtbd8	Kbtbd8	Kbtbd8	chr6:95117905-95129787	KSR	ETP	OK	10.6788	15.1292	0.502582	-4.34389
											Aadacl3	0	0	0	0	0.024311	0.0303764	0	0.0435931	0			Amn	Amn	Amn	chr12:111271110-111276426	KSR	2i	OK	9.53172	0.694618	-3.77845	7.26343	3.77476e-13	1.68287e-11	yes			Rbm14	Rbm14	Rbm14	chr19:4800924-4811634	KSR	ETP	OK	47.3064	63.1052	0.415724	-4.34083
											Aadat	0.0601248	0	0.0499317	0	0.0491853	0	0	0.0454344	0			Cndp2	Cndp2	Cndp2	chr18:84667468-84685633	KSR	2i	OK	75.5828	50.3876	-0.584989	7.26267	3.79474e-13	1.68549e-11	yes			Galnt2	Galnt2	Galnt2	chr8:124231393-124345723	KSR	ETP	OK	28.6614	38.3527	0.420219	-4.33818
											Aagab	14.0983	15.6466	14.5301	16.5984	16.1386	17.1719	15.6328	15.99	16.5992			Gm8348	Gm8348	Gm8348	chr14:3652029-3673272	KSR	2i	OK	14.7184	6.68314	-1.13902	7.24697	4.26104e-13	1.88559e-11	yes			Btbd11	Btbd11	Btbd11	chr10:85386813-85660292	KSR	ETP	OK	5.06074	7.85806	0.634824	-4.33154
											Aak1	2.00877	2.41628	2.31814	2.7986	3.11424	2.96901	2.40253	2.64744	2.47847			Baz1a	Baz1a	Baz1a	chr12:54892988-54986336	KSR	2i	OK	13.5603	8.26017	-0.715143	7.24608	4.2899e-13	1.89136e-11	yes			Gpr83	Gpr83	Gpr83	chr9:14860253-14869499	KSR	ETP	OK	0.449082	2.25328	2.32698	-4.325
											Aamp	82.8315	81.2137	80.8513	61.5684	71.1418	67.278	78.065	71.8229	75.5097			Tnrc18	Tnrc18	Tnrc18	chr5:142724604-142817387	KSR	2i	OK	5.33518	9.15697	0.779333	-7.2369	4.58966e-13	2.01608e-11	yes			Usmg5	Usmg5	Usmg5	chr19:47067747-47090625	KSR	ETP	OK	376.058	496.421	0.400612	-4.323
											Aanat	0	0	0	0	0	0	0	0	0.0789725			Morc4	Morc4	Morc4	chrX:139821634-139871654	KSR	2i	OK	5.02195	1.79544	-1.48391	7.2364	4.60743e-13	2.01647e-11	yes			Npcd	Npcd	Npcd	chr15:79786350-79834333	KSR	ETP	OK	1.72697	3.96661	1.19966	-4.3224
											Aard	27.8738	34.951	28.2157	52.3515	47.8227	48.7208	29.5432	27.8246	32.3893			Prdx6	Prdx6	Prdx6	chr1:161240111-161251166	KSR	2i	OK	146.657	104.259	-0.492281	7.23105	4.79172e-13	2.08947e-11	yes			Zfp459	Zfp459	Zfp459	chr13:67405712-67421418	KSR	ETP	OK	7.44746	11.542	0.632079	-4.31822
											Aars	97.1263	103.022	100.254	69.0476	76.5375	71.7205	100.561	112.217	104.357			Tex15	Tex15	Tex15	chr8:33570543-33585585	KSR	2i	OK	5.36453	2.8065	-0.934681	7.23059	4.80949e-13	2.08959e-11	yes			Kank4	Kank4	Kank4	chr4:98754891-98817537	KSR	ETP	OK	3.87207	6.30338	0.703021	-4.30062
											Aars2	15.8606	12.2318	13.1538	11.1192	14.6103	12.3007	13.324	13.7089	13.7479			Clgn	Clgn	Clgn	chr8:83389890-83426829	KSR	2i	OK	16.5206	8.16994	-1.01587	7.21793	5.278e-13	2.28484e-11	yes			Frmd4a	Frmd4a	Frmd4a	chr2:4152862-4614043	KSR	ETP	OK	4.07478	6.24428	0.615812	-4.29529
											Aarsd1	39.7267	37.3995	41.7377	31.5951	33.9461	33.9346	36.6632	42.9802	40.6222			Mov10l1	Mov10l1	Mov10l1	chr15:88982993-89055152	KSR	2i	OK	6.21997	2.47811	-1.32767	7.20522	5.79536e-13	2.49975e-11	yes			Fignl1	Fignl1	Fignl1	chr11:11800287-11808962	KSR	ETP	OK	37.2373	44.1291	0.244981	-4.29428
											Aasdh	2.81498	2.85343	3.01672	2.24923	2.44709	2.07426	2.28653	2.28846	2.58814			Dcbld1	Dcbld1	Dcbld1	chr10:52233618-52321377	KSR	2i	OK	28.1443	17.2518	-0.706094	7.17896	7.02327e-13	3.01849e-11	yes			F3	F3	F3	chr3:121723536-121735052	KSR	ETP	OK	9.9481	16.0898	0.693655	-4.28102
											Aasdhppt	18.0648	20.0377	16.6371	21.5131	19.8767	20.6746	20.4937	18.2929	20.2816			Ripk4	Ripk4	Ripk4	chr16:97741941-97763755	KSR	2i	OK	3.90909	0.806938	-2.2763	7.17188	7.39853e-13	3.16837e-11	yes			Cox17	Cox17	Cox17	chr16:38346998-38352763	KSR	ETP	OK	184.438	251.101	0.445135	-4.27647
											Aass	1.78723	1.86564	1.3656	0.257075	0.341428	0.602129	1.53313	1.3021	1.61272			Sp110	Sp110	Sp110	chr1:85576898-85645036	KSR	2i	OK	7.1896	1.45818	-2.30174	7.17125	7.43183e-13	3.17127e-11	yes			Ihh	Ihh	Ihh	chr1:74945317-74951651	KSR	ETP	OK	0.777202	2.72194	1.80828	-4.26898
											Aatf	21.3617	21.3625	19.1676	20.5313	22.2614	21.1056	19.91	19.865	19.4487			Dub2a	Dub2a	Dub2a	chr7:103250085-103252505	KSR	2i	OK	8.85455	2.12543	-2.05866	7.16941	7.53175e-13	3.20247e-11	yes			Gli2	Gli2	Gli2	chr1:118834060-119053619	KSR	ETP	OK	8.29725	11.7325	0.499808	-4.26848
											Aatk	0.101806	0.0808991	0.0210641	0.128	0.0870068	0.0245684	0.020337	0.0984351	0.0927767			Bdh1	Bdh1	Bdh1	chr16:31422296-31458901	KSR	2i	OK	7.57103	14.3728	0.924774	-7.16778	7.62279e-13	3.22968e-11	yes			Zfp423	Zfp423	Zfp423	chr8:87661809-87959595	KSR	ETP	OK	12.5356	17.634	0.492325	-4.25847
											Abat	1.43658	1.1623	1.13105	1.12766	1.42408	1.54099	1.44483	1.57965	1.3062			Psme4	Psme4	Psme4	chr11:30771774-30880361	KSR	2i	OK	47.2494	65.6353	0.474177	-7.1336	9.77884e-13	4.12854e-11	yes			Smpdl3b	Smpdl3b	Smpdl3b	chr4:132732965-132757171	KSR	ETP	OK	4.88	9.03103	0.888008	-4.24376
											Abca1	0.777646	0.941296	0.896765	2.10718	2.06546	2.16368	1.19863	1.51282	1.075			Igfbp3	Igfbp3	Igfbp3	chr11:7206090-7213923	KSR	2i	OK	8.53603	2.9807	-1.51792	7.13273	9.8388e-13	4.13922e-11	yes			Sox2	Sox2	Sox2	chr3:34560380-34677993	KSR	ETP	OK	122.716	157.473	0.359777	-4.2335
											Abca12	0.0796206	0.0193666	0.022126	0.0616028	0.0110584	0.0257844	0.0545048	0.0606144	0.0883737			Ssbp3	Ssbp3	Ssbp3	chr4:106911469-107049694	KSR	2i	OK	29.0372	19.8346	-0.549882	7.12026	1.07714e-12	4.51567e-11	yes			Arhgef25	Arhgef25	Arhgef25	chr10:127182520-127190054	KSR	ETP	OK	14.2618	20.6513	0.534071	-4.2308
											Abca13	0.0856851	0.190727	0.171573	0.351836	0.35466	0.308604	0.433621	0.458046	0.379572			Arhgef10l	Arhgef10l	Arhgef10l	chr4:140514484-140665905	KSR	2i	OK	4.52469	8.95006	0.984079	-7.08261	1.41465e-12	5.90986e-11	yes			Stx3	Stx3	Stx3	chr19:11775117-11819403	KSR	ETP	OK	12.3023	17.3431	0.495437	-4.22762
											Abca14	0.13339	0.118555	0.0810959	0.204434	0.165058	0.118127	0.257823	0.178857	0.282168			Wars	Wars	Wars	chr12:108860029-108894174	KSR	2i	OK	63.5794	47.9259	-0.407755	7.07176	1.52989e-12	6.36902e-11	yes			1810022K09Rik	1810022K09Rik	1810022K09Rik	chr3:14578670-14611256	KSR	ETP	OK	210.869	284.744	0.433319	-4.22386
											Abca15	0	0	0	0	0	0	0	0	0			Gm12794	Gm12794	Gm12794	chr4:101940406-101943183	KSR	2i	OK	12.8255	4.28419	-1.58192	7.07035	1.54543e-12	6.41139e-11	yes			Ier2	Ier2	Ier2	chr8:84661330-84662852	KSR	ETP	OK	84.7014	112.676	0.411725	-4.22367
											Abca16	0.083901	0.0479313	0.087733	0.102459	0.0533011	0.106993	0.0342622	0.0643948	0.125466			Akap12	Akap12	Akap12	chr10:4266328-4359471	KSR	2i	OK	71.6046	97.9333	0.451747	-7.0638	1.62004e-12	6.69765e-11	yes			Mogs	Mogs	Mogs	chr6:83115505-83118898	KSR	ETP	OK	14.9703	21.7025	0.53576	-4.22067
											Abca17	0.0943833	0.0673582	0.0397412	0.0553062	0.0974986	0.135852	0.0947133	0.122954	0.0383686			Gadd45a	Gadd45a	Gadd45a	chr6:67035095-67080652	KSR	2i	OK	39.4225	21.2564	-0.891122	7.0571	1.7002e-12	7.00481e-11	yes			AA986860	AA986860	AA986860	chr1:130731975-130744622	KSR	ETP	OK	1.68691	3.7216	1.14154	-4.21236
											Abca2	1.8324	1.64928	1.72876	1.57426	2.20133	2.21478	1.87928	2.43224	2.0186			Serpine1	Serpine1	Serpine1	chr5:137061505-137072272	KSR	2i	OK	6.55976	2.27963	-1.52484	7.05299	1.75104e-12	7.18951e-11	yes			5730469M10Rik	5730469M10Rik	5730469M10Rik	chr14:40993739-41013775	KSR	ETP	OK	17.56	26.5188	0.594722	-4.20734
											Abca3	1.72499	1.98959	1.89804	1.71971	2.09441	1.83162	2.62916	3.71987	3.40015			Sall3	Sall3	Sall3	chr18:80966373-80986578	KSR	2i	OK	1.77235	4.06754	1.19849	-7.01073	2.37077e-12	9.70067e-11	yes			Hmgn2	Hmgn2	Hmgn2	chr4:133964738-133967991	KSR	ETP	OK	273.89	348.031	0.345621	-4.20576
											Abca4	0.0811597	0.0693354	0.0675036	0.191394	0.288867	0.174905	0.277863	0.20388	0.17806			Krt19	Krt19	Krt19	chr11:100140810-100145919	KSR	2i	OK	9.23039	0.556593	-4.0517	7.00617	2.44937e-12	9.9881e-11	yes			Elovl5	Elovl5	Elovl5	chr9:77917364-77984519	KSR	ETP	OK	39.2922	52.0842	0.406603	-4.2038
											Abca5	1.07946	1.22966	1.01369	1.13947	1.54592	1.47701	1.40593	1.34098	1.45038			Gdpd5	Gdpd5	Gdpd5	chr7:99381548-99460984	KSR	2i	OK	3.86775	0.82741	-2.22482	6.98321	2.88503e-12	1.17246e-10	yes			Hsph1	Hsph1	Hsph1	chr5:149616844-149636315	KSR	ETP	OK	60.6615	78.1893	0.366192	-4.2
											Abca6	0.261344	0.119255	0.0167048	0	0.0544802	0.274747	0.0663604	0.0153562	0.0166043			Nfxl1	Nfxl1	Nfxl1	chr5:72513303-72559645	KSR	2i	OK	14.6485	8.31064	-0.817717	6.96398	3.30802e-12	1.3398e-10	yes			Pga5	Pga5	Pga5	chr19:10668956-10678071	KSR	ETP	OK	4.84071	9.59828	0.987559	-4.19912
											Abca7	2.22891	2.43054	2.35	0.896312	1.26704	0.87105	1.32062	1.61028	1.65731			Galk1	Galk1	Galk1	chr11:115974724-116012719	KSR	2i	OK	48.59	29.3095	-0.72929	6.95738	3.46656e-12	1.39927e-10	yes			D10Wsu102e	D10Wsu102e	D10Wsu102e	chr10:83360220-83368835	KSR	ETP	OK	22.982	30.948	0.429339	-4.19683
											Abca8a	0	0	0	0.0225998	0.0154948	0.0378447	0.0612662	0.0418659	0.0158033			Tbrg1	Tbrg1	Tbrg1	chr9:37649181-37657312	KSR	2i	OK	117.201	80.9562	-0.533771	6.94642	3.74678e-12	1.50729e-10	yes			Lrrk1	Lrrk1	Lrrk1	chr7:66258746-66388341	KSR	ETP	OK	1.11642	2.12454	0.928272	-4.1942
											Abca8b	0	0.11396	0.0977158	0.0205106	0.0561019	0.0505814	0.027797	0.0509098	0.028356			Entpd4	Entpd4	Entpd4	chr14:69555400-69584992	KSR	2i	OK	23.5202	14.7331	-0.674835	6.92768	4.27813e-12	1.71527e-10	yes			Bckdha	Bckdha	Bckdha	chr7:25629851-25658761	KSR	ETP	OK	41.6098	56.9894	0.45377	-4.18536
											Abca9	0.0169194	0	0	0	0	0	0	0	0			Sord	Sord	Sord	chr2:122234838-122265337	KSR	2i	OK	24.7378	14.2066	-0.800153	6.92603	4.32809e-12	1.7295e-10	yes			Epb4.1l4a	Epb4.1l4a	Epb4.1l4a	chr18:33796326-34007206	KSR	ETP	OK	23.5129	31.639	0.428256	-4.16564
											Abcb10	4.80057	4.66729	5.24557	5.59275	5.29537	4.98336	6.00302	5.80063	6.13864			Tap1	Tap1	Tap1	chr17:34187555-34197225	KSR	2i	OK	4.97405	1.20243	-2.04846	6.9245	4.37517e-12	1.74248e-10	yes			Hspg2	Hspg2	Hspg2	chr4:137468802-137570630	KSR	ETP	OK	24.2555	30.9574	0.351969	-4.16469
											Abcb11	0	0.0151295	0	0.0242746	0	0	0.0336823	0.0464788	0.0170412			Rbmy1a1	Rbmy1a1	Rbmy1a1	chrY:3771672-3783271	KSR	2i	OK	8.91265	2.30845	-1.94893	6.91708	4.61031e-12	1.83003e-10	yes			Slc38a5	Slc38a5	Slc38a5	chrX:8271391-8280176	KSR	ETP	OK	0.809902	2.92535	1.85279	-4.16253
											Abcb1a	4.7481	5.02188	4.76567	1.10308	1.23374	0.964528	4.02472	3.72379	3.40691			Tfeb	Tfeb	Tfeb	chr17:47737036-47792416	KSR	2i	OK	12.056	22.0164	0.868819	-6.90939	4.86766e-12	1.92579e-10	yes			S100g	S100g	S100g	chrX:162407199-163352564	KSR	ETP	OK	3.6062	12.1378	1.75095	-4.13408
											Abcb1b	7.35128	7.2396	6.47906	6.13514	6.86196	6.65804	14.4033	13.4713	13.9247			Sfpq	Sfpq	Sfpq	chr4:127021300-127037014	KSR	2i	OK	151.176	178.467	0.239425	-6.90309	5.08837e-12	2.00647e-10	yes			Uqcrh	Uqcrh	Uqcrh	chr4:116066964-116075070	KSR	ETP	OK	261.085	338.902	0.376348	-4.13168
											Abcb4	0.0819043	0.012041	0.0397915	0.00286346	0.00517284	0.0473375	0.112014	0.0794373	0.0629472			Ephb4	Ephb4	Ephb4	chr5:137350108-137374522	KSR	2i	OK	7.55988	13.224	0.806727	-6.90193	5.13012e-12	2.01627e-10	yes			Spns2	Spns2	Spns2	chr11:72451637-72489904	KSR	ETP	OK	1.40772	3.13877	1.15684	-4.1286
											Abcb5	0.169414	0.227435	0.118311	0	0.0716996	0.0278851	0.561782	0.390507	0.400717			Agpat9	Agpat9	Agpat9	chr5:100846228-100899102	KSR	2i	OK	4.45244	0.303606	-3.87432	6.89716	5.30531e-12	2.07829e-10	yes			Cpm	Cpm	Cpm	chr10:117629499-117687352	KSR	ETP	OK	1.61416	3.00205	0.895166	-4.12502
											Abcb6	8.65704	9.2081	9.73537	9.06146	10.8839	10.1487	11.1285	9.61267	10.2709			Cryab	Cryab	Cryab	chr9:50752757-50756633	KSR	2i	OK	10.5087	1.84798	-2.50756	6.87845	6.05049e-12	2.36246e-10	yes			Lpgat1	Lpgat1	Lpgat1	chr1:191718023-191784257	KSR	ETP	OK	7.50933	9.59518	0.353626	-4.11922
											Abcb7	8.64955	10.6595	10.0405	9.98454	10.1369	10.5679	9.66713	9.31877	8.62164			Dgat2	Dgat2	Dgat2	chr7:99153662-99182713	KSR	2i	OK	6.62809	1.81859	-1.86577	6.86279	6.7526e-12	2.62801e-10	yes			Bcap29	Bcap29	Bcap29	chr12:31595353-31634658	KSR	ETP	OK	9.49231	15.2767	0.686503	-4.11546
											Abcb8	7.77896	8.47549	9.09356	7.76366	8.85944	6.98658	8.77407	9.64679	8.56823			Esrrb	Esrrb	Esrrb	chr12:86361116-86521628	KSR	2i	OK	119.748	161.524	0.431745	-6.84432	7.68408e-12	2.98082e-10	yes			Txndc17	Txndc17	Txndc17	chr11:72207553-72210487	KSR	ETP	OK	71.8176	94.8265	0.400954	-4.11545
											Abcb9	0.0428878	0	0.106615	0	0.110454	0.202613	0.342815	0.0315716	0.18057			Efnb2	Efnb2	Efnb2	chr8:8617438-8660773	KSR	2i	OK	3.51284	1.0217	-1.78167	6.82891	8.55649e-12	3.30851e-10	yes			Accn1	Accn1	Accn1	chr11:80880164-81968396	KSR	ETP	OK	0.116566	1.69849	3.86504	-4.11488
											Abcc1	4.2604	3.57024	4.05201	6.34821	7.61055	7.07002	5.08635	5.69509	4.9755			Ggta1	Ggta1	Ggta1	chr2:35400178-35461425	KSR	2i	OK	16.4728	10.2376	-0.686214	6.82386	8.86224e-12	3.41568e-10	yes			Tmem131	Tmem131	Tmem131	chr1:36792188-36939527	KSR	ETP	OK	36.1144	46.2957	0.358306	-4.11361
											Abcc10	2.62616	2.1745	2.33247	2.26533	2.83074	2.91816	2.28232	3.34124	3.16007			Ctgf	Ctgf	Ctgf	chr10:24595441-24598682	KSR	2i	OK	15.6018	7.91208	-0.979586	6.82122	9.02678e-12	3.46791e-10	yes			Rab6b	Rab6b	Rab6b	chr9:103112073-103185270	KSR	ETP	OK	3.03625	5.05611	0.735737	-4.11284
											Abcc12	0.0240109	0	0.0400404	0	0	0	0.0393787	0.0180096	0.0198398			Errfi1	Errfi1	Errfi1	chr4:150855090-150868880	KSR	2i	OK	9.34962	4.28507	-1.12559	6.81683	9.307e-12	3.5641e-10	yes			Cycs	Cycs	Cycs	chr6:50562562-50566474	KSR	ETP	OK	86.8821	110.254	0.343702	-4.09466
											Abcc2	0.26042	0.280266	0.247972	0.227825	0.302885	0.306782	0.702918	0.655965	0.548714			Ccng1	Ccng1	Ccng1	chr11:40748551-40755286	KSR	2i	OK	104.435	76.0356	-0.457856	6.79205	1.10552e-11	4.22003e-10	yes			Tnfaip8	Tnfaip8	Tnfaip8	chr18:49979426-50093229	KSR	ETP	OK	2.26198	4.31164	0.93065	-4.09277
											Abcc3	0.0247736	0.0357337	0.0614105	0.149338	0.2959	0.120366	0.179917	0.182343	0.12683			Ndrg2	Ndrg2	Ndrg2	chr14:51905270-51913488	KSR	2i	OK	5.62941	12.45	1.14509	-6.79117	1.11227e-11	4.23228e-10	yes			Npl	Npl	Npl	chr1:153503015-153549714	KSR	ETP	OK	28.0408	40.0303	0.513564	-4.08513
											Abcc4	18.9643	21.1175	18.8419	13.0711	15.961	14.543	17.2505	18.3049	17.3131			Bcl2l11	Bcl2l11	Bcl2l11	chr2:128126037-128162547	KSR	2i	OK	5.50156	2.54103	-1.11443	6.78771	1.13924e-11	4.32117e-10	yes			Fgf15	Fgf15	Fgf15	chr7:144896531-144900951	KSR	ETP	OK	1.22772	3.59794	1.55119	-4.0842
											Abcc5	22.2706	25.6907	24.3527	22.0935	23.9037	23.2151	20.441	21.2027	20.4793			Tgm3	Tgm3	Tgm3	chr2:130012373-130050399	KSR	2i	OK	4.72292	1.69496	-1.47843	6.78579	1.15452e-11	4.36526e-10	yes			Rpe	Rpe	Rpe	chr1:66700892-66817595	KSR	ETP	OK	30.0134	40.328	0.426172	-4.08426
											Abcc6	0	0.0196371	0	0.0340679	0	0.0809524	0.111866	0.0614434	0.0470141			B020031M17Rik	B020031M17Rik	B020031M17Rik	chr13:119949356-119950806	KSR	2i	OK	16.4254	4.90215	-1.74444	6.78342	1.17364e-11	4.42355e-10	yes			Hpdl	Hpdl	Hpdl	chr4:116819906-116821508	KSR	ETP	OK	6.90354	12.1828	0.81944	-4.08206
											Abcc8	0	0.0187282	0	0.0965888	0.0228905	0.0506444	0	0.138743	0.0454578			Klf10	Klf10	Klf10	chr15:38294412-38300707	KSR	2i	OK	17.1297	27.1144	0.662555	-6.76673	1.31728e-11	4.94933e-10	yes			Fst	Fst	Fst	chr13:114452261-114458730	KSR	ETP	OK	1.87443	4.16823	1.15298	-4.08108
											Abcc9	0.0146146	0	0.0124149	0.0960372	0.0567102	0.0149452	0.0538936	0.0441243	0.01267			Bmp1	Bmp1	Bmp1	chr14:70474554-70520260	KSR	2i	OK	4.27622	1.27697	-1.74362	6.76034	1.37672e-11	5.15645e-10	yes			Sdf2l1	Sdf2l1	Sdf2l1	chr16:17130137-17132383	KSR	ETP	OK	22.4356	34.1931	0.607914	-4.07868
											Abcd1	1.9989	2.26573	1.92997	4.52766	5.32689	5.56453	2.02153	2.53523	2.88961			Lmna	Lmna	Lmna	chr3:88481148-88503332	KSR	2i	OK	28.9804	17.5585	-0.722905	6.75654	1.41323e-11	5.27663e-10	yes			Mrpl50	Mrpl50	Mrpl50	chr4:49512596-49521083	KSR	ETP	OK	37.1564	49.5362	0.414873	-4.06629
											Abcd2	0.0508476	0.12381	0.113851	0.0848315	0.151282	0.0883947	0.138636	0.0933251	0.126956			Stmn3	Stmn3	Stmn3	chr2:181306458-181314500	KSR	2i	OK	3.18712	12.653	1.98915	-6.74312	1.55025e-11	5.77021e-10	yes			Pou4f2	Pou4f2	Pou4f2	chr8:78433008-78436652	KSR	ETP	OK	2.39641	4.57462	0.932776	-4.06539
											Abcd3	14.8668	17.1849	15.7212	16.3647	17.9413	19.5774	17.3181	18.1866	17.3361			Rcsd1	Rcsd1	Rcsd1	chr1:165648944-165708094	KSR	2i	OK	5.14701	1.26485	-2.02476	6.73956	1.58871e-11	5.89499e-10	yes			Lifr	Lifr	Lifr	chr15:7129571-7197489	KSR	ETP	OK	8.99996	12.265	0.446558	-4.06469
											Abcd4	7.7719	7.50095	9.01863	4.66568	5.39672	4.14753	5.72133	6.86243	7.08735			Pkp2	Pkp2	Pkp2	chr16:16213344-16272712	KSR	2i	OK	19.919	11.5833	-0.782092	6.73764	1.60976e-11	5.9546e-10	yes			Uspl1	Uspl1	Uspl1	chr5:149184559-149215434	KSR	ETP	OK	36.7798	41.9134	0.188498	-4.06462
											Abce1	79.298	90.6542	81.3662	99.9397	99.0554	106.405	92.498	89.2032	86.2963			Hdgfrp3	Hdgfrp3	Hdgfrp3	chr7:81859021-81934459	KSR	2i	OK	3.54445	1.39051	-1.34995	6.72553	1.74956e-11	6.45142e-10	yes			Abca1	Abca1	Abca1	chr4:53030788-53159895	KSR	ETP	OK	1.5544	2.52434	0.699547	-4.04437
											Abcf1	71.7696	74.1352	71.8586	58.5159	69.9492	67.1314	66.2393	69.9872	67.9218			Mylpf	Mylpf	Mylpf	chr7:127211607-127214287	KSR	2i	OK	110.401	164.109	0.571904	-6.72509	1.75486e-11	6.45142e-10	yes			Robo4	Robo4	Robo4	chr9:37402045-37414022	KSR	ETP	OK	3.00189	5.2463	0.805428	-4.03065
											Abcf2	82.67	83.33	82.7039	90.9754	95.9481	97.0121	94.3622	95.7744	92.9365			B3galnt1	B3galnt1	B3galnt1	chr3:69574185-69598861	KSR	2i	OK	9.41899	3.34582	-1.49321	6.72064	1.80924e-11	6.63093e-10	yes			Atn1	Atn1	Atn1	chr6:124742543-124756487	KSR	ETP	OK	13.3199	18.5593	0.478556	-4.03055
											Abcf3	11.2526	12.474	10.6361	12.231	12.3698	12.6541	12.8424	13.1663	14.2893			Gm1564	Gm1564	Gm1564	chr11:102665587-102682237	KSR	2i	OK	5.92871	2.67979	-1.1456	6.7035	2.03491e-11	7.43518e-10	yes			Rnf13	Rnf13	Rnf13	chr3:57736065-57835233	KSR	ETP	OK	11.933	17.6118	0.56159	-4.0243
											Abcg1	0.360931	0.33083	0.448635	0.428767	0.489981	0.575692	0.481012	0.671024	0.623164			Ptk2b	Ptk2b	Ptk2b	chr14:66153256-66281052	KSR	2i	OK	5.18711	1.9825	-1.38761	6.68754	2.26952e-11	8.26713e-10	yes			Pcsk6	Pcsk6	Pcsk6	chr7:65862135-66050386	KSR	ETP	OK	22.5595	29.9851	0.410509	-4.02314
											Abcg2	19.6084	23.0503	19.9792	22.1488	19.4783	22.3635	20.6282	18.8543	20.1099			Trap1a	Trap1a	Trap1a	chrX:139240225-139357738	KSR	2i	OK	119.337	169.119	0.502993	-6.66762	2.59988e-11	9.44174e-10	yes			Hs3st1	Hs3st1	Hs3st1	chr5:39613934-39644631	KSR	ETP	OK	5.30335	9.67747	0.867726	-4.02079
											Abcg3	0.0574234	0.0231058	0.0249822	0	0.0255083	0.0310015	0.0498479	0.0695459	0.0259904			Ppp2r5a	Ppp2r5a	Ppp2r5a	chr1:191325964-191397041	KSR	2i	OK	44.5602	30.2684	-0.557943	6.66441	2.65727e-11	9.62094e-10	yes			Nutf2	Nutf2	Nutf2	chr8:105860633-105880401	KSR	ETP	OK	19.5895	30.9544	0.660062	-4.0132
											Abcg4	0.405316	0.233674	0.279753	0.404783	0.215758	0.419565	0.439162	0.238636	0.121367			Cdkn1c	Cdkn1c	Cdkn1c	chr7:143458338-143461050	KSR	2i	OK	8.57041	2.53757	-1.75591	6.6601	2.73639e-11	9.87745e-10	yes			Ankrd34a	Ankrd34a	Ankrd34a	chr3:96596635-96599778	KSR	ETP	OK	0.857468	2.55122	1.57304	-3.99617
											Abcg5	0	0	0	0.0622103	0	0.0509901	0.0405426	0	0			Spint2	Spint2	Spint2	chr7:29256329-29281977	KSR	2i	OK	134.209	96.7545	-0.472077	6.64788	2.97349e-11	1.0701e-09	yes			Dgkk	Dgkk	Dgkk	chrX:6873483-6948363	KSR	ETP	OK	0.613907	1.36445	1.15223	-3.99244
											Abcg8	0	0	0	0	0	0	0	0.048884	0			Igf2bp3	Igf2bp3	Igf2bp3	chr6:49085217-49214954	KSR	2i	OK	32.4935	46.0755	0.503849	-6.6352	3.24061e-11	1.16273e-09	yes			Spg20	Spg20	Spg20	chr3:55112107-55137332	KSR	ETP	OK	7.47125	10.5698	0.500519	-3.98977
											Abhd1	1.3235	1.11579	1.492	1.73579	1.46766	0.725358	1.37631	1.61206	1.20839			Nxf2	Nxf2	Nxf2	chrX:134944530-134964754	KSR	2i	OK	9.0995	3.68658	-1.3035	6.62797	3.40341e-11	1.21748e-09	yes			Lamtor2	Lamtor2	Lamtor2	chr3:88549818-88552927	KSR	ETP	OK	84.3345	116.724	0.468907	-3.98843
											Abhd10	6.97102	7.58872	8.38202	7.80328	7.29358	8.72634	9.4441	7.80937	9.12256			Ubash3b	Ubash3b	Ubash3b	chr9:41013640-41157494	KSR	2i	OK	3.20808	0.321158	-3.32036	6.61002	3.84259e-11	1.37049e-09	yes			6030419C18Rik	6030419C18Rik	6030419C18Rik	chr9:58488602-58499742	KSR	ETP	OK	2.62794	5.42354	1.0453	-3.98575
											Abhd11	29.9811	27.6694	29.4429	15.5271	18.2906	17.2843	25.3511	25.9974	28.6314			Tns1	Tns1	Tns1	chr1:73910230-74124447	KSR	2i	OK	1.90476	3.67202	0.94696	-6.57555	4.84721e-11	1.72365e-09	yes			1110003E01Rik	1110003E01Rik	1110003E01Rik	chr5:65448754-65492835	KSR	ETP	OK	19.5983	27.7037	0.499353	-3.98205
											Abhd12	14.7988	15.2309	13.2879	14.7357	15.4502	15.1166	15.2309	15.46	15.1416			Slc20a1	Slc20a1	Slc20a1	chr2:129198772-129211612	KSR	2i	OK	87.3522	64.1475	-0.445451	6.55524	5.55509e-11	1.9695e-09	yes			Sowahc	Sowahc	Sowahc	chr10:59221921-59226433	KSR	ETP	OK	2.08112	3.70307	0.831358	-3.97476
											Abhd12b	0.099336	0	0	0	0	0	0	0	0			Asz1	Asz1	Asz1	chr6:18050963-18109061	KSR	2i	OK	17.3562	8.50818	-1.02853	6.55041	5.73781e-11	2.02826e-09	yes			Cmklr1	Cmklr1	Cmklr1	chr5:113612354-113650390	KSR	ETP	OK	7.42049	11.451	0.625888	-3.97441
											Abhd13	5.03196	6.08452	5.05277	7.23868	6.28245	7.33684	5.5787	6.12293	5.37446			Rarg	Rarg	Rarg	chr15:102234939-102257483	KSR	2i	OK	85.0362	63.2156	-0.427796	6.53547	6.34115e-11	2.23493e-09	yes			Acaca	Acaca	Acaca	chr11:84195437-84401651	KSR	ETP	OK	11.4053	14.9709	0.392465	-3.97066
											Abhd14a	14.997	15.4384	15.1877	13.3042	16.7827	15.6679	15.4204	13.2798	12.6543			Bmper	Bmper	Bmper	chr9:23223075-23485202	KSR	2i	OK	2.8869	0.173921	-4.05302	6.53486	6.36691e-11	2.23741e-09	yes			Rbbp5	Rbbp5	Rbbp5	chr1:132477366-132505665	KSR	ETP	OK	30.6547	40.0653	0.386245	-3.96783
											Abhd14b	1.35334	0.71628	0.686315	2.46511	1.83333	2.10607	1.64672	1.22649	1.44738			Abhd5	Abhd5	Abhd5	chr9:122351615-122381523	KSR	2i	OK	9.86049	4.84665	-1.02467	6.53349	6.42526e-11	2.25129e-09	yes			A930004D18Rik	A930004D18Rik	A930004D18Rik	chr2:18025188-18037741	KSR	ETP	OK	1.5678	3.37572	1.10645	-3.96308
											Abhd15	0.226468	0.153155	0.300407	0.214719	0.325214	0.344061	0.113764	0.105099	0.205681			Runx1	Runx1	Runx1	chr16:92601465-92826066	KSR	2i	OK	1.72974	0.155734	-3.4734	6.52761	6.68281e-11	2.33468e-09	yes			Shisa2	Shisa2	Shisa2	chr14:59625280-59631660	KSR	ETP	OK	5.81206	9.22309	0.6662	-3.95858
											Abhd16a	6.34596	6.67886	6.26258	7.76707	8.79047	7.43137	8.52306	8.65549	7.59814			Rdm1	Rdm1	Rdm1	chr11:101627948-101636081	KSR	2i	OK	30.0095	50.7645	0.758401	-6.52371	6.85891e-11	2.38922e-09	yes			Actn3	Actn3	Actn3	chr19:4861222-4877884	KSR	ETP	OK	3.55117	6.27244	0.820733	-3.95769
											Abhd16b	0.152453	0.0529686	0.0619995	0	0.303499	0	0.0579533	0.053087	0			F11r	F11r	F11r	chr1:171437560-171464593	KSR	2i	OK	28.3187	17.8242	-0.667915	6.51691	7.17684e-11	2.4927e-09	yes			Zbtb44	Zbtb44	Zbtb44	chr9:31030643-31075885	KSR	ETP	OK	13.4185	16.8592	0.329321	-3.95654
											Abhd2	4.26731	5.7659	6.08662	4.26735	4.49878	3.48278	6.47381	5.48631	5.95599			Pnp2	Pnp2	Pnp2	chr14:50956140-50964749	KSR	2i	OK	45.4008	27.0736	-0.745833	6.50931	7.54972e-11	2.61461e-09	yes			Tfb2m	Tfb2m	Tfb2m	chr1:179528055-179546267	KSR	ETP	OK	15.4459	22.0722	0.515012	-3.95465
											Abhd3	0.877741	1.54036	1.49042	1.96378	1.62847	2.0918	1.02601	1.21441	1.35836			1700030L20Rik	1700030L20Rik	1700030L20Rik	chr3:136435269-136449349	KSR	2i	OK	14.5811	4.48519	-1.70085	6.5061	7.71252e-11	2.66169e-09	yes			Polr2k	Polr2k	Polr2k	chr15:36174016-36177012	KSR	ETP	OK	57.8903	82.7616	0.515641	-3.94826
											Abhd4	15.225	15.6031	14.678	12.743	12.7892	13.2048	16.2924	16.2215	17.6904			Lrp11	Lrp11	Lrp11	chr10:7589799-7625477	KSR	2i	OK	10.9323	18.0535	0.723687	-6.50576	7.73022e-11	2.66169e-09	yes			Appbp2	Appbp2	Appbp2	chr11:85191309-85235120	KSR	ETP	OK	35.9325	47.4974	0.402559	-3.93835
											Abhd5	3.54256	4.77776	3.67004	9.18218	7.17592	6.84122	8.86386	8.31151	8.22893			Impact	Impact	Impact	chr18:12972251-12992948	KSR	2i	OK	40.7847	57.306	0.490657	-6.49291	8.41958e-11	2.88244e-09	yes			Vangl1	Vangl1	Vangl1	chr3:102156695-102204693	KSR	ETP	OK	13.0449	17.8499	0.452428	-3.93656
											Abhd6	4.08295	5.67449	3.14639	5.69487	5.41778	5.94748	5.56046	6.02481	6.13446			Steap3	Steap3	Steap3	chr1:120226415-120271082	KSR	2i	OK	11.9942	6.12516	-0.969518	6.49319	8.40403e-11	2.88244e-09	yes			2610305D13Rik	2610305D13Rik	2610305D13Rik	chr4:147611935-147642508	KSR	ETP	OK	72.1617	91.951	0.349631	-3.93636
											Abhd8	3.08194	2.83924	2.97749	2.78523	3.27883	2.85125	1.73542	3.48423	3.11965			Gm14458	Gm14458	Gm14458	chrX:8985899-8986755	KSR	2i	OK	20.7145	7.49029	-1.46755	6.49131	8.5095e-11	2.9049e-09	yes			Tmem64	Tmem64	Tmem64	chr4:15265819-15286753	KSR	ETP	OK	32.2317	41.4524	0.362978	-3.92967
											Abi1	17.9664	19.9979	19.6507	22.0984	22.5965	25.5583	20.6881	20.8856	20.089			Mdm2	Mdm2	Mdm2	chr10:117688904-117710716	KSR	2i	OK	57.4191	40.5063	-0.503383	6.48619	8.80365e-11	2.99675e-09	yes			Dmbx1	Dmbx1	Dmbx1	chr4:115915118-115939926	KSR	ETP	OK	0.662153	1.73355	1.3885	-3.92351
											Abi2	7.2038	8.04878	7.65163	7.07146	7.54247	7.8585	8.2445	7.76961	7.92614			Vps26a	Vps26a	Vps26a	chr10:62454842-62486805	KSR	2i	OK	34.1671	49.1469	0.524493	-6.47549	9.45024e-11	3.20771e-09	yes			6330407J23Rik	6330407J23Rik	6330407J23Rik	chr10:29143995-29199628	KSR	ETP	OK	5.32952	8.27997	0.63562	-3.92307
											Abi3	2.7395	2.24222	2.2833	2.32488	3.1022	1.95451	2.09253	2.57999	2.6702			Slc43a3	Slc43a3	Slc43a3	chr2:84936645-84958509	KSR	2i	OK	10.8109	5.09541	-1.08522	6.47242	9.64477e-11	3.26447e-09	yes			Nipa2	Nipa2	Nipa2	chr7:55842070-55962493	KSR	ETP	OK	21.8696	27.2657	0.318162	-3.92108
											Abi3bp	0.206982	0.197415	0.10755	0.114099	0.14772	0.157259	0.129922	0.189711	0.205429			Ly6a	Ly6a	Ly6a	chr15:74994876-74997888	KSR	2i	OK	27.8749	12.2221	-1.18948	6.45692	1.06853e-10	3.60644e-09	yes			Rbfa	Rbfa	Rbfa	chr18:80192263-80200619	KSR	ETP	OK	40.4395	55.5772	0.458726	-3.91065
											Abl1	15.7225	15.1725	16.4444	11.0889	13.6152	11.5248	14.9422	16.6926	15.4735			Gm2897	Gm2897	Gm2897	chr14:3049285-3077025	KSR	2i	OK	8.17392	3.10299	-1.39737	6.45338	1.09382e-10	3.68139e-09	yes			Slc41a1	Slc41a1	Slc41a1	chr1:131828011-131848864	KSR	ETP	OK	10.1886	14.1313	0.471943	-3.89899
											Abl2	5.21014	5.92368	6.14497	6.31218	6.82612	7.13767	5.6513	6.52981	6.27719			Thbs1	Thbs1	Thbs1	chr2:118111921-118127133	KSR	2i	OK	2.06	0.118969	-4.11399	6.44757	1.13656e-10	3.81451e-09	yes			Krcc1	Krcc1	Krcc1	chr6:71272018-71285319	KSR	ETP	OK	15.4051	22.3739	0.538407	-3.88987
											Ablim1	0.637862	0.701599	0.570887	0.761533	0.906087	0.813827	1.00145	1.08539	1.08214			Bcar1	Bcar1	Bcar1	chr8:111710474-111743849	KSR	2i	OK	20.3229	13.2106	-0.621408	6.43943	1.19922e-10	4.01353e-09	yes			Zfp239	Zfp239	Zfp239	chr6:117863076-117872766	KSR	ETP	OK	4.29767	7.04523	0.713091	-3.8822
											Ablim2	0.941431	0.562434	1.3633	1.04879	1.0611	0.732605	1.22066	0.747388	0.760063			Gm5634	Gm5634	Gm5634	chrX:8962133-8962975	KSR	2i	OK	22.8528	8.89151	-1.36187	6.43573	1.22879e-10	4.10099e-09	yes			Gse1	Gse1	Gse1	chr8:120488865-120589075	KSR	ETP	OK	8.17132	10.33	0.338194	-3.88157
											Ablim3	0.111658	0.126327	0.0920293	0.151996	0.0240306	0.107222	0.211078	0.276113	0.309521			Ifrd1	Ifrd1	Ifrd1	chr12:40203128-40223189	KSR	2i	OK	76.4472	52.8735	-0.531918	6.43194	1.25989e-10	4.1931e-09	yes			Lix1l	Lix1l	Lix1l	chr3:96601132-96629819	KSR	ETP	OK	3.96061	6.84638	0.789621	-3.88083
											Abo	0.171786	0.20855	0.234723	0.555541	0.664105	0.510465	0.671962	0.581442	0.707791			Lamc1	Lamc1	Lamc1	chr1:153218921-153332786	KSR	2i	OK	97.1629	73.4575	-0.403495	6.37912	1.78106e-10	5.91115e-09	yes			Mtmr7	Mtmr7	Mtmr7	chr8:40511782-40634792	KSR	ETP	OK	21.2604	28.3366	0.414493	-3.87604
											Abp1	0	0.0307986	0.162462	0.199788	0.0328708	0.0396146	0.0348564	0.145585	0.143246			Ak3	Ak3	Ak3	chr19:29020831-29048729	KSR	2i	OK	11.7063	6.0237	-0.958568	6.35881	2.03325e-10	6.72944e-09	yes			Cyct	Cyct	Cyct	chr2:76353942-76360448	KSR	ETP	OK	15.2643	25.9074	0.763204	-3.87274
											Abpa	0	0	0	0	0	0	0.437951	0.204865	0			Pea15a	Pea15a	Pea15a	chr1:172196728-172206781	KSR	2i	OK	10.1739	4.80392	-1.08259	6.35744	2.05147e-10	6.77098e-09	yes			Fam46a	Fam46a	Fam46a	chr9:85320438-85327150	KSR	ETP	OK	0.745273	1.65988	1.15523	-3.87008
											Abpb	0	0	0	0	0	0	0	0	0			Lrrc8c	Lrrc8c	Lrrc8c	chr5:105519470-105608954	KSR	2i	OK	4.92631	1.43069	-1.7838	6.33468	2.37829e-10	7.82806e-09	yes			Socs2	Socs2	Socs2	chr10:95411489-95416857	KSR	ETP	OK	21.4695	27.4022	0.352003	-3.86263
											Abpd	0	0	0	0	0	0	0	0	0			Pon2	Pon2	Pon2	chr6:5264623-5298373	KSR	2i	OK	8.36932	2.90139	-1.52837	6.32571	2.52064e-10	8.27379e-09	yes			Sdhd	Sdhd	Sdhd	chr9:50596339-50603849	KSR	ETP	OK	131.717	167.341	0.345352	-3.86208
											Abpe	0	0	0	0	0	0	0	0	0			Dsc2	Dsc2	Dsc2	chr18:20030797-20059505	KSR	2i	OK	2.795	0.74536	-1.90684	6.31653	2.67499e-10	8.73247e-09	yes			Cpxm2	Cpxm2	Cpxm2	chr7:132042809-132154741	KSR	ETP	OK	0.644522	1.78628	1.47066	-3.85845
											Abpg	0	0	0	0	0	0	0	0	0			Tbc1d13	Tbc1d13	Tbc1d13	chr2:30133870-30152013	KSR	2i	OK	21.8281	32.2218	0.56185	-6.31665	2.67299e-10	8.73247e-09	yes			B4galnt1	B4galnt1	B4galnt1	chr10:127165155-127172340	KSR	ETP	OK	4.61348	8.06023	0.804965	-3.85479
											Abph	0	0	0	0	0	0	0	0	0			Psd4	Psd4	Psd4	chr2:24385396-24408729	KSR	2i	OK	2.33643	0.497061	-2.23281	6.31479	2.70531e-10	8.80736e-09	yes			Ehbp1l1	Ehbp1l1	Ehbp1l1	chr19:5707373-5726317	KSR	ETP	OK	2.9837	4.99101	0.742227	-3.84666
											Abpz	0	0	0	0	0	0	0	0	0			Prrc2b	Prrc2b	Prrc2b	chr2:32151147-32234537	KSR	2i	OK	27.6305	35.8556	0.375935	-6.31056	2.78033e-10	9.027e-09	yes			Slc11a1	Slc11a1	Slc11a1	chr1:74375202-74386051	KSR	ETP	OK	0.921861	2.68267	1.54105	-3.843
											Abr	13.4406	14.5322	14.3907	12.3872	13.6024	12.8695	11.3988	12.3522	11.3			Nynrin	Nynrin	Nynrin	chr14:55854114-55874736	KSR	2i	OK	5.20151	8.4534	0.700602	-6.30902	2.80801e-10	9.09217e-09	yes			Sall4	Sall4	Sall4	chr2:168748331-168767201	KSR	ETP	OK	60.4355	69.8962	0.209819	-3.83235
											Abra	0	0.0487959	0.0533959	0.150032	0.0551592	0.0620904	0.162635	0.0494334	0			C77080	C77080	C77080	chr4:129189794-129248443	KSR	2i	OK	14.7412	21.8108	0.565186	-6.29813	3.01262e-10	9.72832e-09	yes			Dram1	Dram1	Dram1	chr10:88322803-88357075	KSR	ETP	OK	2.8174	5.09728	0.855361	-3.82393
											Abt1	12.1593	13.4329	12.4414	10.0158	9.50047	9.49015	29.3146	32.6797	31.3389			Trim44	Trim44	Trim44	chr2:102300118-102400900	KSR	2i	OK	18.8064	12.7553	-0.560129	6.29643	3.04574e-10	9.80877e-09	yes			Vash1	Vash1	Vash1	chr12:86678699-86695681	KSR	ETP	OK	4.87144	6.99204	0.521366	-3.81923
											Abtb1	14.1368	13.0052	13.8716	14.6193	15.0402	13.6743	13.5952	15.0389	16.4046			Gpx2	Gpx2	Gpx2	chr12:76792334-76795554	KSR	2i	OK	14.1073	4.81398	-1.55114	6.28728	3.23075e-10	1.03766e-08	yes			Tnfsf13	Tnfsf13	Tnfsf13	chr11:69682576-69696098	KSR	ETP	OK	1.16731	5.64544	2.27389	-3.81647
											Abtb2	1.08992	0.864409	1.00167	0.70054	0.596758	0.4656	0.804934	1.05754	0.925333			4933407C03Rik	4933407C03Rik	4933407C03Rik	chr8:117257018-117461505	KSR	2i	OK	26.783	19.8439	-0.432623	6.28654	3.24616e-10	1.03981e-08	yes			Etv1	Etv1	Etv1	chr12:38780257-38868215	KSR	ETP	OK	7.57196	10.762	0.507211	-3.81426
											Acaa1a	25.2117	25.6082	27.1982	19.7084	22.4787	21.3084	25.6523	23.6882	24.9649			Gpa33	Gpa33	Gpa33	chr1:166130459-166166510	KSR	2i	OK	17.9706	28.7777	0.679315	-6.28426	3.29411e-10	1.05235e-08	yes			Lhx6	Lhx6	Lhx6	chr2:36081952-36105408	KSR	ETP	OK	1.04963	2.45798	1.22759	-3.81142
											Acaa1b	5.12032	3.61004	3.3777	3.49436	4.02868	3.68777	4.3352	3.55348	4.91764			AU022751	AU022751	AU022751	chrX:6081217-6083420	KSR	2i	OK	17.0525	9.08713	-0.90809	6.27504	3.49535e-10	1.11367e-08	yes			Lamc1	Lamc1	Lamc1	chr1:153218921-153332786	KSR	ETP	OK	98.3171	121.687	0.307661	-3.81052
											Acaa2	37.9263	37.3217	40.0809	42.8178	44.1915	44.8763	39.7087	41.0486	36.9286			Tmem47	Tmem47	Tmem47	chrX:81070643-81097875	KSR	2i	OK	2.76734	5.95027	1.10446	-6.26843	3.64713e-10	1.15893e-08	yes			Adrb1	Adrb1	Adrb1	chr19:56722371-56724862	KSR	ETP	OK	1.26813	3.17414	1.32366	-3.80725
											Acaca	7.07369	9.04433	8.70134	11.3876	12.4886	12.0283	8.78215	9.49657	8.74427			Gm10406	Gm10406	Gm10406	chr14:7006114-7027449	KSR	2i	OK	9.11105	3.65718	-1.31689	6.26335	3.76789e-10	1.19413e-08	yes			Sfrp1	Sfrp1	Sfrp1	chr8:23411501-23449632	KSR	ETP	OK	14.9165	19.9591	0.420134	-3.80393
											Acacb	2.16792	2.11563	2.01707	2.23293	2.02095	2.37178	2.21627	2.26289	2.05822			Tcf23	Tcf23	Tcf23	chr5:30968676-30977018	KSR	2i	OK	2.21738	0.209607	-3.4031	6.25909	3.87243e-10	1.22401e-08	yes			Ldlrad3	Ldlrad3	Ldlrad3	chr2:101950200-102186377	KSR	ETP	OK	16.4549	22.0157	0.420011	-3.79905
											Acad10	2.24161	2.23866	3.26127	3.83088	4.29867	4.69347	4.03148	4.61697	3.46074			Xaf1	Xaf1	Xaf1	chr11:72301628-72313733	KSR	2i	OK	14.6336	23.4168	0.678263	-6.25506	3.97362e-10	1.25269e-08	yes			Mut	Mut	Mut	chr17:40934684-40961989	KSR	ETP	OK	21.1994	27.9474	0.398685	-3.79792
											Acad11	4.11013	4.62356	3.67013	6.79624	6.61094	6.9243	5.3263	6.62098	4.85516			Dazap2	Dazap2	Dazap2	chr15:100615661-100620761	KSR	2i	OK	39.9241	58.6084	0.553849	-6.25439	3.99075e-10	1.25477e-08	yes			Aacs	Aacs	Aacs	chr5:125475872-125517403	KSR	ETP	OK	8.74785	12.8308	0.552612	-3.7906
											Acad12	1.02917	1.2125	1.01714	3.42796	2.69472	2.56828	1.36538	1.99653	1.90629			Fxr1	Fxr1	Fxr1	chr3:34020078-34081326	KSR	2i	OK	145.718	163.671	0.167618	-6.25188	4.05531e-10	1.27173e-08	yes			Tyro3	Tyro3	Tyro3	chr2:119799513-119818103	KSR	ETP	OK	15.9637	21.4327	0.425018	-3.78875
											Acad8	7.06891	8.38897	7.15259	8.91561	8.1489	9.91305	9.09269	7.1119	8.58791			Ftl1	Ftl1	Ftl1	chr7:45457943-45459886	KSR	2i	OK	3216.72	4314.4	0.423567	-6.24645	4.19877e-10	1.31327e-08	yes			Lsm5	Lsm5	Lsm5	chr6:56701062-56704699	KSR	ETP	OK	151.948	199.411	0.392171	-3.78745
											Acad9	18.3795	20.1415	20.0909	24.8652	23.8488	24.8854	18.8335	18.6858	19.739			B020004J07Rik	B020004J07Rik	B020004J07Rik	chr4:101834968-101844022	KSR	2i	OK	6.3351	1.81102	-1.80657	6.24067	4.35714e-10	1.35925e-08	yes			Tgif1	Tgif1	Tgif1	chr17:70844204-70853532	KSR	ETP	OK	116.872	130.218	0.156008	-3.78638
											Acadl	9.52872	9.77413	10.4784	13.183	14.796	15.6651	10.4543	12.0526	12.048			BC016423	BC016423	BC016423	chr13:3538074-3611108	KSR	2i	OK	7.86567	4.98012	-0.65939	6.23473	4.52545e-10	1.40807e-08	yes			Zfp961	Zfp961	Zfp961	chr8:71951065-71970333	KSR	ETP	OK	59.3832	75.415	0.344796	-3.77764
											Acadm	85.5487	94.9017	85.4174	71.1768	73.1051	71.9559	84.9895	79.3686	79.6357			Gm3696	Gm3696	Gm3696	chr14:7083024-7105457	KSR	2i	OK	7.05445	2.53724	-1.47528	6.23213	4.60136e-10	1.42798e-08	yes			Otud4	Otud4	Otud4	chr8:79639675-79677755	KSR	ETP	OK	31.9811	34.6179	0.114298	-3.77721
											Acads	39.804	41.4718	38.375	26.0398	29.5614	24.9814	34.8054	34.8811	35.8308			Syce1	Syce1	Syce1	chr7:140777228-140787854	KSR	2i	OK	32.5616	19.2066	-0.761565	6.22959	4.67663e-10	1.44757e-08	yes			Srsf11	Srsf11	Srsf11	chr3:158010492-158036639	KSR	ETP	OK	65.7372	71.7104	0.125472	-3.77401
											Acadsb	8.72672	9.36789	8.91106	10.0951	10.1904	10.5085	9.50448	11.1412	9.79488			Ube2m	Ube2m	Ube2m	chr7:13035119-13038275	KSR	2i	OK	103.557	76.1205	-0.444064	6.22795	4.72591e-10	1.45905e-08	yes			Cyb5b	Cyb5b	Cyb5b	chr8:107150660-107187470	KSR	ETP	OK	42.9205	54.1433	0.335117	-3.76935
											Acadvl	9.59439	9.89973	10.712	11.8913	12.3717	12.2769	11.964	12.6736	12.7168			2510009E07Rik	2510009E07Rik	2510009E07Rik	chr16:21649044-21694665	KSR	2i	OK	0.419118	1.92167	2.19693	-6.21377	5.17283e-10	1.59291e-08	yes			Bcas3	Bcas3	Bcas3	chr11:85353163-85826058	KSR	ETP	OK	12.4201	16.5971	0.418256	-3.76652
											Acan	0.551534	0.548584	0.58682	0.479828	0.518245	0.57945	1.14649	1.17302	1.09464			Cisd3	Cisd3	Cisd3	chr11:97685951-97688625	KSR	2i	OK	55.8724	88.3158	0.660536	-6.20573	5.44427e-10	1.67219e-08	yes			Parvb	Parvb	Parvb	chr15:84232042-84315609	KSR	ETP	OK	33.7761	43.4736	0.364138	-3.76526
											Acap1	2.01411	1.6705	2.52904	1.78072	3.43006	2.43198	3.30601	2.23271	2.86751			Ppp2r2c	Ppp2r2c	Ppp2r2c	chr5:36868569-36955078	KSR	2i	OK	3.06598	0.873747	-1.81106	6.19852	5.69949e-10	1.74609e-08	yes			Manf	Manf	Manf	chr9:106887414-106891938	KSR	ETP	OK	49.8375	64.1731	0.364738	-3.76245
											Acap2	9.83696	11.4363	10.2173	11.1433	10.809	11.6264	9.65089	10.1515	9.94804			Greb1l	Greb1l	Greb1l	chr18:10325178-10562941	KSR	2i	OK	1.3169	0.317944	-2.0503	6.19692	5.7578e-10	1.75944e-08	yes			2810459M11Rik	2810459M11Rik	2810459M11Rik	chr1:86045862-86055456	KSR	ETP	OK	0.559952	1.71251	1.61274	-3.75981
											Acap3	3.25631	3.66686	3.1513	2.63464	3.30725	2.82237	2.94933	3.5343	3.02607			Fthl17	Fthl17	Fthl17	chrX:9033485-9034333	KSR	2i	OK	19.5884	7.32689	-1.41873	6.18947	6.03667e-10	1.83995e-08	yes			Ostc	Ostc	Ostc	chr3:130695916-130709444	KSR	ETP	OK	119.445	152.672	0.354087	-3.75307
											Acat1	4.11276	3.48819	3.86076	3.32226	3.78797	3.65632	4.79164	4.58263	4.06929			Gm4303	Gm4303	Gm4303	chr10:100345969-100362247	KSR	2i	OK	23.8255	8.80455	-1.43619	6.18771	6.10427e-10	1.85582e-08	yes			Hnrnpf	Hnrnpf	Hnrnpf	chr6:117900339-117925622	KSR	ETP	OK	532.983	596.975	0.163582	-3.74974
											Acat2	74.8643	71.3798	69.4985	75.4951	78.0892	76.8168	72.8068	62.8651	69.2899			Nucks1	Nucks1	Nucks1	chr1:131910457-131936321	KSR	2i	OK	68.4555	78.5045	0.197608	-6.17685	6.53929e-10	1.98303e-08	yes			Lgmn	Lgmn	Lgmn	chr12:102394097-102439697	KSR	ETP	OK	58.5901	75.465	0.365151	-3.74339
											Acat3	37.0977	35.2064	35.0172	36.4858	34.4779	32.8738	36.6654	36.6259	37.4183			Usp26	Usp26	Usp26	chrX:51753958-51801233	KSR	2i	OK	11.0921	6.52296	-0.765936	6.16211	7.17801e-10	2.17121e-08	yes			Mllt6	Mllt6	Mllt6	chr11:97663411-97685458	KSR	ETP	OK	17.6703	22.6377	0.357398	-3.7417
											Acbd3	10.0494	11.3779	9.49467	12.7285	13.7841	14.0216	10.4286	11.1036	10.5534			Cald1	Cald1	Cald1	chr6:34709443-34775469	KSR	2i	OK	22.5242	15.1205	-0.574975	6.15753	7.38868e-10	2.22929e-08	yes			Rnf145	Rnf145	Rnf145	chr11:44518963-44565520	KSR	ETP	OK	14.0933	19.0389	0.43394	-3.73937
											Acbd4	4.37684	3.93489	3.85585	4.0231	3.81445	3.25704	4.00766	3.8823	4.69786			Prps1	Prps1	Prps1	chrX:140456602-140476140	KSR	2i	OK	74.1641	52.4981	-0.498456	6.1555	7.4842e-10	2.25242e-08	yes			Zfp266	Zfp266	Zfp266	chr9:20495068-20521419	KSR	ETP	OK	7.82822	9.93337	0.343599	-3.72967
											Acbd5	4.84794	4.72005	4.726	6.67687	5.65704	6.37292	6.05091	5.49541	5.20671			Hmgb2	Hmgb2	Hmgb2	chr8:57511842-57515999	KSR	2i	OK	216.433	282.152	0.382552	-6.15082	7.70812e-10	2.31398e-08	yes			Plod2	Plod2	Plod2	chr9:92538800-92608427	KSR	ETP	OK	34.3237	40.3555	0.233561	-3.7185
											Acbd6	28.8644	32.3537	30.1331	24.9816	27.0007	27.7678	30.9093	36.7875	36.778			Fbn1	Fbn1	Fbn1	chr2:125300593-125506438	KSR	2i	OK	1.84739	0.729713	-1.34008	6.14572	7.96017e-10	2.38366e-08	yes			Mmachc	Mmachc	Mmachc	chr4:116702433-116708385	KSR	ETP	OK	10.0114	15.1514	0.597815	-3.71334
											Acbd7	1.65769	1.6576	0.736926	1.99195	1.20199	1.31873	1.17924	1.0784	1.71665			Sox17	Sox17	Sox17	chr1:4490927-4496413	KSR	2i	OK	3.21185	0.258627	-3.63446	6.13521	8.50487e-10	2.54041e-08	yes			2310014L17Rik	2310014L17Rik	2310014L17Rik	chr7:12927415-12931072	KSR	ETP	OK	1.50761	3.04519	1.01427	-3.71009
											Accn1	0	0.0331937	0.0378883	0.224072	0.154968	0	0.201694	0.153274	0.0398813			Gemin5	Gemin5	Gemin5	chr11:58120000-58168539	KSR	2i	OK	32.6528	26.6081	-0.295339	6.11897	9.41845e-10	2.80628e-08	yes			1810026B05Rik	1810026B05Rik	1810026B05Rik	chr7:73426651-73558395	KSR	ETP	OK	2.18959	3.6657	0.743424	-3.70917
											Accn2	1.97496	1.80147	1.72841	1.27921	1.45657	1.35964	1.73837	1.72025	2.02197			Rrbp1	Rrbp1	Rrbp1	chr2:143947394-144011263	KSR	2i	OK	31.323	22.4987	-0.477381	6.11179	9.85188e-10	2.92812e-08	yes			Mep1b	Mep1b	Mep1b	chr18:21072343-21100199	KSR	ETP	OK	3.27187	5.81693	0.830143	-3.7049
											Accn3	0	0	0.0622261	0	0.0608545	0	0	0.0538678	0			Pltp	Pltp	Pltp	chr2:164830729-164857708	KSR	2i	OK	21.4118	34.383	0.683291	-6.09609	1.08697e-09	3.2226e-08	yes			Vash2	Vash2	Vash2	chr1:190947645-190979296	KSR	ETP	OK	1.54463	2.95698	0.936861	-3.6998
											Accn4	0.0797774	0	0	0	0	0.041414	0	0	0.0356123			L1td1	L1td1	L1td1	chr4:98726753-98738486	KSR	2i	OK	154.957	202.778	0.388037	-6.0931	1.10745e-09	3.27519e-08	yes			Rnasel	Rnasel	Rnasel	chr1:153749425-153764221	KSR	ETP	OK	0.541139	1.34378	1.31223	-3.6935
											Accn5	0	0	0	0	0	0	0	0	0			Rprd1a	Rprd1a	Rprd1a	chr18:24484961-24530204	KSR	2i	OK	17.5018	11.4673	-0.609972	6.09252	1.1115e-09	3.27906e-08	yes			Krr1	Krr1	Krr1	chr10:111972694-111997264	KSR	ETP	OK	21.6068	27.6582	0.356225	-3.67635
											Accs	1.04807	1.21734	0.530715	0.514161	0.676272	0.479799	0.648659	0.698494	0.722019			Igfbp2	Igfbp2	Igfbp2	chr1:72824479-72852471	KSR	2i	OK	176.107	129.11	-0.447858	6.07954	1.20525e-09	3.54687e-08	yes			Camk1d	Camk1d	Camk1d	chr2:5293456-5714664	KSR	ETP	OK	5.44456	7.53954	0.469662	-3.67497
											Accsl	6.90551	6.85847	7.63543	5.75807	4.89247	6.55234	4.56136	4.71112	5.46431			Kifc3	Kifc3	Kifc3	chr8:95081200-95142540	KSR	2i	OK	9.57219	5.07758	-0.914707	6.07701	1.22446e-09	3.58574e-08	yes			Ubap2l	Ubap2l	Ubap2l	chr3:89998759-90052515	KSR	ETP	OK	75.9121	79.9503	0.0747733	-3.67249
											Acd	14.4326	16.2355	16.6464	11.5346	12.7557	13.0673	15.2864	15.8632	17.1859			Ncoa3	Ncoa3	Ncoa3	chr2:165992636-166073242	KSR	2i	OK	41.0754	30.6304	-0.423312	6.07706	1.22407e-09	3.58574e-08	yes			Fignl2	Fignl2	Fignl2	chr15:101050193-101054399	KSR	ETP	OK	6.86665	9.91698	0.530295	-3.66493
											Ace	0.702615	0.602945	0.476502	0.47083	0.854223	0.723801	1.19958	0.944183	0.980229			Gprasp1	Gprasp1	Gprasp1	chrX:135742691-135803468	KSR	2i	OK	15.0414	19.6314	0.384227	-6.0752	1.23833e-09	3.61749e-08	yes			Creb3l2	Creb3l2	Creb3l2	chr6:37331020-37442148	KSR	ETP	OK	5.26008	8.09997	0.622832	-3.65382
											Ace2	0.110132	0.0863027	0.0234363	0.0336001	0	0	0	0.0863305	0.0242127			Gtf2ird1	Gtf2ird1	Gtf2ird1	chr5:134357660-134456716	KSR	2i	OK	25.7103	18.5665	-0.469646	6.07082	1.27259e-09	3.70852e-08	yes			Fgf3	Fgf3	Fgf3	chr7:144838611-144843348	KSR	ETP	OK	2.87791	6.58114	1.19332	-3.64702
											Ace3	0	0	0	0	0	0	0	0	0			Cpe	Cpe	Cpe	chr8:64592550-64693040	KSR	2i	OK	11.6428	5.51939	-1.07685	6.0325	1.61443e-09	4.69323e-08	yes			Rnf165	Rnf165	Rnf165	chr18:77456109-77565136	KSR	ETP	OK	3.00583	4.48323	0.576775	-3.64469
											Acer1	0.410708	0.333481	0.463747	0.453255	0.340216	0.581341	0.479862	0.323459	0.415909			Tktl1	Tktl1	Tktl1	chrX:74177258-74208498	KSR	2i	OK	5.55211	1.83573	-1.59668	6.02647	1.67578e-09	4.85975e-08	yes			2310044G17Rik	2310044G17Rik	2310044G17Rik	chr12:86947042-86965365	KSR	ETP	OK	12.5614	16.3864	0.3835	-3.6375
											Acer2	1.23909	1.47832	1.45767	1.33337	0.858294	1.10684	1.10431	1.29032	1.34149			Gpr126	Gpr126	Gpr126	chr10:14402584-14545036	KSR	2i	OK	0.824026	2.20594	1.42063	-6.02577	1.68311e-09	4.86921e-08	yes			Nfkbie	Nfkbie	Nfkbie	chr17:45555715-45563168	KSR	ETP	OK	2.66106	5.00772	0.912151	-3.63562
											Acer3	1.82365	2.26727	2.3389	2.73692	2.94119	2.95121	2.4049	2.43903	2.42721			Gpcpd1	Gpcpd1	Gpcpd1	chr2:132529082-132578248	KSR	2i	OK	14.3673	9.11818	-0.655973	6.02348	1.70707e-09	4.92657e-08	yes			Tmem144	Tmem144	Tmem144	chr3:79813152-79842662	KSR	ETP	OK	3.17762	5.70045	0.84313	-3.6299
											Ache	0.0660599	0.0921396	0	0.376435	0.2707	0.299051	0.149241	0.185742	0.321503			Nfic	Nfic	Nfic	chr10:81396190-81427173	KSR	2i	OK	4.60138	7.62642	0.728938	-6.0164	1.78343e-09	5.13457e-08	yes			Mnd1	Mnd1	Mnd1	chr3:84087933-84155786	KSR	ETP	OK	25.299	37.46	0.566272	-3.62764
											Acin1	56.729	61.646	58.1692	46.7944	56.6941	52.8664	57.7941	57.1593	52.4624			Dlgap3	Dlgap3	Dlgap3	chr4:127169270-127237022	KSR	2i	OK	9.94987	16.116	0.695743	-6.01416	1.80822e-09	5.19342e-08	yes			Foxa2	Foxa2	Foxa2	chr2:148042877-148046969	KSR	ETP	OK	1.91024	4.1427	1.11681	-3.6228
											Acly	105.932	107.337	105.301	108.39	119.52	116.349	97.9021	97.937	93.787			Fblim1	Fblim1	Fblim1	chr4:141576061-141606052	KSR	2i	OK	52.3597	71.1344	0.442091	-6.01175	1.83535e-09	5.25869e-08	yes			4933403F05Rik	4933403F05Rik	4933403F05Rik	chr18:68260184-68300333	KSR	ETP	OK	5.97203	7.9179	0.406897	-3.61507
											Acmsd	0.221081	0.1979	0.185346	0.161711	0.150696	0.0923574	0.14502	0.164748	0.309982			Arhgef5	Arhgef5	Arhgef5	chr6:43265643-43289320	KSR	2i	OK	1.93511	0.487183	-1.98988	6.00728	1.88664e-09	5.39273e-08	yes			Ssr3	Ssr3	Ssr3	chr3:65379656-65392553	KSR	ETP	OK	94.7732	116.864	0.302286	-3.61196
											Acn9	10.2509	8.45367	7.35231	8.08552	9.356	9.6217	9.42711	10.261	6.25889			Glrx	Glrx	Glrx	chr13:75839885-75850151	KSR	2i	OK	31.3724	18.174	-0.78762	5.99514	2.03313e-09	5.79757e-08	yes			Hsd17b12	Hsd17b12	Hsd17b12	chr2:94032696-94157909	KSR	ETP	OK	55.8661	71.36	0.353143	-3.59981
											Acnat1	0.21958	0.197154	0.203426	0.25049	0.243302	0.308623	0.18604	0.270875	0.421845			Prss50	Prss50	Prss50	chr9:110857966-110864628	KSR	2i	OK	10.7735	3.96079	-1.44363	5.99412	2.04594e-09	5.82022e-08	yes			9330159F19Rik	9330159F19Rik	9330159F19Rik	chr10:29211642-29230779	KSR	ETP	OK	1.38026	2.41225	0.80544	-3.5865
											Acnat2	0	0	0	0	0	0	0	0	0			Hnf1b	Hnf1b	Hnf1b	chr11:83850868-83905815	KSR	2i	OK	3.67574	0.29246	-3.65173	5.98832	2.12024e-09	6.01726e-08	yes			Gli1	Gli1	Gli1	chr10:127323726-127341579	KSR	ETP	OK	3.36795	5.47234	0.700288	-3.58511
											Aco1	15.3873	15.427	16.0135	8.78021	10.6736	10.314	12.4629	13.3827	12.845			Phyh	Phyh	Phyh	chr2:4918995-4938743	KSR	2i	OK	31.8113	48.5616	0.610276	-5.97027	2.36859e-09	6.70613e-08	yes			Aifm1	Aifm1	Aifm1	chrX:48474943-48513426	KSR	ETP	OK	34.7662	45.1717	0.377732	-3.5849
											Aco2	115.75	113.605	111.035	92.673	101.009	100.751	105.116	112.321	108.593			1110021L09Rik	1110021L09Rik	1110021L09Rik	chr10:23796985-23827968	KSR	2i	OK	4.20355	8.56952	1.02761	-5.96773	2.40578e-09	6.79535e-08	yes			Cdc42ep4	Cdc42ep4	Cdc42ep4	chr11:113726849-113751815	KSR	ETP	OK	17.3412	23.1808	0.418725	-3.58192
											Acot1	4.81435	4.36158	4.0994	2.17969	1.75265	2.13982	6.85551	5.20371	6.23843			Cnn2	Cnn2	Cnn2	chr10:79697304-80369637	KSR	2i	OK	24.3724	14.3319	-0.76602	5.96375	2.4651e-09	6.94647e-08	yes			Celf4	Celf4	Celf4	chr18:25477619-25753983	KSR	ETP	OK	2.25039	3.89598	0.791815	-3.57982
											Acot10	0.919466	0.908009	0.744097	0.858529	0.686928	0.405853	0.634042	0.778332	0.604691			Phldb2	Phldb2	Phldb2	chr16:45746230-45844378	KSR	2i	OK	3.46322	1.50322	-1.20406	5.9521	2.64718e-09	7.44201e-08	yes			Psmb9	Psmb9	Psmb9	chr17:34182098-34187330	KSR	ETP	OK	5.63703	11.3458	1.00916	-3.5742
											Acot11	0.319109	0.52413	0.468927	0.610861	0.652661	0.620046	0.637654	0.6758	0.742644			Dio3	Dio3	Dio3	chr12:110279229-110281097	KSR	2i	OK	6.43101	1.84551	-1.80102	5.94708	2.72975e-09	7.65611e-08	yes			Snx2	Snx2	Snx2	chr18:53176364-53220860	KSR	ETP	OK	87.818	109.381	0.316768	-3.57404
											Acot12	0	0	0	0	0	0	0.030534	0	0.0316989			Myst4	Myst4	Myst4	chr14:21499769-21672478	KSR	2i	OK	33.5956	43.0488	0.357701	-5.94012	2.84807e-09	7.96925e-08	yes			Fam89b	Fam89b	Fam89b	chr19:5728086-5729666	KSR	ETP	OK	11.5019	17.9445	0.641667	-3.57158
											Acot13	25.8941	21.5137	19.3269	27.3105	23.6979	24.76	21.0543	20.5173	19.3683			Phc1	Phc1	Phc1	chr6:122317730-122337015	KSR	2i	OK	91.2247	81.4377	-0.163727	5.93658	2.91034e-09	8.12447e-08	yes			Dock3	Dock3	Dock3	chr9:106892824-107231909	KSR	ETP	OK	1.29408	2.09523	0.695183	-3.571
											Acot2	1.74918	1.67684	1.684	1.28473	1.69945	1.46026	2.72488	3.10514	2.70155			Nlrp4c	Nlrp4c	Nlrp4c	chr7:6045160-6105149	KSR	2i	OK	7.5478	3.88112	-0.959582	5.93105	3.01008e-09	8.38333e-08	yes			Map4k3	Map4k3	Map4k3	chr17:80580511-80728093	KSR	ETP	OK	13.1685	17.5102	0.411104	-3.56889
											Acot3	0.168416	0.150873	0.110124	0.235506	0.193357	0.0635104	0.131155	0.0797629	0.0712314			Fam169a	Fam169a	Fam169a	chr13:97067286-97137926	KSR	2i	OK	36.905	28.7753	-0.358985	5.92244	3.17203e-09	8.8138e-08	yes			Rnd3	Rnd3	Rnd3	chr2:51130438-51149111	KSR	ETP	OK	14.0791	19.3064	0.455522	-3.56848
											Acot4	0.149231	0.0429463	0.0457953	0.0023605	0.0677483	0.23975	0.202425	0.0951609	0.0917234			Zfp36l2	Zfp36l2	Zfp36l2	chr17:84183927-84187947	KSR	2i	OK	25.2313	16.972	-0.57206	5.92115	3.19702e-09	8.86264e-08	yes			Slc5a11	Slc5a11	Slc5a11	chr7:123214865-123273251	KSR	ETP	OK	3.27584	5.70608	0.800635	-3.56579
											Acot5	0.011253	0.0370509	0.0277298	0.0874084	0.0582347	0.000461706	0.0334775	0.23141	0.0652339			Slfn9	Slfn9	Slfn9	chr11:82980302-82991830	KSR	2i	OK	1.76027	4.2615	1.27556	-5.90941	3.43341e-09	9.49592e-08	yes			Dgke	Dgke	Dgke	chr11:89037581-89060748	KSR	ETP	OK	7.18331	9.89545	0.462116	-3.56571
											Acot6	0.0702058	0.189037	0.062746	0.132269	0.0869453	0.0239886	0.212806	0.161898	0.257165			Clcn5	Clcn5	Clcn5	chrX:7158411-7319358	KSR	2i	OK	4.31425	1.76181	-1.29205	5.90491	3.52833e-09	9.69906e-08	yes			1110034A24Rik	1110034A24Rik	1110034A24Rik	chr12:69189837-69199868	KSR	ETP	OK	13.5904	19.1083	0.491611	-3.56382
											Acot7	48.4023	42.032	44.3654	26.382	33.0276	30.487	43.8422	40.211	37.2619			Dpp4	Dpp4	Dpp4	chr2:62330072-62412231	KSR	2i	OK	17.2168	11.7504	-0.551116	5.90478	3.53121e-09	9.69906e-08	yes			Rarg	Rarg	Rarg	chr15:102234939-102257483	KSR	ETP	OK	86.0328	102.262	0.249309	-3.56304
											Acot8	13.2626	11.3154	12.8884	10.8502	10.316	10.802	13.7818	12.8598	14.2114			Zfp365	Zfp365	Zfp365	chr10:67886104-67912662	KSR	2i	OK	8.1551	4.536	-0.846282	5.90525	3.52107e-09	9.69906e-08	yes			Pip4k2b	Pip4k2b	Pip4k2b	chr11:97715156-97744704	KSR	ETP	OK	25.3155	31.9767	0.337002	-3.55859
											Acot9	38.5283	43.338	40.8604	26.7635	25.5578	27.8186	34.0889	31.9885	32.6067			Btbd2	Btbd2	Btbd2	chr10:80642616-80657071	KSR	2i	OK	8.18608	14.1759	0.792197	-5.90377	3.55278e-09	9.71365e-08	yes			Mrps22	Mrps22	Mrps22	chr9:98588729-98601679	KSR	ETP	OK	34.7567	47.1572	0.440188	-3.55757
											Acox1	8.8264	11.039	9.9331	6.824	7.01738	7.79691	7.59922	7.5615	6.94836			Fzd10	Fzd10	Fzd10	chr5:128601105-128604093	KSR	2i	OK	8.3398	14.1907	0.76686	-5.90384	3.5513e-09	9.71365e-08	yes			Efna3	Efna3	Efna3	chr3:89314950-89322879	KSR	ETP	OK	6.25305	11.1234	0.83096	-3.5433
											Acox2	0.205855	0.0359444	0.0421108	0.0578808	0	0	0.167526	0.195656	0.0435626			Gm5796	Gm5796	Gm5796	chr14:4023940-4041368	KSR	2i	OK	7.5284	2.74675	-1.45462	5.89793	3.68081e-09	1.00407e-07	yes			Esyt3	Esyt3	Esyt3	chr9:99309966-99358530	KSR	ETP	OK	3.9056	5.90463	0.596305	-3.54243
											Acox3	3.70428	4.28653	4.11584	3.38709	3.47978	3.66446	2.47221	3.16327	3.08435			Plod3	Plod3	Plod3	chr5:136982200-136996646	KSR	2i	OK	21.7902	14.2238	-0.615378	5.88933	3.87756e-09	1.05533e-07	yes			Hrsp12	Hrsp12	Hrsp12	chr15:34484021-34495246	KSR	ETP	OK	24.6265	35.1798	0.514534	-3.53729
											Acoxl	0.127819	0.121069	0.174773	0.0506824	0.0722971	0.0410479	0.20647	0.127004	0.213864			Gm4858	Gm4858	Gm4858	chr3:93068822-93075505	KSR	2i	OK	4.66971	0.967338	-2.27124	5.88687	3.9358e-09	1.06875e-07	yes			Stard4	Stard4	Stard4	chr18:33201420-33213816	KSR	ETP	OK	12.2248	16.8169	0.460099	-3.53594
											Acp1	28.4475	29.2247	29.8715	34.2282	29.0696	31.0894	29.2506	29.4173	29.3074			F3	F3	F3	chr3:121723536-121735052	KSR	2i	OK	9.82512	4.22683	-1.2169	5.88454	3.99159e-09	1.08144e-07	yes			Mfsd1	Mfsd1	Mfsd1	chr3:67582767-67604231	KSR	ETP	OK	38.056	48.3069	0.344107	-3.53413
											Acp2	2.58272	2.74736	3.1555	2.77236	3.02331	2.94278	2.97363	2.7901	2.54101			D630045M09Rik	D630045M09Rik	D630045M09Rik	chr13:73344664-73347384	KSR	2i	OK	18.369	9.22242	-0.994056	5.88317	4.02474e-09	1.08795e-07	yes			Wnt6	Wnt6	Wnt6	chr1:74771891-74785319	KSR	ETP	OK	4.59125	7.81296	0.766983	-3.53101
											Acp5	4.3527	6.04101	7.50946	4.9104	4.95983	4.24649	4.96757	5.09757	6.07865			Set	Set	Set	chr2:30061995-30072577	KSR	2i	OK	596.264	731.695	0.295292	-5.87808	4.15053e-09	1.1169e-07	yes			Mdga1	Mdga1	Mdga1	chr17:29827957-29887882	KSR	ETP	OK	0.929337	1.6631	0.839602	-3.52888
											Acp6	91.1612	91.8654	91.9683	72.9089	75.4784	73.4879	90.6348	86.5584	85.4418			Susd2	Susd2	Susd2	chr10:75636618-75644008	KSR	2i	OK	10.1049	5.52651	-0.870616	5.87809	4.15019e-09	1.1169e-07	yes			Jagn1	Jagn1	Jagn1	chr6:113442516-113448229	KSR	ETP	OK	36.7805	46.7604	0.346347	-3.5271
											Acpl2	0.632086	0.703819	0.830324	0.319278	0.570141	0.485897	0.634937	0.552006	0.747166			Slc30a4	Slc30a4	Slc30a4	chr2:122681238-122702663	KSR	2i	OK	2.64073	0.991709	-1.41295	5.86491	4.49371e-09	1.20654e-07	yes			Mageb4	Mageb4	Mageb4	chrX:86250255-86256219	KSR	ETP	OK	10.5613	15.0438	0.510386	-3.52679
											Acpp	0.324155	0.614856	0.539981	1.91185	1.31852	1.20425	1.79642	1.26399	1.31091			Map4k4	Map4k4	Map4k4	chr1:39900912-40026310	KSR	2i	OK	33.1598	27.5414	-0.267832	5.86112	4.59763e-09	1.23167e-07	yes			Kif26a	Kif26a	Kif26a	chr12:112146207-112181747	KSR	ETP	OK	2.47016	3.78793	0.616805	-3.52436
											Acpt	0	0.069357	0	0.114979	0	0	0	0	0			Rassf4	Rassf4	Rassf4	chr6:116633007-116673836	KSR	2i	OK	1.69239	0.467567	-1.85581	5.86066	4.61028e-09	1.2323e-07	yes			Hmgb2	Hmgb2	Hmgb2	chr8:57511842-57515999	KSR	ETP	OK	219.463	266.617	0.280792	-3.52431
											Acr	0.0830147	0	0	0	0	0	0	0.0558721	0.270528			Socs2	Socs2	Socs2	chr10:95411489-95416857	KSR	2i	OK	21.1844	30.4454	0.523224	-5.85849	4.67086e-09	1.2457e-07	yes			Hsp90b1	Hsp90b1	Hsp90b1	chr10:86690840-86705444	KSR	ETP	OK	260.164	316.248	0.281633	-3.51874
											Acrbp	2.78925	2.92026	3.5363	3.48771	3.67566	3.20654	3.9036	4.61396	4.02556			Acsl5	Acsl5	Acsl5	chr19:55253368-55296628	KSR	2i	OK	5.67251	2.41754	-1.23045	5.8544	4.78723e-09	1.27389e-07	yes			Ube2d3	Ube2d3	Ube2d3	chr3:135438758-135467178	KSR	ETP	OK	199.401	242.451	0.282016	-3.51525
											Acrv1	0	0.0639974	0	0.1144	0.0789964	0	0	0	0			Ddr1	Ddr1	Ddr1	chr17:35681566-35704139	KSR	2i	OK	5.11652	2.21524	-1.2077	5.84541	5.05308e-09	1.33904e-07	yes			Far1	Far1	Far1	chr7:113513861-113570458	KSR	ETP	OK	20.3073	26.0909	0.36155	-3.50835
											Acsbg1	0.230828	0.158567	0.37769	0.269287	0.347785	0.168095	0.294695	0.275611	0.576414			Hnrnpa2b1	Hnrnpa2b1	Hnrnpa2b1	chr6:51460434-51469894	KSR	2i	OK	528.789	609.486	0.204901	-5.84514	5.0614e-09	1.33904e-07	yes			Dnajb11	Dnajb11	Dnajb11	chr16:22857844-22879634	KSR	ETP	OK	51.9173	65.1975	0.328602	-3.50262
											Acsbg2	0.317818	0.453244	0.45844	0.105074	0.197597	0.340856	0.188458	0.212235	0.502305			Plp2	Plp2	Plp2	chrX:7658532-7671278	KSR	2i	OK	112.959	158.195	0.485901	-5.845	5.06567e-09	1.33904e-07	yes			Cmas	Cmas	Cmas	chr6:142756685-142775714	KSR	ETP	OK	40.5019	52.6246	0.377748	-3.49889
											Acsf2	10.4466	11.251	13.5654	12.4209	13.8258	13.9415	11.0546	11.976	10.771			Tes	Tes	Tes	chr6:17065148-17105825	KSR	2i	OK	5.60712	1.95155	-1.52264	5.84421	5.08984e-09	1.34246e-07	yes			Mdh1	Mdh1	Mdh1	chr11:21556691-21571934	KSR	ETP	OK	93.9117	116.582	0.311966	-3.49727
											Acsf3	5.55188	4.45022	5.42641	5.07423	4.77647	5.56175	5.15656	5.21325	5.6528			Id1	Id1	Id1	chr2:152736273-152737410	KSR	2i	OK	43.385	25.0576	-0.791947	5.84216	5.15286e-09	1.35609e-07	yes			Gcsh	Gcsh	Gcsh	chr8:116981827-116993449	KSR	ETP	OK	108.382	134.998	0.316817	-3.49399
											Acsl1	6.76366	6.91533	7.46661	6.45045	6.70459	6.36627	5.83421	6.78174	6.40059			Zic3	Zic3	Zic3	chrX:58030627-58036630	KSR	2i	OK	34.6208	24.773	-0.482869	5.83537	5.36705e-09	1.40935e-07	yes			Nfya	Nfya	Nfya	chr17:48386884-48409820	KSR	ETP	OK	17.1005	21.3949	0.323228	-3.49376
											Acsl3	19.0135	19.8082	18.7472	20.902	22.1287	22.6028	18.2191	18.621	18.0613			Trib1	Trib1	Trib1	chr15:59648653-59657099	KSR	2i	OK	9.75823	5.61915	-0.796267	5.8325	5.46017e-09	1.43066e-07	yes			Tbkbp1	Tbkbp1	Tbkbp1	chr11:97136170-97149712	KSR	ETP	OK	2.91192	4.9002	0.750868	-3.48947
											Acsl4	6.15876	7.36653	6.67245	12.8419	12.5963	12.3779	8.74176	8.53202	7.71531			Timp3	Timp3	Timp3	chr10:86048745-86498896	KSR	2i	OK	2.80774	1.01146	-1.47297	5.82985	5.54779e-09	1.45044e-07	yes			Tia1	Tia1	Tia1	chr6:86404218-86433405	KSR	ETP	OK	10.3941	13.6814	0.39646	-3.48026
											Acsl5	2.00082	1.84488	1.8277	2.64377	3.3866	2.36631	5.11546	4.33557	4.11551			Ctsh	Ctsh	Ctsh	chr9:90054266-90076095	KSR	2i	OK	6.05882	0.303576	-4.31891	5.82035	5.87238e-09	1.53195e-07	yes			Tceal8	Tceal8	Tceal8	chrX:136168983-136172251	KSR	ETP	OK	24.6702	32.1223	0.380808	-3.474
											Acsl6	2.67177	3.62866	2.46262	4.73712	5.41874	4.61053	4.10602	4.01258	4.59287			Fscn1	Fscn1	Fscn1	chr5:142960354-142973189	KSR	2i	OK	152.886	198.772	0.378663	-5.81421	6.0922e-09	1.58583e-07	yes			Cxcl12	Cxcl12	Cxcl12	chr6:117168534-117181368	KSR	ETP	OK	0.575415	1.83422	1.6725	-3.46967
											Acsm1	0	0	0	0	0	0	0	0	0			Gm9	Gm9	Gm9	chrX:37208501-37211041	KSR	2i	OK	5.89072	1.45116	-2.02124	5.80949	6.2663e-09	1.6276e-07	yes			Ints8	Ints8	Ints8	chr4:11191353-11254259	KSR	ETP	OK	18.9626	22.7809	0.264674	-3.46906
											Acsm2	0	0.012044	0.0538266	0	0.0549209	0.016292	0	0	0.0548115			Sall4	Sall4	Sall4	chr2:168748331-168767201	KSR	2i	OK	59.6482	47.9606	-0.31463	5.80277	6.52277e-09	1.69054e-07	yes			Dnajc10	Dnajc10	Dnajc10	chr2:80315465-80354055	KSR	ETP	OK	34.811	43.5225	0.32222	-3.46561
											Acsm3	0.0780062	0	0.0631686	0	0	0	0.163469	0	0.0342149			Rrm2	Rrm2	Rrm2	chr12:24708253-24714146	KSR	2i	OK	186.047	240.868	0.372577	-5.80234	6.53961e-09	1.69124e-07	yes			Fubp3	Fubp3	Fubp3	chr2:31572724-31617519	KSR	ETP	OK	72.1969	88.6069	0.295481	-3.46451
											Acsm4	0.82043	0.767441	1.13574	1.11337	1.25158	1.32322	0.964861	1.33606	1.4753			Smtnl2	Smtnl2	Smtnl2	chr11:72390113-72411713	KSR	2i	OK	18.9261	28.5059	0.590881	-5.79911	6.6668e-09	1.72041e-07	yes			Ctsz	Ctsz	Ctsz	chr2:174415803-174438992	KSR	ETP	OK	53.8019	69.2252	0.363641	-3.46023
											Acsm5	0	0	0	0	0	0	0	0	0			Actg1	Actg1	Actg1	chr11:120345689-120348484	KSR	2i	OK	1019.92	792.102	-0.364698	5.79735	6.73699e-09	1.73478e-07	yes			Txndc12	Txndc12	Txndc12	chr4:108834677-108862119	KSR	ETP	OK	44.8904	59.1058	0.396892	-3.45382
											Acss1	6.47493	5.80078	5.72749	2.51695	2.2151	2.29821	1.79287	2.19757	1.87177			Cgn	Cgn	Cgn	chr3:94760069-94786515	KSR	2i	OK	4.37894	2.0799	-1.07407	5.7868	7.17391e-09	1.84331e-07	yes			Fam84b	Fam84b	Fam84b	chr15:60818995-60831400	KSR	ETP	OK	1.036	1.92229	0.891801	-3.45304
											Acss2	6.47015	6.63134	8.07075	2.03894	2.30079	2.52668	5.52782	5.64531	4.48724			Rnf128	Rnf128	Rnf128	chrX:139563339-139673145	KSR	2i	OK	5.13257	1.85127	-1.47117	5.77746	7.58367e-09	1.94441e-07	yes			Sesn1	Sesn1	Sesn1	chr10:41810573-41908436	KSR	ETP	OK	13.6241	17.5989	0.369318	-3.45
											Acss3	0	0	0.038296	0	0.038328	0.045375	0	0	0.152743			Adamts7	Adamts7	Adamts7	chr9:90162977-90200102	KSR	2i	OK	2.41416	0.789458	-1.61259	5.77393	7.74425e-09	1.98133e-07	yes			Mob4	Mob4	Mob4	chr1:55131244-55154899	KSR	ETP	OK	24.1808	31.311	0.372809	-3.4377
											Acta1	0.668364	0.536157	0.534441	1.11023	1.47145	2.17972	5.14376	5.14708	4.6052			Hnrnph2	Hnrnph2	Hnrnph2	chrX:134601285-134607054	KSR	2i	OK	39.5661	55.0005	0.475181	-5.77307	7.78379e-09	1.9872e-07	yes			Ipo11	Ipo11	Ipo11	chr13:106794438-106936915	KSR	ETP	OK	32.8372	40.9853	0.319775	-3.43058
											Acta2	0.569656	0.944472	0.710502	9.05753	9.68877	9.58036	14.2371	14.2066	13.0019			Rab27a	Rab27a	Rab27a	chr9:73044864-73097592	KSR	2i	OK	8.17887	4.15891	-0.975697	5.7665	8.0934e-09	2.06183e-07	yes			Wdr6	Wdr6	Wdr6	chr9:108569891-108578670	KSR	ETP	OK	55.6296	68.517	0.300609	-3.43049
											Actb	898.981	891.12	862.343	690.965	708.417	736.53	802.479	700.948	817.855			Gas6	Gas6	Gas6	chr8:13465373-13494535	KSR	2i	OK	7.84653	3.52131	-1.15594	5.76551	8.14091e-09	2.06952e-07	yes			Itpa	Itpa	Itpa	chr2:130667840-130681614	KSR	ETP	OK	73.4646	93.7692	0.352065	-3.42902
											Actbl2	0	0	0	0	0	0	0	0	0			Mmp2	Mmp2	Mmp2	chr8:92827327-92853420	KSR	2i	OK	4.65676	1.70372	-1.45064	5.75568	8.62927e-09	2.18901e-07	yes			Ube2v2	Ube2v2	Ube2v2	chr16:15550985-15594518	KSR	ETP	OK	16.7713	21.0807	0.329925	-3.4279
											Actc1	0.0890594	0	0	1.20654	1.11218	1.6939	1.80862	1.18319	1.37711			Gfod1	Gfod1	Gfod1	chr13:43195518-43304172	KSR	2i	OK	2.00506	0.704406	-1.50916	5.74989	8.93007e-09	2.26052e-07	yes			6330503K22Rik	6330503K22Rik	6330503K22Rik	chr7:118712610-118737018	KSR	ETP	OK	12.8175	16.6639	0.378612	-3.42412
											Actg1	685.237	681.287	675.529	622.502	678.182	669.951	910.037	885.318	829.331			Lhfpl2	Lhfpl2	Lhfpl2	chr13:94057795-94195409	KSR	2i	OK	2.12348	0.501673	-2.08161	5.7443	9.2302e-09	2.33155e-07	yes			Scml2	Scml2	Scml2	chrX:161162771-161258213	KSR	ETP	OK	24.3512	30.614	0.330196	-3.42301
											Actg2	0.0828099	0.115072	0	0.188563	0.068383	0.317016	0.270007	0.387007	0.0707071			Cnga3	Cnga3	Cnga3	chr1:37219260-37263384	KSR	2i	OK	4.73145	1.95665	-1.2739	5.74233	9.33845e-09	2.35392e-07	yes			Slain2	Slain2	Slain2	chr5:72914316-72978828	KSR	ETP	OK	15.0042	18.6994	0.317625	-3.42039
											Actl6a	87.3511	92.5673	83.4812	85.4145	87.8456	90.8191	86.3933	78.5833	86.4774			Gpr124	Gpr124	Gpr124	chr8:27085840-27123436	KSR	2i	OK	2.47771	0.878278	-1.49626	5.74013	9.46038e-09	2.37963e-07	yes			4930452B06Rik	4930452B06Rik	4930452B06Rik	chr14:8431171-8666290	KSR	ETP	OK	5.56525	8.49715	0.610533	-3.4134
											Actl6b	0	0	0	0	0	0	0.0620925	0	0			Patl2	Patl2	Patl2	chr2:122120107-122186189	KSR	2i	OK	1.15516	4.16166	1.84906	-5.73704	9.63452e-09	2.41834e-07	yes			Dpp7	Dpp7	Dpp7	chr2:25352289-25356332	KSR	ETP	OK	14.3552	20.5284	0.516053	-3.40999
											Actl7a	0	0	0	0	0	0	0	0	0			1600029D21Rik	1600029D21Rik	1600029D21Rik	chr9:50488798-50505639	KSR	2i	OK	8.60957	3.41946	-1.33217	5.73597	9.69562e-09	2.42858e-07	yes			Uqcrb	Uqcrb	Uqcrb	chr13:66900620-66905350	KSR	ETP	OK	187.568	236.888	0.33679	-3.40774
											Actl7b	0.211536	0.208219	0.0835957	0	0.178625	0.0939033	0.162994	0.220015	0.753832			Enc1	Enc1	Enc1	chr13:97241104-97253040	KSR	2i	OK	44.8861	33.4778	-0.423067	5.71444	1.10067e-08	2.75121e-07	yes			Rcor2	Rcor2	Rcor2	chr19:7269763-7275225	KSR	ETP	OK	63.6886	79.9785	0.328577	-3.40687
											Actl9	0	0	0	0	0	0	0	0	0			Entpd6	Entpd6	Entpd6	chr2:150749080-150771674	KSR	2i	OK	17.1026	10.2263	-0.741938	5.70994	1.13015e-08	2.81901e-07	yes			Nefl	Nefl	Nefl	chr14:68083883-68087737	KSR	ETP	OK	7.58925	11.6564	0.619088	-3.40235
											Actn1	68.8185	69.3439	67.788	49.1727	57.5806	56.7208	66.2194	70.4864	68.9262			Basp1	Basp1	Basp1	chr15:25363276-25413764	KSR	2i	OK	89.1647	64.8293	-0.459827	5.70583	1.15777e-08	2.88189e-07	yes			Zfp187	Zfp187	Zfp187	chr13:21442174-21453727	KSR	ETP	OK	8.80649	12.0593	0.453514	-3.39143
											Actn2	1.83245	1.63127	1.71151	2.19317	2.59613	1.8297	3.1801	2.98381	3.08231			Sfi1	Sfi1	Sfi1	chr11:3124020-3193463	KSR	2i	OK	4.63444	2.05886	-1.17055	5.69884	1.20626e-08	2.99634e-07	yes			Nip7	Nip7	Nip7	chr8:107056876-107060928	KSR	ETP	OK	68.5213	83.0088	0.276711	-3.37556
											Actn3	2.01999	2.50232	2.21424	4.3641	5.99672	5.55712	2.80436	3.38857	3.29904			Klb	Klb	Klb	chr5:65348410-65384003	KSR	2i	OK	3.68269	1.24893	-1.56006	5.69492	1.23433e-08	3.0597e-07	yes			Slc7a7	Slc7a7	Slc7a7	chr14:54360840-54417702	KSR	ETP	OK	39.4564	47.847	0.278168	-3.37408
											Actn4	128.521	132.315	133.86	135.031	159.532	148.476	187.046	191.36	179.664			Tlk2	Tlk2	Tlk2	chr11:105181529-105283956	KSR	2i	OK	28.251	22.4918	-0.328902	5.68914	1.27678e-08	3.15838e-07	yes			Gm1631	Gm1631	Gm1631	chr2:71719416-71730966	KSR	ETP	OK	6.90297	13.4061	0.957604	-3.37371
											Actr10	16.3371	18.7051	17.2606	20.9935	16.8609	20.7111	19.3658	17.281	18.7737			Usp19	Usp19	Usp19	chr9:108490675-108502337	KSR	2i	OK	39.7353	32.8553	-0.274295	5.68815	1.28426e-08	3.17032e-07	yes			Gm4636	Gm4636	Gm4636	chr7:27984470-28014115	KSR	ETP	OK	8.86086	11.5168	0.378223	-3.37038
											Actr1a	28.877	30.1868	30.9272	26.6557	28.2642	29.0682	29.7574	28.3224	30.2576			Hs3st1	Hs3st1	Hs3st1	chr5:39613934-39644631	KSR	2i	OK	5.23515	1.06211	-2.30129	5.68334	1.32092e-08	3.25409e-07	yes			Efnb1	Efnb1	Efnb1	chrX:99136129-99148991	KSR	ETP	OK	2.13917	3.77849	0.820758	-3.36595
											Actr1b	30.4244	32.0085	31.747	31.5714	36.5823	32.5081	37.3695	33.412	33.2416			Vim	Vim	Vim	chr2:13574310-13582826	KSR	2i	OK	168.377	219.295	0.381171	-5.68036	1.34409e-08	3.30435e-07	yes			Rapgef3	Rapgef3	Rapgef3	chr15:97744769-97767666	KSR	ETP	OK	6.89565	9.71473	0.494487	-3.36234
											Actr2	103.33	118.802	110.812	104.542	97.9933	112.147	89.2553	86.5349	90.246			Mcam	Mcam	Mcam	chr9:44134657-44142726	KSR	2i	OK	19.8221	12.8344	-0.62709	5.66981	1.42959e-08	3.50016e-07	yes			Hnrnpr	Hnrnpr	Hnrnpr	chr4:136310975-136340678	KSR	ETP	OK	49.7821	61.8782	0.313804	-3.35544
											Actr3	73.5578	83.0474	75.5849	90.8998	85.9954	94.7779	90.8029	87.4991	94.8639			Prrc2a	Prrc2a	Prrc2a	chr17:35149085-35164877	KSR	2i	OK	69.1014	63.5745	-0.120268	5.67	1.42798e-08	3.50016e-07	yes			Eif4e2	Eif4e2	Eif4e2	chr1:87213913-87240488	KSR	ETP	OK	88.3761	100.623	0.18724	-3.35225
											Actr3b	4.68328	4.84266	5.07618	4.31702	4.14056	3.93685	5.33725	6.07821	4.53265			Igfbp4	Igfbp4	Igfbp4	chr11:99041259-99052643	KSR	2i	OK	6.24333	2.1493	-1.53845	5.65807	1.53086e-08	3.74044e-07	yes			Stac2	Stac2	Stac2	chr11:98036623-98053462	KSR	ETP	OK	4.32053	6.72287	0.637869	-3.34762
											Actr5	6.34368	5.99674	5.7973	4.50901	6.04442	4.82473	6.10405	6.19303	5.75064			Fat1	Fat1	Fat1	chr8:44950207-45052257	KSR	2i	OK	13.988	10.3903	-0.428953	5.65704	1.54003e-08	3.75515e-07	yes			Mgat4c	Mgat4c	Mgat4c	chr10:101681486-102391468	KSR	ETP	OK	1.0392	2.11388	1.02441	-3.34469
											Actr6	16.5488	13.7573	14.6555	19.0249	18.7093	17.4083	16.9017	14.5877	14.5294			Lrrk1	Lrrk1	Lrrk1	chr7:66258746-66388341	KSR	2i	OK	1.10273	0.126771	-3.12079	5.65594	1.54992e-08	3.77159e-07	yes			Calr	Calr	Calr	chr8:84842087-84846931	KSR	ETP	OK	367.699	442.71	0.267836	-3.34318
											Actr8	16.5928	19.0143	18.1096	14.0332	17.0531	19.1675	17.7367	16.3993	17.1519			Nudt4	Nudt4	Nudt4	chr10:95547006-95564167	KSR	2i	OK	77.3498	58.4499	-0.404198	5.65257	1.58064e-08	3.83852e-07	yes			Oaz1	Oaz1	Oaz1	chr10:80826655-80829290	KSR	ETP	OK	164.552	208.519	0.341635	-3.34032
											Actrt1	0	0	0	0	0	0	0	0	0			Rpp25	Rpp25	Rpp25	chr9:57504101-57505447	KSR	2i	OK	49.7171	71.7313	0.528861	-5.65095	1.59559e-08	3.86697e-07	yes			Capn11	Capn11	Capn11	chr17:45630203-45659309	KSR	ETP	OK	0.433319	1.50125	1.79266	-3.33989
											Actrt2	0	0	0	0	0	0	0	0	0			Ly6k	Ly6k	Ly6k	chr15:74796873-74799968	KSR	2i	OK	19.3181	7.56224	-1.35307	5.64554	1.64664e-08	3.98261e-07	yes			Insig1	Insig1	Insig1	chr5:28071411-28078662	KSR	ETP	OK	41.0343	51.4875	0.32739	-3.33087
											Acvr1	3.20376	3.22056	2.6761	2.45845	2.33504	2.49154	2.4163	2.87395	2.40368			Hk1	Hk1	Hk1	chr10:62268854-62379908	KSR	2i	OK	15.5513	21.7895	0.486597	-5.64354	1.66587e-08	4.02098e-07	yes			Cphx	Cphx	Cphx	chr14:26221907-26235735	KSR	ETP	OK	3.23544	5.8468	0.853685	-3.31941
											Acvr1b	9.8167	10.8672	10.4038	11.5247	12.4058	12.3875	11.3877	11.0874	11.695			Sh3tc2	Sh3tc2	Sh3tc2	chr18:61953074-62015719	KSR	2i	OK	2.76534	0.939742	-1.55712	5.63469	1.75368e-08	4.2244e-07	yes			St8sia5	St8sia5	St8sia5	chr18:77185846-77255450	KSR	ETP	OK	0.722637	2.19562	1.60329	-3.31737
											Acvr1c	0	0	0	0	0	0	0	0	0			Fam134b	Fam134b	Fam134b	chr15:25843263-25973687	KSR	2i	OK	7.98217	3.58476	-1.1549	5.62649	1.83909e-08	4.42121e-07	yes			Immp1l	Immp1l	Immp1l	chr2:105904637-105965558	KSR	ETP	OK	28.598	39.6654	0.471965	-3.31638
											Acvr2a	1.88458	1.81669	1.60017	3.00892	2.48664	3.17205	2.4818	2.78503	2.58063			Lonp2	Lonp2	Lonp2	chr8:86624042-86716638	KSR	2i	OK	25.9742	17.3088	-0.585568	5.62528	1.85211e-08	4.44357e-07	yes			Myo1g	Myo1g	Myo1g	chr11:6506547-6520958	KSR	ETP	OK	3.29025	5.28597	0.683972	-3.31267
											Acvr2b	6.11143	4.61462	5.69529	4.21019	4.0593	4.49381	6.02008	5.26762	6.04767			Nupr1	Nupr1	Nupr1	chr7:126623245-126625470	KSR	2i	OK	24.816	45.3413	0.869556	-5.62277	1.87919e-08	4.49627e-07	yes			Ccbl2	Ccbl2	Ccbl2	chr3:142701079-142744910	KSR	ETP	OK	12.4941	17.3683	0.475202	-3.31282
											Acvrl1	0.537019	0.758356	0.549135	0.684385	0.848933	0.62524	0.653713	0.929255	0.728652			Smc1b	Smc1b	Smc1b	chr15:85064688-85131957	KSR	2i	OK	8.01358	4.5301	-0.822906	5.62255	1.8816e-08	4.49627e-07	yes			Irf5	Irf5	Irf5	chr6:29526624-29537320	KSR	ETP	OK	2.97456	5.21617	0.810312	-3.31062
											Acy1	20.3873	17.8441	19.2548	16.695	17.8637	18.1634	17.1106	18.2301	18.4467			Lamc2	Lamc2	Lamc2	chr1:153122755-153186447	KSR	2i	OK	6.75901	3.89409	-0.795526	5.61094	2.01226e-08	4.79891e-07	yes			Cetn3	Cetn3	Cetn3	chr13:81783291-81797157	KSR	ETP	OK	75.9074	96.4146	0.345011	-3.3108
											Acy3	0.709903	1.01278	1.41852	1.16818	0.902005	0.776238	1.99251	2.17944	1.8924			Coch	Coch	Coch	chr12:51593340-51605773	KSR	2i	OK	3.95118	1.09586	-1.85022	5.60509	2.08143e-08	4.95398e-07	yes			Dhodh	Dhodh	Dhodh	chr8:109593247-109608673	KSR	ETP	OK	19.8382	26.3186	0.407805	-3.30894
											Acyp1	6.92875	6.98393	6.16321	6.57037	6.34988	8.45783	4.8266	5.02619	5.97886			Gspt1	Gspt1	Gspt1	chr16:11203382-11254325	KSR	2i	OK	57.142	51.5392	-0.148882	5.60271	2.11029e-08	5.01268e-07	yes			Atp2b1	Atp2b1	Atp2b1	chr10:98915151-99026143	KSR	ETP	OK	12.5872	15.9195	0.338835	-3.30801
											Acyp2	3.42659	3.57304	3.7968	2.31757	2.70173	2.78091	3.01181	3.54975	2.11628			Sat1	Sat1	Sat1	chrX:155213138-155216409	KSR	2i	OK	57.5411	82.5201	0.520154	-5.60133	2.12715e-08	5.0427e-07	yes			Nfib	Nfib	Nfib	chr4:82290172-82505308	KSR	ETP	OK	1.51466	2.26991	0.583636	-3.30755
											Ada	3.62492	3.75706	3.64588	6.03877	6.33686	5.1428	8.89767	8.23166	7.86285			Xlr5a	Xlr5a	Xlr5a	chrX:73107634-73129260	KSR	2i	OK	12.0757	5.86424	-1.04209	5.59911	2.15455e-08	5.09754e-07	yes			Abcc1	Abcc1	Abcc1	chr16:14361557-14474878	KSR	ETP	OK	6.39263	8.62614	0.432306	-3.30573
											Adad1	0.0573094	0.0426619	0.143924	0.196058	0.284311	0.502899	0.448894	0.340195	0.325985			Dram1	Dram1	Dram1	chr10:88322803-88357075	KSR	2i	OK	2.778	0.409622	-2.76168	5.59684	2.18297e-08	5.15457e-07	yes			Fam195a	Fam195a	Fam195a	chr17:25863697-25868738	KSR	ETP	OK	14.4116	22.8446	0.664621	-3.3022
											Adad2	1.18016	1.11051	1.61996	1.16226	1.16073	1.16166	2.14388	1.69599	2.01166			Kdm2b	Kdm2b	Kdm2b	chr5:122870674-122989092	KSR	2i	OK	40.5821	30.8553	-0.395326	5.59347	2.2257e-08	5.2451e-07	yes			Tor1aip2	Tor1aip2	Tor1aip2	chr1:156004598-156068859	KSR	ETP	OK	60.7316	67.398	0.150257	-3.30197
											Adal	7.99245	9.66034	8.03859	8.80893	7.9284	6.54222	7.80322	7.34644	6.43969			Gnpda1	Gnpda1	Gnpda1	chr18:38327536-38338993	KSR	2i	OK	65.3314	87.5393	0.422154	-5.59171	2.24839e-08	5.28814e-07	yes			Tsx	Tsx	Tsx	chrX:103414466-103424583	KSR	ETP	OK	5.83654	11.0766	0.924334	-3.29745
											Adam10	7.80684	9.3361	9.20164	10.0501	9.98288	9.07212	9.63936	9.57939	9.26498			Dlg5	Dlg5	Dlg5	chr14:24133952-24245920	KSR	2i	OK	8.26903	11.1326	0.429003	-5.58733	2.30586e-08	5.41265e-07	yes			Upf3b	Upf3b	Upf3b	chrX:37091833-37110322	KSR	ETP	OK	18.5832	24.7289	0.412205	-3.29331
											Adam11	0.515061	0.452533	0.45154	0.796591	0.611215	0.780108	0.591732	0.469496	0.309483			Bin1	Bin1	Bin1	chr18:32359056-32435740	KSR	2i	OK	6.17458	2.1986	-1.48975	5.5867	2.31428e-08	5.42178e-07	yes			Vma21	Vma21	Vma21	chrX:71816778-71824706	KSR	ETP	OK	6.18834	8.661	0.484979	-3.29253
											Adam12	0	0.0106915	0	0.0721466	0.0252643	0.0445826	0.0474476	0.0775173	0.0125482			Adamts9	Adamts9	Adamts9	chr6:92772698-92901441	KSR	2i	OK	2.49792	1.00793	-1.30933	5.57291	2.50515e-08	5.85345e-07	yes			Slc25a44	Slc25a44	Slc25a44	chr3:88410495-88425139	KSR	ETP	OK	6.61284	9.00257	0.445067	-3.28917
											Adam15	12.364	10.7684	11.2776	14.4986	16.6906	14.7207	16.6661	15.7855	18.042			Arhgap29	Arhgap29	Arhgap29	chr3:121953325-122016153	KSR	2i	OK	8.01055	4.86862	-0.718389	5.57269	2.50834e-08	5.85345e-07	yes			Ppib	Ppib	Ppib	chr9:66060168-66069731	KSR	ETP	OK	94.3479	118.98	0.33465	-3.28141
											Adam17	11.2598	11.1543	11.7494	11.7727	12.4964	12.8979	12.8776	12.6047	12.7503			Ssr4	Ssr4	Ssr4	chrX:73787027-73790828	KSR	2i	OK	90.1138	62.9256	-0.518099	5.56449	2.62916e-08	6.12344e-07	yes			Snrpe	Snrpe	Snrpe	chr1:133603870-133610280	KSR	ETP	OK	322.159	394.762	0.29321	-3.28149
											Adam18	0	0	0	0	0	0	0	0	0.0369264			2410004A20Rik	2410004A20Rik	2410004A20Rik	chr9:73102397-73104443	KSR	2i	OK	37.4578	24.4655	-0.614514	5.56168	2.67194e-08	6.21095e-07	yes			Mesdc1	Mesdc1	Mesdc1	chr7:83880494-83884341	KSR	ETP	OK	8.44817	11.5977	0.45713	-3.26998
											Adam19	5.91113	6.80483	6.35536	3.6351	4.31079	4.05946	4.54658	5.03354	4.12959			Mbnl2	Mbnl2	Mbnl2	chr14:120275668-120431698	KSR	2i	OK	10.6637	6.95239	-0.617126	5.56062	2.68822e-08	6.23666e-07	yes			Nudcd2	Nudcd2	Nudcd2	chr11:40733641-40740046	KSR	ETP	OK	73.1106	90.8581	0.313535	-3.27015
											Adam1a	0.277708	0.276486	0.192872	0.328564	0.382367	0.377312	0.195732	0.326577	0.232597			Krtap17-1	Krtap17-1	Krtap17-1	chr11:99993233-99993994	KSR	2i	OK	4.3351	0	-1.79769e+308	-1.79769e+308	2.72142e-08	6.30146e-07	yes			Tbc1d13	Tbc1d13	Tbc1d13	chr2:30133870-30152013	KSR	ETP	OK	22.1089	28.1803	0.350056	-3.26374
											Adam1b	0.0089835	0.00133544	0.00234235	0.0485849	0.0577575	0.0830603	0.002421	0.00482227	0.0281694			Hnrnpd	Hnrnpd	Hnrnpd	chr5:99955935-99978938	KSR	2i	OK	63.1935	74.9286	0.245741	-5.55592	2.76155e-08	6.38201e-07	yes			Fgfr4	Fgfr4	Fgfr4	chr13:55152817-55168759	KSR	ETP	OK	4.03723	6.29242	0.64025	-3.26223
											Adam2	0	0.032786	0	0.103402	0.0377987	0	0.108921	0.0681897	0.0737412			Ece1	Ece1	Ece1	chr4:137862236-137965229	KSR	2i	OK	8.87631	5.39122	-0.719348	5.5488	2.87636e-08	6.63452e-07	yes			Eif2s2	Eif2s2	Eif2s2	chr2:154871409-154892906	KSR	ETP	OK	419.795	503.138	0.261268	-3.26
											Adam21	0.119948	0.0705927	0	0.0778433	0	0.0644305	0.0254032	0.0233557	0.0524547			Cul5	Cul5	Cul5	chr9:53614581-53667507	KSR	2i	OK	24.9654	18.3352	-0.445319	5.54405	2.95552e-08	6.79088e-07	yes			Ccdc132	Ccdc132	Ccdc132	chr6:3498392-3603531	KSR	ETP	OK	24.3305	30.409	0.321732	-3.2555
											Adam22	0.551692	0.750164	0.759579	0.441986	0.456382	0.640505	0.790278	0.571144	0.580729			Slc25a31	Slc25a31	Slc25a31	chr3:40708870-40726094	KSR	2i	OK	8.56955	3.96849	-1.11063	5.54408	2.95504e-08	6.79088e-07	yes			Trim44	Trim44	Trim44	chr2:102300118-102400900	KSR	ETP	OK	19.0436	23.7389	0.317947	-3.25314
											Adam23	20.7046	22.1643	19.569	23.6782	25.0447	25.0212	19.0021	18.6068	18.2202			Hap1	Hap1	Hap1	chr11:100347326-100356141	KSR	2i	OK	28.0406	36.736	0.389678	-5.54171	2.99528e-08	6.86901e-07	yes			Nfxl1	Nfxl1	Nfxl1	chr5:72513303-72559645	KSR	ETP	OK	14.842	19.2814	0.377518	-3.25291
											Adam24	0	0	0	0	0	0	0	0.0536572	0			Spock1	Spock1	Spock1	chr13:57421194-57908332	KSR	2i	OK	2.08931	0.510787	-2.03224	5.53848	3.051e-08	6.9834e-07	yes			Pdcd10	Pdcd10	Pdcd10	chr3:75516489-75556799	KSR	ETP	OK	41.1233	52.1136	0.341705	-3.24864
											Adam25	0.0366336	0	0.062604	0	0.0318367	0.0387577	0.123619	0.110472	0.0156685			Grk6	Grk6	Grk6	chr13:55445333-55460927	KSR	2i	OK	42.5856	33.2543	-0.356825	5.53225	3.1614e-08	7.22226e-07	yes			Rpf1	Rpf1	Rpf1	chr3:146506345-146521423	KSR	ETP	OK	47.7353	61.5436	0.366552	-3.24774
											Adam26a	0	0	0	0	0	0	0	0	0			Lad1	Lad1	Lad1	chr1:135818597-135833341	KSR	2i	OK	2.86452	0.596128	-2.2646	5.53026	3.19763e-08	7.29108e-07	yes			Nkx6-3	Nkx6-3	Nkx6-3	chr8:23153270-23158948	KSR	ETP	OK	1.48539	3.1459	1.08263	-3.24377
											Adam26b	0	0	0	0	0	0	0	0	0			Slc43a2	Slc43a2	Slc43a2	chr11:75531693-75577572	KSR	2i	OK	3.3778	1.77522	-0.928084	5.5291	3.21878e-08	7.32534e-07	yes			Mavs	Mavs	Mavs	chr2:131127411-131604824	KSR	ETP	OK	6.61326	9.33121	0.496704	-3.23892
											Adam28	0.102468	0.0540807	0	0.0417813	0	0.108449	0	0.0555028	0.14151			Mest	Mest	Mest	chr6:30733505-30748466	KSR	2i	OK	39.9928	30.7008	-0.381461	5.52071	3.37641e-08	7.66945e-07	yes			Ube2l6	Ube2l6	Ube2l6	chr2:84798827-84810003	KSR	ETP	OK	32.0504	42.1866	0.396443	-3.23758
											Adam29	0	0	0	0	0	0	0	0	0			Crip2	Crip2	Crip2	chr12:113140235-113145506	KSR	2i	OK	32.8841	20.2689	-0.69812	5.5048	3.69581e-08	8.37903e-07	yes			4933421E11Rik	4933421E11Rik	4933421E11Rik	chr3:106684986-106736576	KSR	ETP	OK	5.76066	9.04703	0.65121	-3.23441
											Adam3	0	0	0	0	0	0.0419696	0.0345582	0.0324196	0			Vnn1	Vnn1	Vnn1	chr10:23894687-23905343	KSR	2i	OK	3.28519	0.546501	-2.58768	5.50342	3.72495e-08	8.4291e-07	yes			Fam159b	Fam159b	Fam159b	chr13:104845282-104863893	KSR	ETP	OK	3.36765	6.38749	0.923506	-3.2276
											Adam30	0	0	0	0.0472915	0.0324086	0.0391659	0	0	0			Ptpn13	Ptpn13	Ptpn13	chr5:103425191-103598361	KSR	2i	OK	3.49463	1.91909	-0.864716	5.49929	3.8132e-08	8.6125e-07	yes			Stoml1	Stoml1	Stoml1	chr9:58253163-58262524	KSR	ETP	OK	9.69662	13.4642	0.473572	-3.22643
											Adam32	0.0393011	0.0935003	0.0337092	0.0976912	0.140907	0	0.102876	0.0314621	0.141491			Oxct1	Oxct1	Oxct1	chr15:4020110-4155344	KSR	2i	OK	16.9738	24.4209	0.524808	-5.49368	3.93641e-08	8.87401e-07	yes			Armc1	Armc1	Armc1	chr3:19132143-19163065	KSR	ETP	OK	30.9899	38.8813	0.327279	-3.22386
											Adam33	0	0	0	0.350128	0.0389767	0.0439962	0.0378082	0.155742	0			Man1a2	Man1a2	Man1a2	chr3:100562204-100685473	KSR	2i	OK	9.23058	6.29553	-0.552093	5.48754	4.07578e-08	9.17089e-07	yes			Magohb	Magohb	Magohb	chr6:131284388-131293244	KSR	ETP	OK	30.4148	42.5319	0.483773	-3.21599
											Adam34	0	0	0	0	0	0	0	0	0			Xlr5b	Xlr5b	Xlr5b	chrX:73137231-73158399	KSR	2i	OK	16.8013	8.11269	-1.05032	5.48256	4.19216e-08	9.41503e-07	yes			Noa1	Noa1	Noa1	chr5:77294168-77310086	KSR	ETP	OK	17.7043	23.6819	0.419684	-3.21212
											Adam39	0	0	0	0	0	0	0.018701	0.00345921	0.0192986			Tuba4a	Tuba4a	Tuba4a	chr1:75210828-75219253	KSR	2i	OK	58.7812	79.3474	0.432828	-5.47953	4.26464e-08	9.55983e-07	yes			Orc3	Orc3	Orc3	chr4:34550614-34614942	KSR	ETP	OK	14.8878	16.983	0.189959	-3.20319
											Adam4	0.21561	0.155452	0.150259	0.0491374	0.101438	0.124332	0.136671	0.105446	0.0687498			Tex11	Tex11	Tex11	chrX:100838647-101059639	KSR	2i	OK	6.49726	3.15307	-1.04308	5.47812	4.29874e-08	9.61824e-07	yes			Ttll6	Ttll6	Ttll6	chr11:96133785-96165452	KSR	ETP	OK	0.638995	1.62631	1.34773	-3.196
											Adam5	0	0	0	0	0	0	0	0	0			Exoc6b	Exoc6b	Exoc6b	chr6:84618485-85069513	KSR	2i	OK	12.5451	17.7424	0.500078	-5.47171	4.45718e-08	9.93553e-07	yes			Fabp5	Fabp5	Fabp5	chr3:10012605-10016610	KSR	ETP	OK	36.7899	49.3757	0.424489	-3.19622
											Adam6a	0	0	0	0	0	0	0	0	0			Soat1	Soat1	Soat1	chr1:156428107-156474328	KSR	2i	OK	4.91092	2.55044	-0.94525	5.47187	4.45315e-08	9.93553e-07	yes			E2f8	E2f8	E2f8	chr7:48866428-48881041	KSR	ETP	OK	12.1964	16.0796	0.398775	-3.1937
											Adam6b	0	0	0	0	0	0	0	0	0			Nomo1	Nomo1	Nomo1	chr7:46033695-46084212	KSR	2i	OK	39.9352	29.5936	-0.432374	5.47129	4.4676e-08	9.94019e-07	yes			Rhof	Rhof	Rhof	chr5:123118179-123132629	KSR	ETP	OK	2.86158	5.02465	0.812211	-3.1928
											Adam7	0	0	0	0	0	0	0	0	0			5730419I09Rik	5730419I09Rik	5730419I09Rik	chr6:143010919-143100107	KSR	2i	OK	28.915	23.1126	-0.323142	5.46585	4.60682e-08	1.02309e-06	yes			Rad1	Rad1	Rad1	chr15:10486033-10493691	KSR	ETP	OK	28.1752	37.0564	0.3953	-3.19302
											Adam8	0.126135	0.336242	0.381074	0.732614	0.666327	0.397975	0.894139	1.07301	0.987259			Ptma	Ptma	Ptma	chr1:86526735-86530698	KSR	2i	OK	2102.01	2702.26	0.362401	-5.46539	4.61893e-08	1.02388e-06	yes			Casp8ap2	Casp8ap2	Casp8ap2	chr4:32615472-32653265	KSR	ETP	OK	11.91	14.9639	0.329313	-3.19207
											Adam9	8.28905	10.8811	10.1936	7.83572	8.48262	8.22565	12.1495	11.6552	11.1591			Ctsd	Ctsd	Ctsd	chr7:142375915-142387870	KSR	2i	OK	174.326	134.782	-0.371166	5.46331	4.67326e-08	1.034e-06	yes			Tfcp2l1	Tfcp2l1	Tfcp2l1	chr1:118627944-118685168	KSR	ETP	OK	38.8428	46.619	0.263272	-3.19005
											Adamdec1	0	0	0	0	0.0317559	0	0.0305189	0	0			Cds2	Cds2	Cds2	chr2:132263256-132312041	KSR	2i	OK	15.8256	21.2291	0.423783	-5.46257	4.69279e-08	1.0364e-06	yes			Cox6c	Cox6c	Cox6c	chr15:35931975-35938246	KSR	ETP	OK	328.459	400.628	0.286549	-3.18528
											Adamts1	0.183823	0.063973	0.070317	0.530619	0.313416	0.374633	0.231488	0.34768	0.239925			D8Ertd82e	D8Ertd82e	D8Ertd82e	chr8:36094827-36147787	KSR	2i	OK	1.92463	0.454272	-2.08295	5.46051	4.74766e-08	1.04659e-06	yes			Ublcp1	Ublcp1	Ublcp1	chr11:44454570-44470548	KSR	ETP	OK	27.085	34.811	0.362046	-3.17675
											Adamts10	1.68572	1.92577	1.95266	2.20178	2.93004	2.84034	2.37424	2.66008	2.38428			Hsd17b10	Hsd17b10	Hsd17b10	chrX:152001895-152004442	KSR	2i	OK	43.1636	65.2008	0.595076	-5.4597	4.7695e-08	1.04947e-06	yes			Gm14430	Gm14430	Gm14430	chr2:176619932-176636319	KSR	ETP	OK	17.6305	21.1329	0.261419	-3.17677
											Adamts12	0	0	0	0	0	0	0.0138691	0.0130137	0			Llgl2	Llgl2	Llgl2	chr11:115824057-115855780	KSR	2i	OK	58.3962	43.8328	-0.413865	5.45652	4.85565e-08	1.06646e-06	yes			Yy2	Yy2	Yy2	chrX:157547821-157598715	KSR	ETP	OK	5.05572	7.52662	0.574085	-3.17436
											Adamts13	0	0	0	0	0.0230703	0	0	0	0			Nav2	Nav2	Nav2	chr7:48959072-49610088	KSR	2i	OK	1.2988	0.51082	-1.34629	5.45446	4.91213e-08	1.07688e-06	yes			Midn	Midn	Midn	chr10:79697304-80369637	KSR	ETP	OK	40.0962	49.2548	0.296796	-3.1696
											Adamts14	1.37702	1.61827	1.83786	1.26716	1.93051	1.76445	1.5688	1.99649	1.81063			Tcfl5	Tcfl5	Tcfl5	chr2:180598221-180642691	KSR	2i	OK	33.8094	22.8895	-0.562742	5.45333	4.94357e-08	1.08179e-06	yes			Ddx46	Ddx46	Ddx46	chr13:55635026-55681256	KSR	ETP	OK	35.3529	42.883	0.278579	-3.16681
											Adamts15	0.124544	0.196185	0.208973	0.398629	0.407014	0.192744	0.102509	0.120915	0.150938			Creb3l1	Creb3l1	Creb3l1	chr2:91982327-92024170	KSR	2i	OK	8.21364	3.72239	-1.14179	5.45094	5.01053e-08	1.09444e-06	yes			Eny2	Eny2	Eny2	chr15:44375226-44437685	KSR	ETP	OK	25.1486	32.0718	0.350828	-3.16435
											Adamts16	0	0	0	0.0269238	0	0	0	0	0			Ppfibp1	Ppfibp1	Ppfibp1	chr6:146888493-147032023	KSR	2i	OK	13.1925	9.15714	-0.526746	5.44764	5.10412e-08	1.11285e-06	yes			Nt5e	Nt5e	Nt5e	chr9:88327608-88372089	KSR	ETP	OK	8.0908	11.0261	0.446568	-3.16361
											Adamts17	0.0530058	0.0689613	0.0784917	0.141198	0.164456	0.0762922	0.216477	0.217207	0.144889			Ccdc3	Ccdc3	Ccdc3	chr2:5137775-5230866	KSR	2i	OK	10.213	5.56159	-0.876832	5.43481	5.48542e-08	1.1938e-06	yes			Dars2	Dars2	Dars2	chr1:161040612-161070632	KSR	ETP	OK	14.8979	19.2263	0.367967	-3.16096
											Adamts18	0	0	0	0	0.0216254	0	0	0	0			Myo1f	Myo1f	Myo1f	chr17:33555706-33607764	KSR	2i	OK	11.4158	17.0978	0.582777	-5.43395	5.51214e-08	1.19744e-06	yes			1700029F09Rik	1700029F09Rik	1700029F09Rik	chr1:44086616-44102388	KSR	ETP	OK	30.9449	40.6778	0.394539	-3.15949
											Adamts19	0.0445087	0.0690211	0.0944653	0.055797	0.0793369	0.0236946	0	0.121651	0.0398346			Eda2r	Eda2r	Eda2r	chrX:97333840-97377209	KSR	2i	OK	15.7865	10.5877	-0.576302	5.43331	5.53173e-08	1.19951e-06	yes			Rab3il1	Rab3il1	Rab3il1	chr19:10018227-10035586	KSR	ETP	OK	4.57044	7.14181	0.643955	-3.15905
											Adamts2	0.0390694	0.0270296	0.0646225	0.0460732	0.133534	0.146253	0.0636398	0.116678	0.227494			Ap1m2	Ap1m2	Ap1m2	chr9:21295456-21312333	KSR	2i	OK	6.5285	2.2681	-1.52527	5.42874	5.67538e-08	1.22843e-06	yes			Acad9	Acad9	Acad9	chr3:36065999-36092857	KSR	ETP	OK	23.5287	29.3765	0.320243	-3.15555
											Adamts20	0.139493	0.191408	0	0.198952	0.208479	0.0700194	0.235635	0.156432	0.0309904			Bend5	Bend5	Bend5	chr4:110397790-111657510	KSR	2i	OK	4.50019	0.85326	-2.39893	5.42521	5.78852e-08	1.25066e-06	yes			Srp9	Srp9	Srp9	chr1:182124736-182132415	KSR	ETP	OK	59.0596	74.0727	0.326771	-3.15383
											Adamts3	0.269277	0.26	0.225773	0.433954	0.280642	0.471589	0.497608	0.475572	0.596384			Aes	Aes	Aes	chr10:81559559-81566364	KSR	2i	OK	149.443	195.079	0.384469	-5.42427	5.81928e-08	1.25503e-06	yes			D030056L22Rik	D030056L22Rik	D030056L22Rik	chr19:18713235-18718428	KSR	ETP	OK	48.0282	60.3579	0.32966	-3.15241
											Adamts4	0.333708	0.235325	0.381552	0.403503	0.50113	0.405526	0.470225	0.523504	0.53701			Rgnef	Rgnef	Rgnef	chr13:97898594-98206165	KSR	2i	OK	1.69053	0.539396	-1.64806	5.42289	5.86436e-08	1.26248e-06	yes			Sec24a	Sec24a	Sec24a	chr11:51692262-51756834	KSR	ETP	OK	6.01241	7.94815	0.402675	-3.14604
											Adamts5	0	0	0.0113375	0.0164164	0.0234681	0.029088	0.124259	0.0519058	0.0603092			F2rl1	F2rl1	F2rl1	chr13:95511729-95525240	KSR	2i	OK	39.3117	28.2407	-0.47718	5.42176	5.90147e-08	1.26818e-06	yes			Nhedc1	Nhedc1	Nhedc1	chr3:135348036-135397827	KSR	ETP	OK	11.0703	15.2749	0.464468	-3.13758
											Adamts6	0	0.0353089	0.0193185	0	0	0	0.0191563	0.0180223	0.0195681			Car4	Car4	Car4	chr11:84957753-84966054	KSR	2i	OK	7.60465	0.346809	-4.45467	5.419	5.99326e-08	1.28559e-06	yes			Cdc42ep1	Cdc42ep1	Cdc42ep1	chr15:78842646-78855529	KSR	ETP	OK	3.89681	6.22376	0.675492	-3.13727
											Adamts7	0.681369	0.781572	0.698248	1.22773	1.68443	1.38993	1.95738	2.29981	2.61391			Inpp5d	Inpp5d	Inpp5d	chr1:87620311-87720508	KSR	2i	OK	31.667	38.1511	0.268744	-5.41816	6.02157e-08	1.28935e-06	yes			Ctsf	Ctsf	Ctsf	chr19:4855128-4860912	KSR	ETP	OK	7.35404	10.9595	0.575575	-3.13489
											Adamts8	0.899307	0.917379	0.821583	0.726274	0.89448	0.865557	0.612725	0.713879	0.750287			Nell2	Nell2	Nell2	chr15:95219449-95528706	KSR	2i	OK	4.33005	1.73095	-1.32282	5.41126	6.25834e-08	1.33566e-06	yes			Ppa2	Ppa2	Ppa2	chr3:133310115-133378069	KSR	ETP	OK	43.215	55.8654	0.370424	-3.13101
											Adamts9	0.748201	0.891416	0.845358	5.53482	6.27011	5.94989	1.8394	2.4288	1.94334			Pmp22	Pmp22	Pmp22	chr11:63131509-63159546	KSR	2i	OK	4.27997	0.347388	-3.62298	5.4112	6.26022e-08	1.33566e-06	yes			Men1	Men1	Men1	chr19:6334978-6340894	KSR	ETP	OK	28.039	33.4189	0.253231	-3.13025
											Adamtsl1	0.0155743	0.0454008	0.0648164	0.0763758	0.0266978	0.0764693	0.152933	0.188724	0.172782			Pla2g7	Pla2g7	Pla2g7	chr17:43568450-43612201	KSR	2i	OK	5.3734	1.6859	-1.67232	5.40959	6.31704e-08	1.34538e-06	yes			Spg7	Spg7	Spg7	chr8:123065507-123097751	KSR	ETP	OK	26.6641	34.0178	0.351392	-3.12936
											Adamtsl2	0	0	0	0.140673	0	0	0	0.0291022	0			Tdpoz4	Tdpoz4	Tdpoz4	chr3:93796397-93797510	KSR	2i	OK	6.67971	1.32795	-2.33059	5.40349	6.53576e-08	1.38949e-06	yes			Cebpz	Cebpz	Cebpz	chr17:78916498-78937070	KSR	ETP	OK	45.6448	55.4004	0.279446	-3.12827
											Adamtsl3	0.0292849	0	0.0122404	0	0.0379816	0.0446344	0.0242402	0.0222176	0			Parva	Parva	Parva	chr7:112427705-112591688	KSR	2i	OK	3.23367	1.33263	-1.27889	5.40202	6.5894e-08	1.3984e-06	yes			Caskin2	Caskin2	Caskin2	chr11:115799351-115813592	KSR	ETP	OK	6.04568	8.36333	0.468173	-3.12663
											Adamtsl4	0.791849	0.6695	0.66343	0.572281	0.824232	0.87683	0.732046	1.1374	0.706805			Morc1	Morc1	Morc1	chr16:48431236-48630905	KSR	2i	OK	42.9084	57.3445	0.418395	-5.38995	7.04771e-08	1.49302e-06	yes			Slc6a15	Slc6a15	Slc6a15	chr10:103367807-103419379	KSR	ETP	OK	2.60382	4.05923	0.640576	-3.12435
											Adamtsl5	1.33031	1.30309	0.666817	0.997307	1.09187	1.71124	1.38812	0.520135	1.01589			Mtss1	Mtss1	Mtss1	chr15:58941233-59082026	KSR	2i	OK	21.1462	27.0708	0.356337	-5.38882	7.09222e-08	1.49979e-06	yes			Usp19	Usp19	Usp19	chr9:108490675-108502337	KSR	ETP	OK	40.2097	43.732	0.121147	-3.12178
											Adap1	11.2328	12.6333	11.4938	4.27613	6.47168	4.72242	9.67512	9.97778	10.5953			Esrp1	Esrp1	Esrp1	chr4:11332037-11386783	KSR	2i	OK	2.23657	0.560974	-1.99528	5.3858	7.21234e-08	1.52249e-06	yes			Dusp6	Dusp6	Dusp6	chr10:99263230-99267489	KSR	ETP	OK	36.6974	45.5251	0.310985	-3.12086
											Adap2	1.22442	1.6358	1.39789	0	0.375216	0.365601	0.52772	0.400977	0.868959			Tcea1	Tcea1	Tcea1	chr1:4857693-4897909	KSR	2i	OK	122.744	110.555	-0.150882	5.37506	7.65577e-08	1.61325e-06	yes			Tmem47	Tmem47	Tmem47	chrX:81070643-81097875	KSR	ETP	OK	2.8024	4.32239	0.625164	-3.11428
											Adar	9.4197	11.407	9.76534	8.91289	9.9016	9.95724	8.73134	9.95332	9.0565			Ptprf	Ptprf	Ptprf	chr4:118208212-118291397	KSR	2i	OK	27.825	21.0256	-0.404236	5.37217	7.77965e-08	1.63647e-06	yes			Egr4	Egr4	Egr4	chr6:85511121-85513542	KSR	ETP	OK	0.56412	1.98934	1.81821	-3.11248
											Adarb1	1.08443	1.48667	1.26163	1.82055	1.59223	1.6606	1.42069	1.3456	1.46799			Msn	Msn	Msn	chrX:96096044-96168553	KSR	2i	OK	34.8384	46.3671	0.412423	-5.36908	7.91391e-08	1.66178e-06	yes			Hmgn3	Hmgn3	Hmgn3	chr9:83109941-83146607	KSR	ETP	OK	5.46972	9.89419	0.855113	-3.11017
											Adarb2	0	0.0138497	0.0153868	0.0223556	0.015772	0	0.0461256	0	0			Slc16a3	Slc16a3	Slc16a3	chr11:120948483-120959000	KSR	2i	OK	5.14836	1.89894	-1.43892	5.36402	8.13882e-08	1.70601e-06	yes			Chst15	Chst15	Chst15	chr7:132236254-132318291	KSR	ETP	OK	1.73062	2.87325	0.731391	-3.10892
											Adat1	4.95301	5.77889	5.5408	7.94314	6.50261	8.40239	5.66494	5.2747	5.71846			Ubxn2a	Ubxn2a	Ubxn2a	chr12:4879031-4907520	KSR	2i	OK	36.6885	50.1255	0.450219	-5.35853	8.39025e-08	1.75563e-06	yes			0610009B22Rik	0610009B22Rik	0610009B22Rik	chr11:51685384-51688634	KSR	ETP	OK	28.9204	40.4011	0.482308	-3.10515
											Adat2	18.2536	16.3872	17.8866	10.2874	9.53934	8.44454	11.261	10.0525	8.1001			Uggt2	Uggt2	Uggt2	chr14:118984984-119099434	KSR	2i	OK	1.21518	0.268004	-2.18084	5.35564	8.52524e-08	1.78076e-06	yes			2810407C02Rik	2810407C02Rik	2810407C02Rik	chr3:58576657-58593546	KSR	ETP	OK	50.5389	61.2217	0.276648	-3.10315
											Adat3	7.59625	4.28023	5.76912	4.99966	5.22357	4.45488	5.80561	5.56212	6.69191			Gm5635	Gm5635	Gm5635	chrX:9063089-9063822	KSR	2i	OK	20.6678	8.8291	-1.22705	5.34499	9.04219e-08	1.88545e-06	yes			2310008H09Rik	2310008H09Rik	2310008H09Rik	chr7:118842217-118995211	KSR	ETP	OK	40.9868	47.8701	0.223966	-3.0992
											Adc	3.63713	3.81976	3.97656	3.67442	3.39244	4.64851	4.93295	7.27893	6.84639			Rhox6	Rhox6	Rhox6	chrX:37827054-37829857	KSR	2i	OK	8.30743	1.22959	-2.75622	5.33893	9.3496e-08	1.94615e-06	yes			1110059E24Rik	1110059E24Rik	1110059E24Rik	chr19:21597312-21652791	KSR	ETP	OK	37.9265	48.5498	0.35626	-3.0942
											Adck1	5.83431	5.26595	5.13736	5.7041	6.51116	5.81702	6.24524	7.01247	6.89144			Adat2	Adat2	Adat2	chr10:13523841-13563376	KSR	2i	OK	11.2118	19.9858	0.833962	-5.33846	9.37403e-08	1.94784e-06	yes			Plcb4	Plcb4	Plcb4	chr2:135741829-136013068	KSR	ETP	OK	7.77083	10.575	0.444518	-3.09278
											Adck2	1.47163	1.16849	1.63518	2.26335	1.7007	1.66258	1.31345	1.70901	1.80578			Tuba1b	Tuba1b	Tuba1b	chr15:98931430-98934390	KSR	2i	OK	863.94	1087.89	0.332531	-5.33404	9.60494e-08	1.99236e-06	yes			Ceacam2	Ceacam2	Ceacam2	chr7:25379526-25566417	KSR	ETP	OK	1.48495	2.61891	0.818556	-3.09023
											Adck3	1.18098	1.26739	1.27572	2.00707	2.28486	2.29782	1.72605	1.89225	1.9401			Rtn4	Rtn4	Rtn4	chr11:29692897-30026033	KSR	2i	OK	79.8504	92.3019	0.209061	-5.32893	9.87921e-08	2.0457e-06	yes			Cisd2	Cisd2	Cisd2	chr3:135406411-135423433	KSR	ETP	OK	9.72388	13.2332	0.444562	-3.08856
											Adck4	4.02309	3.86023	4.52845	3.82546	3.38384	2.83481	4.20816	3.96601	4.70052			Frmpd1	Frmpd1	Frmpd1	chr4:45184905-45285936	KSR	2i	OK	1.6376	0.14517	-3.49577	5.31443	1.06993e-07	2.21168e-06	yes			1110002B05Rik	1110002B05Rik	1110002B05Rik	chr12:54645373-54656572	KSR	ETP	OK	24.4863	32.6135	0.413491	-3.08651
											Adck5	7.71235	6.96706	6.68213	5.97711	6.75172	6.96462	5.25018	6.79486	6.21791			Slc6a8	Slc6a8	Slc6a8	chrX:73673132-73682500	KSR	2i	OK	64.1652	49.4765	-0.375049	5.31348	1.07553e-07	2.21941e-06	yes			Dnajc6	Dnajc6	Dnajc6	chr4:101496647-101642799	KSR	ETP	OK	5.57782	7.23073	0.374439	-3.08652
											Adcy1	0.648742	0.703865	0.736991	1.12589	1.05178	1.25665	0.762049	0.847088	0.660612			Tmed3	Tmed3	Tmed3	chr9:89699202-89705043	KSR	2i	OK	11.4974	5.0123	-1.19776	5.31274	1.07989e-07	2.22458e-06	yes			Rnf219	Rnf219	Rnf219	chr14:104477533-104522666	KSR	ETP	OK	5.21273	7.44371	0.513982	-3.08608
											Adcy10	0.0606748	0.0150239	0.050855	0.0240394	0.0507911	0.117798	0.0335904	0.093292	0.0855822			Serpinb9b	Serpinb9b	Serpinb9b	chr13:33027413-33040558	KSR	2i	OK	5.17363	1.69291	-1.61167	5.31037	1.094e-07	2.24976e-06	yes			Slc52a3	Slc52a3	Slc52a3	chr2:151996510-152009258	KSR	ETP	OK	4.75377	7.05826	0.570241	-3.08253
											Adcy2	0.778978	0.798171	0.440285	1.18892	1.00953	0.929403	1.30855	1.22937	1.32616			Slco2a1	Slco2a1	Slco2a1	chr9:103008488-103087849	KSR	2i	OK	2.81565	0.96186	-1.54957	5.3079	1.10894e-07	2.27656e-06	yes			Gnptab	Gnptab	Gnptab	chr10:88379411-88447329	KSR	ETP	OK	8.74727	11.4049	0.38275	-3.0773
											Adcy3	2.27049	2.03328	2.09253	2.45063	2.9735	2.61978	2.12734	2.81807	2.74422			Sycp2	Sycp2	Sycp2	chr2:178345295-178407658	KSR	2i	OK	1.37369	0.320449	-2.09989	5.30753	1.11123e-07	2.27736e-06	yes			1810035L17Rik	1810035L17Rik	1810035L17Rik	chr12:87428077-87472299	KSR	ETP	OK	134.949	171.983	0.349856	-3.07524
											Adcy4	0.0756451	0	0.0317829	0	0.0646826	0.0733724	0.123617	0.0854473	0.159096			2810474O19Rik	2810474O19Rik	2810474O19Rik	chr6:149309413-149335663	KSR	2i	OK	34.409	26.2498	-0.390476	5.29446	1.19372e-07	2.44221e-06	yes			Mrpl18	Mrpl18	Mrpl18	chr17:12911354-12916091	KSR	ETP	OK	98.4936	122.098	0.309936	-3.07308
											Adcy5	0.172132	0.0807966	0.166801	0.102208	0.220772	0.162787	0.0693705	0.106073	0.119637			Sh3pxd2b	Sh3pxd2b	Sh3pxd2b	chr11:32347810-32428183	KSR	2i	OK	2.45997	1.16689	-1.07597	5.29095	1.21685e-07	2.48529e-06	yes			Flt4	Flt4	Flt4	chr11:49609678-49652739	KSR	ETP	OK	1.35284	2.22467	0.717598	-3.07265
											Adcy6	0.226305	0.532469	0.496163	0.778481	0.862146	0.623061	0.84901	0.739775	0.641004			Etv5	Etv5	Etv5	chr16:22381312-22439570	KSR	2i	OK	74.0594	94.7942	0.356116	-5.29038	1.22065e-07	2.48879e-06	yes			Isy1	Isy1	Isy1	chr6:87818447-87838759	KSR	ETP	OK	39.5897	50.1078	0.33991	-3.06937
											Adcy7	0.240533	0.150682	0.141457	0.74958	0.662802	0.582	0.417953	0.607067	0.483583			Gm4971	Gm4971	Gm4971	chr7:73685491-73686563	KSR	2i	OK	12.51	4.99547	-1.32439	5.28929	1.22793e-07	2.49938e-06	yes			Lepre1	Lepre1	Lepre1	chr4:119232914-119248977	KSR	ETP	OK	18.4317	22.6308	0.296094	-3.0651
											Adcy8	0	0	0	0.0589576	0.0209768	0	0	0.0379516	0			1500009L16Rik	1500009L16Rik	1500009L16Rik	chr10:83722864-83762762	KSR	2i	OK	20.8655	11.2893	-0.886161	5.28074	1.28665e-07	2.61443e-06	yes			Snrpb2	Snrpb2	Snrpb2	chr2:143063068-143072052	KSR	ETP	OK	92.1635	113.104	0.295378	-3.06065
											Adcy9	0.488011	0.459659	0.400346	0.570761	0.411153	0.488968	0.835796	0.464352	0.606839			Igsf9	Igsf9	Igsf9	chr1:172482212-172498877	KSR	2i	OK	5.46345	2.7809	-0.974262	5.27708	1.31256e-07	2.66255e-06	yes			Hbxip	Hbxip	Hbxip	chr3:107278857-107284081	KSR	ETP	OK	46.0437	60.0369	0.382843	-3.0529
											Adcyap1	0.0556797	0.042748	0.0454902	0	0.0467626	0.118217	0	0	0			Fam83h	Fam83h	Fam83h	chr15:76001091-76014336	KSR	2i	OK	5.04017	2.56167	-0.976388	5.27677	1.31482e-07	2.66261e-06	yes			Grik3	Grik3	Grik3	chr4:125490830-125714173	KSR	ETP	OK	5.58969	7.20848	0.366927	-3.04983
											Adcyap1r1	0.110011	0.0697211	0.0790248	0.101661	0.139135	0.148806	0.0777847	0.226468	0.0809033			Igf2bp2	Igf2bp2	Igf2bp2	chr16:22059008-22163299	KSR	2i	OK	21.6457	29.7497	0.458795	-5.2741	1.33407e-07	2.69247e-06	yes			Gprc5b	Gprc5b	Gprc5b	chr7:118842217-118995211	KSR	ETP	OK	4.01938	5.73503	0.51283	-3.04772
											Add1	30.7701	28.4245	29.7575	26.534	26.577	25.2818	29.9372	31.4412	29.7154			Zfhx2	Zfhx2	Zfhx2	chr14:55061658-55092048	KSR	2i	OK	6.3544	9.18118	0.530924	-5.27413	1.33389e-07	2.69247e-06	yes			Slc30a1	Slc30a1	Slc30a1	chr1:191894071-191913247	KSR	ETP	OK	8.00378	10.4516	0.384963	-3.04512
											Add2	0.0359642	0	0	0.0437699	0	0.0701037	0	0	0.126414			Pcna	Pcna	Pcna	chr2:132249285-132253180	KSR	2i	OK	343.423	433.615	0.33643	-5.26243	1.42165e-07	2.8644e-06	yes			Smug1	Smug1	Smug1	chr15:103153289-103163284	KSR	ETP	OK	4.84325	6.9085	0.512397	-3.04239
											Add3	9.14899	9.42287	9.05605	9.81623	9.32862	9.67483	9.60046	9.59009	9.85765			Klhl22	Klhl22	Klhl22	chr16:17759620-17793382	KSR	2i	OK	20.1086	28.8796	0.522236	-5.25364	1.49121e-07	2.99949e-06	yes			Cggbp1	Cggbp1	Cggbp1	chr16:64852084-64859491	KSR	ETP	OK	50.8508	61.1096	0.265129	-3.04236
											Adh1	0.2723	0.255061	0.226706	0.316108	0.0775754	0.178832	0.145283	0.210197	0.232392			Sox4	Sox4	Sox4	chr13:28950729-28953682	KSR	2i	OK	8.97846	4.84282	-0.890621	5.25256	1.49996e-07	3.01201e-06	yes			Cdh2	Cdh2	Cdh2	chr18:16588876-16809049	KSR	ETP	OK	0.833146	1.60995	0.950379	-3.04185
											Adh4	0.631632	0.631217	0.463465	0.914751	1.24619	1.00502	1.08574	1.26008	1.19049			Macf1	Macf1	Macf1	chr4:123349632-123684360	KSR	2i	OK	9.91052	12.7037	0.358221	-5.25154	1.50834e-07	3.02376e-06	yes			Chmp2b	Chmp2b	Chmp2b	chr16:65539132-65562697	KSR	ETP	OK	17.3262	23.1548	0.418355	-3.04079
											Adh5	139.555	144.453	142.114	144.824	138.486	148.379	139.963	134.1	134.095			Kdelr3	Kdelr3	Kdelr3	chr15:79516407-79546741	KSR	2i	OK	43.328	29.175	-0.570568	5.2487	1.53177e-07	3.0656e-06	yes			Mad2l1	Mad2l1	Mad2l1	chr6:66535467-66540991	KSR	ETP	OK	87.3698	105.798	0.276105	-3.04036
											Adh6-ps1	0	0	0.026185	6.02086e-05	0.0293119	0	0	0	2.96914e-05			Aox3	Aox3	Aox3	chr1:58113135-58200452	KSR	2i	OK	0.352643	1.65891	2.23395	-5.23656	1.63601e-07	3.26874e-06	yes			Nufip2	Nufip2	Nufip2	chr11:77686138-77717966	KSR	ETP	OK	20.2157	24.2888	0.264821	-3.04022
											Adh6a	0	0	0	0	0	0	0	0	0			Sohlh2	Sohlh2	Sohlh2	chr3:55182043-55209957	KSR	2i	OK	64.0895	47.9318	-0.419104	5.2349	1.65075e-07	3.29268e-06	yes			Msh6	Msh6	Msh6	chr17:87975049-88065285	KSR	ETP	OK	169.549	200.635	0.242874	-3.03406
											Adh7	0.192134	0.22339	0	0.173136	0.288071	0.149795	0.318549	0.440707	0.286917			Gsta4	Gsta4	Gsta4	chr9:78191965-78209349	KSR	2i	OK	301.913	384.9	0.350353	-5.22968	1.69804e-07	3.38136e-06	yes			Lrrc8c	Lrrc8c	Lrrc8c	chr5:105519470-105608954	KSR	ETP	OK	4.98109	7.39942	0.570952	-3.03248
											Adhfe1	0.545934	0.602502	0.694989	0.765587	0.511778	0.992207	0.532611	0.369131	0.392446			Zfp568	Zfp568	Zfp568	chr7:29983954-30028282	KSR	2i	OK	31.0238	26.7019	-0.216435	5.22216	1.7685e-07	3.51582e-06	yes			B4galt5	B4galt5	B4galt5	chr2:167298444-167349178	KSR	ETP	OK	13.2005	16.835	0.350872	-3.03094
											Adi1	42.9489	45.8534	41.0987	31.9922	30.4813	31.439	35.6742	35.2411	35.0919			Mpzl1	Mpzl1	Mpzl1	chr1:165592180-165634541	KSR	2i	OK	40.6088	31.3467	-0.37348	5.21143	1.87393e-07	3.71923e-06	yes			Hspa5	Hspa5	Hspa5	chr2:34772089-34776529	KSR	ETP	OK	260.736	294.123	0.173829	-3.03071
											Adig	0	0	0	0	0	0	0	0	0			Nmd3	Nmd3	Nmd3	chr3:69722054-69749046	KSR	2i	OK	99.7976	75.7784	-0.397217	5.2072	1.91715e-07	3.7987e-06	yes			Stmn3	Stmn3	Stmn3	chr2:181306458-181314500	KSR	ETP	OK	3.23233	6.49737	1.00728	-3.02897
											Adipoq	0	0	0.13649	0.288282	0.475771	0.470662	0	0	0			Etnk1	Etnk1	Etnk1	chr6:143167229-143208547	KSR	2i	OK	44.3121	56.5008	0.350568	-5.20369	1.95372e-07	3.86474e-06	yes			Sema7a	Sema7a	Sema7a	chr9:57940134-57962865	KSR	ETP	OK	3.26588	5.00096	0.614734	-3.02349
											Adipor1	42.8406	44.3873	44.3232	44.2746	46.3104	50.0807	46.7067	45.4465	46.1204			Slc4a2	Slc4a2	Slc4a2	chr5:24425231-24440947	KSR	2i	OK	10.6502	6.80884	-0.645402	5.20251	1.96617e-07	3.88294e-06	yes			Tm9sf3	Tm9sf3	Tm9sf3	chr19:41210841-41264004	KSR	ETP	OK	21.8344	26.5692	0.283152	-3.02213
											Adipor2	28.4757	31.9619	29.3379	23.0013	23.247	24.624	23.1747	24.6832	24.7223			Syce2	Syce2	Syce2	chr8:84872110-84893921	KSR	2i	OK	31.3988	47.9508	0.610846	-5.20188	1.97287e-07	3.88974e-06	yes			Ephb2	Ephb2	Ephb2	chr4:136653609-136835935	KSR	ETP	OK	5.57287	7.62026	0.45142	-3.02108
											Adk	20.1372	18.1711	18.1789	19.4881	22.5083	19.1012	20.7335	20.6664	19.3892			Mtap4	Mtap4	Mtap4	chr9:109931773-110083954	KSR	2i	OK	56.6088	64.9288	0.197831	-5.20048	1.98769e-07	3.91252e-06	yes			Slc11a2	Slc11a2	Slc11a2	chr15:100387899-100423055	KSR	ETP	OK	12.0778	15.1957	0.331312	-3.02045
											Adm	0.0885682	0.424641	0.219113	0.505783	0.376274	0.305743	0.233901	0.557732	0.5373			Klf6	Klf6	Klf6	chr13:5861488-5870393	KSR	2i	OK	13.3957	8.98763	-0.575761	5.1995	1.99826e-07	3.92685e-06	yes			1110012J17Rik	1110012J17Rik	1110012J17Rik	chr17:66336981-66449750	KSR	ETP	OK	16.8711	20.7143	0.296069	-3.0192
											Adm2	2.02885	1.77038	1.80364	1.18735	0.779749	1.22107	1.98873	2.49909	2.2308			Mycn	Mycn	Mycn	chr12:12936092-12941836	KSR	2i	OK	18.1054	11.61	-0.641055	5.19817	2.01263e-07	3.94859e-06	yes			Dcbld1	Dcbld1	Dcbld1	chr10:52233618-52321377	KSR	ETP	OK	28.5412	35.4707	0.313583	-3.01823
											Adnp	26.3624	27.79	27.5754	24.8344	24.1623	26.6807	26.6728	26.7554	25.6974			Fam168a	Fam168a	Fam168a	chr7:100706701-100841630	KSR	2i	OK	13.1288	9.34305	-0.490768	5.19735	2.02144e-07	3.95937e-06	yes			Galnt11	Galnt11	Galnt11	chr5:25222892-25265918	KSR	ETP	OK	18.5223	23.9066	0.368147	-3.0131
											Adnp2	16.276	16.2511	17.2161	18.8919	19.5842	18.6048	16.3892	16.1483	15.5034			Cachd1	Cachd1	Cachd1	chr4:100776678-101003748	KSR	2i	OK	1.99853	3.9729	0.991255	-5.1832	2.18108e-07	4.26506e-06	yes			Poglut1	Poglut1	Poglut1	chr16:38525179-38550184	KSR	ETP	OK	50.1636	61.1075	0.284709	-3.01319
											Ado	8.93095	9.78764	8.9434	11.5749	11.8583	10.849	9.68305	9.44104	8.81136			Setd7	Setd7	Setd7	chr3:51515317-51567116	KSR	2i	OK	2.88908	1.49159	-0.953756	5.18228	2.19195e-07	4.27931e-06	yes			Pdia6	Pdia6	Pdia6	chr12:17266594-17324730	KSR	ETP	OK	137.67	163.92	0.251784	-3.00769
											Adora1	0.0997208	0.100827	0.0755215	2.37257	2.34672	2.23174	0.433311	0.549696	0.639497			Gm12504	Gm12504	Gm12504	chr4:44121892-44124123	KSR	2i	OK	97.5105	124.879	0.356901	-5.17867	2.23476e-07	4.35578e-06	yes			Dap3	Dap3	Dap3	chr3:88920802-88950282	KSR	ETP	OK	30.7608	37.0816	0.26961	-3.00301
											Adora2a	0.153319	0.0723198	0.297101	0.321941	0.222357	0.505864	0.0831694	0.148733	0.534657			Dok2	Dok2	Dok2	chr14:70774380-70778494	KSR	2i	OK	4.37378	0.962429	-2.18413	5.17729	2.25136e-07	4.37385e-06	yes			Frat1	Frat1	Frat1	chr19:41829969-41832583	KSR	ETP	OK	1.92974	3.48923	0.854505	-3.00219
											Adora2b	1.70671	1.88455	2.44191	2.53313	2.7672	2.81598	2.97833	2.89887	2.03278			Timeless	Timeless	Timeless	chr10:128232062-128252941	KSR	2i	OK	25.386	31.1193	0.293779	-5.17741	2.24983e-07	4.37385e-06	yes			Cdkl2	Cdkl2	Cdkl2	chr5:92006074-92043018	KSR	ETP	OK	3.66313	5.22335	0.511898	-3.00223
											Adora3	0.0922974	0	0	0	0	0	0	0	0			Chst15	Chst15	Chst15	chr7:132236254-132318291	KSR	2i	OK	1.70523	0.375534	-2.18295	5.17565	2.27118e-07	4.4052e-06	yes			Ino80d	Ino80d	Ino80d	chr1:63047800-63114267	KSR	ETP	OK	4.53826	5.45884	0.266454	-3.00016
											Adpgk	27.3622	29.5306	29.7998	26.0078	25.5713	26.3048	33.225	32.2745	31.1593			Actr2	Actr2	Actr2	chr11:20062303-20112951	KSR	2i	OK	106.134	133.802	0.334211	-5.16962	2.34572e-07	4.53572e-06	yes			Ly75	Ly75	Ly75	chr2:60293759-60383231	KSR	ETP	OK	10.1697	13.0258	0.357101	-2.99948
											Adprh	106.846	105.931	108.738	88.5971	90.5427	89.1719	89.509	90.372	95.2709			H2afx	H2afx	H2afx	chr9:44334714-44336073	KSR	2i	OK	342.9	270.775	-0.340692	5.16959	2.34606e-07	4.53572e-06	yes			Sorcs2	Sorcs2	Sorcs2	chr5:36017180-36398139	KSR	ETP	OK	0.792156	1.44222	0.864432	-2.99848
											Adprhl1	0.0800044	0.112334	0.0657775	0.10009	0.141561	0.0784973	0.199982	0	0.0698953			P4hb	P4hb	P4hb	chr11:120560303-120572936	KSR	2i	OK	231.34	184.355	-0.327527	5.16782	2.36836e-07	4.57143e-06	yes			Tob2	Tob2	Tob2	chr15:81848269-81858326	KSR	ETP	OK	5.53747	7.718	0.479001	-2.99699
											Adprhl2	15.9319	15.7441	16.4417	13.8477	15.2378	16.5325	17.8512	18.3596	20.9455			Ada	Ada	Ada	chr2:163726583-163750177	KSR	2i	OK	9.91485	4.54907	-1.12402	5.16489	2.40586e-07	4.63633e-06	yes			Tceb1	Tceb1	Tceb1	chr1:16642764-16656865	KSR	ETP	OK	110.159	134.855	0.291822	-2.9944
											Adra1a	0	0.0937459	0.0209749	0.0313599	0.110249	0.0262755	0.0412872	0.0747649	0.0886471			Fgf10	Fgf10	Fgf10	chr13:118714698-118792573	KSR	2i	OK	1.57462	0.334851	-2.23341	5.15766	2.50057e-07	4.81107e-06	yes			Retsat	Retsat	Retsat	chr6:72598627-72607488	KSR	ETP	OK	6.58635	9.80747	0.574402	-2.99347
											Adra1b	0.0369683	0	0	0.0475624	0.0324901	0.0373337	0.031011	3.95281e-06	0			Skil	Skil	Skil	chr3:31095060-31122577	KSR	2i	OK	10.4293	7.69615	-0.438438	5.15582	2.52517e-07	4.8506e-06	yes			Fam33a	Fam33a	Fam33a	chr11:87109260-87122974	KSR	ETP	OK	21.2575	28.2954	0.412598	-2.99097
											Adra1d	0	0	0	0	0.0584179	0	0	0	0.0560317			Myo5b	Myo5b	Myo5b	chr18:74442618-74771477	KSR	2i	OK	1.21772	0.31219	-1.96369	5.15169	2.58147e-07	4.94358e-06	yes			Snrpd1	Snrpd1	Snrpd1	chr18:10617795-10628230	KSR	ETP	OK	171.378	206.879	0.271604	-2.98959
											Adra2a	0	0.062593	0.0711585	0.0520305	0.147243	0.167697	0.10318	0.126193	0.107837			Sh3gl2	Sh3gl2	Sh3gl2	chr4:85205455-85389379	KSR	2i	OK	8.17844	13.2349	0.694446	-5.15166	2.58185e-07	4.94358e-06	yes			Pias2	Pias2	Pias2	chr18:77065207-77155708	KSR	ETP	OK	74.7064	84.4065	0.176123	-2.97498
											Adra2b	0.217773	0.366904	0.409795	1.06321	1.23551	1.29879	0.873392	0.896253	1.64315			Rev1	Rev1	Rev1	chr1:37998009-38129662	KSR	2i	OK	15.705	10.8523	-0.533225	5.14701	2.64666e-07	5.05957e-06	yes			Arpc4	Arpc4	Arpc4	chr6:113378112-113414571	KSR	ETP	OK	67.8666	81.3785	0.261947	-2.96929
											Adra2c	0.0514891	0.0788365	0.0439143	0.135563	0.142334	0.10472	0.0886723	0.163422	0.0912737			Pla1a	Pla1a	Pla1a	chr16:38396116-38433145	KSR	2i	OK	2.93964	6.80161	1.21023	-5.14165	2.72335e-07	5.19785e-06	yes			Osgin2	Osgin2	Osgin2	chr4:15997120-16013877	KSR	ETP	OK	7.96593	11.012	0.467161	-2.96839
											Adrb1	0.645146	0.505601	0.354814	3.1615	3.26883	2.9784	1.54237	1.16637	1.14781			Atp2a3	Atp2a3	Atp2a3	chr11:72961168-72993043	KSR	2i	OK	6.76381	10.0444	0.570483	-5.13906	2.76119e-07	5.26168e-06	yes			Gpbp1	Gpbp1	Gpbp1	chr13:111425679-111490041	KSR	ETP	OK	60.3446	64.7197	0.100979	-2.96402
											Adrb2	0.984422	1.32512	0.969258	2.5466	2.53779	3.12536	2.81549	2.80598	2.60132			Neto2	Neto2	Neto2	chr8:85636587-85691009	KSR	2i	OK	2.07686	0.813457	-1.35227	5.13779	2.77989e-07	5.28888e-06	yes			Pgam1	Pgam1	Pgam1	chr19:41911870-41918665	KSR	ETP	OK	492.648	581.138	0.238324	-2.96238
											Adrb3	12.5344	12.5232	11.3936	7.40564	8.09506	8.11911	6.90922	7.00663	8.50252			Fbxo2	Fbxo2	Fbxo2	chr4:148160667-148166417	KSR	2i	OK	29.4095	17.969	-0.710776	5.1315	2.87437e-07	5.45994e-06	yes			1810031K17Rik	1810031K17Rik	1810031K17Rik	chr1:75135214-75142368	KSR	ETP	OK	5.70394	8.19843	0.523389	-2.96114
											Adrbk1	24.0848	21.1969	23.5377	20.5018	21.7218	20.5687	21.7414	22.0561	21.323			Fgf1	Fgf1	Fgf1	chr18:38838672-38971274	KSR	2i	OK	1.66633	0.226064	-2.88187	5.12835	2.92295e-07	5.54339e-06	yes			Utp23	Utp23	Utp23	chr15:51877440-51884622	KSR	ETP	OK	10.8774	14.4018	0.404913	-2.95701
											Adrbk2	1.63998	1.89569	1.97952	1.53031	1.33321	1.47896	1.51506	1.45972	1.54541			Epb4.1l4a	Epb4.1l4a	Epb4.1l4a	chr18:33796326-34007206	KSR	2i	OK	23.2483	31.5381	0.439972	-5.11321	3.16734e-07	5.99737e-06	yes			Zfp960	Zfp960	Zfp960	chr17:17064102-17089631	KSR	ETP	OK	38.5189	45.795	0.249623	-2.95246
											Adrm1	121.34	113.13	122.009	105.872	125.079	117.195	135.919	137.393	138.598			Klf9	Klf9	Klf9	chr19:23141225-23166911	KSR	2i	OK	44.7782	33.5967	-0.414478	5.10743	3.26569e-07	6.1738e-06	yes			Whsc1	Whsc1	Whsc1	chr5:33843111-33897966	KSR	ETP	OK	9.88449	11.7452	0.248838	-2.95047
											Adsl	58.5475	53.7005	54.6608	57.8674	53.7807	55.9393	57.4707	53.7183	53.651			Rasl11a	Rasl11a	Rasl11a	chr5:146845070-146847726	KSR	2i	OK	11.3959	4.66662	-1.28806	5.10333	3.3373e-07	6.29923e-06	yes			Zscan22	Zscan22	Zscan22	chr7:12897814-12908239	KSR	ETP	OK	3.23133	5.13371	0.667874	-2.94793
											Adss	57.5417	65.1924	58.1676	70.366	63.7462	67.8915	72.321	67.3865	68.6498			Pcolce	Pcolce	Pcolce	chr5:137605106-137611404	KSR	2i	OK	58.1214	78.7088	0.437455	-5.10302	3.34268e-07	6.29943e-06	yes			Wfs1	Wfs1	Wfs1	chr5:36966103-36988982	KSR	ETP	OK	7.27943	9.94725	0.450473	-2.94526
											Adssl1	1.10059	1.11158	1.35343	0.729229	0.60341	0.60004	1.19915	0.961343	1.23824			AW555464	AW555464	AW555464	chr12:112722173-112746591	KSR	2i	OK	9.54377	6.48698	-0.557013	5.1019	3.36255e-07	6.32688e-06	yes			Cops2	Cops2	Cops2	chr2:125830303-125859018	KSR	ETP	OK	70.9826	84.6583	0.254185	-2.94404
											Aebp1	0.378188	0.267003	0.450578	0.771638	0.960683	0.974877	0.832548	0.90765	1.07503			Tek	Tek	Tek	chr4:94739299-94874939	KSR	2i	OK	3.03649	1.32859	-1.19252	5.10127	3.37379e-07	6.33806e-06	yes			Sqle	Sqle	Sqle	chr15:59315091-59331193	KSR	ETP	OK	64.1947	77.1945	0.266044	-2.9434
											Aebp2	30.791	30.4519	35.7668	44.1726	45.2083	44.5883	36.47	45.0514	34.2186			Tex13	Tex13	Tex13	chrX:140808306-140813433	KSR	2i	OK	4.29727	1.40631	-1.61151	5.09649	3.46009e-07	6.48998e-06	yes			Rbpj	Rbpj	Rbpj	chr5:53555778-53657445	KSR	ETP	OK	92.493	103.801	0.166401	-2.93517
											Aen	36.557	39.1088	39.6632	44.1702	41.6552	47.4279	45.5317	44.0686	44.0404			Dmrtc1c2	Dmrtc1c2	Dmrtc1c2	chrX:102847638-102854616	KSR	2i	OK	12.3653	6.2313	-0.988696	5.09058	3.56978e-07	6.68523e-06	yes			Fxyd5	Fxyd5	Fxyd5	chr7:31032722-31042322	KSR	ETP	OK	3.29478	6.3937	0.956469	-2.93467
											Aes	157.716	134.032	152.815	130.161	139.175	146.635	114.239	125.743	122.257			Cst3	Cst3	Cst3	chr2:148871731-148875468	KSR	2i	OK	67.6231	44.5039	-0.603585	5.09003	3.58013e-07	6.69411e-06	yes			C230081A13Rik	C230081A13Rik	C230081A13Rik	chr9:56201128-56418050	KSR	ETP	OK	3.27417	4.29287	0.390811	-2.93233
											Afap1	2.94807	2.83438	3.35258	2.066	2.05703	2.10251	2.75054	3.20078	3.11389			Dmrtc1c1	Dmrtc1c1	Dmrtc1c1	chrX:102802962-102809942	KSR	2i	OK	12.364	6.2313	-0.988535	5.08956	3.58894e-07	6.70009e-06	yes			Sarnp	Sarnp	Sarnp	chr10:128821770-128877638	KSR	ETP	OK	127.727	154.32	0.272852	-2.92755
											Afap1l1	1.4989	1.46397	0.682795	1.00002	0.820526	0.713801	2.35158	2.73901	1.90543			Cyp1b1	Cyp1b1	Cyp1b1	chr17:79706952-79715041	KSR	2i	OK	1.27601	0.0831306	-3.94012	5.08386	3.6985e-07	6.89386e-06	yes			Hspa13	Hspa13	Hspa13	chr16:75755190-75766818	KSR	ETP	OK	7.023	9.10316	0.374279	-2.9202
											Afap1l2	0.751071	0.604736	0.725432	1.03809	0.999277	1.19973	1.62676	1.75348	1.01968			Emp2	Emp2	Emp2	chr16:10281748-10313968	KSR	2i	OK	7.75973	4.44222	-0.804727	5.07902	3.79384e-07	7.06056e-06	yes			Wnt11	Wnt11	Wnt11	chr7:98838844-98854747	KSR	ETP	OK	0.930993	1.98059	1.08908	-2.91874
											Aff1	16.3651	19.7042	18.6279	9.30388	10.1974	10.1333	10.3053	11.2068	11.0259			Sh3bp1	Sh3bp1	Sh3bp1	chr15:78899785-78912052	KSR	2i	OK	13.2998	21.1845	0.671608	-5.07781	3.81811e-07	7.09468e-06	yes			2410002O22Rik	2410002O22Rik	2410002O22Rik	chr13:104142152-104178466	KSR	ETP	OK	26.289	30.5442	0.216438	-2.91811
											Aff2	0	0.0203596	0	0	0.0236271	0	0.0229711	0	0.0242228			Pls1	Pls1	Pls1	chr9:95752641-95845279	KSR	2i	OK	3.80379	1.66771	-1.18957	5.07588	3.85715e-07	7.15609e-06	yes			Zfp953	Zfp953	Zfp953	chr13:67339308-67360572	KSR	ETP	OK	2.31217	3.45942	0.581283	-2.91618
											Aff3	0.603627	0.53169	0.707807	0.740706	0.803254	1.00991	0.962382	1.07984	0.875704			Ctcfl	Ctcfl	Ctcfl	chr2:173093608-173119525	KSR	2i	OK	2.51622	0.656508	-1.93837	5.07229	3.93062e-07	7.26982e-06	yes			Tram2	Tram2	Tram2	chr1:21001377-21079225	KSR	ETP	OK	3.27022	5.95691	0.865175	-2.91587
											Aff4	18.7445	23.1602	20.5787	21.3127	21.2175	21.2359	19.4237	20.0822	18.4995			Rbm44	Rbm44	Rbm44	chr1:91145102-91170795	KSR	2i	OK	4.78734	2.39582	-0.998702	5.07258	3.92461e-07	7.26982e-06	yes			Zfp354c	Zfp354c	Zfp354c	chr11:50811084-50827731	KSR	ETP	OK	2.3344	3.42595	0.553457	-2.91303
											Afg3l1	22.9385	26.7036	25.8898	18.6722	21.5683	21.5074	21.6803	23.1189	23.7965			Hkdc1	Hkdc1	Hkdc1	chr10:62383136-62422457	KSR	2i	OK	1.77374	0.280036	-2.66312	5.07174	3.94187e-07	7.27936e-06	yes			D1Ertd622e	D1Ertd622e	D1Ertd622e	chr1:97643901-97662018	KSR	ETP	OK	2.66999	4.31032	0.690965	-2.90895
											Afg3l2	33.4468	37.9642	36.0891	34.422	39.2653	36.9653	36.5615	37.2322	36.5842			Eif5	Eif5	Eif5	chr12:111538100-111546753	KSR	2i	OK	113.201	91.8314	-0.301823	5.06141	4.16169e-07	7.67344e-06	yes			Aspa	Aspa	Aspa	chr11:73304987-73324634	KSR	ETP	OK	3.26914	5.71589	0.806069	-2.9045
											Afm	0	0	0	0	0	0	0	0	0			Npepps	Npepps	Npepps	chr11:97205855-97280576	KSR	2i	OK	41.7328	54.0081	0.371993	-5.05091	4.39715e-07	8.09509e-06	yes			Htra2	Htra2	Htra2	chr6:83034223-83054571	KSR	ETP	OK	31.633	40.0507	0.340394	-2.90425
											Afmid	0.983982	0.824892	1.10892	1.16841	0.611029	0.652292	1.14258	1.23985	0.927992			1700061G19Rik	1700061G19Rik	1700061G19Rik	chr17:56875632-56888838	KSR	2i	OK	8.46278	13.9344	0.719446	-5.04013	4.65208e-07	8.55124e-06	yes			Ezh2	Ezh2	Ezh2	chr6:47530273-47595030	KSR	ETP	OK	97.1579	110.895	0.190786	-2.8943
											Afp	0	0.0408099	0.0477592	0.187371	0.137468	0.316857	0.274256	0.257916	0.277107			Scml2	Scml2	Scml2	chrX:161162771-161258213	KSR	2i	OK	24.0466	17.8334	-0.431246	5.03951	4.6672e-07	8.56584e-06	yes			H2-M5	H2-M5	H2-M5	chr17:36986854-36989504	KSR	ETP	OK	13.8682	19.64	0.502018	-2.89351
											Aftph	7.90773	8.28624	8.95162	9.90834	10.7274	10.8126	9.91518	9.46169	9.64054			Mt1	Mt1	Mt1	chr8:94179088-94180327	KSR	2i	OK	216.159	158.693	-0.445852	5.03792	4.70606e-07	8.62393e-06	yes			Dna2	Dna2	Dna2	chr10:62947028-62974188	KSR	ETP	OK	18.7913	23.2523	0.307305	-2.88759
											Aga	3.34495	4.02849	4.4417	7.57605	8.35676	7.25041	5.66452	6.16009	6.6575			Cacng7	Cacng7	Cacng7	chr7:3336584-3366948	KSR	2i	OK	22.0151	10.7804	-1.03009	5.0363	4.74619e-07	8.68414e-06	yes			Ranbp2	Ranbp2	Ranbp2	chr10:58446851-58494154	KSR	ETP	OK	25.0658	29.766	0.247945	-2.88663
											Agap1	1.88676	1.91275	2.07832	1.69849	1.89482	2.02516	2.30578	2.54866	2.29826			Calu	Calu	Calu	chr6:29348118-29380513	KSR	2i	OK	109.037	99.2208	-0.136099	5.0342	4.7984e-07	8.76625e-06	yes			Tysnd1	Tysnd1	Tysnd1	chr10:61695513-61702773	KSR	ETP	OK	10.7498	14.8346	0.464659	-2.88036
											Agap2	0.0951989	0.106145	0.259063	0.475741	0.459553	0.43968	0.28342	0.161394	0.170227			Tgm1	Tgm1	Tgm1	chr14:55700008-55713492	KSR	2i	OK	22.1947	15.4906	-0.518822	5.03283	4.83297e-07	8.81594e-06	yes			Zfp828	Zfp828	Zfp828	chr8:13869640-13881639	KSR	ETP	OK	21.9554	27.0061	0.298705	-2.87892
											Agap3	15.4567	13.968	15.4171	13.0442	16.3874	14.9021	15.4142	16.5861	16.7665			Armcx4	Armcx4	Armcx4	chrX:134686518-134697772	KSR	2i	OK	2.76181	4.32628	0.647513	-5.02513	5.03086e-07	9.16292e-06	yes			Akap8	Akap8	Akap8	chr17:32303675-32321153	KSR	ETP	OK	48.9254	58.5251	0.258473	-2.87756
											Agbl1	0	0	0	0	0	0	0	0.025318	0			Cpm	Cpm	Cpm	chr10:117629499-117687352	KSR	2i	OK	1.59443	0.46626	-1.77383	5.02357	5.07205e-07	9.22387e-06	yes			Ppp1cb	Ppp1cb	Ppp1cb	chr5:32458969-32493712	KSR	ETP	OK	75.3428	88.966	0.239785	-2.87704
											Agbl2	0.0891544	0.181419	0.0754931	0.114366	0.130234	0.0633102	0.0760528	0.183225	0.105288			Igdcc3	Igdcc3	Igdcc3	chr9:65141188-65185870	KSR	2i	OK	6.06677	10.207	0.750564	-5.0229	5.08982e-07	9.24212e-06	yes			Gm19510	Gm19510	Gm19510	chr15:59788416-59794959	KSR	ETP	OK	0.393808	1.47189	1.90211	-2.87368
											Agbl3	0.0882946	0.110969	0.0494368	0.208509	0.373686	0.175874	0.149612	0.234879	0.151187			Tspan6	Tspan6	Tspan6	chrX:133891069-133898429	KSR	2i	OK	12.0612	6.43618	-0.906099	5.02138	5.13019e-07	9.30129e-06	yes			Fkbp14	Fkbp14	Fkbp14	chr6:54577604-54593128	KSR	ETP	OK	1.65826	2.95896	0.835417	-2.87013
											Agbl4	0	0	0	0.306393	0.247818	0.0629085	0.0525483	0.0497253	0			Pdha2	Pdha2	Pdha2	chr3:141210003-141212355	KSR	2i	OK	5.4848	2.3306	-1.23473	5.0186	5.20497e-07	9.42258e-06	yes			Rgs3	Rgs3	Rgs3	chr4:62559846-62703019	KSR	ETP	OK	3.65877	5.28464	0.530446	-2.86755
											Agbl5	3.31869	2.79239	3.48655	2.73922	3.37799	3.17994	3.93243	4.19713	4.87117			Tsen34	Tsen34	Tsen34	chr7:3693609-3701035	KSR	2i	OK	61.1676	79.7214	0.382198	-5.01733	5.23951e-07	9.47076e-06	yes			Srxn1	Srxn1	Srxn1	chr2:152105729-152111353	KSR	ETP	OK	24.6714	30.728	0.31671	-2.86658
											Ager	0.505758	0.292949	0.204751	0.198262	0.207358	0.222546	0.269485	0.181075	0.203148			Axin2	Axin2	Axin2	chr11:108920348-108950781	KSR	2i	OK	3.2474	5.8299	0.844186	-5.01505	5.30186e-07	9.56898e-06	yes			Rgl1	Rgl1	Rgl1	chr1:152517529-152625111	KSR	ETP	OK	1.65633	2.73087	0.721375	-2.86522
											Agfg1	37.9181	42.3235	37.1778	41.3612	40.9383	41.7061	40.5461	36.8129	36.6277			Cwc22	Cwc22	Cwc22	chr2:77895652-77946353	KSR	2i	OK	35.1563	27.6735	-0.345281	5.01401	5.33065e-07	9.59512e-06	yes			Espl1	Espl1	Espl1	chr15:102296292-102324356	KSR	ETP	OK	31.4813	37.6072	0.256512	-2.86226
											Agfg2	7.15693	9.03715	9.24162	4.87843	7.27805	6.2988	5.38715	6.44288	7.31979			Dkk1	Dkk1	Dkk1	chr19:30545884-30549496	KSR	2i	OK	2.76381	0.360461	-2.93874	5.01395	5.3324e-07	9.59512e-06	yes			Rap2c	Rap2c	Rap2c	chrX:51003913-51018018	KSR	ETP	OK	9.26317	12.1844	0.395454	-2.86048
											Aggf1	22.9138	24.4435	22.3575	23.8121	24.1521	23.8083	23.7612	22.6792	21.4381			Ddx4	Ddx4	Ddx4	chr13:112598332-112652310	KSR	2i	OK	6.27385	3.1279	-1.00416	5.01296	5.35995e-07	9.63019e-06	yes			Zfp292	Zfp292	Zfp292	chr4:34803109-34882948	KSR	ETP	OK	6.62959	8.26477	0.318054	-2.85909
											Agk	18.8399	19.8862	19.9976	16.5078	17.7691	19.0253	18.2999	15.9648	18.0299			Cpt1c	Cpt1c	Cpt1c	chr7:44959371-44974851	KSR	2i	OK	15.4438	10.1463	-0.606076	5.01126	5.40737e-07	9.70079e-06	yes			Clint1	Clint1	Clint1	chr11:45851963-45910625	KSR	ETP	OK	31.3098	38.1225	0.28403	-2.8517
											Agl	4.45967	4.31895	4.80307	5.36959	3.6164	4.24889	4.38967	4.36797	4.08434			4930506M07Rik	4930506M07Rik	4930506M07Rik	chr19:58973357-59076069	KSR	2i	OK	3.21928	1.39178	-1.2098	5.00751	5.51391e-07	9.8771e-06	yes			Arl6	Arl6	Arl6	chr16:59613320-60605531	KSR	ETP	OK	20.3271	26.7532	0.39631	-2.85089
											Agmat	0.0859864	0.124016	0.074246	0.104607	0.149552	0	0.355368	0.542325	0.224751			Slc30a2	Slc30a2	Slc30a2	chr4:134343045-134354484	KSR	2i	OK	6.22533	10.0844	0.695908	-5.00361	5.62678e-07	1.00642e-05	yes			Slc35b2	Slc35b2	Slc35b2	chr17:45564151-45567669	KSR	ETP	OK	19.1633	24.6374	0.362506	-2.84948
											Agmo	0	0	0	0	0	0	0	0	0			Gcat	Gcat	Gcat	chr15:79030873-79043558	KSR	2i	OK	18.6007	26.55	0.513357	-5.00289	5.64763e-07	1.00864e-05	yes			Nr1d2	Nr1d2	Nr1d2	chr14:18204055-18239106	KSR	ETP	OK	5.71904	7.604	0.410985	-2.84879
											Agpat1	29.9834	28.7813	28.9743	22.8559	28.1775	28.0129	31.5796	34.4544	30.4573			Dnase2a	Dnase2a	Dnase2a	chr8:84908623-84911461	KSR	2i	OK	12.9076	21.0806	0.707696	-4.99927	5.75465e-07	1.02622e-05	yes			Phc3	Phc3	Phc3	chr3:30899294-30969415	KSR	ETP	OK	1.57089	2.14643	0.450351	-2.83829
											Agpat2	29.5996	25.0695	31.5735	31.4634	32.9761	30.3135	26.8193	30.9711	28.5298			Enah	Enah	Enah	chr1:181904444-182019980	KSR	2i	OK	69.5132	55.4092	-0.327161	4.99698	5.82345e-07	1.03694e-05	yes			Eif2ak3	Eif2ak3	Eif2ak3	chr6:70844526-70905240	KSR	ETP	OK	8.53785	11.0547	0.372721	-2.83796
											Agpat3	6.52931	7.06487	7.1478	5.85029	7.38734	7.80815	7.67198	6.43609	6.43577			Synj2	Synj2	Synj2	chr17:5941279-6079739	KSR	2i	OK	1.70387	0.427463	-1.99495	4.99236	5.96452e-07	1.06048e-05	yes			Zfp740	Zfp740	Zfp740	chr15:102208266-102215601	KSR	ETP	OK	45.2405	54.021	0.255906	-2.83812
											Agpat4	7.57749	7.67651	7.29207	10.9452	12.257	12.8544	12.8129	12.6292	13.0783			Atxn1l	Atxn1l	Atxn1l	chr8:109726450-109737739	KSR	2i	OK	4.33627	2.66249	-0.703679	4.98464	6.20772e-07	1.10044e-05	yes			Pop1	Pop1	Pop1	chr15:34495310-34530653	KSR	ETP	OK	17.5055	21.9542	0.326692	-2.83729
											Agpat5	17.2103	17.2048	17.903	19.6281	20.4383	21.9803	20.8409	20.4243	19.8732			Snx1	Snx1	Snx1	chr9:66088126-66124886	KSR	2i	OK	36.4873	25.9867	-0.489619	4.98465	6.20743e-07	1.10044e-05	yes			Ppil1	Ppil1	Ppil1	chr17:29250834-29263971	KSR	ETP	OK	99.5926	120.28	0.272281	-2.83585
											Agpat6	14.7903	18.2282	16.5384	17.8515	19.3569	19.7832	18.7567	17.5902	17.8688			Timp2	Timp2	Timp2	chr11:118301060-118355411	KSR	2i	OK	2.69776	0.91055	-1.56695	4.98148	6.31012e-07	1.11694e-05	yes			Tmem126a	Tmem126a	Tmem126a	chr7:90450711-90457208	KSR	ETP	OK	60.0546	76.17	0.342949	-2.83476
											Agpat9	0.179983	0.345233	0.154393	3.98983	2.8796	3.60897	3.81876	3.63326	3.49328			Cdc42ep1	Cdc42ep1	Cdc42ep1	chr15:78842646-78855529	KSR	2i	OK	3.85339	1.30407	-1.5631	4.97724	6.44983e-07	1.13998e-05	yes			Pcna	Pcna	Pcna	chr2:132249285-132253180	KSR	ETP	OK	347.881	407.924	0.229706	-2.83381
											Agphd1	0.749738	0.966429	0.540079	0.562597	0.556262	0.735187	0.427569	0.49636	0.740033			Sulf1	Sulf1	Sulf1	chr1:12692429-12860372	KSR	2i	OK	4.79677	2.64708	-0.85766	4.9766	6.47102e-07	1.14203e-05	yes			Tmem183a	Tmem183a	Tmem183a	chr1:134346096-134361999	KSR	ETP	OK	41.9716	48.5941	0.211367	-2.83124
											Agps	18.9327	21.127	18.7231	20.1901	20.2977	21.8018	20.1146	20.1889	18.6249			X99384	X99384	X99384	chr10:61319656-61383523	KSR	2i	OK	21.3325	28.6055	0.423242	-4.97426	6.54971e-07	1.15422e-05	yes			Gfpt1	Gfpt1	Gfpt1	chr6:87042845-87092207	KSR	ETP	OK	10.0136	12.4639	0.315792	-2.82794
											Agr2	0	0	0	0	0	0	0	0	0			Gstm5	Gstm5	Gstm5	chr3:107877229-107898685	KSR	2i	OK	11.3421	4.16366	-1.44576	4.97177	6.63437e-07	1.16741e-05	yes			Topors	Topors	Topors	chr4:40259605-40270221	KSR	ETP	OK	36.0416	43.3405	0.266054	-2.82799
											Agr3	0	0	0	0	0	0	0	0	0			Suv39h1	Suv39h1	Suv39h1	chrX:8061170-8074760	KSR	2i	OK	15.5142	10.3117	-0.589307	4.97117	6.65503e-07	1.16933e-05	yes			Esco2	Esco2	Esco2	chr14:65819026-65833969	KSR	ETP	OK	49.0492	58.8202	0.26208	-2.82782
											Agrn	35.7164	38.3907	38.6515	16.7514	21.9048	21.8036	30.8696	33.9359	30.824			Miip	Miip	Miip	chr4:147860777-147868719	KSR	2i	OK	9.16404	4.39949	-1.05865	4.9705	6.67822e-07	1.17168e-05	yes			Pdgfa	Pdgfa	Pdgfa	chr5:138976971-138994953	KSR	ETP	OK	21.1557	29.0702	0.458492	-2.82654
											Agrp	0	0.21961	0.397848	0.201807	0.134911	0.302796	0	0	0			Gpt2	Gpt2	Gpt2	chr8:85492616-85527558	KSR	2i	OK	18.3766	25.2846	0.460386	-4.96935	6.71781e-07	1.1769e-05	yes			Fam198b	Fam198b	Fam198b	chr3:79885929-79946278	KSR	ETP	OK	4.57473	6.03045	0.398579	-2.82633
											Agt	0.066903	0	0	0	0	0	0	0	0			Rasa4	Rasa4	Rasa4	chr5:136083915-136111860	KSR	2i	OK	7.999	12.8153	0.679977	-4.96513	6.86551e-07	1.20101e-05	yes			Thtpa	Thtpa	Thtpa	chr14:55094783-55106593	KSR	ETP	OK	5.43351	7.70117	0.503193	-2.82353
											Agtpbp1	5.00372	4.95645	4.45875	5.56731	5.57473	5.66247	4.58218	5.07833	5.07228			Rlim	Rlim	Rlim	chrX:103957166-103981284	KSR	2i	OK	14.5227	10.7879	-0.428886	4.96278	6.94929e-07	1.21389e-05	yes			Traf3ip1	Traf3ip1	Traf3ip1	chr1:91494667-91529307	KSR	ETP	OK	6.44139	8.72881	0.438412	-2.82238
											Agtr1a	0.0547273	0.038355	0.0438823	0	0.132656	0.267387	0.166133	0.0782649	0.087771			Otx2	Otx2	Otx2	chr14:48658183-48662872	KSR	2i	OK	7.36468	3.16034	-1.22054	4.96198	6.97771e-07	1.21708e-05	yes			Tmed2	Tmed2	Tmed2	chr5:124540790-124550503	KSR	ETP	OK	115.103	136.144	0.242219	-2.82176
											Agtr1b	0	0	0	0.0631343	0	0	0.0419377	0.0385702	0.0452236			Rab11fip5	Rab11fip5	Rab11fip5	chr6:85334961-85374634	KSR	2i	OK	5.13392	7.85802	0.614104	-4.96133	7.00109e-07	1.21937e-05	yes			Hist1h2bc	Hist1h2bc	Hist1h2bc	chr13:23684198-23692480	KSR	ETP	OK	13.1512	20.0332	0.607201	-2.82086
											Agtr2	0	0	0	0.0239309	0	0	0	0	0			Gm7325	Gm7325	Gm7325	chr17:45600966-45602102	KSR	2i	OK	47.5628	68.0794	0.517385	-4.95432	7.25821e-07	1.26232e-05	yes			Ramp2	Ramp2	Ramp2	chr11:101246333-101248250	KSR	ETP	OK	4.20907	7.98674	0.924105	-2.81926
											Agtrap	18.9522	20.3398	17.5403	22.3336	25.1923	24.9713	21.9499	21.1804	19.78			Gaa	Gaa	Gaa	chr11:119267966-119285698	KSR	2i	OK	21.2	16.0021	-0.405802	4.95222	7.33714e-07	1.27419e-05	yes			Dlc1	Dlc1	Dlc1	chr8:36567738-36952442	KSR	ETP	OK	21.3316	25.7094	0.269307	-2.81726
											Agxt	0	0	0	0	0	0	0	0	0.0602838			H3f3a	H3f3a	H3f3a	chr1:180802567-180813603	KSR	2i	OK	388.993	484.369	0.316361	-4.94996	7.42284e-07	1.2872e-05	yes			Ankrd45	Ankrd45	Ankrd45	chr1:161142711-161170507	KSR	ETP	OK	7.55053	9.97273	0.401411	-2.81689
											Agxt2	0	0	0	0	0	0	0	0	0			Ube2l6	Ube2l6	Ube2l6	chr2:84798827-84810003	KSR	2i	OK	31.6465	20.7189	-0.611096	4.94918	7.45264e-07	1.29049e-05	yes			Gas6	Gas6	Gas6	chr8:13465373-13494535	KSR	ETP	OK	7.94267	10.9556	0.463971	-2.81594
											Agxt2l1	0	0	0	0	0	0.0422737	0	0.0326378	0			Atg13	Atg13	Atg13	chr2:91674611-91710592	KSR	2i	OK	21.2058	15.0571	-0.494017	4.94531	7.60221e-07	1.31449e-05	yes			Zbtb7a	Zbtb7a	Zbtb7a	chr10:81136270-81151657	KSR	ETP	OK	5.57654	7.42301	0.412634	-2.81611
											Agxt2l2	2.20579	2.08901	2.52754	2.94905	3.33297	3.43911	3.60584	2.78504	2.88299			Dlgap4	Dlgap4	Dlgap4	chr2:156613704-156764363	KSR	2i	OK	18.0802	12.5945	-0.52161	4.93357	8.07402e-07	1.39405e-05	yes			Mmgt1	Mmgt1	Mmgt1	chrX:56585511-56597919	KSR	ETP	OK	8.64886	11.189	0.371501	-2.81632
											Ahctf1	23.2687	26.4316	24.071	25.6002	25.6291	26.3285	25.546	26.3848	25.4244			Cdc42bpg	Cdc42bpg	Cdc42bpg	chr19:6306456-6325652	KSR	2i	OK	10.7688	7.4776	-0.526212	4.93321	8.089e-07	1.39462e-05	yes			Zfp37	Zfp37	Zfp37	chr4:62189542-62208546	KSR	ETP	OK	4.75958	6.63649	0.479586	-2.81468
											Ahcy	141.898	148.416	141.993	123.568	134.86	136.005	157.891	155.345	155.867			Braf	Braf	Braf	chr6:39603236-39725463	KSR	2i	OK	8.57269	6.20125	-0.467188	4.93179	8.14815e-07	1.40199e-05	yes			Scoc	Scoc	Scoc	chr8:83434492-83458391	KSR	ETP	OK	19.5898	25.1465	0.360252	-2.80965
											Ahcyl1	24.6683	24.9757	23.9712	23.6467	23.3803	25.1769	24.7569	24.9241	25.9264			Tubb2a	Tubb2a	Tubb2a	chr13:34074279-34078008	KSR	2i	OK	101.861	131.539	0.368887	-4.93162	8.15521e-07	1.40199e-05	yes			Haus3	Haus3	Haus3	chr5:34007199-34169448	KSR	ETP	OK	23.8369	30.213	0.341974	-2.80887
											Ahcyl2	5.03948	5.34113	5.38814	5.4843	6.01731	5.92848	5.1551	5.83152	5.70403			Uap1l1	Uap1l1	Uap1l1	chr2:25361491-25365626	KSR	2i	OK	14.0512	22.2927	0.665873	-4.92752	8.32797e-07	1.42964e-05	yes			AI314180	AI314180	AI314180	chr4:58800030-58912725	KSR	ETP	OK	10.0739	12.5732	0.319735	-2.80604
											Ahdc1	11.3058	11.8499	12.9776	11.1904	14.1435	14.7115	12.6545	14.5039	12.9678			Id2	Id2	Id2	chr12:25093798-25096092	KSR	2i	OK	5.65845	1.32551	-2.09386	4.92634	8.37829e-07	1.43621e-05	yes			BC016423	BC016423	BC016423	chr13:3538074-3611108	KSR	ETP	OK	7.96347	9.85853	0.307976	-2.80515
											Ahi1	2.94048	2.88881	3.21058	2.95133	3.34144	3.55683	2.78971	3.77529	3.22067			Ddit4l	Ddit4l	Ddit4l	chr3:137623671-137628332	KSR	2i	OK	10.6084	6.32903	-0.745155	4.92254	8.54284e-07	1.46164e-05	yes			Nus1	Nus1	Nus1	chr10:52417546-52440192	KSR	ETP	OK	22.9608	27.8229	0.277099	-2.80415
											Ahnak	5.0398	4.98061	4.95931	3.55607	4.6339	3.93447	5.47417	5.06447	4.40483			Rhpn1	Rhpn1	Rhpn1	chr15:75704287-75714419	KSR	2i	OK	4.18678	1.3289	-1.65561	4.92235	8.55112e-07	1.46164e-05	yes			Ripply3	Ripply3	Ripply3	chr16:94328421-94336935	KSR	ETP	OK	27.4195	34.9709	0.350955	-2.80366
											Ahr	1.06525	1.0157	1.16475	0.572264	0.725619	0.984871	1.12417	1.32727	0.939179			Tmsb10	Tmsb10	Tmsb10	chr6:72957346-72958748	KSR	2i	OK	1214.45	1495.38	0.300215	-4.9191	8.69441e-07	1.48401e-05	yes			Ogfod1	Ogfod1	Ogfod1	chr8:94037197-94067922	KSR	ETP	OK	8.99869	11.4028	0.341603	-2.80176
											Ahrr	0.109108	0.0322114	0.0370171	0.0275139	0.0185386	0.111382	0.0896274	0.148998	0.0944907			Itpr1	Itpr1	Itpr1	chr6:108213095-108551116	KSR	2i	OK	5.42019	3.67516	-0.560537	4.91809	8.73908e-07	1.48951e-05	yes			Lmna	Lmna	Lmna	chr3:88481148-88503332	KSR	ETP	OK	29.3796	34.9602	0.250898	-2.79794
											Ahsa1	151.794	154.545	148.921	150.346	158.565	153.178	154.182	149.147	156.201			Zfp791	Zfp791	Zfp791	chr8:85109166-85123095	KSR	2i	OK	8.86698	4.77935	-0.891629	4.91341	8.95075e-07	1.52341e-05	yes			Rars	Rars	Rars	chr11:35808380-35834528	KSR	ETP	OK	94.8243	112.504	0.24665	-2.79756
											Ahsa2	16.516	17.8614	17.5945	16.6189	17.3825	17.9777	14.9633	15.7357	16.1912			Mgst3	Mgst3	Mgst3	chr1:167372383-167393797	KSR	2i	OK	31.9635	17.2022	-0.893835	4.91265	8.98543e-07	1.52714e-05	yes			Taf13	Taf13	Taf13	chr3:108571698-108582068	KSR	ETP	OK	27.9416	35.9615	0.364042	-2.7956
											Ahsg	0.841323	1.27044	1.57165	0.60864	0.787237	0.769122	1.81799	1.87434	2.0409			Ifitm1	Ifitm1	Ifitm1	chr7:140967428-140969827	KSR	2i	OK	21.774	37.0422	0.76656	-4.91237	8.99836e-07	1.52717e-05	yes			Cdc6	Cdc6	Cdc6	chr11:98907888-98923942	KSR	ETP	OK	18.9692	23.1137	0.285093	-2.79446
											Aicda	0.0990076	0.0371363	0	0.460918	0.27976	0.145702	0.239443	0.146751	0.406396			Atp5g3	Atp5g3	Atp5g3	chr2:73908449-73911294	KSR	2i	OK	552.682	688.28	0.316546	-4.90581	9.30414e-07	1.57682e-05	yes			Hmgcs1	Hmgcs1	Hmgcs1	chr13:119690461-119708077	KSR	ETP	OK	83.7286	98.669	0.236876	-2.79256
											Aida	10.473	11.9125	10.9236	14.4092	11.1907	13.2447	11.5404	11.2239	10.904			Adam15	Adam15	Adam15	chr3:89339639-89350010	KSR	2i	OK	16.0164	10.7959	-0.569069	4.90464	9.35984e-07	1.58401e-05	yes			Aoc2	Aoc2	Aoc2	chr11:101325062-101329694	KSR	ETP	OK	1.04809	2.13879	1.02903	-2.79132
											Aif1	0	0	0	0	0	0	0	0.0831079	0			Kcnk1	Kcnk1	Kcnk1	chr8:125995101-126030688	KSR	2i	OK	2.84636	0.586118	-2.27986	4.90391	9.39492e-07	1.5877e-05	yes			Xaf1	Xaf1	Xaf1	chr11:72301628-72313733	KSR	ETP	OK	14.8367	19.014	0.357893	-2.79131
											Aif1l	1.20986	1.70447	1.20111	3.06133	3.70375	2.73376	3.2255	2.82006	2.77839			Odc1	Odc1	Odc1	chr12:17544872-17551502	KSR	2i	OK	580.994	470.631	-0.303926	4.90261	9.45719e-07	1.59597e-05	yes			Napsa	Napsa	Napsa	chr7:44572444-44586846	KSR	ETP	OK	2.00295	3.95734	0.982404	-2.78866
											Aifm1	30.3981	31.3546	30.5925	33.039	33.9972	34.3465	25.6169	25.507	24.9119			Plbd1	Plbd1	Plbd1	chr6:136612070-136661893	KSR	2i	OK	3.04237	0.481228	-2.6604	4.89908	9.62857e-07	1.6226e-05	yes			Spn	Spn	Spn	chr7:127133463-127137817	KSR	ETP	OK	1.90264	3.18156	0.741728	-2.77771
											Aifm2	6.91807	8.36339	7.95688	5.14122	5.54196	5.45204	5.86108	6.12082	6.481			AI464131	AI464131	AI464131	chr4:41495600-41503075	KSR	2i	OK	5.33634	8.55341	0.680648	-4.89481	9.83989e-07	1.65587e-05	yes			Tmem147	Tmem147	Tmem147	chr7:30727700-30729534	KSR	ETP	OK	57.4176	72.3735	0.33397	-2.77699
											Aifm3	0.432431	0.211308	0.317912	0.159472	0.515326	0.335433	0.316896	0.422238	0.469064			Pard6b	Pard6b	Pard6b	chr2:168081003-168101203	KSR	2i	OK	13.8325	9.1282	-0.599658	4.88958	1.01053e-06	1.69814e-05	yes			Zcchc10	Zcchc10	Zcchc10	chr11:53324688-53333301	KSR	ETP	OK	51.8365	64.1202	0.306809	-2.77687
											Aig1	1.36461	1.48128	1.30648	0.705684	1.27935	1.52827	1.26627	1.53293	3.23264			Slc25a40	Slc25a40	Slc25a40	chr5:8422849-8454793	KSR	2i	OK	19.5758	13.4501	-0.541453	4.88879	1.01456e-06	1.70252e-05	yes			Ppp2r2c	Ppp2r2c	Ppp2r2c	chr5:36868569-36955078	KSR	ETP	OK	3.10585	4.50371	0.536127	-2.77604
											Aim1	0.0604037	0.167796	0.113349	0.180602	0.126603	0.147562	0.360644	0.403387	0.473998			Agpat4	Agpat4	Agpat4	chr17:12119283-12219640	KSR	2i	OK	15.2878	9.13841	-0.742367	4.88764	1.0205e-06	1.71009e-05	yes			Gcc2	Gcc2	Gcc2	chr10:58255525-58305592	KSR	ETP	OK	5.84069	7.52915	0.36635	-2.77565
											Aim1l	5.32942	4.71645	5.56169	3.88011	4.41205	4.15115	5.15936	5.64958	4.9021			Slc4a5	Slc4a5	Slc4a5	chr6:83237374-83304945	KSR	2i	OK	1.94988	3.69978	0.924059	-4.88614	1.02832e-06	1.72078e-05	yes			Rnf146	Rnf146	Rnf146	chr10:29313165-29362442	KSR	ETP	OK	10.1036	12.2412	0.276873	-2.77423
											Aim2	7.3565	9.07283	8.40094	5.94039	5.86901	5.44067	7.66187	8.17006	8.51505			Esam	Esam	Esam	chr9:37528088-37538319	KSR	2i	OK	4.14399	1.21144	-1.77429	4.87985	1.06166e-06	1.77408e-05	yes			Samd9l	Samd9l	Samd9l	chr6:3372257-3399571	KSR	ETP	OK	0.847866	1.46364	0.787647	-2.77316
											Aimp1	65.2145	63.7614	62.137	63.5015	65.9398	64.1765	67.3062	60.3416	68.3349			Atp6v1g1	Atp6v1g1	Atp6v1g1	chr4:63544764-63550701	KSR	2i	OK	82.3161	109.682	0.414078	-4.87847	1.0691e-06	1.78402e-05	yes			Hoxb9	Hoxb9	Hoxb9	chr11:96271329-96276593	KSR	ETP	OK	1.07723	2.1371	0.98833	-2.77008
											Aimp2	47.6667	44.6062	45.4062	48.9485	49.4772	49.3221	48.331	44.4047	44.1403			Inhbb	Inhbb	Inhbb	chr1:119415464-119422248	KSR	2i	OK	17.7087	12.5886	-0.492336	4.87122	1.10913e-06	1.84824e-05	yes			Rpn1	Rpn1	Rpn1	chr6:88084472-88105304	KSR	ETP	OK	78.9389	92.7218	0.232173	-2.76967
											Aip	20.7211	19.3162	21.8168	15.9475	17.2753	17.0126	19.483	20.1143	19.7884			Gm11545	Gm11545	Gm11545	chr11:94755135-94761182	KSR	2i	OK	2.51845	0.600462	-2.06839	4.86848	1.12458e-06	1.87004e-05	yes			L1td1	L1td1	L1td1	chr4:98726753-98738486	KSR	ETP	OK	156.982	183.469	0.224937	-2.76807
											Aipl1	0	0.0532458	0.12084	0	0.19392	0.145295	0.0589945	0.112168	0.0612607			Gm3383	Gm3383	Gm3383	chr14:5791612-5801530	KSR	2i	OK	13.2615	5.29463	-1.32464	4.86835	1.12534e-06	1.87004e-05	yes			Dnttip2	Dnttip2	Dnttip2	chr3:122274413-122285271	KSR	ETP	OK	77.7859	92.0947	0.243609	-2.76501
											Aire	0.430497	0.240849	0.232242	0.395733	0.391519	0.384442	0.952008	0.628467	0.970538			Mir684-1	Mir684-1	Mir684-1	chrX:7753088-7753173	KSR	2i	OK	161.864	271.571	0.746546	-4.86258	1.15865e-06	1.92272e-05	yes			Sav1	Sav1	Sav1	chr12:69746847-69987002	KSR	ETP	OK	17.5036	22.2078	0.343411	-2.7638
											Airn	0.093334	0	0	0	0.119762	0.390525	0.57711	0.399942	0.559112			Klf12	Klf12	Klf12	chr14:99870639-100149796	KSR	2i	OK	1.66702	3.16986	0.927151	-4.86132	1.16608e-06	1.93237e-05	yes			Rfc1	Rfc1	Rfc1	chr5:65261851-65335639	KSR	ETP	OK	34.2604	40.7847	0.251488	-2.76393
											Ajap1	0	0.0349441	0	0.410271	0.63277	0.713828	0.0403599	0.110803	0.167191			Armcx1	Armcx1	Armcx1	chrX:134717937-134721912	KSR	2i	OK	8.75505	13.8091	0.657428	-4.86078	1.16922e-06	1.93488e-05	yes			Iffo1	Iffo1	Iffo1	chr6:125145240-125161782	KSR	ETP	OK	4.35789	6.35941	0.545263	-2.76322
											Ak1	20.1649	20.0213	17.2171	12.9715	13.2307	12.2992	19.252	20.4394	20.1146			Palm	Palm	Palm	chr10:79697304-80369637	KSR	2i	OK	7.46999	12.2831	0.7175	-4.86022	1.17255e-06	1.93771e-05	yes			Polr3k	Polr3k	Polr3k	chr2:181864359-181870826	KSR	ETP	OK	10.6495	13.8217	0.376146	-2.76222
											Ak2	94.4059	103.33	101.835	82.6191	91.9646	91.1258	85.7548	90.2519	89.5982			AA792892	AA792892	AA792892	chr5:94377339-94384334	KSR	2i	OK	5.74986	1.43371	-2.00377	4.85786	1.18661e-06	1.95823e-05	yes			Pdia4	Pdia4	Pdia4	chr6:47796140-47813512	KSR	ETP	OK	74.7372	88.6321	0.246003	-2.76217
											Ak3	4.4158	5.03464	5.35383	8.58013	9.38307	9.49052	9.30519	9.41304	10.6149			Srsf7	Srsf7	Srsf7	chr17:80200079-80207305	KSR	2i	OK	163.629	177.467	0.117119	-4.85554	1.20057e-06	1.97853e-05	yes			Nt5c	Nt5c	Nt5c	chr11:115475676-115491814	KSR	ETP	OK	19.3275	27.2426	0.495209	-2.75966
											Ak4	15.4966	15.9831	16.5905	40.1763	42.4486	43.6633	27.6121	26.5712	25.9451			Crim1	Crim1	Crim1	chr17:78200247-78376592	KSR	2i	OK	2.08476	0.884104	-1.23759	4.85482	1.20499e-06	1.98309e-05	yes			Mbnl1	Mbnl1	Mbnl1	chr3:60472829-60629748	KSR	ETP	OK	2.04621	3.0275	0.565173	-2.75705
											Ak5	0	0.028545	0.032698	0	0.168002	0	0.0324717	0.0905607	0.133424			Lrrfip1	Lrrfip1	Lrrfip1	chr1:90998726-91128944	KSR	2i	OK	7.97717	4.50849	-0.823233	4.85382	1.21105e-06	1.99032e-05	yes			Btbd2	Btbd2	Btbd2	chr10:80642616-80657071	KSR	ETP	OK	8.26645	11.1471	0.431333	-2.75692
											Ak7	5.39812	6.78628	5.97132	3.91669	3.80502	3.14213	5.30231	4.7777	5.54053			Dap	Dap	Dap	chr15:31224384-31274338	KSR	2i	OK	10.2319	4.77919	-1.09823	4.85044	1.23189e-06	2.02179e-05	yes			Mrps36	Mrps36	Mrps36	chr13:100735939-100744659	KSR	ETP	OK	35.2398	45.2592	0.361006	-2.74768
											Ak8	0.39505	0.567668	0.706436	0.262884	0.50224	0.0688873	0.486488	0.40202	0.621688			Jun	Jun	Jun	chr4:95049035-95052222	KSR	2i	OK	4.88916	2.30283	-1.08618	4.85006	1.23427e-06	2.02291e-05	yes			Trpm7	Trpm7	Trpm7	chr2:126791557-126876261	KSR	ETP	OK	18.4935	20.5972	0.15543	-2.74596
											Akap1	33.699	36.8554	35.7915	33.1992	36.672	36.1502	40.8158	38.4082	38.2478			Fam63a	Fam63a	Fam63a	chr3:95282934-95307176	KSR	2i	OK	24.0395	31.0694	0.370087	-4.83761	1.31412e-06	2.15084e-05	yes			Sfmbt1	Sfmbt1	Sfmbt1	chr14:30714848-30822721	KSR	ETP	OK	3.81364	4.78035	0.325947	-2.74396
											Akap10	9.59122	10.2588	9.19058	10.2105	11.3428	12.3315	10.9529	11.0277	11.6582			A230070E04Rik	A230070E04Rik	A230070E04Rik	chr14:68119544-68131371	KSR	2i	OK	1.15668	4.21671	1.86613	-4.83671	1.32003e-06	2.15755e-05	yes			Mga	Mga	Mga	chr2:119897227-119969581	KSR	ETP	OK	10.6033	12.0705	0.186969	-2.74406
											Akap11	7.4099	8.26294	8.09791	10.3909	10.3533	10.981	10.0585	10.8852	10.0031			Tmem39a	Tmem39a	Tmem39a	chr16:38558697-38592162	KSR	2i	OK	39.1862	48.0317	0.293642	-4.83017	1.36414e-06	2.2266e-05	yes			Brix1	Brix1	Brix1	chr15:10474778-10485937	KSR	ETP	OK	66.494	78.733	0.243744	-2.74181
											Akap12	77.6841	79.9664	76.7111	58.3097	68.3048	65.6025	57.8469	61.7585	57.4803			Lamp2	Lamp2	Lamp2	chrX:38405063-38456455	KSR	2i	OK	19.2367	26.7928	0.477985	-4.82659	1.38891e-06	2.26395e-05	yes			Zfp518a	Zfp518a	Zfp518a	chr19:40894704-40917947	KSR	ETP	OK	20.4159	24.4183	0.258273	-2.74102
											Akap13	1.54431	1.84694	1.4816	2.1023	2.30608	1.96882	1.6212	2.18556	1.95383			Stard10	Stard10	Stard10	chr7:101321318-101346312	KSR	2i	OK	6.96067	2.0989	-1.72959	4.82565	1.39548e-06	2.27156e-05	yes			Fkbp11	Fkbp11	Fkbp11	chr15:98724367-98728198	KSR	ETP	OK	22.6702	31.5048	0.474773	-2.74064
											Akap14	0	0	0	0	0	0	0.0557347	0	0			Fhl1	Fhl1	Fhl1	chrX:56731786-56793346	KSR	2i	OK	14.4653	9.09614	-0.669273	4.82469	1.40222e-06	2.27633e-05	yes			Tnrc6a	Tnrc6a	Tnrc6a	chr7:123123884-123195296	KSR	ETP	OK	11.9482	14.4611	0.275386	-2.74053
											Akap17b	1.73066	1.74257	1.52617	1.88384	1.99924	2.13879	1.69628	2.01446	1.4896			Kdm3b	Kdm3b	Kdm3b	chr18:34777007-34839370	KSR	2i	OK	21.6259	27.8494	0.364884	-4.82481	1.40137e-06	2.27633e-05	yes			Ikbkb	Ikbkb	Ikbkb	chr8:22659204-22706583	KSR	ETP	OK	8.5301	10.9418	0.359211	-2.7383
											Akap2	6.94941	8.19896	7.23547	6.00226	6.36898	6.06296	6.78916	7.61885	7.0187			Gm8615	Gm8615	Gm8615	chr5:149119564-149182036	KSR	2i	OK	29.445	40.5809	0.462778	-4.8239	1.4078e-06	2.28228e-05	yes			Ugcg	Ugcg	Ugcg	chr4:59189549-59222833	KSR	ETP	OK	14.8569	18.5142	0.317495	-2.73481
											Akap3	0	0	0.0309907	0.0446832	0.0323115	0	0.031073	0	0			Gm3494	Gm3494	Gm3494	chr14:5516278-5522929	KSR	2i	OK	6.60337	2.82507	-1.22491	4.8208	1.42982e-06	2.31483e-05	yes			Napepld	Napepld	Napepld	chr5:21662902-21701345	KSR	ETP	OK	5.22865	7.15535	0.452585	-2.73357
											Akap4	0	0	0	0	0	0	0	0	0			Ermp1	Ermp1	Ermp1	chr19:29609882-29648420	KSR	2i	OK	29.6461	22.8165	-0.37776	4.81996	1.43585e-06	2.32145e-05	yes			Npat	Npat	Npat	chr9:53537046-53575627	KSR	ETP	OK	10.1742	12.465	0.292964	-2.73152
											Akap5	0.401669	0.358218	0.460149	0.437761	0.462396	0.447646	0.472845	0.315824	0.385585			BC052688	BC052688	BC052688	chr13:61771579-61787282	KSR	2i	OK	14.0355	21.9896	0.647747	-4.81911	1.44203e-06	2.32595e-05	yes			Ina	Ina	Ina	chr19:46886830-47024346	KSR	ETP	OK	4.79472	7.17421	0.581372	-2.72855
											Akap6	0.0103175	0.0232979	0.0171407	0	0.00899151	0	0.0173356	0.0476161	0.00900673			Gcnt1	Gcnt1	Gcnt1	chr19:17326140-17372844	KSR	2i	OK	6.55266	4.00941	-0.708692	4.81904	1.44253e-06	2.32595e-05	yes			Srp19	Srp19	Srp19	chr18:34331144-34336599	KSR	ETP	OK	68.5519	84.7142	0.305409	-2.72712
											Akap7	6.38447	7.69707	6.80911	5.60487	5.30303	5.03522	7.17825	6.08005	7.22215			Lig1	Lig1	Lig1	chr7:13258966-13311427	KSR	2i	OK	99.8853	119.689	0.260948	-4.81517	1.47078e-06	2.36831e-05	yes			B4galnt2	B4galnt2	B4galnt2	chr11:95863558-95914871	KSR	ETP	OK	2.04692	3.10183	0.59966	-2.72637
											Akap8	34.2816	39.0835	35.8625	45.8943	49.9339	48.625	38.1908	38.4667	37.9927			Arl4c	Arl4c	Arl4c	chr1:88698225-88702191	KSR	2i	OK	2.26807	0.777704	-1.54417	4.81226	1.49232e-06	2.39654e-05	yes			Rrbp1	Rrbp1	Rrbp1	chr2:143947394-144011263	KSR	ETP	OK	31.7664	37.4731	0.238356	-2.72628
											Akap8l	12.1976	15.5901	13.7305	12.5795	14.6882	15.765	13.712	15.1112	17.8464			Patz1	Patz1	Patz1	chr11:3202352-3479831	KSR	2i	OK	20.6418	27.117	0.393631	-4.81238	1.49144e-06	2.39654e-05	yes			Zfp871	Zfp871	Zfp871	chr17:32765496-32788287	KSR	ETP	OK	5.64945	6.98632	0.306422	-2.72438
											Akap9	2.237	2.42017	2.23862	2.15666	2.32365	2.3348	2.15033	2.43193	1.97843			Plin2	Plin2	Plin2	chr4:86656564-86670059	KSR	2i	OK	28.2503	19.3875	-0.543143	4.81169	1.4966e-06	2.40019e-05	yes			Gm13889	Gm13889	Gm13889	chr2:93955809-93957100	KSR	ETP	OK	0.775285	2.43607	1.65176	-2.72418
											Akirin1	28.8031	32.8691	28.3104	31.5412	29.9508	33.5123	31.6008	27.156	29.3399			Psg23	Psg23	Psg23	chr7:18606342-18616501	KSR	2i	OK	4.25164	1.5206	-1.48338	4.81089	1.50262e-06	2.40662e-05	yes			Ddx19a	Ddx19a	Ddx19a	chr8:110974990-110997823	KSR	ETP	OK	36.0811	43.7128	0.276815	-2.72252
											Akirin2	43.458	48.5256	46.7073	39.4929	45.5458	45.8451	49.9435	46.942	48.8082			Kcmf1	Kcmf1	Kcmf1	chr6:72841113-72899979	KSR	2i	OK	53.8839	41.6521	-0.371464	4.8087	1.51913e-06	2.4298e-05	yes			Ddx10	Ddx10	Ddx10	chr9:53098453-53248112	KSR	ETP	OK	38.9539	46.5078	0.255702	-2.71848
											Akna	2.79013	2.61111	2.51627	1.82773	2.04218	2.41856	2.24657	3.17641	2.61423			Smpd1	Smpd1	Smpd1	chr7:105554359-105558389	KSR	2i	OK	5.15767	2.21278	-1.22086	4.80459	1.55069e-06	2.47695e-05	yes			Pla2g10	Pla2g10	Pla2g10	chr16:13715061-13739471	KSR	ETP	OK	18.0977	24.7714	0.452869	-2.70755
											Aknad1	0	0	0	0	0	0	0	0	0			Ctbp2	Ctbp2	Ctbp2	chr7:132987010-133123483	KSR	2i	OK	99.1375	78.7688	-0.331807	4.80385	1.55647e-06	2.48287e-05	yes			P2ry2	P2ry2	P2ry2	chr7:100996571-101011991	KSR	ETP	OK	0.803572	1.66855	1.05409	-2.70635
											Akp3	0.0899471	0	0	0.0156762	0	0	0	0	0			Prickle1	Prickle1	Prickle1	chr15:93499113-93595891	KSR	2i	OK	2.49594	0.943634	-1.40328	4.80332	1.56058e-06	2.4861e-05	yes			Ddc	Ddc	Ddc	chr11:11814100-11898144	KSR	ETP	OK	7.26303	10.2691	0.499666	-2.70091
											Akr1a1	184.619	185.13	183.646	158.105	163.719	171.736	182.706	179.456	175.981			Chuk	Chuk	Chuk	chr19:44073333-44107477	KSR	2i	OK	33.8098	27.4541	-0.300415	4.7988	1.5962e-06	2.53947e-05	yes			Arpp19	Arpp19	Arpp19	chr9:75037613-75060313	KSR	ETP	OK	31.2971	34.6726	0.147769	-2.6991
											Akr1b10	8.18627	6.85241	7.07783	6.11969	5.57336	5.28015	6.15928	7.57437	8.24898			Gyg	Gyg	Gyg	chr3:20122083-20155096	KSR	2i	OK	7.18123	3.1174	-1.20389	4.79309	1.64231e-06	2.60589e-05	yes			Bbip1	Bbip1	Bbip1	chr19:53892230-54033278	KSR	ETP	OK	6.89336	9.49235	0.461558	-2.69891
											Akr1b3	308.658	253.151	209.223	327.476	312.074	303.4	272.198	212.26	199.223			Lrrn4	Lrrn4	Lrrn4	chr2:132868515-132880862	KSR	2i	OK	3.52677	1.51976	-1.2145	4.79309	1.64229e-06	2.60589e-05	yes			Mkx	Mkx	Mkx	chr18:6934965-7004779	KSR	ETP	OK	0.684542	1.47908	1.11148	-2.69523
											Akr1b7	0.119837	0.127081	0.0107276	0.0106154	0.00818996	0.00572971	0.00387722	0.00460284	0.0802718			Dmrt1	Dmrt1	Dmrt1	chr19:25505705-25604328	KSR	2i	OK	15.5393	9.83263	-0.660273	4.7893	1.67366e-06	2.65211e-05	yes			Bcl6b	Bcl6b	Bcl6b	chr11:70224126-70229798	KSR	ETP	OK	1.07993	1.95859	0.85888	-2.69352
											Akr1b8	14.6021	14.6906	12.084	10.5047	10.5603	9.97977	18.047	20.6636	17.6273			Dcxr	Dcxr	Dcxr	chr11:120725372-120727281	KSR	2i	OK	17.045	8.24105	-1.04845	4.78073	1.74659e-06	2.76401e-05	yes			H2-K1	H2-K1	H2-K1	chr17:33996011-34000333	KSR	ETP	OK	9.53702	13.2877	0.478477	-2.68983
											Akr1c12	1.20572	0.867903	0.649938	1.20109	1.68298	1.6621	0.979956	0.995834	1.17106			Asph	Asph	Asph	chr4:9269316-9669162	KSR	2i	OK	12.8319	8.78141	-0.547214	4.77866	1.76463e-06	2.78887e-05	yes			Ssx2ip	Ssx2ip	Ssx2ip	chr3:146404641-146440137	KSR	ETP	OK	11.0601	13.6326	0.301693	-2.68879
											Akr1c13	2.23818	2.85803	3.39224	3.00287	3.00433	3.55527	3.37566	2.92668	3.55521			Fkbp3	Fkbp3	Fkbp3	chr12:65036333-65073938	KSR	2i	OK	264.136	330.909	0.325153	-4.77667	1.78225e-06	2.81299e-05	yes			Zfp808	Zfp808	Zfp808	chr13:62129889-62173936	KSR	ETP	OK	21.2457	26.1146	0.297683	-2.68665
											Akr1c14	0.0369645	0.130084	0.0313621	0	0.0986038	0	0.287587	0.205394	0.197216			D16Ertd472e	D16Ertd472e	D16Ertd472e	chr16:78540335-78576688	KSR	2i	OK	8.19504	5.80063	-0.498542	4.77541	1.79344e-06	2.82692e-05	yes			Gtse1	Gtse1	Gtse1	chr15:85859706-85876573	KSR	ETP	OK	80.1653	88.6737	0.145527	-2.68653
											Akr1c18	1.76728	0.943943	1.05137	0.398901	0.288433	0.508449	0.274744	0.382967	0.381543			Sdha	Sdha	Sdha	chr13:74322254-74350240	KSR	2i	OK	84.3125	105.897	0.328847	-4.7708	1.83499e-06	2.8848e-05	yes			Idh3b	Idh3b	Idh3b	chr2:130274411-130284451	KSR	ETP	OK	79.0399	94.5066	0.257834	-2.6815
											Akr1c19	0	0	0	0	0	0	0	0	0			Zfyve26	Zfyve26	Zfyve26	chr12:79232346-79296282	KSR	2i	OK	3.53453	5.25286	0.571585	-4.77091	1.83395e-06	2.8848e-05	yes			Luzp1	Luzp1	Luzp1	chr4:136469760-136549318	KSR	ETP	OK	22.2069	26.2965	0.243864	-2.68088
											Akr1c20	0	0	0	0	0	0	0	0	0			Pola1	Pola1	Pola1	chrX:93304765-93632155	KSR	2i	OK	18.2091	23.9537	0.395589	-4.76451	1.89318e-06	2.97236e-05	yes			Bpnt1	Bpnt1	Bpnt1	chr1:185332158-185357769	KSR	ETP	OK	15.8998	20.3339	0.354884	-2.67888
											Akr1c21	0.0789153	0.115599	0.129257	0	0.129179	0.156123	0.431161	0.464792	0.771103			Smarca1	Smarca1	Smarca1	chrX:47809369-47892552	KSR	2i	OK	5.93605	3.43784	-0.788002	4.76188	1.91799e-06	3.00737e-05	yes			Pdcd4	Pdcd4	Pdcd4	chr19:53892230-54033278	KSR	ETP	OK	15.2056	19.0016	0.321518	-2.67803
											Akr1c6	0	0	0	0	0.0577121	0	0	0	0			Pdcd4	Pdcd4	Pdcd4	chr19:53892230-54033278	KSR	2i	OK	14.9831	9.59245	-0.643368	4.75866	1.94881e-06	3.05168e-05	yes			Calb2	Calb2	Calb2	chr8:110142537-110168206	KSR	ETP	OK	1.96585	3.83316	0.963383	-2.6766
											Akr1cl	0.637271	0.26169	0.327371	0.930228	1.02188	0.941471	0.980708	0.535462	0.857173			Mapkapk2	Mapkapk2	Mapkapk2	chr1:131053703-131097543	KSR	2i	OK	20.1728	13.8155	-0.546122	4.75803	1.95495e-06	3.0573e-05	yes			Hibadh	Hibadh	Hibadh	chr6:52546229-52640300	KSR	ETP	OK	47.1917	57.2565	0.278907	-2.67006
											Akr1d1	0.457338	0.339661	0.299281	0.410705	0.248575	0.44786	0.389564	0.47338	0.521503			Mkrn1	Mkrn1	Mkrn1	chr6:39397820-39420369	KSR	2i	OK	287.076	233.998	-0.294936	4.75469	1.98753e-06	3.10418e-05	yes			Cd37	Cd37	Cd37	chr7:45233631-45238839	KSR	ETP	OK	10.4392	15.0282	0.525669	-2.6689
											Akr1e1	8.66155	7.32666	8.86799	6.44259	6.57159	5.55618	7.16824	7.62987	7.98641			Ddx58	Ddx58	Ddx58	chr4:40203776-40239825	KSR	2i	OK	6.61111	9.79427	0.567047	-4.75089	2.02522e-06	3.15892e-05	yes			Cox7b	Cox7b	Cox7b	chrX:106015699-106022450	KSR	ETP	OK	188.782	221.971	0.233649	-2.6652
											Akr7a5	17.8783	15.9018	17.5961	10.8438	13.8147	11.9786	14.3606	16.744	14.7829			Sms	Sms	Sms	chrX:157443953-157492046	KSR	2i	OK	49.3041	38.2013	-0.368086	4.74828	2.05152e-06	3.19161e-05	yes			Bzw1	Bzw1	Bzw1	chr1:58393135-58406548	KSR	ETP	OK	234.67	271.86	0.212233	-2.66415
											Akt1	11.4118	13.5173	13.5566	14.9138	16.8744	15.5318	16.8441	19.2231	20.3802			Tmcc3	Tmcc3	Tmcc3	chr10:94514856-94590954	KSR	2i	OK	1.41062	0.414756	-1.766	4.74828	2.05151e-06	3.19161e-05	yes			Wrb	Wrb	Wrb	chr16:96145418-96157852	KSR	ETP	OK	23.9006	29.4487	0.301158	-2.66334
											Akt1s1	16.6953	16.246	14.443	13.4001	16.4262	16.0466	14.7631	15.2263	16.1625			Tcf15	Tcf15	Tcf15	chr2:152143608-152149096	KSR	2i	OK	54.8595	36.9015	-0.57206	4.74508	2.08428e-06	3.23836e-05	yes			Prss35	Prss35	Prss35	chr9:86743632-86757506	KSR	ETP	OK	8.06158	10.8778	0.432258	-2.66157
											Akt2	18.8932	21.5735	21.2933	16.5124	16.9396	17.2592	21.6659	20.5922	19.8833			Dnajc10	Dnajc10	Dnajc10	chr2:80315465-80354055	KSR	2i	OK	34.3762	26.3382	-0.384253	4.73803	2.15807e-06	3.34865e-05	yes			Nkain1	Nkain1	Nkain1	chr4:130530130-130574036	KSR	ETP	OK	39.9107	48.0052	0.266417	-2.65934
											Akt3	1.7281	1.7667	2.09859	2.77762	2.77067	2.59507	2.19667	2.69773	2.96614			Txndc12	Txndc12	Txndc12	chr4:108834677-108862119	KSR	2i	OK	44.2821	30.7957	-0.523995	4.73345	2.20737e-06	3.42071e-05	yes			Itpripl1	Itpripl1	Itpripl1	chr2:127138768-127143457	KSR	ETP	OK	2.49532	3.6977	0.567406	-2.65765
											Aktip	14.1195	14.7382	13.9823	12.7973	11.8343	12.4152	12.3524	12.0481	13.2558			Ilf3	Ilf3	Ilf3	chr9:21368002-21411720	KSR	2i	OK	76.2417	85.0089	0.157032	-4.72875	2.25903e-06	3.49624e-05	yes			Tmprss2	Tmprss2	Tmprss2	chr16:97564681-97611195	KSR	ETP	OK	1.10497	2.02007	0.8704	-2.65695
											Alad	19.4385	18.4452	22.7526	14.6584	15.6881	17.6232	22.8915	22.1951	24.6599			Myo1d	Myo1d	Myo1d	chr11:80482126-80780025	KSR	2i	OK	2.6461	1.22947	-1.10583	4.72162	2.33976e-06	3.61648e-05	yes			Ctif	Ctif	Ctif	chr18:75431220-75697696	KSR	ETP	OK	2.37322	3.3304	0.488851	-2.65703
											Alas1	12.9413	12.1199	12.5786	14.8438	17.6766	16.4786	18.1482	18.0634	16.3592			Dusp9	Dusp9	Dusp9	chrX:73639440-73643514	KSR	2i	OK	95.2	75.4537	-0.33537	4.71769	2.38542e-06	3.67281e-05	yes			Ephb3	Ephb3	Ephb3	chr16:21204794-21223304	KSR	ETP	OK	10.4262	13.1897	0.339189	-2.65689
											Alas2	0	0.225214	0.0493588	0.310731	0.192242	0.296622	0.18567	0.185179	0.049366			Nfatc2	Nfatc2	Nfatc2	chr2:168476409-168601655	KSR	2i	OK	2.42111	1.0651	-1.18469	4.71802	2.38151e-06	3.67281e-05	yes			Ccdc137	Ccdc137	Ccdc137	chr11:120458128-120467600	KSR	ETP	OK	6.47927	8.84081	0.448348	-2.65614
											Alb	0	0	0	0	0	0	0	0	0.0494376			Rassf3	Rassf3	Rassf3	chr10:121410350-121476250	KSR	2i	OK	19.7903	14.104	-0.488692	4.71769	2.38539e-06	3.67281e-05	yes			Vegfa	Vegfa	Vegfa	chr17:46016992-46032377	KSR	ETP	OK	21.4179	24.8662	0.215368	-2.65427
											Alcam	0.10554	0.0513192	0.128742	0.135955	0.168153	0.213777	0.200066	0.129296	0.156138			Rap1gap	Rap1gap	Rap1gap	chr4:137664725-137729861	KSR	2i	OK	4.89215	8.15469	0.737163	-4.70678	2.51666e-06	3.86989e-05	yes			Pus3	Pus3	Pus3	chr9:35559465-35570069	KSR	ETP	OK	9.22299	12.4961	0.438168	-2.64419
											Aldh16a1	23.8758	23.9063	24.4328	16.4089	18.2758	16.798	20.7553	23.758	23.6793			Tmem231	Tmem231	Tmem231	chr8:111912017-111933791	KSR	2i	OK	20.697	14.5749	-0.505937	4.70535	2.53425e-06	3.89193e-05	yes			Cmpk1	Cmpk1	Cmpk1	chr4:114960612-114987228	KSR	ETP	OK	49.8048	59.9715	0.267991	-2.64361
											Aldh18a1	24.1907	24.093	25.555	18.5621	19.5677	21.7904	26.6822	29.256	28.1882			Ssx2ip	Ssx2ip	Ssx2ip	chr3:146404641-146440137	KSR	2i	OK	10.911	7.20487	-0.598743	4.70205	2.57559e-06	3.95033e-05	yes			E130309D14Rik	E130309D14Rik	E130309D14Rik	chr11:74619604-74641516	KSR	ETP	OK	2.78521	4.03138	0.533491	-2.63722
											Aldh1a1	0.0509324	0	0.14048	0.0392117	0.0425822	0.0492475	0.183415	0.189796	0.00469439			Abca3	Abca3	Abca3	chr17:24352045-24414513	KSR	2i	OK	3.75131	2.20679	-0.765444	4.69991	2.60281e-06	3.98697e-05	yes			Cdk8	Cdk8	Cdk8	chr5:146231674-146302874	KSR	ETP	OK	27.6441	33.7315	0.287129	-2.63473
											Aldh1a2	0.353985	0.749208	0.633001	0.34738	0.381054	0.433236	1.09066	1.23913	1.17478			Cd24a	Cd24a	Cd24a	chr10:43579168-43584265	KSR	2i	OK	14.5149	22.044	0.602849	-4.69844	2.62151e-06	4.00966e-05	yes			Tsn	Tsn	Tsn	chr1:118298517-118311132	KSR	ETP	OK	51.6039	60.8766	0.238407	-2.62955
											Aldh1a3	0.116908	0.0877746	0.145535	0.146271	0.174851	0.0296458	0.192606	0.109834	0.152754			St8sia6	St8sia6	St8sia6	chr2:13654935-13793520	KSR	2i	OK	6.29447	3.44414	-0.869941	4.69822	2.62433e-06	4.00966e-05	yes			Tmed7	Tmed7	Tmed7	chr18:46585927-46597535	KSR	ETP	OK	30.7822	36.8974	0.261422	-2.6291
											Aldh1a7	0.0475112	0	0.0071986	0.148582	0.0395799	0	0.0714727	0.0718181	0.197961			Adrb3	Adrb3	Adrb3	chr8:27225775-27229588	KSR	2i	OK	7.26712	11.7401	0.691992	-4.697	2.64006e-06	4.02854e-05	yes			Mrpl36	Mrpl36	Mrpl36	chr13:73331008-73332178	KSR	ETP	OK	43.5515	55.3136	0.344912	-2.62529
											Aldh1b1	2.64383	2.90421	2.57699	0.748509	0.542962	0.560578	1.49245	1.18076	1.461			Gm3317	Gm3317	Gm3317	chr14:5163641-5170292	KSR	2i	OK	6.37777	2.77117	-1.20256	4.69535	2.66151e-06	4.05608e-05	yes			Txndc11	Txndc11	Txndc11	chr16:11066297-11134532	KSR	ETP	OK	6.34966	8.768	0.465568	-2.62427
											Aldh1l1	3.64833	3.45282	3.34661	3.08364	3.46112	2.04171	3.00913	2.70713	3.24376			Rpl36a	Rpl36a	Rpl36a	chrX:134585653-134588062	KSR	2i	OK	892.696	1099.18	0.300187	-4.69294	2.69313e-06	4.09905e-05	yes			Strap	Strap	Strap	chr6:137735081-137751930	KSR	ETP	OK	129.146	150.23	0.218171	-2.62441
											Aldh1l2	1.47869	1.36984	1.63752	0.957964	1.22263	1.34533	1.4125	1.46618	1.6439			Gsta3	Gsta3	Gsta3	chr1:21240588-21265559	KSR	2i	OK	6.79595	12.8416	0.91808	-4.69189	2.70699e-06	4.11489e-05	yes			Skp2	Skp2	Skp2	chr15:9111984-9140451	KSR	ETP	OK	22.598	27.5464	0.285672	-2.62116
											Aldh2	95.2549	88.6173	94.2112	63.559	73.476	78.2322	87.3745	93.5453	91.0829			Tbx3	Tbx3	Tbx3	chr5:119670668-119684601	KSR	2i	OK	54.8327	48.6469	-0.172689	4.69025	2.72865e-06	4.14255e-05	yes			Pbld1	Pbld1	Pbld1	chr10:63061616-63077536	KSR	ETP	OK	16.1035	20.6916	0.36167	-2.61674
											Aldh3a1	0.921837	0.925107	1.243	0.359831	0.495707	0.68615	0.76113	0.948303	0.852574			Kirrel	Kirrel	Kirrel	chr3:87078591-87174747	KSR	2i	OK	8.12274	5.9454	-0.450192	4.68733	2.76788e-06	4.19678e-05	yes			Etv4	Etv4	Etv4	chr11:101769741-101785310	KSR	ETP	OK	74.6992	88.1369	0.238653	-2.61577
											Aldh3a2	9.72853	11.8904	11.9244	9.41666	10.9208	10.3752	12.4853	13.1205	12.684			Itgb1	Itgb1	Itgb1	chr8:128685653-128733579	KSR	2i	OK	54.0344	42.6643	-0.340847	4.68697	2.77274e-06	4.19883e-05	yes			Emg1	Emg1	Emg1	chr6:124663103-124712178	KSR	ETP	OK	179.589	210.783	0.231053	-2.61263
											Aldh3b1	0.252593	0.266263	0.540076	0	0.290878	0.121769	0.0983489	0.272825	0.412817			Snrpe	Snrpe	Snrpe	chr1:133603870-133610280	KSR	2i	OK	318.145	404.459	0.346308	-4.68499	2.79976e-06	4.23436e-05	yes			Hsd17b7	Hsd17b7	Hsd17b7	chr1:169949536-169969205	KSR	ETP	OK	5.70826	7.49006	0.391927	-2.6103
											Aldh3b2	0.0574946	0	0.199847	0	0.141724	0.0540953	0.133089	0.199247	0.0989415			Cyp2c55	Cyp2c55	Cyp2c55	chr19:39007018-39042687	KSR	2i	OK	2.67727	0.513719	-2.38171	4.67739	2.90551e-06	4.38349e-05	yes			Xylb	Xylb	Xylb	chr9:119357380-119393797	KSR	ETP	OK	4.48512	6.09394	0.442228	-2.60963
											Aldh4a1	15.0133	15.0624	14.3078	14.9202	16.9321	15.2982	16.1213	17.2286	16.1607			Pdgfa	Pdgfa	Pdgfa	chr5:138976971-138994953	KSR	2i	OK	20.8838	33.2585	0.671338	-4.67738	2.90569e-06	4.38349e-05	yes			Nrbp2	Nrbp2	Nrbp2	chr15:76085593-76090013	KSR	ETP	OK	2.06339	3.41565	0.727139	-2.60803
											Aldh5a1	1.76355	2.48427	2.34002	1.62029	2.17968	2.06502	1.98524	2.0073	2.04543			Rb1	Rb1	Rb1	chr14:73195501-73325791	KSR	2i	OK	5.11878	2.98782	-0.776705	4.67491	2.94089e-06	4.43099e-05	yes			Kcnn4	Kcnn4	Kcnn4	chr7:24370262-24385212	KSR	ETP	OK	0.622567	1.67791	1.43037	-2.60642
											Aldh6a1	6.93751	8.30737	7.61856	5.72809	6.99248	6.88938	7.36567	6.49851	7.35733			Bop1	Bop1	Bop1	chr15:76380512-76477269	KSR	2i	OK	78.634	61.4277	-0.356264	4.67022	3.00873e-06	4.52749e-05	yes			Tbccd1	Tbccd1	Tbccd1	chr16:22813214-22857569	KSR	ETP	OK	8.67054	11.467	0.403296	-2.60608
											Aldh7a1	21.4411	23.1134	23.6516	18.2584	18.0371	19.3019	23.5032	23.4716	25.4209			Pdzd3	Pdzd3	Pdzd3	chr9:44247311-44251464	KSR	2i	OK	2.6752	0.30144	-3.1497	4.66745	3.04961e-06	4.58324e-05	yes			Zfhx2	Zfhx2	Zfhx2	chr14:55061658-55092048	KSR	ETP	OK	6.42769	7.99055	0.313994	-2.6012
											Aldh8a1	0	0.0341114	0	0	0.0777474	0	0	0	0			Celf1	Celf1	Celf1	chr2:90940396-91019497	KSR	2i	OK	58.4489	65.0499	0.154371	-4.6614	3.14071e-06	4.71423e-05	yes			Zc3h18	Zc3h18	Zc3h18	chr8:122376615-122417360	KSR	ETP	OK	37.3273	40.9812	0.13473	-2.6012
											Aldh9a1	27.2716	29.3884	29.1134	28.0137	26.7487	29.4393	28.1973	28.8623	29.2202			Prss8	Prss8	Prss8	chr7:127912516-127930113	KSR	2i	OK	3.80149	1.059	-1.84386	4.65743	3.20187e-06	4.79999e-05	yes			Prr11	Prr11	Prr11	chr11:87089155-87108714	KSR	ETP	OK	10.6469	13.3919	0.330933	-2.60091
											Aldoa	521.884	505.798	519.774	314.996	351.594	337.864	420.359	445.624	437.993			4933426M11Rik	4933426M11Rik	4933426M11Rik	chr12:80790531-80880833	KSR	2i	OK	16.5927	12.6019	-0.396906	4.65648	3.21656e-06	4.81597e-05	yes			Tprn	Tprn	Tprn	chr2:25262597-25269886	KSR	ETP	OK	7.30782	9.83455	0.428419	-2.60054
											Aldoart1	26.3392	30.239	29.2734	17.5762	21.0099	18.7552	25.9706	22.913	27.2271			Rhobtb1	Rhobtb1	Rhobtb1	chr10:69208551-69291784	KSR	2i	OK	2.9578	1.36102	-1.11984	4.65035	3.31368e-06	4.95518e-05	yes			Gmps	Gmps	Gmps	chr3:63976142-64019078	KSR	ETP	OK	25.7974	30.6605	0.24916	-2.59973
											Aldoart2	11.1508	12.0738	14.9466	7.10245	7.34603	6.0713	11.2524	8.92997	8.21479			Dock7	Dock7	Dock7	chr4:98936664-99120915	KSR	2i	OK	4.87944	7.12031	0.545225	-4.64715	3.36548e-06	5.02634e-05	yes			Impa1	Impa1	Impa1	chr3:10313539-10331439	KSR	ETP	OK	35.9452	43.1595	0.263881	-2.59928
											Aldob	0	0.0833384	0	0	0	0.0554339	0	0	0.0946339			Tjp1	Tjp1	Tjp1	chr7:65296164-65371244	KSR	2i	OK	24.65	19.7682	-0.318407	4.64001	3.484e-06	5.19686e-05	yes			Eif5b	Eif5b	Eif5b	chr1:37998009-38129662	KSR	ETP	OK	34.0694	39.7371	0.222011	-2.59726
											Aldoc	1.01257	1.55993	1.3581	0.879379	1.66739	1.74025	1.8058	1.26597	1.33678			Fam176a	Fam176a	Fam176a	chr6:82041627-82093099	KSR	2i	OK	4.57082	1.48787	-1.61921	4.63694	3.53597e-06	5.2678e-05	yes			Hoxd13	Hoxd13	Hoxd13	chr2:74668309-74671598	KSR	ETP	OK	1.21752	2.3305	0.936696	-2.59671
											Alg1	8.62867	8.21098	7.35564	9.86962	9.48124	9.89702	8.68967	9.45901	8.42263			Rhox9	Rhox9	Rhox9	chrX:37899096-37901770	KSR	2i	OK	5.96092	0.877487	-2.76408	4.63532	3.56387e-06	5.30276e-05	yes			Sh3bgrl	Sh3bgrl	Sh3bgrl	chrX:109095406-109162467	KSR	ETP	OK	7.54333	10.0304	0.41111	-2.59652
											Alg10b	10.3916	11.8651	10.0012	11.1058	10.4007	10.8596	9.19655	10.1981	10.2871			Tlr2	Tlr2	Tlr2	chr3:83836271-83841608	KSR	2i	OK	6.89337	11.0526	0.681105	-4.62857	3.68195e-06	5.4711e-05	yes			Dcun1d1	Dcun1d1	Dcun1d1	chr3:35892104-35932966	KSR	ETP	OK	5.76235	7.29601	0.340451	-2.59482
											Alg11	5.51831	5.97293	5.41193	6.86362	6.20502	6.29685	6.11294	5.7077	6.31235			Trio	Trio	Trio	chr15:27730648-28025848	KSR	2i	OK	1.9783	1.12764	-0.810954	4.62834	3.68617e-06	5.4711e-05	yes			Hnrnpa3	Hnrnpa3	Hnrnpa3	chr2:75659258-75669407	KSR	ETP	OK	58.2532	67.4965	0.212475	-2.59394
											Alg12	3.50006	3.60389	4.18434	5.12324	4.66953	4.45686	3.2779	3.93378	4.22489			Lgals9	Lgals9	Lgals9	chr11:78962978-78984924	KSR	2i	OK	8.64616	4.0382	-1.09835	4.62698	3.71031e-06	5.5001e-05	yes			Rac1	Rac1	Rac1	chr5:143505480-143527993	KSR	ETP	OK	87.1019	102.205	0.230696	-2.59024
											Alg13	60.4468	68.2829	57.9366	26.1961	27.0755	28.1455	41.7081	39.1358	35.8781			Npnt	Npnt	Npnt	chr3:132882695-132950291	KSR	2i	OK	2.37135	0.831727	-1.51152	4.62563	3.73457e-06	5.5292e-05	yes			Fam184a	Fam184a	Fam184a	chr10:53633144-53750909	KSR	ETP	OK	1.24732	2.0744	0.733869	-2.58809
											Alg14	12.884	13.0709	10.918	9.13413	9.96897	8.6559	10.4525	11.4067	10.7425			Ptk7	Ptk7	Ptk7	chr17:46564450-46629504	KSR	2i	OK	31.2354	23.9466	-0.383362	4.62446	3.75567e-06	5.55356e-05	yes			St8sia6	St8sia6	St8sia6	chr2:13654935-13793520	KSR	ETP	OK	6.37988	8.54458	0.421479	-2.58707
											Alg2	10.5029	11.2549	11.3902	9.214	8.44225	12.0916	10.436	10.668	9.88684			Sgce	Sgce	Sgce	chr6:4674349-4747204	KSR	2i	OK	5.40544	2.01774	-1.42167	4.62412	3.76188e-06	5.55586e-05	yes			Tprkb	Tprkb	Tprkb	chr6:85915718-85930284	KSR	ETP	OK	17.7609	22.1156	0.31636	-2.58648
											Alg3	17.2502	15.9351	15.6382	12.6718	12.0318	10.5636	14.1665	14.1119	15.515			Cpd	Cpd	Cpd	chr11:76777207-76847008	KSR	2i	OK	3.336	2.08766	-0.676235	4.62352	3.77274e-06	5.56502e-05	yes			Fbxo30	Fbxo30	Fbxo30	chr10:11281329-11297969	KSR	ETP	OK	12.8608	15.3079	0.251293	-2.58573
											Alg5	10.8329	12.0068	12.4304	20.4562	15.5219	21.1325	15.8969	14.0527	12.4825			4930470H14Rik	4930470H14Rik	4930470H14Rik	chr17:4044657-4082995	KSR	2i	OK	166.133	132.864	-0.322394	4.61535	3.92429e-06	5.78143e-05	yes			Adcy1	Adcy1	Adcy1	chr11:7063488-7178505	KSR	ETP	OK	0.963678	1.37027	0.507841	-2.58339
											Alg6	9.4472	10.7508	10.3842	11.1954	8.97287	10.1807	8.69327	9.16133	9.1921			Bend7	Bend7	Bend7	chr2:4717830-4802146	KSR	2i	OK	0.83316	2.32012	1.47754	-4.60852	4.05545e-06	5.9673e-05	yes			2900011O08Rik	2900011O08Rik	2900011O08Rik	chr16:13986636-14101494	KSR	ETP	OK	7.62121	10.3013	0.434727	-2.58174
											Alg8	3.81425	3.68536	3.80889	4.60114	5.78101	5.18619	5.0347	4.39575	4.50214			Parp12	Parp12	Parp12	chr6:39086411-39118349	KSR	2i	OK	12.4094	8.2342	-0.591728	4.60734	4.07854e-06	5.99389e-05	yes			9630033F20Rik	9630033F20Rik	9630033F20Rik	chr6:127085115-127109552	KSR	ETP	OK	25.0616	30.0959	0.264092	-2.58105
											Alg9	7.8059	8.43685	7.62668	9.6774	9.64875	9.85484	8.96703	9.04433	8.50128			Cdh3	Cdh3	Cdh3	chr8:106510890-106556908	KSR	2i	OK	5.84669	3.17775	-0.879616	4.6064	4.097e-06	6.01363e-05	yes			Cul1	Cul1	Cul1	chr6:47454323-47526139	KSR	ETP	OK	70.6975	82.6056	0.22458	-2.5785
											Alk	0.0935481	0.100838	0.0386794	0.170915	0.183481	0.0911706	0.0568337	0.207731	0.139223			Itm2a	Itm2a	Itm2a	chrX:107397194-107403360	KSR	2i	OK	10.0958	5.26436	-0.93942	4.60113	4.20213e-06	6.16037e-05	yes			Prpf3	Prpf3	Prpf3	chr3:95830621-95855753	KSR	ETP	OK	31.9395	38.4551	0.267834	-2.57743
											Alkbh1	12.2045	14.7931	13.0342	12.4496	12.1794	13.1283	12.3947	12.382	12.3494			Mapk8ip2	Mapk8ip2	Mapk8ip2	chr15:89453910-89462447	KSR	2i	OK	1.08613	2.77312	1.35231	-4.59979	4.22923e-06	6.19251e-05	yes			Gjb5	Gjb5	Gjb5	chr4:127354808-127358164	KSR	ETP	OK	25.2241	31.6308	0.32653	-2.57712
											Alkbh2	17.6689	13.8597	15.5025	11.0116	10.9703	11.496	13.9434	11.925	15.4366			Dyrk3	Dyrk3	Dyrk3	chr1:131128440-131138234	KSR	2i	OK	39.1933	28.6684	-0.451147	4.59785	4.2687e-06	6.24265e-05	yes			Atox1	Atox1	Atox1	chr11:55446642-55461138	KSR	ETP	OK	223.481	267.769	0.26084	-2.57637
											Alkbh3	7.85919	7.11291	7.89552	7.36387	8.04423	7.14571	8.75885	8.04975	8.11133			Gm949	Gm949	Gm949	chr18:46921814-46934222	KSR	2i	OK	24.5448	33.4833	0.448021	-4.59327	4.36361e-06	6.37365e-05	yes			Rsbn1	Rsbn1	Rsbn1	chr3:103914119-104007491	KSR	ETP	OK	2.57717	3.50671	0.444328	-2.57583
											Alkbh4	6.74862	6.33825	5.52769	4.69917	4.75613	5.66549	4.87915	5.6997	4.78704			Dtx1	Dtx1	Dtx1	chr5:120680263-120711669	KSR	2i	OK	1.45006	3.28727	1.18078	-4.58531	4.53305e-06	6.61305e-05	yes			Gm20605	Gm20605,Lrch4	Gm20605,Lrch4	chr5:137629122-137642902	KSR	ETP	OK	2.0345	3.97348	0.96573	-2.57471
											Alkbh5	13.5997	14.422	14.55	14.6646	15.5363	15.7256	15.217	15.0005	14.4422			Cdca7l	Cdca7l	Cdca7l	chr12:117843860-118199043	KSR	2i	OK	8.54041	4.91439	-0.797293	4.58005	4.64875e-06	6.77357e-05	yes			Srek1ip1	Srek1ip1	Srek1ip1	chr13:104817238-104838659	KSR	ETP	OK	5.60804	8.16324	0.541645	-2.57379
											Alkbh6	15.412	16.1505	12.773	11.3139	16.961	13.1513	13.3869	15.599	16.385			Car2	Car2	Car2	chr3:14886425-14900770	KSR	2i	OK	65.7798	50.095	-0.392979	4.57345	4.79764e-06	6.982e-05	yes			Hoxa5	Hoxa5	Hoxa5	chr6:52169061-52213597	KSR	ETP	OK	0.79562	1.96125	1.30162	-2.57242
											Alkbh7	17.3591	17.2401	15.4271	12.2794	11.4482	11.7851	12.2888	13.0108	13.9476			Arl4d	Arl4d	Arl4d	chr11:101665540-101667832	KSR	2i	OK	17.3778	10.3466	-0.748089	4.57219	4.8265e-06	7.01546e-05	yes			Znrd1	Znrd1	Znrd1	chr17:36954357-36958428	KSR	ETP	OK	83.8318	102.791	0.294147	-2.56849
											Alkbh8	4.34368	5.64599	4.76696	6.21977	6.38167	5.64862	5.63199	5.08568	4.87449			Rbm47	Rbm47	Rbm47	chr5:66016556-66151924	KSR	2i	OK	5.11934	3.06572	-0.739734	4.57129	4.84726e-06	7.03707e-05	yes			Mtap9	Mtap9	Mtap9	chr3:82358071-82395268	KSR	ETP	OK	2.22974	3.10366	0.477091	-2.56782
											Allc	0	0	0.0540998	0	0	0	0.0528961	0	0.0568094			Polr1c	Polr1c	Polr1c	chr17:46243919-46248045	KSR	2i	OK	135.263	105.931	-0.352649	4.57035	4.86916e-06	7.05862e-05	yes			Timm8b	Timm8b	Timm8b	chr9:50603900-50625000	KSR	ETP	OK	97.8519	120.91	0.305267	-2.5645
											Alms1	3.60333	4.21939	3.95682	4.30545	4.73201	4.72383	4.10811	4.33903	3.63024			Ston2	Ston2	Ston2	chr12:91633008-91786436	KSR	2i	OK	4.65513	3.18816	-0.546096	4.57014	4.87392e-06	7.05862e-05	yes			Taf9	Taf9	Taf9	chr13:100651342-100666413	KSR	ETP	OK	161.795	182.74	0.175618	-2.56435
											Alms1-ps2	1.52781	1.27584	1.34458	1.11212	1.06817	1.42817	1.66285	1.40765	1.21618			Pik3c2a	Pik3c2a	Pik3c2a	chr7:116337275-116443458	KSR	2i	OK	7.59075	5.41157	-0.488194	4.56722	4.94235e-06	7.14905e-05	yes			Chrna9	Chrna9	Chrna9	chr5:65967123-65977486	KSR	ETP	OK	5.31094	7.6613	0.528624	-2.56406
											Alox12	1.05462	1.75562	1.57663	0.800542	1.08672	0.986097	1.93797	1.92461	1.844			Pga5	Pga5	Pga5	chr19:10668956-10678071	KSR	2i	OK	4.77653	1.33862	-1.83521	4.55531	5.23089e-06	7.55727e-05	yes			Gm11974	Gm11974	Gm11974	chr11:6525590-6528760	KSR	ETP	OK	26.6987	36.3563	0.445437	-2.56194
											Alox12b	0.0532113	0	0.130016	0.0606217	0.0847397	0	0.0831213	0.188451	0.0425054			Gm6793	Gm6793	Gm6793	chr2:75659258-75669407	KSR	2i	OK	763.847	930.659	0.28497	-4.55501	5.23834e-06	7.5589e-05	yes			Ing1	Ing1	Ing1	chr8:11556065-11563250	KSR	ETP	OK	33.0317	39.7118	0.265714	-2.56179
											Alox12e	0.146326	0.0349546	0.0803418	0.057988	0.0405773	0	0.117408	0.0708666	0.0822515			A430078G23Rik	A430078G23Rik	A430078G23Rik	chr8:3353414-3390299	KSR	2i	OK	2.71595	0.966502	-1.49061	4.55262	5.29829e-06	7.63618e-05	yes			Etaa1	Etaa1	Etaa1	chr11:17938748-17953875	KSR	ETP	OK	16.4714	20.0353	0.282579	-2.56133
											Alox15	0.211781	0.226631	0.174086	0.122841	0.043265	0.049153	0.163114	0.225402	0.477146			Kctd1	Kctd1	Kctd1	chr18:14968684-15151446	KSR	2i	OK	3.5655	1.21055	-1.55845	4.5522	5.30873e-06	7.64201e-05	yes			Zmym1	Zmym1	Zmym1	chr4:127047093-127061132	KSR	ETP	OK	30.0198	35.6675	0.248696	-2.56071
											Alox5	0.291075	0.270511	0.316138	0.618368	0.324394	0.540366	1.15423	1.01765	1.04037			Sec14l1	Sec14l1	Sec14l1	chr11:117115171-117159268	KSR	2i	OK	27.0557	33.855	0.323438	-4.54595	5.46873e-06	7.86286e-05	yes			Tmem70	Tmem70	Tmem70	chr1:16665190-16678275	KSR	ETP	OK	18.2106	23.183	0.348288	-2.55959
											Alox5ap	0.931325	1.66746	1.52675	1.06632	2.58575	1.53704	1.80127	1.77702	1.88615			Pet2	Pet2	Pet2	chrX:89403847-89409689	KSR	2i	OK	3.11855	1.50013	-1.05579	4.53781	5.68418e-06	8.16281e-05	yes			Slc9a3r1	Slc9a3r1	Slc9a3r1	chr11:115163340-115181178	KSR	ETP	OK	43.8205	52.9489	0.272993	-2.55821
											Alox8	0.471819	0.33052	0.282518	0.677895	0.419931	0.143931	0.714972	0.695984	0.581969			Slc30a1	Slc30a1	Slc30a1	chr1:191894071-191913247	KSR	2i	OK	7.88787	5.30828	-0.571391	4.53565	5.74254e-06	8.23673e-05	yes			Csnk2b	Csnk2b	Csnk2b	chr17:35116194-35121447	KSR	ETP	OK	113.941	135.085	0.245578	-2.55777
											Aloxe3	0.10647	0.074356	0.0866227	0	0.219137	0.148382	0.042399	0.269501	0.353471			Esx1	Esx1	Esx1	chrX:137115396-137120326	KSR	2i	OK	4.03286	1.07335	-1.90968	4.53496	5.76156e-06	8.25408e-05	yes			Ankrd12	Ankrd12	Ankrd12	chr17:65967500-66077046	KSR	ETP	OK	1.69873	2.33852	0.461137	-2.55461
											Alpi	0	0	0	0.00752805	0	0	0	0.000739248	0			Lrrc1	Lrrc1	Lrrc1	chr9:77430822-77544852	KSR	2i	OK	8.83339	5.40049	-0.709877	4.5345	5.77412e-06	8.26218e-05	yes			Ssr2	Ssr2	Ssr2	chr3:88579670-88588413	KSR	ETP	OK	229.241	266.401	0.216738	-2.54869
											Alpk1	0	0.0466242	0.0537552	0.1522	0.12586	0.0207282	0.0890194	0.162678	0.0715157			Gm1995	Gm1995	Gm1995	chr12:87861349-87865690	KSR	2i	OK	2.20551	0.873464	-1.33629	4.53113	5.867e-06	8.38376e-05	yes			Fam165b	Fam165b	Fam165b	chr16:92301302-92313041	KSR	ETP	OK	16.492	24.3017	0.559286	-2.54788
											Alpk2	0	0.010769	0	0	0	0.0144428	0	0.0230604	0			Nol11	Nol11	Nol11	chr11:107166660-107189381	KSR	2i	OK	57.9146	50.1979	-0.206299	4.53091	5.87312e-06	8.38376e-05	yes			Dmgdh	Dmgdh	Dmgdh	chr13:93674435-93752823	KSR	ETP	OK	1.70503	2.79868	0.71495	-2.54755
											Alpk3	2.40882	2.21002	2.26856	0.791359	0.873005	0.792732	1.4953	1.75998	1.66272			Dido1	Dido1	Dido1	chr2:180657963-180709999	KSR	2i	OK	18.9959	15.0695	-0.334054	4.53	5.89828e-06	8.40962e-05	yes			Trim11	Trim11	Trim11	chr11:58978115-58991458	KSR	ETP	OK	8.83538	11.8717	0.426167	-2.547
											Alpl	83.1309	83.6093	87.3615	43.883	51.0927	49.6416	53.4659	58.338	57.309			Idh2	Idh2	Idh2	chr7:80094846-80115350	KSR	2i	OK	90.1218	114.1	0.340353	-4.52944	5.91396e-06	8.42193e-05	yes			Cbll1	Cbll1	Cbll1	chr12:31484828-31499616	KSR	ETP	OK	10.6858	12.8235	0.263096	-2.54651
											Alppl2	0	0.0425645	0.156226	0.208613	0.152159	0.0567435	1.65938	1.10779	1.27244			Cln8	Cln8	Cln8	chr8:14888535-14901719	KSR	2i	OK	7.88598	5.50808	-0.517741	4.52791	5.95699e-06	8.46338e-05	yes			Zfyve28	Zfyve28	Zfyve28	chr5:34194893-34288324	KSR	ETP	OK	2.55332	3.69305	0.532438	-2.54539
											Als2	16.7643	20.0651	17.5688	18.3286	17.771	18.9686	18.7607	21.2045	19.9761			Foxp4	Foxp4	Foxp4	chr17:47867132-47924632	KSR	2i	OK	21.3982	26.4827	0.307561	-4.5279	5.95724e-06	8.46338e-05	yes			Crim1	Crim1	Crim1	chr17:78200247-78376592	KSR	ETP	OK	2.11551	2.98985	0.499068	-2.54083
											Als2cl	4.22237	4.39902	4.88399	3.56685	4.23714	3.83673	3.66616	3.69635	4.06683			Plat	Plat	Plat	chr8:22757743-22782848	KSR	2i	OK	2.04907	0.261829	-2.96827	4.52615	6.00685e-06	8.52374e-05	yes			Sec22c	Sec22c	Sec22c	chr9:121680044-121705029	KSR	ETP	OK	3.04835	4.0297	0.402643	-2.54023
											Als2cr11	0.731911	0.891523	0.638974	0.552769	0.58767	0.607735	0.951426	1.2064	1.15959			1700011F14Rik	1700011F14Rik	1700011F14Rik	chr19:58512001-58553085	KSR	2i	OK	7.61482	2.77759	-1.45498	4.52	6.18389e-06	8.76454e-05	yes			Mtap6	Mtap6	Mtap6	chr7:99267446-99337137	KSR	ETP	OK	3.67358	5.41132	0.558795	-2.53874
											Als2cr12	0	0	0	0	0.0543472	0	0.109724	0.0529037	0			Celsr1	Celsr1	Celsr1	chr15:85898757-86033777	KSR	2i	OK	3.44282	4.94404	0.522099	-4.51698	6.27265e-06	8.87982e-05	yes			Zfp42	Zfp42	Zfp42	chr8:43295066-43307009	KSR	ETP	OK	361.539	416.137	0.202908	-2.53719
											Als2cr4	9.12492	9.5278	8.98448	8.96923	10.4385	10.196	8.2061	7.43338	8.12728			Camk1d	Camk1d	Camk1d	chr2:5293456-5714664	KSR	2i	OK	5.38012	7.62681	0.503443	-4.51209	6.41934e-06	9.07672e-05	yes			Cfl1	Cfl1	Cfl1	chr19:5490454-5494031	KSR	ETP	OK	916.615	1057.26	0.20594	-2.53667
											Alx1	0.0486003	0	0.0836754	0.116673	0.124342	0.10201	0.123306	0.113836	0.0855051			Lypla1	Lypla1	Lypla1	chr1:4807892-4846735	KSR	2i	OK	43.6096	56.2258	0.366585	-4.5103	6.47362e-06	9.14265e-05	yes			Penk	Penk	Penk	chr4:4133535-4138445	KSR	ETP	OK	2.57994	4.52683	0.811166	-2.53485
											Alx3	0.13398	0	0	0.0792045	0.267501	0.0633348	0	0.147818	0			Lima1	Lima1	Lima1	chr15:99778467-99875456	KSR	2i	OK	11.8288	15.8946	0.426227	-4.50882	6.519e-06	9.19587e-05	yes			Mtdh	Mtdh	Mtdh	chr15:34082718-34142385	KSR	ETP	OK	52.4514	61.3923	0.227075	-2.535
											Alx4	0.0613903	0.0590278	4.78814e-05	0.475482	0.305719	0.318598	0.130264	0.129788	1.32027e-05			Adam19	Adam19	Adam19	chr11:46055986-46147342	KSR	2i	OK	5.59562	8.02316	0.519873	-4.50661	6.58707e-06	9.28093e-05	yes			Gtf2h2	Gtf2h2	Gtf2h2	chr13:100468576-100492609	KSR	ETP	OK	22.7295	28.4717	0.324959	-2.5344
											Alyref	81.4265	73.7395	81.7709	77.5808	73.9465	82.4333	73.8283	66.4843	78.9302			Gm12070	Gm12070	Gm12070	chr11:26785107-26787859	KSR	2i	OK	751.292	912.378	0.280258	-4.50625	6.59835e-06	9.28588e-05	yes			Tap1	Tap1	Tap1	chr17:34187555-34197225	KSR	ETP	OK	5.03959	6.95312	0.464353	-2.53347
											Alyref2	1.95704	1.53862	1.7529	1.68686	1.59846	2.02732	1.67998	2.1557	2.4684			Cdc20	Cdc20	Cdc20	chr4:118428092-118437343	KSR	2i	OK	157.868	126.929	-0.314704	4.50524	6.62971e-06	9.29716e-05	yes			B3galnt1	B3galnt1	B3galnt1	chr3:69574185-69598861	KSR	ETP	OK	9.53703	12.7825	0.422553	-2.53289
											Amac1	0.23278	0.219008	0.131133	0.195453	0.194464	0.393061	0.239488	0.115367	0.12993			Cr1l	Cr1l	Cr1l	chr1:195103787-195131570	KSR	2i	OK	18.5849	11.8823	-0.645316	4.50536	6.62597e-06	9.29716e-05	yes			Ccdc18	Ccdc18	Ccdc18	chr5:108132913-108232949	KSR	ETP	OK	4.81815	6.33514	0.394897	-2.53314
											Amacr	3.81958	4.56346	4.82714	3.52377	4.37642	4.98702	4.97437	4.55631	3.88381			Scarb2	Scarb2	Scarb2	chr5:92443872-92505608	KSR	2i	OK	20.1354	13.6497	-0.560865	4.50568	6.61615e-06	9.29716e-05	yes			Lrrc59	Lrrc59	Lrrc59	chr11:94629823-94653754	KSR	ETP	OK	130.45	150.819	0.209316	-2.53303
											Ambn	0	0	0	0	0	0	0	0	0			Coro1b	Coro1b	Coro1b	chr19:4148662-4154035	KSR	2i	OK	60.9433	78.4987	0.365201	-4.50176	6.73922e-06	9.43965e-05	yes			Mesdc2	Mesdc2	Mesdc2	chr7:83891999-83901532	KSR	ETP	OK	28.6576	33.8225	0.239066	-2.53087
											Ambp	0	0	0	0	0.073236	0	0.130896	0	0.071449			Cd97	Cd97	Cd97	chr8:83715176-83741311	KSR	2i	OK	26.6059	32.8687	0.304967	-4.5013	6.75404e-06	9.44879e-05	yes			Mrpl41	Mrpl41	Mrpl41	chr2:24962421-24975098	KSR	ETP	OK	9.97045	12.9604	0.378375	-2.52989
											Ambra1	8.94743	9.64136	10.3988	10.0491	11.1305	10.8929	10.257	11.6133	10.5375			Rcbtb2	Rcbtb2	Rcbtb2	chr14:73142509-73184054	KSR	2i	OK	4.94259	2.68442	-0.880655	4.50106	6.76156e-06	9.44879e-05	yes			Kbtbd11	Kbtbd11	Kbtbd11	chr8:15011024-15033332	KSR	ETP	OK	6.48702	8.07548	0.315993	-2.52978
											Amd1	44.1643	65.7736	78.8398	85.4195	79.4814	81.0653	80.9835	31.3807	75.0844			Nop56	Nop56	Nop56	chr2:130274411-130284451	KSR	2i	OK	280.287	229.661	-0.287401	4.49905	6.82572e-06	9.5273e-05	yes			Slc25a22	Slc25a22	Slc25a22	chr7:141429748-141437874	KSR	ETP	OK	8.35697	11.1083	0.410582	-2.52696
											Amd2	40.1122	26.87	6.40517	0.277496	0.482132	3.28768	11.9709	57.0331	8.50446			Ngfrap1	Ngfrap1	Ngfrap1	chrX:136270252-136271978	KSR	2i	OK	307.199	277.708	-0.145606	4.4971	6.8888e-06	9.60413e-05	yes			Jtb	Jtb	Jtb	chr3:90231596-90235840	KSR	ETP	OK	28.0318	35.9768	0.359999	-2.52532
											Amdhd1	0.0916697	0.0348384	0.0384477	0.263299	0.392613	0.188668	0.115613	0.210752	0.200945			Wdr35	Wdr35	Wdr35	chr12:8974000-9028847	KSR	2i	OK	21.0877	15.8483	-0.412075	4.495	6.95698e-06	9.68788e-05	yes			Golgb1	Golgb1	Golgb1	chr16:36880518-36933085	KSR	ETP	OK	5.1611	6.33285	0.295175	-2.5243
											Amdhd2	12.3462	11.667	14.9678	11.1487	8.7687	9.82942	9.57924	9.77772	11.6691			Dpysl4	Dpysl4	Dpysl4	chr7:139086000-139101791	KSR	2i	OK	2.15011	0.458595	-2.22912	4.48803	7.18838e-06	9.98683e-05	yes			Ormdl1	Ormdl1	Ormdl1	chr1:53297094-53310245	KSR	ETP	OK	15.5301	19.8727	0.355717	-2.52299
											Amelx	0	0	0	0	0	0	0	0	0			Tiparp	Tiparp	Tiparp	chr3:65527484-65555518	KSR	2i	OK	19.3348	14.3852	-0.426611	4.48806	7.18753e-06	9.98683e-05	yes			Tyw1	Tyw1	Tyw1	chr5:130255618-130341567	KSR	ETP	OK	13.5318	16.877	0.318706	-2.52187
											Amfr	9.05867	8.83203	9.02251	10.1036	11.7886	11.7222	11.5573	12.5066	14.0426			Chaf1b	Chaf1b	Chaf1b	chr16:93883900-93906106	KSR	2i	OK	49.4303	64.3664	0.380912	-4.48078	7.4371e-06	0.00010319	yes			Tmem188	Tmem188	Tmem188	chr8:88118758-88135197	KSR	ETP	OK	20.0961	25.2966	0.332029	-2.51722
											Amh	0.138816	0.183752	0.219	0	0.117614	0.231944	0.10678	0.282484	0.109457			Ipo11	Ipo11	Ipo11	chr13:106794438-106936915	KSR	2i	OK	32.3879	41.1168	0.344274	-4.48056	7.44476e-06	0.00010319	yes			Rab1	Rab1	Rab1	chr11:20201601-20226856	KSR	ETP	OK	125.482	144.996	0.208537	-2.51744
											Amhr2	2.28548	1.57203	2.46334	1.23144	2.56536	1.28402	1.81262	1.22005	1.7388			Dppa2	Dppa2	Dppa2	chr16:48310273-48319513	KSR	2i	OK	116.07	92.7793	-0.323117	4.47542	7.62598e-06	0.00010558	yes			Net1	Net1	Net1	chr13:3882560-3918220	KSR	ETP	OK	21.6659	24.6313	0.185071	-2.51654
											Amica1	0.0787713	0.0619853	0.099305	0	0.0346269	0.125406	0	0.0307487	0.104832			Chka	Chka	Chka	chr19:3851772-3894367	KSR	2i	OK	23.8459	17.2209	-0.469579	4.47481	7.6479e-06	0.000105638	yes			Bmpr1a	Bmpr1a	Bmpr1a	chr14:34411067-34502546	KSR	ETP	OK	19.0809	22.6666	0.248439	-2.51477
											Amigo1	0.664998	0.631001	0.776566	0.927581	1.03048	1.0389	0.912128	1.04922	0.707566			Fam135a	Fam135a	Fam135a	chr1:24010757-24100341	KSR	2i	OK	7.48256	5.19159	-0.527356	4.47482	7.64743e-06	0.000105638	yes			Smc5	Smc5	Smc5	chr19:23206440-23273897	KSR	ETP	OK	17.4336	19.2663	0.144214	-2.51482
											Amigo2	1.17787	0.927294	0.815517	1.84656	2.49059	1.79247	1.71422	1.7805	2.02859			Tfec	Tfec	Tfec	chr6:16833380-16898441	KSR	2i	OK	1.13558	0	-1.79769e+308	-1.79769e+308	7.67372e-06	0.000105873	yes			Sncg	Sncg	Sncg	chr14:34370273-34374669	KSR	ETP	OK	9.6894	14.6552	0.596935	-2.51165
											Amigo3	0.105116	0.218138	0.259846	0.126332	0.796629	0.499383	0.254865	0.195775	0.304155			Csf1	Csf1	Csf1	chr3:107741047-107760469	KSR	2i	OK	1.45529	0.131896	-3.46384	4.47268	7.72453e-06	0.000106451	yes			Fam108c	Fam108c	Fam108c	chr7:84109355-84151893	KSR	ETP	OK	25.9266	31.7682	0.293151	-2.51069
											Ammecr1	3.27125	2.70633	2.71997	3.51765	3.60561	4.42887	3.31952	3.18127	3.30845			Pipox	Pipox	Pipox	chr11:77880614-77893872	KSR	2i	OK	27.1194	37.2481	0.45784	-4.46999	7.82219e-06	0.000107672	yes			Polr3d	Polr3d	Polr3d	chr14:70438747-70443471	KSR	ETP	OK	22.095	26.3046	0.251592	-2.51075
											Ammecr1l	8.34763	9.49583	9.70937	12.5465	12.5623	12.5575	10.5308	11.1408	10.8977			Emp1	Emp1	Emp1	chr6:135362930-135383173	KSR	2i	OK	31.6996	23.7984	-0.413601	4.46921	7.85101e-06	0.000107945	yes			Zfp35	Zfp35	Zfp35	chr18:23989633-24005371	KSR	ETP	OK	12.8931	16.102	0.320637	-2.50926
											Amn	1.1925	0.695426	0.77982	29.499	27.2782	27.4787	11.7013	10.6108	12.3317			Cobll1	Cobll1	Cobll1	chr2:65088338-65238626	KSR	2i	OK	1.35156	0.378253	-1.8372	4.46722	7.92411e-06	0.000108715	yes			9030617O03Rik	9030617O03Rik	9030617O03Rik	chr12:100779122-100872610	KSR	ETP	OK	1.92426	2.97809	0.630085	-2.50761
											Amn1	2.90114	2.6794	2.68809	5.21464	4.37828	4.3406	3.26135	2.37593	2.79094			Ppia	Ppia	Ppia	chr11:6415869-6419810	KSR	2i	OK	2241.77	2724.92	0.281573	-4.46719	7.92524e-06	0.000108715	yes			Higd1a	Higd1a	Higd1a	chr9:121848559-121858000	KSR	ETP	OK	21.8164	27.1572	0.315918	-2.50625
											Amot	0.349801	0.432685	0.299655	7.15522	7.45521	8.02337	2.60454	3.1809	2.74451			Fam102a	Fam102a	Fam102a	chr2:32535358-32569750	KSR	2i	OK	6.97567	10.2809	0.559571	-4.46358	8.0603e-06	0.000110441	yes			Pms2	Pms2	Pms2	chr5:143910000-143931756	KSR	ETP	OK	9.03196	11.5925	0.360087	-2.506
											Amotl1	1.68574	1.89091	1.89595	1.88031	1.61113	1.97471	2.79621	3.16659	2.36492			Poldip3	Poldip3	Poldip3	chr15:83125977-83149336	KSR	2i	OK	96.1924	77.7433	-0.307206	4.46272	8.0924e-06	0.000110754	yes			Oxct1	Oxct1	Oxct1	chr15:4020110-4155344	KSR	ETP	OK	17.2057	20.9692	0.285383	-2.50582
											Amotl2	16.7285	16.954	16.7177	10.6321	11.3316	10.891	17.9877	16.9609	16.6713			6330410L21Rik	6330410L21Rik	6330410L21Rik	chr3:129677574-129763882	KSR	2i	OK	2.80566	1.26143	-1.15328	4.46109	8.15445e-06	0.000111475	yes			Pde4dip	Pde4dip	Pde4dip	chr3:97689828-97888707	KSR	ETP	OK	5.86584	7.32947	0.32137	-2.50443
											Ampd1	0.247603	0.318998	0.159603	0.112215	0.165029	0.14135	0.237309	0.289634	0.211016			Dpep3	Dpep3	Dpep3	chr8:105973519-105979419	KSR	2i	OK	4.00956	1.14033	-1.81399	4.45857	8.25095e-06	0.000112666	yes			Zfp97	Zfp97	Zfp97	chr17:17121382-17146878	KSR	ETP	OK	31.3907	37.6042	0.260554	-2.50253
											Ampd2	12.2799	11.789	12.4449	13.0166	16.0109	15.7259	14.5376	15.7499	14.8292			Eef2k	Eef2k	Eef2k	chr7:120842854-120907219	KSR	2i	OK	3.1478	5.67685	0.850748	-4.45594	8.35276e-06	0.000113926	yes			Ppat	Ppat	Ppat	chr5:76913248-76967505	KSR	ETP	OK	58.0575	67.4582	0.216514	-2.50096
											Ampd3	2.51061	2.23958	2.12478	1.92251	1.87107	1.95733	2.33099	2.61545	2.50304			Pdlim4	Pdlim4	Pdlim4	chr11:54054927-54069017	KSR	2i	OK	5.05858	0.280854	-4.17084	4.45366	8.44204e-06	0.000115012	yes			Fam189b	Fam189b	Fam189b	chr3:89183224-89189289	KSR	ETP	OK	2.83259	4.25635	0.587495	-2.4985
											Amph	6.30925	6.31823	5.62616	4.28976	4.92517	3.76601	4.22865	4.52794	4.05207			Rin3	Rin3	Rin3	chr12:102283073-102390854	KSR	2i	OK	2.37153	0.900306	-1.39733	4.45274	8.47822e-06	0.000115373	yes			Cdh4	Cdh4	Cdh4	chr2:179442477-179899375	KSR	ETP	OK	1.73435	2.4769	0.514143	-2.49661
											Amt	31.4843	34.889	35.8642	25.8389	24.7911	25.3055	27.0169	29.1858	25.442			Pmepa1	Pmepa1	Pmepa1	chr2:173224464-173276533	KSR	2i	OK	10.7668	7.47904	-0.525658	4.44985	8.59301e-06	0.000116802	yes			Cyp4f14	Cyp4f14	Cyp4f14	chr17:32905069-32917342	KSR	ETP	OK	2.02506	3.49715	0.788218	-2.49376
											Amtn	0	0	0	0	0	0	0	0	0			Amfr	Amfr	Amfr	chr8:93971587-94012640	KSR	2i	OK	14.4291	10.1736	-0.504157	4.44695	8.70965e-06	0.000118253	yes			Ypel2	Ypel2	Ypel2	chr11:86936424-86993762	KSR	ETP	OK	3.5618	4.80073	0.430649	-2.49288
											Amy1	0.0524729	0.183238	0.186432	0	0	0	0.212427	0.181969	0.194932			Mir692-1	Mir692-1	Mir692-1	chr17:6895228-6895337	KSR	2i	OK	437.576	601.725	0.45957	-4.44238	8.8968e-06	0.000120657	yes			Rcn3	Rcn3	Rcn3	chr7:45082913-45092213	KSR	ETP	OK	7.8457	11.2041	0.514048	-2.49061
											Amy2a4	0	0	0	0	0	0	0	0	0			Hmgb1	Hmgb1	Hmgb1	chr5:149047226-149053037	KSR	2i	OK	332.644	402.141	0.273724	-4.4404	8.97933e-06	0.000121638	yes			Timm8a1	Timm8a1	Timm8a1	chrX:134537257-134541629	KSR	ETP	OK	68.1635	81.5262	0.258266	-2.4907
											Amy2a4	0	0	0	0	0	0	0	0	0			Sh3tc1	Sh3tc1	Sh3tc1	chr5:35697179-35729276	KSR	2i	OK	3.5672	5.84069	0.711345	-4.4386	9.05448e-06	0.000122517	yes			2700081O15Rik	2700081O15Rik	2700081O15Rik	chr19:7417624-7483289	KSR	ETP	OK	4.66498	6.13787	0.395867	-2.48901
											Amy2a4	0	0	0	0	0	0	0	0	0			Golm1	Golm1	Golm1	chr13:59634995-59675784	KSR	2i	OK	38.013	47.9537	0.33515	-4.43746	9.10278e-06	0.000123032	yes			4930579G24Rik	4930579G24Rik	4930579G24Rik	chr3:79629078-79632819	KSR	ETP	OK	8.59865	11.6346	0.436241	-2.4879
											Amy2a5	0	0	0	0	0	0	0	0	0			Adi1	Adi1	Adi1	chr12:28675206-28682174	KSR	2i	OK	45.5951	59.7983	0.391228	-4.43476	9.21762e-06	0.000124163	yes			Xrcc2	Xrcc2	Xrcc2	chr5:25689815-25705797	KSR	ETP	OK	8.79258	11.2687	0.357968	-2.48739
											Amy2a5	0	0.0432043	0.0475409	0	0	0	0	0	0			Kat2b	Kat2b	Kat2b	chr17:53566970-53672721	KSR	2i	OK	18.3716	23.6307	0.363188	-4.43503	9.20604e-06	0.000124163	yes			Cetn2	Cetn2	Cetn2	chrX:72913564-72918344	KSR	ETP	OK	29.3315	36.981	0.334335	-2.48749
											Amy2a5	0	0	0	0	0	0	0	0	0			S1pr2	S1pr2	S1pr2	chr9:20965951-20976793	KSR	2i	OK	22.9684	16.6809	-0.461453	4.43484	9.21407e-06	0.000124163	yes			Adat1	Adat1	Adat1	chr8:111966907-111992302	KSR	ETP	OK	6.92955	9.08661	0.39098	-2.48455
											Amy2a5	0	0	0	0	0	0	0	0	0			Cdkn1a	Cdkn1a	Cdkn1a	chr17:29090985-29100722	KSR	2i	OK	33.9158	44.8894	0.404419	-4.43214	9.33041e-06	0.000125471	yes			Ubn2	Ubn2	Ubn2	chr6:38433924-38512763	KSR	ETP	OK	3.50435	4.29957	0.295046	-2.48288
											Amy2b	0	0	0	0	0	0	0	0	0			Ctsc	Ctsc	Ctsc	chr7:88278092-88310875	KSR	2i	OK	12.7742	18.5052	0.534696	-4.43201	9.33577e-06	0.000125471	yes			Trim35	Trim35	Trim35	chr14:66295328-66311424	KSR	ETP	OK	26.0568	31.0605	0.253421	-2.48262
											Amz1	0.47804	0.641895	0.776643	0.594209	0.797308	0.915213	0.80005	0.75673	0.943351			Tmem88	Tmem88	Tmem88	chr11:69395790-69398234	KSR	2i	OK	20.0947	12.9419	-0.63477	4.43006	9.42083e-06	0.000126472	yes			Crybg3	Crybg3	Crybg3	chr16:59471774-59555752	KSR	ETP	OK	6.45449	8.02636	0.314442	-2.48175
											Amz2	8.59766	10.3557	8.04049	7.56764	7.47076	8.01495	8.07259	8.04026	8.04295			Slc5a4b	Slc5a4b	Slc5a4b	chr10:76058620-76111018	KSR	2i	OK	7.55119	3.98649	-0.921586	4.42831	9.49728e-06	0.000127355	yes			Cox7a2	Cox7a2	Cox7a2	chr9:79755240-79759853	KSR	ETP	OK	158.421	186.718	0.237098	-2.47913
											Anapc1	18.3068	20.6265	18.8696	15.6713	16.3054	17.6558	19.0741	20.4101	19.0583			Wls	Wls	Wls	chr3:159839694-159935175	KSR	2i	OK	4.43111	2.10262	-1.07548	4.4278	9.52009e-06	0.000127425	yes			D6Wsu163e	D6Wsu163e	D6Wsu163e	chr6:126939965-126975704	KSR	ETP	OK	9.80951	12.8579	0.390404	-2.47369
											Anapc10	7.5729	7.45114	7.21088	10.6927	7.867	9.21473	7.73946	6.89789	7.0367			Zmat2	Zmat2	Zmat2	chr18:36793922-36799660	KSR	2i	OK	44.989	57.7741	0.36085	-4.42771	9.52384e-06	0.000127425	yes			Rad51ap1	Rad51ap1	Rad51ap1	chr6:126923418-126939555	KSR	ETP	OK	22.6001	28.0353	0.310916	-2.47283
											Anapc11	12.9493	13.3791	13.3979	14.5767	12.1523	12.9481	13.2017	12.4764	13.4999			Peg3	Peg3	Peg3	chr7:6705959-6730419	KSR	2i	OK	5.10548	3.33103	-0.616078	4.42455	9.6643e-06	0.00012916	yes			Asgr2	Asgr2	Asgr2	chr11:70092643-70106186	KSR	ETP	OK	1.87635	3.59829	0.939387	-2.47227
											Anapc13	57.8939	67.5832	59.7144	48.7994	51.0955	61.3508	51.9672	43.5098	57.5023			Adipor2	Adipor2	Adipor2	chr6:119353149-119417483	KSR	2i	OK	30.5736	38.9679	0.349999	-4.42401	9.68837e-06	0.000129337	yes			P4htm	P4htm	P4htm	chr9:108578825-108597600	KSR	ETP	OK	3.33518	5.27197	0.660577	-2.47162
											Anapc16	12.2969	13.0904	13.4435	15.8888	13.5088	16.0705	13.2751	13.6605	14.5396			Tax1bp3	Tax1bp3	Tax1bp3	chr11:73177082-73182046	KSR	2i	OK	16.3044	9.75382	-0.741226	4.42084	9.83168e-06	0.000131104	yes			Mis12	Mis12	Mis12	chr11:71019610-71027134	KSR	ETP	OK	16.2853	20.0376	0.299138	-2.47083
											Anapc2	28.7509	28.5102	26.4797	24.4092	25.2992	24.3749	25.5848	26.3869	25.4362			Tmtc3	Tmtc3	Tmtc3	chr10:100443901-100487347	KSR	2i	OK	13.7956	10.302	-0.421284	4.42048	9.8483e-06	0.000131179	yes			5830433M19Rik	5830433M19Rik	5830433M19Rik	chr4:94500078-94556796	KSR	ETP	OK	11.4087	14.7962	0.37509	-2.4703
											Anapc4	21.0132	24.5272	20.5952	21.8862	23.5825	23.0033	21.9433	20.0526	22.8924			4930550L24Rik	4930550L24Rik	4930550L24Rik	chrX:58911460-58920304	KSR	2i	OK	9.1645	4.7235	-0.956199	4.41967	9.88523e-06	0.000131378	yes			Bhlhb9	Bhlhb9	Bhlhb9	chrX:135885850-135891081	KSR	ETP	OK	16.549	20.0391	0.276074	-2.46713
											Anapc5	124.126	130.956	126.981	91.1594	100.562	101.605	111.88	114.369	109.32			Ctr9	Ctr9	Ctr9	chr7:111028950-111056377	KSR	2i	OK	29.1577	22.5319	-0.371907	4.41982	9.87839e-06	0.000131378	yes			Glud1	Glud1	Glud1	chr14:34310726-34345033	KSR	ETP	OK	239.397	274.403	0.196888	-2.46442
											Anapc7	21.4338	22.6229	23.4479	23.229	21.4518	21.4749	24.4217	26.0869	26.9974			Cxcl16	Cxcl16	Cxcl16	chr11:70454233-70466199	KSR	2i	OK	2.43312	0.624642	-1.9617	4.41258	1.02147e-05	0.000135605	yes			Senp5	Senp5	Senp5	chr16:31959669-32003287	KSR	ETP	OK	5.66599	7.09838	0.32516	-2.46106
											Ang	0.332182	0.780141	0.395677	0.536672	0.892028	1.14574	0.883297	0.348662	0.782172			Phlda3	Phlda3	Phlda3	chr1:135766084-135769134	KSR	2i	OK	34.1236	23.9253	-0.512233	4.40938	1.03665e-05	0.000137469	yes			Gabpa	Gabpa	Gabpa	chr16:84827870-84863778	KSR	ETP	OK	32.4288	37.8849	0.224346	-2.46058
											Ang2	0	0	0.196692	0	0	0	0	0	0			Mvp	Mvp	Mvp	chr7:126986859-127014594	KSR	2i	OK	10.7737	6.8267	-0.658258	4.40613	1.05233e-05	0.000139392	yes			Slc13a5	Slc13a5	Slc13a5	chr11:72241993-72266604	KSR	ETP	OK	17.3069	21.1188	0.287187	-2.45964
											Ang3	0	0	0	0	0	0	0	0	0			AV320801	AV320801	AV320801	chrX:135494587-135504594	KSR	2i	OK	10.5057	7.10479	-0.564307	4.40443	1.06061e-05	0.000140334	yes			Arpc5	Arpc5	Arpc5	chr1:152766541-152775580	KSR	ETP	OK	57.5386	68.1096	0.243328	-2.45939
											Ang4	0.159979	0	0	0	0.120262	0	0	0	0			Trim52	Trim52	Trim52	chr14:106106197-106109280	KSR	2i	OK	3.14961	1.32456	-1.24965	4.40414	1.06207e-05	0.000140371	yes			Wdr90	Wdr90	Wdr90	chr17:25838837-25861515	KSR	ETP	OK	3.19092	4.25605	0.415543	-2.45899
											Ang5	0	0	0	0	0	0	0	0	0			Pdpn	Pdpn	Pdpn	chr4:143267421-143299507	KSR	2i	OK	10.5855	6.01965	-0.814335	4.40337	1.0658e-05	0.000140554	yes			Ccdc112	Ccdc112	Ccdc112	chr18:46282150-46311928	KSR	ETP	OK	5.41685	7.36079	0.442407	-2.45847
											Ang6	0	0	0	0	0	0	0	0	0			Plxna1	Plxna1	Plxna1	chr6:89316313-89362613	KSR	2i	OK	21.9303	17.4186	-0.332297	4.40345	1.06541e-05	0.000140554	yes			Mob1a	Mob1a	Mob1a	chr6:83326038-83340949	KSR	ETP	OK	33.3721	40.7601	0.288516	-2.45862
											Angel1	7.53792	7.95475	7.38584	7.47921	7.73132	7.37533	8.03688	7.7176	7.67484			Mthfd2	Mthfd2	Mthfd2	chr6:83305703-83317604	KSR	2i	OK	95.0358	75.5898	-0.330279	4.39829	1.09108e-05	0.000143729	yes			Mettl8	Mettl8	Mettl8	chr2:70964561-71055606	KSR	ETP	OK	8.79565	11.3476	0.367532	-2.45757
											Angel2	12.799	13.8868	13.0705	19.9223	20.638	20.5037	14.5775	15.1136	14.5138			Lhpp	Lhpp	Lhpp	chr7:132610642-132706419	KSR	2i	OK	5.97648	10.8336	0.858138	-4.39706	1.09725e-05	0.000144383	yes			Ntan1	Ntan1	Ntan1	chr16:13819276-13903135	KSR	ETP	OK	36.9182	45.7557	0.309616	-2.45635
											Angpt1	0	0	0	0	0	0	0.0208178	0.0388526	0.0864375			Nrg2	Nrg2	Nrg2	chr18:36017657-36197160	KSR	2i	OK	2.36758	0.550966	-2.10338	4.38993	1.1339e-05	0.000149041	yes			Surf4	Surf4	Surf4	chr2:26913377-26933511	KSR	ETP	OK	46.7857	54.9807	0.232858	-2.45633
											Angpt2	0.208216	0.12209	0.206909	0.0998374	0.107504	0.163659	0.140279	0.196543	0.286101			Cpt1b	Cpt1b	Cpt1b	chr15:89416404-89429927	KSR	2i	OK	2.62319	5.48409	1.06393	-4.38874	1.1401e-05	0.000149691	yes			Sc4mol	Sc4mol	Sc4mol	chr8:64718144-64733578	KSR	ETP	OK	85.2012	99.5179	0.224081	-2.45201
											Angpt4	0	0	0	0	0.0719513	0	0.0672913	0	0			Sdhc	Sdhc	Sdhc	chr1:171129156-171150603	KSR	2i	OK	91.4245	116.918	0.354838	-4.38611	1.15395e-05	0.000151343	yes			Fnip2	Fnip2	Fnip2	chr3:79345375-79567679	KSR	ETP	OK	8.37075	10.1746	0.281548	-2.45099
											Angptl1	0.0422332	0.0318032	0.0353761	0	0.0733533	0	0.0348641	0	0			Parm1	Parm1	Parm1	chr5:91517699-91623996	KSR	2i	OK	2.77448	0.684342	-2.01943	4.38311	1.16995e-05	0.000153274	yes			Zc3h4	Zc3h4	Zc3h4	chr7:16401195-16437696	KSR	ETP	OK	11.7883	14.2225	0.270815	-2.45103
											Angptl2	0.101447	0.189329	0.0843643	0.362822	0.227591	0.0984726	0.271246	0.251366	0.310928			Akt1	Akt1	Akt1	chr12:112653820-112674276	KSR	2i	OK	19.939	14.2196	-0.487713	4.38191	1.17642e-05	0.000153953	yes			Suclg1	Suclg1	Suclg1	chr6:73248504-73276907	KSR	ETP	OK	109.825	128.409	0.225546	-2.44805
											Angptl3	0	0	0	0	0	0	0	0	0			Tubb2a-ps2	Tubb2a-ps2	Tubb2a-ps2	chr12:11882195-11882899	KSR	2i	OK	19.9512	32.3658	0.697994	-4.38148	1.17876e-05	0.00015409	yes			Tbc1d24	Tbc1d24	Tbc1d24	chr17:24175430-24209387	KSR	ETP	OK	3.58723	4.44356	0.308844	-2.44697
											Angptl4	13.2304	12.8111	11.6397	11.2608	11.4801	11.7687	13.3266	11.3595	11.8517			Gclc	Gclc	Gclc	chr9:77754534-77794489	KSR	2i	OK	21.7707	16.1533	-0.430553	4.37605	1.20847e-05	0.000157801	yes			Chek2	Chek2	Chek2	chr5:110840016-110874133	KSR	ETP	OK	19.7223	24.2643	0.299012	-2.44707
											Angptl6	4.08573	3.08787	2.56386	2.22117	2.08203	2.43425	3.57745	4.21674	3.90458			Ptplb	Ptplb	Ptplb	chr16:35022420-35109175	KSR	2i	OK	22.9411	17.1889	-0.416456	4.37577	1.21005e-05	0.000157835	yes			Gm16702	Gm16702	Gm16702	chr17:8372395-8422726	KSR	ETP	OK	24.0619	29.2133	0.279874	-2.44567
											Angptl7	0	0	0	0	0	0	0	0	0			Zyx	Zyx	Zyx	chr6:42349827-42358395	KSR	2i	OK	12.7282	8.04497	-0.661875	4.36626	1.26394e-05	0.000164684	yes			Tead4	Tead4	Tead4	chr6:128227142-128300813	KSR	ETP	OK	9.15238	11.4914	0.328333	-2.44416
											Ank	2.95669	3.57713	3.14626	5.03794	5.01921	5.77922	4.70254	4.62443	4.93603			Cox6b1	Cox6b1	Cox6b1	chr7:30616973-30626151	KSR	2i	OK	277.888	350.339	0.334248	-4.36271	1.28461e-05	0.000167195	yes			Cpn1	Cpn1	Cpn1	chr19:43956307-43986520	KSR	ETP	OK	8.33169	11.4037	0.452817	-2.44317
											Ank1	0.0613421	0.0869966	0.0571467	0.0987997	0.107924	0.119144	0.049569	0.0606161	0.0676141			Lpp	Lpp	Lpp	chr16:24392555-24992578	KSR	2i	OK	2.1154	1.42523	-0.56973	4.36223	1.28744e-05	0.000167381	yes			Camsap3	Camsap3	Camsap3	chr8:3587449-3609075	KSR	ETP	OK	12.2432	14.5666	0.250685	-2.44284
											Ank2	1.35937	1.29462	1.34509	1.10044	1.41051	1.18124	1.35361	1.73704	1.78384			4921508A21Rik	4921508A21Rik	4921508A21Rik	chr11:55191718-55197682	KSR	2i	OK	5.07675	2.06128	-1.30036	4.35958	1.30314e-05	0.000169239	yes			Eif4e	Eif4e	Eif4e	chr3:138526190-138557599	KSR	ETP	OK	77.4434	89.6757	0.211575	-2.43939
											Ank3	1.81355	1.71632	1.47206	0.581441	0.40904	0.617291	1.05482	0.943747	0.862025			4930500J02Rik	4930500J02Rik	4930500J02Rik	chr2:104559183-104571429	KSR	2i	OK	26.058	39.0234	0.582613	-4.35665	1.32068e-05	0.00017133	yes			Gm20604	Gm20604	Gm20604	chr12:102739829-102757810	KSR	ETP	OK	9.77717	12.6062	0.366642	-2.43757
											Ankar	0	0.0180451	0.0800287	0.0852487	0.0609408	0.0729815	0.0198037	0.0187387	0.0408854			Inf2	Inf2	Inf2	chr12:112588783-112615557	KSR	2i	OK	5.38014	3.23892	-0.732132	4.34953	1.3643e-05	0.000176797	yes			Tmem167	Tmem167	Tmem167	chr13:90089666-90114921	KSR	ETP	OK	7.56367	9.01336	0.252977	-2.43562
											Ankdd1b	0.248399	0.31378	0.211494	0.782306	0.869306	0.553783	0.549557	0.433708	0.498521			Traf4	Traf4	Traf4	chr11:78158422-78165550	KSR	2i	OK	33.1704	25.3594	-0.387376	4.34719	1.37893e-05	0.000178499	yes			Chic1	Chic1	Chic1	chrX:103356475-103396118	KSR	ETP	OK	2.38057	3.18025	0.417831	-2.4354
											Ankfn1	0	0	0	0	0	0	0	0	0			Ivns1abp	Ivns1abp	Ivns1abp	chr1:151344497-151364445	KSR	2i	OK	118.782	102.038	-0.219213	4.34679	1.38144e-05	0.000178509	yes			Pou5f1	Pou5f1	Pou5f1	chr17:35506031-35510777	KSR	ETP	OK	883.492	979.395	0.148674	-2.43459
											Ankfy1	24.8579	27.0264	25.5737	30.2349	25.317	28.1482	26.306	28.0578	25.7392			Kif5b	Kif5b	Kif5b	chr18:6201004-6241524	KSR	2i	OK	41.2049	50.756	0.300765	-4.3467	1.382e-05	0.000178509	yes			Tspan3	Tspan3	Tspan3	chr9:56135883-56161070	KSR	ETP	OK	36.4931	44.1427	0.274553	-2.43367
											Ankhd1	12.3823	13.8519	13.5457	11.1096	11.8276	12.0924	12.5471	13.5438	12.7508			Man2b2	Man2b2	Man2b2	chr5:36806812-36830649	KSR	2i	OK	5.87465	3.35756	-0.807089	4.34591	1.38699e-05	0.00017896	yes			Sugp2	Sugp2	Sugp2	chr8:70220192-70263105	KSR	ETP	OK	8.57631	10.6571	0.313389	-2.43291
											Ankib1	3.32728	3.84107	3.64388	4.93985	4.93114	5.90034	4.82487	5.25195	4.75779			Alas1	Alas1	Alas1	chr9:106233454-106247954	KSR	2i	OK	19.9173	14.1536	-0.492857	4.34402	1.39896e-05	0.00018031	yes			Vcpip1	Vcpip1	Vcpip1	chr1:9723195-9771256	KSR	ETP	OK	7.30263	9.10586	0.318379	-2.4319
											Ankk1	0.125502	0.0876704	0.0676391	0.0511963	0.0357847	0.0410494	0.201299	0.155854	0.142946			Gm15023	Gm15023	Gm15023	chrX:135167623-135177632	KSR	2i	OK	10.5397	7.17819	-0.554141	4.3411	1.41773e-05	0.000182533	yes			Eed	Eed	Eed	chr7:89954653-89980976	KSR	ETP	OK	156.196	179.749	0.202622	-2.43175
											Ankle1	2.24527	2.28811	2.01972	3.29717	3.47974	3.58558	3.11719	3.30586	2.74328			Ckmt1	Ckmt1	Ckmt1	chr2:121358640-121380940	KSR	2i	OK	17.7197	25.9255	0.549018	-4.33356	1.46714e-05	0.000188691	yes			Nkrf	Nkrf	Nkrf	chrX:36887541-36902899	KSR	ETP	OK	9.2973	11.7871	0.342325	-2.43049
											Ankle2	8.28319	9.10687	8.66979	7.39312	8.38423	8.19148	8.48034	8.45755	8.75566			Eif4a3	Eif4a3	Eif4a3	chr11:119288362-119300043	KSR	2i	OK	171.888	138.831	-0.308137	4.33174	1.47934e-05	0.000190055	yes			Mki67ip	Mki67ip	Mki67ip	chr1:118321842-118333831	KSR	ETP	OK	66.2341	77.7006	0.230351	-2.43038
											Ankmy1	0.0411042	0.0578432	0.0334409	0.145123	0.105281	0.114991	0.0664761	0	0.0339988			Foxp1	Foxp1	Foxp1	chr6:98925341-99435345	KSR	2i	OK	3.69915	2.2905	-0.69153	4.32813	1.5038e-05	0.00019299	yes			Gm10416	Gm10416	Gm10416	chr5:109833500-109834142	KSR	ETP	OK	7.94889	12.3459	0.635211	-2.42815
											Ankmy2	13.1068	14.0175	11.6868	13.0959	11.1356	11.219	11.789	12.4294	12.1152			Lrp1	Lrp1	Lrp1	chr10:127538157-127621148	KSR	2i	OK	3.7374	5.06451	0.438387	-4.32537	1.52279e-05	0.000195217	yes			Evc	Evc	Evc	chr5:37299170-37336881	KSR	ETP	OK	2.15299	3.10561	0.528537	-2.42858
											Ankra2	6.10356	6.32735	6.78344	4.83396	5.25947	7.33897	6.11215	5.83716	5.03933			Tmem150a	Tmem150a	Tmem150a	chr6:72355482-72362381	KSR	2i	OK	12.1331	6.84862	-0.825062	4.32456	1.52835e-05	0.00019572	yes			Mettl17	Mettl17	Mettl17	chr14:51884841-51891868	KSR	ETP	OK	12.4435	16.3868	0.397141	-2.42727
											Ankrd1	0	0	0.0498848	0.0728523	0.104308	0.239009	0.149156	0.238627	0.258827			Tceal8	Tceal8	Tceal8	chrX:136168983-136172251	KSR	2i	OK	24.2917	32.2148	0.407259	-4.32063	1.55582e-05	0.000199025	yes			Tmem231	Tmem231	Tmem231	chr8:111912017-111933791	KSR	ETP	OK	20.9541	25.3982	0.277494	-2.42261
											Ankrd10	30.4656	29.3937	31.1629	25.1729	28.7075	28.3756	25.1771	22.9434	24.4327			Mtap7	Mtap7	Mtap7	chr10:20148919-20281590	KSR	2i	OK	23.8813	18.1143	-0.398756	4.31883	1.56855e-05	0.000200439	yes			2810432L12Rik	2810432L12Rik	2810432L12Rik	chr4:49584505-49597870	KSR	ETP	OK	0.898916	1.68422	0.905827	-2.41945
											Ankrd11	19.3388	21.4065	21.6374	19.0074	22.0925	19.9714	20.3242	22.3789	19.9189			H2afy2	H2afy2	H2afy2	chr10:61715262-61783864	KSR	2i	OK	15.1613	22.0283	0.538965	-4.31687	1.58259e-05	0.000202017	yes			B3gnt3	B3gnt3	B3gnt3	chr8:71691719-71701800	KSR	ETP	OK	2.0818	3.49077	0.745713	-2.41949
											Ankrd12	1.32427	1.49712	1.35767	1.88428	1.98221	1.84353	1.27555	1.46821	1.43291			Nono	Nono	Nono	chrX:101429650-101448593	KSR	2i	OK	173.437	190.297	0.13384	-4.31527	1.5941e-05	0.000203269	yes			Fmr1	Fmr1	Fmr1	chrX:68678554-68717961	KSR	ETP	OK	22.1602	26.2435	0.243991	-2.41829
											Ankrd13a	38.8986	38.6075	39.1321	31.1717	34.001	35.1688	33.1445	36.1534	34.6282			Lpl	Lpl	Lpl	chr8:68880554-68906932	KSR	2i	OK	5.4912	8.2697	0.590715	-4.31478	1.59762e-05	0.000203501	yes			Kcnip3	Kcnip3	Kcnip3	chr2:127456497-127521370	KSR	ETP	OK	1.34	2.29405	0.775664	-2.41655
											Ankrd13b	1.86129	1.92364	1.86441	2.13178	3.00476	2.55978	1.83604	2.2655	1.7835			Tmem8	Tmem8	Tmem8	chr17:26113315-26123253	KSR	2i	OK	11.6707	16.2653	0.478909	-4.31238	1.6151e-05	0.000205508	yes			Ngrn	Ngrn	Ngrn	chr7:80261214-80265378	KSR	ETP	OK	37.7063	45.6677	0.276369	-2.41466
											Ankrd13c	21.6859	23.0782	22.2198	23.5224	22.4978	23.2804	24.3921	23.9413	23.4614			Srm	Srm	Srm	chr4:148591512-148594619	KSR	2i	OK	186.13	149.881	-0.312494	4.31214	1.61682e-05	0.000205509	yes			Zbtb10	Zbtb10	Zbtb10	chr3:9250566-9285332	KSR	ETP	OK	4.94053	6.16939	0.320462	-2.41407
											Ankrd13d	1.16354	0.926143	0.968351	1.20779	1.48616	1.50937	0.656062	1.12093	0.892818			Fgfbp1	Fgfbp1	Fgfbp1	chr5:43978860-43981762	KSR	2i	OK	4.51345	1.19674	-1.91513	4.31	1.63254e-05	0.000207286	yes			Vps26a	Vps26a	Vps26a	chr10:62454842-62486805	KSR	ETP	OK	34.6872	40.9256	0.238599	-2.41357
											Ankrd16	4.031	3.51267	4.41179	3.06568	4.48234	3.77497	4.03297	3.22311	3.92017			Mosc2	Mosc2	Mosc2	chr1:184813067-184845847	KSR	2i	OK	19.4452	13.0668	-0.573507	4.30967	1.635e-05	0.000207378	yes			Eaf1	Eaf1	Eaf1	chr14:31495078-31509858	KSR	ETP	OK	30.6761	35.9828	0.230196	-2.41347
											Ankrd17	17.4754	18.9219	17.8944	17.6085	18.3462	18.7028	17.0385	20.616	18.2069			Ebp	Ebp	Ebp	chrX:8185330-8193512	KSR	2i	OK	15.5482	22.81	0.55292	-4.30756	1.65066e-05	0.000209142	yes			Alg5	Alg5	Alg5	chr3:54735538-54749795	KSR	ETP	OK	17.3975	22.3147	0.359112	-2.41332
											Ankrd2	0	0	0	0	0	0.103294	0	0	0			Lap3	Lap3	Lap3	chr5:45493373-45512691	KSR	2i	OK	161.33	195.958	0.280534	-4.30682	1.65621e-05	0.000209623	yes			Odz3	Odz3	Odz3	chr8:48225664-48674690	KSR	ETP	OK	1.88301	2.4835	0.399336	-2.41277
											Ankrd22	0.40075	0.267713	0.286602	0	0.0499489	0.0601406	0.809435	0.932154	0.723523			S100a10	S100a10	S100a10	chr3:93555116-93564645	KSR	2i	OK	113.385	84.5045	-0.42413	4.30344	1.68166e-05	0.000212618	yes			AU019823	AU019823	AU019823	chr9:50603900-50625000	KSR	ETP	OK	16.0985	19.504	0.276843	-2.41137
											Ankrd23	0.390098	0.648864	0.63264	0.681499	1.01536	0.821721	0.548481	0.905022	0.662409			Cdipt	Cdipt	Cdipt	chr7:126976348-126980501	KSR	2i	OK	36.5946	28.0359	-0.384354	4.30167	1.69517e-05	0.0002141	yes			Lims2	Lims2	Lims2	chr18:31931506-31958619	KSR	ETP	OK	2.49237	4.24561	0.768453	-2.41115
											Ankrd24	1.33068	1.4675	2.18311	1.41586	1.11465	1.29307	1.52417	1.40806	1.22411			3830417A13Rik	3830417A13Rik	3830417A13Rik	chrX:64173547-64178778	KSR	2i	OK	2.77258	0.591038	-2.22991	4.29922	1.71398e-05	0.000216069	yes			Dlst	Dlst	Dlst	chr12:85110832-85134091	KSR	ETP	OK	51.3716	60.0064	0.224146	-2.40658
											Ankrd26	3.47177	3.57999	3.58059	4.33291	4.78427	4.9933	3.89791	3.86271	3.91797			Slc19a2	Slc19a2	Slc19a2	chr1:164249054-164265368	KSR	2i	OK	34.1506	26.5433	-0.363561	4.29917	1.71438e-05	0.000216069	yes			Trub1	Trub1	Trub1	chr19:57452905-57491005	KSR	ETP	OK	9.81	12.0121	0.292164	-2.40591
											Ankrd27	14.5316	15.0413	15.3687	13.3145	12.4329	13.3657	16.9122	16.6178	17.8593			Gm805	Gm805	Gm805	chr12:86169340-86195102	KSR	2i	OK	2.20938	0.776682	-1.50824	4.29767	1.72604e-05	0.00021731	yes			Mir703	Mir703	Mir703	chr5:98329303-98802019	KSR	ETP	OK	274.964	344.476	0.325161	-2.40469
											Ankrd28	15.0877	16.7224	16.1003	15.5781	15.8918	16.2666	16.5178	16.9689	15.1886			Arap2	Arap2	Arap2	chr5:62602445-62766177	KSR	2i	OK	2.52452	1.44384	-0.806103	4.29719	1.72974e-05	0.000217546	yes			Magt1	Magt1	Magt1	chrX:105968084-106011899	KSR	ETP	OK	13.7242	15.7253	0.19636	-2.40457
											Ankrd29	0.0327704	0	0.0278283	0	0.028221	0.0687062	0.0271964	0	0.0286557			Noc2l	Noc2l	Noc2l	chr4:156236009-156255338	KSR	2i	OK	70.5204	56.3951	-0.322471	4.29632	1.73659e-05	0.000218178	yes			Zar1	Zar1	Zar1	chr5:72577113-72581084	KSR	ETP	OK	0.201908	1.62994	3.01305	-2.40365
											Ankrd32	4.24273	5.46115	4.48921	5.56156	5.69724	5.88282	4.89751	4.97208	5.14235			Gfpt1	Gfpt1	Gfpt1	chr6:87042845-87092207	KSR	2i	OK	9.87841	7.227	-0.450882	4.29384	1.75609e-05	0.000220397	yes			Prkab1	Prkab1	Prkab1	chr5:116013589-116024428	KSR	ETP	OK	18.3391	22.8878	0.319657	-2.40402
											Ankrd33	0	0	0	0.0992779	0	0	0	0	0			Riok2	Riok2	Riok2	chr17:17374331-17394899	KSR	2i	OK	44.2985	34.9234	-0.343064	4.29272	1.76494e-05	0.000221275	yes			Cdc123	Cdc123	Cdc123	chr2:5794293-5844960	KSR	ETP	OK	52.4283	62.3174	0.249288	-2.40235
											Ankrd33b	3.95787	4.39009	4.23425	14.3466	14.8551	16.1179	5.83138	5.8713	5.8528			Fam83g	Fam83g	Fam83g	chr11:61672781-61720799	KSR	2i	OK	1.75752	0.683364	-1.36281	4.29061	1.78187e-05	0.000223163	yes			Acsl3	Acsl3	Acsl3	chr1:78657824-78707743	KSR	ETP	OK	22.5535	26.4323	0.228951	-2.40206
											Ankrd34a	0.840617	0.676567	1.14758	1.72525	2.4345	2.67259	0.837552	0.744575	0.835441			AU018091	AU018091	AU018091	chr7:3154658-3169203	KSR	2i	OK	61.9011	76.3042	0.301797	-4.28967	1.78941e-05	0.000223873	yes			Ubfd1	Ubfd1	Ubfd1	chr7:122067197-122082199	KSR	ETP	OK	28.9028	33.8246	0.226862	-2.40216
											Ankrd34b	0.0852174	0.0442743	0.023826	0.0353649	0	0.118614	0.0477299	0.0448051	0.0761595			Gm6682	Gm6682	Gm6682	chr12:4782169-4783512	KSR	2i	OK	294.568	357.028	0.277438	-4.28933	1.79211e-05	0.000223977	yes			Ets1	Ets1	Ets1	chr9:32696041-32757820	KSR	ETP	OK	1.08349	1.70881	0.657302	-2.39846
											Ankrd34c	0	0	0.0368823	0.105019	0.0371969	0	0.0367603	0	0			Exoc3l	Exoc3l	Exoc3l	chr8:105289923-105296098	KSR	2i	OK	10.1354	6.17443	-0.715021	4.28774	1.80498e-05	0.000225114	yes			Tmco1	Tmco1	Tmco1	chr1:167308669-167333978	KSR	ETP	OK	15.2459	18.2841	0.262169	-2.39752
											Ankrd35	1.28153	1.80033	1.8909	0.407796	0.791195	0.596466	0.876027	0.683408	1.28487			Tuba1a	Tuba1a	Tuba1a	chr15:98949846-98953501	KSR	2i	OK	419.199	504.183	0.266311	-4.28788	1.80389e-05	0.000225114	yes			Tmem14c	Tmem14c	Tmem14c	chr13:41016249-41022582	KSR	ETP	OK	78.2823	93.5295	0.256735	-2.39746
											Ankrd36	0.0229388	0	0.0377659	0.0531056	0.0198055	0	0.0197124	0	0.0400932			Mctp2	Mctp2	Mctp2	chr7:72077829-72306595	KSR	2i	OK	2.49577	1.31707	-0.922152	4.28621	1.81748e-05	0.000226436	yes			Pspc1	Pspc1	Pspc1	chr14:56722448-56778316	KSR	ETP	OK	54.7931	64.1774	0.228069	-2.39775
											Ankrd37	1.65677	0.651092	1.16309	1.98985	1.5309	2.1242	2.99933	1.41603	1.8028			Tsnax	Tsnax	Tsnax	chr8:125012996-125034192	KSR	2i	OK	44.9463	34.7786	-0.370006	4.28436	1.83268e-05	0.000228092	yes			Gm3002	Gm3002	Gm3002	chr14:3814912-3830681	KSR	ETP	OK	8.84056	10.8205	0.291552	-2.39666
											Ankrd39	2.27856	2.10159	2.14287	3.34595	3.13406	3.4346	3.03488	2.83583	2.43029			Nanog	Nanog	Nanog	chr6:122707567-122713778	KSR	2i	OK	316.183	382.424	0.274414	-4.28338	1.84076e-05	0.000228859	yes			Cisd1	Cisd1	Cisd1	chr10:71330493-71344849	KSR	ETP	OK	55.0828	67.0809	0.284298	-2.39646
											Ankrd40	16.7607	18.0977	15.1746	15.4062	15.3612	15.9384	17.8044	17.9639	16.3521			Ctdsp1	Ctdsp1	Ctdsp1	chr1:74391608-74397285	KSR	2i	OK	12.4267	17.6536	0.506515	-4.27839	1.88252e-05	0.000233809	yes			Polr2a	Polr2a	Polr2a	chr11:69734409-69758223	KSR	ETP	OK	99.365	113.716	0.194623	-2.39645
											Ankrd42	0.526816	0.551523	0.620832	1.03099	0.711598	0.783017	0.733806	0.862326	0.668373			Slc24a6	Slc24a6	Slc24a6	chr5:120511191-120534024	KSR	2i	OK	9.32764	13.3742	0.519868	-4.27603	1.90257e-05	0.000236053	yes			Ncapd2	Ncapd2	Ncapd2	chr6:125168006-125191586	KSR	ETP	OK	66.7937	76.9085	0.20343	-2.39577
											Ankrd44	1.32555	1.42291	1.69842	1.83116	1.74206	1.87054	1.61512	1.30057	1.62656			AA986860	AA986860	AA986860	chr1:130731975-130744622	KSR	2i	OK	1.66723	0.265606	-2.65009	4.27453	1.91538e-05	0.000237149	yes			Rnf39	Rnf39	Rnf39	chr17:36943050-36947986	KSR	ETP	OK	1.47844	3.09691	1.06676	-2.39406
											Ankrd45	7.09443	7.96116	6.6745	7.90509	7.66862	7.99752	5.64782	5.65571	5.8571			Capn6	Capn6	Capn6	chrX:143802236-143827412	KSR	2i	OK	1.38532	0.211155	-2.71385	4.27474	1.91359e-05	0.000237149	yes			Fam36a	Fam36a	Fam36a	chr1:178319152-178322693	KSR	ETP	OK	14.7341	22.01	0.578998	-2.39183
											Ankrd46	15.6133	17.7259	16.4058	20.9061	19.4411	21.7928	19.0195	18.073	19.495			Akap11	Akap11	Akap11	chr14:78492245-78536860	KSR	2i	OK	12.5699	9.78376	-0.361516	4.26655	1.98523e-05	0.000245544	yes			Parl	Parl	Parl	chr16:20279820-20302362	KSR	ETP	OK	61.8408	73.4563	0.248327	-2.39166
											Ankrd49	10.4339	10.5814	8.71594	13.031	11.1814	13.3291	11.037	9.57315	11.0102			Nid1	Nid1	Nid1	chr13:13437601-13512275	KSR	2i	OK	22.9792	28.8381	0.327649	-4.26047	2.04002e-05	0.000252059	yes			Smek2	Smek2	Smek2	chr11:29172906-29220797	KSR	ETP	OK	20.5651	24.2381	0.237081	-2.3922
											Ankrd5	0.0830836	0	0.068606	0.099814	0.0728506	0	0.0708144	0.0327202	0.0727715			Amd1	Amd1,Amd2	Amd1,Amd2	chr10:40287457-40302188	KSR	2i	OK	0.482231	4.89652	3.34396	-4.25877	2.05554e-05	0.000253715	yes			Rab23	Rab23	Rab23	chr1:33719895-33742564	KSR	ETP	OK	11.7639	14.1542	0.266863	-2.38867
											Ankrd50	1.30803	1.87749	1.54164	1.76683	1.39406	1.7827	1.81656	2.52752	1.83233			Fam38a	Fam38a	Fam38a	chr8:122476142-122551329	KSR	2i	OK	20.0228	15.8399	-0.338079	4.25681	2.07362e-05	0.000255682	yes			Cxcl14	Cxcl14	Cxcl14	chr13:56288642-56296551	KSR	ETP	OK	1.03269	2.15716	1.06273	-2.38717
											Ankrd52	3.36191	4.07566	4.09735	2.51995	3.83422	3.52666	3.26861	4.17456	3.4854			Pgc	Pgc	Pgc	chr17:47726841-47734478	KSR	2i	OK	2.94676	6.92174	1.232	-4.25048	2.13311e-05	0.000262747	yes			Mterfd1	Mterfd1	Mterfd1	chr13:66912097-67032405	KSR	ETP	OK	22.0559	27.6969	0.32856	-2.38651
											Ankrd53	0.082362	0.0557462	0.0661215	0.0890715	0.265012	0.0728568	0	0.0603114	0.131942			Krt7	Krt7	Krt7	chr15:101412402-101427806	KSR	2i	OK	3.41498	0.239844	-3.83171	4.25024	2.13537e-05	0.000262754	yes			Fut10	Fut10	Fut10	chr8:31187331-31261483	KSR	ETP	OK	2.16342	3.26612	0.594266	-2.38581
											Ankrd54	5.62479	6.24658	6.2609	6.95758	6.24445	6.73805	7.23091	6.59981	7.0095			Kctd10	Kctd10	Kctd10	chr5:114314940-114380505	KSR	2i	OK	19.248	14.1841	-0.440433	4.24442	2.19159e-05	0.000269394	yes			Rg9mtd1	Rg9mtd1	Rg9mtd1	chr16:56033719-56037774	KSR	ETP	OK	28.7018	34.8588	0.280383	-2.38587
											Ankrd55	0.120285	0.324823	0	0	0	0.0424318	0	0	0.0946935			H2-D1	H2-D1	H2-D1	chr17:35263093-35267497	KSR	2i	OK	15.9293	10.1254	-0.6537	4.23779	2.25733e-05	0.00027719	yes			Wdfy1	Wdfy1	Wdfy1	chr1:79702261-79761769	KSR	ETP	OK	18.8591	23.4284	0.313003	-2.38514
											Ankrd6	1.93122	2.37826	2.37434	2.08727	2.20791	2.22453	3.08577	3.89821	3.74157			Fgd5	Fgd5	Fgd5	chr6:91987109-92076005	KSR	2i	OK	1.87952	0.85816	-1.13105	4.23743	2.26089e-05	0.000277341	yes			Zfp770	Zfp770	Zfp770	chr2:114193460-114201432	KSR	ETP	OK	8.04039	10.0767	0.32568	-2.38344
											Ankrd60	0	0	0	0	0	0	0	0	0			Glrx3	Glrx3	Glrx3	chr7:137437647-137468594	KSR	2i	OK	111.518	84.7806	-0.395474	4.23511	2.28435e-05	0.000279932	yes			4833442J19Rik	4833442J19Rik	4833442J19Rik	chr6:149141512-149151170	KSR	ETP	OK	5.09267	7.27355	0.514238	-2.38322
											Ankrd61	0	0.0562436	0.132742	0.180042	0.135326	0.153492	0.128322	0.124966	0.0669426			Fam100a	Fam100a	Fam100a	chr16:4874778-4879851	KSR	2i	OK	21.8161	14.0606	-0.633737	4.23398	2.29593e-05	0.000281063	yes			Omd	Omd	Omd	chr13:49464058-49652731	KSR	ETP	OK	21.2981	26.4591	0.313036	-2.38267
											Ankrd7	0	0	0	0	0	0	0	0	0			Glce	Glce	Glce	chr9:62057248-62070606	KSR	2i	OK	13.5799	10.0453	-0.434955	4.22631	2.37556e-05	0.000290514	yes			A130049A11Rik	A130049A11Rik	A130049A11Rik	chr3:103914119-104007491	KSR	ETP	OK	2.61552	3.72385	0.509699	-2.38203
											Ankrd9	2.91324	2.94789	3.03485	3.59554	3.02826	3.64117	3.01896	3.00724	3.14172			Zfp532	Zfp532	Zfp532	chr18:65580229-65689436	KSR	2i	OK	16.0273	12.1822	-0.395752	4.22463	2.39339e-05	0.000292395	yes			Rhobtb1	Rhobtb1	Rhobtb1	chr10:69208551-69291784	KSR	ETP	OK	2.99716	4.07593	0.443532	-2.3787
											Anks1	4.29567	4.47507	4.85902	3.76658	4.61687	4.38309	4.35685	5.14535	4.69728			Vmp1	Vmp1	Vmp1	chr11:86583864-86683822	KSR	2i	OK	34.1332	26.1918	-0.382057	4.22434	2.39638e-05	0.000292461	yes			Sumo2	Sumo2	Sumo2	chr11:115523108-115536230	KSR	ETP	OK	418.722	478.817	0.193483	-2.37817
											Anks1b	0.0161288	0.0779073	0.027298	0.0197282	0.0561978	0.0768398	0.110894	0.153453	0.101985			Uqcrh	Uqcrh	Uqcrh	chr4:116066964-116075070	KSR	2i	OK	257.157	321.426	0.321836	-4.22274	2.41351e-05	0.000294252	yes			E330016A19Rik	E330016A19Rik	E330016A19Rik	chr9:78430517-78443147	KSR	ETP	OK	1.24266	1.98232	0.673765	-2.37641
											Anks3	4.02686	5.12674	4.31181	3.91797	4.95917	4.24913	3.83167	3.8161	4.00719			Mcm3	Mcm3	Mcm3	chr1:20803013-20820213	KSR	2i	OK	143.485	173.282	0.272225	-4.22182	2.42341e-05	0.000295157	yes			Crls1	Crls1	Crls1	chr2:132846665-132866768	KSR	ETP	OK	20.5081	24.9129	0.280697	-2.37546
											Anks4b	0	0	0	0	0	0.0412162	0	0	0			Flnb	Flnb	Flnb	chr14:7817956-7951587	KSR	2i	OK	27.5808	22.3449	-0.303721	4.22154	2.42641e-05	0.000295222	yes			Yipf5	Yipf5	Yipf5	chr18:40204864-40219399	KSR	ETP	OK	26.5759	31.9443	0.265439	-2.37446
											Anks6	0.0403608	0.0844361	0.0333384	0	0.0695927	0	0.163891	0.181723	0.238892			Camk2n1	Camk2n1	Camk2n1	chr4:138455147-138460126	KSR	2i	OK	2.04069	3.80522	0.898928	-4.22105	2.43164e-05	0.000295556	yes			Raet1a	Raet1a	Raet1a	chr10:22158608-22374139	KSR	ETP	OK	2.72755	5.82938	1.09573	-2.37276
											Ankzf1	4.2471	4.01238	3.79526	4.20899	4.3269	5.06664	4.65698	4.07927	4.064			Map1lc3b	Map1lc3b	Map1lc3b	chr8:121590467-121598047	KSR	2i	OK	62.8914	79.7679	0.342946	-4.21741	2.47125e-05	0.000299761	yes			Brdt	Brdt	Brdt	chr5:107331193-107387058	KSR	ETP	OK	3.18536	4.88007	0.615446	-2.37226
											Anln	32.0457	36.3349	31.3917	32.757	33.3172	33.1744	37.1405	34.6772	34.904			Nr6a1	Nr6a1	Nr6a1	chr2:38723373-38926461	KSR	2i	OK	15.3236	18.3851	0.262779	-4.21762	2.46897e-05	0.000299761	yes			Pdzd4	Pdzd4	Pdzd4	chrX:73793356-73824969	KSR	ETP	OK	8.85465	11.0814	0.323628	-2.36963
											Ano1	0.452184	0.274295	0.293063	0.759861	0.998581	0.814554	0.533296	0.525285	0.535725			Cpn1	Cpn1	Cpn1	chr19:43956307-43986520	KSR	2i	OK	8.23028	4.32298	-0.928917	4.21674	2.47858e-05	0.000300345	yes			Acbd3	Acbd3	Acbd3	chr1:180726042-180754204	KSR	ETP	OK	13.3466	16.3448	0.29236	-2.36765
											Ano10	0.746596	0.815519	0.666081	1.3331	1.8285	1.57323	2.18332	1.79021	1.28412			Tmem59	Tmem59	Tmem59	chr4:107178629-107200996	KSR	2i	OK	83.2448	65.3187	-0.349864	4.21492	2.49869e-05	0.000302475	yes			Hmgb1	Hmgb1	Hmgb1	chr5:149047226-149053037	KSR	ETP	OK	337.514	384.991	0.189876	-2.36713
											Ano2	0.135093	0.139529	0.0907282	0.332564	0.40112	0.328566	0.40863	0.244581	0.307669			Stk17b	Stk17b	Stk17b	chr1:53755511-53785215	KSR	2i	OK	8.07549	5.17121	-0.64305	4.21324	2.51728e-05	0.000304256	yes			Syncrip	Syncrip	Syncrip	chr9:88449737-88482397	KSR	ETP	OK	90.8627	98.8827	0.12203	-2.36488
											Ano3	0.534048	0.470191	0.330404	0.514256	0.908485	0.746559	1.19226	1.15375	1.16851			Vat1l	Vat1l	Vat1l	chr8:114205639-114374070	KSR	2i	OK	1.33911	0.279895	-2.25832	4.21314	2.51849e-05	0.000304256	yes			Acadl	Acadl	Acadl	chr1:66830852-66863267	KSR	ETP	OK	14.3853	18.2964	0.34696	-2.36367
											Ano4	0	0.021507	0	0	0	0.0286031	0.0463159	0.0853074	0.048062			Spesp1	Spesp1	Spesp1	chr9:62270728-62282179	KSR	2i	OK	2.34064	0.844305	-1.47107	4.20982	2.55576e-05	0.000308447	yes			Igf1r	Igf1r	Igf1r	chr7:67952256-68233667	KSR	ETP	OK	2.09159	2.68368	0.359615	-2.36031
											Ano5	0	0	0	0	0.0321283	0	0.0104209	0.00943239	0.0331648			Hnrnpa0	Hnrnpa0	Hnrnpa0	chr13:58125878-58128556	KSR	2i	OK	102.505	125.093	0.287305	-4.20861	2.56948e-05	0.000309165	yes			Mical1	Mical1	Mical1	chr10:41476313-41487030	KSR	ETP	OK	7.92694	9.80139	0.306222	-2.36015
											Ano6	5.85779	6.26489	6.12912	7.0656	6.74221	6.58785	6.73435	7.64611	7.05925			Ucp2	Ucp2	Ucp2	chr7:100493344-100502173	KSR	2i	OK	56.6171	45.9212	-0.30208	4.20877	2.56761e-05	0.000309165	yes			Gm5141	Gm5141	Gm5141	chr13:62772199-62785808	KSR	ETP	OK	3.44467	4.79034	0.475762	-2.35844
											Ano7	0.0816834	0	0.0339714	0	0.0339833	0.0770636	0.0650526	0.178749	0.0999769			Xbp1	Xbp1	Xbp1	chr11:5520966-5525872	KSR	2i	OK	56.609	43.7859	-0.370565	4.20897	2.56537e-05	0.000309165	yes			Zfp61	Zfp61	Zfp61	chr7:24291045-24299549	KSR	ETP	OK	4.03357	5.73004	0.50649	-2.35703
											Ano8	1.51	2.02463	1.65811	1.86339	1.50047	1.88787	1.97051	1.99325	1.72433			Tuba1c	Tuba1c	Tuba1c	chr15:99029890-99038105	KSR	2i	OK	454.674	544.319	0.259617	-4.2081	2.57527e-05	0.00030955	yes			Mtrf1	Mtrf1	Mtrf1	chr14:79397771-79423650	KSR	ETP	OK	6.12943	8.48612	0.469352	-2.35717
											Ano9	3.70466	4.31254	4.57545	2.47521	2.88656	2.82872	3.66828	3.35955	3.51383			Nedd4	Nedd4	Nedd4	chr9:72662346-72749848	KSR	2i	OK	244.954	294.163	0.264106	-4.20731	2.58427e-05	0.00031032	yes			Shfm1	Shfm1	Shfm1	chr6:6558274-6578658	KSR	ETP	OK	179.344	211.93	0.240863	-2.35609
											Anp32a	110.275	123.391	112.245	88.6819	95.0873	99.1587	66.8731	65.9535	69.4771			Rap2b	Rap2b	Rap2b	chr3:61364506-61368703	KSR	2i	OK	11.6102	8.26147	-0.49092	4.20673	2.59087e-05	0.0003108	yes			Dusp11	Dusp11	Dusp11	chr6:85942268-85961667	KSR	ETP	OK	14.157	16.7349	0.241344	-2.35568
											Anp32b	223.23	261.146	223.935	208.16	231.691	248.11	259.831	261.568	251.094			E230016M11Rik	E230016M11Rik	E230016M11Rik	chr6:67035095-67080652	KSR	2i	OK	6.39338	3.06786	-1.05935	4.2053	2.60738e-05	0.000312468	yes			Esrrb	Esrrb	Esrrb	chr12:86361116-86521628	KSR	ETP	OK	121.273	138.443	0.191027	-2.35441
											Anp32e	63.4185	70.0901	66.3423	65.0484	62.3815	64.308	64.2999	61.5981	64.3569			Mitf	Mitf	Mitf	chr6:97807057-98021358	KSR	2i	OK	3.12343	4.98348	0.674023	-4.20448	2.61682e-05	0.000313285	yes			Mrps6	Mrps6	Mrps6	chr16:92058321-92112227	KSR	ETP	OK	38.6786	48.4522	0.325024	-2.34799
											Anpep	5.39619	4.71733	5.19813	6.75995	8.03753	7.95401	7.20393	8.47932	6.29005			Pcmtd1	Pcmtd1	Pcmtd1	chr1:7088919-7173628	KSR	2i	OK	10.2215	13.6358	0.415801	-4.20416	2.62055e-05	0.000313417	yes			Ccdc127	Ccdc127	Ccdc127	chr13:74350316-74365783	KSR	ETP	OK	12.2813	14.9524	0.283911	-2.34764
											Antxr1	0.421966	0.212019	0.425823	0.399885	0.377959	0.611693	0.891623	0.841287	0.692119			1110012J17Rik	1110012J17Rik	1110012J17Rik	chr17:66336981-66449750	KSR	2i	OK	16.6503	12.9604	-0.361438	4.20257	2.63902e-05	0.00031531	yes			Igf1	Igf1	Igf1	chr10:87859055-87937047	KSR	ETP	OK	0.478956	1.5331	1.67849	-2.34593
											Antxr2	0.245834	0	0	0.0757634	0.0794679	0.187061	0.102913	0.189193	0.0809513			Slc28a1	Slc28a1	Slc28a1	chr7:81114798-81170416	KSR	2i	OK	4.70556	7.75028	0.719883	-4.20086	2.65902e-05	0.000317382	yes			Zfp160	Zfp160	Zfp160	chr17:21008940-21028856	KSR	ETP	OK	3.46694	4.71017	0.442115	-2.34285
											Antxrl	0	0	0	0	0	0	0	0	0			Pou3f1	Pou3f1	Pou3f1	chr4:124657645-124660655	KSR	2i	OK	2.07618	0.586938	-1.82265	4.1926	2.75774e-05	0.000328837	yes			Ptcd3	Ptcd3	Ptcd3	chr6:71880637-71908762	KSR	ETP	OK	111.856	128.138	0.196052	-2.34222
											Anubl1	0.507412	0.481975	0.303411	0.658903	0.439847	0.604078	0.350384	0.535811	0.718029			B3gnt7	B3gnt7	B3gnt7	chr1:86303220-86307305	KSR	2i	OK	26.3488	19.5153	-0.43313	4.19198	2.76534e-05	0.000329414	yes			Tm9sf2	Tm9sf2	Tm9sf2	chr14:122107081-122159603	KSR	ETP	OK	64.8854	74.9528	0.208089	-2.3419
											Anxa1	3.26419	3.60664	3.0817	4.82348	5.37314	5.64968	12.535	12.6466	14.4009			Fam53c	Fam53c	Fam53c	chr18:34758905-34773760	KSR	2i	OK	17.2349	12.9891	-0.408029	4.18901	2.80175e-05	0.000333419	yes			Naa20	Naa20	Naa20	chr2:145903240-145916425	KSR	ETP	OK	71.9778	83.6313	0.216489	-2.33953
											Anxa10	0.0850435	0	0	0	0	0.0816999	0.0613656	0.0552616	0.06371			Timp1	Timp1	Timp1	chrX:20848542-20920918	KSR	2i	OK	21.1751	32.318	0.60997	-4.18822	2.81156e-05	0.000334254	yes			Mtap7d2	Mtap7d2	Mtap7d2	chrX:159414577-159498947	KSR	ETP	OK	5.39445	7.02118	0.380239	-2.33816
											Anxa11	40.0701	41.5511	41.6237	23.4344	26.5872	25.191	38.5525	39.6371	41.6091			Rad54b	Rad54b	Rad54b	chr4:11558919-11615808	KSR	2i	OK	9.281	13.5488	0.545818	-4.1863	2.83535e-05	0.000336748	yes			A930011O12Rik	A930011O12Rik	A930011O12Rik	chr14:64588114-64593961	KSR	ETP	OK	0.83617	1.45203	0.796204	-2.33706
											Anxa13	0	0.0573775	0	0	0.0719625	0.0803687	0.0662323	0.191458	0.0683688			Tgif1	Tgif1	Tgif1	chr17:70844204-70853532	KSR	2i	OK	115.389	99.9542	-0.207162	4.18471	2.85524e-05	0.000338773	yes			Spats2l	Spats2l	Spats2l	chr1:57774860-57948397	KSR	ETP	OK	0.884004	1.52775	0.78928	-2.33677
											Anxa2	4.03316	4.00152	4.09551	11.3555	10.8391	10.5161	28.8605	30.4141	26.4088			Ap4s1	Ap4s1	Ap4s1	chr12:51608540-51738939	KSR	2i	OK	17.271	10.0519	-0.780883	4.18376	2.86729e-05	0.000339865	yes			Ptpn3	Ptpn3	Ptpn3	chr4:57190840-57301837	KSR	ETP	OK	6.46044	7.9337	0.296363	-2.33703
											Anxa3	1.85446	2.52496	2.638	2.99177	2.74715	3.31641	9.16387	8.94618	9.44169			Lrig3	Lrig3	Lrig3	chr10:125966218-126015359	KSR	2i	OK	7.03126	4.51057	-0.640473	4.18186	2.89131e-05	0.000342372	yes			Zmat3	Zmat3	Zmat3	chr3:32334793-32367438	KSR	ETP	OK	14.7986	17.3517	0.229618	-2.33576
											Anxa4	11.7783	12.2114	14.7149	9.13311	8.47357	8.15863	11.9818	12.5598	10.8387			1810022K09Rik	1810022K09Rik	1810022K09Rik	chr3:14578670-14611256	KSR	2i	OK	208.266	268.243	0.365114	-4.17713	2.95206e-05	0.00034922	yes			Zfp800	Zfp800	Zfp800	chr6:28239930-28261601	KSR	ETP	OK	3.50182	4.75454	0.4412	-2.3344
											Anxa5	12.9253	15.1364	13.0007	10.9154	12.0196	11.272	13.6084	16.494	14.0142			Sh3gl3	Sh3gl3	Sh3gl3	chr7:82260128-82307417	KSR	2i	OK	10.1981	5.43781	-0.907198	4.17645	2.96088e-05	0.000349917	yes			Rbm27	Rbm27	Rbm27	chr18:42275352-42341540	KSR	ETP	OK	20.6978	24.1305	0.221375	-2.33346
											Anxa6	24.9263	23.8147	22.7479	13.2914	15.3294	14.1719	21.2329	23.5281	23.5826			Nfkb1	Nfkb1	Nfkb1	chr3:135584654-135691547	KSR	2i	OK	13.9472	10.1315	-0.46113	4.17591	2.96794e-05	0.000350404	yes			Bcas1	Bcas1	Bcas1	chr2:170346990-170427845	KSR	ETP	OK	1.57281	2.52278	0.681668	-2.33282
											Anxa7	28.7478	31.7036	30.3651	19.3199	19.4491	20.1626	25.5342	25.6485	25.5696			Myadm	Myadm	Myadm	chr7:3289037-3299349	KSR	2i	OK	50.9671	59.9794	0.234901	-4.17187	3.02105e-05	0.000356323	yes			Fundc2	Fundc2	Fundc2	chrX:75382398-75397158	KSR	ETP	OK	14.9292	18.108	0.278486	-2.33228
											Anxa8	1.01893	1.88682	1.51834	3.23151	2.8863	2.78383	2.52001	3.39833	2.68038			Lpcat4	Lpcat4	Lpcat4	chr2:112239840-112247111	KSR	2i	OK	8.83667	4.86344	-0.861527	4.17062	3.03776e-05	0.00035794	yes			Vps4b	Vps4b	Vps4b	chr1:106770787-106796725	KSR	ETP	OK	31.9826	37.5344	0.230926	-2.33061
											Anxa9	0.316484	0.218245	0.463594	0.276326	0.24716	0.229289	0.148888	0.137626	0.151126			Trim43a	Trim43a	Trim43a	chr9:88581035-88588819	KSR	2i	OK	2.25008	0.284979	-2.98105	4.16676	3.08964e-05	0.000363695	yes			1600014C10Rik	1600014C10Rik	1600014C10Rik	chr7:38183216-38197565	KSR	ETP	OK	2.3312	3.41002	0.548709	-2.32993
											Aoah	3.66615	4.18149	3.66354	0.825421	0.801704	0.916108	2.92027	2.36181	2.86433			Mical1	Mical1	Mical1	chr10:41476313-41487030	KSR	2i	OK	7.81596	11.099	0.505933	-4.16616	3.09771e-05	0.000364286	yes			Fam53a	Fam53a	Fam53a	chr5:33600352-33629635	KSR	ETP	OK	11.7473	15.1299	0.365068	-2.32621
											Aoc2	0.517568	0.74569	0.445104	1.40609	2.16877	1.22623	0.568435	1.05757	0.602476			Hnrnph1	Hnrnph1	Hnrnph1	chr11:50377718-50386528	KSR	2i	OK	140.223	169.695	0.275223	-4.16504	3.11302e-05	0.000365727	yes			Cfdp1	Cfdp1	Cfdp1	chr8:111768472-111854310	KSR	ETP	OK	145.6	167.949	0.206018	-2.32477
											Aoc3	0.000462025	0.000215396	0.0221433	0.0662209	0.0697202	0.051895	0.151123	0.100528	0			Rxra	Rxra	Rxra	chr2:27677200-27763319	KSR	2i	OK	6.28942	4.19385	-0.584651	4.16042	3.17659e-05	0.000372572	yes			Dpy19l1	Dpy19l1	Dpy19l1	chr9:24411778-24503140	KSR	ETP	OK	20.0484	23.6373	0.237581	-2.32443
											Aox1	0.156905	0.0828743	0.0749504	0.080159	0.115628	0.0449603	0.167642	0.154083	0.174572			Ubr3	Ubr3	Ubr3	chr2:69897245-70024013	KSR	2i	OK	16.1514	13.6704	-0.240605	4.16036	3.17753e-05	0.000372572	yes			Ttpal	Ttpal	Ttpal	chr2:163602313-163619013	KSR	ETP	OK	3.24533	4.32213	0.413376	-2.32335
											Aox3	1.29413	1.39552	1.24611	0.147368	0.147432	0.147141	0.26567	0.207373	0.3976			Gm5523	Gm5523	Gm5523	chr1:13785684-13786929	KSR	2i	OK	189.233	231.34	0.289853	-4.15948	3.18978e-05	0.000373642	yes			Cspg5	Cspg5	Cspg5	chr9:110243782-110262576	KSR	ETP	OK	2.22455	3.23025	0.53813	-2.32238
											Aox3l1	0.022954	0	0	0	0	0	0	0.0173494	0			Gapdh	Gapdh	Gapdh	chr6:125161851-125165583	KSR	2i	OK	1962.97	2370.05	0.271873	-4.15725	3.22101e-05	0.000376931	yes			Slc44a1	Slc44a1	Slc44a1	chr4:53440412-53622478	KSR	ETP	OK	22.6997	26.4057	0.218179	-2.32196
											Aox4	0.102832	0.136842	0.102103	0.0503037	0.107324	0.0633063	0.206713	0.263448	0.337553			Kras	Kras	Kras	chr6:145216698-145250231	KSR	2i	OK	20.5586	26.1607	0.347661	-4.15696	3.22505e-05	0.000377035	yes			Braf	Braf	Braf	chr6:39603236-39725463	KSR	ETP	OK	8.69317	10.2817	0.242123	-2.31816
											Ap1ar	16.3269	16.0221	16.9105	19.8058	18.1167	22.353	17.6027	17.2157	16.1986			Gfpt2	Gfpt2	Gfpt2	chr11:49794154-49838620	KSR	2i	OK	25.7015	33.3502	0.375839	-4.15578	3.24179e-05	0.000378621	yes			Zfp36l1	Zfp36l1	Zfp36l1	chr12:80107759-80113013	KSR	ETP	OK	44.6201	52.053	0.222288	-2.317
											Ap1b1	21.6601	23.6567	22.8823	20.1745	23.7864	22.4732	21.4457	22.4784	24.0308			Psmb9	Psmb9	Psmb9	chr17:34182098-34187330	KSR	2i	OK	5.5627	0.996945	-2.4802	4.15399	3.2673e-05	0.000381227	yes			Cbs	Cbs	Cbs	chr17:31612643-31637141	KSR	ETP	OK	9.96199	12.6118	0.340272	-2.3168
											Ap1g1	15.8408	18.1383	17.8201	19.945	20.7886	21.5618	19.1949	18.5204	18.7417			Plk3	Plk3	Plk3	chr4:117126812-117133952	KSR	2i	OK	17.4737	12.0988	-0.530315	4.15277	3.28476e-05	0.000382891	yes			Pfdn4	Pfdn4	Pfdn4	chr2:170482964-170519070	KSR	ETP	OK	56.1325	68.1975	0.280884	-2.31438
											Ap1g2	6.54114	6.62232	7.63758	3.79025	5.30067	5.19016	4.5106	4.52328	5.06866			Nuak1	Nuak1	Nuak1	chr10:84371318-84440471	KSR	2i	OK	3.90561	2.31792	-0.752719	4.15092	3.31136e-05	0.000385615	yes			Rnmtl1	Rnmtl1	Rnmtl1	chr11:76243735-76250622	KSR	ETP	OK	9.13456	12.304	0.429719	-2.30469
											Ap1m1	24.6128	24.6762	25.6165	20.5899	20.3403	22.0622	23.1307	22.7979	22.6206			Mak16	Mak16	Mak16	chr8:31150315-31168724	KSR	2i	OK	111.451	90.1577	-0.305888	4.1504	3.31892e-05	0.00038612	yes			Zfyve21	Zfyve21	Zfyve21	chr12:111814169-111828388	KSR	ETP	OK	22.3062	28.1092	0.333597	-2.30483
											Ap1m2	1.996	1.80784	1.56211	2.41762	1.83287	2.52676	4.84638	4.93926	5.71459			Sh3bp5	Sh3bp5	Sh3bp5	chr14:31373963-31436033	KSR	2i	OK	1.83916	0.386364	-2.25102	4.1469	3.37011e-05	0.000391693	yes			Sept10	Sept10	Sept10	chr10:59141626-59221847	KSR	ETP	OK	15.8064	19.1337	0.275607	-2.30132
											Ap1s1	48.4477	45.5728	45.4221	35.6797	37.6051	33.0536	42.5159	41.64	43.7423			Atxn10	Atxn10	Atxn10	chr15:85336380-85463836	KSR	2i	OK	141.244	116.323	-0.280058	4.14439	3.40722e-05	0.000395622	yes			Brwd3	Brwd3	Brwd3	chrX:108742207-108834355	KSR	ETP	OK	4.06434	5.13296	0.33677	-2.30013
											Ap1s2	5.81211	6.15963	5.77711	5.8267	5.42303	6.8273	6.0168	6.10366	6.2078			Junb	Junb	Junb	chr8:84976908-84978748	KSR	2i	OK	15.8984	10.201	-0.64018	4.14309	3.42665e-05	0.000397491	yes			Tro	Tro	Tro	chrX:150645302-150657436	KSR	ETP	OK	5.90242	7.30529	0.307634	-2.29977
											Ap1s3	10.9509	15.8772	11.0738	8.72814	8.07416	9.16103	15.2621	16.6329	16.7059			Gatm	Gatm	Gatm	chr2:122594472-122611277	KSR	2i	OK	1.94848	0.328841	-2.56689	4.14262	3.43368e-05	0.000397921	yes			Snx18	Snx18	Snx18	chr13:113592178-113618564	KSR	ETP	OK	24.0289	28.1643	0.229096	-2.29637
											Ap2a1	53.0286	54.1577	55.0864	41.9681	49.9232	50.0553	49.0866	52.5842	50.2108			Grip1	Grip1	Grip1	chr10:119454313-120075593	KSR	2i	OK	1.96605	0.602363	-1.7066	4.14097	3.4584e-05	0.000400397	yes			Fam81a	Fam81a	Fam81a	chr9:70089309-70141557	KSR	ETP	OK	12.6053	15.5779	0.305468	-2.29543
											Ap2a2	26.5622	26.7594	27.3398	26.8456	27.1039	27.2249	29.6083	31.2387	29.3274			Pcx	Pcx	Pcx	chr19:4510471-4621752	KSR	2i	OK	11.6685	8.58202	-0.443227	4.13661	3.52474e-05	0.000407683	yes			Junb	Junb	Junb	chr8:84976908-84978748	KSR	ETP	OK	16.1187	20.4833	0.345716	-2.29337
											Ap2b1	24.4679	27.2197	25.0863	24.0131	25.419	27.1135	28.0055	28.7693	27.7585			Gm5069	Gm5069	Gm5069	chr1:180326968-180423659	KSR	2i	OK	59.9039	73.3109	0.291377	-4.1324	3.58992e-05	0.000414419	yes			Fam108b	Fam108b	Fam108b	chr19:21653308-21685637	KSR	ETP	OK	14.9935	18.6053	0.311377	-2.29312
											Ap2m1	123.277	125.775	129.004	104.84	117.441	110.091	155.397	154.655	147.023			Luc7l2	Luc7l2	Luc7l2	chr6:38551443-38609470	KSR	2i	OK	50.129	58.9238	0.233205	-4.13248	3.58867e-05	0.000414419	yes			Fam177a	Fam177a	Fam177a	chr12:55124527-55142082	KSR	ETP	OK	12.3461	14.9777	0.278759	-2.2932
											Ap2s1	86.373	75.0163	76.4232	67.2688	71.0007	74.1773	73.1289	73.1479	68.2368			Pck2	Pck2	Pck2	chr14:55540265-55550017	KSR	2i	OK	24.3381	31.3258	0.364134	-4.12578	3.69484e-05	0.000426119	yes			Pms1	Pms1	Pms1	chr1:53189188-53296996	KSR	ETP	OK	9.79425	12.2654	0.324582	-2.29281
											Ap3b1	25.1311	29.4489	28.9901	24.2594	27.5514	26.1277	30.9642	32.2316	30.6491			Cobl	Cobl	Cobl	chr11:12236675-12464960	KSR	2i	OK	34.0817	41.9139	0.298432	-4.12528	3.70286e-05	0.000426632	yes			Homez	Homez	Homez	chr14:54852736-54864158	KSR	ETP	OK	1.53533	2.16038	0.492739	-2.29089
											Ap3b2	0.816334	1.36269	1.10364	0.3558	0.417012	0.486	0.572472	0.731961	0.661541			Gm5128	Gm5128	Gm5128	chrX:135373283-135383393	KSR	2i	OK	13.9623	10.1867	-0.454862	4.12404	3.72277e-05	0.000428513	yes			Arf4	Arf4	Arf4	chr14:26638196-26657258	KSR	ETP	OK	106.766	122.665	0.200273	-2.291
											Ap3d1	21.5961	24.0606	22.3521	22.5946	24.4171	25.2057	23.913	25.7568	23.0384			Ints8	Ints8	Ints8	chr4:11191353-11254259	KSR	2i	OK	18.7232	23.1663	0.3072	-4.12311	3.73787e-05	0.000429837	yes			Pdia3	Pdia3	Pdia3	chr2:121413901-121438686	KSR	ETP	OK	259.185	294.13	0.18247	-2.29088
											Ap3m1	18.2688	20.9438	18.7109	21.2974	20.2246	22.3956	19.3117	18.5952	20.035			Ankrd10	Ankrd10	Ankrd10	chr8:11611582-11635754	KSR	2i	OK	28.5924	35.6557	0.318503	-4.12149	3.76425e-05	0.000432454	yes			Fam111a	Fam111a	Fam111a	chr19:12573524-12596566	KSR	ETP	OK	8.55316	10.7418	0.328712	-2.29049
											Ap3m2	1.53602	1.49056	1.58986	0.479091	0.874845	0.97252	1.48562	1.82445	1.35584			Arntl2	Arntl2	Arntl2	chr6:146805529-146832646	KSR	2i	OK	4.09267	1.50364	-1.44458	4.11811	3.81989e-05	0.000438425	yes			Eefsec	Eefsec	Eefsec	chr6:88257333-88446539	KSR	ETP	OK	15.6372	19.1895	0.295337	-2.29036
											Ap3s1	23.7824	21.5262	23.5968	25.0225	24.4995	20.9103	17.4923	17.6787	21.5781			Efr3b	Efr3b	Efr3b	chr12:3962553-4038915	KSR	2i	OK	1.60768	0.763171	-1.07491	4.11745	3.83085e-05	0.000439261	yes			Ptpmt1	Ptpmt1	Ptpmt1	chr2:90910712-90918050	KSR	ETP	OK	20.5363	25.9996	0.340311	-2.29013
											Ap3s2	8.71601	9.66455	9.5041	9.43773	9.56795	10.4589	9.31355	9.04319	8.99353			Tmem92	Tmem92	Tmem92	chr11:94777216-94782703	KSR	2i	OK	3.07491	1.09007	-1.49613	4.11624	3.85104e-05	0.000441153	yes			Arfip1	Arfip1	Arfip1	chr3:84496063-84582625	KSR	ETP	OK	15.1956	18.5048	0.284243	-2.28994
											Ap4b1	4.31908	5.22627	4.64221	4.75752	5.44522	5.2378	5.16691	4.54381	4.9197			Atp6v0c	Atp6v0c	Atp6v0c	chr17:24163864-24169429	KSR	2i	OK	32.7021	14.7235	-1.15126	4.11199	3.92261e-05	0.00044892	yes			Cenpq	Cenpq	Cenpq	chr17:40923054-40934551	KSR	ETP	OK	19.5582	24.5944	0.330557	-2.28949
											Ap4e1	3.76698	4.99201	4.68753	4.31556	5.13924	5.29727	3.61433	4.09524	4.38866			Rif1	Rif1	Rif1	chr2:52072836-52122381	KSR	2i	OK	52.7657	43.8251	-0.267843	4.10963	3.96301e-05	0.00045311	yes			E430025E21Rik	E430025E21Rik	E430025E21Rik	chr15:59331996-59374152	KSR	ETP	OK	43.0322	49.7626	0.209648	-2.28846
											Ap4m1	9.77209	10.4382	10.2869	9.55339	11.559	9.82622	11.4455	10.7666	11.7927			Nme7	Nme7	Nme7	chr1:164307674-164458355	KSR	2i	OK	25.912	34.999	0.433695	-4.10865	3.97976e-05	0.000454591	yes			Adnp2	Adnp2	Adnp2	chr18:80127134-80151482	KSR	ETP	OK	18.3094	21.7478	0.248287	-2.28758
											Ap4s1	7.22614	8.38031	9.18766	20.7686	19.6834	17.2193	14.2935	14.7093	11.5841			Ptms	Ptms	Ptms	chr6:124913674-124917946	KSR	2i	OK	163.296	201.396	0.302552	-4.10639	4.01883e-05	0.000458615	yes			Zfp862	Zfp862	Zfp862	chr6:48504338-48534832	KSR	ETP	OK	1.23318	1.78662	0.534846	-2.2872
											Apaf1	6.87057	7.64699	7.1447	6.49578	7.21143	8.45673	8.95043	9.28129	9.5012			Mcm6	Mcm6	Mcm6	chr1:128331590-128359656	KSR	2i	OK	128.343	154.559	0.268152	-4.10361	4.06755e-05	0.000463732	yes			Hist1h1c	Hist1h1c	Hist1h1c	chr13:23738806-23740367	KSR	ETP	OK	13.5261	17.6	0.379829	-2.28707
											Apba1	0.0494988	0.0488619	0.070049	0.149186	0.0439633	0.0347893	0.0824397	0.0859123	0.116162			Pramel3	Pramel3	Pramel3	chrX:135302315-135312636	KSR	2i	OK	9.87209	6.80702	-0.536331	4.10227	4.09118e-05	0.000465981	yes			Galk2	Galk2	Galk2	chr2:125859217-126146251	KSR	ETP	OK	9.83059	12.5404	0.351232	-2.28619
											Apba2	0.533771	0.381052	0.496635	1.55743	1.57214	1.34938	1.06084	0.919045	1.20958			Dppa3	Dppa3	Dppa3	chr6:122626423-122630271	KSR	2i	OK	5.79964	1.26257	-2.1996	4.09935	4.14311e-05	0.000471391	yes			Dad1	Dad1	Dad1	chr14:54235484-54253929	KSR	ETP	OK	116.474	137.917	0.243794	-2.28508
											Apba3	17.3021	16.1895	18.9517	15.6776	19.1569	18.7133	20.425	21.3591	19.4871			Mdc1	Mdc1	Mdc1	chr17:35841497-35859670	KSR	2i	OK	16.6219	20.8262	0.325318	-4.09916	4.14657e-05	0.000471391	yes			Zfp280c	Zfp280c	Zfp280c	chrX:48541625-48594452	KSR	ETP	OK	6.48494	7.95925	0.295538	-2.28444
[truncated: 22,695 more rows]
[truncated: 45 more columns]

## Sheet: Ex Data Fig 3G
Fig S3G	qPCR mouse pluripotency markers
		Nanog									vs GAPDH
			rep1	rep2	rep3	rep4		Mean	Std Dev		Mean	Std Dev			Mean	Std Dev			T-test		Serum/LIF 3 reps	2i-naive: 3 reps	CDK8/19i: 3 reps
[truncated: 67 more rows]

## Sheet: Ex Data Fig 3H
Fig S3H	RNAseq FPKM data and calculations for mouse LINE L1 super-family in Extended Data Figure 3H												Extended Data Figure 3H: LINE L1 calculations: The mouse endogenous LINE L1 viral super-family expression data was selected from Supplementary Table 2, Section#10 for further analysis. The mean and standard deviation for each viral sub-family was calculated (columns N – AN). Next, viral families were selected, grouped, and summed (columns AP-BC), and then arranged in order of evolutionary history…
[truncated: 111 more rows]
[truncated: 18 more columns]

[truncated: 4 more sheets: Ex Data Fig 3i, Ex Data Fig 3K, Ex Data Fig 3L, Ex Data Fig 3M]
