# Supplementary material for: Global hyperactivation of enhancers stabilizes human and mouse naive pluripotency through inhibition of CDK8/19 Mediator kinases
Source: Springer Nature journal article supplement (doi:10.1038/s41556-020-0573-1), 2020-09-28
Supplement: MOESM21 [file 41556_2020_573_MOESM21_ESM.xlsx]

## Sheet: Ex Data Fig 4A
Fig S4A	FACS for MERVL 2C-state reporter cell line recovery after CDK8/19i-withdrawal
	MERVL-Tomato 2C reporter
	%cells 2C-Tomato-High
	Control	0.163	0.147	0.202
	2i-naïve	0.085	0.045	0.049
	CDK8/19i	0.003	0.004	0.009
	48h after CDK8/19i withdrawal	0.05	0.096	0.112
	10days after CDK8/19i withdrawal	0.185	0.222	0.189
		Expt1	Expt2	Expt3

## Sheet: Ex Data Fig 4B
Fig S4B	FACS for Zscan4 2C-state reporter cell line recovery after CDK8/19i-withdrawal
	Zscan4C-GFP 2C reporter
	%cells 2C-GFP-High
	Control	0.049	0.065	0.087
	2i-naïve	0.028	0.04	0.025
	CDK8/19i	0.009	0.004	0.005
	48h after CDK8/19i withdrawal	0.026	0.032	0.019
	10days after CDK8/19i withdrawal	0.056	0.082	0.076
		Expt1	Expt2	Expt3

## Sheet: Ex Data Fig 4D+4E
Fig S4D + 4E	A table of published mouse embryonic stem cells datasets used in this study for comparisons found in Figure 4E and Extended Data 4D,E
Source Data Ex Data Fig 4E: A table of published mouse embryonic stem cells datasets used in this study for comparisons found in Figure 4E and Extended Data 4D,E
			Reference in current study
				Dataset	Accession number	Processed data	PRIMED	NAÏVE
			50	Buecker et al 2014	GSE56138	Table S1	1xEpiLC	1xESC
			23	Marks et al 2012	GSE23943	Table S2	3xSerum	3x2i
			51	Bulut et al 2016	GSE81285	Table S2	2xSerum	2x2i
			49	Fidalgo et al 2016	GSE81045	-	2xSerum/LIF	2x2i_48h
			49	Fidalgo et al 2016	GSE81045	-	2xSerum/LIF	2ix2i_16d
			48	Kolodziejczyk et al 2015	E-MTAB-2600	http://www.ebi.ac.uk/teichmann-srv/espresso/	250x Serum/LIF	295x 2i and 159x a2i

## Sheet: Ex Data Fig 4F
Fig S4F	Human qPCRs for pluripotency markers
	NANOG										vs GAPDH			NANOG vs GAPDH
		rep1	rep2	rep3			Mean	Std Dev			Mean	Std Dev			Mean	Std Dev
	Primed 1	24.582	23.967	23.779			24.1093	0.419996		Primed 1	28.9894	0.505009		Primed	32.6056	5.11409
	Primed 2	24.643	24.529	24.48			24.5507	0.0836322		Primed 2	36.2218	0.12339		2ip38i	811.157	107.653
	CDK8/19i 1	20.805	20.603	20.482			20.63	0.163184		CDK8/19i 1	1091.26	8.63193		CDK8/19i	779.35	305.686
	CDK8/19i 2	20.842	20.814	21.177			20.9443	0.201982		CDK8/19i 2	766.488	7.3918
	CDK8/19i3	21.111	20.966	22.483			21.52	0.837128		CDK8/19i3	480.298	18.6836
	2ip38i 1	24.7	24.685	24.704			24.6963	0.0100173		2ip38i 1	909.408	0.368872
	2ip38i 2	23.926	23.833	23.665			23.808	0.132284		2ip38i 2	827.979	4.60047
	2ip38i 3	22.56	22.485	22.475			22.5067	0.0464573		2ip38i 3	696.084	1.43683
	POU5F1										vs GAPDH			POU5F1 vs GAPDH
		rep1	rep2	rep3			Mean	Std Dev			Mean	Std Dev			Mean	Std Dev
	Primed 1	27.671	27.518	27.779			27.656	0.131145		Primed 1	2.48076	0.0117638		Primed	2.34493	0.192104
	Primed 2	28.508	28.629	28.621			28.586	0.0676686		Primed 2	2.20909	0.00522934		2ip38i	145.372	72.0868
	Primed 3	26.495	26.594	26.62			26.5697	0.0659569		Primed 3	8.41784	0.0208966		CDK8/19i	433.367	113.105
	CDK8/19i 1	22.281	22.26	22.229			22.2567	0.0261598		CDK8/19i 1	353.39	0.415364
	CDK8/19i 2	21.489	21.54	21.539			21.5227	0.0291604		CDK8/19i 2	513.345	0.695516
	2ip38i 1	26.825	26.929	26.988			26.914	0.0825288		2ip38i 1	195.512	0.599518
	2ip38i 2	26.288	25.891	25.902			26.027	0.226099		2ip38i 2	177.842	1.54493
	2ip38i 3	24.176	25.054	28.704			25.978	2.40126		2ip38i 3	62.7604	5.80121
	KLF4										vs GAPDH			KLF4 vs GAPDH
		rep1	rep2	rep3			Mean	Std Dev			Mean	Std Dev			Mean	Std Dev
	Primed 1	29.442	29.058	28.967			29.1557	0.252112		Primed 1	0.877285	0.00758597		Primed	0.724376	0.431706
	Primed 2	29.588	29.177	30.176			29.647	0.502107		Primed 2	1.05882	0.0179323		2ip38i	1.27234	0.548377
	Primed 3	31.63	32.044	31.486			31.72	0.289682		Primed 3	0.237026	0.00216463		CDK8/19i	10.476	2.19848
	CDK8/19i 1	27.215	27.112	26.91			27.079	0.155155		CDK8/19i 1	12.4907	0.0715682
	CDK8/19i 2	26.931	27.253	27.094			27.0927	0.161004		CDK8/19i 2	10.8062	0.0642182
	CDK8/19i3	27.546	27.36	27.307			27.4043	0.125516		CDK8/19i3	8.13111	0.0372418
	2ip38i 1	32.851	33.981	34.195			33.6757	0.722152		2ip38i 1	1.80181	0.0386387
	2ip38i 2	33.532	34.554	33.92			34.002	0.515911		2ip38i 2	0.706838	0.0107248
	2ip38i 3	31.937	31.394	31.355			31.562	0.325345		2ip38i 3	1.30838	0.013487
	E-cad										vs GAPDH			E-cad vs GAPDH
		rep1	rep2	rep3			Mean	Std Dev			Mean	Std Dev			Mean	Std Dev
	Primed 1	34.742	36.895	37.053			36.23	1.29107		Primed 1	0.0065096	0.000231971		Primed	0.00780807	0.00183632
	Primed 2	36.887	36.059	36.579			36.5083	0.4185		Primed 2	0.00910654	0.00010439		2ip38i	3.92838	1.03015
	CDK8/19i 1	25.56	25.635	25.562			25.5857	0.0427358		CDK8/19i 1	35.1662	0.0587382		CDK8/19i	35.1662	0.0587382
	2ip38i 1	32.732	33.267	32.71			32.903	0.315425		2ip38i 1	3.07827	0.0295098
	2ip38i 2	31.454	31.749	31.718			31.6403	0.162112		2ip38i 2	3.63289	0.0186134
	2ip38i 3	30.417	28.899	29.504			29.6067	0.76419		2ip38i 3	5.07398	0.130967
	Nestin										vs GAPDH			NESTIN vs GAPDH
		rep1	rep2	rep3			Mean	Std Dev			Mean	Std Dev			Mean	Std Dev
	Primed 1	23.503	23.755	23.309			23.5223	0.223627		Primed 1	43.5455	0.413988		Primed	51.3439	11.0286
	Primed 2	23.718	24.079	23.733			23.8433	0.204231		Primed 2	59.1423	0.506586		2ip38i	6.7002	1.69607
	CDK8/19i 1	27.383	27.518	27.385			27.4287	0.0773713		CDK8/19i 1	9.80228	0.0276505		CDK8/19i	9.80228	0.0276505
	2ip38i 1	31.581	32.101	31.826			31.836	0.260145		2ip38i 1	6.44919	0.052699
	2ip38i 2	31.294	31.506	30.616			31.1387	0.464889		2ip38i 2	5.14362	0.0767924
	2ip38i 3	28.911	28.988	28.684			28.861	0.158048		2ip38i 3	8.50778	0.0465901
	N-Cadherin										vs GAPDH			NESTIN vs GAPDH
		rep1	rep2	rep3			Mean	Std Dev			Mean	Std Dev			Mean	Std Dev
	Primed 1	21.487	21.535	21.603			21.5417	0.0582872		Primed 1	171.863	0.465026		Primed	143.099	40.679
	Primed 2	24.304	22.124	22.249			22.8923	1.22414		Primed 2	114.335	6.11388		2ip38i	42.7146	14.2347
	CDK8/19i 1	25.686	25.315	25.098			25.3663	0.297343		CDK8/19i 1	40.9403	0.4799		CDK8/19i	40.9403	0.4799
	2ip38i 1	29.893	28.608	28.987			29.1627	0.660265		2ip38i 1	41.1395	0.931429
	2ip38i 2	29.977	27.891	28.013			28.627	1.17072		2ip38i 2	29.333	1.19959
	2ip38i 3	25.99	26.101	26.209			26.1	0.109503		2ip38i 3	57.6714	0.241962
	GAPDH
		rep1	rep2	rep3			Mean	Std Dev
	Primed 1	18.947	19.036	19.02			19.001	0.0474443
	Primed 2	19.764	19.784	19.743			19.7637	0.0205022
	Primed 3	19.695	19.61	19.727			19.6773	0.0604669
	CDK8/19i 1	20.906	20.717	20.645			20.756	0.1348
	CDK8/19i 2	20.679	20.547	20.456			20.5607	0.112127
	CDK8/19i3	20.426	20.537	20.423			20.462	0.0649693
	2ip38i 1	24.452	24.642	24.584			24.5593	0.0973724
	2ip38i 2	23.504	23.596	23.507			23.5357	0.0522722
	2ip38i 3	21.859	22.036	22.057			21.984	0.108761

## Sheet: Ex Data Fig 4G
Fig S4G	Human Embryo Marker genes
								Blakely et al., 2013				T-Tests
	Human embryo markers were defined in References (59, 79,81). Below, summary. On Right the Source data of gene expression for these genes lists							Yan et al., 2015				Unpaierd
								Pastor et al., 2016				Two-tailed								A set of putative marker genes for the human in vivo naïve pre-implantation epiblast were previously reported (Pastor et al., 2016; Reference 39). Here, the expression of these putative naïve marker genes is listed for the indicated conditions in the current study, and is shown in Extended Data Figure 4G.																								A set of putative marker genes for the human in vivo post-implantation primed state epiblast were previously reported (Pastor et al., 2016; Reference 39). Here, the expression of these putative marker genes is listed for the indicated conditions in the current study and is shown in Extended Data Figure 4G.
	A set of putative marker genes for the human in vivo pre-implantation naive epiblast, OR, post-implantation primed state epiblast, were previously reported (Pastor et al., 2016). Here, the expression of these putative marker genes is listed for the indicated conditions in the current study and is shown in Figure S4G.											Pre-implantation naïve markers		Post-implantation primed markers
																P-value	Significant?
																				HUMAN_PREIMPLANTATION_EPIBLAST_SPECIFIC_GENES_N242_N190detected here	LOCUS	START	END	PRIMED_A	X2IP	X2IP_LOG2.FOLD_CHANGE.	X2IP_Q_VALUE	X2IP_SIGNIFICANT	X2IP_STATUS	PRIMED_B	X8IP	X8IP_LOG2.FOLD_CHANGE.	X8IP_Q_VALUE	X8IP_SIGNIFICANT	X8IP_STATUS	PRIMED_C	X8IONLY	X8IONLY_LOG2.FOLD_CHANGE.	X8IONLY_Q_VALUE	X8IONLY_SIGNIFICANT	X8IONLY_STATUS			PRIMED_HESC.SPECIFIC_GENES_N620_N538detected here	LOCUS	START	END	PRIMED_A	X2IP
												2ip38i	vs	2ip38i		P<0,0001	yes			A4GALT	CHR22	43069507	43116901	9.87431	79.2469	3.0046	0.000821971	YES	OK	9.87431	49.4346	2.32377	0.000821971	YES	OK	9.87431	69.8449	2.8224	0.000821971	YES	OK			FEZ1	CHR11	125307120	125366206	70.7708	21.5045
												8ip38i	vs	8ip38i		P<0,0001	yes			ABCB8	CHR7	150725509	150744869	8.06736	19.0915	1.24276	0.00503443	YES	OK	8.06736	14.4218	0.83808	0.090711	NO	OK	8.06736	15.6666	0.957526	0.0653241	NO	OK			BST2	CHR19	17513754	17516384	119.865	2.85026
	HUMAN_PREIMPLANTATION_EPIBLAST_SPECIFIC_GENES_N242_N190detected here					PRIMED_HESC.SPECIFIC_GENES_N620_N538detected here						8i_ONLY	vs	8i_ONLY		P<0,0001	yes			ABR	CHR17	906731	1133074	13.3989	10.3123	-0.377742	0.466073	NO	OK	13.3989	8.31573	-0.688199	0.146148	NO	OK	13.3989	9.43643	-0.505801	0.403986	NO	OK			CRABP1	CHR15	78632665	78640572	790.233	87.9225
																				ACADS	CHR12	121163570	121177811	9.33053	13.348	0.516594	0.334445	NO	OK	9.33053	14.7856	0.664163	0.141617	NO	OK	9.33053	15.8428	0.763791	0.10449	NO	OK			EGR1	CHR5	137800933	137815373	57.2681	0.562258
																				ACOT11	CHR1	55013806	55100417	0.700719	4.56573	2.70394	0.000821971	YES	OK	0.700719	3.60433	2.36282	0.000821971	YES	OK	0.700719	5.30124	2.91942	0.000821971	YES	OK			BLCAP	CHR20	36145818	36171617	1417.67	109.129
												8i = CDK8/19i								ACSL4	CHRX	108884559	108976622	17.7627	20.4081	0.20029	0.729259	NO	OK	17.7627	23.0544	0.376193	0.383519	NO	OK	17.7627	18.3985	0.0507378	0.95921	NO	OK			IFI27L2	CHR14	94594117	94595957	123.451	16.3991
																				ADCK2	CHR7	140372755	140394984	7.29961	16.0341	1.13525	0.0021786	YES	OK	7.29961	13.9689	0.93633	0.01564	YES	OK	7.29961	12.5563	0.782524	0.0798094	NO	OK			PTPRZ1	CHR7	121512976	121702096	64.1388	5.86858
	Gene	X2IP_LOG2.FOLD_CHANGE.	X8IP_LOG2.FOLD_CHANGE.	X8IONLY_LOG2.FOLD_CHANGE.		Gene	X2IP_LOG2.FOLD_CHANGE.	X8IP_LOG2.FOLD_CHANGE.	X8IONLY_LOG2.FOLD_CHANGE.											AHNAK	CHR11	62201015	62314332	4.1034	2.57637	-0.67148	0.793022	NO	OK	4.1034	1.85113	-1.14841	0.651607	NO	OK	4.1034	2.07703	-0.982293	0.590767	NO	OK			LINGO1	CHR15	77905354	77983244	10.9222	2.12243
	A4GALT	3.0046	2.32377	2.8224		FEZ1	-1.71852	-3.88485	-4.95273											AIM1L	CHR1	26608772	26680621	0.9964	2.53625	1.3479	0.528929	NO	OK	0.9964	4.34822	2.12563	0.338544	NO	OK	0.9964	4.12725	2.05039	0.377471	NO	OK			SALL2	CHR14	21945334	22005337	36.8065	6.87636
	ABCB8	1.24276	0.83808	0.957526		BST2	-5.39417	-4.47117	-4.16808											ALDH2	CHR12	112204690	112248997	25.3228	38.4108	0.601075	0.165429	NO	OK	25.3228	52.5725	1.05387	0.0021786	YES	OK	25.3228	41.9799	0.72926	0.0876271	NO	OK			TP53I11	CHR11	44748492	44972608	73.3419	4.84781
	ABR	-0.377742	-0.688199	-0.505801		CRABP1	-3.16797	-3.49076	-4.14295											ANXA2	CHR15	60639349	60690225	2.37706	3.1305	0.397215	0.945877	NO	OK	2.37706	4.67436	0.975593	0.867293	NO	OK	2.37706	6.15733	1.37313	0.808723	NO	OK			RPRM	CHR2	154333851	154335322	1.65421	2.20475
	ACADS	0.516594	0.664163	0.763791		EGR1	-6.67035	-4.54869	-4.0519											ANXA2P1	CHR4	154074269	154260474	15.0155	11.1664	-0.42728	0.776849	NO	OK	15.0155	9.92571	-0.597206	0.614134	NO	OK	15.0155	10.225	-0.554355	0.676567	NO	OK			C16ORF45	CHR16	15528324	15682116	24.3206	5.94476
	ACOT11	2.70394	2.36282	2.91942		BLCAP	-3.69942	-3.3988	-3.41965											ANXA2P3	CHR10	66585284	66586634	28.2082	22.333	-0.336936	0.471944	NO	OK	28.2082	20.9621	-0.428326	0.338481	NO	OK	28.2082	20.9865	-0.426652	0.373515	NO	OK			SERPING1	CHR11	57365026	57382326	168.078	46.6518
	ACSL4	0.20029	0.376193	0.0507378		IFI27L2	-2.91226	-2.88259	-3.41191											AP1S1	CHR7	100797685	100804557	13.6725	13.7714	0.0103987	0.992192	NO	OK	13.6725	20.0634	0.553284	0.236461	NO	OK	13.6725	16.8082	0.297886	0.662867	NO	OK			HLA-B	CHR6_QBL_HAP6	2615164	2618505	11.6963	1.58981
	ADCK2	1.13525	0.93633	0.782524		PTPRZ1	-3.45011	-2.59048	-3.27215											ARFGEF2	CHR20	47538267	47653232	5.28094	8.40271	0.67006	0.0471256	YES	OK	5.28094	10.7057	1.01951	0.000821971	YES	OK	5.28094	11.3833	1.10805	0.0015311	YES	OK			UBE2L6	CHR11	57319127	57335803	97.4945	13.5822
	AHNAK	-0.67148	-1.14841	-0.982293		LINGO1	-2.36347	-2.04401	-3.24345											ARHGAP21	CHR10	24872537	25012597	3.03725	2.49113	-0.285965	0.614545	NO	OK	3.03725	2.2723	-0.418612	0.38287	NO	OK	3.03725	1.85664	-0.71007	0.0933573	NO	OK			TMEM59L	CHR19	18723681	18731849	16.8065	0.254284
	AIM1L	1.3479	2.12563	2.05039		SALL2	-2.42024	-2.5219	-3.18523											ARRB1	CHR11	74971165	75062951	1.31155	5.08199	1.95413	0.000821971	YES	OK	1.31155	7.8146	2.5749	0.000821971	YES	OK	1.31155	7.80815	2.57371	0.000821971	YES	OK			CPS1	CHR2	211342405	211543831	7.48559	0.990003
	ALDH2	0.601075	1.05387	0.72926		TP53I11	-3.91923	-3.22127	-3.16008											ASRGL1	CHR11	62104773	62160888	59.3616	116.038	0.96699	0.0602061	NO	OK	59.3616	84.7298	0.513339	0.44783	NO	OK	59.3616	96.0544	0.694321	0.290117	NO	OK			BNIP3L	CHR8	26240145	26270644	37.5281	10.9513
	ANXA2	0.397215	0.975593	1.37313		RPRM	0.414478	-0.61459	-3.15215											ATF6	CHR1	161736026	161933861	29.9096	17.7946	-0.749172	0.0762565	NO	OK	29.9096	26.6693	-0.165433	0.84307	NO	OK	29.9096	27.3523	-0.128948	0.898093	NO	OK			LRRN1	CHR3	3841090	3890383	107.308	51.43
	ANXA2P1	-0.42728	-0.597206	-0.554355		C16ORF45	-2.03249	-1.97137	-2.68769											ATG3	CHR3	112233474	112303253	40.9104	127.571	1.64076	0.000821971	YES	OK	40.9104	91.2528	1.1574	0.0131264	YES	OK	40.9104	103.617	1.34072	0.00711447	YES	OK			RNF130	CHR5	179382242	179499114	194.422	45.7813
	ANXA2P3	-0.336936	-0.428326	-0.426652		SERPING1	-1.84913	-1.81551	-2.66931											ATG5	CHR6	106632265	106773728	20.2176	42.6368	1.07649	0.0122681	YES	OK	20.2176	34.899	0.787573	0.120027	NO	OK	20.2176	39.4888	0.965834	0.0520469	NO	OK			NKAIN1	CHR1	31652133	31712779	24.559	8.91379
	AP1S1	0.0103987	0.553284	0.297886		HLA-B	-2.87913	-2.52412	-2.62824											ATP11A	CHR13	113344369	113541482	11.7107	7.0703	-0.727988	0.0818262	NO	OK	11.7107	8.26958	-0.501946	0.274741	NO	OK	11.7107	10.8223	-0.113824	0.906569	NO	OK			NUP210	CHR3	13357732	13461809	29.9735	7.63292
	ARFGEF2	0.67006	1.01951	1.10805		UBE2L6	-2.8436	-2.07481	-2.62232											B4GALT1	CHR9	33097706	33167356	3.92507	2.58756	-0.601126	0.277239	NO	OK	3.92507	2.63088	-0.577172	0.375895	NO	OK	3.92507	2.82327	-0.475349	0.484609	NO	OK			CA11	CHR19	49141271	49185502	10.7637	0.938533
	ARHGAP21	-0.285965	-0.418612	-0.71007		TMEM59L	-6.04644	-2.50402	-2.60778											BARD1	CHR2	215590267	215674428	13.9462	24.3911	0.806483	0.0520469	NO	OK	13.9462	22.7059	0.703198	0.10449	NO	OK	13.9462	20.2616	0.53888	0.312459	NO	OK			SOX11	CHR2	5832798	5848284	2.92068	1.16081
	ARRB1	1.95413	2.5749	2.57371		CPS1	-2.91861	-2.74902	-2.59016											BCAT1	CHR12	24952193	25102393	40.0038	26.9984	-0.567265	0.182251	NO	OK	40.0038	26.8136	-0.577174	0.183184	NO	OK	40.0038	16.5003	-1.27764	0.000821971	YES	OK			NELL2	CHR12	44902057	45307711	36.4618	11.9186
	ASRGL1	0.96699	0.513339	0.694321		BNIP3L	-1.77687	-2.18551	-2.58893											BTLA	CHR3	112182585	112218408	0.0214277	4.26453	7.63677	0.532079	NO	OK	0.0214277	2.76147	7.00982	0.532079	NO	OK	0.0214277	4.48199	7.70852	0.548985	NO	OK			NUCB2	CHR11	17298285	17353382	36.0068	5.13847
	ATF6	-0.749172	-0.165433	-0.128948		LRRN1	-1.06108	-1.73943	-2.58671											C17ORF51	CHR17	21431570	21476938	3.67192	4.73043	0.365434	0.448407	NO	OK	3.67192	2.73186	-0.426653	0.360167	NO	OK	3.67192	2.85031	-0.365418	0.496741	NO	OK			MN1	CHR22	28140997	28197486	4.54011	1.53916
	ATG3	1.64076	1.1574	1.34072		RNF130	-2.08636	-2.18493	-2.58667											C6ORF211	CHR6	151773421	151791518	40.9168	143.43	1.80958	0.000821971	YES	OK	40.9168	127.295	1.63741	0.000821971	YES	OK	40.9168	128.105	1.64656	0.000821971	YES	OK			JAKMIP2	CHR5	146939556	147162292	12.5931	5.93255
	ATG5	1.07649	0.787573	0.965834		NKAIN1	-1.46214	-1.72295	-2.51088											CAPN2	CHR1	223889294	223963720	42.922	14.1271	-1.60325	0.000821971	YES	OK	42.922	21.1953	-1.01797	0.0015311	YES	OK	42.922	20.0387	-1.09893	0.000821971	YES	OK			BTBD3	CHR20	11871476	11907245	32.6174	14.3492
	ATP11A	-0.727988	-0.501946	-0.113824		NUP210	-1.97338	-1.42796	-2.47828											CBFA2T2	CHR20	32077900	32237893	32.5068	66.1252	1.02446	0.311323	NO	OK	32.5068	51.1079	0.652804	0.569156	NO	OK	32.5068	39.5114	0.281528	0.822739	NO	OK			SH3BGRL	CHRX	80369199	80554325	33.4297	15.4319
	B4GALT1	-0.601126	-0.577172	-0.475349		CA11	-3.51962	-2.6239	-2.43849											CCDC101	CHR16	28564916	28634907	28.9322	23.0115	-0.330321	0.589737	NO	OK	28.9322	23.9644	-0.271782	0.690955	NO	OK	28.9322	27.1233	-0.0931444	0.935058	NO	OK			PNMAL1	CHR19	46969747	46974820	19.6848	6.11262
	BARD1	0.806483	0.703198	0.53888		SOX11	-1.33116	-1.9332	-2.40418											CCDC109B	CHR4	110481308	110651242	26.9346	30.8216	0.194482	0.895941	NO	OK	26.9346	23.2877	-0.209893	0.89018	NO	OK	26.9346	16.398	-0.715936	0.453167	NO	OK			C1ORF198	CHR1	230972863	231010697	44.4511	13.2567
	BCAT1	-0.567265	-0.577174	-1.27764		NELL2	-1.61317	-1.59251	-2.38737											CCDC53	CHR12	102406716	102455899	18.7944	10.2053	-0.880988	0.0412586	YES	OK	18.7944	11.3145	-0.732126	0.100097	NO	OK	18.7944	8.82659	-1.09037	0.0176818	YES	OK			FKBP10	CHR17	39958200	39979469	28.7055	5.61319
	BTLA	7.63677	7.00982	7.70852		NUCB2	-2.80886	-2.30618	-2.30917											CD320	CHR19	8366980	8386280	154.163	192.662	0.321618	0.79754	NO	OK	154.163	214.763	0.478288	0.577068	NO	OK	154.163	267.79	0.796642	0.354559	NO	OK			NAB2	CHR12	57482676	57505196	17.4453	2.95887
	C17ORF51	0.365434	-0.426653	-0.365418		MN1	-1.56059	-2.05014	-2.26152											CD53	CHR1	111413820	111442558	0.156224	4.66223	4.89933	0.0015311	YES	OK	0.156224	2.20974	3.82219	0.00393791	YES	OK	0.156224	3.5768	4.51698	0.00393791	YES	OK			AIG1	CHR6	143381846	143661527	16.2476	5.08368
	C6ORF211	1.80958	1.63741	1.64656		JAKMIP2	-1.08591	-1.38681	-2.24855											CDA	CHR1	20915443	20945402	0.539266	32.6387	5.91944	0.000821971	YES	OK	0.539266	30.5001	5.82167	0.000821971	YES	OK	0.539266	32.4047	5.90906	0.000821971	YES	OK			SCRN2	CHR17	45908992	45918699	47.599	12.3425
	CAPN2	-1.60325	-1.01797	-1.09893		BTBD3	-1.18468	-1.79595	-2.18074											CDC25B	CHR20	3776400	3786822	16.8612	20.3462	0.271049	0.620903	NO	OK	16.8612	23.4247	0.474321	0.260085	NO	OK	16.8612	23.9466	0.506113	0.26468	NO	OK			TCF7L2	CHR10	114710008	114927439	21.5017	9.06672
	CBFA2T2	1.02446	0.652804	0.281528		SH3BGRL	-1.11522	-1.52032	-2.17694											CENPA	CHR2	27008881	27031455	26.6635	73.8294	1.46933	0.000821971	YES	OK	26.6635	57.7752	1.11559	0.0113547	YES	OK	26.6635	57.8825	1.11826	0.0152215	YES	OK			ZNF423	CHR16	49524448	49890055	26.8951	8.99443
	CCDC101	-0.330321	-0.271782	-0.0931444		PNMAL1	-1.68722	-1.64259	-2.12396											CEPT1	CHR1	111659726	111727783	10.1001	16.4543	0.704095	0.574761	NO	OK	10.1001	17.3733	0.782499	0.510401	NO	OK	10.1001	18.3161	0.858741	0.48346	NO	OK			DLK1	CHR14	101193201	101201529	24.2427	4.92604
	CCDC109B	0.194482	-0.209893	-0.715936		C1ORF198	-1.74549	-1.65234	-2.03548											CFLAR	CHR2	201980775	202037411	9.06405	24.3136	1.42354	0.0184802	YES	OK	9.06405	27.6556	1.60934	0.00393791	YES	OK	9.06405	31.18	1.78239	0.000821971	YES	OK			C1ORF21	CHR1	184356149	184598155	2.09848	1.11882
	CCDC53	-0.880988	-0.732126	-1.09037		FKBP10	-2.35443	-1.58666	-2.0245											CHN2	CHR7	29234120	29603266	0.423481	2.20595	2.38103	0.0911455	NO	OK	0.423481	2.15806	2.34936	0.095933	NO	OK	0.423481	1.42675	1.75236	0.257972	NO	OK			VAT1L	CHR16	77822482	78014001	1.41601	1.55582
	CD320	0.321618	0.478288	0.796642		NAB2	-2.55972	-2.10176	-2.02431											CHST12	CHR7	2443194	2477633	34.9314	30.365	-0.202114	0.775238	NO	OK	34.9314	31.3177	-0.157549	0.832503	NO	OK	34.9314	46.4881	0.412335	0.414181	NO	OK			SDC3	CHR1	31342310	31381480	25.2628	7.23744
	CD53	4.89933	3.82219	4.51698		AIG1	-1.67628	-1.51216	-1.9832											CITED4	CHR1	41326727	41328018	96.0367	42.3225	-1.18216	0.00393791	YES	OK	96.0367	41.0661	-1.22564	0.000821971	YES	OK	96.0367	42.8483	-1.16435	0.00336709	YES	OK			ECEL1	CHR2	233344536	233352532	6.84524	1.65245
	CDA	5.91944	5.82167	5.90906		SCRN2	-1.9473	-1.73476	-1.97982											CLDN19	CHR1	43198763	43205925	1.64171	1.15759	-0.504074	0.469169	NO	OK	1.64171	0.924496	-0.828461	0.196227	NO	OK	1.64171	1.06537	-0.623845	0.392711	NO	OK			PCYT1B	CHRX	24576203	24690979	3.24934	2.29105
	CDC25B	0.271049	0.474321	0.506113		TCF7L2	-1.2458	-1.72265	-1.97914											CNKSR3	CHR6	154726381	154831753	14.6426	4.32437	-1.75961	0.000821971	YES	OK	14.6426	3.6962	-1.98605	0.000821971	YES	OK	14.6426	3.60347	-2.02271	0.000821971	YES	OK			CD74	CHR5	149737201	149792499	32.1876	6.53884
	CENPA	1.46933	1.11559	1.11826		ZNF423	-1.58024	-1.54832	-1.92153											CNTROB	CHR17	7835441	7853237	14.1427	13.3144	-0.0870717	0.930057	NO	OK	14.1427	10.6921	-0.403508	0.434285	NO	OK	14.1427	11.3915	-0.312098	0.62419	NO	OK			CKAP4	CHR12	106631656	106641713	109.776	28.2726
	CEPT1	0.704095	0.782499	0.858741		DLK1	-2.29905	-2.19418	-1.90805											CORO1C	CHR12	109038886	109125295	64.7561	64.4149	-0.00761977	0.992235	NO	OK	64.7561	52.0843	-0.314166	0.457027	NO	OK	64.7561	48.0455	-0.430615	0.289384	NO	OK			USP11	CHRX	47092313	47107728	109.183	52.7091
	CFLAR	1.42354	1.60934	1.78239		C1ORF21	-0.907363	-1.07468	-1.90435											CPPED1	CHR16	12753655	12897744	2.85757	3.24394	0.182957	0.794169	NO	OK	2.85757	2.97235	0.0568118	0.95607	NO	OK	2.85757	2.84512	-0.00629837	0.994652	NO	OK			WDR54	CHR2	74648855	74669546	78.9112	22.0627
	CHN2	2.38103	2.34936	1.75236		VAT1L	0.135843	-0.782467	-1.87997											CTH	CHR1	70724649	70909435	5.57806	14.1302	1.34095	0.177302	NO	OK	5.57806	18.3006	1.71406	0.0673849	NO	OK	5.57806	16.681	1.58037	0.12745	NO	OK			THTPA	CHR14	23980968	24048009	8.17326	3.66256
	CHST12	-0.202114	-0.157549	0.412335		SDC3	-1.80347	-1.72021	-1.86499											CTSB	CHR8	11660189	11725646	40.4178	37.9105	-0.0923927	0.969675	NO	OK	40.4178	51.9769	0.362878	0.841424	NO	OK	40.4178	67.1273	0.731907	0.560139	NO	OK			CCDC28B	CHR1	32645344	32671080	45.7948	19.1685
	CITED4	-1.18216	-1.22564	-1.16435		ECEL1	-2.0505	-1.25091	-1.86226											DNAJC15	CHR13	43597183	43684011	24.5619	62.8564	1.35564	0.000821971	YES	OK	24.5619	49.4498	1.00954	0.000821971	YES	OK	24.5619	58.1185	1.24257	0.000821971	YES	OK			PODXL	CHR7	130794854	131241391	117.128	72.0738
	CLDN19	-0.504074	-0.828461	-0.623845		PCYT1B	-0.504139	-0.945961	-1.84967											DNMT3L	CHR21	45663909	45698779	0.206703	144.713	9.45141	0.000821971	YES	OK	0.206703	60.3199	8.18893	0.000821971	YES	OK	0.206703	109.055	9.04328	0.000821971	YES	OK			PGAP1	CHR2	197697727	197791454	4.74128	1.8953
	CNKSR3	-1.75961	-1.98605	-2.02271		CD74	-2.2994	-1.48933	-1.81802											DPPA3	CHR12	7863957	7870156	0.983373	13.3388	3.76175	0.000821971	YES	OK	0.983373	63.1328	6.00451	0.000821971	YES	OK	0.983373	90.5072	6.52415	0.000821971	YES	OK			PACS1	CHR11	65837485	66012312	11.7396	6.28133
	CNTROB	-0.0870717	-0.403508	-0.312098		CKAP4	-1.95709	-1.43394	-1.7198											DRG2	CHR17	17991180	18011299	33.58	36.7178	0.128877	0.860387	NO	OK	33.58	32.3197	-0.0551911	0.952306	NO	OK	33.58	31.9224	-0.0730329	0.939948	NO	OK			DDAH1	CHR1	85784167	86044046	1.62191	1.23298
	CORO1C	-0.00761977	-0.314166	-0.430615		USP11	-1.05063	-1.36508	-1.69586											DSCR8	CHR21	39493544	39528605	88.1384	45.8055	-0.944251	0.017278	YES	OK	88.1384	45.6133	-0.950318	0.0126996	YES	OK	88.1384	39.9149	-1.14284	0.00503443	YES	OK			PREX2	CHR8	68864089	69147285	4.22222	1.73737
	CPPED1	0.182957	0.0568118	-0.00629837		WDR54	-1.83862	-1.3986	-1.68068											DYSF	CHR2	71680752	71913893	0.619405	4.48311	2.85554	0.000821971	YES	OK	0.619405	4.69036	2.92074	0.000821971	YES	OK	0.619405	3.82316	2.62581	0.000821971	YES	OK			HLA-A	CHR6_MANN_HAP4	1202631	1206062	5.64012	1.58568
	CTH	1.34095	1.71406	1.58037		THTPA	-1.15806	-1.04462	-1.66923											EFHD1	CHR2	233470766	233552053	2.17157	10.9362	2.3323	0.000821971	YES	OK	2.17157	5.43365	1.32318	0.038411	YES	OK	2.17157	6.59753	1.60318	0.00662594	YES	OK			NUDT7	CHR16	77756388	77776229	14.7471	4.25185
	CTSB	-0.0923927	0.362878	0.731907		CCDC28B	-1.25645	-1.18281	-1.65524											EFR3B	CHR2	25264972	25382004	5.13952	3.75549	-0.452631	0.298838	NO	OK	5.13952	2.97925	-0.786684	0.0280538	YES	OK	5.13952	2.32978	-1.14144	0.00336709	YES	OK			SFRP2	CHR4	154701741	154710228	172.623	30.4696
	DNAJC15	1.35564	1.00954	1.24257		PODXL	-0.700538	-0.818812	-1.64538											EGLN3	CHR14	34393420	34420284	1.67567	3.0959	0.885621	0.0599482	NO	OK	1.67567	6.68745	1.99672	0.000821971	YES	OK	1.67567	8.09603	2.27248	0.000821971	YES	OK			MFAP2	CHR1	17300948	17308081	136.814	21.2341
	DNMT3L	9.45141	8.18893	9.04328		PGAP1	-1.32285	-1.1255	-1.61554											ERBB2IP	CHR5	65221540	65376851	1.22148	1.52354	0.318802	0.970437	NO	OK	1.22148	1.03884	-0.233647	0.974113	NO	OK	1.22148	0.941245	-0.375984	0.95921	NO	OK			GNG7	CHR19	2511217	2702746	4.5204	3.62297
	DPPA3	3.76175	6.00451	6.52415		PACS1	-0.902238	-1.35167	-1.59373											EXPH5	CHR11	108376157	108464374	1.64061	6.11147	1.89729	0.38477	NO	OK	1.64061	2.95189	0.847412	0.714427	NO	OK	1.64061	2.819	0.780956	0.803065	NO	OK			GYG2	CHRX	2746862	2801000	13.567	7.60157
	DRG2	0.128877	-0.0551911	-0.0730329		DDAH1	-0.395548	-0.521691	-1.57472											FAM43B	CHR1	20878931	20882513	6.62714	7.20072	0.119756	0.924187	NO	OK	6.62714	7.15783	0.111138	0.922211	NO	OK	6.62714	9.30531	0.489669	0.458794	NO	OK			GAP43	CHR3	115342150	115440334	9.18157	7.47167
	DSCR8	-0.944251	-0.950318	-1.14284		PREX2	-1.2811	-1.399	-1.5561											FAM73A	CHR1	78245308	78345222	1.94915	1.90743	-0.0312157	0.97765	NO	OK	1.94915	2.00184	0.0384814	0.972328	NO	OK	1.94915	2.00872	0.0434318	0.970745	NO	OK			BAZ2B	CHR2	160175489	160491804	8.98426	3.71237
	DYSF	2.85554	2.92074	2.62581		HLA-A	-1.83063	-0.946327	-1.55141											FBP1	CHR9	97365415	97402531	0.997046	19.4484	4.28585	0.000821971	YES	OK	0.997046	24.9317	4.64417	0.000821971	YES	OK	0.997046	24.1947	4.60089	0.000821971	YES	OK			MPP2	CHR17	41950009	41985113	9.92252	7.72845
	EFHD1	2.3323	1.32318	1.60318		NUDT7	-1.79427	-1.30047	-1.53567											FBXO25	CHR8	356807	495781	4.94452	7.80768	0.659063	0.57469	NO	OK	4.94452	5.8536	0.243493	0.902338	NO	OK	4.94452	4.80518	-0.0412406	0.985866	NO	OK			F2R	CHR5	76011867	76031595	22.4332	12.4631
	EFR3B	-0.452631	-0.786684	-1.14144		SFRP2	-2.50218	-0.623198	-1.52126											FEZ2	CHR2	36779403	36825332	9.62838	16.2568	0.755676	0.0380847	YES	OK	9.62838	17.2314	0.839674	0.0207791	YES	OK	9.62838	19.665	1.03026	0.00809752	YES	OK			CCND2	CHR12	4382901	4414522	53.496	26.0996
	EGLN3	0.885621	1.99672	2.27248		MFAP2	-2.68775	-1.90874	-1.51846											FILIP1	CHR6	76005530	76203496	9.93623	4.0021	-1.31194	0.000821971	YES	OK	9.93623	1.32858	-2.90281	0.000821971	YES	OK	9.93623	0.992615	-3.32339	0.000821971	YES	OK			LZTFL1	CHR3	45865445	45883621	3.93639	1.93588
	ERBB2IP	0.318802	-0.233647	-0.375984		GNG7	-0.31928	-1.53284	-1.51634											FUCA1	CHR1	24171489	24194859	21.7503	21.0629	-0.0463354	0.962089	NO	OK	21.7503	25.7937	0.245982	0.649835	NO	OK	21.7503	28.9352	0.41179	0.382466	NO	OK			ITGA7	CHR12	56075329	56106089	4.6188	1.49767
	EXPH5	1.89729	0.847412	0.780956		GYG2	-0.835736	-0.956793	-1.5157											GAS7	CHR17	9813925	10101868	0.304658	2.03509	2.73983	0.000821971	YES	OK	0.304658	1.41261	2.2131	0.000821971	YES	OK	0.304658	1.46848	2.26907	0.000821971	YES	OK			MOAP1	CHR14	93648540	93651249	22.222	7.98047
	FAM43B	0.119756	0.111138	0.489669		GAP43	-0.297309	-0.671249	-1.50424											GGT5	CHR22	24615561	24641289	0.833765	5.25288	2.6554	0.0021786	YES	OK	0.833765	4.82008	2.53134	0.00393791	YES	OK	0.833765	5.01502	2.58854	0.00503443	YES	OK			PCMTD1	CHR8	52232136	52811735	10.7074	5.70214
	FAM73A	-0.0312157	0.0384814	0.0434318		BAZ2B	-1.27506	-1.51671	-1.50039											GINS3	CHR16	58426062	58445319	9.4314	15.5554	0.721875	0.0602061	NO	OK	9.4314	12.7647	0.436621	0.361895	NO	OK	9.4314	12.9932	0.462208	0.369448	NO	OK			LRRC49	CHR15	71184927	71342436	3.13986	1.59019
	FBP1	4.28585	4.64417	4.60089		MPP2	-0.360527	-1.10897	-1.49532											GLIPR2	CHR9	36136741	36163952	10.4039	7.53424	-0.465584	0.362648	NO	OK	10.4039	7.23828	-0.523399	0.338058	NO	OK	10.4039	6.56727	-0.663752	0.222376	NO	OK			FAM161A	CHR2	62051982	62081278	5.14084	3.3362
	FBXO25	0.659063	0.243493	-0.0412406		F2R	-0.847969	-1.08416	-1.49195											GOSR1	CHR17	28804425	28855253	9.04168	8.87758	-0.0264244	0.977669	NO	OK	9.04168	9.30759	0.0418173	0.96537	NO	OK	9.04168	8.41467	-0.103683	0.906444	NO	OK			PTPRS	CHR19	5205457	5340823	26.4655	10.5405
	FEZ2	0.755676	0.839674	1.03026		CCND2	-1.0354	-0.948115	-1.4889											GOT1	CHR10	101156626	101190530	36.2338	63.1947	0.802469	0.0104539	YES	OK	36.2338	63.2642	0.804054	0.00998972	YES	OK	36.2338	56.3374	0.636757	0.0762565	NO	OK			C5ORF30	CHR5	102594441	102614361	15.459	8.08609
	FILIP1	-1.31194	-2.90281	-3.32339		LZTFL1	-1.02388	-1.12085	-1.48877											GPD1L	CHR3	32148002	32210207	1.98966	3.07718	0.629084	0.177492	NO	OK	1.98966	2.3505	0.240446	0.740813	NO	OK	1.98966	1.96916	-0.0149467	0.989805	NO	OK			HMGA2	CHR12	66151800	66360071	2.14887	0.914309
	FUCA1	-0.0463354	0.245982	0.41179		ITGA7	-1.6248	-1.38934	-1.48508											GPD2	CHR2	157291964	157442915	8.61771	8.77769	0.0265365	0.978939	NO	OK	8.61771	7.49	-0.202339	0.749516	NO	OK	8.61771	5.48278	-0.652396	0.117333	NO	OK			PLD3	CHR19	40826966	40884397	364.195	131.232
	GAS7	2.73983	2.2131	2.26907		MOAP1	-1.47744	-1.07711	-1.4845											GPR160	CHR3	169755734	169803233	0.875165	7.06086	3.01222	0.000821971	YES	OK	0.875165	4.63116	2.40375	0.000821971	YES	OK	0.875165	2.67464	1.61172	0.0015311	YES	OK			MAP1B	CHR5	71403117	71505397	48.0424	33.429
	GGT5	2.6554	2.53134	2.58854		PCMTD1	-0.909027	-1.09268	-1.4829											GRHL1	CHR2	10091791	10142449	0.771811	3.18542	2.04516	0.000821971	YES	OK	0.771811	1.92889	1.32145	0.00503443	YES	OK	0.771811	1.93807	1.3283	0.00857464	YES	OK			KIAA0355	CHR19	34745455	34846471	5.85029	2.94747
	GINS3	0.721875	0.436621	0.462208		LRRC49	-0.981504	-0.697234	-1.47936											GTF3A	CHR13	27998680	28024837	84.7255	116.432	0.458621	0.335997	NO	OK	84.7255	101.863	0.265757	0.666144	NO	OK	84.7255	98.9993	0.224622	0.758463	NO	OK			CMTM3	CHR16	66636579	66647801	73.5338	37.7982
	GLIPR2	-0.465584	-0.523399	-0.663752		FAM161A	-0.623799	-1.07809	-1.46582											GTSF1	CHR12	54849735	54867386	24.6899	2.89288	-3.09334	0.000821971	YES	OK	24.6899	7.59709	-1.7004	0.000821971	YES	OK	24.6899	6.89742	-1.83979	0.0015311	YES	OK			VEZF1	CHR17	56048904	56073911	11.2587	5.95292
	GOSR1	-0.0264244	0.0418173	-0.103683		PTPRS	-1.32817	-1.29346	-1.45926											GYPC	CHR2	127413510	127454251	59.4558	48.2406	-0.301568	0.559347	NO	OK	59.4558	38.2446	-0.636562	0.094512	NO	OK	59.4558	32.2845	-0.880974	0.016861	YES	OK			USP44	CHR12	95910201	95945263	14.3823	10.4492
	GOT1	0.802469	0.804054	0.636757		C5ORF30	-0.934929	-1.31173	-1.44762											HIC2	CHR22	21771673	21805786	10.2221	10.3549	0.0186183	0.986286	NO	OK	10.2221	8.35463	-0.291046	0.622094	NO	OK	10.2221	10.242	0.00280169	0.997315	NO	OK			TMEM216	CHR11	61159831	61166335	35.2847	17.2776
	GPD1L	0.629084	0.240446	-0.0149467		HMGA2	-1.23282	-1.01916	-1.44625											HIST1H1E	CHR6	26156558	26157343	10.7896	29.4951	1.45083	0.000821971	YES	OK	10.7896	9.60697	-0.167494	0.883221	NO	OK	10.7896	10.7252	-0.00863749	0.994139	NO	OK			TMEM116	CHR12	112369053	112451023	11.6127	5.4187
	GPD2	0.0265365	-0.202339	-0.652396		PLD3	-1.47259	-1.16815	-1.44181											HORMAD1	CHR1	150670449	150702419	15.3007	11.7137	-0.385401	0.433895	NO	OK	15.3007	17.3209	0.178909	0.792701	NO	OK	15.3007	12.1156	-0.336731	0.549041	NO	OK			IDH2	CHR15	90626301	90645747	110.987	47.6506
	GPR160	3.01222	2.40375	1.61172		MAP1B	-0.523207	-0.872699	-1.43968											HPGD	CHR4	175411228	175444049	0.18964	17.1038	6.49491	0.000821971	YES	OK	0.18964	18.2621	6.58945	0.000821971	YES	OK	0.18964	29.0907	7.26116	0.000821971	YES	OK			PSME1	CHR14	24605364	24610831	109.553	44.4867
	GRHL1	2.04516	1.32145	1.3283		KIAA0355	-0.98903	-1.2537	-1.43857											HUS1	CHR7	48002740	48019222	12.4794	43.6895	1.80775	0.000821971	YES	OK	12.4794	43.3411	1.79619	0.000821971	YES	OK	12.4794	48.0291	1.94436	0.000821971	YES	OK			LHFPL2	CHR5	77781037	77944648	5.2306	2.85908
	GTF3A	0.458621	0.265757	0.224622		CMTM3	-0.960091	-1.21292	-1.43589											IER5	CHR1	181057637	181060326	2.30943	1.3622	-0.761594	0.897275	NO	OK	2.30943	2.57351	0.156199	0.979288	NO	OK	2.30943	1.49625	-0.626187	0.944266	NO	OK			BID	CHR22	18214364	18257431	12.5839	5.11742
	GTSF1	-3.09334	-1.7004	-1.83979		VEZF1	-0.919375	-1.23138	-1.42437											IL6R	CHR1	154377668	154441926	0.190575	9.03701	5.56742	0.000821971	YES	OK	0.190575	7.88389	5.37048	0.000821971	YES	OK	0.190575	11.746	5.94567	0.000821971	YES	OK			KIF1A	CHR2	241653180	241760776	10.8393	4.67049
	GYPC	-0.301568	-0.636562	-0.880974		USP44	-0.460901	-0.2153	-1.41611											IL6ST	CHR5	55230924	55290826	4.38354	4.23255	-0.0505712	0.974741	NO	OK	4.38354	3.38831	-0.371533	0.712466	NO	OK	4.38354	4.84849	0.14544	0.927778	NO	OK			CBX2	CHR17	77751943	77762183	48.1082	30.4999
	HIC2	0.0186183	-0.291046	0.00280169		TMEM216	-1.03014	-1.16626	-1.40273											KLF5	CHR13	73633141	73651676	1.63609	11.8132	2.85208	0.000821971	YES	OK	1.63609	5.73509	1.80957	0.000821971	YES	OK	1.63609	8.6232	2.39797	0.000821971	YES	OK			FAM195B	CHR17	79780227	79791167	156.558	136.653
	HIST1H1E	1.45083	-0.167494	-0.00863749		TMEM116	-1.09969	-1.12464	-1.39721											KRT8	CHR12	53290968	53346695	76.6664	469.322	2.61391	0.000821971	YES	OK	76.6664	555.931	2.85824	0.000821971	YES	OK	76.6664	529.779	2.78872	0.0015311	YES	OK			QPRT	CHR16	29674299	29710022	3.71955	2.60697
	HORMAD1	-0.385401	0.178909	-0.336731		IDH2	-1.21983	-1.03124	-1.368											LAMA1	CHR18	6941736	7117813	20.0749	10.3381	-0.95743	0.00711447	YES	OK	20.0749	10.6307	-0.917166	0.00905411	YES	OK	20.0749	7.08819	-1.50191	0.000821971	YES	OK			CD24	CHRY	21094427	21239302	272.906	166.906
	HPGD	6.49491	6.58945	7.26116		PSME1	-1.30018	-1.08552	-1.36447											LAMC1	CHR1	182992426	183114837	73.8841	76.8982	0.0576857	0.948809	NO	OK	73.8841	115.697	0.647014	0.0798094	NO	OK	73.8841	171.083	1.21136	0.000821971	YES	OK			UBE2E2	CHR3	23244505	23648882	22.7174	15.2602
	HUS1	1.80775	1.79619	1.94436		LHFPL2	-0.871427	-0.812969	-1.35645											LCP1	CHR13	46700053	46756459	0.747051	1.2134	0.699782	0.265056	NO	OK	0.747051	4.78871	2.68036	0.000821971	YES	OK	0.747051	4.77752	2.67698	0.000821971	YES	OK			MYEF2	CHR15	48413168	48470558	21.9905	12.1571
	IER5	-0.761594	0.156199	-0.626187		BID	-1.29809	-0.93655	-1.32761											LIM2	CHR19	51874869	51891210	0.830789	22.4725	4.75754	0.501877	NO	OK	0.830789	127.87	7.26598	0.501877	NO	OK	0.830789	136.346	7.35857	0.530723	NO	OK			TSC22D1	CHR13	45006278	45154568	55.296	34.2996
	IL6R	5.56742	5.37048	5.94567		KIF1A	-1.21462	0.228139	-1.32026											LMBR1L	CHR12	49490805	49504680	21.1098	16.7316	-0.335338	0.540998	NO	OK	21.1098	18.0068	-0.229378	0.726427	NO	OK	21.1098	16.4721	-0.35789	0.534967	NO	OK			MAGED1	CHRX	51546154	51645450	177.103	70.1295
	IL6ST	-0.0505712	-0.371533	0.14544		CBX2	-0.65748	-1.07239	-1.31143											LPIN1	CHR2	11886728	11967574	3.67172	12.5358	1.77153	0.000821971	YES	OK	3.67172	16.3659	2.15617	0.000821971	YES	OK	3.67172	14.3576	1.96729	0.000821971	YES	OK			SLCO3A1	CHR15	92396937	92715665	3.55726	1.2446
	KLF5	2.85208	1.80957	2.39797		FAM195B	-0.196184	-0.881485	-1.30639											LRPAP1	CHR4	3505323	3534224	17.4614	15.3634	-0.184666	0.753761	NO	OK	17.4614	14.1659	-0.301748	0.487877	NO	OK	17.4614	16.1175	-0.115541	0.884665	NO	OK			FHL1	CHRX	135228860	135293598	13.8654	14.3018
	KRT8	2.61391	2.85824	2.78872		QPRT	-0.512756	-0.560087	-1.30048											LRRC25	CHR19	18501953	18508415	0.878291	0.60536	-0.536906	0.643417	NO	OK	0.878291	0.975604	0.151596	0.934129	NO	OK	0.878291	0.752585	-0.222845	0.905771	NO	OK			ABI2	CHR2	204193002	204296925	46.6975	22.8555
	LAMA1	-0.95743	-0.917166	-1.50191		CD24	-0.709373	-0.781537	-1.29328											LYRM1	CHR16	20868935	20936329	31.2712	11.6749	-1.42142	0.000821971	YES	OK	31.2712	16.2034	-0.948538	0.0164704	YES	OK	31.2712	13.4324	-1.21912	0.0027796	YES	OK			PTBP2	CHR1	97187174	97280605	11.4978	5.97206
	LAMC1	0.0576857	0.647014	1.21136		UBE2E2	-0.574025	-0.905021	-1.28239											MAN1A2	CHR1	117909472	118071496	2.86188	1.94397	-0.557955	0.227681	NO	OK	2.86188	1.91688	-0.5782	0.191084	NO	OK	2.86188	1.89626	-0.593803	0.208703	NO	OK			PFKM	CHR12	48436756	48551377	46.8113	23.4905
	LCP1	0.699782	2.68036	2.67698		MYEF2	-0.855076	-1.00104	-1.28135											MFAP3L	CHR4	170907746	170948319	0.870264	4.51198	2.37423	0.000821971	YES	OK	0.870264	4.70034	2.43324	0.000821971	YES	OK	0.870264	5.14993	2.56503	0.000821971	YES	OK			TSPYL4	CHR6	116571070	116575261	10.0143	4.68983
	LIM2	4.75754	7.26598	7.35857		TSC22D1	-0.688981	-0.915626	-1.27824											MGST2	CHR4	140586921	141075378	20.6467	8.05974	-1.35711	0.027352	YES	OK	20.6467	11.6958	-0.819917	0.211456	NO	OK	20.6467	17.0982	-0.272069	0.803682	NO	OK			S1PR2	CHR19	10323030	10341948	5.34762	1.36112
	LMBR1L	-0.335338	-0.229378	-0.35789		MAGED1	-1.3365	-1.32689	-1.27535											MICAL2	CHR11	12132137	12285331	1.02632	1.95788	0.931808	0.127978	NO	OK	1.02632	1.36587	0.412328	0.626525	NO	OK	1.02632	1.19516	0.219716	0.866661	NO	OK			LANCL1	CHR2	211295971	211342186	12.9181	6.40857
	LPIN1	1.77153	2.15617	1.96729		SLCO3A1	-1.51508	-1.31742	-1.27011											MKI67	CHR10	129894924	129924468	7.08947	10.1382	0.516055	0.205088	NO	OK	7.08947	10.9418	0.626102	0.0961452	NO	OK	7.08947	10.7077	0.5949	0.147607	NO	OK			DIXDC1	CHR11	111807926	111893363	7.0769	3.51984
	LRPAP1	-0.184666	-0.301748	-0.115541		FHL1	0.0447119	-0.622531	-1.26609											MPP7	CHR10	28339922	28591983	1.52391	3.76477	1.30478	0.0027796	YES	OK	1.52391	2.34628	0.622594	0.285769	NO	OK	1.52391	2.00064	0.392678	0.597485	NO	OK			TCF4	CHR18	52889561	53332081	23.1292	12.5366
	LRRC25	-0.536906	0.151596	-0.222845		ABI2	-1.0308	-0.864566	-1.2649											MTFR1	CHR8	66556887	66622842	14.7124	22.0082	0.581014	0.106916	NO	OK	14.7124	23.0843	0.64988	0.0557627	NO	OK	14.7124	18.5254	0.332474	0.509686	NO	OK			STAU2	CHR8	74332308	74659943	18.0505	11.8325
	LYRM1	-1.42142	-0.948538	-1.21912		PTBP2	-0.945052	-0.995818	-1.26377											MYBL2	CHR20	42295708	42345122	109.139	301.104	1.4641	0.000821971	YES	OK	109.139	308.584	1.4995	0.000821971	YES	OK	109.139	301.587	1.46641	0.000821971	YES	OK			MORN2	CHR2	39103102	39109850	15.0421	6.97998
	MAN1A2	-0.557955	-0.5782	-0.593803		PFKM	-0.994778	-1.05099	-1.24323											MYO5B	CHR18	47349155	47721469	2.49997	5.84365	1.22496	0.000821971	YES	OK	2.49997	2.19639	-0.186775	0.792637	NO	OK	2.49997	1.31169	-0.930486	0.025912	YES	OK			DHX40	CHR17	57642885	57685751	13.9684	8.22941
	MFAP3L	2.37423	2.43324	2.56503		TSPYL4	-1.09446	-1.02277	-1.23987											NACA2	CHR17	59667793	59668563	79.4545	98.8267	0.314772	0.494314	NO	OK	79.4545	100.011	0.331961	0.453001	NO	OK	79.4545	93.0378	0.227689	0.704775	NO	OK			EIF2AK2	CHR2	37331651	37384225	9.65666	4.60924
	MGST2	-1.35711	-0.819917	-0.272069		S1PR2	-1.9741	-1.28664	-1.23904											NACAP1	CHR8	102381120	102381823	1.01201	1.19471	0.239433	0.899841	NO	OK	1.01201	1.49785	0.565673	0.640233	NO	OK	1.01201	1.27102	0.328766	0.852153	NO	OK			MFGE8	CHR15	89420518	89456672	56.747	20.8511
	MICAL2	0.931808	0.412328	0.219716		LANCL1	-1.01132	-0.892609	-1.23026											NBAS	CHR2	15307031	15701454	6.68409	4.86623	-0.457926	0.304778	NO	OK	6.68409	5.68312	-0.234048	0.687332	NO	OK	6.68409	5.46602	-0.290242	0.615401	NO	OK			VIM	CHR10	17270257	17279592	167.008	117.011
	MKI67	0.516055	0.626102	0.5949		DIXDC1	-1.00761	-0.956459	-1.21598											NCOA4	CHR10	51565107	51591292	38.4002	51.4711	0.422647	0.286293	NO	OK	38.4002	52.3195	0.446233	0.243451	NO	OK	38.4002	53.3381	0.474051	0.243009	NO	OK			TRAIP	CHR3	49866027	49907369	9.93891	9.97293
	MPP7	1.30478	0.622594	0.392678		TCF4	-0.883571	-1.02808	-1.2152											NEFH	CHR22	29876180	29887281	5.88102	39.6663	2.75377	0.000821971	YES	OK	5.88102	42.6311	2.85777	0.000821971	YES	OK	5.88102	50.885	3.1131	0.000821971	YES	OK			GDAP1	CHR8	75262617	75279335	5.50908	4.41771
	MTFR1	0.581014	0.64988	0.332474		STAU2	-0.609283	-0.760491	-1.21398											NFKB2	CHR10	104153807	104192423	16.0873	24.8571	0.627732	0.496613	NO	OK	16.0873	33.851	1.07327	0.15589	NO	OK	16.0873	47.669	1.56713	0.0377383	YES	OK			IFT57	CHR3	107879658	107941417	10.9575	7.09424
	MYBL2	1.4641	1.4995	1.46641		MORN2	-1.10771	-1.03926	-1.21308											NLRP12	CHR19	54296853	54327648	3.14332	3.14961	0.00288324	0.997572	NO	OK	3.14332	8.28382	1.39801	0.00998972	YES	OK	3.14332	6.97498	1.1499	0.0546289	NO	OK			SMAD1	CHR4	146402950	146480325	13.5243	8.64892
	MYO5B	1.22496	-0.186775	-0.930486		DHX40	-0.763305	-0.891488	-1.20842											NLRP2	CHR19	55476651	55512601	60.0744	223.516	1.89555	0.000821971	YES	OK	60.0744	246.599	2.03734	0.000821971	YES	OK	60.0744	211.85	1.81822	0.000821971	YES	OK			WASF1	CHR6	110420882	110501207	36.1151	21.0495
	NACA2	0.314772	0.331961	0.227689		EIF2AK2	-1.067	-0.856231	-1.19931											NLRP7	CHR19	55434688	55459039	0.662984	291.297	8.7793	0.000821971	YES	OK	0.662984	251.782	8.56899	0.000821971	YES	OK	0.662984	273.896	8.69044	0.000821971	YES	OK			AUTS2	CHR7	69063667	70258040	16.2972	22.9345
	NACAP1	0.239433	0.565673	0.328766		MFGE8	-1.44443	-0.657568	-1.1987											OSBPL11	CHR3	125247089	125314408	7.45041	10.367	0.476609	0.555701	NO	OK	7.45041	8.07516	0.116171	0.902546	NO	OK	7.45041	9.64374	0.372272	0.613853	NO	OK			PTPN13	CHR4	87515467	87736328	18.2984	10.8712
	NBAS	-0.457926	-0.234048	-0.290242		VIM	-0.513273	-0.578456	-1.1955											PAAF1	CHR11	73588032	73638930	15.724	11.9217	-0.399382	0.443659	NO	OK	15.724	16.385	0.0594092	0.95544	NO	OK	15.724	12.6932	-0.308919	0.619842	NO	OK			CIB2	CHR15	78396903	78423878	32.8393	17.9248
	NCOA4	0.422647	0.446233	0.474051		TRAIP	0.00492981	-0.796057	-1.19107											PACSIN2	CHR22	43265678	43411184	34.2029	49.1561	0.523254	0.14631	NO	OK	34.2029	47.664	0.478783	0.194396	NO	OK	34.2029	45.5357	0.412879	0.34299	NO	OK			UCP2	CHR11	73685715	73693889	167.21	78.952
	NEFH	2.75377	2.85777	3.1131		GDAP1	-0.318513	-0.575491	-1.17927											PFKL	CHR21	45719902	45759285	62.6759	122.307	0.964518	0.00809752	YES	OK	62.6759	104.18	0.733092	0.0287621	YES	OK	62.6759	94.418	0.59115	0.153654	NO	OK			PPP3CA	CHR4	101944586	102268790	3.93351	1.7142
	NFKB2	0.627732	1.07327	1.56713		IFT57	-0.627198	-0.886232	-1.17545											PGM2	CHR4	37828281	37864559	7.30911	17.8914	1.2915	0.000821971	YES	OK	7.30911	15.9977	1.13009	0.000821971	YES	OK	7.30911	13.8956	0.926862	0.00857464	YES	OK			NLGN2	CHR17	7308184	7323179	9.38953	4.15027
	NLRP12	0.00288324	1.39801	1.1499		SMAD1	-0.644959	-0.791179	-1.17364											PIGP	CHR21	38437543	38445458	20.0674	8.26167	-1.28035	0.00809752	YES	OK	20.0674	15.8382	-0.341444	0.569132	NO	OK	20.0674	16.6382	-0.270359	0.714884	NO	OK			JUNB	CHR19	12892659	12912694	85.2029	18.1915
	NLRP2	1.89555	2.03734	1.81822		WASF1	-0.778818	-0.924383	-1.13434											PLEC	CHR8	144989258	145050913	31.6721	48.0123	0.600191	0.220427	NO	OK	31.6721	51.655	0.705696	0.0396908	YES	OK	31.6721	57.3894	0.857571	0.0226815	YES	OK			MLLT11	CHR1	151020215	151041200	141.817	97.508
	NLRP7	8.7793	8.56899	8.69044		AUTS2	0.492895	-0.502337	-1.13158											PLXND1	CHR3	129274055	129325641	22.0875	10.6588	-1.05119	0.0118209	YES	OK	22.0875	17.9372	-0.300275	0.647385	NO	OK	22.0875	28.0692	0.34576	0.599286	NO	OK			GNG4	CHR1	235700623	235814054	72.1632	40.6865
	OSBPL11	0.476609	0.116171	0.372272		PTPN13	-0.751213	-0.874283	-1.1141											PPP1R2	CHR3	195241220	195270224	11.2334	11.3112	0.00996316	0.990714	NO	OK	11.2334	11.4526	0.0278807	0.977567	NO	OK	11.2334	11.4965	0.0333989	0.97391	NO	OK			TRAF5	CHR1	211499956	211548345	4.53693	2.48807
	PAAF1	-0.399382	0.0594092	-0.308919		CIB2	-0.873471	-0.803052	-1.10296											PPP2R5A	CHR1	212458714	212535276	7.69448	13.4853	0.809489	0.0144077	YES	OK	7.69448	18.2863	1.24886	0.000821971	YES	OK	7.69448	16.0836	1.06369	0.0021786	YES	OK			PCDHB5	CHR5	140474173	140591698	13.1639	7.9017
	PACSIN2	0.523254	0.478783	0.412879		UCP2	-1.08261	-0.761035	-1.09902											PQLC1	CHR18	77662291	77711653	48.4684	42.0249	-0.205802	0.761131	NO	OK	48.4684	32.2195	-0.589112	0.107308	NO	OK	48.4684	35.9405	-0.431434	0.3622	NO	OK			USP4	CHR3	49314576	49377585	16.6573	10.3061
	PFKL	0.964518	0.733092	0.59115		PPP3CA	-1.19828	-0.528823	-1.09901											PQLC3	CHR2	11295531	11319076	9.10909	22.9378	1.33235	0.000821971	YES	OK	9.10909	44.0402	2.27344	0.000821971	YES	OK	9.10909	39.2637	2.10782	0.000821971	YES	OK			IFNGR2	CHR21	34775201	34852316	31.971	13.8296
	PGM2	1.2915	1.13009	0.926862		NLGN2	-1.17785	-1.19384	-1.08624											PSME4	CHR2	54091203	54197977	3.6707	4.6918	0.354084	0.515273	NO	OK	3.6707	5.77707	0.654281	0.1103	NO	OK	3.6707	5.13329	0.483826	0.331938	NO	OK			E2F5	CHR8	86089208	86132643	36.1869	26.2328
	PIGP	-1.28035	-0.341444	-0.270359		JUNB	-2.22764	-1.96487	-1.08185											PTTG3P	CHR8	67579786	67774259	29.0034	35.5989	0.295612	0.795508	NO	OK	29.0034	42.6216	0.555364	0.438243	NO	OK	29.0034	33.7555	0.218901	0.855945	NO	OK			TFDP2	CHR3	141663269	141868386	16.5019	9.08294
	PLEC	0.600191	0.705696	0.857571		MLLT11	-0.540434	-0.470069	-1.07725											PYGB	CHR20	25228705	25371618	79.9427	187.854	1.23257	0.0027796	YES	OK	79.9427	160.169	1.00255	0.00503443	YES	OK	79.9427	216.179	1.43519	0.000821971	YES	OK			QDPR	CHR4	17468665	17513857	24.8175	15.9993
	PLXND1	-1.05119	-0.300275	0.34576		GNG4	-0.826714	-0.462484	-1.0672											PYGL	CHR14	51338877	51411344	22.0132	61.3544	1.4788	0.00905411	YES	OK	22.0132	61.5187	1.48266	0.0269711	YES	OK	22.0132	57.2162	1.37806	0.0219334	YES	OK			AES	CHR19	3052906	3062964	45.2907	18.6028
	PPP1R2	0.00996316	0.0278807	0.0333989		TRAF5	-0.866692	-0.820672	-1.05561											RAB15	CHR14	65381078	65569264	14.4373	47.0104	1.70318	0.0437187	YES	OK	14.4373	25.9265	0.844623	0.406657	NO	OK	14.4373	28.1044	0.960995	0.389011	NO	OK			PON2	CHR7	95031876	95064384	40.5833	18.2922
	PPP2R5A	0.809489	1.24886	1.06369		PCDHB5	-0.736358	-0.994189	-1.0529											RAB6A	CHR11	73386682	73472266	26.4314	40.6486	0.620956	0.084776	NO	OK	26.4314	46.5794	0.81744	0.00662594	YES	OK	26.4314	44.1821	0.741211	0.0364604	YES	OK			FBXL5	CHR4	15606006	15657035	27.6605	20.4094
	PQLC1	-0.205802	-0.589112	-0.431434		USP4	-0.692658	-0.700053	-1.05213											RAD51	CHR15	40987326	41026883	19.3707	54.032	1.47994	0.000821971	YES	OK	19.3707	39.5703	1.03054	0.000821971	YES	OK	19.3707	35.7499	0.884063	0.0215455	YES	OK			ROR1	CHR1	64239689	64644707	6.13225	4.12635
	PQLC3	1.33235	2.27344	2.10782		IFNGR2	-1.209	-0.786998	-1.04184											RAP1A	CHR1	112162404	112256105	6.24702	9.05981	0.536312	0.250951	NO	OK	6.24702	8.45244	0.436201	0.389664	NO	OK	6.24702	7.5898	0.280894	0.673377	NO	OK			CYLD	CHR16	50775960	50835846	1.4209	1.27813
	PSME4	0.354084	0.654281	0.483826		E2F5	-0.464097	-0.547303	-1.03093											RAP1GDS1	CHR4	99182525	99365012	8.36149	10.3498	0.307772	0.530915	NO	OK	8.36149	9.15039	0.130073	0.85934	NO	OK	8.36149	7.83531	-0.0937703	0.918913	NO	OK			ANP32A	CHR15	69070007	69113261	30.5169	26.5307
	PTTG3P	0.295612	0.555364	0.218901		TFDP2	-0.861399	-0.945072	-1.02664											RBM23	CHR14	23369786	23388396	42.5907	40.9828	-0.0555195	0.950819	NO	OK	42.5907	31.7573	-0.423449	0.302724	NO	OK	42.5907	29.5106	-0.529306	0.181092	NO	OK			RABGAP1	CHR9	125703287	125867148	22.282	13.3515
	PYGB	1.23257	1.00255	1.43519		QDPR	-0.633346	-0.382683	-1.02517											REEP1	CHR2	86441118	86565206	1.30641	4.37993	1.74531	0.000821971	YES	OK	1.30641	2.19325	0.747465	0.125535	NO	OK	1.30641	1.56073	0.256622	0.771038	NO	OK			CDS2	CHR20	5107406	5178533	17.4692	10.1932
	PYGL	1.4788	1.48266	1.37806		AES	-1.28369	-0.523671	-1.00486											REEP5	CHR5	112196884	112258031	85.2621	89.6557	0.0724912	0.965041	NO	OK	85.2621	113.155	0.408322	0.645854	NO	OK	85.2621	118.183	0.471051	0.606542	NO	OK			CLU	CHR8	27454433	27472328	159.723	62.5112
	RAB15	1.70318	0.844623	0.960995		PON2	-1.14966	-0.878051	-0.994931											RHPN2	CHR19	33469497	33555824	4.94356	8.11257	0.714608	0.0676359	NO	OK	4.94356	8.82244	0.835626	0.0241183	YES	OK	4.94356	10.3037	1.05953	0.00905411	YES	OK			SNAPIN	CHR1	153631144	153666468	97.2104	50.8314
	RAB6A	0.620956	0.81744	0.741211		FBXL5	-0.438592	-0.744534	-0.992594											RIN2	CHR20	19867164	19983103	2.20941	1.92721	-0.197149	0.907803	NO	OK	2.20941	1.07666	-1.0371	0.261304	NO	OK	2.20941	1.17751	-0.907928	0.362281	NO	OK			FANCL	CHR2	58273654	58468550	27.0426	16.1949
	RAD51	1.47994	1.03054	0.884063		ROR1	-0.571551	-0.667146	-0.984934											RNF125	CHR18	29598364	29668076	1.90063	16.3005	3.10036	0.000821971	YES	OK	1.90063	15.7361	3.04953	0.000821971	YES	OK	1.90063	17.8191	3.22888	0.000821971	YES	OK			HSDL1	CHR16	84155645	84178800	17.9214	11.1082
	RAP1A	0.536312	0.436201	0.280894		CYLD	-0.15277	-0.660111	-0.984414											RPP38	CHR10	15136578	15146258	23.0126	31.42	0.449261	0.358559	NO	OK	23.0126	36.9142	0.681755	0.0798094	NO	OK	23.0126	37.6988	0.712097	0.0927005	NO	OK			MAPK12	CHR22	50691312	50708779	1.84427	1.32284
	RAP1GDS1	0.307772	0.130073	-0.0937703		ANP32A	-0.201943	-0.407894	-0.97905											S100A14	CHR1	153586731	153588808	0.12547	4.83117	5.26695	0.0823319	NO	OK	0.12547	14.3966	6.84224	0.0823319	NO	OK	0.12547	24.9384	7.63488	0.112956	NO	OK			UBXN2B	CHR8	59323822	59364353	6.3814	7.34142
	RBM23	-0.0555195	-0.423449	-0.529306		RABGAP1	-0.738877	-0.515242	-0.97744											S100A6	CHR1	153507075	153508717	748.063	34.1238	-4.45431	0.000821971	YES	OK	748.063	168.949	-2.14657	0.000821971	YES	OK	748.063	199.53	-1.90656	0.000821971	YES	OK			RAB39B	CHRX	154487525	154493852	2.24335	2.23164
	REEP1	1.74531	0.747465	0.256622		CDS2	-0.777215	-0.681085	-0.969752											SEPHS2	CHR16	30454951	30457224	46.8084	112.054	1.25936	0.000821971	YES	OK	46.8084	77.3367	0.724386	0.0196415	YES	OK	46.8084	80.5285	0.782734	0.0230298	YES	OK			ENPP2	CHR8	120569316	120685617	3.12072	6.47751
	REEP5	0.0724912	0.408322	0.471051		CLU	-1.35338	-1.04673	-0.962688											SERPINB1	CHR6	2832563	2842198	13.0404	10.6549	-0.291466	0.663299	NO	OK	13.0404	10.9943	-0.246228	0.730683	NO	OK	13.0404	12.7529	-0.0321575	0.979722	NO	OK			ZNF618	CHR9	116638489	116818875	2.90736	1.59916
	RHPN2	0.714608	0.835626	1.05953		SNAPIN	-0.935391	-0.781	-0.960088											SERPINB6	CHR6	2948390	2972399	7.0207	62.3142	3.14987	0.000821971	YES	OK	7.0207	73.4052	3.3862	0.000821971	YES	OK	7.0207	80.9371	3.52711	0.000821971	YES	OK			SPRY4	CHR5	141689938	141704620	20.926	4.98773
	RIN2	-0.197149	-1.0371	-0.907928		FANCL	-0.739698	-0.732308	-0.959736											SH3BP4	CHR2	235860627	235964358	32.3801	26.9	-0.267501	0.565816	NO	OK	32.3801	26.2759	-0.301365	0.496418	NO	OK	32.3801	25.6357	-0.336951	0.473152	NO	OK			NLGN4Y	CHRY	16634487	16957448	9.19179	3.41112
	RNF125	3.10036	3.04953	3.22888		HSDL1	-0.690058	-0.730887	-0.956257											SHISA5	CHR3	48488141	48541667	233.944	271.336	0.213917	0.739416	NO	OK	233.944	240.249	0.0383659	0.969005	NO	OK	233.944	243.531	0.0579419	0.955389	NO	OK			ERGIC1	CHR5	172261195	172379689	13.1328	7.91772
	RPP38	0.449261	0.681755	0.712097		MAPK12	-0.479417	-0.750436	-0.931948											SLC25A16	CHR10	70239480	70287284	4.62467	20.4302	2.14328	0.000821971	YES	OK	4.62467	19.4796	2.07454	0.000821971	YES	OK	4.62467	24.3336	2.39553	0.000821971	YES	OK			PSIP1	CHR9	15464064	15511159	151.325	134.39
	S100A14	5.26695	6.84224	7.63488		UBXN2B	0.202187	-0.402329	-0.924364											SLC35A1	CHR6	88182642	88222105	16.1899	16.3792	0.0167639	0.988627	NO	OK	16.1899	13.7292	-0.237854	0.753885	NO	OK	16.1899	11.0164	-0.555449	0.294904	NO	OK			CCDC25	CHR8	27572613	27630170	16.8872	10.8987
	S100A6	-4.45431	-2.14657	-1.90656		RAB39B	-0.00755407	-0.147263	-0.923302											SLC7A7	CHR14	23242355	23290358	6.20793	3.63972	-0.770283	0.11358	NO	OK	6.20793	5.79754	-0.0986713	0.933715	NO	OK	6.20793	8.00046	0.365971	0.58823	NO	OK			SMARCA1	CHRX	128580445	128657489	29.1882	15.7304
	SEPHS2	1.25936	0.724386	0.782734		ENPP2	1.05356	-0.409464	-0.922997											SLK	CHR10	105726874	105788983	9.81551	11.496	0.227992	0.685114	NO	OK	9.81551	10.1125	0.0429989	0.963029	NO	OK	9.81551	9.16358	-0.0991525	0.909303	NO	OK			AVPI1	CHR10	99400442	99452295	3.0371	1.32791
	SERPINB1	-0.291466	-0.246228	-0.0321575		ZNF618	-0.862397	-0.94536	-0.92117											SMPDL3A	CHR6	123109970	123130932	1.51254	4.39824	1.53995	0.000821971	YES	OK	1.51254	4.30054	1.50754	0.000821971	YES	OK	1.51254	4.24981	1.49042	0.00336709	YES	OK			CHRNE	CHR17	4736570	4806369	2.68252	1.17843
	SERPINB6	3.14987	3.3862	3.52711		SPRY4	-2.06884	-0.870908	-0.919447											SNX6	CHR14	35030338	35099366	27.459	35.0144	0.350666	0.422345	NO	OK	27.459	28.3073	0.04389	0.963066	NO	OK	27.459	25.4576	-0.109183	0.88941	NO	OK			SBK1	CHR16	28303839	28335172	27.4292	22.4716
	SH3BP4	-0.267501	-0.301365	-0.336951		NLGN4Y	-1.4301	-1.16318	-0.91577											SNX8	CHR7	2291404	2354099	6.11422	9.11123	0.575479	0.196586	NO	OK	6.11422	8.04995	0.396813	0.436185	NO	OK	6.11422	8.71561	0.511434	0.306785	NO	OK			ZNF529	CHR19	37034516	37096178	8.24581	3.92108
	SHISA5	0.213917	0.0383659	0.0579419		ERGIC1	-0.730017	-0.561483	-0.910087											SOAT1	CHR1	179262848	179327818	11.7434	11.4346	-0.0384549	0.968878	NO	OK	11.7434	11.4877	-0.0317633	0.973671	NO	OK	11.7434	17.0518	0.538073	0.169431	NO	OK			PTK7	CHR6	43044028	43129457	83.3628	33.4317
	SLC25A16	2.14328	2.07454	2.39553		PSIP1	-0.171224	-0.735744	-0.908183											SPHK1	CHR17	74379590	74383941	3.04288	4.1892	0.461238	0.623557	NO	OK	3.04288	10.0007	1.71659	0.00449282	YES	OK	3.04288	11.2751	1.88964	0.00449282	YES	OK			HES1	CHR3	193853930	193856401	14.9312	1.40653
	SLC35A1	0.0167639	-0.237854	-0.555449		CCDC25	-0.631781	-0.598435	-0.906696											ST6GAL1	CHR3	186648314	186796343	27.2945	52.6395	0.947534	0.0027796	YES	OK	27.2945	45.424	0.734843	0.0325327	YES	OK	27.2945	40.4227	0.566552	0.161791	NO	OK			PPAPDC2	CHR9	4598315	4666674	5.46173	2.98373
	SLC7A7	-0.770283	-0.0986713	0.365971		SMARCA1	-0.891831	-0.609997	-0.905317											ST6GALNAC1	CHR17	74610018	74656329	1.65564	2.18589	0.400831	0.820211	NO	OK	1.65564	4.34913	1.39334	0.130266	NO	OK	1.65564	4.83836	1.54713	0.115979	NO	OK			PGPEP1	CHR19	18451407	18480763	0.97635	0.764777
	SLK	0.227992	0.0429989	-0.0991525		AVPI1	-1.19354	-0.705633	-0.904282											ST6GALNAC3	CHR1	76540388	77097328	15.4397	6.06721	-1.34754	0.251585	NO	OK	15.4397	6.11081	-1.33721	0.0479787	YES	OK	15.4397	4.05359	-1.92938	0.0015311	YES	OK			CREB1	CHR2	208394615	208490114	4.32119	4.31529
	SMPDL3A	1.53995	1.50754	1.49042		CHRNE	-1.18673	-0.776383	-0.902256											STS	CHRX	7137471	7272682	1.31572	1.6277	0.306984	0.645494	NO	OK	1.31572	1.08787	-0.274353	0.713266	NO	OK	1.31572	1.05202	-0.322697	0.665518	NO	OK			NUDT11	CHRX	51232862	51239459	29.883	20.4572
	SNX6	0.350666	0.04389	-0.109183		SBK1	-0.287612	-0.361612	-0.896495											SUN3	CHR7	48026635	48068716	0.315889	6.60676	4.38645	0.000821971	YES	OK	0.315889	6.57329	4.37913	0.000821971	YES	OK	0.315889	7.76085	4.61873	0.000821971	YES	OK			ARMCX6	CHRX	100870107	100872991	6.19139	3.33602
	SNX8	0.575479	0.396813	0.511434		ZNF529	-1.07241	-1.32702	-0.895589											SUSD2	CHR22	24577443	24585178	6.28612	81.3349	3.69363	0.000821971	YES	OK	6.28612	117.734	4.22722	0.000821971	YES	OK	6.28612	177.583	4.82018	0.000821971	YES	OK			SNX1	CHR15	64388082	64436433	24.5584	16.8634
	SOAT1	-0.0384549	-0.0317633	0.538073		PTK7	-1.31819	-1.01573	-0.89289											TAF13	CHR1	109605050	109618685	3.25697	11.31	1.79599	0.000821971	YES	OK	3.25697	12.9341	1.98958	0.000821971	YES	OK	3.25697	14.1042	2.11452	0.000821971	YES	OK			TMEM98	CHR17	31254927	31268847	75.3391	31.9182
	SPHK1	0.461238	1.71659	1.88964		HES1	-3.40811	-1.5014	-0.892804											TAGLN2	CHR1	159887841	159895365	100.592	446.315	2.14955	0.000821971	YES	OK	100.592	696.464	2.79154	0.000821971	YES	OK	100.592	692.072	2.78241	0.000821971	YES	OK			IDS	CHRX	148560294	148586884	12.1458	6.64776
	ST6GAL1	0.947534	0.734843	0.566552		PPAPDC2	-0.872243	-0.780946	-0.886007											TAOK3	CHR12	118587605	118810750	2.91379	9.40783	1.69097	0.0131264	YES	OK	2.91379	6.14107	1.07559	0.227681	NO	OK	2.91379	7.26801	1.31867	0.11358	NO	OK			OAZ2	CHR15	64791618	64995462	130.861	91.0351
	ST6GALNAC1	0.400831	1.39334	1.54713		PGPEP1	-0.352359	-0.137006	-0.884718											TBX3	CHR12	115108058	115121969	0.148546	0.895109	2.59115	0.0027796	YES	OK	0.148546	1.69874	3.51548	0.000821971	YES	OK	0.148546	3.77631	4.66799	0.000821971	YES	OK			ANGPTL6	CHR19	10196805	10213425	1.7803	0.201476
	ST6GALNAC3	-1.34754	-1.33721	-1.92938		CREB1	-0.00196995	-0.509679	-0.884107											TFCP2L1	CHR2	121974163	122042778	0.079959	6.24769	6.28792	0.000821971	YES	OK	0.079959	5.01416	5.9706	0.000821971	YES	OK	0.079959	4.79555	5.90629	0.000821971	YES	OK			PDE7A	CHR8	66626568	66754200	10.0704	7.89519
	STS	0.306984	-0.274353	-0.322697		NUDT11	-0.546718	-0.599107	-0.882624											TMBIM1	CHR2	219135114	219211518	38.0911	38.3765	0.0107677	0.992235	NO	OK	38.0911	44.4474	0.222643	0.779453	NO	OK	38.0911	59.4225	0.641554	0.207249	NO	OK			ZNF462	CHR9	109625377	109848716	2.69392	1.70075
	SUN3	4.38645	4.37913	4.61873		ARMCX6	-0.892136	-0.788194	-0.878											TMC7	CHR16	18995255	19112098	4.34472	2.58173	-0.750925	0.391066	NO	OK	4.34472	4.76001	0.131702	0.93671	NO	OK	4.34472	5.77165	0.409721	0.684533	NO	OK			CYYR1	CHR21	27838527	27945617	12.7519	9.20306
	SUSD2	3.69363	4.22722	4.82018		SNX1	-0.542322	-0.590556	-0.872772											TMEM104	CHR17	72772621	72835922	10.6164	12.2718	0.209056	0.786364	NO	OK	10.6164	10.9531	0.045044	0.970437	NO	OK	10.6164	12.9004	0.281125	0.710668	NO	OK			CCDC88A	CHR2	55514950	55647057	8.81217	6.86442
	TAF13	1.79599	1.98958	2.11452		TMEM98	-1.23902	-0.860573	-0.872294											TPCN2	CHR11	68816349	68859026	12.8818	15.0535	0.224758	0.799773	NO	OK	12.8818	23.5849	0.872526	0.0568705	NO	OK	12.8818	33.9686	1.39886	0.0021786	YES	OK			CXXC5	CHR5	139027880	139063469	55.9522	19.0453
	TAGLN2	2.14955	2.79154	2.78241		IDS	-0.869522	-0.700441	-0.867028											TRIM60	CHR4	165953150	165962905	0.0170107	1.35841	6.31934	0.544505	NO	OK	0.0170107	3.70173	7.76562	0.544505	NO	OK	0.0170107	5.00355	8.20037	0.55764	NO	OK			CHN1	CHR2	175664031	175870337	14.2036	14.2321
	TAOK3	1.69097	1.07559	1.31867		OAZ2	-0.523541	-0.487019	-0.866937											TSPAN13	CHR7	16793350	16824428	16.2503	30.8383	0.924257	0.0027796	YES	OK	16.2503	33.4833	1.04298	0.000821971	YES	OK	16.2503	33.8004	1.05657	0.0015311	YES	OK			FAT1	CHR4	187508811	187647746	5.26032	2.9943
	TBX3	2.59115	3.51548	4.66799		ANGPTL6	-3.14344	-1.16217	-0.864349											TSPAN18	CHR11	44748492	44972608	34.737	6.37869	-2.44514	0.00857464	YES	OK	34.737	9.62424	-1.85173	0.0679219	NO	OK	34.737	9.06249	-1.93849	0.0661055	NO	OK			AGTPBP1	CHR9	88161129	88356944	28.8975	24.5078
	TFCP2L1	6.28792	5.9706	5.90629		PDE7A	-0.351081	-0.499197	-0.856496											TTLL4	CHR2	219575567	219620138	23.5167	30.9721	0.397287	0.589068	NO	OK	23.5167	20.3671	-0.207446	0.781622	NO	OK	23.5167	20.4425	-0.202114	0.821518	NO	OK			BDH2	CHR4	103941088	104021024	7.91886	6.06812
	TMBIM1	0.0107677	0.222643	0.641554		ZNF462	-0.663537	-0.712448	-0.855367											UACA	CHR15	70946892	71055861	28.2562	38.1853	0.434448	0.524741	NO	OK	28.2562	34.6038	0.292364	0.725816	NO	OK	28.2562	36.172	0.356306	0.667659	NO	OK			SEL1L3	CHR4	25749048	25864610	2.14318	1.2729
	TMC7	-0.750925	0.131702	0.409721		CYYR1	-0.470529	-0.388557	-0.852651											UBASH3B	CHR11	122526397	122685187	0.513618	3.99597	2.95978	0.000821971	YES	OK	0.513618	3.90174	2.92535	0.000821971	YES	OK	0.513618	5.25897	3.35601	0.000821971	YES	OK			FAM171A1	CHR10	15241147	15467135	24.4961	17.93
	TMEM104	0.209056	0.045044	0.281125		CCDC88A	-0.360361	-0.476444	-0.850877											UGCG	CHR9	114658912	114697800	24.2986	26.574	0.129147	0.928544	NO	OK	24.2986	32.1421	0.403596	0.523163	NO	OK	24.2986	44.7976	0.882549	0.0973093	NO	OK			CDK5R1	CHR17	30814104	30818271	7.69769	3.78605
	TPCN2	0.224758	0.872526	1.39886		CXXC5	-1.55476	-0.451721	-0.845099											VPS37C	CHR11	60897727	60928916	18.1748	15.9775	-0.185894	0.777922	NO	OK	18.1748	15.6368	-0.216989	0.716258	NO	OK	18.1748	14.0869	-0.367578	0.483407	NO	OK			ARID1B	CHR6	157098932	157531930	10.6945	7.84161
	TRIM60	6.31934	7.76562	8.20037		CHN1	0.00288399	-0.41405	-0.832809											YPEL2	CHR17	57409052	57479095	0.967129	2.21105	1.19295	0.00857464	YES	OK	0.967129	1.97345	1.02894	0.0237478	YES	OK	0.967129	3.32327	1.78082	0.000821971	YES	OK			PBX1	CHR1	164528596	164821069	8.93266	6.32389
	TSPAN13	0.924257	1.04298	1.05657		FAT1	-0.812931	-0.706196	-0.824102											ZBTB10	CHR8	81398447	81439392	3.72924	4.99689	0.422149	0.384378	NO	OK	3.72924	3.55124	-0.0705581	0.949739	NO	OK	3.72924	3.64661	-0.0323234	0.978401	NO	OK			SNN	CHR16	11762263	11836709	50.9059	44.027
	TSPAN18	-2.44514	-1.85173	-1.93849		AGTPBP1	-0.237707	-0.497335	-0.819287											ZBTB33	CHRX	119384606	119392251	5.31598	4.20941	-0.336719	0.495646	NO	OK	5.31598	2.95701	-0.846198	0.016861	YES	OK	5.31598	2.68128	-0.987414	0.00503443	YES	OK			TRAPPC6A	CHR19	45666140	45681547	77.472	35.5886
	TTLL4	0.397287	-0.207446	-0.202114		BDH2	-0.384043	-0.547004	-0.818987											ZNF593	CHR1	26496387	26497364	85.0991	125.197	0.556981	0.193843	NO	OK	85.0991	104.649	0.298337	0.577322	NO	OK	85.0991	141.134	0.72985	0.0616066	NO	OK			DPY19L3	CHR19	32896654	32976801	5.46643	4.78415
	UACA	0.434448	0.292364	0.356306		SEL1L3	-0.751635	0.285106	-0.818405											ZNF823	CHR19	11832058	11849760	3.7245	3.94668	0.0835913	0.941	NO	OK	3.7245	4.28623	0.20266	0.800909	NO	OK	3.7245	5.48393	0.558162	0.282583	NO	OK			DCBLD2	CHR3	98514813	98620533	18.8968	12.1362
	UBASH3B	2.95978	2.92535	3.35601		FAM171A1	-0.450177	-0.572836	-0.812677																																			KIAA1467	CHR12	13197314	13236383	6.90674	3.59844
	UGCG	0.129147	0.403596	0.882549		CDK5R1	-1.02373	-0.834824	-0.81263																																			SCARB2	CHR4	77079883	77135168	19.8709	10.2656
	VPS37C	-0.185894	-0.216989	-0.367578		ARID1B	-0.447643	-0.631385	-0.812161																																			CRIP2	CHR14	105941126	105946502	47.4467	18.0978
	YPEL2	1.19295	1.02894	1.78082		PBX1	-0.498277	-0.785332	-0.811909																																			CRISPLD1	CHR8	75896707	75946793	7.91846	4.16027
	ZBTB10	0.422149	-0.0705581	-0.0323234		SNN	-0.209444	-0.485796	-0.80182																																			KLHL28	CHR14	45393493	45431179	10.9185	7.18221
	ZBTB33	-0.336719	-0.846198	-0.987414		TRAPPC6A	-1.12226	-0.5515	-0.801278																																			GINS2	CHR16	85645028	85722615	59.4974	59.9509
	ZNF593	0.556981	0.298337	0.72985		DPY19L3	-0.192334	-0.407435	-0.795969																																			TRIM36	CHR5	114460458	114516243	2.87635	2.45817
	ZNF823	0.0835913	0.20266	0.558162		DCBLD2	-0.638817	-0.504209	-0.791417																																			ANAPC13	CHR3	134196449	134293855	91.8592	62.3492
						KIAA1467	-0.940634	-0.725755	-0.791327																																			ARRB2	CHR17	4613788	4627625	28.0856	15.081
						SCARB2	-0.952833	-0.596486	-0.787682																																			AACS	CHR12	125549924	125627874	18.4567	12.1723
						CRIP2	-1.39049	-0.708392	-0.786136																																			SLC43A3	CHR11	57174425	57195053	17.6952	6.88466
						CRISPLD1	-0.928544	-0.477861	-0.779448																																			CRMP1	CHR4	5822481	5894785	103.865	73.3969
						KLHL28	-0.604275	-0.850767	-0.778227																																			OGG1	CHR3	9791627	9811668	17.7213	13.302
						GINS2	0.0109552	-0.513883	-0.772019																																			DPYSL3	CHR5	146770367	146889619	17.9644	36.9471
						TRIM36	-0.226657	-0.744005	-0.762122																																			ZNF711	CHRX	84498996	84528451	6.63782	5.8013
						ANAPC13	-0.559053	-0.593676	-0.750109																																			TUBD1	CHR17	57936839	57970306	8.82045	6.73904
						ARRB2	-0.897102	-0.821498	-0.743071																																			CHD4	CHR12	6679163	6716583	42.131	26.5689
						AACS	-0.600537	-0.34762	-0.732447																																			DECR1	CHR8	91013579	91064307	33.4795	22.3317
						SLC43A3	-1.3619	-1.01672	-0.731819																																			SMARCD1	CHR12	50478982	50494494	39.3901	30.6068
						CRMP1	-0.500923	-0.174455	-0.727502																																			THYN1	CHR11	134118156	134123260	72.4204	63.5116
						OGG1	-0.413836	-0.601973	-0.727117																																			SSBP4	CHR19	18530145	18549111	70.8104	36.7905
						DPYSL3	1.04033	-0.163716	-0.72201																																			MADD	CHR11	47290926	47351586	7.30736	5.37638
						ZNF711	-0.194332	-0.346302	-0.709479																																			SCG3	CHR15	51973549	52013223	3.61419	4.30525
						TUBD1	-0.38831	-0.767846	-0.702814																																			STXBP1	CHR9	130374485	130457291	17.2813	11.6417
						CHD4	-0.665143	-0.617213	-0.699662																																			ID1	CHR20	30192991	30213487	83.1954	59.0856
						DECR1	-0.584181	-0.4877	-0.69852																																			ZBTB39	CHR12	57392616	57400297	5.72989	5.23389
						SMARCD1	-0.363979	-0.469925	-0.670443																																			CAMK2G	CHR10	75572182	75634349	5.0565	3.38594
						THYN1	-0.189375	-0.201095	-0.665535																																			ZBTB4	CHR17	7362684	7387568	4.29774	2.80829
						SSBP4	-0.944628	-0.907018	-0.663201																																			TMEM60	CHR7	77423044	77427747	47.6272	25.8265
						MADD	-0.442717	-0.428591	-0.660527																																			LARGE	CHR22	33669061	34316965	14.0666	7.00421
						SCG3	0.252422	0.259472	-0.65548																																			COG7	CHR16	23399581	23467100	4.35326	2.94317
						STXBP1	-0.569902	-0.313341	-0.652755																																			COTL1	CHR16	84599198	84651692	156.539	86.2617
						ID1	-0.493698	-0.428757	-0.651322																																			LITAF	CHR16	11631565	11681322	20.9758	20.8034
						ZBTB39	-0.130625	-0.397647	-0.649031																																			GFOD2	CHR16	67708435	67753273	17.947	14.407
						CAMK2G	-0.578581	-0.523371	-0.648897																																			CSNK1E	CHR22	38686689	38714089	134.235	103.117
						ZBTB4	-0.613889	-0.590346	-0.646043																																			PDPR	CHR16	70147528	70196439	10.8541	5.96911
						TMEM60	-0.882932	-0.559999	-0.644674																																			UBQLN2	CHRX	56590025	56593443	26.0506	25.0871
						LARGE	-1.00599	-0.634403	-0.642787																																			MAPK8IP1	CHR11	45907046	45928016	5.50402	5.40353
						COG7	-0.564726	-0.925189	-0.638104																																			FAM174A	CHR5	99871085	99931958	1.56429	0.533163
						COTL1	-0.859726	-0.580245	-0.637917																																			PPOX	CHR1	161136180	161141010	51.8274	36.7112
						LITAF	-0.0119108	-0.111956	-0.632333																																			LYPLAL1	CHR1	219347191	219386852	31.0215	16.5516
						GFOD2	-0.316971	-0.776442	-0.629606																																			CRABP2	CHR1	156669359	156682111	714.88	185.094
						CSNK1E	-0.380476	-0.520305	-0.623203																																			YPEL3	CHR16	30103632	30107575	33.422	19.5958
						PDPR	-0.862656	-0.394885	-0.621212																																			GLI2	CHR2	121493438	121750229	5.41773	5.3475
						UBQLN2	-0.0543682	-0.416672	-0.618758																																			GTPBP1	CHR22	39101806	39129690	17.7271	12.1904
						MAPK8IP1	-0.0265825	-0.244115	-0.610477																																			USP12	CHR13	27639146	27746033	1.58375	1.40346
						FAM174A	-1.55286	0.905032	-0.608573																																			ACAD8	CHR11	134123433	134135951	33.3697	22.2744
						PPOX	-0.497496	-0.182032	-0.599243																																			KLC1	CHR14	104095524	104181823	79.8319	71.429
						LYPLAL1	-0.906296	-0.13645	-0.592401																																			TNNT1	CHR19	55644086	55660606	147.395	40.7304
						CRABP2	-1.94945	-0.828604	-0.588019																																			SLC26A2	CHR5	149340299	149366964	1.37481	0.904923
						YPEL3	-0.770252	-0.563384	-0.583958																																			MBTPS1	CHR16	84087288	84150517	30.0833	21.9791
						GLI2	-0.0188233	-0.206234	-0.583058																																			THY1	CHR11	119252487	119369944	156.636	28.8124
						GTPBP1	-0.540209	-0.603804	-0.57867																																			KIAA1147	CHR7	141356527	141401953	1.01787	1.3499
						USP12	-0.174353	-0.0467513	-0.572396																																			SRI	CHR7	87834431	87856308	48.1537	72.2094
						ACAD8	-0.583151	-0.323117	-0.569264																																			LRP1	CHR12	57522281	57607175	5.59913	2.34445
						KLC1	-0.160455	-0.358708	-0.567596																																			FPGS	CHR9	130565153	130576556	59.233	52.8839
						TNNT1	-1.85551	-0.98108	-0.565842																																			CISD2	CHR4	103790134	103940896	8.43472	8.63383
						SLC26A2	-0.603365	-0.681699	-0.564984																																			CHCHD6	CHR3	126423117	126679244	26.7001	23.7397
						MBTPS1	-0.452829	-0.388948	-0.558297																																			NUDT10	CHRX	51075082	51080377	12.3359	10.1365
						THY1	-2.44266	0.0303123	-0.541713																																			MAP3K3	CHR17	61699781	61777534	11.9957	10.0802
						KIAA1147	0.407304	0.071029	-0.541159																																			TUB	CHR11	8060179	8190590	1.85528	1.50208
						SRI	0.584539	-0.130424	-0.540977																																			CERK	CHR22	47080306	47134152	26.7343	26.2062
						LRP1	-1.25595	-0.505049	-0.539154																																			METTL3	CHR14	21945334	22005337	36.0501	30.6751
						FPGS	-0.163574	-0.418117	-0.527617																																			IFT46	CHR11	118307204	118436791	7.84795	7.64904
						CISD2	0.0336598	-0.35544	-0.515321																																			DZIP3	CHR3	108268717	108423249	11.6379	7.77816
						CHCHD6	-0.169549	-0.201403	-0.512314																																			SPG20	CHR13	36875774	36944317	15.0836	14.3024
						NUDT10	-0.2833	-0.345646	-0.511682																																			USP13	CHR3	179370660	179507195	4.85202	5.54194
						MAP3K3	-0.250994	-0.395967	-0.508737																																			RARG	CHR12	53604349	53626040	2.68551	1.71949
						TUB	-0.304675	-0.642181	-0.499804																																			WNK3	CHRX	54219160	54384448	1.42963	1.52836
						CERK	-0.0287857	-0.193301	-0.491441																																			STMN3	CHR20	62271059	62286439	42.2326	33.9205
						METTL3	-0.232936	-0.154384	-0.489603																																			ZBTB34	CHR9	129622943	129648156	2.32573	2.05807
						IFT46	-0.0370374	-0.176879	-0.472103																																			EPHA2	CHR1	16450830	16482582	27.5512	6.63929
						DZIP3	-0.581329	-0.186258	-0.4637																																			FAM117A	CHR17	47787686	47841518	35.8753	22.35
						SPG20	-0.076725	-0.24481	-0.46266																																			DCAF11	CHR14	24583905	24602801	18.5237	16.6097
						USP13	0.191804	-0.165403	-0.461913																																			NAP1L2	CHRX	72432136	72434710	1.79195	1.90688
						RARG	-0.643215	-0.526207	-0.459567																																			TFPT	CHR19	54605388	54635150	17.8717	15.3412
						WNK3	0.0963445	-0.232147	-0.456082																																			FBXO30	CHR6	145946439	146285518	5.81734	6.50287
						STMN3	-0.3162	0.0855335	-0.450244																																			QSER1	CHR11	32914743	33001819	2.59732	3.06731
						ZBTB34	-0.176397	-0.414297	-0.447493																																			AP2A2	CHR11	925808	1012245	40.3017	23.5053
						EPHA2	-2.05301	-0.980164	-0.445853																																			IGF1R	CHR15	99191747	99507761	7.96334	5.33729
						FAM117A	-0.682716	-0.301278	-0.444365																																			TBC1D4	CHR13	75858804	76056355	4.95246	6.06352
						DCAF11	-0.15735	-0.194436	-0.443779																																			HIF1A	CHR14	62162118	62215807	53.115	44.1714
						NAP1L2	0.0896784	-0.0327581	-0.442474																																			SLC36A4	CHR11	92877344	92931137	9.45728	9.63881
						TFPT	-0.220261	-0.323916	-0.441078																																			NOTCH2	CHR1	120454175	120612317	6.90543	5.51142
						FBXO30	0.160717	-0.138888	-0.440379																																			SCAMP5	CHR15	75287875	75313836	9.56225	10.8938
						QSER1	0.239949	-0.00642617	-0.435056																																			CCDC113	CHR16	58283839	58328951	3.37958	2.03728
						AP2A2	-0.777852	-1.30356	-0.433256																																			TCF3	CHR19	1609288	1652614	96.4816	98.012
						IGF1R	-0.577268	-0.273877	-0.426452																																			USP9X	CHRX	40944622	41095832	9.07477	8.26876
						TBC1D4	0.292009	0.00601975	-0.42432																																			ENTPD7	CHR10	101419262	101515962	2.70509	2.10066
						HIF1A	-0.266005	-0.191456	-0.420469																																			STX10	CHR19	13254871	13261150	37.7938	33.6589
						SLC36A4	0.0274296	-0.0669746	-0.391211																																			OSBPL2	CHR20	60813579	60871322	17.5198	12.1621
						NOTCH2	-0.325307	-0.420773	-0.384261																																			LPHN1	CHR19	14247963	14317761	13.2382	9.48227
						SCAMP5	0.188091	0.0312629	-0.38246																																			BCAR1	CHR16	75262757	75301951	38.4604	32.666
						CCDC113	-0.730201	-0.14354	-0.371411																																			TTL	CHR2	113239427	113295742	15.0182	19.7133
						TCF3	0.0227049	-0.210346	-0.362759																																			NT5DC2	CHR3	52529355	52575638	97.0951	82.4283
						USP9X	-0.13419	-0.261376	-0.360935																																			DYNLT1	CHR6	159057406	159065804	119.602	97.9668
						ENTPD7	-0.364834	-0.465756	-0.357472																																			ARID3B	CHR15	74833540	74890475	12.6591	12.8103
						STX10	-0.167161	-0.21963	-0.355379																																			FCGRT	CHR19	50010157	50029685	15.8122	12.3166
						OSBPL2	-0.526596	-0.369466	-0.350622																																			C16ORF87	CHR16	46835520	46865342	21.8429	22.3172
						LPHN1	-0.481402	-0.470456	-0.334274																																			ACER3	CHR11	76571916	76734850	2.71458	2.4775
						BCAR1	-0.235587	-0.36155	-0.330217																																			USP46	CHR4	53446759	53525502	5.14671	4.91238
						TTL	0.392456	-0.252106	-0.32933																																			OXCT1	CHR5	41730166	41870791	8.31635	9.54568
						NT5DC2	-0.236258	-0.0912111	-0.305169																																			HDAC7	CHR12	48166966	48213763	13.9521	6.45287
						DYNLT1	-0.287872	-0.104539	-0.299671																																			C3ORF14	CHR3	62304695	62319921	18.5623	25.3319
						ARID3B	0.0171303	-0.0541646	-0.296167																																			AK3	CHR9	4679565	4742043	31.0648	28.319
						FCGRT	-0.360434	-0.374881	-0.290278																																			TMEM55B	CHR14	20923289	20929778	45.7491	38.3306
						C16ORF87	0.0309858	-0.186954	-0.279027																																			MAT2A	CHR2	85764404	85788657	106.147	96.0123
						ACER3	-0.131844	-0.146849	-0.270263																																			LRRC8B	CHR1	89990054	90063420	5.1384	5.68435
						USP46	-0.0672267	-0.253383	-0.267452																																			MLF1	CHR3	158288952	158324966	20.3033	14.3497
						OXCT1	0.198898	0.115036	-0.266385																																			EMB	CHR5	49692030	49737234	7.31524	6.9386
						HDAC7	-1.11247	-0.309528	-0.257311																																			COX18	CHR4	73920415	73935489	6.98815	7.36335
						C3ORF14	0.448576	-0.186729	-0.256699																																			MINA	CHR3	97660619	97691295	8.34992	7.77369
						AK3	-0.133512	0.0536138	-0.256112																																			KLHL7	CHR7	23145352	23215038	26.4581	23.047
						TMEM55B	-0.255248	-0.176889	-0.254021																																			CCDC24	CHR1	44440498	44506103	6.81951	7.46945
						MAT2A	-0.14478	-0.285285	-0.244833																																			VOPP1	CHR7	55538305	55640200	2.07661	2.37726
						LRRC8B	0.145676	0.0167374	-0.240186																																			KBTBD6	CHR13	41701708	41706936	4.03767	4.26322
						MLF1	-0.500688	-0.0274115	-0.239351																																			ACOT9	CHRX	23720430	23761428	23.8422	16.275
						EMB	-0.0762611	0.0889401	-0.237442																																			GUK1	CHR1	228327784	228336657	230.744	225.616
						COX18	0.0754522	-0.146569	-0.232985																																			DUSP3	CHR17	41843488	41856368	11.6648	12.5391
						MINA	-0.103162	-0.188282	-0.232451																																			CEP192	CHR18	12947982	13125054	4.9476	4.56111
						KLHL7	-0.199129	-0.0988889	-0.231939																																			SNX13	CHR7	17830384	17980131	7.97707	7.07388
						CCDC24	0.131333	-0.0125272	-0.227413																																			GPX8	CHR5	54408798	54469005	9.70451	10.6098
						VOPP1	0.195068	0.192753	-0.226918																																			HSD11B2	CHR16	67454399	67515104	17.042	17.3486
						KBTBD6	0.0784178	-0.186264	-0.222998																																			AAGAB	CHR15	67493144	67819641	21.9975	23.923
						ACOT9	-0.550864	0.0295675	-0.218003																																			ING5	CHR2	242640242	242668896	18.7394	18.6685
						GUK1	-0.0324263	-0.235624	-0.216286																																			FOXJ3	CHR1	42642209	42801666	6.6762	7.90506
						DUSP3	0.104272	-0.0465779	-0.214001																																			FSD1	CHR19	4304590	4323900	42.7855	34.969
						CEP192	-0.117343	-0.125872	-0.213965																																			TRMT5	CHR14	61438158	61447783	6.43771	6.06045
						SNX13	-0.173357	-0.042588	-0.199198																																			PEX1	CHR7	92116291	92157845	9.69621	10.8773
						GPX8	0.128663	0.263732	-0.188566																																			TMSB4Y	CHRY	15814772	15818243	9.29682	9.10944
						HSD11B2	0.0257287	-1.0311	-0.187819																																			FKRP	CHR19	47222758	47261973	12.9788	9.14863
						AAGAB	0.121057	-0.108246	-0.186051																																			RTN4IP1	CHR6	107018902	107116292	8.40202	9.87849
						ING5	-0.00547467	-0.220156	-0.179437																																			ALDH9A1	CHR1	165600109	165667900	58.1166	46.44
						FOXJ3	0.243749	-0.128327	-0.168519																																			G6PC3	CHR17	42148097	42201015	117.242	95.1631
						FSD1	-0.291048	-0.153089	-0.16666																																			SNRNP27	CHR2	70121074	70132942	28.3033	33.0192
						TRMT5	-0.0871227	-0.0690299	-0.160937																																			COL1A2	CHR7	94023872	94060544	36.5412	13.2763
						PEX1	0.165829	0.321606	-0.160866																																			NAGK	CHR2	71295407	71305998	26.7645	41.3338
						TMSB4Y	-0.0293754	0.23904	-0.159929																																			SBF2	CHR11	9776316	10315754	6.22159	3.60608
						FKRP	-0.504527	-0.332181	-0.158873																																			IFI27L1	CHR14	94547638	94569060	30.7814	28.1875
						RTN4IP1	0.233554	0.139408	-0.148414																																			SEC23IP	CHR10	121652084	121704170	13.4553	14.8626
						ALDH9A1	-0.323582	0.110501	-0.147729																																			MINK1	CHR17	4736570	4806369	30.8383	26.5576
						G6PC3	-0.301016	-0.0904306	-0.146303																																			PAIP2B	CHR2	71409867	71454233	1.2393	1.67964
						SNRNP27	0.222336	0.13268	-0.145145																																			ZNF605	CHR12	133497906	133532892	1.2302	1.28982
						COL1A2	-1.46067	-0.0472694	-0.134904																																			SLC7A3	CHRX	70145426	70150975	16.1149	16.1146
						NAGK	0.627005	-0.0120491	-0.131458																																			LACE1	CHR6	108616097	108844251	1.27709	1.77971
						SBF2	-0.786854	-0.366543	-0.129726																																			UNC13A	CHR19	17712136	17799008	1.8328	1.28492
						IFI27L1	-0.127007	0.0556824	-0.10489																																			OCIAD2	CHR4	48887395	48908815	43.2364	11.9863
						SEC23IP	0.143506	-0.00900061	-0.0992123																																			MED17	CHR11	93517404	93546611	12.2041	14.9197
						MINK1	-0.215597	-0.462469	-0.0972615																																			DDX42	CHR17	61851283	61920367	20.0995	19.4008
						PAIP2B	0.438619	0.267704	-0.0921811																																			AKR1B1	CHR7	134118418	134143888	115.709	124.314
						ZNF605	0.0682818	0.137023	-0.0848192																																			KCTD3	CHR1	215715455	215795255	48.0846	39.694
						SLC7A3	-2.56e-05	0.616227	-0.0797412																																			UPF2	CHR10	11962020	12085169	4.54797	5.47189
						LACE1	0.47878	0.303629	-0.0770859																																			ADD2	CHR2	70887938	70995394	9.39922	13.4055
						UNC13A	-0.512367	0.853781	-0.0754937																																			ZNF286A	CHR17	15602890	15628789	5.86927	7.04271
						OCIAD2	-1.85086	0.113173	-0.0663357																																			SEC61A2	CHR10	12171639	12292589	10.2994	8.76788
						MED17	0.289856	-0.0123884	-0.0653591																																			TRIB1	CHR8	126442562	126450644	8.54733	6.77117
						DDX42	-0.0510395	0.00330652	-0.063859																																			SLC38A5	CHRX	48316924	48328644	27.2823	1.55275
						AKR1B1	0.103486	0.18893	-0.0637172																																			PPP1R16B	CHR20	37434347	37551667	2.04446	2.19992
						KCTD3	-0.276653	0.234483	-0.0545398																																			SORBS3	CHR8	22409250	22433010	26.2503	20.3302
						UPF2	0.266817	0.0197825	-0.0537832																																			FAN1	CHR15	31191687	31284099	7.77621	7.54756
						ADD2	0.512216	0.612565	-0.0527812																																			ME2	CHR18	48405431	48476162	9.7752	10.777
						ZNF286A	0.262949	0.092321	-0.0523399																																			MAP3K9	CHR14	71194784	71291117	5.41412	5.50642
						SEC61A2	-0.232258	-0.103597	-0.0519125																																			TM7SF3	CHR12	27124407	27167339	19.4771	17.4676
						TRIB1	-0.336068	0.0149037	-0.0485577																																			CDCA7L	CHR7	21582832	21985609	25.1264	41.623
						SLC38A5	-4.13507	-1.46301	-0.0370222																																			RFX1	CHR19	14041999	14117195	5.2837	5.35286
						PPP1R16B	0.105733	0.381753	-0.0330614																																			GULP1	CHR2	189156395	189460653	5.93844	7.07029
						SORBS3	-0.368708	-0.0596614	-0.0263603																																			UBL7	CHR15	74738312	74753551	63.5394	66.7048
						FAN1	-0.0430558	0.0186829	-0.0219405																																			TTC39C	CHR18	21572736	21715574	5.44791	3.07647
						ME2	0.140762	0.313483	-0.0189398																																			SV2A	CHR1	149874868	149889434	27.7049	20.7433
						MAP3K9	0.0243874	0.170956	-0.0128711																																			ZNF507	CHR19	32836513	32878573	4.77748	5.07134
						TM7SF3	-0.157096	0.343687	-0.0110144																																			TFCP2	CHR12	51484406	51566926	11.3795	13.4863
						CDCA7L	0.728173	0.332688	-0.00646294																																			ZNF140	CHR12	133657036	133684258	4.46728	5.693
						RFX1	0.0187623	0.142716	-0.00152841																																			C12ORF10	CHR12	53693469	53700965	34.3439	37.8604
						GULP1	0.251684	0.141118	0.0193469																																			SUMO1	CHR2	203043446	203103364	82.5361	105.132
						UBL7	0.0701388	0.0905176	0.0294442																																			HSD17B4	CHR5	118788137	118878030	39.0686	58.0809
						TTC39C	-0.824428	0.707425	0.0349956																																			ADNP2	CHR18	77866914	77898248	10.8345	10.9197
						SV2A	-0.417499	0.125749	0.0354064																																			PPWD1	CHR5	64859062	64883376	17.3919	22.1704
						ZNF507	0.0861194	-0.051072	0.0383396																																			HMGN3	CHR6	79910688	79946517	139.039	180.912
						TFCP2	0.245062	0.280781	0.0391934																																			C16ORF59	CHR16	2510114	2514965	43.3545	55.9144
						ZNF140	0.349792	0.276965	0.0491542																																			SEC22C	CHR3	42589458	42690326	15.2005	16.6527
						C12ORF10	0.140637	0.00317636	0.0530791																																			CDCA7	CHR2	174219560	174233783	25.7893	47.4865
						SUMO1	0.349105	0.179704	0.0695622																																			TRIT1	CHR1	40306695	40349178	19.8494	17.8615
						HSD17B4	0.572053	0.490257	0.0721396																																			KLHL20	CHR1	173684079	173755951	8.51019	6.65729
						ADNP2	0.0113018	0.066799	0.0807061																																			UCHL1	CHR4	41258897	41270616	328.544	367.872
						PPWD1	0.350222	0.0767057	0.0816897																																			SORL1	CHR11	121322911	121504471	3.84196	3.71522
						HMGN3	0.379795	0.341285	0.0867674																																			MED11	CHR17	4634665	4643223	43.5455	49.6181
						C16ORF59	0.367036	0.216291	0.086866																																			TTI1	CHR20	36611256	36661844	34.439	42.5386
						SEC22C	0.131643	0.349331	0.0932047																																			MAN1B1	CHR9	139981378	140003639	45.2974	40.1637
						CDCA7	0.880745	0.569307	0.0996669																																			GMCL1	CHR2	70056747	70108530	8.07378	14.1157
						TRIT1	-0.152244	0.291156	0.104305																																			MUTYH	CHR1	45790670	45956840	20.2988	26.3766
						KLHL20	-0.354256	0.0273383	0.119067																																			SMPD2	CHR6	109711417	109765135	6.21946	5.03601
						UCHL1	0.163116	0.599752	0.135368																																			SLC2A8	CHR9	130159420	130170170	21.8517	23.9635
						SORL1	-0.048394	0.365278	0.136007																																			SLC27A5	CHR19	59008068	59023432	5.41448	4.63678
						MED11	0.188342	-0.225094	0.139386																																			CNTLN	CHR9	17135009	17503917	9.29801	11.5617
						TTI1	0.304731	0.368825	0.149734																																			POC1A	CHR3	52108544	52188706	13.5545	20.5257
						MAN1B1	-0.173536	0.0998971	0.160605																																			CBL	CHR11	119076879	119178859	2.86564	3.37457
						GMCL1	0.805983	0.292091	0.165383																																			TBC1D2B	CHR15	78287312	78370018	3.74662	4.94584
						MUTYH	0.377862	0.485273	0.165447																																			GGCT	CHR7	30521451	30544521	46.3376	54.7056
						SMPD2	-0.304507	-0.0824459	0.169654																																			APOO	CHRX	23851464	23926099	16.3025	19.2965
						SLC2A8	0.133092	0.196956	0.170884																																			MGST1	CHR12	16500075	16517344	346.634	342.608
						SLC27A5	-0.223698	0.128535	0.171389																																			DDX11	CHR12	31173696	31257815	8.8387	11.576
						CNTLN	0.314353	0.36095	0.184325																																			PHC1	CHR12	9066525	9102470	1.68933	2.37188
						POC1A	0.598663	0.416345	0.188619																																			M6PR	CHR12	9066525	9102470	40.3094	42.316
						CBL	0.235848	0.279723	0.189555																																			RASAL2	CHR1	178060642	178448648	7.66038	6.26401
						TBC1D2B	0.400627	0.511809	0.190223																																			POLR2G	CHR11	62529010	62534710	137.891	106.766
						GGCT	0.239505	0.418825	0.194768																																			HEXIM1	CHR17	43224683	43247462	2.85565	2.79231
						APOO	0.24325	0.444201	0.194911																																			CARS2	CHR13	111267806	111358497	24.1999	33.2149
						MGST1	-0.0168535	0.514883	0.196672																																			LUC7L	CHR16	238442	279545	43.4392	72.2289
						DDX11	0.389232	0.22859	0.204906																																			ELL3	CHR15	44038588	44094984	421.376	331.532
						PHC1	0.48958	0.88357	0.205302																																			AASS	CHR7	121713538	121784344	15.3327	25.5841
						M6PR	0.0700879	0.138901	0.20647																																			THOC1	CHR18	158398	268059	20.1103	28.9081
						RASAL2	-0.290329	0.0492774	0.208416																																			CHSY1	CHR15	101715901	101792140	19.7744	13.2304
						POLR2G	-0.369076	0.171574	0.219043																																			PDK3	CHRX	24483343	24568584	6.10621	9.32456
						HEXIM1	-0.0323603	-0.0642553	0.219331																																			SLC7A1	CHR13	30083550	30169936	11.6995	12.5841
						CARS2	0.456831	0.486658	0.219627																																			ANKS6	CHR9	101494107	101558814	19.4728	27.9284
						LUC7L	0.73358	0.236404	0.226835																																			METTL7A	CHR12	51318533	51326300	1.25661	2.35895
						ELL3	-0.345958	0.0456213	0.232146																																			UBP1	CHR3	33429733	33482003	16.2905	20.9743
						AASS	0.738634	0.488433	0.234664																																			ZNF10	CHR12	133707213	133736049	1.65971	2.34205
						THOC1	0.52354	0.366551	0.247595																																			DTX2	CHR7	76090971	76135312	10.2657	12.9251
						CHSY1	-0.579776	0.360791	0.248929																																			SLC2A6	CHR9	136243283	136344317	55.3737	41.1139
						PDK3	0.610759	0.458232	0.253007																																			PHGDH	CHR1	120254418	120286849	70.4622	106.76
						SLC7A1	0.105157	0.631384	0.27496																																			KIF22	CHR16	29802033	29816706	82.9802	127.121
						ANKS6	0.520273	0.378679	0.278517																																			CYB5A	CHR18	71920526	71959251	62.9736	73.5886
						METTL7A	0.908609	1.548	0.287728																																			KBTBD7	CHR13	41763975	41768706	7.57714	11.9888
						UBP1	0.364592	0.345497	0.291606																																			SMS	CHRX	21958662	22025383	30.5822	46.9754
						ZNF10	0.496839	0.141266	0.303612																																			DBT	CHR1	100652477	100715409	1.86257	2.42041
						DTX2	0.332344	0.275851	0.31384																																			PSAT1	CHR9	80911977	80945009	69.063	109.68
						SLC2A6	-0.429575	0.26993	0.317853																																			RNASEH2B	CHR13	51483813	51544596	15.0016	20.0905
						PHGDH	0.599449	1.27703	0.34015																																			EHD2	CHR19	48216600	48246391	10.8195	6.90602
						KIF22	0.615359	0.465097	0.345973																																			TRAF2	CHR9	139780964	139822310	22.8941	37.7438
						CYB5A	0.224736	0.646128	0.358905																																			SELM	CHR22	31500673	31503696	86.8517	56.8677
						KBTBD7	0.661964	0.564538	0.364288																																			SLC38A1	CHR12	46576762	46663208	73.4941	98.9934
						SMS	0.619216	0.505222	0.366057																																			PCGF2	CHR17	36886478	36904558	36.5337	51.078
						DBT	0.377959	0.679317	0.37069																																			JARID2	CHR6	15245811	15522341	23.3151	25.9835
						PSAT1	0.667313	1.27794	0.376503																																			DDX25	CHR11	125774271	125793170	8.37556	7.57086
						RNASEH2B	0.421395	0.393001	0.400252																																			RNGTT	CHR6	89319947	89673348	6.68463	8.99988
						EHD2	-0.647707	0.115656	0.403748																																			SYT1	CHR12	79257772	79845790	24.8279	20.4214
						TRAF2	0.721266	0.285601	0.408118																																			PANX1	CHR11	93862008	93918762	18.7259	18.8292
						SELM	-0.610945	-0.0794842	0.408491																																			PIM3	CHR22	50354142	50357727	58.7054	48.4064
						SLC38A1	0.429703	0.662535	0.409814																																			CNN1	CHR19	11649578	11661199	21.3518	7.43476
						PCGF2	0.483472	0.32159	0.415161																																			KDM2B	CHR12	121865651	122019082	11.5213	11.0873
						JARID2	0.156333	0.732909	0.419084																																			FTL	CHR19	49468546	49470544	1208.77	1221.41
						DDX25	-0.145727	0.653622	0.41984																																			STT3A	CHR11	125462730	125492830	63.6775	71.2441
						RNGTT	0.429057	0.439023	0.420874																																			PLIN2	CHR9	19115758	19127604	50.6752	54.0554
						SYT1	-0.28188	0.260627	0.423167																																			KIAA1033	CHR12	105501491	105562961	11.3191	17.0192
						PANX1	0.00793317	0.0489007	0.423171																																			PIKFYVE	CHR2	209130990	209238789	3.00458	3.73472
						PIM3	-0.278295	-0.0534856	0.425581																																			RRP1B	CHR21	45079431	45115960	34.774	52.0686
						CNN1	-1.522	0.821298	0.437192																																			PLA2G16	CHR11	63340206	63382033	133.552	217.217
						KDM2B	-0.0553899	0.309669	0.44327																																			NT5DC3	CHR12	104166080	104234975	2.19351	2.66898
						FTL	0.0150053	0.518281	0.447532																																			TOB1	CHR17	48939581	48945732	10.1573	9.21372
						STT3A	0.161987	0.286766	0.447776																																			CYR61	CHR1	86046443	86049648	28.4774	11.3751
						PLIN2	0.0931574	0.374662	0.452094																																			ANKRD27	CHR19	33087906	33166102	11.7476	16.2125
						KIAA1033	0.588406	0.322789	0.455316																																			STX6	CHR1	180919620	180992071	17.7667	21.3239
						PIKFYVE	0.313836	0.571147	0.461162																																			CSRP2	CHR12	77252484	77272811	43.3244	54.9077
						RRP1B	0.582407	0.541469	0.461687																																			SKIL	CHR3	170075107	170114714	5.34598	11.855
						PLA2G16	0.701728	0.795269	0.467616																																			FGF2	CHR4	123747862	123844159	2.61274	7.05116
						NT5DC3	0.283048	0.244828	0.46861																																			RAB13	CHR1	153954114	153958869	18.5535	17.3104
						TOB1	-0.140659	0.180064	0.473123																																			PPM1N	CHR19	45988084	46005957	3.89297	2.80831
						CYR61	-1.32394	0.053745	0.477662																																			ELOVL4	CHR6	80624528	80657315	8.51966	10.5845
						ANKRD27	0.464747	0.656538	0.51108																																			ERCC6L	CHRX	71401525	71483814	2.69062	4.21478
						STX6	0.263299	0.658711	0.516544																																			MAD2L2	CHR1	11724149	11781140	109.038	236.748
						CSRP2	0.341829	0.661439	0.522041																																			TSPAN4	CHR11	842823	867193	40.9071	71.3649
						SKIL	1.14897	0.850364	0.549607																																			PNPLA2	CHR11	818900	825571	24.9572	30.3381
						FGF2	1.4323	0.969295	0.556554																																			MED12L	CHR3	150804578	151176497	0.958782	1.2809
						RAB13	-0.100053	0.559825	0.56706																																			DDX3Y	CHRY	15016018	15032425	16.4943	24.9871
						PPM1N	-0.471167	0.474333	0.570868																																			DPPA4	CHR3	109044869	109056428	94.1287	168.504
						ELOVL4	0.313089	0.380838	0.592243																																			C19ORF25	CHR19	1450147	1479512	27.8704	59.4141
						ERCC6L	0.647515	0.469783	0.598325																																			TIMP2	CHR17	76840081	76921472	3.68137	2.9068
						MAD2L2	1.11852	1.02957	0.607668																																			CHKA	CHR11	67819449	67906290	30.9862	38.9189
						TSPAN4	0.802862	0.696251	0.610619																																			SLC39A14	CHR8	22224761	22291640	39.7339	44.4372
						PNPLA2	0.281679	0.297002	0.615737																																			TERF1	CHR8	73921045	73960097	3.52393	12.0686
						MED12L	0.417879	0.680415	0.620564																																			SLC1A5	CHR19	47278139	47291842	145.394	140.481
						DDX3Y	0.599216	0.501091	0.642981																																			NUAK1	CHR12	106457119	106534219	3.63516	1.59021
						DPPA4	0.840071	1.00158	0.647189																																			ZNF549	CHR19	58038692	58071154	2.72725	3.84204
						C19ORF25	1.09207	0.616513	0.65873																																			SOX8	CHR16	1031807	1036979	8.90272	7.70413
						TIMP2	-0.34081	0.37114	0.67756																																			YBX2	CHR17	7191535	7197876	2.77954	4.9559
						CHKA	0.328848	0.60463	0.680983																																			MAFF	CHR22	38597938	38612517	4.37527	1.91931
						SLC39A14	0.161398	0.68451	0.682137																																			ACTN1	CHR14	69340838	69446083	69.9072	90.8951
						TERF1	1.776	1.36621	0.707892																																			SEPHS1	CHR10	13359424	13390331	23.7878	48.2146
						SLC1A5	-0.0495975	0.775602	0.713699																																			ZNF707	CHR8	144766621	144791441	2.23494	2.71679
						NUAK1	-1.1928	0.533237	0.718564																																			SS18L2	CHR3	42589458	42690326	62.9805	96.3461
						ZNF549	0.494426	0.438117	0.733713																																			RRN3	CHR16	15068832	15254763	11.2266	15.1673
						SOX8	-0.208613	0.479429	0.739716																																			PNN	CHR14	39644386	39661918	22.1127	37.6609
						YBX2	0.834302	0.931687	0.745324																																			ZNF613	CHR19	52358872	52531710	2.87333	5.62194
						MAFF	-1.18879	0.406295	0.74557																																			C9ORF135	CHR9	72435725	72521492	5.08286	8.64197
						ACTN1	0.378763	0.938096	0.751171																																			ZNF398	CHR7	148823507	148880118	6.87365	12.3285
						SEPHS1	1.01925	1.21092	0.754288																																			CTGF	CHR6	132269313	132272518	31.8851	12.5688
						ZNF707	0.281664	0.256068	0.781125																																			KCNN2	CHR5	113698015	113832197	0.97711	2.18162
						SS18L2	0.613321	0.762172	0.7959																																			BLVRB	CHR19	40935592	40971725	14.288	26.3516
						RRN3	0.434039	0.72964	0.797357																																			ZNF560	CHR19	9576932	9618974	4.0395	8.13428
						PNN	0.768193	0.830098	0.806187																																			MYO1E	CHR15	59428167	59665082	8.57721	9.48955
						ZNF613	0.968345	0.921973	0.811734																																			SETD4	CHR21	37406835	37432819	11.3084	11.4926
						C9ORF135	0.76572	0.651539	0.825365																																			OGFR	CHR20	61436176	61445378	48.3765	65.3021
						ZNF398	0.842854	1.07937	0.835475																																			PLEKHG4B	CHR5	92261	190087	10.4188	14.0181
						CTGF	-1.34304	0.628838	0.835789																																			CHST11	CHR12	104850691	105155792	2.28328	3.64821
						KCNN2	1.15881	1.29743	0.837167																																			TARS2	CHR1	150459909	150480173	38.8054	55.6099
						BLVRB	0.883089	0.609255	0.853018																																			C19ORF66	CHR19	10196805	10213425	3.29645	1.79239
						ZNF560	1.00984	0.797748	0.865312																																			SMPDL3B	CHR1	28261503	28285806	2.11135	10.4952
						MYO1E	0.145831	-0.0798983	0.869236																																			KIAA0907	CHR1	155882812	155904205	8.35261	12.2954
						SETD4	0.0233132	0.499942	0.883487																																			DBNDD1	CHR16	90071276	90086200	31.4337	58.651
						OGFR	0.432823	0.667674	0.893342																																			NSUN2	CHR5	6599351	6633473	41.8279	69.929
						PLEKHG4B	0.428106	0.830845	0.89503																																			EIF4E3	CHR3	71728439	71834357	0.944485	3.06276
						CHST11	0.676081	0.773574	0.956115																																			PHF19	CHR9	123617930	123639617	15.4859	24.7446
						TARS2	0.519083	0.981565	0.968883																																			CXCL12	CHR10	44865604	44880545	1.37521	4.4056
						C19ORF66	-0.879027	1.07684	0.971276																																			RRM2B	CHR8	103216728	103251346	8.81578	15.4036
						SMPDL3B	2.3135	2.10447	0.980656																																			RBP1	CHR3	139236275	139258671	45.3856	98.4102
						KIAA0907	0.557817	0.899971	0.981304																																			CBS	CHR21	44470440	44496472	112.112	289.742
						DBNDD1	0.899843	0.849226	0.982469																																			CCND1	CHR11	69455872	69469334	28.2205	67.5097
						NSUN2	0.741425	0.887413	0.988707																																			DNAH14	CHR1	225117355	225586996	13.4036	21.1974
						EIF4E3	1.69723	1.67114	0.992991																																			IGSF1	CHRX	130407480	130423403	3.00457	8.78204
						PHF19	0.676159	1.09226	1.00708																																			ATG2B	CHR14	96747594	96829678	2.3306	3.87588
						CXCL12	1.67969	1.93069	1.0759																																			RARRES2	CHR7	150035406	150038763	4.61203	3.73888
						RRM2B	0.805107	1.2035	1.07607																																			NOTCH1	CHR9	139388892	139440462	7.81256	8.39639
						RBP1	1.11657	1.29513	1.11167																																			ZNF528	CHR19	52772823	53095438	1.39678	3.02192
						CBS	1.36982	1.36288	1.12684																																			TRIP6	CHR7	100464949	100471076	35.2914	80.4703
						CCND1	1.25835	0.904729	1.12731																																			DDB2	CHR11	47236492	47290584	12.1646	20.2682
						DNAH14	0.661267	1.23849	1.13115																																			TBC1D8	CHR2	101618571	101767892	3.66769	10.0494
						IGSF1	1.5474	1.72714	1.20484																																			BMP7	CHR20	55743808	55841719	2.75076	11.1822
						ATG2B	0.733826	0.58397	1.20682																																			RAP1GAP2	CHR17	2699731	2941035	1.66201	5.97838
						RARRES2	-0.302797	1.39229	1.2184																																			NRN1L	CHR16	67918780	67920275	5.44662	11.8297
						NOTCH1	0.103974	0.700375	1.24507																																			TNFRSF12A	CHR16	3070312	3072383	68.5195	83.4807
						ZNF528	1.11336	1.07485	1.24942																																			ZDHHC23	CHR3	113557680	113682428	0.515218	3.13457
						TRIP6	1.18914	1.26044	1.39411																																			SYT6	CHR1	114631912	114696477	5.55671	23.7444
						DDB2	0.736532	1.3499	1.39756																																			CNTNAP2	CHR7	145813452	148118090	2.31907	14.1167
						TBC1D8	1.45417	1.6858	1.52459																																			COL1A1	CHR17	48261456	48287426	7.65224	4.67751
						BMP7	2.0233	1.42212	1.53666																																			KIAA1522	CHR1	33207371	33324527	2.09312	6.14201
						RAP1GAP2	1.84683	1.66657	1.69662																																			ZIC3	CHRX	136648345	136659852	3.87523	27.7855
						NRN1L	1.11898	1.5098	1.74968																																			HRASLS5	CHR11	63014620	63330855	3.01515	13.2788
						TNFRSF12A	0.284928	1.24121	1.79363																																			GAL	CHR11	68451982	68465848	138.984	323.36
						ZDHHC23	2.60501	2.25483	1.84838																																			DCLK1	CHR13	35516423	36705514	0.428276	2.41051
						SYT6	2.09528	1.74523	1.87743																																			FBXO2	CHR1	11708417	11723384	9.0715	22.4911
						CNTNAP2	2.60579	1.95833	1.96784																																			CBR1	CHR21	37441939	37498938	46.1199	61.1646
						COL1A1	-0.71014	1.17884	2.01663																																			TMEM125	CHR1	43727349	43739673	0.236685	2.40779
						KIAA1522	1.55305	1.7316	2.05254																																			FZD5	CHR2	208626068	208635024	2.39566	17.459
						ZIC3	2.84198	2.4905	2.12828																																			MARVELD2	CHR5	68710938	68740110	1.30117	10.1613
						HRASLS5	2.13882	2.38905	2.35999																																			COL9A3	CHR20	61448311	61493176	34.6263	242.805
						GAL	1.21823	2.28394	2.37264																																			EPHA1	CHR7	143076710	143220540	2.47605	15.8037
						DCLK1	2.49273	2.70935	2.46515																																			PAPSS2	CHR10	89419374	89507523	0.320668	6.23395
						FBXO2	1.30994	2.17727	2.51887																																			MAL2	CHR8	120220609	120257914	0.94057	13.9517
						CBR1	0.407307	1.4467	2.60869																																			CHST9	CHR18	24432007	24765302	0.230685	4.36458
						TMEM125	3.34667	2.65839	2.69437																																			ADAMTS19	CHR5	128796006	129074498	0.540521	4.22837
						FZD5	2.86548	2.96652	3.06261																																			ARHGEF5	CHR7	144052488	144077725	0.0753734	1.01074
						MARVELD2	2.9652	3.094	3.18646																																			EPHX3	CHR19	15337729	15343858	1.2674	15.7044
						COL9A3	2.80986	3.21397	3.408																																			MRGPRF	CHR11	68771766	68780850	0.433102	2.46956
						EPHA1	2.67415	3.40285	3.48934																																			KDR	CHR4	55944425	55991762	0.333301	1.5315
						PAPSS2	4.28099	3.87748	3.60587																																			SPIB	CHR19	50922194	50934309	0.0588632	0.914806
						MAL2	3.89077	4.41072	3.65016																																			SCNN1A	CHR12	6456008	6486523	0.28652	15.391
						CHST9	4.24185	4.09953	3.66304																																			CDH3	CHR16	68678150	68732957	1.0799	47.0072
						ADAMTS19	2.96768	3.72288	3.68304
						ARHGEF5	3.74522	3.97292	4.13802
						EPHX3	3.63122	3.83333	4.36718
						MRGPRF	2.51147	4.55116	4.77638
						KDR	2.20004	4.28969	4.80878
						SPIB	3.95803	5.14328	5.21343
						SCNN1A	5.74731	6.01572	5.87517
						CDH3	5.44391	5.98058	6.15291
[truncated: 16 more columns]
