# Supplementary material for: Global hyperactivation of enhancers stabilizes human and mouse naive pluripotency through inhibition of CDK8/19 Mediator kinases
Source: Springer Nature journal article supplement (doi:10.1038/s41556-020-0573-1), 2020-09-28
Supplement: MOESM28 [file 41556_2020_573_MOESM28_ESM.xlsx]

## Sheet: Ex Data Fig 10C
Fig S10C	QUANTIFICATION CYCLIN C AND OCT4 LEVELS in embryos from E4.5, E5.0, and E5.5.
	QUANTIFICATION CYCLIN C AND OCT4 LEVELS						Two independent experiments
							Embryo Stage			E4.5	E5.0	E5.5						T-test
							Number of embryos (total)			8	10	11						Unpaired
	EXPERIMENT1 120718																	Two-tailed
			E4.5					E5.0					E5.5
	Santa Cruz Cyclin C antibody					Santa Cruz Cyclin C antibody					Santa Cruz Cyclin C antibody
	Image E4.5	EPI nuclear	EPI cytoplasm	Ratio	Normalization	Image E5.0	EPI nuclear	EPI cytoplasm	Ratio	Normalization	Image E5.5	EPI nuclear	EPI cytoplasm	Ratio	Normalization				Cyclin C Nuc/Cyto ratio: average per embryo
	Series001 z11	78.239	71.276	1.09769	1.08356	Series001 z9	64.905	58.673	1.10622	1.09197	Series001 z9	41.759	26.892	1.55284	1.53285
	Series002 z10	64.386	69.352	0.928394	0.916442	Series002 z13	62.632	49.683	1.26063	1.2444	Series002 z15	64.177	41.408	1.54987	1.52992			Embryo stages:	E4.5 vs E5.0
				1.01304	1				1.18342	1.16819				1.55136	1.53138				P-value	Significant?
																			P<0,0001	yes
	EXPERIMENT2 130818
			E4.5					E5.0					E5.5						Cyclin C Nuc/Cyto ratio: average per embryo
	Santa Cruz Cyclin Cantibody					Santa Cruz Cyclin C antibody					Santa Cruz Cyclin C antibody
	Image E4.5	EPI nuclear	EPI cytoplasm	Ratio	Normalization	Image E5.0	EPI nuclear	EPI cytoplasm	Ratio	Normalization	Image E5.5	EPI nuclear	EPI cytoplasm	Ratio	Normalization			Embryo stages:	E4.5 vs E5.5
	Series001 z13	132.612	137.357	0.965455	1.00775	Series001 z11	114.422	87.8	1.30321	1.3603	Series001 - E4.5- z13	80.223	62.341	1.28684	1.34322				P-value	Significant?
	Series002 z11	91.937	104.666	0.878385	0.916866	Series002 z6	75.68	61.575	1.22907	1.28292	Series001 z14	72.657	61.023	1.19065	1.24281				P=0,0042	yes
	Series003 z10	108.855	110.665	0.983644	1.02674	Series003 z7	141.55	112.128	1.2624	1.3177	Series002 z8	76.888	70.486	1.09083	1.13861
	Series004 z10	121.829	142.434	0.855337	0.892808	Series004 z7	85.037	64.579	1.31679	1.37448	Series004 z11	69.684	58.618	1.18878	1.24086
	Series005 z8	91.608	82.729	1.10733	1.15584	Series005 z15	86.893	64.642	1.34422	1.40311	Series005 z10	149.271	108.152	1.3802	1.44066				Cyclin C Nuc/Cyto ratio: average per embryo
				0.958029	1	Series006 z8	90.805	80.516	1.12779	1.1772	Series006 z9	73.974	56.815	1.30202	1.35906
						Series007 z6	70.407	52.097	1.35146	1.41067	Series007 z6	70.328	69.801	1.00755	1.05169			Embryo stages:	E5.0 vs E5.5
						Series008 z9	111.35	90.242	1.2339	1.28796	Series008 z6	93.117	88.765	1.04903	1.09499				P-value	Significant?
									1.27111	1.32679	Series009 z3	71.116	57.887	1.22853	1.28235				P=0,8866	ns
											Series010 z6	76.811	69.292	1.10851	1.15708
														1.18329	1.23513
	EXPERIMENT1 120718
			E4.5					E5.0					E5.5
	Oct4 antibody					Oct4 antibody					Oct4 antibody								Cyclin C Nuc/Cyto ratio: average per embryo
	Image E4.5	EPI nuclear	EPI cytoplasm	Ratio	Normalization	Image E5.0	EPI nuclear	EPI cytoplasm	Ratio	Normalization	Image E5.5	EPI nuclear	EPI cytoplasm	Ratio	Normalization
	Series001 z11	84.024	28.235	2.97588	0.921923	Series001 z9	88.255	51.3	1.72037	0.532968	Series001 z9	60.585	26.574	2.27986	0.706297			Embryo stages:	E4.5 vs E5.0
	Series002 z10	70.225	20.18	3.47993	1.07808	Series002	78.614	32.89	2.39021	0.740483	Series002 z15	64.726	28.088	2.3044	0.7139				P-value	Significant?
				3.22791	1				2.05529	0.636726				2.29213	0.710098				P=0,008	yes
	EXPERIMENT2 130818																		Cyclin C Nuc/Cyto ratio: average per embryo
			E4.5					E5.0					E5.5
	Oct4 antibody					Oct4 antibody					Oct4 antibody							Embryo stages:	E4.5 vs E5.5
	Image E4.5	EPI nuclear	EPI cytoplasm	Ratio	Normalization	Image E5.0	EPI nuclear	EPI cytoplasm	Ratio	Normalization	Image E5.5	EPI nuclear	EPI cytoplasm	Ratio	Normalization				P-value	Significant?
	Series001 z13	43.17	19.484	2.21566	0.842363	Series001 z11	69.717	29.273	2.38161	0.905455	Series001 - E4.5- z13	54.224	18.354	2.95434	1.1232				P=0,0128	yes
	Series002 z11	35.856	13.639	2.62893	0.999481	Series002 z6	36.428	18.668	1.95136	0.741879	Series001 z14	52.045	22.214	2.34289	0.890733
	Series003 z10	46.28	20.154	2.29632	0.873027	Series003 z7	52.061	28.983	1.79626	0.682912	Series002 z8	44.157	21.798	2.02574	0.770155
	Series004 z10	51.419	15.627	3.29039	1.25096	Series004 z7	33.401	16.732	1.99623	0.758939	Series004 z11	51.473	19.643	2.62042	0.996247				Cyclin C Nuc/Cyto ratio: average per embryo
	Series005 z8	30.115	11.071	2.72017	1.03417	Series005 z15	57.534	30.616	1.87921	0.714449	Series005 z10	45.098	17.126	2.63331	1.00114
				2.6303	1	Series006 z8	57.973	21	2.76062	1.04955	Series006 z9	37.73	12.915	2.92141	1.11068			Embryo stages:	E5.0 vs E5.5
						Series007 z6	35.59	17.131	2.07752	0.789843	Series007 z6	37.864	17.703	2.13885	0.813158				P-value	Significant?
						Series008 z9	45.825	26.288	1.74319	0.662736	Series008 z6	55.449	25.725	2.15545	0.819471				P=0,0791	ns
									2.07325	0.78822	Series009 z3	26.765	12.15	2.20288	0.837503
											Series010 z6	34.039	16.195	2.10182	0.799082
														2.40971	0.916137
	EXPERIMENT3 291018
			E4.5					E5.0					E5.5
	Oct4 antibody					Oct4 antibody					Oct4 antibody
	Image E4.5	EPI nuclear	EPI cytoplasm	Ratio	Normalization	Image E5.0	EPI nuclear	EPI cytoplasm	Ratio	Normalization	Image E5.5	EPI nuclear	EPI cytoplasm	Ratio	Normalization
	Position005 z3	35.29	17.144	2.05845	0.659238	Position003 z6	35.247	18.801	1.87474	0.600405	Series009 z10 -E4.5-	37.773	13.973	2.70328	0.865755
	Position014 z6	70.694	23.48	3.01082	0.964245	Position006 z5	70.11	30.455	2.30209	0.737266	Position002 z8	77.315	31.545	2.45094	0.78494
	Position015 z10	91.744	21.301	4.30703	1.37937				2.08841	0.668836	Position007 z8	57.748	32.241	1.79114	0.57363
	Series009 z11	84.323	28.162	2.99421	0.958927						Position011 z8	64.603	24.862	2.59846	0.832185
	Position012 z7	47.139	14.541	3.2418	1.03822						Position013 z9	52.448	25.709	2.04006	0.653351
				3.12246	1						Series001 z8	63.083	25.012	2.52211	0.807731
														2.351	0.752932
