# Supplementary figures and images for: Global hyperactivation of enhancers stabilizes human and mouse naive pluripotency through inhibition of CDK8/19 Mediator kinases
Source: Springer Nature journal article supplement (doi:10.1038/s41556-020-0573-1), 2020-09-28

Fig 2M

NANOG and OCT4 in human PSCs +/- CD8/19i

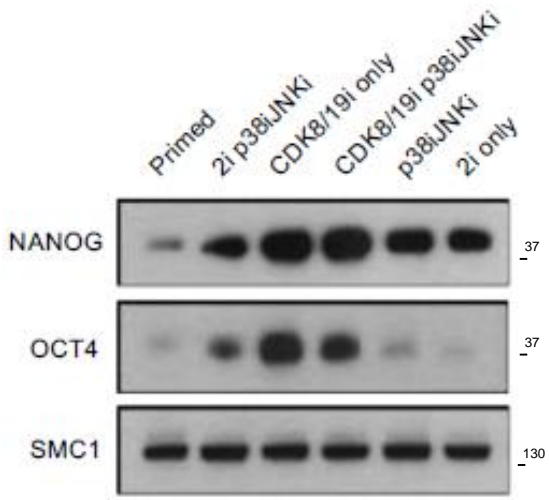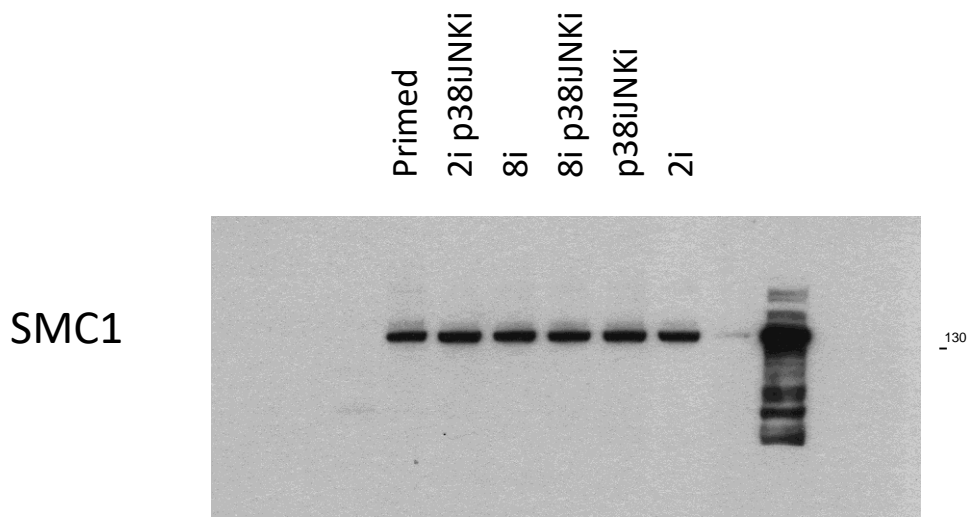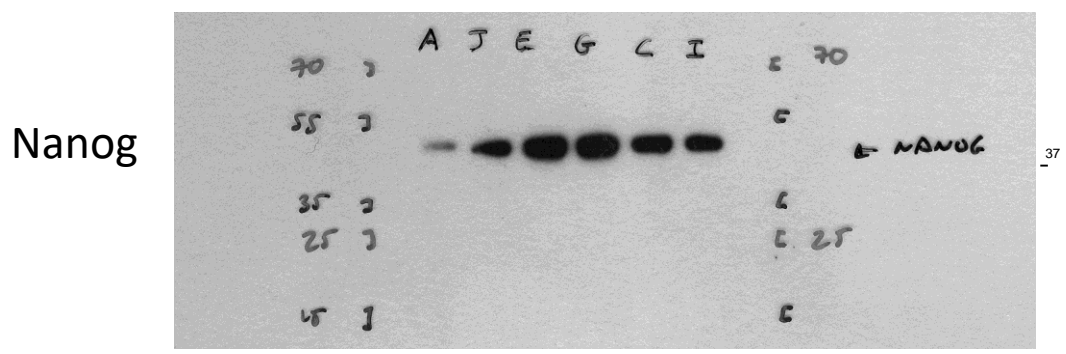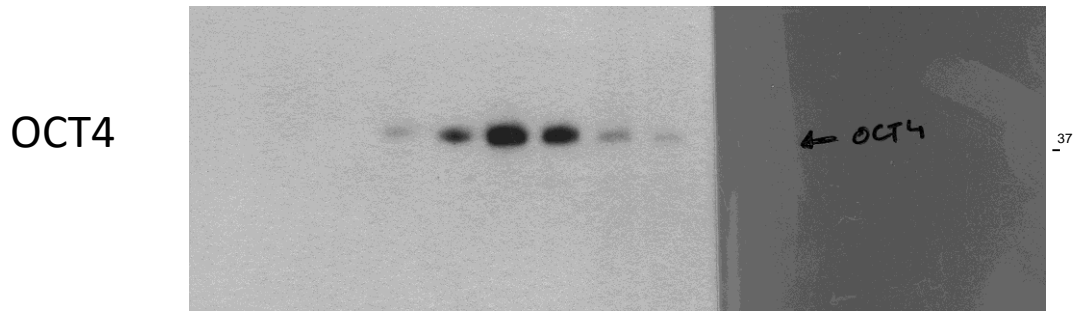

Supplement: MOESM8 [file 41556_2020_573_MOESM8_ESM.pdf]
